# Supplementary material for: Association between targeted somatic mutation (TSM) signatures and HGS‐OvCa progression
Source: PubMed Central journal article supplement (PMC5055158; doi:10.1002/cam4.825), 2016-08-03
Supplement: CAM4-5-2629-s001.pdf [file CAM4-5-2629-s001.pdf]

**Supporting Information Table S1. Clinical Data. (Lindley et al, 2015)**

| CLINICAL DATA   |                        |              |             |             |                  |                                  |                         |                 |             |
|-----------------|------------------------|--------------|-------------|-------------|------------------|----------------------------------|-------------------------|-----------------|-------------|
| Patient Barcode | Age at Diagnosis (yrs) | Vital Status | Tumor Stage | Tumor Grade | Overall Survival | Progression Free Survival (mths) | Progression Free Status | Total Mutations | Test Result |
| TCGA-29-1784    | 55.37                  | LIVING       | IIIC        | G3          | 5.34             | 5.34                             | DiseaseFree             | 122             | NEGATIVE    |
| TCGA-20-1685    | 45.88                  | LIVING       | IIIC        | G3          | 16.62            | 16.62                            | DiseaseFree             | 79              | NEGATIVE    |
| TCGA-61-1915    | 50.46                  | LIVING       | IIC         | G3          | 67.70            | 67.70                            | DiseaseFree             | 118             | NEGATIVE    |
| TCGA-13-0890    | 56.90                  | LIVING       | IIIC        | G3          | 67.80            | 67.80                            | DiseaseFree             | 57              | NEGATIVE    |
| TCGA-09-2050    | 65.72                  | LIVING       | IIA         | G2          | 70.92            | 70.92                            | DiseaseFree             | 109             | NEGATIVE    |
| TCGA-04-1367    | 50.89                  | LIVING       | IIIC        | G3          | 71.28            | 71.28                            | DiseaseFree             | 89              | NEGATIVE    |
| TCGA-61-2094    | 63.75                  | LIVING       | IIIC        | G3          | 71.67            | 71.67                            | DiseaseFree             | 56              | NEGATIVE    |
| TCGA-13-0886    | 67.73                  | LIVING       | IIIC        | G3          | 74.07            | 74.07                            | DiseaseFree             | 70              | NEGATIVE    |
| TCGA-23-1118    | 45.12                  | LIVING       | IIIC        | G3          | 85.77            | 85.77                            | DiseaseFree             | 64              | NEGATIVE    |
| TCGA-23-2078    | 66.36                  | LIVING       | IIIC        | G3          | 87.25            | 87.25                            | DiseaseFree             | 103             | NEGATIVE    |
| TCGA-13-0885    | 70.58                  | LIVING       | IIIC        | G3          | 91.15            | 91.15                            | DiseaseFree             | 171             | NEGATIVE    |
| TCGA-13-0793    | 40.29                  | LIVING       | IV          | G3          | 28.62            | 11.51                            | Recurred/Progressed     | 57              | NEGATIVE    |
| TCGA-13-0761    | 51.22                  | LIVING       | IV          | G3          | 33.97            | 13.84                            | Recurred/Progressed     | 106             | NEGATIVE    |
| TCGA-61-2095    | 54.23                  | DECEASED     | IIIC        | G2          | 61.54            | 14.66                            | Recurred/Progressed     | 91              | NEGATIVE    |
| TCGA-13-1499    | 56.71                  | LIVING       | IIIC        | G3          | 37.28            | 18.10                            | Recurred/Progressed     | 65              | NEGATIVE    |
| TCGA-04-1361    | 57.15                  | LIVING       | IIIB        | G3          | 32.43            | 30.36                            | Recurred/Progressed     | 124             | NEGATIVE    |
| TCGA-23-1809    | 63.32                  | LIVING       | IIC         | G3          | 0.52             | 0.52                             | DiseaseFree             | 70              | POSITIVE    |
| TCGA-61-1895    | 52.21                  | LIVING       | IIIB        | G3          | 1.54             | 1.54                             | DiseaseFree             | 66              | POSITIVE    |
| TCGA-13-1512    | 49.75                  | LIVING       | IIIC        | G3          | 2.33             | 2.33                             | DiseaseFree             | 57              | POSITIVE    |
| TCGA-13-1510    | 62.21                  | LIVING       | IIIC        | G3          | 2.56             | 2.56                             | DiseaseFree             | 112             | POSITIVE    |
| TCGA-20-1687    | 46.47                  | LIVING       | IV          | G3          | 2.62             | 2.62                             | DiseaseFree             | 94              | POSITIVE    |
| TCGA-20-1686    | 75.58                  | LIVING       | IIIC        | G3          | 2.92             | 2.92                             | DiseaseFree             | 87              | POSITIVE    |
| TCGA-23-1111    | 63.48                  | LIVING       | IIIC        | G3          | 3.21             | 3.21                             | DiseaseFree             | 61              | POSITIVE    |
| TCGA-24-1470    | 54.81                  | LIVING       | IIIB        | G3          | 3.41             | 3.41                             | DiseaseFree             | 82              | POSITIVE    |
| TCGA-24-1843    | 67.04                  | LIVING       | IIIC        | G3          | 3.48             | 3.48                             | DiseaseFree             | 97              | POSITIVE    |
| TCGA-24-1844    | 64.50                  | LIVING       | IIIC        | G3          | 3.70             | 3.70                             | DiseaseFree             | 175             | POSITIVE    |
| TCGA-24-1845    | 42.74                  | LIVING       | IIIC        | G3          | 3.80             | 3.80                             | DiseaseFree             | 168             | POSITIVE    |
| TCGA-13-1509    | 64.34                  | LIVING       | IV          | G3          | 4.07             | 4.07                             | DiseaseFree             | 80              | POSITIVE    |

|              |       |          |      |    |       |       |             |     |          |
|--------------|-------|----------|------|----|-------|-------|-------------|-----|----------|
| TCGA-13-1505 | 63.67 | LIVING   | IIIC | G3 | 4.20  | 4.20  | DiseaseFree | 58  | POSITIVE |
| TCGA-23-1120 | 60.68 | LIVING   | IIIC | G3 | 4.26  | 4.26  | DiseaseFree | 73  | POSITIVE |
| TCGA-24-1846 | 45.30 | LIVING   | IIIC | G3 | 4.36  | 4.36  | DiseaseFree | 121 | POSITIVE |
| TCGA-23-1116 | 83.46 | LIVING   | IIIC | G3 | 4.56  | 4.56  | DiseaseFree | 58  | POSITIVE |
| TCGA-13-1507 | 77.93 | LIVING   | IIIC | G3 | 4.75  | 4.75  | DiseaseFree | 86  | POSITIVE |
| TCGA-24-1850 | 72.24 | LIVING   | IIIC | G3 | 5.48  | 5.48  | DiseaseFree | 89  | POSITIVE |
| TCGA-13-0924 | 45.70 | LIVING   | IV   | G3 | 5.67  | 5.67  | DiseaseFree | 62  | POSITIVE |
| TCGA-24-1849 | 80.97 | LIVING   | IIIC | G3 | 5.74  | 5.74  | DiseaseFree | 92  | POSITIVE |
| TCGA-61-1900 | 51.95 | LIVING   | IIIB | G3 | 5.80  | 5.80  | DiseaseFree | 110 | POSITIVE |
| TCGA-09-2044 | 77.34 | LIVING   | IIB  | G3 | 6.10  | 6.19  | DiseaseFree | 84  | POSITIVE |
| TCGA-24-1423 | 61.04 | LIVING   | IIIC | G3 | 6.23  | 6.23  | DiseaseFree | 63  | POSITIVE |
| TCGA-13-0923 | 74.19 | LIVING   | IIIC | G3 | 6.39  | 6.39  | DiseaseFree | 138 | POSITIVE |
| TCGA-29-1783 | 58.31 | LIVING   | IIIC | G3 | 7.18  | 7.18  | DiseaseFree | 72  | POSITIVE |
| TCGA-24-1417 | 54.18 | LIVING   | IV   | G3 | 7.80  | 7.80  | DiseaseFree | 58  | POSITIVE |
| TCGA-29-1781 | 69.60 | LIVING   | IIIC | G3 | 8.33  | 8.33  | DiseaseFree | 110 | POSITIVE |
| TCGA-61-1899 | 81.32 | LIVING   | IIIC | G3 | 8.69  | 8.69  | DiseaseFree | 65  | POSITIVE |
| TCGA-23-1029 | 46.27 | LIVING   | IIIC | G3 | 8.79  | 8.79  | DiseaseFree | 87  | POSITIVE |
| TCGA-24-1469 | 71.06 | LIVING   | IIIC | G3 | 9.08  | 9.08  | DiseaseFree | 153 | POSITIVE |
| TCGA-61-1904 | 60.29 | LIVING   | IIIC | G3 | 9.18  | 9.18  | DiseaseFree | 102 | POSITIVE |
| TCGA-24-1847 | 45.33 | LIVING   | IV   | G3 | 10.75 | 10.75 | DiseaseFree | 96  | POSITIVE |
| TCGA-09-2056 | 62.64 | LIVING   | IIIC | G3 | 12.43 | 12.43 | DiseaseFree | 73  | POSITIVE |
| TCGA-13-0919 | 52.98 | LIVING   | IIIC | G3 | 14.85 | 14.85 | DiseaseFree | 52  | POSITIVE |
| TCGA-13-0916 | 49.83 | LIVING   | IIIC | G3 | 21.08 | 21.08 | DiseaseFree | 72  | POSITIVE |
| TCGA-29-1769 | 40.42 | LIVING   | IIIC | G3 | 22.92 | 22.92 | DiseaseFree | 94  | POSITIVE |
| TCGA-20-0991 | 78.69 | LIVING   | IIB  | G3 | 25.25 | 25.25 | DiseaseFree | 83  | POSITIVE |
| TCGA-36-1577 | 43.30 | LIVING   | IIC  | G2 | 25.67 | 25.67 | DiseaseFree | 50  | POSITIVE |
| TCGA-61-2012 | 81.72 | LIVING   | IIC  | G2 | 30.62 | 30.62 | DiseaseFree | 114 | POSITIVE |
| TCGA-13-0762 | 65.64 | LIVING   | IIIC | G3 | 32.16 | 32.16 | DiseaseFree | 146 | POSITIVE |
| TCGA-29-1711 | 45.16 | LIVING   | IIIC | G2 | 34.52 | 34.52 | DiseaseFree | 116 | POSITIVE |
| TCGA-29-1699 | 57.89 | DECEASED | IIIC | G3 | 36.26 | 36.26 | DiseaseFree | 95  | POSITIVE |
| TCGA-61-1910 | 56.92 | LIVING   | IIC  | G3 | 37.05 | 37.05 | DiseaseFree | 155 | POSITIVE |
| TCGA-61-1737 | 42.55 | LIVING   | IV   | G3 | 44.23 | 44.23 | DiseaseFree | 91  | POSITIVE |
| TCGA-13-0906 | 50.36 | LIVING   | IIIC | G3 | 44.82 | 44.82 | DiseaseFree | 83  | POSITIVE |

|              |       |          |      |    |       |       |                     |     |          |
|--------------|-------|----------|------|----|-------|-------|---------------------|-----|----------|
| TCGA-13-0905 | 51.39 | LIVING   | IIIC | G3 | 47.70 | 47.70 | DiseaseFree         | 62  | POSITIVE |
| TCGA-25-2391 | 57.36 | DECEASED | IIIC | G3 | 48.92 | 48.92 | DiseaseFree         | 54  | POSITIVE |
| TCGA-04-1336 | 55.53 | LIVING   | IIIB | G3 | 49.02 | 49.02 | DiseaseFree         | 60  | POSITIVE |
| TCGA-61-1913 | 48.12 | LIVING   | IIIB | G3 | 49.08 | 49.08 | DiseaseFree         | 61  | POSITIVE |
| TCGA-13-0900 | 59.47 | LIVING   | IIIC | G3 | 56.59 | 56.59 | DiseaseFree         | 90  | POSITIVE |
| TCGA-04-1347 | 81.36 | LIVING   | IV   | G3 | 62.89 | 62.89 | DiseaseFree         | 116 | POSITIVE |
| TCGA-13-1481 | 76.43 | DECEASED | IIIC | G2 | 86.82 | 86.82 | DiseaseFree         | 104 | POSITIVE |
| TCGA-13-0755 | 75.17 | DECEASED | IV   | G3 | 2.46  | 1.11  | Recurred/Progressed | 97  | POSITIVE |
| TCGA-61-2009 | 65.12 | LIVING   | IIIC | G3 | 39.87 | 3.44  | Recurred/Progressed | 65  | POSITIVE |
| TCGA-13-0714 | 55.10 | DECEASED | IV   | G3 | 6.10  | 3.51  | Recurred/Progressed | 67  | POSITIVE |
| TCGA-04-1356 | 62.61 | DECEASED | IIC  | G3 | 49.15 | 5.11  | Recurred/Progressed | 66  | POSITIVE |
| TCGA-61-1733 | 71.72 | LIVING   | IIIC | G3 | 31.80 | 5.84  | Recurred/Progressed | 124 | POSITIVE |
| TCGA-29-1698 | 53.73 | LIVING   | IIIC | G3 | 68.10 | 5.90  | Recurred/Progressed | 30  | POSITIVE |
| TCGA-30-1891 | 61.22 | DECEASED | IIIC | G2 | 29.97 | 5.93  | Recurred/Progressed | 71  | POSITIVE |
| TCGA-25-1318 | 54.12 | DECEASED | IIIC | G3 | 34.89 | 6.07  | Recurred/Progressed | 114 | POSITIVE |
| TCGA-24-1431 | 67.83 | DECEASED | IIIC | G3 | 19.11 | 6.52  | Recurred/Progressed | 59  | POSITIVE |
| TCGA-30-1856 | 56.51 | DECEASED | IIIC | G3 | 15.64 | 7.18  | Recurred/Progressed | 74  | POSITIVE |
| TCGA-04-1362 | 59.58 | DECEASED | IIC  | G3 | 44.20 | 7.31  | Recurred/Progressed | 67  | POSITIVE |
| TCGA-30-1714 | 68.58 | DECEASED | IV   | G3 | 37.97 | 7.90  | Recurred/Progressed | 74  | POSITIVE |
| TCGA-61-1906 | 55.81 | DECEASED | IIIC | G3 | 34.23 | 7.93  | Recurred/Progressed | 130 | POSITIVE |
| TCGA-09-0369 | 56.73 | DECEASED | IIIC | G3 | 35.44 | 8.95  | Recurred/Progressed | 138 | POSITIVE |
| TCGA-13-0791 | 58.57 | LIVING   | IIIC | G3 | 38.82 | 9.21  | Recurred/Progressed | 69  | POSITIVE |
| TCGA-29-1705 | 48.03 | DECEASED | IIIC | G2 | 18.20 | 9.28  | Recurred/Progressed | 58  | POSITIVE |
| TCGA-61-1738 | 60.16 | DECEASED | IIIC | G3 | 35.93 | 9.28  | Recurred/Progressed | 150 | POSITIVE |
| TCGA-29-1702 | 84.68 | DECEASED | IIIC | G3 | 23.87 | 9.34  | Recurred/Progressed | 63  | POSITIVE |
| TCGA-24-2035 | 65.35 | DECEASED | IIIC | G3 | 28.10 | 9.41  | Recurred/Progressed | 83  | POSITIVE |
| TCGA-13-0795 | 66.94 | LIVING   | IIIC | G3 | 18.56 | 9.70  | Recurred/Progressed | 71  | POSITIVE |
| TCGA-13-0920 | 65.93 | LIVING   | IIIC | G3 | 13.77 | 9.74  | Recurred/Progressed | 111 | POSITIVE |
| TCGA-13-0904 | 63.86 | LIVING   | IIIC | G3 | 47.18 | 9.77  | Recurred/Progressed | 115 | POSITIVE |
| TCGA-04-1638 | 57.50 | DECEASED | IV   | G3 | 55.25 | 9.77  | Recurred/Progressed | 62  | POSITIVE |
| TCGA-29-1701 | 56.81 | DECEASED | IIIC | G3 | 16.89 | 9.77  | Recurred/Progressed | 59  | POSITIVE |
| TCGA-61-2113 | 54.01 | DECEASED | IIC  | G3 | 22.39 | 9.77  | Recurred/Progressed | 75  | POSITIVE |
| TCGA-24-0975 | 58.68 | DECEASED | IIIC | G3 | 21.74 | 9.87  | Recurred/Progressed | 55  | POSITIVE |

|              |       |          |      |    |        |       |                     |     |          |
|--------------|-------|----------|------|----|--------|-------|---------------------|-----|----------|
| TCGA-25-2393 | 81.05 | DECEASED | IIIC | G3 | 37.93  | 10.00 | Recurred/Progressed | 56  | POSITIVE |
| TCGA-24-1464 | 70.89 | DECEASED | IIIC | G3 | 12.43  | 10.59 | Recurred/Progressed | 55  | POSITIVE |
| TCGA-29-1703 | 56.50 | LIVING   | IIIC | G2 | 55.08  | 10.62 | Recurred/Progressed | 99  | POSITIVE |
| TCGA-24-2290 | 56.24 | DECEASED | IIIC | G3 | 36.13  | 10.62 | Recurred/Progressed | 116 | POSITIVE |
| TCGA-23-1110 | 42.15 | LIVING   | IIIC | G3 | 54.36  | 10.69 | Recurred/Progressed | 102 | POSITIVE |
| TCGA-24-1474 | 57.27 | DECEASED | IIIC | G3 | 22.13  | 10.85 | Recurred/Progressed | 61  | POSITIVE |
| TCGA-29-1775 | 51.90 | LIVING   | IIIC | G2 | 12.33  | 11.18 | Recurred/Progressed | 124 | POSITIVE |
| TCGA-29-1696 | 43.34 | DECEASED | IIIC | G2 | 33.84  | 11.21 | Recurred/Progressed | 170 | POSITIVE |
| TCGA-04-1530 | 68.53 | DECEASED | IIIC | G3 | 118.75 | 11.48 | Recurred/Progressed | 63  | POSITIVE |
| TCGA-13-1488 | 59.52 | DECEASED | IV   | G3 | 70.62  | 11.51 | Recurred/Progressed | 126 | POSITIVE |
| TCGA-13-1501 | 50.49 | LIVING   | IV   | G3 | 31.57  | 11.67 | Recurred/Progressed | 142 | POSITIVE |
| TCGA-29-1770 | 54.83 | LIVING   | IIIC | G2 | 24.30  | 12.36 | Recurred/Progressed | 98  | POSITIVE |
| TCGA-04-1338 | 78.87 | LIVING   | IIIC | G3 | 46.49  | 12.46 | Recurred/Progressed | 135 | POSITIVE |
| TCGA-25-1313 | 62.96 | DECEASED | IV   | G3 | 26.85  | 12.92 | Recurred/Progressed | 145 | POSITIVE |
| TCGA-25-1326 | 61.20 | DECEASED | IIIC | G3 | 40.92  | 12.95 | Recurred/Progressed | 141 | POSITIVE |
| TCGA-24-1563 | 66.50 | DECEASED | IIIC | G3 | 47.57  | 12.98 | Recurred/Progressed | 75  | POSITIVE |
| TCGA-13-0893 | 48.31 | DECEASED | IIIC | G3 | 41.31  | 13.18 | Recurred/Progressed | 81  | POSITIVE |
| TCGA-24-1616 | 56.95 | DECEASED | IIIC | G3 | 38.13  | 13.28 | Recurred/Progressed | 60  | POSITIVE |
| TCGA-23-1117 | 42.99 | DECEASED | IIIC | G3 | 33.21  | 13.70 | Recurred/Progressed | 208 | POSITIVE |
| TCGA-24-2024 | 72.53 | DECEASED | IIIC | G3 | 58.00  | 13.80 | Recurred/Progressed | 79  | POSITIVE |
| TCGA-29-1763 | 43.89 | LIVING   | IIC  | G2 | 66.59  | 14.03 | Recurred/Progressed | 124 | POSITIVE |
| TCGA-24-0979 | 53.68 | DECEASED | IV   | G3 | 41.44  | 14.03 | Recurred/Progressed | 91  | POSITIVE |
| TCGA-23-1122 | 53.53 | DECEASED | IIIC | G3 | 38.98  | 14.66 | Recurred/Progressed | 117 | POSITIVE |
| TCGA-23-1022 | 67.94 | DECEASED | IIIC | G3 | 49.54  | 14.75 | Recurred/Progressed | 184 | POSITIVE |
| TCGA-04-1331 | 79.04 | DECEASED | IIIC | G3 | 43.80  | 15.05 | Recurred/Progressed | 93  | POSITIVE |
| TCGA-09-1665 | 74.00 | DECEASED | IIIC | G2 | 41.48  | 15.34 | Recurred/Progressed | 94  | POSITIVE |
| TCGA-61-2109 | 40.80 | DECEASED | IIIC | G3 | 20.82  | 15.44 | Recurred/Progressed | 61  | POSITIVE |
| TCGA-29-1785 | 55.94 | DECEASED | IIIC | G3 | 36.20  | 15.51 | Recurred/Progressed | 162 | POSITIVE |
| TCGA-24-1435 | 57.83 | DECEASED | IIIC | G3 | 43.41  | 16.56 | Recurred/Progressed | 77  | POSITIVE |
| TCGA-13-0887 | 42.93 | DECEASED | IIIC | G3 | 66.46  | 16.82 | Recurred/Progressed | 110 | POSITIVE |
| TCGA-13-1498 | 73.48 | LIVING   | IIIC | G3 | 37.51  | 17.48 | Recurred/Progressed | 116 | POSITIVE |
| TCGA-24-2280 | 74.95 | LIVING   | IIIC | G3 | 70.26  | 17.51 | Recurred/Progressed | 151 | POSITIVE |
| TCGA-29-1768 | 50.40 | DECEASED | IV   | G3 | 31.21  | 17.93 | Recurred/Progressed | 57  | POSITIVE |

|              |       |          |      |    |        |       |                     |     |          |
|--------------|-------|----------|------|----|--------|-------|---------------------|-----|----------|
| TCGA-24-2289 | 69.02 | DECEASED | IV   | G3 | 67.18  | 18.62 | Recurred/Progressed | 149 | POSITIVE |
| TCGA-25-2398 | 71.96 | DECEASED | IIIC | G3 | 44.89  | 18.92 | Recurred/Progressed | 52  | POSITIVE |
| TCGA-25-2400 | 76.13 | DECEASED | IIIC | G3 | 41.90  | 18.92 | Recurred/Progressed | 77  | POSITIVE |
| TCGA-09-2051 | 42.88 | LIVING   | IIIC | G3 | 62.92  | 19.11 | Recurred/Progressed | 94  | POSITIVE |
| TCGA-29-1691 | 51.13 | DECEASED | IIIC | G2 | 48.20  | 20.10 | Recurred/Progressed | 197 | POSITIVE |
| TCGA-20-1683 | 65.77 | LIVING   | IIIC | G3 | 25.31  | 20.26 | Recurred/Progressed | 105 | POSITIVE |
| TCGA-23-1114 | 55.92 | DECEASED | IIIC | G3 | 68.49  | 20.79 | Recurred/Progressed | 110 | POSITIVE |
| TCGA-23-1124 | 63.03 | DECEASED | IIIC | G3 | 57.97  | 21.02 | Recurred/Progressed | 145 | POSITIVE |
| TCGA-29-1766 | 74.96 | DECEASED | IIIC | G2 | 39.28  | 22.03 | Recurred/Progressed | 75  | POSITIVE |
| TCGA-24-1103 | 50.91 | DECEASED | IIIC | G3 | 53.93  | 22.20 | Recurred/Progressed | 82  | POSITIVE |
| TCGA-10-0930 | 70.51 | DECEASED | IIIC | G3 | 34.10  | 22.30 | Recurred/Progressed | 304 | POSITIVE |
| TCGA-29-1693 | 72.05 | LIVING   | IIIC | G3 | 101.48 | 22.75 | Recurred/Progressed | 103 | POSITIVE |
| TCGA-61-1907 | 63.56 | LIVING   | IIIC | G3 | 31.38  | 24.52 | Recurred/Progressed | 130 | POSITIVE |
| TCGA-29-1764 | 49.35 | LIVING   | IIIC | G2 | 62.75  | 25.97 | Recurred/Progressed | 86  | POSITIVE |
| TCGA-13-1489 | 70.60 | LIVING   | IIIC | G2 | 82.66  | 26.43 | Recurred/Progressed | 54  | POSITIVE |
| TCGA-13-1497 | 48.02 | LIVING   | IIIC | G3 | 54.16  | 26.66 | Recurred/Progressed | 132 | POSITIVE |
| TCGA-20-0990 | 74.59 | LIVING   | IIIC | G3 | 24.07  | 26.72 | Recurred/Progressed | 81  | POSITIVE |
| TCGA-13-0792 | 40.35 | LIVING   | IIIC | G3 | 36.62  | 26.75 | Recurred/Progressed | 57  | POSITIVE |
| TCGA-13-0883 | 61.36 | DECEASED | IIIC | G3 | 68.72  | 26.82 | Recurred/Progressed | 67  | POSITIVE |
| TCGA-04-1655 | 49.28 | DECEASED | IIIB | G2 | 45.21  | 26.85 | Recurred/Progressed | 66  | POSITIVE |
| TCGA-61-2008 | 40.51 | LIVING   | IIC  | G2 | 30.69  | 26.95 | Recurred/Progressed | 61  | POSITIVE |
| TCGA-61-1725 | 40.49 | LIVING   | IIIC | G3 | 31.44  | 27.77 | Recurred/Progressed | 64  | POSITIVE |
| TCGA-13-0913 | 53.62 | LIVING   | IIIC | G3 | 29.90  | 28.56 | Recurred/Progressed | 79  | POSITIVE |
| TCGA-04-1652 | 76.98 | DECEASED | IIIC | G2 | 31.87  | 28.95 | Recurred/Progressed | 176 | POSITIVE |
| TCGA-30-1718 | 44.93 | DECEASED | IIIC | G3 | 51.77  | 29.38 | Recurred/Progressed | 125 | POSITIVE |
| TCGA-09-2049 | 64.14 | LIVING   | IIIC | G3 | 112.07 | 31.21 | Recurred/Progressed | 120 | POSITIVE |
| TCGA-24-1104 | 56.22 | DECEASED | IV   | G3 | 63.57  | 31.61 | Recurred/Progressed | 58  | POSITIVE |
| TCGA-24-1463 | 70.50 | DECEASED | IIIC | G3 | 72.72  | 31.84 | Recurred/Progressed | 59  | POSITIVE |
| TCGA-04-1651 | 53.78 | DECEASED | IIIC | G3 | 36.07  | 32.39 | Recurred/Progressed | 130 | POSITIVE |
| TCGA-04-1542 | 52.78 | DECEASED | IIIB | G2 | 83.97  | 33.93 | Recurred/Progressed | 67  | POSITIVE |
| TCGA-13-0884 | 39.96 | DECEASED | IIIC | G3 | 105.31 | 39.44 | Recurred/Progressed | 89  | POSITIVE |
| TCGA-23-2077 | 45.35 | LIVING   | IIIC | G3 | 115.57 | 40.39 | Recurred/Progressed | 72  | POSITIVE |
| TCGA-29-1762 | 59.94 | DECEASED | IV   | G2 | 86.36  | 45.05 | Recurred/Progressed | 77  | POSITIVE |

|              |       |          |      |    |       |         |                     |     |          |
|--------------|-------|----------|------|----|-------|---------|---------------------|-----|----------|
| TCGA-29-2427 | 60.11 | LIVING   | IIIC | G3 | 62.30 | 51.84   | Recurred/Progressed | 70  | POSITIVE |
| TCGA-04-1649 | 74.42 | LIVING   | IIIC | G3 | 64.46 | 54.82   | Recurred/Progressed | 69  | POSITIVE |
| TCGA-61-1914 | 65.33 | LIVING   | IIIC | G3 | 56.52 | 54.95   | Recurred/Progressed | 110 | POSITIVE |
| TCGA-13-0760 | 63.23 | DECEASED | IV   | G3 | 10.10 | Missing | DiseaseFree         | 186 | POSITIVE |
| TCGA-13-0807 | 54.49 | DECEASED | IIIC | G3 | 13.57 | Missing | DiseaseFree         | 61  | POSITIVE |
| TCGA-13-1496 | 65.80 | DECEASED | IIIC | G3 | 3.41  | Missing | DiseaseFree         | 64  | POSITIVE |
| TCGA-24-1422 | 82.83 | DECEASED | IIIC | G3 | 0.75  | Missing | DiseaseFree         | 128 | POSITIVE |
| TCGA-25-2392 | 75.80 | DECEASED | IV   | G3 | 1.02  | Missing | DiseaseFree         | 104 | POSITIVE |
| TCGA-25-2401 | 64.96 | DECEASED | IIIC | G3 | 2.95  | Missing | DiseaseFree         | 65  | POSITIVE |
| TCGA-29-1695 | 62.72 | DECEASED | IIIC | G2 | 40.30 | Missing | DiseaseFree         | 74  | POSITIVE |
| TCGA-13-1408 | 59.27 | LIVING   | IIIC | G3 | 5.90  | Missing | Recurred/Progressed | 56  | NEGATIVE |
| TCGA-29-1776 | 63.06 | LIVING   | IIIC | G3 | 11.80 | Missing | Recurred/Progressed | 47  | NEGATIVE |
| TCGA-09-1674 | 79.12 | LIVING   | IIIC | G3 | 8.52  | Missing | Recurred/Progressed | 157 | POSITIVE |
| TCGA-13-0903 | 43.03 | LIVING   | IV   | G3 | 47.25 | Missing | Recurred/Progressed | 58  | POSITIVE |
| TCGA-29-1777 | 47.55 | LIVING   | IIIC | G2 | 12.26 | Missing | Recurred/Progressed | 155 | POSITIVE |
| TCGA-61-1998 | 48.91 | LIVING   | IIIC | G3 | 5.61  | Missing | Recurred/Progressed | 95  | POSITIVE |
| TCGA-04-1337 | 78.42 | DECEASED | IIIC | G2 | 2.03  | Missing | Recurred/Progressed | 48  | POSITIVE |
| TCGA-04-1342 | 80.82 | DECEASED | IV   | G2 | 18.46 | Missing | Recurred/Progressed | 73  | POSITIVE |
| TCGA-04-1343 | 72.41 | DECEASED | IV   | G3 | 11.84 | Missing | Recurred/Progressed | 62  | POSITIVE |
| TCGA-23-1021 | 45.16 | DECEASED | IV   | G3 | 47.41 | Missing | Recurred/Progressed | 83  | POSITIVE |
| TCGA-23-1031 | 60.89 | DECEASED | IV   | G3 | 18.82 | Missing | Recurred/Progressed | 107 | POSITIVE |
| TCGA-23-1032 | 73.19 | DECEASED | IV   | G3 | 2.75  | Missing | Recurred/Progressed | 97  | POSITIVE |
| TCGA-23-1123 | 59.04 | DECEASED | IIIC | G3 | 33.38 | Missing | Recurred/Progressed | 176 | POSITIVE |
| TCGA-24-1604 | 67.04 | DECEASED | IIIC | G3 | 88.10 | Missing | Recurred/Progressed | 60  | POSITIVE |
| TCGA-24-2262 | 57.15 | DECEASED | IIIC | G3 | 0.36  | Missing | Recurred/Progressed | 69  | POSITIVE |
| TCGA-24-2267 | 58.34 | DECEASED | IIB  | G3 | 47.41 | Missing | Recurred/Progressed | 115 | POSITIVE |
| TCGA-24-2288 | 70.77 | DECEASED | IIIC | G3 | 0.82  | Missing | Recurred/Progressed | 105 | POSITIVE |
| TCGA-25-2042 | 60.62 | DECEASED | IIIC | G3 | 12.98 | Missing | Recurred/Progressed | 74  | POSITIVE |
| TCGA-29-1690 | 66.62 | DECEASED | IIIC | G2 | 47.48 | Missing | Recurred/Progressed | 54  | POSITIVE |
| TCGA-29-1761 | 80.38 | DECEASED | IIIC | G3 | 17.31 | Missing | Recurred/Progressed | 201 | POSITIVE |
| TCGA-30-1855 | 61.35 | DECEASED | IIIC | G3 | 2.46  | Missing | Recurred/Progressed | 129 | POSITIVE |
| TCGA-30-1857 | 64.91 | DECEASED | IV   | G3 | 0.13  | Missing | Recurred/Progressed | 96  | POSITIVE |
| TCGA-61-1740 | 71.68 | DECEASED | IIIC | G3 | 2.62  | Missing | Recurred/Progressed | 212 | POSITIVE |

|              |       |          |      |    |      |         |                     |    |          |
|--------------|-------|----------|------|----|------|---------|---------------------|----|----------|
| TCGA-61-2102 | 74.66 | DECEASED | IIIC | G3 | 6.56 | Missing | Recurred/Progressed | 62 | POSITIVE |
|--------------|-------|----------|------|----|------|---------|---------------------|----|----------|
