# Supplementary material for: Association between targeted somatic mutation (TSM) signatures and HGS‐OvCa progression
Source: PubMed Central journal article supplement (PMC5055158; doi:10.1002/cam4.825), 2016-08-03
Supplement: CAM4-5-2629-s002.pdf [file CAM4-5-2629-s002.pdf]

**Supporting Information: Table S2. Mutation Data. (Lindley et al, 2015)**

| Sample       | Gene       | Transcript      | AA Mutation | CDS Mutation | Validated  | 5'codon | Mutation | 3'Codon | MC | WT | MUT |
|--------------|------------|-----------------|-------------|--------------|------------|---------|----------|---------|----|----|-----|
| TCGA-13-0913 | AADA4      | ENST00000376221 | p.K175Q     |              | Unverified | CTG     | AAG      | GCC     | 1  | A  | C   |
| TCGA-25-2392 | ACIN1      | ENST00000262710 | p.Q752P     | c.2255A>C    | Verified   | ACT     | CAG      | ACC     | 2  | A  | C   |
| TCGA-13-0890 | ADAMTS20   | ENST00000389420 | p.H542P     | c.1625A>C    | Verified   | CGT     | CAT      | GGG     | 2  | A  | C   |
| TCGA-13-0885 | ADAMTS9    | ENST00000498707 | p.Q916P     | c.2747A>C    | Verified   | gat     | caa      | aga     | 2  | A  | C   |
| TCGA-13-0795 | ADPRH      | ENST00000357003 | p.Q218P     | c.653A>C     | Verified   | CTT     | CAA      | CAC     | 2  | A  | C   |
| TCGA-29-1775 | AHCTF1     | ENST00000391829 | p.Q2180P    | c.6539A>C    | Unverified | GCA     | CAA      | TCA     | 2  | A  | C   |
| TCGA-13-0807 | AKAP4      | ENST00000358526 | p.E291A     | c.872A>C     | Verified   | gga     | gag      | gag     | 2  | A  | C   |
| TCGA-24-1844 | AKNA       | ENST00000307564 | p.P1338P    | c.4014A>C    | Unverified | CCT     | CCA      | GCC     | 3  | A  | C   |
| TCGA-13-1497 | ALG2       | ENST00000476832 | p.H193P     | c.578A>C     | Verified   | TCT     | CAC      | ATA     | 2  | A  | C   |
| TCGA-29-1777 | ALK        | ENST00000389048 | p.P1142P    | c.3426A>C    | Unverified | gac     | cca      | agc     | 3  | A  | C   |
| TCGA-13-1481 | ANGPTL4    | ENST00000301455 | p.N177H     | c.529A>C     | Verified   | CAC     | AAT      | GTC     | 1  | A  | C   |
| TCGA-24-2262 | ANKFY1     | ENST00000574367 | p.R1006R    | c.3016A>C    | Verified   | CTC     | AGA      | GGC     | 1  | A  | C   |
| TCGA-24-0975 | ANKRD30A   | ENST00000361713 | p.Q1260P    | c.3779A>C    | Unverified | CAG     | CAG      | GAG     | 2  | A  | C   |
| TCGA-24-2288 | ANKRD7     | ENST00000357099 | p.K270Q     | c.808A>C     | Unverified | AAG     | AAG      | AAA     | 1  | A  | C   |
| TCGA-61-1906 | AP3D1      | ENST00000345016 | p.D1075A    | c.3224A>C    | Unverified | GTC     | GAT      | GGC     | 2  | A  | C   |
| TCGA-61-1906 | AP3D1      | ENST00000345016 | p.D1075A    | c.3224A>C    | Unverified | GTC     | GAT      | GGC     | 2  | A  | C   |
| TCGA-61-2012 | ARL4C      | ENST00000390645 | p.Q188P     | c.563A>C     | Unverified | aag     | cag      | aag     | 2  | A  | C   |
| TCGA-24-1845 | ASTN2      | ENST00000361209 | p.T567P     | c.1699A>C    | Unverified | AAG     | ACC      | GAT     | 1  | A  | C   |
| TCGA-30-1857 | ATF7       | ENST00000328463 | p.H310P     | c.929A>C     | Unverified | CAG     | CAC      | CCT     | 2  | A  | C   |
| TCGA-30-1857 | ATF7_ENSTC | ENST00000548446 | p.H310P     | c.929A>C     | Unverified | CAG     | CAC      | CCT     | 2  | A  | C   |
| TCGA-13-0791 | ATXN3L     | ENST00000380622 | p.T146T     | c.438A>C     | Verified   | gat     | aca      | tgc     | 3  | A  | C   |
| TCGA-13-0900 | BCL7A      | ENST00000538010 | p.R195R     | c.583A>C     | Verified   | CAG     | AGG      | GGC     | 1  | A  | C   |
| TCGA-13-1488 | BMX        | ENST00000357607 | p.S212R     | c.634A>C     | Verified   | acc     | agt      | cta     | 1  | A  | C   |
| TCGA-23-1122 | C10orf18   | ENST00000328090 | p.T1647T    | c.4941A>C    | Verified   | TCT     | ACA      | CAG     | 3  | A  | C   |
| TCGA-61-1907 | C10orf92   | ENST00000263170 | p.T166P     | c.496A>C     | Unverified | GCC     | ACA      | AAG     | 1  | A  | C   |
| TCGA-61-1725 | C12orf40   | ENST00000324616 | p.E369A     | c.1106A>C    | Unverified | CCA     | GAA      | AAA     | 2  | A  | C   |
| TCGA-13-0885 | C13orf26   | ENST00000380473 | p.T77P      | c.229A>C     | Verified   | TAC     | ACT      | TGG     | 1  | A  | C   |
| TCGA-61-1998 | C14orf102  | ENST00000354366 | p.H438P     | c.1313A>C    | Unverified | ATT     | CAC      | AGT     | 2  | A  | C   |
| TCGA-04-1338 | C15orf42   | ENST00000268138 | p.E840A     | c.2519A>C    | Unverified | CCT     | GAA      | TCT     | 2  | A  | C   |
| TCGA-23-1029 | C17orf28   | ENST00000425042 | p.S98R      | c.292A>C     | Unverified | TGC     | AGC      | CGG     | 1  | A  | C   |
| TCGA-25-1326 | C17orf87   | ENST00000574081 | p.P122P     | c.366A>C     | Verified   | ATC     | CCA      | AGC     | 3  | A  | C   |
| TCGA-29-1768 | C19orf18   | ENST00000314391 | p.E130A     | c.389A>C     | Unverified | GCT     | GAG      | GAA     | 2  | A  | C   |

|              |                       |                 |          |           |            |     |     |     |   |   |   |
|--------------|-----------------------|-----------------|----------|-----------|------------|-----|-----|-----|---|---|---|
| TCGA-04-1331 | C1orf173              | ENST00000326665 | p.E666A  | c.1997A>C | Verified   | TTT | GAG | AAT | 2 | A | C |
| TCGA-23-1124 | C3orf36               | ENST00000408895 | p.R54R   | c.160A>C  | Verified   | CTC | AGG | AAG | 1 | A | C |
| TCGA-13-0906 | C4A_ENST00000428956   | ENST00000428956 | p.Q1111P | c.3332A>C | Unverified | CAG | CAG | CAG | 2 | A | C |
| TCGA-13-0906 | C4B                   | ENST00000428956 | p.Q1111P | c.3332A>C | Unverified | CAG | CAG | CAG | 2 | A | C |
| TCGA-24-1844 | C6orf211              | ENST00000367294 | p.A17A   | c.51A>C   | Unverified | TTT | GCA | TAT | 3 | A | C |
| TCGA-23-1110 | C7_ENST00000313164    | ENST00000313164 | p.E585A  | c.1754A>C | Verified   | GAT | GAA | GGT | 2 | A | C |
| TCGA-23-1120 | CASP9                 | ENST00000333868 | p.Q245P  | c.734A>C  | Unverified | ctg | cag | ttc | 2 | A | C |
| TCGA-29-1764 | CC2D1B                | ENST00000371586 | p.A373A  | c.1119A>C | Unverified | CCA | GCA | ACC | 3 | A | C |
| TCGA-61-2012 | CCDC141               | ENST00000343876 | p.E600A  | c.1799A>C | Verified   | GAA | GAG | CGA | 2 | A | C |
| TCGA-10-0930 | CCDC80                | ENST00000206423 | p.K656Q  | c.1966A>C | Verified   | AGG | AAA | ATC | 1 | A | C |
| TCGA-10-0930 | CCDC80                | ENST00000206423 | p.K656Q  | c.1966A>C | Verified   | AGG | AAA | ATC | 1 | A | C |
| TCGA-09-2044 | CD109                 | ENST00000287097 | p.R1114R | c.3340A>C | Verified   | TGG | AGA | GCA | 1 | A | C |
| TCGA-04-1651 | CD1C                  | ENST00000368170 | p.S328S  | c.984A>C  | Unverified | TGC | TCA | TAT | 3 | A | C |
| TCGA-04-1651 | CD1C                  | ENST00000368170 | p.S328S  | c.984A>C  | Unverified | TGC | TCA | TAT | 3 | A | C |
| TCGA-13-0905 | CECR1                 | ENST00000399837 | p.E194A  | c.581A>C  | Verified   | CCG | GAG | GTG | 2 | A | C |
| TCGA-24-2280 | CELF6                 | ENST00000287202 | p.R390S  | c.1170A>C | Unverified | CAG | AGA | GAA | 3 | A | C |
| TCGA-13-1505 | CEP164                | ENST00000278935 | p.H1452P | c.4355A>C | Verified   | GAG | CAC | AAC | 2 | A | C |
| TCGA-61-1914 | CEP70                 | ENST00000264982 | p.E333A  | c.998A>C  | Unverified | GAT | GAG | CCC | 2 | A | C |
| TCGA-20-1687 | CHD2                  | NM_001271.1     | p.D677A  | c.2030A>C | Unverified | gaa | gac | cat | 2 | A | C |
| TCGA-20-1687 | CHD2_ENST00000394196  | ENST00000394196 | p.D677A  | c.2030A>C | Unverified | GAA | GAC | CAT | 2 | A | C |
| TCGA-13-0906 | CHUK                  | ENST00000370397 | p.K237Q  | c.709A>C  | Verified   | AAG | AAG | GAT | 1 | A | C |
| TCGA-24-2267 | CLEC11A               | ENST00000250340 | p.H281P  | c.842A>C  | Verified   | CCG | CAT | CCG | 2 | A | C |
| TCGA-23-1031 | CNOT1                 | ENST00000317147 | p.N1377H | c.4129A>C | Verified   | CTG | AAT | CCA | 1 | A | C |
| TCGA-24-2267 | CNTRL                 | ENST00000238341 | p.Q482P  | c.1445A>C | Verified   | ATA | CAA | CTA | 2 | A | C |
| TCGA-23-1117 | COL15A1               | ENST00000375001 | p.K920Q  | c.2758A>C | Verified   | CTC | AAG | GGT | 1 | A | C |
| TCGA-23-1117 | COL15A1               | ENST00000375001 | p.K920Q  | c.2758A>C | Verified   | CTC | AAG | GGT | 1 | A | C |
| TCGA-61-1910 | COL4A5                | ENST00000361603 | p.S41R   | c.121A>C  | Unverified | tgc | agt | ggc | 1 | A | C |
| TCGA-13-0884 | COL6A3                | ENST00000295550 | p.T3076T | c.9228A>C | Verified   | AGT | ACA | AAG | 3 | A | C |
| TCGA-29-1698 | COMMD9                | ENST00000263401 | p.I153L  | c.457A>C  | Unverified | AAG | ATC | CAA | 1 | A | C |
| TCGA-29-1777 | CRISPLD1              | ENST00000262207 | p.T13T   | c.39A>C   | Unverified | ACC | ACA | GTG | 3 | A | C |
| TCGA-24-1849 | CRMP1                 | ENST00000324989 | p.I356L  | c.1066A>C | Unverified | ACC | ATT | GCG | 1 | A | C |
| TCGA-61-1907 | CSMD3                 | ENST00000297405 | p.K320Q  | c.958A>C  | Unverified | aac | aaa | aac | 1 | A | C |
| TCGA-61-1907 | CSMD3_ENST00000343508 | ENST00000343508 | p.K280Q  | c.838A>C  | Unverified | AAC | AAA | AAC | 1 | A | C |
| TCGA-23-1029 | CST4                  | ENST00000217423 | p.K114Q  | c.340A>C  | Unverified | CAG | AAG | AAA | 1 | A | C |

|              |            |                 |          |            |            |     |     |     |   |   |   |
|--------------|------------|-----------------|----------|------------|------------|-----|-----|-----|---|---|---|
| TCGA-25-1326 | CTNNAL1    | ENST00000325551 | p.S387R  | c.1159A>C  | Verified   | atc | agt | cac | 1 | A | C |
| TCGA-13-0755 | CTTNBP2    | ENST00000160373 | p.G721G  | c.2163A>C  | Verified   | CAG | GGA | AAT | 3 | A | C |
| TCGA-61-2095 | CYP2A6     | ENST00000301141 | p.N407H  | c.1219A>C  | Unverified | TCC | AAC | CCC | 1 | A | C |
| TCGA-04-1542 | DAGLA      | ENST00000257215 | p.D717A  | c.2150A>C  | Verified   | GCA | GAC | CAC | 2 | A | C |
| TCGA-13-0904 | DDB2       | ENST00000256996 | p.T338P  | c.1012A>C  | Verified   | CTC | ACA | CCC | 1 | A | C |
| TCGA-29-1781 | DICER1     | ENST00000343455 | p.E275A  | c.824A>C   | Unverified | tta | gaa | gaa | 2 | A | C |
| TCGA-29-1696 | DIO3       | ENST00000359323 | p.N138H  | c.412A>C   | Unverified | CTC | AAT | TTC | 1 | A | C |
| TCGA-29-1696 | DIO3       | ENST00000359323 | p.N138H  | c.412A>C   | Unverified | CTC | AAT | TTC | 1 | A | C |
| TCGA-29-1696 | DIO3_ENSTC | ENST00000510508 | p.N164H  | c.490A>C   | Unverified | CTC | AAT | TTC | 1 | A | C |
| TCGA-29-1696 | DIO3_ENSTC | ENST00000510508 | p.N164H  | c.490A>C   | Unverified | CTC | AAT | TTC | 1 | A | C |
| TCGA-04-1336 | DLG5       | ENST00000372391 | p.R1339R | c.4015A>C  | Verified   | CGG | AGA | AAG | 1 | A | C |
| TCGA-29-1764 | DMBT1      | ENST00000368909 | p.R1161R | c.3481A>C  | Unverified | TGC | AGG | CAG | 1 | A | C |
| TCGA-29-1770 | DMBT1      | ENST00000368909 | p.I2097L | c.6289A>C  | Unverified | TCC | ATT | CGC | 1 | A | C |
| TCGA-29-1764 | DMBT1_ENS  | ENST00000368909 | p.R1161R | c.3481A>C  | Unverified | TGC | AGG | CAG | 1 | A | C |
| TCGA-29-1770 | DMBT1_ENS  | ENST00000368909 | p.I2097L | c.6289A>C  | Unverified | TCC | ATT | CGC | 1 | A | C |
| TCGA-29-1764 | DMBT1_ENS  | ENST00000368915 | p.R1161R | c.3481A>C  | Unverified | TGC | AGG | CAG | 1 | A | C |
| TCGA-29-1770 | DMBT1_ENS  | ENST00000368915 | p.I2226L | c.6676A>C  | Unverified | TCC | ATT | CGC | 1 | A | C |
| TCGA-24-1563 | DMXL2      | ENST00000251076 | p.P485P  | c.1455A>C  | Verified   | ATG | CCA | CTG | 3 | A | C |
| TCGA-29-1784 | DNAH17     | ENST00000300671 | p.H3620P | c.10859A>C | Unverified | AAG | CAC | ACA | 2 | A | C |
| TCGA-13-0885 | DNAH5      | ENST00000265104 | p.N3204H | c.9610A>C  | Verified   | ATG | AAT | ACT | 1 | A | C |
| TCGA-29-2427 | DNAH8      | NM_001371.1     | p.Q2843P | c.8528A>C  | Verified   | ttc | cag | ata | 2 | A | C |
| TCGA-04-1343 | DPYD       | ENST00000370192 | p.P462P  | c.1386A>C  | Verified   | CTC | CCA | GAA | 3 | A | C |
| TCGA-23-1124 | DSCAM      | ENST00000400454 | p.D1690A | c.5069A>C  | Verified   | GCT | GAC | TTT | 2 | A | C |
| TCGA-09-2044 | DSN1       | ENST00000373750 | p.T118T  | c.354A>C   | Verified   | ATC | ACA | GAG | 3 | A | C |
| TCGA-23-1124 | DYNC111    | ENST00000324972 | p.T566P  | c.1696A>C  | Verified   | GAC | ACC | GAG | 1 | A | C |
| TCGA-30-1718 | EFTUD1     | ENST00000268206 | p.Q931P  | c.2792A>C  | Unverified | CTA | CAA | GAT | 2 | A | C |
| TCGA-61-1910 | EHD4       | ENST00000220325 | p.I168L  | c.502A>C   | Unverified | CGC | ATC | AGC | 1 | A | C |
| TCGA-23-1123 | ENSG00000: | ENST00000157775 | p.Q157P  | c.470A>C   | Verified   | GCG | CAG | CCC | 2 | A | C |
| TCGA-23-1123 | ENSG00000: | ENST00000157775 | p.Q157P  | c.470A>C   | Verified   | GCG | CAG | CCC | 2 | A | C |
| TCGA-23-1117 | ENSG00000: | ENST00000322049 | p.A249A  | c.747A>C   | Verified   | TGT | GCA | GTC | 3 | A | C |
| TCGA-23-1117 | ENSG00000: | ENST00000322049 | p.A249A  | c.747A>C   | Verified   | TGT | GCA | GTC | 3 | A | C |
| TCGA-30-1855 | ENSG00000: | ENST00000439556 | p.Q307P  | c.920A>C   | Unverified | AAG | CAA | TGT | 2 | A | C |
| TCGA-09-2056 | EP400      | ENST00000389561 | p.H1938P | c.5813A>C  | Verified   | ACT | CAC | AGC | 2 | A | C |
| TCGA-25-1326 | EPC1       | ENST00000263062 | p.H732P  | c.2195A>C  | Verified   | TCC | CAC | AGT | 2 | A | C |

|              |            |                     |          |            |            |     |     |     |   |   |   |
|--------------|------------|---------------------|----------|------------|------------|-----|-----|-----|---|---|---|
| TCGA-61-1904 | EPDR1      | ENST00000559325     | p.H97P   | c.290A>C   | Unverified | AGC | CAC | TCT | 2 | A | C |
| TCGA-23-2077 | EPHB2      | NM_017449           | p.A142A  | c.426A>C   | Unverified | att | gca | gcc | 3 | A | C |
| TCGA-25-1318 | EPHB3      | ENST00000330394     | p.I560L  | c.1678A>C  | Unverified | ctc | atc | gtg | 1 | A | C |
| TCGA-25-1318 | EPHB3      | ENST00000330394     | p.I560L  | c.1678A>C  | Unverified | ctc | atc | gtg | 1 | A | C |
| TCGA-29-1769 | ERC2       | ENST00000288221     | p.Q939P  | c.2816A>C  | Unverified | TCG | CAA | CAT | 2 | A | C |
| TCGA-29-1769 | ERC2_ENST0 | ENST00000288221     | p.Q939P  | c.2816A>C  | Unverified | TCG | CAA | CAT | 2 | A | C |
| TCGA-04-1338 | ERCC6L     | ENST00000334463     | p.Q1246P | c.3737A>C  | Verified   | AAG | CAA | CTT | 2 | A | C |
| TCGA-13-0762 | EXDL2      | ENST00000409014     | p.D148A  | c.443A>C   | Verified   | GAT | GAC | CAC | 2 | A | C |
| TCGA-13-0762 | EXDL2      | ENST00000409014     | p.D148A  | c.443A>C   | Verified   | GAT | GAC | CAC | 2 | A | C |
| TCGA-29-1764 | EYS        | ENST00000342421     | p.T363T  | c.1089A>C  | Unverified | ttt | aca | gat | 3 | A | C |
| TCGA-29-1764 | EYS_ENST00 | ENST00000370621     | p.T363T  | c.1089A>C  | Unverified | TTT | ACA | GAT | 3 | A | C |
| TCGA-29-1703 | FAM111A    | ENST00000528737     | p.K315Q  | c.943A>C   | Unverified | TTC | AAG | AAA | 1 | A | C |
| TCGA-23-1123 | FAM171B    | ENST00000304698     | p.H762P  | c.2285A>C  | Verified   | AGG | CAC | ATC | 2 | A | C |
| TCGA-23-1123 | FAM171B    | ENST00000304698     | p.H762P  | c.2285A>C  | Verified   | AGG | CAC | ATC | 2 | A | C |
| TCGA-24-1422 | FAM53B     | ENST00000337318     | p.T249T  | c.747A>C   | Unverified | AGC | ACA | CCT | 3 | A | C |
| TCGA-13-0923 | FARSB      | ENST00000281828     | p.N503H  | c.1507A>C  | Verified   | TAC | AAC | AAG | 1 | A | C |
| TCGA-24-1843 | FAT2       | ENST00000261800     | p.I1404L | c.4210A>C  | Unverified | GTC | ATT | GCC | 1 | A | C |
| TCGA-24-1843 | FAT3_ENSTC | ENST00000298047_v61 | p.K3860Q | c.11578A>C | Unverified | TTC | AAA | CTA | 1 | A | C |
| TCGA-24-1843 | FAT3_ENSTC | ENST00000409404     | p.K3860Q | c.11578A>C | Unverified | TTC | AAA | CTA | 1 | A | C |
| TCGA-13-0755 | FLG        | ENST00000368799     | p.R3483S | c.10449A>C | Verified   | TCC | AGA | AGT | 3 | A | C |
| TCGA-61-2113 | FLG        | ENST00000368799     | p.S522S  | c.1566A>C  | Verified   | GGG | TCA | AGC | 3 | A | C |
| TCGA-13-1507 | FLG2       | ENST00000388718     | p.Q1859P | c.5576A>C  | Verified   | TCT | CAA | TCT | 2 | A | C |
| TCGA-13-1510 | FLVCR1     | ENST00000366971     | p.D266A  | c.797A>C   | Unverified | AAT | GAC | ACA | 2 | A | C |
| TCGA-13-0903 | FOS        | ENST00000303562     | p.N245H  | c.733A>C   | Verified   | CTC | AAT | GAC | 1 | A | C |
| TCGA-23-1110 | FOXA2      | ENST00000377115     | p.N38H   | c.112A>C   | Verified   | atg | aac | ggc | 1 | A | C |
| TCGA-30-1857 | FOXM1      | ENST00000342628     | p.G194G  | c.582A>C   | Unverified | GAT | GGA | CTG | 3 | A | C |
| TCGA-30-1857 | FOXP2      | ENST00000408937     | p.H584P  | c.1751A>C  | Unverified | CTG | CAC | AAG | 2 | A | C |
| TCGA-23-1117 | GABPA      | ENST00000354828     | p.Q97P   | c.290A>C   | Verified   | gta | cag | gta | 2 | A | C |
| TCGA-23-1117 | GABPA      | ENST00000354828     | p.Q97P   | c.290A>C   | Verified   | gta | cag | gta | 2 | A | C |
| TCGA-29-1785 | GCN1L1     | ENST00000300648     | p.R2168R | c.6502A>C  | Unverified | ATG | AGG | CAA | 1 | A | C |
| TCGA-29-1785 | GCN1L1     | ENST00000300648     | p.R2168R | c.6502A>C  | Unverified | ATG | AGG | CAA | 1 | A | C |
| TCGA-20-0990 | GDPD2      | ENST00000374382     | p.T240P  | c.718A>C   | Verified   | AAC | ACC | CTG | 1 | A | C |
| TCGA-20-1685 | GLB1L2     | ENST00000339772     | p.R482R  | c.1444A>C  | Unverified | CTG | AGG | ATC | 1 | A | C |
| TCGA-13-1488 | GLYATL1    | ENST00000300079     | p.R47R   | c.139A>C   | Verified   | CTG | AGG | ATA | 1 | A | C |

|              |             |                 |          |           |            |     |     |     |   |   |   |
|--------------|-------------|-----------------|----------|-----------|------------|-----|-----|-----|---|---|---|
| TCGA-25-2391 | GNAT1       | ENST00000232461 | p.K47Q   | c.139A>C  | Unverified | gtc | aag | cag | 1 | A | C |
| TCGA-04-1337 | GNPAT       | ENST00000366647 | p.R270S  | c.810A>C  | Verified   | AAA | AGA | GAA | 3 | A | C |
| TCGA-09-2049 | GOLGB1      | ENST00000340645 | p.Q1074P | c.3221A>C | Verified   | CTA | CAG | CAT | 2 | A | C |
| TCGA-29-1761 | GOLGB1      | ENST00000340645 | p.E2230A | c.6689A>C | Unverified | AAA | GAA | GAT | 2 | A | C |
| TCGA-30-1718 | GPR174      | ENST00000276077 | p.T329T  | c.987A>C  | Unverified | atg | aca | cct | 3 | A | C |
| TCGA-30-1856 | GPR32       | ENST00000270590 | p.T332P  | c.994A>C  | Unverified | TTG | ACT | TCT | 1 | A | C |
| TCGA-61-2109 | GPRIN3      | ENST00000333209 | p.K310Q  | c.928A>C  | Unverified | ATC | AAG | GAA | 1 | A | C |
| TCGA-20-0990 | GPX6        | ENST00000361902 | p.Q26P   | c.77A>C   | Verified   | CCT | CAA | AAT | 2 | A | C |
| TCGA-29-1775 | GRIA2       | ENST00000296526 | p.S154R  | c.460A>C  | Unverified | GAC | AGT | GAC | 1 | A | C |
| TCGA-29-1775 | GRIA2_ENST  | ENST00000264426 | p.S154R  | c.460A>C  | Unverified | GAC | AGT | GAC | 1 | A | C |
| TCGA-04-1651 | GRM7        | ENST00000389335 | p.R744R  | c.2230A>C | Unverified | GCC | AGA | GGG | 1 | A | C |
| TCGA-04-1651 | GRM7        | ENST00000389335 | p.R744R  | c.2230A>C | Unverified | GCC | AGA | GGG | 1 | A | C |
| TCGA-09-0369 | HENMT1      | ENST00000370032 | p.N105H  | c.313A>C  | Verified   | CTG | AAT | TTG | 1 | A | C |
| TCGA-09-0369 | HENMT1      | ENST00000370032 | p.N105H  | c.313A>C  | Verified   | CTG | AAT | TTG | 1 | A | C |
| TCGA-13-0755 | HERC1       | ENST00000443617 | p.A2669A | c.8007A>C | Verified   | CCT | GCA | TCC | 3 | A | C |
| TCGA-24-1417 | HIVEP1      | ENST00000379388 | p.A2345A | c.7035A>C | Unverified | ACA | GCA | GCG | 3 | A | C |
| TCGA-29-1775 | HLA-E       | ENST00000376630 | p.D217A  | c.650A>C  | Unverified | TCT | GAC | CAT | 2 | A | C |
| TCGA-29-2427 | HLA-G       | ENST00000360323 | p.Q300P  | c.899A>C  | Verified   | AAG | CAG | TCT | 2 | A | C |
| TCGA-04-1356 | HMCN1       | ENST00000271588 | p.T192T  | c.576A>C  | Verified   | TCT | ACA | AGT | 3 | A | C |
| TCGA-13-1496 | HOXC6       | ENST00000243108 | p.I147L  | c.439A>C  | Verified   | CAG | ATC | TAC | 1 | A | C |
| TCGA-13-1512 | HOXC8       | ENST00000040584 | p.K241Q  | c.721A>C  | Verified   | AAC | AAG | GAC | 1 | A | C |
| TCGA-24-2035 | HS3ST3A1    | ENST00000284110 | p.T236P  | c.706A>C  | Verified   | GAC | ACC | AAG | 1 | A | C |
| TCGA-20-0991 | IDE         | ENST00000265986 | p.D698A  | c.2093A>C | Verified   | AAA | GAT | GAG | 2 | A | C |
| TCGA-04-1530 | IDI2        | ENST00000277517 | p.Q113P  | c.338A>C  | Unverified | CTG | CAA | GCA | 2 | A | C |
| TCGA-23-1122 | IFT140      | ENST00000426508 | p.A363A  | c.1089A>C | Verified   | GGG | GCA | GAG | 3 | A | C |
| TCGA-23-1117 | IL1RAPL1    | ENST00000378993 | p.E312A  | c.935A>C  | Verified   | GGG | GAA | CAG | 2 | A | C |
| TCGA-23-1117 | IL1RAPL1    | ENST00000378993 | p.E312A  | c.935A>C  | Verified   | GGG | GAA | CAG | 2 | A | C |
| TCGA-29-1698 | IL1RAPL1    | ENST00000378993 | p.H350P  | c.1049A>C | Unverified | CTT | CAT | AAA | 2 | A | C |
| TCGA-29-1698 | IL1RAPL1_EI | ENST00000378993 | p.H350P  | c.1049A>C | Unverified | CTT | CAT | AAA | 2 | A | C |
| TCGA-23-1022 | INA         | ENST00000369849 | p.S433R  | c.1297A>C | Verified   | CTC | AGT | GCT | 1 | A | C |
| TCGA-04-1342 | IRGQ        | ENST00000422989 | p.T286P  | c.856A>C  | Unverified | GCC | ACC | ACC | 1 | A | C |
| TCGA-23-1118 | ITGAX       | ENST00000268296 | p.K535Q  | c.1603A>C | Verified   | gac | aag | ctg | 1 | A | C |
| TCGA-13-1498 | ITGB2       | ENST00000397852 | p.I60L   | c.178A>C  | Verified   | TCC | ATT | CGC | 1 | A | C |
| TCGA-23-1022 | ITK         | ENST00000422843 | p.D202A  | c.605A>C  | Verified   | CTG | GAC | AGT | 2 | A | C |

|              |            |                 |          |           |            |     |     |     |   |   |   |
|--------------|------------|-----------------|----------|-----------|------------|-----|-----|-----|---|---|---|
| TCGA-13-1488 | ITPR1      | ENST00000456211 | p.R728R  | c.2182A>C | Verified   | GCG | AGG | ATG | 1 | A | C |
| TCGA-04-1361 | ITPR2      | ENST00000381340 | p.T2334P | c.7000A>C | Verified   | TTC | ACC | CGT | 1 | A | C |
| TCGA-04-1361 | ITPR2      | ENST00000381340 | p.T2334P | c.7000A>C | Verified   | TTC | ACC | CGT | 1 | A | C |
| TCGA-04-1362 | IVL        | ENST00000368764 | p.E102A  | c.305A>C  | Verified   | GCA | GAA | AAC | 2 | A | C |
| TCGA-09-2049 | KCMF1      | ENST00000409785 | p.A314A  | c.942A>C  | Verified   | CGT | GCA | GAC | 3 | A | C |
| TCGA-23-1111 | KCND2      | ENST00000331113 | p.P378P  | c.1134A>C | Unverified | GTG | CCA | AAA | 3 | A | C |
| TCGA-61-1913 | KDELC2     | ENST00000323468 | p.K500Q  | c.1498A>C | Unverified | AGG | AAA | AAG | 1 | A | C |
| TCGA-24-1417 | KDM2A      | ENST00000529006 | p.I794L  | c.2380A>C | Unverified | aag | atc | cgg | 1 | A | C |
| TCGA-61-2009 | KIAA1324L  | ENST00000297222 | p.T124T  | c.372A>C  | Verified   | AAG | ACA | CAG | 3 | A | C |
| TCGA-61-1725 | KIAA1407   | ENST00000295878 | p.Q820P  | c.2459A>C | Unverified | CTA | CAG | TAC | 2 | A | C |
| TCGA-04-1655 | KIF27      | ENST00000297814 | p.A338A  | c.1014A>C | Unverified | AGA | GCA | CGG | 3 | A | C |
| TCGA-24-1470 | KIF3C      | ENST00000264712 | p.N210H  | c.628A>C  | Verified   | ATG | AAT | GAG | 1 | A | C |
| TCGA-09-2049 | KIFC2      | ENST00000301332 | p.P418P  | c.1254A>C | Verified   | AGG | CCA | GGG | 3 | A | C |
| TCGA-23-1022 | KLHL34     | ENST00000379499 | p.K580Q  | c.1738A>C | Verified   | CTC | AAG | TGG | 1 | A | C |
| TCGA-61-1740 | KPNA5      | ENST00000368564 | p.P351P  | c.1053A>C | Unverified | agc | cca | aag | 3 | A | C |
| TCGA-29-1766 | KRTAP10-10 | ENST00000380095 | p.D83A   | c.248A>C  | Unverified | CCG | GAT | TGC | 2 | A | C |
| TCGA-04-1336 | KRTAP13-3  | ENST00000390690 | p.M87L   | c.259A>C  | Verified   | CAC | ATG | CTC | 1 | A | C |
| TCGA-09-2056 | L3MBTL2    | ENST00000216237 | p.Q625P  | c.1874A>C | Unverified | AAA | CAG | TTT | 2 | A | C |
| TCGA-29-1784 | LCTL       | ENST00000341509 | p.K129Q  | c.385A>C  | Unverified | AAC | AAG | AAG | 1 | A | C |
| TCGA-25-2392 | LIMCH1     | ENST00000313860 | p.N1066H | c.3196A>C | Verified   | CTG | AAC | TGT | 1 | A | C |
| TCGA-29-1781 | LMBRD2     | ENST00000296603 | p.G681G  | c.2043A>C | Unverified | GGT | GGA | CGA | 3 | A | C |
| TCGA-25-2401 | LPAR6      | ENST00000345941 | p.A149A  | c.447A>C  | Verified   | AGT | GCA | CCC | 3 | A | C |
| TCGA-61-2102 | LRBA       | ENST00000357115 | p.H2304P | c.6911A>C | Verified   | ACT | CAT | TAC | 2 | A | C |
| TCGA-61-1906 | LRCH1      | ENST00000389798 | p.H282P  | c.845A>C  | Unverified | GTT | CAC | ATA | 2 | A | C |
| TCGA-61-1906 | LRCH1      | ENST00000389798 | p.H282P  | c.845A>C  | Unverified | GTT | CAC | ATA | 2 | A | C |
| TCGA-61-1906 | LRCH1_ENST | ENST00000311191 | p.H282P  | c.845A>C  | Unverified | GTT | CAC | ATA | 2 | A | C |
| TCGA-61-1906 | LRCH1_ENST | ENST00000311191 | p.H282P  | c.845A>C  | Unverified | GTT | CAC | ATA | 2 | A | C |
| TCGA-29-1699 | LRRK2      | SU_LRRK2        | p.E1150A | c.3449A>C | Unverified | ctt | gag | gct | 2 | A | C |
| TCGA-29-1699 | LRRK2_ENST | ENST00000298910 | p.E1150A | c.3449A>C | Unverified | CTT | GAG | GCT | 2 | A | C |
| TCGA-13-0900 | LRRN3      | ENST00000308478 | p.N150H  | c.448A>C  | Verified   | CAC | AAC | TTG | 1 | A | C |
| TCGA-61-1895 | LUZP1      | ENST00000374623 | p.S472S  | c.1416A>C | Unverified | CCC | TCA | GTG | 3 | A | C |
| TCGA-29-1691 | LYAR       | ENST00000343470 | p.A8A    | c.24A>C   | Unverified | AAT | GCA | TGT | 3 | A | C |
| TCGA-09-2050 | MAGI2      | ENST00000354212 | p.T137P  | c.409A>C  | Verified   | CGC | ACG | GTG | 1 | A | C |
| TCGA-29-1769 | MAP2       | ENST00000360351 | p.R599S  | c.1797A>C | Unverified | ACT | AGA | GAA | 3 | A | C |

|              |            |                 |          |           |            |     |     |     |   |   |   |
|--------------|------------|-----------------|----------|-----------|------------|-----|-----|-----|---|---|---|
| TCGA-23-1116 | MARS2      | ENST00000282276 | p.D357A  | c.1070A>C | Unverified | GTG | GAT | CCT | 2 | A | C |
| TCGA-61-2009 | MAST3      | SU_MAST3        | p.E352A  | c.1055A>C | Unverified | ctg | gag | gag | 2 | A | C |
| TCGA-13-1509 | MBD5       | ENST00000407073 | p.G1302G | c.3906A>C | Verified   | TTT | GGA | GAG | 3 | A | C |
| TCGA-24-2267 | MEFV       | ENST00000219596 | p.H739P  | c.2216A>C | Unverified | TCC | CAC | ATC | 2 | A | C |
| TCGA-61-1915 | MEI1       | ENST00000300398 | p.T864T  | c.2592A>C | Unverified | GAC | ACA | GCT | 3 | A | C |
| TCGA-13-0906 | MGA        | XM_031689.7     | p.Q2884P | c.8651A>C | Unverified | aat | caa | caa | 2 | A | C |
| TCGA-29-1768 | MGC42105   | ENST00000326035 | p.R120R  | c.360A>C  | Unverified | TCC | CGA | GAA | 3 | A | C |
| TCGA-24-1844 | MMP1       | ENST00000315274 | p.Q186P  | c.557A>C  | Unverified | TTT | CAA | CCA | 2 | A | C |
| TCGA-61-1914 | MRO        | ENST00000256425 | p.I131L  | c.391A>C  | Unverified | TTC | ATA | GAT | 1 | A | C |
| TCGA-61-1914 | MRO_ENST0  | ENST00000436348 | p.I145L  | c.433A>C  | Unverified | TTC | ATA | GAT | 1 | A | C |
| TCGA-29-1775 | MTAC2D1    | ENST00000360594 | p.S318S  | c.954A>C  | Unverified | TCA | TCA | ACA | 3 | A | C |
| TCGA-13-0884 | MXRA5      | ENST00000381114 | p.H87P   | c.260A>C  | Verified   | ATT | CAC | GGC | 2 | A | C |
| TCGA-13-1408 | MYBPC3     | ENST00000399249 | p.K812Q  | c.2434A>C | Unverified | AAG | AAG | AAG | 1 | A | C |
| TCGA-24-2280 | MYBPHL     | ENST00000357155 | p.Q124P  | c.371A>C  | Unverified | TAC | CAA | CTC | 2 | A | C |
| TCGA-24-1470 | MYCBP2     | NM_015057.1     | p.R1641S | c.4923A>C | Verified   | agg | aga | gaa | 3 | A | C |
| TCGA-29-1766 | MYH3       | ENST00000226209 | p.R1177R | c.3529A>C | Unverified | CGC | AGG | GAC | 1 | A | C |
| TCGA-61-2012 | MYO15A     | ENST00000205890 | p.T3122T | c.9366A>C | Verified   | ATC | ACA | GAC | 3 | A | C |
| TCGA-29-1693 | MYO5B      | ENST00000285039 | p.E1206A | c.3617A>C | Unverified | CTG | GAG | TCA | 2 | A | C |
| TCGA-13-1497 | NAP1L1     | ENST00000393263 | p.K276Q  | c.826A>C  | Verified   | AAG | AAG | CAG | 1 | A | C |
| TCGA-61-1904 | NARF       | NM_031968.1     | p.H413P  | c.1238A>C | Unverified | ttc | cac | ttt | 2 | A | C |
| TCGA-24-1850 | NBAS       | ENST00000281513 | p.P769P  | c.2307A>C | Unverified | TCT | CCA | CAT | 3 | A | C |
| TCGA-61-1904 | NCKAP5L_EI | ENST00000335999 | p.T29P   | c.85A>C   | Unverified | GGC | ACC | TGC | 1 | A | C |
| TCGA-04-1331 | NCOA7      | ENST00000368357 | p.T705T  | c.2115A>C | Verified   | TAC | ACA | TTC | 3 | A | C |
| TCGA-13-1499 | NEB        | ENST00000409198 | p.H2207P | c.6620A>C | Verified   | CAG | CAC | CCG | 2 | A | C |
| TCGA-30-1855 | NEDD4      | ENST00000338963 | p.Q92P   | c.275A>C  | Unverified | CTA | CAG | CCA | 2 | A | C |
| TCGA-61-1740 | NF1        | ENST00000358273 | p.T1730P | c.5188A>C | Unverified | GCC | ACC | TTG | 1 | A | C |
| TCGA-61-1740 | NF1_ENST0C | ENST00000358273 | p.T1730P | c.5188A>C | Unverified | GCC | ACC | TTG | 1 | A | C |
| TCGA-24-1847 | NFS1       | ENST00000374092 | p.A311A  | c.933A>C  | Unverified | GTG | GCA | CAG | 3 | A | C |
| TCGA-24-2288 | NLRP13     | ENST00000342929 | p.Q115P  | c.344A>C  | Unverified | CTG | CAA | GAT | 2 | A | C |
| TCGA-24-2280 | NLRP8      | ENST00000291971 | p.I124L  | c.370A>C  | Unverified | GCC | ATT | CTG | 1 | A | C |
| TCGA-13-0760 | NOC2L      | ENST00000327044 | p.N565H  | c.1693A>C | Verified   | GCC | AAC | TAC | 1 | A | C |
| TCGA-13-1498 | NR5A2      | ENST00000367362 | p.N426H  | c.1276A>C | Verified   | aac | aac | ctc | 1 | A | C |
| TCGA-30-1856 | NRXN2      | ENST00000377551 | p.Q1108P | c.3323A>C | Unverified | aac | cag | ggc | 2 | A | C |
| TCGA-29-2427 | NTNG2      | ENST00000393229 | p.T105P  | c.313A>C  | Unverified | GCC | ACC | TAC | 1 | A | C |

|              |            |                     |          |             |            |     |     |     |   |   |   |
|--------------|------------|---------------------|----------|-------------|------------|-----|-----|-----|---|---|---|
| TCGA-13-1488 | NUF2       | ENST00000367900     | p.S86R   | c.256A>C    | Verified   | TTC | AGC | AAT | 1 | A | C |
| TCGA-13-0890 | NUP210L    | ENST00000368559     | p.Q935P  | c.2804A>C   | Verified   | GAG | CAG | GGT | 2 | A | C |
| TCGA-20-0991 | OR13C8     | ENST00000335040     | p.T246T  | c.738A>C    | Verified   | CTG | ACA | GTG | 3 | A | C |
| TCGA-61-1740 | OR1A1      | ENST00000304094     | p.N84H   | c.250A>C    | Unverified | GCC | AAC | CAT | 1 | A | C |
| TCGA-23-1117 | OR51T1     | ENST00000380378     | p.A276A  | c.828A>C    | Verified   | TGT | GCA | GTC | 3 | A | C |
| TCGA-23-1117 | OR51T1     | ENST00000380378     | p.A276A  | c.828A>C    | Verified   | TGT | GCA | GTC | 3 | A | C |
| TCGA-13-1481 | OSBPL1A    | ENST00000319481     | p.T285P  | c.853A>C    | Verified   | CTG | ACT | CAA | 1 | A | C |
| TCGA-29-1763 | OTOGL_ENS  | ENST00000458043_v65 | p.?      | c.1561-2A>C | Unverified | CAG | AAT | CTT | 1 | A | C |
| TCGA-23-1124 | OTX2       | ENST00000339475     | p.Q109P  | c.326A>C    | Verified   | cag | cag | aat | 2 | A | C |
| TCGA-04-1356 | P2RY11     | ENST00000321826     | p.Q304P  | c.911A>C    | Verified   | TAC | CAG | GTG | 2 | A | C |
| TCGA-29-1764 | PABPC1     | ENST00000318607     | p.N394H  | c.1180A>C   | Unverified | CCC | AAC | CCT | 1 | A | C |
| TCGA-25-2392 | PABPC1L    | ENST00000217073     | p.Q292P  | c.875A>C    | Verified   | TAC | CAG | GGT | 2 | A | C |
| TCGA-29-1764 | PAK1       | ENST00000356341     | p.A412A  | c.1236A>C   | Unverified | TGT | GCA | CAG | 3 | A | C |
| TCGA-29-1764 | PAK1_ENST  | ENST00000278568     | p.A412A  | c.1236A>C   | Unverified | TGT | GCA | CAG | 3 | A | C |
| TCGA-20-0991 | PANK4      | ENST00000378466     | p.D174A  | c.521A>C    | Verified   | TCC | GAC | CCT | 2 | A | C |
| TCGA-13-0893 | PARP2      | NM_005484.2         | p.D133A  | c.398A>C    | Verified   | ctt | gac | aaa | 2 | A | C |
| TCGA-13-0905 | PCNT       | ENST00000359568     | p.H855P  | c.2564A>C   | Verified   | CTC | CAC | GTG | 2 | A | C |
| TCGA-24-1103 | PDE8A      | ENST00000310298     | p.E746A  | c.2237A>C   | Verified   | TCG | GAA | GAA | 2 | A | C |
| TCGA-04-1361 | PFKFB1     | ENST00000375006     | p.P3P    | c.9A>C      | Verified   | TCT | CCA | GAG | 3 | A | C |
| TCGA-04-1361 | PFKFB1     | ENST00000375006     | p.P3P    | c.9A>C      | Verified   | TCT | CCA | GAG | 3 | A | C |
| TCGA-04-1347 | PHC3       | NM_024947.2         | p.Q337P  | c.1010A>C   | Verified   | ctc | cag | aac | 2 | A | C |
| TCGA-13-0890 | PHF21B     | ENST00000313237     | p.D89A   | c.266A>C    | Verified   | CGG | GAC | CGG | 2 | A | C |
| TCGA-30-1855 | PIK3R1     | ENST00000521381     | p.P717P  | c.2151A>C   | Unverified | tac | cca | gta | 3 | A | C |
| TCGA-30-1855 | PIK3R1_ENS | ENST00000320694     | p.P417P  | c.1251A>C   | Unverified | TAC | CCA | GTA | 3 | A | C |
| TCGA-30-1855 | PIK3R1_ENS | ENST00000336483     | p.P447P  | c.1341A>C   | Unverified | TAC | CCA | GTA | 3 | A | C |
| TCGA-13-0760 | PIK3R4     | ENST00000356763     | p.E1094A | c.3281A>C   | Verified   | aag | gag | gac | 2 | A | C |
| TCGA-25-2393 | PIWIL1     | ENST00000245255     | p.S660S  | c.1980A>C   | Verified   | TTC | TCA | CGC | 3 | A | C |
| TCGA-61-1907 | PKHD1      | ENST00000371117     | p.K1072Q | c.3214A>C   | Unverified | TGC | AAA | GTT | 1 | A | C |
| TCGA-61-1907 | PKHD1_ENS  | ENST00000340994     | p.K1072Q | c.3214A>C   | Unverified | TGC | AAA | GTT | 1 | A | C |
| TCGA-13-0793 | PKIA       | ENST00000352966     | p.T17T   | c.51A>C     | Verified   | AGA | ACA | GGT | 3 | A | C |
| TCGA-24-0979 | PLD5       | ENST00000366545     | p.A382A  | c.1146A>C   | Verified   | CAG | GCA | GAT | 3 | A | C |
| TCGA-09-1674 | PMEL       | ENST00000552882     | p.S36S   | c.108A>C    | Unverified | GTC | TCA | AGG | 3 | A | C |
| TCGA-04-1356 | PODN       | ENST00000312553     | p.N197H  | c.589A>C    | Unverified | CTC | AAT | TAC | 1 | A | C |
| TCGA-04-1356 | PPAN-P2RY1 | ENST00000393796     | p.Q724P  | c.2171A>C   | Verified   | TAC | CAG | GTG | 2 | A | C |



|              |            |                 |          |           |            |     |     |     |   |   |   |
|--------------|------------|-----------------|----------|-----------|------------|-----|-----|-----|---|---|---|
| TCGA-24-1843 | PPP3CA     | ENST00000394854 | p.K399Q  | c.1195A>C | Unverified | aac | aag | atc | 1 | A | C |
| TCGA-24-1845 | PRG4       | ENST00000445192 | p.T401P  | c.1201A>C | Unverified | ACC | ACC | AAG | 1 | A | C |
| TCGA-13-0887 | PRKCE      | ENST00000306156 | p.Q197P  | c.590A>C  | Verified   | AAG | CAG | GGA | 2 | A | C |
| TCGA-13-0792 | PRKCZ_ENST | ENST00000378567 | p.D251A  | c.752A>C  | Unverified | CAG | GAC | TTT | 2 | A | C |
| TCGA-25-2401 | PROC       | ENST00000234071 | p.Q3P    | c.8A>C    | Unverified | TGG | CAG | CTC | 2 | A | C |
| TCGA-04-1331 | PSMA4      | ENST00000044462 | p.D57A   | c.170A>C  | Unverified | CTT | GAT | GAA | 2 | A | C |
| TCGA-10-0930 | PSMC3      | ENST00000298852 | p.N207H  | c.619A>C  | Verified   | ATG | AAC | CAC | 1 | A | C |
| TCGA-10-0930 | PSMC3      | ENST00000298852 | p.N207H  | c.619A>C  | Verified   | ATG | AAC | CAC | 1 | A | C |
| TCGA-04-1337 | PTPN12     | ENST00000248594 | p.D26A   | c.77A>C   | Unverified | GAG | GAC | AAC | 2 | A | C |
| TCGA-29-1761 | Q8NH32_HL  | ENST00000321415 | p.I13L   | c.37A>C   | Unverified | ATC | ATC | CTG | 1 | A | C |
| TCGA-29-1763 | RAP1GAP    | ENST00000374765 | p.P29P   | c.87A>C   | Unverified | ATT | CCA | TAC | 3 | A | C |
| TCGA-29-1763 | RAP1GAP_E  | ENST00000374757 | p.P171P  | c.513A>C  | Unverified | ATT | CCA | TAC | 3 | A | C |
| TCGA-29-1763 | RAP1GAP_E  | ENST00000374761 | p.P60P   | c.180A>C  | Unverified | ATT | CCA | TAC | 3 | A | C |
| TCGA-13-0793 | RBM12B     | ENST00000399300 | p.P670P  | c.2010A>C | Unverified | CGG | CCA | CCT | 3 | A | C |
| TCGA-13-1499 | RBM26      | ENST00000267229 | p.S487S  | c.1461A>C | Verified   | GAC | TCA | GAA | 3 | A | C |
| TCGA-29-1781 | RECQL      | ENST00000444129 | p.P126P  | c.378A>C  | Unverified | TTA | CCA | GCA | 3 | A | C |
| TCGA-29-1775 | RIMS1      | ENST00000521978 | p.Q943P  | c.2828A>C | Unverified | GAA | CAG | CAA | 2 | A | C |
| TCGA-13-0887 | RIOK3      | ENST00000339486 | p.K456Q  | c.1366A>C | Verified   | GTC | AAG | GAA | 1 | A | C |
| TCGA-61-1907 | RIT2       | ENST00000326695 | p.G30G   | c.90A>C   | Unverified | ggg | gga | gtt | 3 | A | C |
| TCGA-09-2049 | RNASE7     | ENST00000298690 | p.N127H  | c.379A>C  | Verified   | CAG | AAC | AAG | 1 | A | C |
| TCGA-23-1031 | RPL10      | ENST00000369817 | p.M184L  | c.550A>C  | Unverified | GAC | ATG | GTG | 1 | A | C |
| TCGA-29-1693 | RSPH1      | ENST00000291536 | p.G87G   | c.261A>C  | Unverified | gat | gga | tcc | 3 | A | C |
| TCGA-20-1683 | SCG2       | ENST00000305409 | p.S555R  | c.1663A>C | Unverified | GGC | AGC | TCT | 1 | A | C |
| TCGA-09-2051 | SEC16A     | ENST00000313050 | p.G2115G | c.6345A>C | Unverified | CCT | GGA | AAG | 3 | A | C |
| TCGA-24-1847 | SEC23B     | ENST00000377465 | p.I744L  | c.2230A>C | Unverified | CCC | ATC | CTA | 1 | A | C |
| TCGA-61-2012 | SERPINB4   | ENST00000341074 | p.Q52P   | c.155A>C  | Verified   | caa | caa | att | 2 | A | C |
| TCGA-25-2392 | SH2B1      | ENST00000337120 | p.E349A  | c.1046A>C | Verified   | GTG | GAA | GGT | 2 | A | C |
| TCGA-29-1696 | SLC10A1    | ENST00000216540 | p.K177Q  | c.529A>C  | Unverified | CTC | AAA | TCC | 1 | A | C |
| TCGA-29-1696 | SLC10A1    | ENST00000216540 | p.K177Q  | c.529A>C  | Unverified | CTC | AAA | TCC | 1 | A | C |
| TCGA-13-0887 | SLC12A8_EN | ENST00000393469 | p.M33L   | c.97A>C   | Verified   | TTC | ATG | TGG | 1 | A | C |
| TCGA-04-1542 | SLC5A7     | ENST00000264047 | p.S297S  | c.891A>C  | Verified   | GCA | TCA | ACA | 3 | A | C |
| TCGA-23-1021 | SLC9A7     | ENST00000328306 | p.T312P  | c.934A>C  | Verified   | aac | act | cac | 1 | A | C |
| TCGA-25-1313 | SLC9A9     | ENST00000316549 | p.I589L  | c.1765A>C | Verified   | gcc | ata | aat | 1 | A | C |
| TCGA-04-1651 | SON        | ENST00000356577 | p.I8L    | c.22A>C   | Unverified | CAG | ATT | TTT | 1 | A | C |

|              |                        |                 |          |            |            |     |     |     |   |   |   |
|--------------|------------------------|-----------------|----------|------------|------------|-----|-----|-----|---|---|---|
| TCGA-04-1651 | SON                    | ENST00000356577 | p.I8L    | c.22A>C    | Unverified | CAG | ATT | TTT | 1 | A | C |
| TCGA-04-1651 | SON_ENST00000300278    | ENST00000300278 | p.I8L    | c.22A>C    | Unverified | CAG | ATT | TTT | 1 | A | C |
| TCGA-04-1651 | SON_ENST00000300278    | ENST00000300278 | p.I8L    | c.22A>C    | Unverified | CAG | ATT | TTT | 1 | A | C |
| TCGA-24-1104 | SOX6                   | ENST00000316399 | p.R93R   | c.279A>C   | Verified   | TTC | CGA | AAT | 3 | A | C |
| TCGA-13-0762 | SPATA13                | ENST00000382095 | p.T378P  | c.1132A>C  | Verified   | ctc | aca | cca | 1 | A | C |
| TCGA-13-0762 | SPATA13                | ENST00000382095 | p.T378P  | c.1132A>C  | Verified   | ctc | aca | cca | 1 | A | C |
| TCGA-24-1422 | SPATA2                 | ENST00000289431 | p.N504H  | c.1510A>C  | Unverified | CCC | AAC | AAC | 1 | A | C |
| TCGA-20-0990 | SPG11                  | ENST00000261866 | p.K604Q  | c.1810A>C  | Verified   | AGC | AAA | CAC | 1 | A | C |
| TCGA-29-1770 | SPG11                  | ENST00000261866 | p.Q1400P | c.4199A>C  | Unverified | ATT | CAA | GAC | 2 | A | C |
| TCGA-30-1714 | SPHAR                  | ENST00000366688 | p.N51H   | c.151A>C   | Unverified | TTC | AAT | GTC | 1 | A | C |
| TCGA-13-0760 | SPOCK1                 | ENST00000394945 | p.K201Q  | c.601A>C   | Verified   | GAC | AAG | GAG | 1 | A | C |
| TCGA-29-1761 | SPTBN1_ENST00000333896 | ENST00000333896 | p.Q20P   | c.59A>C    | Unverified | GGG | CAG | GTG | 2 | A | C |
| TCGA-13-0906 | SRP72                  | ENST00000342756 | p.A392A  | c.1176A>C  | Verified   | AAA | GCA | TGT | 3 | A | C |
| TCGA-13-0760 | ST14                   | ENST00000278742 | p.H656P  | c.1967A>C  | Verified   | GCA | CAC | TGC | 2 | A | C |
| TCGA-29-1781 | STARD3                 | ENST00000336308 | p.D48A   | c.143A>C   | Unverified | TCT | GAT | GTC | 2 | A | C |
| TCGA-61-1740 | STOX2                  | ENST00000308497 | p.G702G  | c.2106A>C  | Unverified | GAC | ACA | CTG | 3 | A | C |
| TCGA-61-1740 | STOX2_ENST00000308497  | ENST00000308497 | p.G678G  | c.2034A>C  | Unverified | AAC | GGA | CGC | 3 | A | C |
| TCGA-20-0991 | SUN2                   | ENST00000405510 | p.T192P  | c.574A>C   | Unverified | CTG | ACC | ACA | 1 | A | C |
| TCGA-24-1563 | SV2A                   | ENST00000369146 | p.S393S  | c.1179A>C  | Verified   | TTC | TCA | GTA | 3 | A | C |
| TCGA-04-1362 | SVEP1                  | ENST00000401783 | p.A2939A | c.8817A>C  | Verified   | GAT | GCA | GAG | 3 | A | C |
| TCGA-25-2398 | SYNE2                  | ENST00000358025 | p.Q6731P | c.20192A>C | Verified   | ATG | CAA | CTG | 2 | A | C |
| TCGA-24-1846 | TAS2R7                 | ENST00000240687 | p.R164R  | c.490A>C   | Unverified | AAG | AGG | AAA | 1 | A | C |
| TCGA-29-1775 | TC2N                   | ENST00000340892 | p.S382S  | c.1146A>C  | Unverified | TCA | TCA | ACA | 3 | A | C |
| TCGA-25-2042 | TCF21                  | ENST00000237316 | p.Q80P   | c.239A>C   | Unverified | GTC | CAG | CGC | 2 | A | C |
| TCGA-25-2042 | TGM2                   | ENST00000361475 | p.Q69P   | c.206A>C   | Unverified | AGC | CAG | GAG | 2 | A | C |
| TCGA-61-1913 | TLL2                   | ENST00000357947 | p.H833P  | c.2498A>C  | Unverified | GAC | CAC | CTG | 2 | A | C |
| TCGA-09-1674 | TMEM182                | ENST00000412401 | p.A109A  | c.327A>C   | Unverified | TCT | GCA | GTT | 3 | A | C |
| TCGA-04-1338 | TMEM33                 | ENST00000504986 | p.Q234P  | c.701A>C   | Verified   | CTC | CAG | AGC | 2 | A | C |
| TCGA-24-2267 | TNFAIP8                | ENST00000504771 | p.E100A  | c.299A>C   | Verified   | ATG | GAG | AAA | 2 | A | C |
| TCGA-23-1124 | TNS3                   | ENST00000311160 | p.K284Q  | c.850A>C   | Verified   | AGC | AAA | GAT | 1 | A | C |
| TCGA-13-0905 | TRAF3IP2               | ENST00000368761 | p.D205A  | c.614A>C   | Verified   | CAG | GAT | GTC | 2 | A | C |
| TCGA-61-2095 | TREH                   | ENST00000264029 | p.N334H  | c.1000A>C  | Unverified | CCC | AAC | TCG | 1 | A | C |
| TCGA-13-1512 | TRIM26                 | ENST00000453195 | p.K225Q  | c.673A>C   | Verified   | TTC | AAG | AGC | 1 | A | C |
| TCGA-29-1691 | TRIM55                 | ENST00000315962 | p.H90P   | c.269A>C   | Unverified | aga | cat | ggg | 2 | A | C |

|              |           |                 |           |             |            |     |     |     |   |   |   |
|--------------|-----------|-----------------|-----------|-------------|------------|-----|-----|-----|---|---|---|
| TCGA-24-1846 | TRIOBP    | ENST00000407319 | p.T422P   | c.1264A>C   | Unverified | GTC | ACC | CCG | 1 | A | C |
| TCGA-13-0923 | TRIP11    | ENST00000267622 | p.E539A   | c.1616A>C   | Verified   | GAT | GAA | AAA | 2 | A | C |
| TCGA-23-2078 | TRPC4     | ENST00000379705 | p.D841A   | c.2522A>C   | Unverified | ACC | GAT | ATC | 2 | A | C |
| TCGA-20-1683 | TRRAP     | ENST00000355540 | p.R210R   | c.630A>C    | Unverified | ACT | CGA | ACA | 3 | A | C |
| TCGA-20-1683 | TRRAP_ENS | ENST00000359863 | p.R210R   | c.630A>C    | Unverified | ACT | CGA | ACA | 3 | A | C |
| TCGA-10-0930 | TSGA13    | ENST00000356588 | p.S14S    | c.42A>C     | Verified   | AAA | TCA | AAG | 3 | A | C |
| TCGA-10-0930 | TSGA13    | ENST00000356588 | p.S14S    | c.42A>C     | Verified   | AAA | TCA | AAG | 3 | A | C |
| TCGA-09-2051 | TTC15     | ENST00000382110 | p.T418P   | c.1252A>C   | Unverified | CTC | ACC | AGC | 1 | A | C |
| TCGA-61-1907 | TTC40     | ENST00000368586 | p.T2005P  | c.6013A>C   | Unverified | GCC | ACA | AAG | 1 | A | C |
| TCGA-23-1122 | TTN       | NM_003319       | p.H6291P  | c.18872A>C  | Verified   | aag | cac | atg | 2 | A | C |
| TCGA-24-1469 | TTN       | NM_003319       | p.G19553G | c.58659A>C  | Verified   | gaa | gga | tgt | 3 | A | C |
| TCGA-23-1122 | TTN_ENSTO | ENST00000356127 | p.H12788P | c.38363A>C  | Verified   | AAG | CAC | ATG | 2 | A | C |
| TCGA-24-1469 | TTN_ENSTO | ENST00000356127 | p.G26048G | c.78144A>C  | Verified   | GAA | GGA | TGT | 3 | A | C |
| TCGA-13-1507 | TUBGCP4   | ENST00000564079 | p.K402Q   | c.1204A>C   | Verified   | CAC | AAG | GTA | 1 | A | C |
| TCGA-24-1435 | TYR       | ENST00000263321 | p.D317A   | c.950A>C    | Verified   | GCT | GAT | GTA | 2 | A | C |
| TCGA-30-1714 | UBE2O     | ENST00000319380 | p.H648P   | c.1943A>C   | Unverified | GAC | CAC | CCT | 2 | A | C |
| TCGA-30-1714 | UBE2O_ENS | ENST00000319380 | p.H648P   | c.1943A>C   | Unverified | GAC | CAC | CCT | 2 | A | C |
| TCGA-13-1481 | UBR4      | ENST00000375254 | p.E2169A  | c.6506A>C   | Verified   | TCT | GAG | GTG | 2 | A | C |
| TCGA-24-2280 | UGT1A5    | ENST00000373414 | p.Q86P    | c.257A>C    | Unverified | ACC | CAG | GAC | 2 | A | C |
| TCGA-13-0885 | UNC13C    | ENST00000260323 | p.P722P   | c.2166A>C   | Verified   | TCT | CCA | TGC | 3 | A | C |
| TCGA-61-1907 | UROS      | ENST00000368786 | p.K7Q     | c.19A>C     | Unverified | CTG | AAG | GAT | 1 | A | C |
| TCGA-13-1496 | USP15     | NM_006313.1     | p.D653A   | c.1958A>C   | Verified   | gaa | gat | tca | 2 | A | C |
| TCGA-29-1775 | USP37     | ENST00000258399 | p.Q817P   | c.2450A>C   | Unverified | GCT | CAG | AGC | 2 | A | C |
| TCGA-61-1998 | VAV2      | ENST00000406606 | p.N369H   | c.1105A>C   | Unverified | ATC | AAT | GAA | 1 | A | C |
| TCGA-36-1577 | VLDLR     | ENST00000382100 | p.D145A   | c.434A>C    | Verified   | GAA | GAT | GAA | 2 | A | C |
| TCGA-24-1435 | VWA3B     | ENST00000477737 | p.A446A   | c.1338A>C   | Verified   | CAT | GCA | AAA | 3 | A | C |
| TCGA-29-1775 | WDR26     | ENST00000295024 | p.A115A   | c.345A>C    | Unverified | CAT | GCA | GAA | 3 | A | C |
| TCGA-29-1775 | WDR26_ENS | ENST00000414423 | p.A262A   | c.786A>C    | Unverified | CAT | GCA | GAA | 3 | A | C |
| TCGA-61-2008 | WDR27_ENS | ENST00000333572 | p.?       | c.1130-2A>C | Verified   | AAG | GAT | TTC | 2 | A | C |
| TCGA-61-2008 | WDR27_ENS | ENST00000333572 | p.?       | c.1130-2A>C | Verified   | AAG | GAT | TTC | 2 | A | C |
| TCGA-61-2008 | WDR27_ENS | ENST00000448612 | p.?       | c.1130-2A>C | Verified   | AAG | GAT | TTC | 2 | A | C |
| TCGA-25-2398 | WDR55     | ENST00000358337 | p.T272P   | c.814A>C    | Verified   | TCC | ACT | GAT | 1 | A | C |
| TCGA-20-0991 | WDR55     | ENST00000358337 | p.D2A     | c.5A>C      | Unverified | ATG | GAC | CGC | 2 | A | C |
| TCGA-09-0369 | WHSC1     | ENST00000382891 | p.R1334R  | c.4000A>C   | Verified   | GTC | AGA | AGC | 1 | A | C |

|              |            |                 |          |           |            |     |     |     |   |   |   |
|--------------|------------|-----------------|----------|-----------|------------|-----|-----|-----|---|---|---|
| TCGA-09-0369 | WHSC1      | ENST00000382891 | p.R1334R | c.4000A>C | Verified   | GTC | AGA | AGC | 1 | A | C |
| TCGA-61-1907 | WWC1       | ENST00000265293 | p.Q186P  | c.557A>C  | Unverified | CTG | CAG | TTC | 2 | A | C |
| TCGA-29-1691 | XPNPEP1    | ENST00000369680 | p.D594A  | c.1781A>C | Unverified | AGG | GAT | GTG | 2 | A | C |
| TCGA-29-1691 | XPNPEP1_EI | ENST00000502935 | p.D637A  | c.1910A>C | Unverified | AGG | GAT | GTG | 2 | A | C |
| TCGA-29-1693 | YEATS2     | ENST00000305135 | p.Q505P  | c.1514A>C | Unverified | AAG | CAG | CCG | 2 | A | C |
| TCGA-23-1110 | ZCCHC4     | ENST00000302874 | p.K167Q  | c.499A>C  | Verified   | AAC | AAG | AAG | 1 | A | C |
| TCGA-13-0884 | ZFHx4      | ENST00000521891 | p.N2629H | c.7885A>C | Verified   | TCC | AAT | CCT | 1 | A | C |
| TCGA-24-1847 | ZFPM2      | ENST00000407775 | p.R311R  | c.933A>C  | Unverified | GCT | CGA | GCT | 3 | A | C |
| TCGA-25-2392 | ZMYND12    | ENST00000372565 | p.I49L   | c.145A>C  | Verified   | AGC | ATC | CAT | 1 | A | C |
| TCGA-61-1737 | ZNF18      | ENST00000322748 | p.S172S  | c.516A>C  | Unverified | TCC | TCA | GGG | 3 | A | C |
| TCGA-09-1665 | ZNF211     | ENST00000240731 | p.I314L  | c.940A>C  | Verified   | TTC | ATT | ATA | 1 | A | C |
| TCGA-24-1846 | ZNF22      | ENST00000298299 | p.E171A  | c.512A>C  | Unverified | AGT | GAA | TGT | 2 | A | C |
| TCGA-23-1114 | ZNF224     | ENST00000336976 | p.I270L  | c.808A>C  | Unverified | TTC | ATT | CAC | 1 | A | C |
| TCGA-20-0990 | ZNF236     | ENST00000253159 | p.T87P   | c.259A>C  | Verified   | TGC | ACC | CAC | 1 | A | C |
| TCGA-04-1367 | ZNF503     | ENST00000372524 | p.G624G  | c.1872A>C | Verified   | ACC | GGA | CCG | 3 | A | C |
| TCGA-30-1855 | ZNF625     | ENST00000355738 | p.Q241P  | c.722A>C  | Unverified | AAG | CAA | TGT | 2 | A | C |
| TCGA-23-1022 | ZNF91_ENS1 | ENST00000300619 | p.E942A  | c.2825A>C | Verified   | GAA | GAA | TGT | 2 | A | C |
| TCGA-24-1474 | ZXDA       | ENST00000358697 | p.H320P  | c.959A>C  | Verified   | agg | cac | ctg | 2 | A | C |
| TCGA-04-1338 | A2M        | ENST00000318602 | p.Q1051H | c.3153A>C | Unverified | GCC | CAA | GCT | 3 | A | C |
| TCGA-61-1906 | ABCA10     | ENST00000269081 | p.K1113T | c.3338A>C | Unverified | AAT | AAA | ACC | 2 | A | C |
| TCGA-61-1906 | ABCA10     | ENST00000269081 | p.K1113T | c.3338A>C | Unverified | AAT | AAA | ACC | 2 | A | C |
| TCGA-23-1122 | ABCA6      | ENST00000284425 | p.Y271S  | c.812A>C  | Unverified | ATC | TAT | GCT | 2 | A | C |
| TCGA-61-1740 | ADAMTS6_E  | ENST00000381055 | p.Y662S  | c.1985A>C | Unverified | TTC | TAC | ACT | 2 | A | C |
| TCGA-04-1336 | ADAMTSL1   | NM_139238.1     | p.K193T  | c.578A>C  | Verified   | tat | aaa | tcc | 2 | A | C |
| TCGA-04-1336 | ADAMTSL1_  | ENST00000380548 | p.K193T  | c.578A>C  | Verified   | TAT | AAA | TCC | 2 | A | C |
| TCGA-24-1845 | AHR        | ENST00000242057 | p.K37T   | c.110A>C  | Unverified | tcc | aag | cgg | 2 | A | C |
| TCGA-23-1116 | ALS2CR12   | ENST00000286190 | p.Q133H  | c.399A>C  | Verified   | GAG | CAA | ATC | 3 | A | C |
| TCGA-61-1904 | ANGEL1     | ENST00000251089 | p.L358L  | c.1074A>C | Unverified | GAG | CTA | CTT | 3 | A | C |
| TCGA-24-1845 | ANKRD30A   | ENST00000361713 | p.Q845H  | c.2535A>C | Unverified | GAA | CAA | ACA | 3 | A | C |
| TCGA-25-2401 | ANKS1A     | ENST00000360359 | p.Q264H  | c.792A>C  | Verified   | GTG | CAA | ATC | 3 | A | C |
| TCGA-09-0369 | ANO2       | ENST00000327087 | p.K202N  | c.606A>C  | Verified   | ATC | AAA | GTT | 3 | A | C |
| TCGA-09-0369 | ANO2       | ENST00000327087 | p.K202N  | c.606A>C  | Verified   | ATC | AAA | GTT | 3 | A | C |
| TCGA-61-1740 | ANUBL1     | ENST00000344646 | p.S678R  | c.2032A>C | Unverified | GCT | AGT | AGC | 1 | A | C |
| TCGA-13-0755 | ANXA2      | ENST00000332680 | p.T141P  | c.421A>C  | Verified   | GGA | ACC | GAC | 1 | A | C |

|              |             |                 |          |           |            |     |     |     |   |   |   |
|--------------|-------------|-----------------|----------|-----------|------------|-----|-----|-----|---|---|---|
| TCGA-13-0923 | API5        | ENST00000378852 | p.Q81H   | c.243A>C  | Verified   | CGT | CAA | GCA | 3 | A | C |
| TCGA-13-1509 | ARHGAP31    | ENST00000264245 | p.N776T  | c.2327A>C | Verified   | GGC | AAT | CTG | 2 | A | C |
| TCGA-13-0890 | ARHGEF10_1  | ENST00000349830 | p.E164D  | c.492A>C  | Verified   | CCA | GAA | GTC | 3 | A | C |
| TCGA-13-0920 | ARHGEF19    | ENST00000270747 | p.K788T  | c.2363A>C | Verified   | aat | aag | cga | 2 | A | C |
| TCGA-24-1604 | ARHGEF38    | ENST00000265154 | p.K4N    | c.12A>C   | Verified   | CCC | AAA | GAA | 3 | A | C |
| TCGA-24-1470 | ARID2       | ENST00000334344 | p.K466T  | c.1397A>C | Verified   | GTA | AAA | CTC | 2 | A | C |
| TCGA-61-1915 | ARL3_ENST0  | ENST00000260746 | p.I20I   | c.60A>C   | Unverified | AGA | ATA | CTT | 3 | A | C |
| TCGA-25-2393 | ARL6IP5     | ENST00000273258 | p.K151N  | c.453A>C  | Verified   | AAT | AAA | ATG | 3 | A | C |
| TCGA-61-1904 | ARSF        | ENST00000381127 | p.N314H  | c.940A>C  | Unverified | gat | aat | gtg | 1 | A | C |
| TCGA-09-2050 | ASB18       | NM_212556.1     | p.N57T   | c.170A>C  | Verified   | gcc | aac | gtg | 2 | A | C |
| TCGA-24-1469 | ASPH        | ENST00000379454 | p.T252P  | c.754A>C  | Verified   | GAT | ACA | GAT | 1 | A | C |
| TCGA-13-1497 | ASS1        | ENST00000372393 | p.K412T  | c.1235A>C | Verified   | GCC | AAA | TAG | 2 | A | C |
| TCGA-61-2102 | ATP10D      | ENST00000273859 | p.N304T  | c.911A>C  | Verified   | AAC | AAC | AGT | 2 | A | C |
| TCGA-23-1120 | AXIN2       | ENST00000307078 | p.K123T  | c.368A>C  | Unverified | CTG | AAG | GAT | 2 | A | C |
| TCGA-61-2109 | BACH2       | ENST00000257749 | p.Y528S  | c.1583A>C | Unverified | TCC | TAC | GCG | 2 | A | C |
| TCGA-29-1784 | BFSP1       | ENST00000377873 | p.E182D  | c.546A>C  | Unverified | CTG | GAA | GTT | 3 | A | C |
| TCGA-13-0900 | BICC1       | ENST00000373886 | p.K242T  | c.725A>C  | Verified   | TTT | AAA | CAG | 2 | A | C |
| TCGA-61-2109 | BIRC6       | ENST00000421745 | p.L1631L | c.4893A>C | Unverified | CAG | CTA | CAG | 3 | A | C |
| TCGA-24-1604 | BMP2        | ENST00000378827 | p.I145L  | c.433A>C  | Verified   | ttt | atc | acc | 1 | A | C |
| TCGA-25-2042 | BMX         | ENST00000357607 | p.K313Q  | c.937A>C  | Verified   | caa | aag | gga | 1 | A | C |
| TCGA-09-2050 | BST2        | ENST00000252593 | p.Q110H  | c.330A>C  | Verified   | GGA | CAA | AAG | 3 | A | C |
| TCGA-24-2289 | C10orf71_E1 | ENST00000374144 | p.S275R  | c.823A>C  | Unverified | AAT | AGT | GCT | 1 | A | C |
| TCGA-24-0975 | C10orf96    | ENST00000333254 | p.K110Q  | c.328A>C  | Verified   | ATT | AAG | GAA | 1 | A | C |
| TCGA-61-1913 | C11orf74    | ENST00000334307 | p.L16F   | c.48A>C   | Unverified | CAA | TTA | ATC | 3 | A | C |
| TCGA-04-1542 | C17orf42    | ENST00000581216 | p.I171I  | c.513A>C  | Verified   | ATC | ATA | TCT | 3 | A | C |
| TCGA-25-2042 | C1orf88     | ENST00000369738 | p.K124T  | c.371A>C  | Verified   | CCA | AAG | GAC | 2 | A | C |
| TCGA-23-1021 | C20orf133   | ENST00000217246 | p.Y232S  | c.695A>C  | Verified   | ATC | TAC | AAA | 2 | A | C |
| TCGA-13-1488 | C6          | ENST00000263413 | p.T576P  | c.1726A>C | Verified   | AGT | ACC | TGT | 1 | A | C |
| TCGA-04-1342 | C9orf129    | ENST00000375419 | p.T124P  | c.370A>C  | Unverified | TAT | ACA | ATC | 1 | A | C |
| TCGA-61-2113 | C9orf78     | ENST00000372447 | p.K6T    | c.17A>C   | Unverified | CGG | AAG | ATT | 2 | A | C |
| TCGA-04-1331 | CA12        | ENST00000178638 | p.N150T  | c.449A>C  | Verified   | TAT | AAC | TCA | 2 | A | C |
| TCGA-23-1110 | CACNA1S     | ENST00000362061 | p.K162T  | c.485A>C  | Verified   | GTC | AAG | GCC | 2 | A | C |
| TCGA-24-2280 | CADPS       | ENST00000283269 | p.Q877H  | c.2631A>C | Unverified | TCC | CAA | GTG | 3 | A | C |
| TCGA-25-1326 | CAPN10      | ENST00000354082 | p.K66T   | c.197A>C  | Verified   | GTG | AAG | CAG | 2 | A | C |

|              |                     |                 |          |           |            |     |     |     |   |   |   |
|--------------|---------------------|-----------------|----------|-----------|------------|-----|-----|-----|---|---|---|
| TCGA-23-1022 | CAPS2               | ENST00000328705 | p.K296N  | c.888A>C  | Verified   | ATG | AAA | CTG | 3 | A | C |
| TCGA-24-2267 | CC2D2B              | ENST00000344386 | p.E294D  | c.882A>C  | Verified   | ACA | GAA | TTT | 3 | A | C |
| TCGA-24-1435 | CCDC146             | ENST00000285871 | p.Q471H  | c.1413A>C | Verified   | GAA | CAA | AAG | 3 | A | C |
| TCGA-13-0906 | CCDC57              | ENST00000445854 | p.K212N  | c.636A>C  | Verified   | CAC | AAA | GAG | 3 | A | C |
| TCGA-23-1117 | CDC6                | ENST00000209728 | p.L112L  | c.336A>C  | Verified   | gaa | cta | gcc | 3 | A | C |
| TCGA-23-1117 | CDC6                | ENST00000209728 | p.L112L  | c.336A>C  | Verified   | gaa | cta | gcc | 3 | A | C |
| TCGA-13-0900 | CDH5                | ENST00000341529 | p.N79T   | c.236A>C  | Verified   | AAG | AAT | GCC | 2 | A | C |
| TCGA-09-2049 | CES4A               | ENST00000398354 | p.Y84S   | c.251A>C  | Verified   | ACC | TAC | CCG | 2 | A | C |
| TCGA-09-0369 | CHEK1               | ENST00000438015 | p.N63H   | c.187A>C  | Unverified | CTA | AAT | CAT | 1 | A | C |
| TCGA-09-0369 | CHEK1               | ENST00000438015 | p.N63H   | c.187A>C  | Unverified | CTA | AAT | CAT | 1 | A | C |
| TCGA-23-1120 | CHMP4A              | ENST00000347519 | p.Y160S  | c.479A>C  | Verified   | GCC | TAC | CAG | 2 | A | C |
| TCGA-13-1509 | CNTNAP2             | ENST00000361727 | p.N391H  | c.1171A>C | Verified   | CTT | AAC | CAG | 1 | A | C |
| TCGA-23-1124 | CPB2                | ENST00000181383 | p.K414Q  | c.1240A>C | Verified   | TCT | AAA | ATA | 1 | A | C |
| TCGA-04-1638 | CRISP2              | ENST00000339139 | p.S113R  | c.337A>C  | Unverified | CAA | AGC | TGG | 1 | A | C |
| TCGA-23-1110 | CUBN                | ENST00000377833 | p.K510T  | c.1529A>C | Verified   | GGA | AAG | GTC | 2 | A | C |
| TCGA-61-2009 | DCT                 | ENST00000377028 | p.L145F  | c.435A>C  | Verified   | GCC | TTA | GAT | 3 | A | C |
| TCGA-13-0760 | DDX3X               | ENST00000399959 | p.N551H  | c.1651A>C | Verified   | ATA | AAT | ATT | 1 | A | C |
| TCGA-25-1326 | DDX4                | ENST00000505374 | p.N11T   | c.32A>C   | Verified   | ATC | AAC | CCT | 2 | A | C |
| TCGA-24-2280 | DGKA                | ENST00000331886 | p.N601T  | c.1802A>C | Unverified | cta | aac | atc | 2 | A | C |
| TCGA-13-0885 | DHX34               | ENST00000328771 | p.K176T  | c.527A>C  | Verified   | ctg | aag | gag | 2 | A | C |
| TCGA-24-2289 | DIP2A               | ENST00000417564 | p.K1134N | c.3402A>C | Unverified | CCA | AAA | AAG | 3 | A | C |
| TCGA-04-1356 | DNAH17              | ENST00000300671 | p.N1174H | c.3520A>C | Verified   | GCA | AAT | ACC | 1 | A | C |
| TCGA-10-0930 | DNAH3               | ENST00000261383 | p.E972D  | c.2916A>C | Verified   | ACC | GAA | ACG | 3 | A | C |
| TCGA-10-0930 | DNAH3               | ENST00000261383 | p.E972D  | c.2916A>C | Verified   | ACC | GAA | ACG | 3 | A | C |
| TCGA-20-1687 | DST                 | ENST00000370765 | p.Y2366S | c.7097A>C | Unverified | ATA | TAT | CTT | 2 | A | C |
| TCGA-20-1687 | DST_ENST00000370765 | ENST00000370765 | p.Y2366S | c.7097A>C | Unverified | ATA | TAT | CTT | 2 | A | C |
| TCGA-13-1510 | EDARADD             | ENST00000334232 | p.K128Q  | c.382A>C  | Unverified | ATA | AAG | CTG | 1 | A | C |
| TCGA-13-1488 | EMR3                | ENST00000253673 | p.N111T  | c.332A>C  | Verified   | AGT | AAT | TCC | 2 | A | C |
| TCGA-13-1489 | ENAH                | ENST00000366844 | p.R402R  | c.1204A>C | Verified   | CTT | AGG | AAA | 1 | A | C |
| TCGA-61-1738 | ENSG000003          | ENST00000400226 | p.K530N  | c.1590A>C | Unverified | CAG | AAA | ATC | 3 | A | C |
| TCGA-61-1738 | ENSG000003          | ENST00000400226 | p.K530N  | c.1590A>C | Unverified | CAG | AAA | ATC | 3 | A | C |
| TCGA-29-2427 | ENSG000003          | ENST00000528157 | p.K170Q  | c.508A>C  | Unverified | CCT | AAA | TAT | 1 | A | C |
| TCGA-61-1910 | EPC1                | ENST00000263062 | p.N205H  | c.613A>C  | Unverified | ACA | AAT | GAT | 1 | A | C |
| TCGA-61-1904 | EPHA4               | ENST00000281821 | p.Y246S  | c.737A>C  | Unverified | ATG | TAC | TGT | 2 | A | C |

|              |            |                 |          |           |            |     |     |     |   |   |   |
|--------------|------------|-----------------|----------|-----------|------------|-----|-----|-----|---|---|---|
| TCGA-61-1904 | EPHA4_ENS  | ENST00000281821 | p.Y246S  | c.737A>C  | Unverified | ATG | TAC | TGT | 2 | A | C |
| TCGA-61-1725 | EPS8       | ENST00000281172 | p.N395H  | c.1183A>C | Unverified | TTA | AAT | TAT | 1 | A | C |
| TCGA-24-1844 | ERC2       | ENST00000288221 | p.R660R  | c.1978A>C | Unverified | AAA | AGG | GAT | 1 | A | C |
| TCGA-24-1844 | ERC2_ENSTC | ENST00000288221 | p.R660R  | c.1978A>C | Unverified | AAA | AGG | GAT | 1 | A | C |
| TCGA-61-2102 | ERGIC2     | ENST00000360150 | p.R133R  | c.397A>C  | Verified   | AGT | AGG | CTA | 1 | A | C |
| TCGA-24-1850 | ETFDH      | ENST00000511912 | p.Y310S  | c.929A>C  | Unverified | CTC | TAT | CAT | 2 | A | C |
| TCGA-24-1563 | ETV5       | ENST00000306376 | p.N77H   | c.229A>C  | Verified   | GAT | AAC | CTG | 1 | A | C |
| TCGA-23-1029 | FANCM      | ENST00000267430 | p.N1186T | c.3557A>C | Unverified | GAC | AAT | AAT | 2 | A | C |
| TCGA-61-1998 | FAT1       | ENST00000441802 | p.L1625F | c.4875A>C | Unverified | GAA | TTA | GAT | 3 | A | C |
| TCGA-25-1313 | FLAD1      | ENST00000292180 | p.I436L  | c.1306A>C | Unverified | TAT | ATC | CGC | 1 | A | C |
| TCGA-13-0906 | FLNB       | ENST00000295956 | p.T1065P | c.3193A>C | Unverified | GAT | ACC | AAA | 1 | A | C |
| TCGA-24-1417 | FNIP1      | ENST00000510461 | p.E415D  | c.1245A>C | Unverified | GGA | GAA | CCT | 3 | A | C |
| TCGA-29-1695 | FTSJD1     | ENST00000338099 | p.K3T    | c.8A>C    | Unverified | AGT | AAG | TGC | 2 | A | C |
| TCGA-23-1122 | GHRHR      | ENST00000326139 | p.N216T  | c.647A>C  | Verified   | ACC | AAC | TTC | 2 | A | C |
| TCGA-61-1725 | GLCE       | ENST00000261858 | p.K546Q  | c.1636A>C | Unverified | CTT | AAA | GCC | 1 | A | C |
| TCGA-24-1423 | GOLGA3     | ENST00000204726 | p.N258T  | c.773A>C  | Verified   | GGG | AAT | TCT | 2 | A | C |
| TCGA-09-2051 | GOLGA4     | ENST00000361924 | p.K648T  | c.1943A>C | Unverified | GAA | AAG | TGT | 2 | A | C |
| TCGA-24-2024 | GPR82      | ENST00000302548 | p.L110F  | c.330A>C  | Verified   | ATT | TTA | AGT | 3 | A | C |
| TCGA-24-2024 | GPR82_ENS  | ENST00000302548 | p.L110F  | c.330A>C  | Verified   | ATT | TTA | AGT | 3 | A | C |
| TCGA-13-0916 | GRIK2_ENST | ENST00000421544 | p.K876T  | c.2627A>C | Verified   | TTA | AAA | CAT | 2 | A | C |
| TCGA-24-1846 | GRIN2A     | ENST00000396573 | p.N992T  | c.2975A>C | Unverified | tcc | aac | cct | 2 | A | C |
| TCGA-29-1695 | GRM8       | ENST00000339582 | p.T786P  | c.2356A>C | Unverified | TTT | ACC | ATG | 1 | A | C |
| TCGA-29-1691 | HAPLN4     | ENST00000291481 | p.Y112S  | c.335A>C  | Unverified | AGC | TAC | CGT | 2 | A | C |
| TCGA-23-1111 | HMOX2      | ENST00000219700 | p.Y115S  | c.344A>C  | Unverified | GAG | TAT | TTC | 2 | A | C |
| TCGA-13-1509 | HPS3       | ENST00000296051 | p.K937N  | c.2811A>C | Verified   | TGG | AAA | AAA | 3 | A | C |
| TCGA-13-0760 | HSP90AA1   | ENST00000334701 | p.K180T  | c.539A>C  | Unverified | GAC | AAA | ATC | 2 | A | C |
| TCGA-61-1915 | IGSF22     | ENST00000319338 | p.K353T  | c.1058A>C | Unverified | TCC | AAG | AAA | 2 | A | C |
| TCGA-61-1915 | IGSF22_ENS | ENST00000513874 | p.K353T  | c.1058A>C | Unverified | TCC | AAG | AAA | 2 | A | C |
| TCGA-29-1698 | ISCU       | ENST00000392807 | p.K85T   | c.254A>C  | Unverified | GTG | AAA | GGA | 2 | A | C |
| TCGA-23-1122 | IVD        | ENST00000487418 | p.N43T   | c.128A>C  | Unverified | ATC | AAT | GGG | 2 | A | C |
| TCGA-30-1891 | KCTD19     | ENST00000304372 | p.E240D  | c.720A>C  | Unverified | GTG | GAA | ATT | 3 | A | C |
| TCGA-24-1845 | KIAA0467_E | ENST00000372442 | p.K1818T | c.5453A>C | Unverified | GAA | AAG | GAG | 2 | A | C |
| TCGA-04-1649 | KIAA0528   | ENST00000333957 | p.I618I  | c.1854A>C | Unverified | AAG | ATA | AAT | 3 | A | C |
| TCGA-04-1649 | KIAA0528_E | ENST00000544930 | p.I433I  | c.1299A>C | Unverified | AAG | ATA | AAT | 3 | A | C |

|              |           |                 |          |            |            |     |     |     |   |   |   |
|--------------|-----------|-----------------|----------|------------|------------|-----|-----|-----|---|---|---|
| TCGA-23-1122 | KIF4A     | ENST00000374403 | p.K444T  | c.1331A>C  | Verified   | tgc | aaa | ctg | 2 | A | C |
| TCGA-23-1110 | KRT35     | ENST00000393989 | p.N440T  | c.1319A>C  | Verified   | ACA | AAC | TGC | 2 | A | C |
| TCGA-04-1337 | L1CAM     | ENST00000370060 | p.M1012L | c.3034A>C  | Unverified | ACT | ATG | GCC | 1 | A | C |
| TCGA-25-2401 | LAMA1     | ENST00000389658 | p.K1723T | c.5168A>C  | Verified   | CTC | AAG | GCT | 2 | A | C |
| TCGA-25-2400 | LAMA3     | ENST00000313654 | p.I788L  | c.2362A>C  | Verified   | gtt | att | ctg | 1 | A | C |
| TCGA-23-1116 | LAMC1     | ENST00000258341 | p.K1594T | c.4781A>C  | Verified   | AGG | AAG | ACC | 2 | A | C |
| TCGA-25-1313 | LAPTM4A   | ENST00000175091 | p.I45L   | c.133A>C   | Verified   | GCA | ATT | TTG | 1 | A | C |
| TCGA-29-1695 | LRBA      | ENST00000357115 | p.K2117N | c.6351A>C  | Unverified | AAA | AAA | ATC | 3 | A | C |
| TCGA-30-1855 | LRRC8A    | ENST00000372599 | p.K246T  | c.737A>C   | Unverified | GAG | AAG | GTG | 2 | A | C |
| TCGA-13-1501 | MAB21L1   | ENST00000379919 | p.K175N  | c.525A>C   | Verified   | TTT | AAA | TGC | 3 | A | C |
| TCGA-13-1501 | MAB21L1   | ENST00000379919 | p.K175N  | c.525A>C   | Verified   | TTT | AAA | TGC | 3 | A | C |
| TCGA-24-1431 | MAN2A2    | ENST00000360468 | p.Q624H  | c.1872A>C  | Unverified | CTC | CAA | GTG | 3 | A | C |
| TCGA-29-2427 | MANF      | ENST00000528157 | p.K170Q  | c.508A>C   | Unverified | CCT | AAA | TAT | 1 | A | C |
| TCGA-13-1499 | MAP4K3    | ENST00000263881 | p.Q473H  | c.1419A>C  | Verified   | tcc | caa | gtt | 3 | A | C |
| TCGA-20-0991 | MC5R      | ENST00000324750 | p.K27N   | c.81A>C    | Unverified | GTC | AAA | AAC | 3 | A | C |
| TCGA-30-1718 | MFAP3     | ENST00000322602 | p.N351T  | c.1052A>C  | Unverified | TGT | AAC | TAC | 2 | A | C |
| TCGA-24-2267 | MITF      | ENST00000394351 | p.N323T  | c.968A>C   | Verified   | GAG | AAC | TGC | 2 | A | C |
| TCGA-13-0755 | MLL3      | ENST00000262189 | p.Y366S  | c.1097A>C  | Verified   | CAC | TAT | CAT | 2 | A | C |
| TCGA-29-1711 | MLL5      | ENST00000257745 | p.M906L  | c.2716A>C  | Unverified | CCT | ATG | GAC | 1 | A | C |
| TCGA-29-1711 | MLL5      | ENST00000257745 | p.M906L  | c.2716A>C  | Unverified | CCT | ATG | GAC | 1 | A | C |
| TCGA-13-0923 | MOGAT3    | ENST00000223114 | p.K14N   | c.42A>C    | Unverified | TCC | AAA | ACC | 3 | A | C |
| TCGA-61-1904 | MORC1     | ENST00000232603 | p.K860T  | c.2579A>C  | Unverified | AAC | AAA | AAG | 2 | A | C |
| TCGA-61-2095 | MUC4      | ENST00000346145 | p.Y1092S | c.3275A>C  | Unverified | GGC | TAC | TGT | 2 | A | C |
| TCGA-61-2095 | MUC4_ENST | ENST00000405167 | p.Y5200S | c.15599A>C | Unverified | GGC | TAC | TGT | 2 | A | C |
| TCGA-61-1910 | MYH13     | ENST00000252172 | p.M214L  | c.640A>C   | Unverified | AAA | ATG | CAG | 1 | A | C |
| TCGA-61-1910 | MYH13_ENS | ENST00000570743 | p.M214L  | c.640A>C   | Unverified | AAA | ATG | CAG | 1 | A | C |
| TCGA-13-1497 | MYH4      | ENST00000255381 | p.T927P  | c.2779A>C  | Verified   | GTA | ACT | GAA | 1 | A | C |
| TCGA-23-1118 | MYO18B    | ENST00000335473 | p.E2086D | c.6258A>C  | Verified   | GAA | GAA | GTG | 3 | A | C |
| TCGA-25-1326 | MYO5C     | ENST00000261839 | p.E1117D | c.3351A>C  | Verified   | ATT | GAA | GAT | 3 | A | C |
| TCGA-13-1497 | MYOM1     | ENST00000356443 | p.N1147H | c.3439A>C  | Verified   | GTA | AAT | GTG | 1 | A | C |
| TCGA-13-0714 | MYST3     | ENST00000265713 | p.E673D  | c.2019A>C  | Verified   | CGT | GAA | GGC | 3 | A | C |
| TCGA-13-1498 | NOL4      | ENST00000261592 | p.T172P  | c.514A>C   | Verified   | GGA | ACA | GAT | 1 | A | C |
| TCGA-04-1530 | NOL8      | ENST00000442668 | p.N414T  | c.1241A>C  | Verified   | AAA | AAT | AGA | 2 | A | C |
| TCGA-09-2050 | NONO      | ENST00000276079 | p.L93L   | c.279A>C   | Verified   | aaa | cta | ttt | 3 | A | C |



|              |            |                     |          |           |            |     |     |     |   |   |   |
|--------------|------------|---------------------|----------|-----------|------------|-----|-----|-----|---|---|---|
| TCGA-61-1913 | NUP210     | ENST00000254508     | p.V610V  | c.1830A>C | Unverified | CGG | GTA | AAG | 3 | A | C |
| TCGA-04-1342 | OR2AG2     | ENST00000338569     | p.Q270H  | c.810A>C  | Verified   | AAA | CAA | GAC | 3 | A | C |
| TCGA-09-2051 | OR2T2      | ENST00000342927     | p.V305V  | c.915A>C  | Unverified | AAA | GTA | CTA | 3 | A | C |
| TCGA-23-1022 | OR4D6      | ENST00000300127     | p.Y287S  | c.860A>C  | Verified   | ATC | TAT | TCC | 2 | A | C |
| TCGA-13-0900 | OR4E2      | ENST00000408935     | p.L4L    | c.12A>C   | Verified   | AGT | CTA | AAC | 3 | A | C |
| TCGA-13-0905 | OR6Y1      | ENST00000302617     | p.I214L  | c.640A>C  | Verified   | GCT | ATT | CCT | 1 | A | C |
| TCGA-13-0795 | OSTalpha   | ENST00000296327     | p.L268L  | c.804A>C  | Verified   | GCC | CTA | CAG | 3 | A | C |
| TCGA-13-0885 | PABPCP2    | ENST00000359464     | p.L187F  | c.561A>C  | Verified   | GCT | TTA | GCT | 3 | A | C |
| TCGA-13-0793 | PBRM1_ENS  | ENST00000296302     | p.I193I  | c.579A>C  | Unverified | GCC | ATA | GTT | 3 | A | C |
| TCGA-23-1116 | PCDHA8     | ENST00000378123     | p.K343N  | c.1029A>C | Unverified | GAT | AAA | AAT | 3 | A | C |
| TCGA-23-1120 | PDE12      | ENST00000311180     | p.V270V  | c.810A>C  | Unverified | GTG | GTA | GAG | 3 | A | C |
| TCGA-24-1844 | PIKFYVE    | ENST00000264380     | p.N310T  | c.929A>C  | Unverified | ACT | AAC | CTG | 2 | A | C |
| TCGA-13-0913 | PJA2       | ENST00000361189     | p.K46N   | c.138A>C  | Verified   | TTT | AAA | CCA | 3 | A | C |
| TCGA-13-0760 | PLCB2      | ENST00000260402     | p.K71T   | c.212A>C  | Verified   | GGG | AAG | TTT | 2 | A | C |
| TCGA-20-0991 | PLCB4      | NM_000933.2         | p.R167R  | c.499A>C  | Verified   | gtt | agg | agt | 1 | A | C |
| TCGA-24-1563 | POTEJ      | ENST00000409602     | p.Q559H  | c.1677A>C | Unverified | GAA | CAA | AAT | 3 | A | C |
| TCGA-24-1563 | POTEJ_ENST | ENST00000409602_v68 | p.Q559H  | c.1677A>C | Unverified | GAA | CAA | AAT | 3 | A | C |
| TCGA-13-0762 | PRKDC      | NM_006904           | p.N1662H | c.4984A>C | Verified   | ttt | aat | aca | 1 | A | C |
| TCGA-13-0762 | PRKDC      | NM_006904           | p.N1662H | c.4984A>C | Verified   | ttt | aat | aca | 1 | A | C |
| TCGA-13-0900 | PTCHD3     | ENST00000438700     | p.K685T  | c.2054A>C | Verified   | GAA | AAA | AAT | 2 | A | C |
| TCGA-24-2267 | PUS10      | ENST00000316752     | p.K70N   | c.210A>C  | Verified   | AAG | AAA | ATT | 3 | A | C |
| TCGA-23-2077 | PXDN       | ENST00000252804     | p.Y1176S | c.3527A>C | Verified   | GTC | TAC | TGC | 2 | A | C |
| TCGA-13-0760 | RAB3IP     | ENST00000550536     | p.K5T    | c.14A>C   | Verified   | aaa | aag | atg | 2 | A | C |
| TCGA-24-1104 | RABGAP1    | NM_012197.2         | p.V40V   | c.120A>C  | Verified   | tta | gta | ggg | 3 | A | C |
| TCGA-13-0755 | RAD54L2    | ENST00000409535     | p.S681R  | c.2041A>C | Verified   | AAT | AGC | AAG | 1 | A | C |
| TCGA-09-2050 | RAG1       | ENST00000299440     | p.K969T  | c.2906A>C | Verified   | AAC | AAA | CTG | 2 | A | C |
| TCGA-13-0924 | RBM14      | ENST00000310137     | p.L608F  | c.1824A>C | Verified   | CGT | TTA | GCC | 3 | A | C |
| TCGA-61-1900 | RFPL3      | ENST00000397468     | p.T147P  | c.439A>C  | Unverified | TTT | ACC | TGT | 1 | A | C |
| TCGA-61-1900 | RFPL3_ENST | ENST00000249007     | p.T176P  | c.526A>C  | Unverified | TTT | ACC | TGT | 1 | A | C |
| TCGA-24-0975 | RFX1       | ENST00000254325     | p.N551T  | c.1652A>C | Unverified | ACC | AAC | GGC | 2 | A | C |
| TCGA-29-1698 | RGS7       | ENST00000366565     | p.Y290S  | c.869A>C  | Unverified | CAG | TAT | TTA | 2 | A | C |
| TCGA-29-1698 | RGS7_ENST  | ENST00000366565     | p.Y290S  | c.869A>C  | Unverified | CAG | TAT | TTA | 2 | A | C |
| TCGA-13-1498 | RIF1       | ENST00000444746     | p.E1319D | c.3957A>C | Verified   | gtt | gaa | ggc | 3 | A | C |
| TCGA-13-0807 | RIMS2      | ENST00000507740     | p.Y658S  | c.1973A>C | Verified   | TGG | TAC | AAA | 2 | A | C |

|              |           |                 |          |           |            |     |     |     |   |   |   |
|--------------|-----------|-----------------|----------|-----------|------------|-----|-----|-----|---|---|---|
| TCGA-13-0807 | RIMS2_ENS | ENST00000436393 | p.Y644S  | c.1931A>C | Verified   | TGG | TAC | AAA | 2 | A | C |
| TCGA-20-0990 | RNASE9    | ENST00000338904 | p.K154Q  | c.460A>C  | Verified   | TGT | AAA | TAC | 1 | A | C |
| TCGA-61-2102 | RNASE9    | ENST00000338904 | p.I127L  | c.379A>C  | Verified   | GGA | ATT | AGG | 1 | A | C |
| TCGA-20-1683 | RNF20     | ENST00000389120 | p.T358P  | c.1072A>C | Unverified | act | aca | caa | 1 | A | C |
| TCGA-23-1031 | RNF213    | ENST00000336301 | p.I568L  | c.1702A>C | Verified   | GCT | ATA | AGC | 1 | A | C |
| TCGA-29-1783 | ROBO1     | ENST00000464233 | p.E1236D | c.3708A>C | Unverified | GAT | GAA | CGA | 3 | A | C |
| TCGA-29-1783 | ROBO1_ENS | ENST00000464233 | p.E1236D | c.3708A>C | Unverified | GAT | GAA | CGA | 3 | A | C |
| TCGA-29-1783 | ROBO1_ENS | ENST00000464233 | p.E1236D | c.3708A>C | Unverified | GAT | GAA | CGA | 3 | A | C |
| TCGA-29-1783 | ROBO1_ENS | ENST00000495273 | p.E1191D | c.3573A>C | Unverified | GAT | GAA | CGA | 3 | A | C |
| TCGA-61-1725 | RPGRIP1L  | ENST00000379925 | p.L735F  | c.2205A>C | Unverified | CGA | TTA | AGA | 3 | A | C |
| TCGA-24-1846 | RXFP3     | ENST00000330120 | p.K398T  | c.1193A>C | Unverified | CGC | AAG | GCG | 2 | A | C |
| TCGA-13-1507 | RYR2      | ENST00000366574 | p.K1745T | c.5234A>C | Verified   | AAA | AAA | CAC | 2 | A | C |
| TCGA-24-2289 | SBF2      | ENST00000256190 | p.N766T  | c.2297A>C | Unverified | AAA | AAC | AAG | 2 | A | C |
| TCGA-13-0761 | SCIN      | ENST00000297029 | p.K672T  | c.2015A>C | Verified   | CTG | AAG | TCT | 2 | A | C |
| TCGA-13-0761 | SCIN      | ENST00000297029 | p.K672T  | c.2015A>C | Verified   | CTG | AAG | TCT | 2 | A | C |
| TCGA-29-1775 | SCN11A    | ENST00000302328 | p.T372P  | c.1114A>C | Unverified | ACT | ACT | GGG | 1 | A | C |
| TCGA-13-0885 | SDR16C5   | ENST00000303749 | p.I42L   | c.124A>C  | Verified   | GAA | ATA | GTC | 1 | A | C |
| TCGA-13-0903 | SEC23B    | ENST00000377465 | p.T116P  | c.346A>C  | Verified   | TCT | ACA | ATT | 1 | A | C |
| TCGA-24-1849 | SEMA4B    | ENST00000332496 | p.Y160S  | c.479A>C  | Unverified | acc | tac | atc | 2 | A | C |
| TCGA-13-0890 | SIK3      | SU_QSK          | p.L773F  | c.2319A>C | Verified   | agg | tta | agg | 3 | A | C |
| TCGA-04-1343 | SLC24A2   | ENST00000341998 | p.Y515S  | c.1544A>C | Verified   | TCT | TAC | TTG | 2 | A | C |
| TCGA-29-1711 | SLC5A7    | ENST00000264047 | p.S356R  | c.1066A>C | Unverified | GCA | AGT | TCC | 1 | A | C |
| TCGA-29-1711 | SLC5A7    | ENST00000264047 | p.S356R  | c.1066A>C | Unverified | GCA | AGT | TCC | 1 | A | C |
| TCGA-61-1740 | SLC9A10   | ENST00000305815 | p.L277F  | c.831A>C  | Unverified | CTT | TTA | AAT | 3 | A | C |
| TCGA-25-1326 | SLITRK2   | ENST00000447897 | p.K512N  | c.1536A>C | Verified   | gtg | aaa | ggg | 3 | A | C |
| TCGA-25-2042 | SNX6      | NM_152233.1     | p.R278R  | c.832A>C  | Unverified | aca | aga | aaa | 1 | A | C |
| TCGA-13-0795 | SPIN3     | NM_001010862.1  | p.N48T   | c.143A>C  | Verified   | ggg | aac | atc | 2 | A | C |
| TCGA-24-1469 | SPTA1     | ENST00000368148 | p.K679N  | c.2037A>C | Verified   | CAG | AAA | GGG | 3 | A | C |
| TCGA-24-2288 | SRCAP     | ENST00000262518 | p.L1507L | c.4521A>C | Unverified | ACT | CTA | GGT | 3 | A | C |
| TCGA-61-1907 | SRPK2     | ENST00000357311 | p.N267T  | c.800A>C  | Unverified | aaa | aac | aaa | 2 | A | C |
| TCGA-29-1702 | SRSF7     | ENST00000313117 | p.L37F   | c.111A>C  | Unverified | CCT | TTA | AGA | 3 | A | C |
| TCGA-23-1021 | STK38     | ENST00000229812 | p.K332T  | c.995A>C  | Verified   | tat | aag | aag | 2 | A | C |
| TCGA-24-2289 | SVIL      | ENST00000355867 | p.V327V  | c.981A>C  | Unverified | TCC | GTA | ACT | 3 | A | C |
| TCGA-24-1845 | SZT2      | ENST00000372442 | p.K1818T | c.5453A>C | Unverified | GAA | AAG | GAG | 2 | A | C |

|              |            |                 |           |            |            |     |     |     |   |   |   |
|--------------|------------|-----------------|-----------|------------|------------|-----|-----|-----|---|---|---|
| TCGA-24-1845 | SZT2_ENST0 | ENST00000562955 | p.K2660T  | c.7979A>C  | Unverified | GAA | AAG | GAG | 2 | A | C |
| TCGA-30-1714 | TCEAL4     | NM_024863.3     | p.K189T   | c.566A>C   | Unverified | gga | aag | aca | 2 | A | C |
| TCGA-24-1435 | TCP11      | ENST00000373979 | p.T426P   | c.1276A>C  | Verified   | AAA | ACC | CTC | 1 | A | C |
| TCGA-13-0791 | TGFBR2     | NM_003242       | p.K468Q   | c.1402A>C  | Verified   | gta | aaa | gat | 1 | A | C |
| TCGA-13-0900 | TMEM177    | ENST00000272521 | p.N277T   | c.830A>C   | Verified   | GGG | AAC | ATC | 2 | A | C |
| TCGA-24-1845 | TMEM98     | ENST00000394642 | p.L62F    | c.186A>C   | Unverified | GAG | TTA | GAA | 3 | A | C |
| TCGA-09-1665 | TOMM70A    | ENST00000284320 | p.K188T   | c.563A>C   | Verified   | GTG | AAA | GCT | 2 | A | C |
| TCGA-61-2095 | TRAM1L1    | ENST00000310754 | p.N216T   | c.647A>C   | Unverified | TTG | AAT | CAT | 2 | A | C |
| TCGA-29-1783 | TRO        | ENST00000319167 | p.I523I   | c.1569A>C  | Unverified | ggc | ata | ctg | 3 | A | C |
| TCGA-29-1783 | TRO_ENST0  | ENST00000173898 | p.I523I   | c.1569A>C  | Unverified | GGC | ATA | CTG | 3 | A | C |
| TCGA-13-0885 | TSHZ2      | ENST00000371497 | p.E638D   | c.1914A>C  | Verified   | AGT | GAA | ACA | 3 | A | C |
| TCGA-29-1769 | TTC21B     | ENST00000243344 | p.K220T   | c.659A>C   | Unverified | ATG | AAA | TTA | 2 | A | C |
| TCGA-61-1915 | TTN        | NM_003319       | p.Y12727S | c.38180A>C | Unverified | ggc | tat | ttc | 2 | A | C |
| TCGA-61-1915 | TTN_ENST0  | ENST00000342175 | p.Y12919S | c.38756A>C | Unverified | GGC | TAT | TTC | 2 | A | C |
| TCGA-61-1915 | TTN_ENST0  | ENST00000342992 | p.Y19224S | c.57671A>C | Unverified | GGC | TAT | TTC | 2 | A | C |
| TCGA-61-1915 | TTN_ENST0  | ENST00000356127 | p.Y19222S | c.57665A>C | Unverified | GGC | TAT | TTC | 2 | A | C |
| TCGA-61-1915 | TTN_ENST0  | ENST00000359218 | p.Y12852S | c.38555A>C | Unverified | GGC | TAT | TTC | 2 | A | C |
| TCGA-13-1488 | USP4       | ENST00000265560 | p.K186N   | c.558A>C   | Verified   | aac | aaa | tac | 3 | A | C |
| TCGA-61-2009 | WDFY3      | ENST00000295888 | p.Y411S   | c.1232A>C  | Verified   | ATT | TAC | ATG | 2 | A | C |
| TCGA-61-1907 | WNK1       | NM_018979       | p.N2045T  | c.6134A>C  | Unverified | cag | aat | cta | 2 | A | C |
| TCGA-61-1907 | WNK1_ENST  | ENST00000537687 | p.N2305T  | c.6914A>C  | Unverified | CAG | AAT | CTA | 2 | A | C |
| TCGA-13-0761 | XPC        | ENST00000285021 | p.K387T   | c.1160A>C  | Verified   | AAC | AAG | GGA | 2 | A | C |
| TCGA-13-0761 | XPC        | ENST00000285021 | p.K387T   | c.1160A>C  | Verified   | AAC | AAG | GGA | 2 | A | C |
| TCGA-13-1499 | XRCC6      | ENST00000360079 | p.E418D   | c.1254A>C  | Verified   | GAA | GAA | GAG | 3 | A | C |
| TCGA-25-2042 | ZBTB25     | ENST00000394715 | p.Q69H    | c.207A>C   | Verified   | ATC | CAA | CCT | 3 | A | C |
| TCGA-23-1116 | ZGPAT      | ENST00000328969 | p.Y139S   | c.416A>C   | Unverified | TAC | TAC | AGC | 2 | A | C |
| TCGA-25-1313 | ZNF132     | ENST00000254166 | p.K675N   | c.2025A>C  | Unverified | CAG | AAA | GTT | 3 | A | C |
| TCGA-25-1326 | ZNF14      | ENST00000344099 | p.R64R    | c.190A>C   | Verified   | CGA | AGA | TGT | 1 | A | C |
| TCGA-23-1118 | ZNF222     | ENST00000187879 | p.Q84H    | c.252A>C   | Verified   | TCT | CAA | GAT | 3 | A | C |
| TCGA-24-2289 | ZNF227     | ENST00000313040 | p.N366T   | c.1097A>C  | Unverified | TCA | AAT | TTT | 2 | A | C |
| TCGA-24-2267 | ZNF425     | ENST00000378061 | p.K468Q   | c.1402A>C  | Unverified | CAA | AAG | CCC | 1 | A | C |
| TCGA-29-1775 | ZNF573     | ENST00000339503 | p.K214T   | c.641A>C   | Unverified | GAA | AAA | CCA | 2 | A | C |
| TCGA-13-0900 | ZNF654_EN  | ENST00000309495 | p.K567T   | c.1700A>C  | Verified   | AAG | AAA | TGT | 2 | A | C |
| TCGA-61-1998 | ZNF791     | ENST00000343325 | p.K167N   | c.501A>C   | Verified   | GGA | AAA | ACC | 3 | A | C |

|              |            |                     |          |           |            |     |     |     |   |   |   |
|--------------|------------|---------------------|----------|-----------|------------|-----|-----|-----|---|---|---|
| TCGA-13-1488 | ABCB4      | ENST00000359206     | p.D576G  | c.1727A>G | Verified   | CTG | GAT | AAG | 2 | A | G |
| TCGA-04-1331 | ABHD13     | ENST00000375898     | p.P223P  | c.669A>G  | Verified   | ATA | CCA | CAT | 3 | A | G |
| TCGA-23-1114 | AC073082.1 | ENST00000378305     | p.P36P   | c.108A>G  | Unverified | ACA | CCA | GAA | 3 | A | G |
| TCGA-23-1114 | AC073082.1 | ENST00000378305_v68 | p.P36P   | c.108A>G  | Unverified | ACA | CCA | GAA | 3 | A | G |
| TCGA-24-2035 | ACP6       | ENST00000369238     | p.K236E  | c.706A>G  | Verified   | GTG | AAG | GAC | 1 | A | G |
| TCGA-29-1777 | ACSM1      | ENST00000307493     | p.S318S  | c.954A>G  | Unverified | GTA | TCA | TCT | 3 | A | G |
| TCGA-09-1665 | ACSS3      | ENST00000548058     | p.G500G  | c.1500A>G | Verified   | TTA | GGA | AAT | 3 | A | G |
| TCGA-13-0714 | ACTC1      | ENST00000290378     | p.S241G  | c.721A>G  | Verified   | AAG | AGC | TAT | 1 | A | G |
| TCGA-13-0900 | ADAMTS16_  | ENST00000274181     | p.T1148A | c.3442A>G | Unverified | CAG | ACG | AGG | 1 | A | G |
| TCGA-23-1031 | ADCY9      | ENST00000294016     | p.M1197V | c.3589A>G | Verified   | AGG | ATG | GAC | 1 | A | G |
| TCGA-13-0887 | ADI1       | ENST00000327435     | p.K144E  | c.430A>G  | Verified   | ACG | AAG | GCC | 1 | A | G |
| TCGA-29-1781 | ADNP       | ENST00000349014     | p.H563R  | c.1688A>G | Unverified | ATC | CAT | CTC | 2 | A | G |
| TCGA-13-0883 | AHCYL2     | ENST00000325006     | p.D287G  | c.860A>G  | Verified   | GAA | GAT | GAC | 2 | A | G |
| TCGA-30-1855 | AIM2       | ENST00000368130     | p.H130R  | c.389A>G  | Unverified | CCT | CAT | GTT | 2 | A | G |
| TCGA-29-1764 | AK5        | ENST00000354567     | p.D352G  | c.1055A>G | Unverified | GAA | GAT | CAG | 2 | A | G |
| TCGA-23-1122 | ALCAM      | ENST00000306107     | p.P441P  | c.1323A>G | Verified   | TTT | CCA | AAG | 3 | A | G |
| TCGA-13-1497 | ALDH3A2    | ENST00000581518     | p.I371V  | c.1111A>G | Verified   | ctc | atc | aaa | 1 | A | G |
| TCGA-24-2262 | ALG1       | ENST00000262374     | p.Q339R  | c.1016A>G | Verified   | TTC | CAG | CAC | 2 | A | G |
| TCGA-13-0920 | ANAPC4     | ENST00000315368     | p.R632R  | c.1896A>G | Verified   | gtc | aga | aga | 3 | A | G |
| TCGA-23-1117 | ANPEP      | ENST00000300060     | p.G143G  | c.429A>G  | Verified   | GTG | GGA | GGC | 3 | A | G |
| TCGA-23-1117 | ANPEP      | ENST00000300060     | p.G143G  | c.429A>G  | Verified   | GTG | GGA | GGC | 3 | A | G |
| TCGA-04-1338 | APC        | ENST00000457016     | p.E1286G | c.3857A>G | Unverified | GAT | GAA | ATA | 2 | A | G |
| TCGA-24-2024 | APC        | ENST00000457016     | p.Q1429R | c.4286A>G | Verified   | GGA | CAA | ACC | 2 | A | G |
| TCGA-10-0930 | APCDD1L    | ENST00000371149     | p.I50V   | c.148A>G  | Verified   | gcg | atc | ctg | 1 | A | G |
| TCGA-10-0930 | APCDD1L    | ENST00000371149     | p.I50V   | c.148A>G  | Verified   | gcg | atc | ctg | 1 | A | G |
| TCGA-61-1895 | AQP11      | ENST00000313578     | p.S149G  | c.445A>G  | Unverified | GTC | AGC | GAG | 1 | A | G |
| TCGA-13-0890 | ARHGEF15   | ENST00000361926     | p.E754G  | c.2261A>G | Verified   | tat | gag | gac | 2 | A | G |
| TCGA-24-2280 | ARHGEF17   | ENST00000263674     | p.R1838R | c.5514A>G | Unverified | aac | cga | gtc | 3 | A | G |
| TCGA-29-1777 | ARL5B      | ENST00000377275     | p.N78D   | c.232A>G  | Unverified | tgg | aac | aca | 1 | A | G |
| TCGA-24-0979 | ASAP1      | ENST00000357668     | p.D720G  | c.2159A>G | Verified   | GAT | GAT | CTG | 2 | A | G |
| TCGA-23-2077 | ASAP1      | ENST00000357668     | p.G937G  | c.2811A>G | Verified   | CCT | GGA | GAC | 3 | A | G |
| TCGA-24-1844 | ATAD3C     | ENST00000378785     | p.P178P  | c.534A>G  | Unverified | GGG | CCA | CCA | 3 | A | G |
| TCGA-61-1914 | ATIC_ENST0 | ENST00000236959     | p.G345G  | c.1035A>G | Unverified | CCA | GGA | TAT | 3 | A | G |
| TCGA-04-1367 | ATP11A     | ENST00000375645     | p.E204G  | c.611A>G  | Unverified | ACA | GAG | GAG | 2 | A | G |

|              |            |                 |          |           |            |     |     |     |   |   |   |
|--------------|------------|-----------------|----------|-----------|------------|-----|-----|-----|---|---|---|
| TCGA-04-1336 | ATP5O      | ENST00000290299 | p.R64G   | c.190A>G  | Verified   | TTG | AGA | GTA | 1 | A | G |
| TCGA-20-0991 | ATRIP      | ENST00000320211 | p.H418R  | c.1253A>G | Unverified | GTG | CAT | TTC | 2 | A | G |
| TCGA-13-0890 | AURKA      | ENST00000395909 | p.G265G  | c.795A>G  | Verified   | CTT | GGA | TCA | 3 | A | G |
| TCGA-29-1785 | BAI3       | ENST00000370598 | p.T976T  | c.2928A>G | Unverified | AGG | ACA | CGG | 3 | A | G |
| TCGA-29-1785 | BAI3       | ENST00000370598 | p.T976T  | c.2928A>G | Unverified | AGG | ACA | CGG | 3 | A | G |
| TCGA-13-0893 | BAZ1B      | ENST00000339594 | p.H1033R | c.3098A>G | Verified   | ATT | CAT | CTA | 2 | A | G |
| TCGA-61-1904 | BCOR       | ENST00000397354 | p.T347A  | c.1039A>G | Unverified | CCC | ACC | CAG | 1 | A | G |
| TCGA-13-0762 | BCORL1     | ENST00000218147 | p.K913E  | c.2737A>G | Verified   | gcc | aag | cct | 1 | A | G |
| TCGA-13-0762 | BCORL1     | ENST00000218147 | p.K913E  | c.2737A>G | Verified   | gcc | aag | cct | 1 | A | G |
| TCGA-30-1857 | BDKRB1     | ENST00000216629 | p.I178V  | c.532A>G  | Unverified | TCC | ATC | CAA | 1 | A | G |
| TCGA-24-1464 | BECN1      | ENST00000361523 | p.D405G  | c.1214A>G | Verified   | gaa | gac | aca | 2 | A | G |
| TCGA-25-1313 | BIN3       | ENST00000276416 | p.E143G  | c.428A>G  | Unverified | GTG | GAG | AAG | 2 | A | G |
| TCGA-24-1469 | BIRC3      | ENST00000263464 | p.S123S  | c.369A>G  | Verified   | cac | tca | tta | 3 | A | G |
| TCGA-61-2008 | BLM        | ENST00000355112 | p.I1279V | c.3835A>G | Verified   | GTG | ATT | TCA | 1 | A | G |
| TCGA-13-0904 | BMP3       | ENST00000282701 | p.D193G  | c.578A>G  | Verified   | CGA | GAT | ATT | 2 | A | G |
| TCGA-23-1022 | BMP3       | ENST00000282701 | p.G150G  | c.450A>G  | Verified   | TCT | GGA | GGA | 3 | A | G |
| TCGA-24-1103 | BMP8B      | ENST00000372827 | p.A264A  | c.792A>G  | Unverified | CGG | GCA | GTG | 3 | A | G |
| TCGA-61-1740 | BOD1L      | ENST00000040738 | p.S124S  | c.372A>G  | Unverified | AAA | TCA | GGA | 3 | A | G |
| TCGA-61-2009 | BUB3       | ENST00000368865 | p.E232G  | c.695A>G  | Verified   | ATT | GAG | CAG | 2 | A | G |
| TCGA-23-1124 | C10orf96   | ENST00000333254 | p.E155G  | c.464A>G  | Verified   | ATG | GAA | CAT | 2 | A | G |
| TCGA-13-0884 | C12orf11   | ENST00000261191 | p.N36D   | c.106A>G  | Verified   | AAG | AAT | AGA | 1 | A | G |
| TCGA-09-2056 | C19orf46   | ENST00000324444 | p.N107D  | c.319A>G  | Verified   | CAG | AAC | AGC | 1 | A | G |
| TCGA-09-2056 | C1orf168   | ENST00000343433 | p.K637E  | c.1909A>G | Verified   | ACC | AAG | AAG | 1 | A | G |
| TCGA-24-1563 | C1orf172   | ENST00000320567 | p.S158G  | c.472A>G  | Verified   | AGC | AGC | TTC | 1 | A | G |
| TCGA-23-1022 | C21orf63   | ENST00000300255 | p.R344R  | c.1032A>G | Verified   | ATC | AGA | GAG | 3 | A | G |
| TCGA-24-1850 | C2orf78    | ENST00000342345 | p.D454G  | c.1361A>G | Unverified | CTT | GAC | CAA | 2 | A | G |
| TCGA-24-1850 | C2orf78_EN | ENST00000409561 | p.D464G  | c.1391A>G | Unverified | CTT | GAC | CAA | 2 | A | G |
| TCGA-25-1318 | C3orf23    | ENST00000342649 | p.R185R  | c.555A>G  | Verified   | TCG | AGA | GTG | 3 | A | G |
| TCGA-25-1318 | C3orf23    | ENST00000342649 | p.R185R  | c.555A>G  | Verified   | TCG | AGA | GTG | 3 | A | G |
| TCGA-24-2289 | C3orf70    | ENST00000335012 | p.K107E  | c.319A>G  | Unverified | TTG | AAA | TTT | 1 | A | G |
| TCGA-29-1691 | C5orf28    | ENST00000500337 | p.D91G   | c.272A>G  | Unverified | ATT | GAT | GTA | 2 | A | G |
| TCGA-29-1761 | C6orf170   | ENST00000398212 | p.G421G  | c.1263A>G | Unverified | TTA | GGA | CAA | 3 | A | G |
| TCGA-29-1696 | C6orf221   | ENST00000370367 | p.G60G   | c.180A>G  | Unverified | GGC | GGA | GAA | 3 | A | G |
| TCGA-29-1696 | C6orf221   | ENST00000370367 | p.G60G   | c.180A>G  | Unverified | GGC | GGA | GAA | 3 | A | G |

|              |            |                 |          |           |            |     |     |     |   |   |   |
|--------------|------------|-----------------|----------|-----------|------------|-----|-----|-----|---|---|---|
| TCGA-23-1022 | C7orf16    | ENST00000342032 | p.D136G  | c.407A>G  | Verified   | AGG | GAC | GAG | 2 | A | G |
| TCGA-13-1481 | C7orf58    | ENST00000310396 | p.D151G  | c.452A>G  | Verified   | TGG | GAT | CTG | 2 | A | G |
| TCGA-23-1120 | C7orf72    | ENST00000297001 | p.D336G  | c.1007A>G | Verified   | GAT | GAT | GTT | 2 | A | G |
| TCGA-13-0883 | CABS1      | ENST00000273936 | p.I106V  | c.316A>G  | Verified   | TCC | ATA | ACA | 1 | A | G |
| TCGA-29-1785 | CAMTA1     | ENST00000303635 | p.T563A  | c.1687A>G | Unverified | CTG | ACC | GCC | 1 | A | G |
| TCGA-29-1785 | CAMTA1     | ENST00000303635 | p.T563A  | c.1687A>G | Unverified | CTG | ACC | GCC | 1 | A | G |
| TCGA-13-1481 | CAPN10     | ENST00000354082 | p.T332T  | c.996A>G  | Verified   | TAC | ACA | GAG | 3 | A | G |
| TCGA-29-1761 | CAPS       | ENST00000222125 | p.T7A    | c.19A>G   | Unverified | GCC | ACC | ATG | 1 | A | G |
| TCGA-24-2289 | CASQ1      | ENST00000368078 | p.D178G  | c.533A>G  | Unverified | GAG | GAT | GAG | 2 | A | G |
| TCGA-30-1857 | CCDC27     | ENST00000294600 | p.K84E   | c.250A>G  | Unverified | TGG | AAA | CCG | 1 | A | G |
| TCGA-24-2288 | CCDC39     | ENST00000273654 | p.R725R  | c.2175A>G | Unverified | AAT | AGA | TAT | 3 | A | G |
| TCGA-04-1347 | CCDC88A    | ENST00000263630 | p.D1409G | c.4226A>G | Verified   | AAA | GAT | ATT | 2 | A | G |
| TCGA-30-1718 | CCNB3      | ENST00000376042 | p.K1299E | c.3895A>G | Unverified | GAG | AAG | GCT | 1 | A | G |
| TCGA-30-1718 | CCNB3_ENS  | ENST00000376042 | p.K1299E | c.3895A>G | Unverified | GAG | AAG | GCT | 1 | A | G |
| TCGA-29-1777 | CCT4       | ENST00000394440 | p.I529V  | c.1585A>G | Unverified | AGC | ATT | CTG | 1 | A | G |
| TCGA-04-1356 | CD163L1    | ENST00000313599 | p.H991R  | c.2972A>G | Verified   | ATC | CAT | GGA | 2 | A | G |
| TCGA-13-1488 | CD200R1L   | ENST00000398214 | p.H135R  | c.404A>G  | Verified   | TTC | CAT | CGT | 2 | A | G |
| TCGA-25-1326 | CD276      | ENST00000318443 | p.S233G  | c.697A>G  | Unverified | CAC | AGC | TCT | 1 | A | G |
| TCGA-29-1705 | CD46       | ENST00000358170 | p.D33G   | c.98A>G   | Unverified | TCC | GAT | GCC | 2 | A | G |
| TCGA-23-1124 | CDCA7      | ENST00000306721 | p.E330G  | c.989A>G  | Verified   | TTG | GAG | AAC | 2 | A | G |
| TCGA-23-1029 | CDH6       | ENST00000265071 | p.E662G  | c.1985A>G | Unverified | GAC | GAA | GGT | 2 | A | G |
| TCGA-61-2009 | CDK19      | ENST00000368911 | p.D90G   | c.269A>G  | Verified   | agt | gac | agg | 2 | A | G |
| TCGA-13-1408 | CEACAM6    | ENST00000199764 | p.R72R   | c.216A>G  | Unverified | GAA | AGA | GTG | 3 | A | G |
| TCGA-61-1740 | CEP128     | ENST00000281129 | p.A670A  | c.2010A>G | Unverified | ACT | GCA | CAG | 3 | A | G |
| TCGA-24-1846 | CEP192     | ENST00000325971 | p.R1932R | c.5796A>G | Unverified | ATT | CGA | CTA | 3 | A | G |
| TCGA-24-1846 | CEP192_ENS | ENST00000506447 | p.R2528R | c.7584A>G | Unverified | ATT | CGA | CTA | 3 | A | G |
| TCGA-09-2049 | CHD5       | ENST00000262450 | p.M1167V | c.3499A>G | Verified   | ATG | ATG | CTC | 1 | A | G |
| TCGA-23-1122 | CHD8       | ENST00000399982 | p.H803R  | c.2408A>G | Verified   | tca | cat | gaa | 2 | A | G |
| TCGA-24-1469 | CIT        | SU_CRIK         | p.A666A  | c.1998A>G | Verified   | cag | gca | aag | 3 | A | G |
| TCGA-30-1891 | CLDN11     | ENST00000064724 | p.I151V  | c.451A>G  | Unverified | ACC | ATC | GTG | 1 | A | G |
| TCGA-10-0930 | CLEC14A    | ENST00000342213 | p.E482G  | c.1445A>G | Verified   | GCG | GAG | TCC | 2 | A | G |
| TCGA-10-0930 | CLEC14A    | ENST00000342213 | p.E482G  | c.1445A>G | Verified   | GCG | GAG | TCC | 2 | A | G |
| TCGA-61-2012 | CLEC4F     | ENST00000272367 | p.I390V  | c.1168A>G | Verified   | GAG | ATA | CAG | 1 | A | G |
| TCGA-13-0904 | CLEC4F     | ENST00000272367 | p.E97G   | c.290A>G  | Verified   | AGG | GAG | GCA | 2 | A | G |

|              |           |                 |          |           |            |     |     |     |   |   |   |
|--------------|-----------|-----------------|----------|-----------|------------|-----|-----|-----|---|---|---|
| TCGA-29-1693 | CNN3      | ENST00000370206 | p.H309R  | c.926A>G  | Unverified | TAT | CAT | GGC | 2 | A | G |
| TCGA-29-1701 | CNTN1     | ENST00000551295 | p.K755E  | c.2263A>G | Unverified | tgg | aaa | aaa | 1 | A | G |
| TCGA-23-1120 | COASY     | ENST00000393818 | p.N299D  | c.895A>G  | Unverified | ATC | AAC | CGC | 1 | A | G |
| TCGA-29-1690 | COG2      | ENST00000366669 | p.R453R  | c.1359A>G | Unverified | GCA | CGA | TAC | 3 | A | G |
| TCGA-24-1563 | COPS7B    | ENST00000410024 | p.I162V  | c.484A>G  | Verified   | gac | atc | cga | 1 | A | G |
| TCGA-23-1117 | CPN2      | ENST00000323830 | p.S321S  | c.963A>G  | Verified   | CTC | TCA | TAC | 3 | A | G |
| TCGA-23-1117 | CPN2      | ENST00000323830 | p.S321S  | c.963A>G  | Verified   | CTC | TCA | TAC | 3 | A | G |
| TCGA-23-2078 | CRB1      | ENST00000367400 | p.E710G  | c.2129A>G | Verified   | AGA | GAG | TAT | 2 | A | G |
| TCGA-24-1435 | CREB3L3   | ENST00000078445 | p.T135T  | c.405A>G  | Verified   | ACC | ACA | ACC | 3 | A | G |
| TCGA-20-1686 | CRMP1     | ENST00000324989 | p.I139V  | c.415A>G  | Unverified | ATC | ATC | AAC | 1 | A | G |
| TCGA-13-0762 | CROT      | ENST00000331536 | p.K375E  | c.1123A>G | Verified   | GAG | AAA | GTT | 1 | A | G |
| TCGA-13-0762 | CROT      | ENST00000331536 | p.K375E  | c.1123A>G | Verified   | GAG | AAA | GTT | 1 | A | G |
| TCGA-04-1362 | CSGALNACT | ENST00000332246 | p.D219G  | c.656A>G  | Verified   | AGG | GAC | AAA | 2 | A | G |
| TCGA-61-1904 | CSH1      | ENST00000316193 | p.E145G  | c.434A>G  | Unverified | GAG | GAA | GGC | 2 | A | G |
| TCGA-13-0924 | CSMD3     | ENST00000297405 | p.D2079G | c.6236A>G | Verified   | tgt | gat | caa | 2 | A | G |
| TCGA-29-1776 | CSN1S1    | ENST00000246891 | p.E35G   | c.104A>G  | Unverified | AGT | GAG | CCT | 2 | A | G |
| TCGA-29-1699 | CSN2      | ENST00000353151 | p.I210V  | c.628A>G  | Unverified | CAG | ATC | TAC | 1 | A | G |
| TCGA-24-1849 | CTH       | ENST00000370938 | p.H324R  | c.971A>G  | Unverified | CAG | CAT | GCT | 2 | A | G |
| TCGA-13-0887 | CTNND2    | ENST00000304623 | p.R196R  | c.588A>G  | Verified   | gcc | cga | gct | 3 | A | G |
| TCGA-61-2008 | CUL2      | ENST00000374751 | p.S524S  | c.1572A>G | Verified   | cct | tca | tct | 3 | A | G |
| TCGA-29-1766 | CYBB      | ENST00000378588 | p.Q311R  | c.932A>G  | Unverified | cta | cag | atg | 2 | A | G |
| TCGA-13-0923 | CYP2C19   | ENST00000371321 | p.Q324R  | c.971A>G  | Verified   | GTC | CAG | GAA | 2 | A | G |
| TCGA-61-1915 | CYSLTR1   | ENST00000373304 | p.T308T  | c.924A>G  | Unverified | tct | aca | ttc | 3 | A | G |
| TCGA-10-0930 | DCAF15    | ENST00000254337 | p.T447T  | c.1341A>G | Unverified | CTC | ACA | CTA | 3 | A | G |
| TCGA-10-0930 | DCAF15    | ENST00000254337 | p.T447T  | c.1341A>G | Unverified | CTC | ACA | CTA | 3 | A | G |
| TCGA-24-2262 | DCDC2     | ENST00000378454 | p.Q91R   | c.272A>G  | Verified   | GGC | CAG | GAA | 2 | A | G |
| TCGA-29-1693 | DEFB127   | ENST00000382388 | p.K14E   | c.40A>G   | Unverified | CAG | AAA | CCC | 1 | A | G |
| TCGA-61-2012 | DIO3      | ENST00000359323 | p.S240G  | c.718A>G  | Unverified | CAG | AGT | GGC | 1 | A | G |
| TCGA-04-1367 | DLG1      | ENST00000346964 | p.K760E  | c.2278A>G | Verified   | GAC | AAA | TTT | 1 | A | G |
| TCGA-29-1769 | DNAH11    | ENST00000328843 | p.N979D  | c.2935A>G | Unverified | TGC | AAT | AGT | 1 | A | G |
| TCGA-04-1367 | DNAH3     | ENST00000261383 | p.M2246V | c.6736A>G | Verified   | AAG | ATG | CTG | 1 | A | G |
| TCGA-24-1470 | DNAH5     | ENST00000265104 | p.S2616G | c.7846A>G | Verified   | AAG | AGT | CTG | 1 | A | G |
| TCGA-29-1703 | DNAJC1    | ENST00000376980 | p.Q395R  | c.1184A>G | Unverified | gtt | cag | aat | 2 | A | G |
| TCGA-29-1764 | DNAJC6    | ENST00000395325 | p.R32G   | c.94A>G   | Unverified | ggg | agg | ctc | 1 | A | G |

|              |            |                 |          |            |            |     |     |     |   |   |   |
|--------------|------------|-----------------|----------|------------|------------|-----|-----|-----|---|---|---|
| TCGA-24-2035 | DNMT1      | ENST00000340748 | p.T523A  | c.1567A>G  | Verified   | TCG | ACC | TAT | 1 | A | G |
| TCGA-61-2095 | DNTTIP1    | ENST00000372622 | p.Q124R  | c.371A>G   | Unverified | GAG | CAG | GCT | 2 | A | G |
| TCGA-24-1103 | DOCK11     | ENST00000276202 | p.K234E  | c.700A>G   | Verified   | CCC | AAA | ATG | 1 | A | G |
| TCGA-23-1114 | DPPA3      | ENST00000345088 | p.D153G  | c.458A>G   | Unverified | caa | gac | acc | 2 | A | G |
| TCGA-13-0916 | DSC1       | ENST00000257197 | p.E188G  | c.563A>G   | Verified   | ATA | GAG | AAA | 2 | A | G |
| TCGA-23-1809 | DSC2       | ENST00000280904 | p.T362T  | c.1086A>G  | Unverified | GTG | ACA | TCA | 3 | A | G |
| TCGA-23-1809 | DSC2_ENST0 | ENST00000251081 | p.T362T  | c.1086A>G  | Unverified | GTG | ACA | TCA | 3 | A | G |
| TCGA-13-0886 | DST        | ENST00000370765 | p.D696G  | c.2087A>G  | Verified   | GAA | GAT | AGC | 2 | A | G |
| TCGA-09-2051 | DST_ENST0  | ENST00000370769 | p.I6046V | c.18136A>G | Unverified | GCC | ATT | TCT | 1 | A | G |
| TCGA-13-0886 | DST_ENST0  | ENST00000370769 | p.D1022G | c.3065A>G  | Verified   | GAA | GAT | AGC | 2 | A | G |
| TCGA-25-1313 | DYNC2H1_E  | ENST00000398093 | p.G117G  | c.351A>G   | Verified   | AGA | GGA | TAT | 3 | A | G |
| TCGA-24-1474 | EBF3       | ENST00000368648 | p.S162G  | c.484A>G   | Unverified | TGC | AGC | CGG | 1 | A | G |
| TCGA-24-2290 | ECH1       | ENST00000221418 | p.S28G   | c.82A>G    | Verified   | CTC | AGT | ATT | 1 | A | G |
| TCGA-24-2290 | ECH1       | ENST00000221418 | p.S28G   | c.82A>G    | Verified   | CTC | AGT | ATT | 1 | A | G |
| TCGA-24-1431 | ECM1       | ENST00000369047 | p.P196P  | c.588A>G   | Verified   | CTA | CCA | CAG | 3 | A | G |
| TCGA-24-0979 | EDDM3B     | ENST00000326783 | p.K26E   | c.76A>G    | Verified   | AGC | AAA | GAA | 1 | A | G |
| TCGA-29-1705 | EDIL3      | ENST00000296591 | p.D440G  | c.1319A>G  | Unverified | aat | gac | act | 2 | A | G |
| TCGA-24-0975 | EED        | ENST00000263360 | p.P60P   | c.180A>G   | Unverified | acg | cca | aat | 3 | A | G |
| TCGA-13-1501 | EGFR       | ENST00000275493 | p.Q1164R | c.3491A>G  | Verified   | CAC | CAA | ATT | 2 | A | G |
| TCGA-13-1501 | EGFR       | ENST00000275493 | p.Q1164R | c.3491A>G  | Verified   | CAC | CAA | ATT | 2 | A | G |
| TCGA-61-1899 | EHD3       | ENST00000322054 | p.I338V  | c.1012A>G  | Unverified | GAG | ATC | TAT | 1 | A | G |
| TCGA-24-1469 | EIF2B5     | ENST00000273783 | p.N263D  | c.787A>G   | Verified   | GAC | AAC | TTT | 1 | A | G |
| TCGA-13-0923 | EIF2C4     | ENST00000373210 | p.K250E  | c.748A>G   | Verified   | ACC | AAA | GAA | 1 | A | G |
| TCGA-29-1702 | EMB        | ENST00000303221 | p.I131V  | c.391A>G   | Unverified | ACC | ATC | ATT | 1 | A | G |
| TCGA-13-1509 | EML5       | ENST00000554922 | p.P268P  | c.804A>G   | Verified   | AAA | CCA | ATT | 3 | A | G |
| TCGA-24-1563 | EMR1       | ENST00000312053 | p.I533V  | c.1597A>G  | Verified   | ATC | ATC | TAC | 1 | A | G |
| TCGA-29-1777 | ENSG00000  | ENST00000329762 | p.M292V  | c.874A>G   | Unverified | ATC | ATG | GTC | 1 | A | G |
| TCGA-09-1674 | ENSG00000  | ENST00000356920 | p.E783G  | c.2348A>G  | Unverified | ATG | GAG | AAG | 2 | A | G |
| TCGA-10-0930 | ENSG00000  | ENST00000338994 | p.T72T   | c.216A>G   | Verified   | CAC | ACA | TAC | 3 | A | G |
| TCGA-10-0930 | ENSG00000  | ENST00000338994 | p.T72T   | c.216A>G   | Verified   | CAC | ACA | TAC | 3 | A | G |
| TCGA-30-1718 | ENSG00000  | ENST00000430863 | p.M760V  | c.2278A>G  | Unverified | GAG | ATG | CTG | 1 | A | G |
| TCGA-61-1904 | ENTHD1     | ENST00000325157 | p.H92R   | c.275A>G   | Unverified | CAG | CAT | TGC | 2 | A | G |
| TCGA-24-1422 | EPB41L3    | ENST00000341928 | p.T919A  | c.2755A>G  | Verified   | GAG | ACA | GCC | 1 | A | G |
| TCGA-10-0930 | EPHA6      | SU_EPHA6        | p.T72T   | c.216A>G   | Verified   | cac | aca | tac | 3 | A | G |



|              |            |                 |          |            |            |     |     |     |   |   |   |
|--------------|------------|-----------------|----------|------------|------------|-----|-----|-----|---|---|---|
| TCGA-10-0930 | EPHA6      | SU_EPHA6        | p.T72T   | c.216A>G   | Verified   | cac | aca | tac | 3 | A | G |
| TCGA-23-1809 | EPHX2      | ENST00000521400 | p.I511V  | c.1531A>G  | Unverified | TGG | ATT | CCC | 1 | A | G |
| TCGA-24-1849 | ESPL1      | ENST00000257934 | p.D1403G | c.4208A>G  | Unverified | GAA | GAC | CCT | 2 | A | G |
| TCGA-04-1367 | ESPN       | ENST00000377828 | p.D205G  | c.614A>G   | Unverified | CAC | GAC | GGC | 2 | A | G |
| TCGA-29-2427 | EWSR1      | ENST00000397938 | p.T414A  | c.1240A>G  | Verified   | GCC | ACA | GTG | 1 | A | G |
| TCGA-13-1507 | EXOC4      | ENST00000253861 | p.D643G  | c.1928A>G  | Verified   | GAT | GAT | GAT | 2 | A | G |
| TCGA-04-1336 | EXOC5      | ENST00000413566 | p.?      | c.939-2A>G | Verified   | ACA | AGA | ACC | 3 | A | G |
| TCGA-23-1114 | F13B       | ENST00000367412 | p.E590G  | c.1769A>G  | Unverified | ATG | GAA | AAG | 2 | A | G |
| TCGA-24-2035 | FAM55C     | ENST00000273347 | p.I412V  | c.1234A>G  | Verified   | CCC | ATC | CGC | 1 | A | G |
| TCGA-13-0906 | FANCA      | ENST00000389301 | p.S1094G | c.3280A>G  | Verified   | AGC | AGC | TTC | 1 | A | G |
| TCGA-13-1496 | FANCI      | ENST00000300027 | p.D611G  | c.1832A>G  | Verified   | TAT | GAT | GTT | 2 | A | G |
| TCGA-61-1910 | FAT4       | ENST00000330166 | p.P994P  | c.2982A>G  | Unverified | TCA | CCA | GTG | 3 | A | G |
| TCGA-61-1910 | FAT4_ENSTC | ENST00000394329 | p.P994P  | c.2982A>G  | Unverified | TCA | CCA | GTG | 3 | A | G |
| TCGA-04-1347 | FGGY       | ENST00000315089 | p.D438G  | c.1313A>G  | Verified   | AAT | GAT | GAC | 2 | A | G |
| TCGA-29-1690 | FLG        | ENST00000368799 | p.D2936G | c.8807A>G  | Unverified | GAA | GAC | AGA | 2 | A | G |
| TCGA-13-1481 | FLG2       | ENST00000388718 | p.H1454R | c.4361A>G  | Verified   | CAA | CAT | GGA | 2 | A | G |
| TCGA-13-0906 | FLG2       | ENST00000388718 | p.T2241T | c.6723A>G  | Unverified | TCC | ACA | CAG | 3 | A | G |
| TCGA-61-2009 | FLJ35880   | ENST00000312481 | p.Q77R   | c.230A>G   | Verified   | AAC | CAA | CTC | 2 | A | G |
| TCGA-30-1718 | FLJ43860   | ENST00000599122 | p.M760V  | c.2278A>G  | Unverified | GAG | ATG | CTG | 1 | A | G |
| TCGA-24-1845 | FMO4       | ENST00000367749 | p.T381T  | c.1143A>G  | Unverified | ggc | aca | gag | 3 | A | G |
| TCGA-13-1481 | FRMD6      | ENST00000395718 | p.D538G  | c.1613A>G  | Verified   | CTC | GAT | GAC | 2 | A | G |
| TCGA-29-1690 | FRMPD3     | XM_042978.4     | p.P1421P | c.4263A>G  | Unverified | ggc | cca | ggc | 3 | A | G |
| TCGA-29-1690 | FRMPD3_EM  | ENST00000276185 | p.P1372P | c.4116A>G  | Unverified | GGC | CCA | GGC | 3 | A | G |
| TCGA-13-0885 | FSHB       | ENST00000254122 | p.K72E   | c.214A>G   | Verified   | TTC | AAG | GAA | 1 | A | G |
| TCGA-23-1114 | FUNDC2     | ENST00000369498 | p.G181G  | c.543A>G   | Unverified | ttc | gga | ggc | 3 | A | G |
| TCGA-30-1855 | FYCO1      | ENST00000296137 | p.Q1111R | c.3332A>G  | Unverified | TGC | CAG | GAG | 2 | A | G |
| TCGA-04-1338 | GABARAPL2  | ENST00000037243 | p.N113D  | c.337A>G   | Verified   | GAG | AAC | ACT | 1 | A | G |
| TCGA-24-0979 | GABRA6     | ENST00000274545 | p.Q259R  | c.776A>G   | Verified   | TCC | CAG | GTG | 2 | A | G |
| TCGA-61-2113 | GADD45A    | ENST00000370986 | p.E100G  | c.299A>G   | Unverified | gcg | gag | ctc | 2 | A | G |
| TCGA-13-0887 | GALNTL5    | ENST00000392800 | p.G359G  | c.1077A>G  | Verified   | GTA | GGA | CAT | 3 | A | G |
| TCGA-25-1326 | GALR1      | ENST00000299727 | p.H289R  | c.866A>G   | Unverified | GCC | CAC | TGC | 2 | A | G |
| TCGA-29-1705 | GAPVD1     | ENST00000394105 | p.T354A  | c.1060A>G  | Unverified | ATG | ACT | GGC | 1 | A | G |
| TCGA-09-2050 | GCLC       | ENST00000229416 | p.R307R  | c.921A>G   | Verified   | GAT | AGA | ACT | 3 | A | G |
| TCGA-24-1563 | GFM1       | ENST00000486715 | p.I238V  | c.712A>G   | Verified   | GAG | ATT | CCA | 1 | A | G |

|              |            |                     |          |           |            |     |     |     |   |   |   |
|--------------|------------|---------------------|----------|-----------|------------|-----|-----|-----|---|---|---|
| TCGA-23-1116 | GJD2       | ENST00000290374     | p.T44A   | c.130A>G  | Unverified | GAG | ACG | GTG | 1 | A | G |
| TCGA-29-1698 | GK5        | ENST00000392993     | p.R144R  | c.432A>G  | Unverified | TGC | CGA | GTG | 3 | A | G |
| TCGA-29-1705 | GLDN       | ENST00000335449     | p.G172G  | c.516A>G  | Unverified | AAA | GGA | GCA | 3 | A | G |
| TCGA-29-1768 | GLI2       | ENST00000361492     | p.R146G  | c.436A>G  | Unverified | GCC | AGG | GGC | 1 | A | G |
| TCGA-24-1844 | GMPS       | ENST00000496455     | p.P513P  | c.1539A>G | Unverified | ctg | cca | att | 3 | A | G |
| TCGA-29-1776 | GNAS_ENST  | ENST00000371100     | p.G578G  | c.1734A>G | Unverified | AGC | GGA | GAC | 3 | A | G |
| TCGA-13-0792 | GOLGA1     | ENST00000373555     | p.E662G  | c.1985A>G | Verified   | AAT | GAG | CTC | 2 | A | G |
| TCGA-23-1032 | GPC5       | ENST00000377067     | p.E365G  | c.1094A>G | Verified   | AAA | GAG | AAG | 2 | A | G |
| TCGA-29-1761 | GPNMB      | ENST00000381990     | p.R455R  | c.1365A>G | Unverified | GTG | AGA | CGA | 3 | A | G |
| TCGA-61-2008 | GPRIN3     | ENST00000333209     | p.I394V  | c.1180A>G | Unverified | CAC | ATT | CAG | 1 | A | G |
| TCGA-13-0923 | GRIA3      | NM_000828.2         | p.R328R  | c.984A>G  | Verified   | cag | cga | gta | 3 | A | G |
| TCGA-13-0923 | GRIA3_ENST | ENST00000264357     | p.R328R  | c.984A>G  | Verified   | CAG | CGA | GTA | 3 | A | G |
| TCGA-13-0762 | GRID1      | ENST00000327946     | p.P560P  | c.1680A>G | Verified   | GCT | CCA | TTT | 3 | A | G |
| TCGA-13-0762 | GRID1      | ENST00000327946     | p.P560P  | c.1680A>G | Verified   | GCT | CCA | TTT | 3 | A | G |
| TCGA-23-1032 | GRM3       | ENST00000361669     | p.T725T  | c.2175A>G | Verified   | GAA | ACA | GTC | 3 | A | G |
| TCGA-23-1118 | HCFC1      | NM_005334.1         | p.S645G  | c.1933A>G | Verified   | gcc | agt | ggg | 1 | A | G |
| TCGA-13-0906 | HECW1      | ENST00000395891     | p.E477G  | c.1430A>G | Verified   | GGT | GAA | GCC | 2 | A | G |
| TCGA-13-0923 | HERPUD2    | ENST00000396081     | p.E255G  | c.764A>G  | Verified   | AAT | GAG | AAT | 2 | A | G |
| TCGA-13-0885 | HHATL      | ENST00000310417     | p.E501G  | c.1502A>G | Verified   | AAA | GAG | AAG | 2 | A | G |
| TCGA-23-1124 | HHEX       | ENST00000282728     | p.I250V  | c.748A>G  | Verified   | gag | att | tca | 1 | A | G |
| TCGA-04-1347 | HIST1H2BG  | ENST00000244601     | p.K17E   | c.49A>G   | Verified   | AAG | AAG | GCT | 1 | A | G |
| TCGA-04-1338 | HKDC1      | ENST00000354624     | p.I545V  | c.1633A>G | Verified   | AAG | ATC | AGA | 1 | A | G |
| TCGA-04-1362 | HOXA2      | ENST00000222718     | p.S358G  | c.1072A>G | Verified   | GAC | AGC | TTA | 1 | A | G |
| TCGA-24-2280 | HOXC9      | ENST00000303450     | p.R243R  | c.729A>G  | Unverified | AAT | CGA | AGG | 3 | A | G |
| TCGA-23-1110 | HRC        | ENST00000252825     | p.S401G  | c.1201A>G | Verified   | AAG | AGT | GAT | 1 | A | G |
| TCGA-29-1785 | HSD17B3    | ENST00000375263     | p.P228P  | c.684A>G  | Unverified | ACC | CCA | TAT | 3 | A | G |
| TCGA-29-1785 | HSD17B3    | ENST00000375263     | p.P228P  | c.684A>G  | Unverified | ACC | CCA | TAT | 3 | A | G |
| TCGA-29-1693 | HSPA6      | NM_002155.3         | p.Q158R  | c.473A>G  | Unverified | cgc | cag | gcc | 2 | A | G |
| TCGA-23-1022 | HSPG2      | ENST00000374695     | p.M804V  | c.2410A>G | Verified   | GCC | ATG | AAG | 1 | A | G |
| TCGA-36-1577 | HUWE1      | XM_497119.1         | p.H2999R | c.8996A>G | Unverified | atg | cat | gag | 2 | A | G |
| TCGA-24-1843 | HYDIN      | ENST00000321489     | p.E282G  | c.845A>G  | Unverified | GGT | GAA | AAG | 2 | A | G |
| TCGA-24-1843 | HYDIN_ENST | ENST00000316490_v65 | p.E282G  | c.845A>G  | Unverified | GGT | GAA | AAG | 2 | A | G |
| TCGA-24-1843 | HYDIN_ENST | ENST00000393550     | p.E282G  | c.845A>G  | Unverified | GGT | GAA | AAG | 2 | A | G |
| TCGA-24-1843 | HYDIN_ENST | ENST00000538248     | p.E309G  | c.926A>G  | Unverified | GGT | GAA | AAG | 2 | A | G |

|              |            |                 |          |           |            |     |     |     |   |   |   |
|--------------|------------|-----------------|----------|-----------|------------|-----|-----|-----|---|---|---|
| TCGA-13-0900 | ID1        | ENST00000376112 | p.D100G  | c.299A>G  | Verified   | atc | gac | tac | 2 | A | G |
| TCGA-24-2267 | IFIH1      | ENST00000263642 | p.K351E  | c.1051A>G | Verified   | AAG | AAA | AAA | 1 | A | G |
| TCGA-13-0913 | IGSF1      | ENST00000361420 | p.E242G  | c.725A>G  | Verified   | GGA | GAA | AGC | 2 | A | G |
| TCGA-09-2049 | IGSF10     | ENST00000282466 | p.Q431R  | c.1292A>G | Verified   | ATG | CAA | GAC | 2 | A | G |
| TCGA-13-0885 | IL7R       | ENST00000303115 | p.T410A  | c.1228A>G | Verified   | GGG | ACT | ACA | 1 | A | G |
| TCGA-24-1846 | IL9R       | ENST00000244174 | p.M507V  | c.1519A>G | Unverified | GGC | ATG | TTG | 1 | A | G |
| TCGA-29-1761 | ILD2R      | ENST00000271417 | p.R326G  | c.976A>G  | Unverified | GCC | AGA | AGG | 1 | A | G |
| TCGA-61-1906 | INO80      | ENST00000361937 | p.T682A  | c.2044A>G | Unverified | GGG | ACC | CCA | 1 | A | G |
| TCGA-61-1906 | INO80      | ENST00000361937 | p.T682A  | c.2044A>G | Unverified | GGG | ACC | CCA | 1 | A | G |
| TCGA-61-1906 | INOC1      | ENST00000361937 | p.T682A  | c.2044A>G | Unverified | ggg | acc | cca | 1 | A | G |
| TCGA-61-1906 | INOC1      | ENST00000361937 | p.T682A  | c.2044A>G | Unverified | ggg | acc | cca | 1 | A | G |
| TCGA-13-0903 | IQGAP1     | ENST00000268182 | p.Q954R  | c.2861A>G | Verified   | AAA | CAG | AAG | 2 | A | G |
| TCGA-25-1313 | IRAK4_ENST | ENST00000448290 | p.I53V   | c.157A>G  | Verified   | CAC | ATA | AGG | 1 | A | G |
| TCGA-13-0919 | IRS1       | ENST00000305123 | p.D731G  | c.2192A>G | Unverified | ggt | gac | tac | 2 | A | G |
| TCGA-04-1343 | ITGA8      | ENST00000378076 | p.T162A  | c.484A>G  | Verified   | CCG | ACA | CCA | 1 | A | G |
| TCGA-13-1497 | ITPR1      | ENST00000456211 | p.P1841P | c.5523A>G | Verified   | GCC | CCA | TCA | 3 | A | G |
| TCGA-13-0793 | ITPR2      | ENST00000381340 | p.I405V  | c.1213A>G | Verified   | CCC | ATA | GAC | 1 | A | G |
| TCGA-24-1616 | IVD        | ENST00000487418 | p.T55A   | c.163A>G  | Verified   | CAG | ACC | ATG | 1 | A | G |
| TCGA-61-2095 | JAKMIP3    | ENST00000298622 | p.M705V  | c.2113A>G | Unverified | AAG | ATG | GTG | 1 | A | G |
| TCGA-09-1665 | KAL1       | ENST00000262648 | p.K98E   | c.292A>G  | Verified   | AGG | AAA | CAC | 1 | A | G |
| TCGA-13-0793 | KALRN      | ENST00000240874 | p.N1524D | c.4570A>G | Unverified | AAG | AAC | AAG | 1 | A | G |
| TCGA-24-1422 | KANK4      | ENST00000371153 | p.A84A   | c.252A>G  | Verified   | CCT | GCA | GCC | 3 | A | G |
| TCGA-04-1337 | KCNA4      | ENST00000328224 | p.T200A  | c.598A>G  | Unverified | GAG | ACT | TTG | 1 | A | G |
| TCGA-29-1691 | KCNC4      | ENST00000369787 | p.K493E  | c.1477A>G | Unverified | CGG | AAG | AAG | 1 | A | G |
| TCGA-29-1691 | KCNC4_ENS  | ENST00000438661 | p.K493E  | c.1477A>G | Unverified | CGG | AAG | AAG | 1 | A | G |
| TCGA-24-1849 | KCNH7      | ENST00000332142 | p.E480G  | c.1439A>G | Unverified | GAA | GAA | GTG | 2 | A | G |
| TCGA-24-1849 | KCNH7_ENS  | ENST00000328032 | p.E473G  | c.1418A>G | Unverified | GAA | GAA | GTG | 2 | A | G |
| TCGA-09-1665 | KDM3B      | ENST00000314358 | p.H83R   | c.248A>G  | Unverified | GTT | CAT | GCT | 2 | A | G |
| TCGA-13-1481 | KHDRBS3    | ENST00000355849 | p.H306R  | c.917A>G  | Verified   | GGA | CAT | GGA | 2 | A | G |
| TCGA-29-2427 | KIAA0174   | ENST00000329908 | p.G142G  | c.426A>G  | Verified   | ATT | GGA | ACT | 3 | A | G |
| TCGA-23-1031 | KIAA0586   | ENST00000354386 | p.D924G  | c.2771A>G | Verified   | TTT | GAT | GAA | 2 | A | G |
| TCGA-23-1123 | KIAA1404   | ENST00000396105 | p.R1180G | c.3538A>G | Verified   | GTC | AGG | GTC | 1 | A | G |
| TCGA-23-1123 | KIAA1404   | ENST00000396105 | p.R1180G | c.3538A>G | Verified   | GTC | AGG | GTC | 1 | A | G |
| TCGA-13-0923 | KIAA1715   | ENST00000272748 | p.R251R  | c.753A>G  | Verified   | CCC | CGA | GAA | 3 | A | G |

|              |           |                 |          |           |            |     |     |     |   |   |   |
|--------------|-----------|-----------------|----------|-----------|------------|-----|-----|-----|---|---|---|
| TCGA-24-1103 | KIAA2022  | ENST00000373468 | p.E1468G | c.4403A>G | Verified   | atg | gag | cga | 2 | A | G |
| TCGA-24-1616 | KIDINS220 | ENST00000256707 | p.R604R  | c.1812A>G | Verified   | AAT | AGA | CTG | 3 | A | G |
| TCGA-10-0930 | KIF18B    | ENST00000339151 | p.T322A  | c.964A>G  | Verified   | CGC | ACA | GTG | 1 | A | G |
| TCGA-10-0930 | KIF18B    | ENST00000339151 | p.T322A  | c.964A>G  | Verified   | CGC | ACA | GTG | 1 | A | G |
| TCGA-13-0760 | KIF4A     | ENST00000374403 | p.P502P  | c.1506A>G | Verified   | agt | cca | gag | 3 | A | G |
| TCGA-23-1120 | KIT       | ENST00000288135 | p.T22A   | c.64A>G   | Unverified | cag | aca | ggc | 1 | A | G |
| TCGA-23-1124 | KLF12     | ENST00000377669 | p.K335E  | c.1003A>G | Verified   | CTG | AAG | GCT | 1 | A | G |
| TCGA-13-0924 | KLHL25    | ENST00000337975 | p.I568V  | c.1702A>G | Verified   | TGC | ATC | ACC | 1 | A | G |
| TCGA-25-2392 | KLHL32    | ENST00000369261 | p.H338R  | c.1013A>G | Verified   | AGC | CAC | CAT | 2 | A | G |
| TCGA-13-0755 | KRI1      | ENST00000312962 | p.R334G  | c.1000A>G | Verified   | CGC | AGA | AAG | 1 | A | G |
| TCGA-29-1711 | KRT3      | ENST00000417996 | p.D340G  | c.1019A>G | Unverified | TAC | GAC | GCT | 2 | A | G |
| TCGA-29-1711 | KRT3      | ENST00000417996 | p.D340G  | c.1019A>G | Unverified | TAC | GAC | GCT | 2 | A | G |
| TCGA-20-1685 | KRTAP13-4 | ENST00000334068 | p.P149P  | c.447A>G  | Unverified | AGA | CCA | ATC | 3 | A | G |
| TCGA-20-1687 | KRTAP5-5  | ENST00000399676 | p.G29G   | c.87A>G   | Unverified | TGT | GGA | GGC | 3 | A | G |
| TCGA-29-1705 | LAMA3     | ENST00000313654 | p.S3118G | c.9352A>G | Unverified | aag | agc | ctc | 1 | A | G |
| TCGA-29-1705 | LAMA3_ENS | ENST00000269217 | p.S1509G | c.4525A>G | Unverified | AAG | AGC | CTC | 1 | A | G |
| TCGA-24-1844 | LARP7     | ENST00000324052 | p.K221E  | c.661A>G  | Unverified | AAG | AAA | AAG | 1 | A | G |
| TCGA-13-0905 | LAS1L     | ENST00000374811 | p.E556G  | c.1667A>G | Verified   | cag | gag | gag | 2 | A | G |
| TCGA-61-1733 | LAX1      | ENST00000442561 | p.S303G  | c.907A>G  | Unverified | CCC | AGT | GGA | 1 | A | G |
| TCGA-61-1733 | LAX1      | ENST00000442561 | p.S303G  | c.907A>G  | Unverified | CCC | AGT | GGA | 1 | A | G |
| TCGA-25-1326 | LGR6      | ENST00000367278 | p.D536G  | c.1607A>G | Verified   | GAG | GAC | TCA | 2 | A | G |
| TCGA-04-1542 | LHX9      | ENST00000367387 | p.R40G   | c.118A>G  | Verified   | CGC | AGA | TCC | 1 | A | G |
| TCGA-23-1118 | LILRA2    | ENST00000251376 | p.I179V  | c.535A>G  | Verified   | GCC | ATC | TTC | 1 | A | G |
| TCGA-20-0990 | LINGO2    | ENST00000379992 | p.D146G  | c.437A>G  | Verified   | CTA | GAC | TAC | 2 | A | G |
| TCGA-24-2267 | LINGO4    | ENST00000368820 | p.A425A  | c.1275A>G | Unverified | ATT | GCA | GAG | 3 | A | G |
| TCGA-20-0991 | LMNB1     | ENST00000261366 | p.E567G  | c.1700A>G | Unverified | gag | gaa | gaa | 2 | A | G |
| TCGA-29-1691 | LOC152485 | ENST00000379448 | p.Q8R    | c.23A>G   | Unverified | GAG | CAG | CCC | 2 | A | G |
| TCGA-24-1843 | LOC652153 | ENST00000316490 | p.E282G  | c.845A>G  | Unverified | GGT | GAA | AAG | 2 | A | G |
| TCGA-24-1422 | LOC652153 | ENST00000316490 | p.A1197A | c.3591A>G | Verified   | CCA | GCA | ATC | 3 | A | G |
| TCGA-20-1683 | LONRF3    | ENST00000365713 | p.R551R  | c.1653A>G | Unverified | acg | aga | cag | 3 | A | G |
| TCGA-20-1683 | LONRF3_EN | ENST00000371628 | p.R592R  | c.1776A>G | Unverified | ACG | AGA | CAG | 3 | A | G |
| TCGA-30-1855 | LPAR1     | ENST00000374430 | p.D315G  | c.944A>G  | Unverified | CGC | GAC | AAA | 2 | A | G |
| TCGA-23-1110 | LPIN1     | ENST00000256720 | p.Q654R  | c.1961A>G | Verified   | ACG | CAG | TAC | 2 | A | G |
| TCGA-24-1463 | LRCH1     | ENST00000389798 | p.K244E  | c.730A>G  | Verified   | AAC | AAA | GTG | 1 | A | G |

|              |           |                     |          |            |            |     |     |     |   |   |   |
|--------------|-----------|---------------------|----------|------------|------------|-----|-----|-----|---|---|---|
| TCGA-09-2050 | LRCH2     | NM_020871.2         | p.S320S  | c.960A>G   | Verified   | cca | tca | ttg | 3 | A | G |
| TCGA-29-1762 | LRCH2     | NM_020871.2         | p.S327S  | c.981A>G   | Unverified | ccc | tca | cag | 3 | A | G |
| TCGA-29-1762 | LRCH2_ENS | ENST00000317135     | p.S327S  | c.981A>G   | Unverified | CCC | TCA | CAG | 3 | A | G |
| TCGA-23-1117 | LRP2      | ENST00000263816     | p.E3395G | c.10184A>G | Verified   | TTG | GAG | GGC | 2 | A | G |
| TCGA-23-1117 | LRP2      | ENST00000263816     | p.E3395G | c.10184A>G | Verified   | TTG | GAG | GGC | 2 | A | G |
| TCGA-13-0904 | LRP5      | ENST00000294304     | p.E1094G | c.3281A>G  | Unverified | ATC | GAA | CGC | 2 | A | G |
| TCGA-13-0792 | LRR15     | ENST00000347624     | p.I305V  | c.913A>G   | Verified   | CAC | ATC | TCT | 1 | A | G |
| TCGA-23-1021 | LRR37B    | ENST00000341671     | p.T833T  | c.2499A>G  | Verified   | GAA | ACA | CAT | 3 | A | G |
| TCGA-04-1337 | MAGEC3    | ENST00000298296     | p.E375G  | c.1124A>G  | Unverified | gga | gaa | gat | 2 | A | G |
| TCGA-04-1337 | MAGEC3_EN | ENST00000544766     | p.E77G   | c.230A>G   | Unverified | CCA | GAA | GAT | 2 | A | G |
| TCGA-13-0792 | MAG11_ENS | ENST00000402939     | p.K1288E | c.3862A>G  | Verified   | AGG | AAA | CCC | 1 | A | G |
| TCGA-24-1464 | MAML2     | ENST00000524717     | p.M514V  | c.1540A>G  | Verified   | tac | atg | tac | 1 | A | G |
| TCGA-09-2049 | MAP4K2    | ENST00000294066     | p.R792R  | c.2376A>G  | Verified   | CAC | AGA | GAC | 3 | A | G |
| TCGA-09-2049 | MAP7D1    | ENST00000373151     | p.E796G  | c.2387A>G  | Verified   | CAG | GAG | AAT | 2 | A | G |
| TCGA-13-1509 | MAPKAP1   | ENST00000350766     | p.D376G  | c.1127A>G  | Verified   | ATA | GAC | CCT | 2 | A | G |
| TCGA-13-0920 | MAPRE3    | ENST00000233121     | p.T8T    | c.24A>G    | Verified   | TCC | ACA | TCT | 3 | A | G |
| TCGA-29-1691 | MASP2     | ENST00000400897     | p.D120G  | c.359A>G   | Unverified | TCC | GAC | TAC | 2 | A | G |
| TCGA-23-2077 | MAST1     | ENST00000251472     | p.D872G  | c.2615A>G  | Verified   | GGG | GAT | GCA | 2 | A | G |
| TCGA-13-0923 | MCHR2     | ENST00000369212     | p.Q314R  | c.941A>G   | Verified   | TTC | CAG | AAA | 2 | A | G |
| TCGA-29-1691 | MCM10_EN  | ENST00000361282     | p.E264G  | c.791A>G   | Unverified | ACA | GAA | ATG | 2 | A | G |
| TCGA-13-0792 | MCM2      | ENST00000265056     | p.M167V  | c.499A>G   | Verified   | GAG | ATG | ATC | 1 | A | G |
| TCGA-09-2049 | MDH1B     | ENST00000374412     | p.G373G  | c.1119A>G  | Verified   | TTT | GGA | GGC | 3 | A | G |
| TCGA-13-1497 | MDS2      | ENST00000374555     | p.S49G   | c.145A>G   | Verified   | CTG | AGC | TGC | 1 | A | G |
| TCGA-10-0930 | MED12L    | ENST00000474524     | p.K758E  | c.2272A>G  | Verified   | AAG | AAG | AGC | 1 | A | G |
| TCGA-10-0930 | MED12L    | ENST00000474524     | p.K758E  | c.2272A>G  | Verified   | AAG | AAG | AGC | 1 | A | G |
| TCGA-30-1718 | MED12L    | ENST00000474524     | p.E1616G | c.4847A>G  | Unverified | TCA | GAA | AGT | 2 | A | G |
| TCGA-09-1674 | MED13L    | ENST00000281928     | p.K81E   | c.241A>G   | Unverified | tgc | aaa | gag | 1 | A | G |
| TCGA-13-0923 | MED17     | ENST00000251871     | p.E252G  | c.755A>G   | Verified   | tta | gag | ggg | 2 | A | G |
| TCGA-61-1725 | MEGF10    | ENST00000274473     | p.N678D  | c.2032A>G  | Unverified | AAC | AAC | GGA | 1 | A | G |
| TCGA-09-2044 | MET       | ENST00000318493     | p.E221G  | c.662A>G   | Verified   | AAG | GAA | ACG | 2 | A | G |
| TCGA-13-1489 | MGAM_ENS  | ENST00000549489     | p.E883G  | c.2648A>G  | Verified   | TTG | GAG | GTG | 2 | A | G |
| TCGA-23-1122 | MLL       | NM_005933.1         | p.E1464G | c.4391A>G  | Verified   | aac | gag | cgc | 2 | A | G |
| TCGA-29-1701 | MLLT10_EN | ENST00000307729     | p.I912V  | c.2734A>G  | Unverified | GGC | ATT | GTA | 1 | A | G |
| TCGA-29-1701 | MLLT10_EN | ENST00000377072_v68 | p.I928V  | c.2782A>G  | Unverified | GGC | ATT | GTA | 1 | A | G |

|              |           |                 |          |           |            |     |     |     |   |   |   |
|--------------|-----------|-----------------|----------|-----------|------------|-----|-----|-----|---|---|---|
| TCGA-13-0760 | MLST8_ENS | ENST00000564088 | p.Q312R  | c.935A>G  | Verified   | CAC | CAG | AAG | 2 | A | G |
| TCGA-24-1417 | MMP16     | ENST00000286614 | p.D89G   | c.266A>G  | Unverified | gtg | gac | aga | 2 | A | G |
| TCGA-29-1711 | MMRN2     | ENST00000372027 | p.Q271R  | c.812A>G  | Unverified | CGC | CAG | GCC | 2 | A | G |
| TCGA-29-1711 | MMRN2     | ENST00000372027 | p.Q271R  | c.812A>G  | Unverified | CGC | CAG | GCC | 2 | A | G |
| TCGA-29-1769 | MTERFD1   | ENST00000287025 | p.S406S  | c.1218A>G | Unverified | GCA | TCA | GTA | 3 | A | G |
| TCGA-61-1737 | MUC15     | ENST00000455601 | p.D326G  | c.977A>G  | Unverified | GAT | GAC | ATA | 2 | A | G |
| TCGA-20-1686 | MUC17     | ENST00000306151 | p.E2118G | c.6353A>G | Unverified | CCT | GAG | GCT | 2 | A | G |
| TCGA-30-1718 | MVP       | ENST00000395353 | p.T256A  | c.766A>G  | Unverified | GAC | ACA | GAG | 1 | A | G |
| TCGA-04-1367 | MYBL1     | ENST00000522677 | p.E716G  | c.2147A>G | Verified   | tgg | gaa | aca | 2 | A | G |
| TCGA-61-1910 | MYH1      | ENST00000226207 | p.K1001E | c.3001A>G | Unverified | AAG | AAG | GCT | 1 | A | G |
| TCGA-04-1652 | MYH1      | ENST00000226207 | p.E1409G | c.4226A>G | Unverified | GTA | GAA | GCT | 2 | A | G |
| TCGA-04-1652 | MYH1      | ENST00000226207 | p.E1409G | c.4226A>G | Unverified | GTA | GAA | GCT | 2 | A | G |
| TCGA-29-1784 | MYH1      | ENST00000226207 | p.E1735G | c.5204A>G | Unverified | CTG | GAG | ACA | 2 | A | G |
| TCGA-13-0795 | MYH3      | ENST00000226209 | p.K568E  | c.1702A>G | Verified   | CCC | AAG | GTG | 1 | A | G |
| TCGA-29-1777 | MYH7      | ENST00000355349 | p.E1507G | c.4520A>G | Unverified | CAG | GAG | GAG | 2 | A | G |
| TCGA-24-2267 | MYO16     | ENST00000357550 | p.T978A  | c.2932A>G | Unverified | ATG | ACA | GCT | 1 | A | G |
| TCGA-61-1904 | MYOM2     | ENST00000262113 | p.T40A   | c.118A>G  | Unverified | TCC | ACC | CAG | 1 | A | G |
| TCGA-13-0887 | MYST4     | ENST00000287239 | p.E1373G | c.4118A>G | Verified   | GAA | GAA | GGA | 2 | A | G |
| TCGA-13-1510 | MYT1      | ENST00000328439 | p.E576G  | c.1727A>G | Unverified | AAG | GAG | CTG | 2 | A | G |
| TCGA-24-1845 | MYT1L     | ENST00000399161 | p.E637G  | c.1910A>G | Unverified | AAG | GAG | CTC | 2 | A | G |
| TCGA-20-1686 | N6AMT1    | ENST00000303775 | p.D161G  | c.482A>G  | Unverified | CCA | GAT | CTC | 2 | A | G |
| TCGA-20-1685 | NAA16     | ENST00000379406 | p.R295R  | c.885A>G  | Unverified | AGA | AGA | TTA | 3 | A | G |
| TCGA-04-1530 | NAV1      | ENST00000367296 | p.K1538E | c.4612A>G | Unverified | CCC | AAG | CCG | 1 | A | G |
| TCGA-61-1910 | NAV3      | NM_014903.3     | p.E803G  | c.2408A>G | Unverified | agt | gag | aaa | 2 | A | G |
| TCGA-23-1123 | NCF2      | ENST00000367536 | p.M150V  | c.448A>G  | Verified   | AGC | ATG | AAG | 1 | A | G |
| TCGA-23-1123 | NCF2      | ENST00000367536 | p.M150V  | c.448A>G  | Verified   | AGC | ATG | AAG | 1 | A | G |
| TCGA-25-1326 | NCKAP1    | ENST00000360982 | p.D1107G | c.3320A>G | Verified   | ATG | GAT | CTT | 2 | A | G |
| TCGA-29-1761 | NCKAP1    | ENST00000360982 | p.S968S  | c.2904A>G | Unverified | TTA | TCA | TCA | 3 | A | G |
| TCGA-24-1423 | NDUFV3    | ENST00000354250 | p.T120A  | c.358A>G  | Verified   | AAG | ACT | TTG | 1 | A | G |
| TCGA-24-1847 | NEK1      | ENST00000507142 | p.D1103G | c.3308A>G | Unverified | CAA | GAC | AAT | 2 | A | G |
| TCGA-24-1847 | NEK1_ENST | ENST00000507142 | p.D1103G | c.3308A>G | Unverified | CAA | GAC | AAT | 2 | A | G |
| TCGA-04-1331 | NEK8      | SU_NEK8         | p.A383A  | c.1149A>G | Unverified | ggg | gca | gtg | 3 | A | G |
| TCGA-13-0919 | NLGN4X    | ENST00000381095 | p.T335A  | c.1003A>G | Unverified | gcc | acc | tac | 1 | A | G |
| TCGA-25-2391 | NLRP4     | ENST00000301295 | p.H532R  | c.1595A>G | Unverified | ATT | CAC | CAG | 2 | A | G |

|              |            |                 |          |           |            |     |     |     |   |   |   |
|--------------|------------|-----------------|----------|-----------|------------|-----|-----|-----|---|---|---|
| TCGA-29-1769 | NLRP7      | ENST00000448121 | p.K808E  | c.2422A>G | Unverified | TGC | AAG | GAC | 1 | A | G |
| TCGA-29-1769 | NLRP7_ENS  | ENST00000328092 | p.K836E  | c.2506A>G | Unverified | TGC | AAG | GAC | 1 | A | G |
| TCGA-13-0885 | NOL6       | ENST00000297990 | p.A643A  | c.1929A>G | Verified   | GAT | GCA | CTT | 3 | A | G |
| TCGA-23-1022 | NPAS2      | ENST00000335681 | p.Q136R  | c.407A>G  | Verified   | GAA | CAA | GAA | 2 | A | G |
| TCGA-04-1361 | NPAT       | ENST00000278612 | p.S1184S | c.3552A>G | Verified   | AAT | TCA | AAA | 3 | A | G |
| TCGA-04-1361 | NPAT       | ENST00000278612 | p.S1184S | c.3552A>G | Verified   | AAT | TCA | AAA | 3 | A | G |
| TCGA-61-1910 | NPY5R      | ENST00000338566 | p.H115R  | c.344A>G  | Unverified | TGC | CAT | ATT | 2 | A | G |
| TCGA-61-2095 | NRAS       | ENST00000369535 | p.Q61R   | c.182A>G  | Verified   | gga | caa | gaa | 2 | A | G |
| TCGA-04-1367 | NRCAM      | ENST00000351718 | p.T690A  | c.2068A>G | Verified   | ACC | ACA | GCC | 1 | A | G |
| TCGA-09-2056 | NT5C1A     | ENST00000235628 | p.N242D  | c.724A>G  | Verified   | GAG | AAC | AAA | 1 | A | G |
| TCGA-61-1910 | NUP155     | ENST00000231498 | p.R563R  | c.1689A>G | Unverified | GAT | AGA | GAA | 3 | A | G |
| TCGA-13-0890 | NUP210L    | ENST00000368559 | p.T400T  | c.1200A>G | Verified   | ATT | ACA | TAC | 3 | A | G |
| TCGA-25-2393 | NXPH1      | ENST00000405863 | p.K117E  | c.349A>G  | Verified   | AAG | AAA | ATG | 1 | A | G |
| TCGA-13-1497 | ODC1       | ENST00000234111 | p.D10G   | c.29A>G   | Verified   | TTT | GAC | TGC | 2 | A | G |
| TCGA-61-1740 | ODZ2_ENST  | ENST00000518659 | p.D410G  | c.1229A>G | Unverified | GCA | GAT | GGG | 2 | A | G |
| TCGA-61-1740 | ODZ2_ENST  | ENST00000519204 | p.D289G  | c.866A>G  | Unverified | GCA | GAT | GGG | 2 | A | G |
| TCGA-23-1021 | OR10J1_ENS | ENST00000328408 | p.S89G   | c.265A>G  | Verified   | CTG | AGT | CAG | 1 | A | G |
| TCGA-29-1775 | OR2AP1     | ENST00000321688 | p.E264G  | c.791A>G  | Unverified | AAA | GAA | GGG | 2 | A | G |
| TCGA-25-2392 | OR2F2      | ENST00000408955 | p.D4G    | c.11A>G   | Verified   | ATA | GAT | AAC | 2 | A | G |
| TCGA-23-1031 | OR2M2      | ENST00000359682 | p.Q6R    | c.17A>G   | Verified   | AAT | CAG | ACC | 2 | A | G |
| TCGA-24-2024 | OR4K13     | ENST00000315693 | p.T288T  | c.864A>G  | Verified   | TAT | ACA | TTA | 3 | A | G |
| TCGA-23-1114 | OR4K14     | ENST00000305045 | p.G97G   | c.291A>G  | Unverified | GGA | GGA | TGT | 3 | A | G |
| TCGA-24-1843 | OR52M1     | ENST00000360213 | p.D123G  | c.368A>G  | Unverified | TTT | GAT | CGC | 2 | A | G |
| TCGA-23-1123 | OR5AK2     | ENST00000326855 | p.I196V  | c.586A>G  | Verified   | AAC | ATC | ATG | 1 | A | G |
| TCGA-23-1123 | OR5AK2     | ENST00000326855 | p.I196V  | c.586A>G  | Verified   | AAC | ATC | ATG | 1 | A | G |
| TCGA-29-1769 | OR5K3      | ENST00000383695 | p.R306R  | c.918A>G  | Unverified | AAG | AGA | AAA | 3 | A | G |
| TCGA-24-2262 | OR5V1      | ENST00000377154 | p.D296G  | c.887A>G  | Verified   | AAG | GAC | ATC | 2 | A | G |
| TCGA-30-1891 | OR6C75     | ENST00000343399 | p.I27V   | c.79A>G   | Unverified | TTC | ATA | TTT | 1 | A | G |
| TCGA-24-2289 | OSBP       | ENST00000263847 | p.S492G  | c.1474A>G | Unverified | acc | agt | aag | 1 | A | G |
| TCGA-23-1124 | OTOP2      | ENST00000331427 | p.T364A  | c.1090A>G | Verified   | CCC | ACG | CGC | 1 | A | G |
| TCGA-09-2044 | PADI3      | ENST00000375460 | p.M180V  | c.538A>G  | Verified   | GAC | ATG | TCT | 1 | A | G |
| TCGA-09-2051 | PALLD      | ENST00000261509 | p.R743R  | c.2229A>G | Unverified | CAG | AGA | CTC | 3 | A | G |
| TCGA-24-2267 | PAPLN      | ENST00000340738 | p.I968V  | c.2902A>G | Unverified | ATC | ATA | GGG | 1 | A | G |
| TCGA-13-1507 | PARP11     | ENST00000228820 | p.K242E  | c.724A>G  | Verified   | TGC | AAA | GAT | 1 | A | G |

|              |            |                 |          |           |            |     |     |     |   |   |   |
|--------------|------------|-----------------|----------|-----------|------------|-----|-----|-----|---|---|---|
| TCGA-23-2078 | PARP4      | ENST00000381989 | p.K429E  | c.1285A>G | Verified   | AGC | AAA | CTT | 1 | A | G |
| TCGA-61-1914 | PCDHGA6_E  | ENST00000517434 | p.Q640R  | c.1919A>G | Unverified | AAG | CAG | AGC | 2 | A | G |
| TCGA-24-1844 | PCDHGA8    | ENST00000398604 | p.A582A  | c.1746A>G | Unverified | TCC | GCA | GAG | 3 | A | G |
| TCGA-29-1691 | PDE6A      | ENST00000255266 | p.K786E  | c.2356A>G | Unverified | TAC | AAG | GAA | 1 | A | G |
| TCGA-24-2024 | PDGFRA     | ENST00000257290 | p.Q431R  | c.1292A>G | Verified   | GGA | CAG | ACG | 2 | A | G |
| TCGA-13-0923 | PDIA4      | ENST00000286091 | p.I107V  | c.319A>G  | Unverified | AAC | ATA | TTA | 1 | A | G |
| TCGA-61-1904 | PDS5B      | ENST00000315596 | p.K627E  | c.1879A>G | Unverified | AAC | AAA | TCA | 1 | A | G |
| TCGA-29-1784 | PER3       | ENST00000361923 | p.K998E  | c.2992A>G | Unverified | ATG | AAG | AAT | 1 | A | G |
| TCGA-61-2109 | PFKL       | NM_001002021.1  | p.M782V  | c.2344A>G | Unverified | cgc | atg | cca | 1 | A | G |
| TCGA-20-1685 | PGLYRP4    | ENST00000359650 | p.R353R  | c.1059A>G | Unverified | GCC | CGA | ACC | 3 | A | G |
| TCGA-61-1740 | PGM2L1     | ENST00000298198 | p.I246V  | c.736A>G  | Unverified | AAG | ATC | TGT | 1 | A | G |
| TCGA-09-2044 | PHF8       | ENST00000338154 | p.Q446R  | c.1337A>G | Verified   | caa | cag | aac | 2 | A | G |
| TCGA-29-1699 | PIGT       | ENST00000279036 | p.D208G  | c.623A>G  | Unverified | GCA | GAT | CGC | 2 | A | G |
| TCGA-29-1699 | PIGT_ENST0 | ENST00000279036 | p.D208G  | c.623A>G  | Unverified | GCA | GAT | CGC | 2 | A | G |
| TCGA-24-1845 | PIK3R5     | ENST00000447110 | p.S297G  | c.889A>G  | Unverified | GAC | AGC | TTT | 1 | A | G |
| TCGA-13-1512 | PKN1       | ENST00000242783 | p.E327G  | c.980A>G  | Verified   | CTG | GAG | GTA | 2 | A | G |
| TCGA-61-2095 | PKNOX1     | ENST00000291547 | p.D433G  | c.1298A>G | Unverified | AGT | GAC | TCC | 2 | A | G |
| TCGA-10-0930 | PLCD4      | ENST00000450993 | p.K435E  | c.1303A>G | Verified   | GGG | AAG | AAG | 1 | A | G |
| TCGA-10-0930 | PLCD4      | ENST00000450993 | p.K435E  | c.1303A>G | Verified   | GGG | AAG | AAG | 1 | A | G |
| TCGA-61-1914 | PLCH1      | ENST00000334686 | p.H341R  | c.1022A>G | Unverified | CAT | CAT | GGT | 2 | A | G |
| TCGA-61-1914 | PLCH1_ENST | ENST00000340059 | p.H359R  | c.1076A>G | Unverified | CAT | CAT | GGT | 2 | A | G |
| TCGA-23-1029 | PLCL1      | NM_006226.1     | p.P636P  | c.1908A>G | Unverified | ttc | cca | aag | 3 | A | G |
| TCGA-23-1029 | PLCL1_ENST | ENST00000428675 | p.P734P  | c.2202A>G | Unverified | TTC | CCA | AAG | 3 | A | G |
| TCGA-29-1699 | PLCXD2     | ENST00000393934 | p.Q74R   | c.221A>G  | Unverified | gac | caa | acc | 2 | A | G |
| TCGA-24-1846 | PLIN2      | ENST00000276914 | p.K344E  | c.1030A>G | Unverified | GCC | AAG | CAC | 1 | A | G |
| TCGA-29-1761 | PLK2       | NM_006622       | p.I157V  | c.469A>G  | Unverified | tac | att | ctc | 1 | A | G |
| TCGA-24-2289 | PLXNA4_EN  | ENST00000321063 | p.T1767A | c.5299A>G | Unverified | ATC | ACA | GAC | 1 | A | G |
| TCGA-61-2008 | PLXNB1     | ENST00000296440 | p.I886V  | c.2656A>G | Unverified | CTC | ATC | CTC | 1 | A | G |
| TCGA-29-1763 | PMEL       | ENST00000552882 | p.T414A  | c.1240A>G | Unverified | ACC | ACA | GCT | 1 | A | G |
| TCGA-29-1699 | PNLIPRP2   | ENST00000298771 | p.A399A  | c.1197A>G | Unverified | GAT | GCA | AGT | 3 | A | G |
| TCGA-29-1699 | PNLIPRP2_E | ENST00000537242 | p.A399A  | c.1197A>G | Unverified | GAT | GCA | AGT | 3 | A | G |
| TCGA-04-1361 | PPIG       | ENST00000260970 | p.S527G  | c.1579A>G | Verified   | AAG | AGT | AAT | 1 | A | G |
| TCGA-04-1361 | PPIG       | ENST00000260970 | p.S527G  | c.1579A>G | Verified   | AAG | AGT | AAT | 1 | A | G |
| TCGA-09-2050 | PPP1R3A    | NM_002711.2     | p.S87G   | c.259A>G  | Verified   | ccg | agt | gct | 1 | A | G |



|              |            |                     |          |           |            |     |     |     |   |   |   |
|--------------|------------|---------------------|----------|-----------|------------|-----|-----|-----|---|---|---|
| TCGA-23-2078 | PQBP1      | ENST00000376563     | p.D129G  | c.386A>G  | Unverified | cac | gac | aag | 2 | A | G |
| TCGA-24-2280 | PRDM15     | ENST00000269844     | p.R881R  | c.2643A>G | Unverified | CGG | CGA | GTG | 3 | A | G |
| TCGA-13-0920 | PRPS1L1    | ENST00000506618     | p.S58G   | c.172A>G  | Verified   | ATC | ATC | ACC | 1 | A | G |
| TCGA-23-1116 | PRTN3      | ENST00000234347     | p.Q78R   | c.233A>G  | Unverified | CCC | CAG | CGC | 2 | A | G |
| TCGA-13-0760 | PSMB6      | ENST00000270586     | p.E103G  | c.308A>G  | Verified   | ATT | GAA | CTG | 2 | A | G |
| TCGA-13-0884 | PTCHD1     | NM_173495.1         | p.T474A  | c.1420A>G | Verified   | tac | acc | aag | 1 | A | G |
| TCGA-23-1031 | PTMA       | ENST00000409115     | p.S2S    | c.6A>G    | Unverified | ATG | TCA | GAC | 3 | A | G |
| TCGA-13-0795 | PTPN5      | ENST00000358540     | p.K329E  | c.985A>G  | Verified   | TAC | AAA | ACC | 1 | A | G |
| TCGA-13-0919 | PTPRS      | ENST00000357368     | p.T996A  | c.2986A>G | Unverified | CTC | ACG | CTG | 1 | A | G |
| TCGA-29-1705 | PTPRS      | ENST00000357368     | p.M16V   | c.46A>G   | Unverified | CCC | ATG | GGC | 1 | A | G |
| TCGA-24-1104 | PTPRT      | NM_133170.2         | p.T1314A | c.3940A>G | Verified   | aag | acc | tcc | 1 | A | G |
| TCGA-04-1652 | PTPRT      | NM_133170.2         | p.E548G  | c.1643A>G | Unverified | aat | gaa | acc | 2 | A | G |
| TCGA-04-1652 | PTPRT      | NM_133170.2         | p.E548G  | c.1643A>G | Unverified | aat | gaa | acc | 2 | A | G |
| TCGA-24-1469 | PUM1       | ENST00000257075     | p.S657G  | c.1969A>G | Verified   | CAG | AGC | AGC | 1 | A | G |
| TCGA-29-1703 | QARS       | ENST00000306125     | p.D170G  | c.509A>G  | Unverified | GTG | GAC | ATG | 2 | A | G |
| TCGA-23-1123 | QRICH1     | ENST00000395443     | p.P698P  | c.2094A>G | Verified   | AAT | CCA | TTG | 3 | A | G |
| TCGA-23-1123 | QRICH1     | ENST00000395443     | p.P698P  | c.2094A>G | Verified   | AAT | CCA | TTG | 3 | A | G |
| TCGA-61-2095 | QRICH2     | ENST00000262765     | p.Q197R  | c.590A>G  | Unverified | GTT | CAA | CAG | 2 | A | G |
| TCGA-25-2392 | QSOX2      | ENST00000358701     | p.E541G  | c.1622A>G | Unverified | CAT | GAG | GAA | 2 | A | G |
| TCGA-04-1338 | RAB41      | ENST00000276066     | p.S197S  | c.591A>G  | Verified   | ACT | TCA | CCT | 3 | A | G |
| TCGA-29-1769 | RAD21      | ENST00000297338     | p.T199A  | c.595A>G  | Unverified | agc | acc | agc | 1 | A | G |
| TCGA-13-0906 | RAPGEF1    | ENST00000372190     | p.K940E  | c.2818A>G | Verified   | cgg | aag | ctg | 1 | A | G |
| TCGA-24-2290 | RBM12      | ENST00000374104     | p.G399G  | c.1197A>G | Verified   | TCT | GGA | CAA | 3 | A | G |
| TCGA-24-2290 | RBM12      | ENST00000374104     | p.G399G  | c.1197A>G | Verified   | TCT | GGA | CAA | 3 | A | G |
| TCGA-23-1116 | RBM38      | ENST00000356208     | p.E89G   | c.266A>G  | Unverified | GCT | GAG | AGG | 2 | A | G |
| TCGA-24-1104 | RGL1       | ENST00000304685     | p.T92T   | c.276A>G  | Verified   | CAC | ACA | GTC | 3 | A | G |
| TCGA-13-1509 | RHBDD1     | ENST00000392062     | p.D262G  | c.785A>G  | Verified   | TAT | GAC | ACG | 2 | A | G |
| TCGA-23-1021 | RIF1       | ENST00000444746     | p.N1387D | c.4159A>G | Verified   | gag | aat | aca | 1 | A | G |
| TCGA-24-1464 | RIOK1      | ENST00000379834     | p.D526G  | c.1577A>G | Verified   | ACG | GAC | CCT | 2 | A | G |
| TCGA-13-1496 | RLF        | ENST00000372771     | p.K1073E | c.3217A>G | Verified   | TTG | AAA | AAC | 1 | A | G |
| TCGA-24-1469 | RNASEL     | ENST00000367559     | p.E676G  | c.2027A>G | Verified   | GAA | GAA | AAG | 2 | A | G |
| TCGA-61-2113 | ROS1       | ENST00000368508     | p.I1399V | c.4195A>G | Verified   | ATC | ATC | ACA | 1 | A | G |
| TCGA-29-1701 | RP11-231C1 | ENST00000524087     | p.H502R  | c.1505A>G | Unverified | GAG | CAT | CTG | 2 | A | G |
| TCGA-29-1701 | RP11-231C1 | ENST00000524087_v68 | p.H502R  | c.1505A>G | Unverified | GAG | CAT | CTG | 2 | A | G |

|              |            |                 |          |           |            |     |     |     |   |   |   |
|--------------|------------|-----------------|----------|-----------|------------|-----|-----|-----|---|---|---|
| TCGA-24-1417 | RPGRIP1_EN | ENST00000400017 | p.M41V   | c.121A>G  | Verified   | AGG | ATG | AAC | 1 | A | G |
| TCGA-25-2392 | RPS6KA3    | ENST00000379565 | p.R337R  | c.1011A>G | Verified   | TAT | AGA | AGA | 3 | A | G |
| TCGA-24-1845 | RPUSD2     | ENST00000315616 | p.H214R  | c.641A>G  | Unverified | AGG | CAT | GAG | 2 | A | G |
| TCGA-04-1356 | RSF1       | ENST00000308488 | p.D1367G | c.4100A>G | Verified   | GTG | GAC | TTA | 2 | A | G |
| TCGA-04-1343 | RUNDC2A    | ENST00000268271 | p.N124D  | c.370A>G  | Verified   | CTC | AAC | GAA | 1 | A | G |
| TCGA-24-1845 | RUNDC2A    | ENST00000268271 | p.Q338R  | c.1013A>G | Unverified | TAC | CAG | AAG | 2 | A | G |
| TCGA-29-1785 | RUVBL2_EN  | ENST00000221413 | p.I348V  | c.1042A>G | Unverified | CCC | ATA | GAC | 1 | A | G |
| TCGA-29-1785 | RUVBL2_EN  | ENST00000221413 | p.I348V  | c.1042A>G | Unverified | CCC | ATA | GAC | 1 | A | G |
| TCGA-13-0900 | S100A7L2   | ENST00000368724 | p.G22G   | c.66A>G   | Verified   | AGT | GGA | GAT | 3 | A | G |
| TCGA-23-1022 | SACS       | NM_014363.3     | p.H1235R | c.3704A>G | Verified   | ata | cat | cat | 2 | A | G |
| TCGA-25-2393 | SCN2A      | ENST00000375427 | p.E518G  | c.1553A>G | Verified   | GAA | GAG | AAA | 2 | A | G |
| TCGA-23-1120 | SCYL1_ENST | ENST00000270176 | p.E690G  | c.2069A>G | Unverified | CCA | GAG | TCC | 2 | A | G |
| TCGA-24-1435 | SEC14L3    | ENST00000215812 | p.T246A  | c.736A>G  | Verified   | CTG | ACT | GAC | 1 | A | G |
| TCGA-10-0930 | SEC14L5    | ENST00000251170 | p.E441G  | c.1322A>G | Unverified | AAT | GAG | AAC | 2 | A | G |
| TCGA-10-0930 | SEC14L5    | ENST00000251170 | p.E441G  | c.1322A>G | Unverified | AAT | GAG | AAC | 2 | A | G |
| TCGA-13-1488 | SECISBP2   | ENST00000375807 | p.R256R  | c.768A>G  | Verified   | CTA | AGA | GAA | 3 | A | G |
| TCGA-29-1764 | SEL1L2     | ENST00000284951 | p.P665P  | c.1995A>G | Unverified | GGA | CCA | CAC | 3 | A | G |
| TCGA-29-1705 | SERPINB4   | ENST00000341074 | p.S36S   | c.108A>G  | Unverified | aca | tca | gca | 3 | A | G |
| TCGA-13-0920 | SF3B2      | ENST00000322535 | p.T599T  | c.1797A>G | Verified   | GAG | ACA | CGA | 3 | A | G |
| TCGA-61-2012 | SGK1       | ENST00000237305 | p.K400E  | c.1198A>G | Unverified | ggc | aag | tcc | 1 | A | G |
| TCGA-13-1488 | SH3BGRL    | ENST00000373212 | p.G33G   | c.99A>G   | Verified   | ata | gga | ttt | 3 | A | G |
| TCGA-23-1114 | SIDT1      | ENST00000264852 | p.I359V  | c.1075A>G | Unverified | CCC | ATT | GCT | 1 | A | G |
| TCGA-29-1764 | SIPA1L1    | ENST00000555818 | p.T1794T | c.5382A>G | Unverified | TTC | ACA | GAA | 3 | A | G |
| TCGA-29-1691 | SIPA1L2    | ENST00000366630 | p.K1201E | c.3601A>G | Unverified | CAG | AAA | GAT | 1 | A | G |
| TCGA-61-1907 | SKIV2L2    | ENST00000230640 | p.G724G  | c.2172A>G | Unverified | AAA | GGA | GAG | 3 | A | G |
| TCGA-24-1846 | SLC23A3    | ENST00000295738 | p.G78G   | c.234A>G  | Unverified | GGA | GGA | CTC | 3 | A | G |
| TCGA-24-1846 | SLC23A3_EN | ENST00000455516 | p.G78G   | c.234A>G  | Unverified | GGA | GGA | CTC | 3 | A | G |
| TCGA-23-1809 | SLC25A15   | ENST00000426521 | p.E206G  | c.617A>G  | Unverified | gat | gaa | tta | 2 | A | G |
| TCGA-25-1313 | SLC27A4    | ENST00000300456 | p.E640G  | c.1919A>G | Unverified | GGC | GAG | GAG | 2 | A | G |
| TCGA-23-1021 | SLC2A3     | ENST00000075120 | p.P8P    | c.24A>G   | Verified   | ACC | CCA | GCT | 3 | A | G |
| TCGA-24-2288 | SLC39A12   | ENST00000377374 | p.K474E  | c.1420A>G | Unverified | GAC | AAG | AAA | 1 | A | G |
| TCGA-24-2262 | SLC6A2     | ENST00000379906 | p.R587G  | c.1759A>G | Verified   | GAG | AGA | CTG | 1 | A | G |
| TCGA-24-1846 | SLC6A4     | ENST00000261707 | p.K490E  | c.1468A>G | Unverified | GTG | AAG | CTG | 1 | A | G |
| TCGA-24-2267 | SNAI2      | ENST00000020945 | p.N134D  | c.400A>G  | Verified   | tgc | aat | aag | 1 | A | G |

|              |            |                 |          |            |            |     |     |     |   |   |   |
|--------------|------------|-----------------|----------|------------|------------|-----|-----|-----|---|---|---|
| TCGA-13-1499 | SNRPA      | ENST00000243563 | p.T100A  | c.298A>G   | Verified   | GGC | ACC | TTC | 1 | A | G |
| TCGA-13-0890 | SORBS2     | ENST00000284776 | p.E939G  | c.2816A>G  | Verified   | gga | gaa | atc | 2 | A | G |
| TCGA-13-0916 | SOX6       | ENST00000316399 | p.T739A  | c.2215A>G  | Verified   | ATG | ACA | TCT | 1 | A | G |
| TCGA-23-1122 | SP140      | ENST00000373645 | p.G13G   | c.39A>G    | Unverified | AGT | GGA | GAC | 3 | A | G |
| TCGA-24-1103 | SPAG17     | ENST00000336338 | p.T2206T | c.6618A>G  | Verified   | TCT | ACA | ATT | 3 | A | G |
| TCGA-61-2113 | SPAM1      | ENST00000340011 | p.K290E  | c.868A>G   | Verified   | TCC | AAA | ATA | 1 | A | G |
| TCGA-25-1326 | SPATA16    | ENST00000351008 | p.T232A  | c.694A>G   | Verified   | GAG | ACA | AAG | 1 | A | G |
| TCGA-13-1499 | SPATA21    | ENST00000335496 | p.Q401R  | c.1202A>G  | Verified   | GCC | CAG | GTG | 2 | A | G |
| TCGA-61-2113 | SPHK1      | ENST00000323374 | p.T243A  | c.727A>G   | Unverified | CAC | ACG | GCT | 1 | A | G |
| TCGA-24-1847 | SPRED2     | ENST00000356388 | p.D141G  | c.422A>G   | Unverified | GGC | GAT | GAT | 2 | A | G |
| TCGA-29-1777 | SPTLC1     | ENST00000262554 | p.E19G   | c.56A>G    | Unverified | TAC | GAG | GCT | 2 | A | G |
| TCGA-13-1488 | SSH1       | ENST00000326495 | p.E25G   | c.74A>G    | Verified   | TTG | GAG | GCT | 2 | A | G |
| TCGA-61-2109 | ST6GAL2    | ENST00000361686 | p.M445V  | c.1333A>G  | Unverified | ATG | ATG | TCC | 1 | A | G |
| TCGA-09-2051 | STAB1      | ENST00000321725 | p.H430R  | c.1289A>G  | Unverified | CAG | CAC | ATC | 2 | A | G |
| TCGA-30-1718 | STC1       | ENST00000290271 | p.D200G  | c.599A>G   | Unverified | ACA | GAC | CAC | 2 | A | G |
| TCGA-29-1703 | STC2       | ENST00000265087 | p.K104E  | c.310A>G   | Unverified | ATC | AAA | GAC | 1 | A | G |
| TCGA-13-0760 | STIP1      | ENST00000305218 | p.R77R   | c.231A>G   | Verified   | TCA | CGA | AAA | 3 | A | G |
| TCGA-29-1695 | STK31      | ENST00000355870 | p.E929G  | c.2786A>G  | Unverified | TTT | GAG | ATA | 2 | A | G |
| TCGA-61-1914 | STS        | ENST00000217961 | p.Q571R  | c.1712A>G  | Unverified | tgc | cag | tgt | 2 | A | G |
| TCGA-13-0795 | STX3       | ENST00000337979 | p.N173D  | c.517A>G   | Verified   | GGC | AAC | CCG | 1 | A | G |
| TCGA-30-1891 | SULT1A1    | ENST00000314752 | p.T107A  | c.319A>G   | Unverified | AAG | ACA | CAC | 1 | A | G |
| TCGA-04-1361 | SULT1C2    | ENST00000326853 | p.E169G  | c.506A>G   | Verified   | GAA | GAG | TAT | 2 | A | G |
| TCGA-04-1361 | SULT1C2    | ENST00000326853 | p.E169G  | c.506A>G   | Verified   | GAA | GAG | TAT | 2 | A | G |
| TCGA-09-2050 | SUPT3H     | ENST00000371460 | p.N142D  | c.424A>G   | Verified   | GCG | AAC | AAA | 1 | A | G |
| TCGA-13-0904 | SUPT3H     | ENST00000371460 | p.R144R  | c.432A>G   | Verified   | AAA | AGA | CAA | 3 | A | G |
| TCGA-61-1904 | SVEP1      | ENST00000401783 | p.G2688G | c.8064A>G  | Unverified | CCA | GGA | TAT | 3 | A | G |
| TCGA-24-1616 | SYN1       | ENST00000340666 | p.I363V  | c.1087A>G  | Verified   | gag | att | ttt | 1 | A | G |
| TCGA-61-2008 | SYNE1      | ENST00000265368 | p.H6693R | c.20078A>G | Verified   | TCC | CAT | CTG | 2 | A | G |
| TCGA-61-2008 | SYNE1_ENST | ENST00000265368 | p.H6693R | c.20078A>G | Verified   | TCC | CAT | CTG | 2 | A | G |
| TCGA-24-1844 | SYNE2      | ENST00000358025 | p.D2590G | c.7769A>G  | Unverified | ACT | GAC | ATG | 2 | A | G |
| TCGA-61-2094 | TACC3      | ENST00000313288 | p.D412G  | c.1235A>G  | Unverified | GAT | GAC | CCA | 2 | A | G |
| TCGA-13-1408 | TAF12      | ENST00000263974 | p.Q123R  | c.368A>G   | Verified   | CGC | CAG | TGG | 2 | A | G |
| TCGA-24-2035 | TAF4       | ENST00000252996 | p.T1051A | c.3151A>G  | Verified   | TTC | ACG | CGA | 1 | A | G |
| TCGA-24-2267 | TBC1D10A   | ENST00000215790 | p.H101R  | c.302A>G   | Verified   | AAG | CAC | AAA | 2 | A | G |

|              |            |                 |           |            |            |     |     |     |   |   |   |
|--------------|------------|-----------------|-----------|------------|------------|-----|-----|-----|---|---|---|
| TCGA-29-1693 | TBC1D24    | ENST00000567020 | p.K84E    | c.250A>G   | Unverified | GGC | AAG | CAC | 1 | A | G |
| TCGA-13-1488 | TBC1D8     | ENST00000409318 | p.Q72R    | c.215A>G   | Verified   | TCC | CAG | GTT | 2 | A | G |
| TCGA-23-1120 | TBX20_ENST | ENST00000408931 | p.I402V   | c.1204A>G  | Unverified | GCC | ATT | GCC | 1 | A | G |
| TCGA-29-1763 | TCEB3      | ENST00000374536 | p.E83G    | c.248A>G   | Unverified | GCT | GAG | CCT | 2 | A | G |
| TCGA-29-1764 | TECTA      | ENST00000392793 | p.K757E   | c.2269A>G  | Unverified | AAG | AAG | AAG | 1 | A | G |
| TCGA-13-0755 | TGM6       | ENST00000202625 | p.I437V   | c.1309A>G  | Unverified | GAC | ATC | ACT | 1 | A | G |
| TCGA-23-1120 | THADA      | ENST00000405975 | p.T1696T  | c.5088A>G  | Verified   | cct | aca | gag | 3 | A | G |
| TCGA-13-0792 | THAP10     | ENST00000249861 | p.R218R   | c.654A>G   | Verified   | TCT | AGA | ACT | 3 | A | G |
| TCGA-13-0714 | TIMELESS   | ENST00000553532 | p.H730R   | c.2189A>G  | Verified   | CTG | CAC | CGG | 2 | A | G |
| TCGA-13-0760 | TLR3       | ENST00000296795 | p.T262A   | c.784A>G   | Verified   | tcc | acc | acc | 1 | A | G |
| TCGA-13-0791 | TLR6       | ENST00000381950 | p.E371G   | c.1112A>G  | Verified   | TTT | GAA | AAA | 2 | A | G |
| TCGA-30-1857 | TM4SF4     | ENST00000305354 | p.I60V    | c.178A>G   | Unverified | ATG | ATC | TTC | 1 | A | G |
| TCGA-23-1110 | TNS1       | ENST00000171887 | p.Q1513R  | c.4538A>G  | Verified   | CAG | CAG | AAT | 2 | A | G |
| TCGA-23-1022 | TP53       | ENST00000269305 | p.K164E   | c.490A>G   | Verified   | TAC | AAG | CAG | 1 | A | G |
| TCGA-29-1701 | TP53       | ENST00000269305 | p.?       | c.994-2A>G | Unverified | CAG | ATC | CGT | 1 | A | G |
| TCGA-09-0369 | TP53       | ENST00000269305 | p.H193R   | c.578A>G   | Verified   | CAG | CAT | CTT | 2 | A | G |
| TCGA-09-0369 | TP53       | ENST00000269305 | p.H193R   | c.578A>G   | Verified   | CAG | CAT | CTT | 2 | A | G |
| TCGA-13-0762 | TP53       | ENST00000269305 | p.H193R   | c.578A>G   | Verified   | CAG | CAT | CTT | 2 | A | G |
| TCGA-13-0762 | TP53       | ENST00000269305 | p.H193R   | c.578A>G   | Verified   | CAG | CAT | CTT | 2 | A | G |
| TCGA-29-1701 | TP53_ENSTC | ENST00000269305 | p.?       | c.994-2A>G | Unverified | CAG | ATC | CGT | 1 | A | G |
| TCGA-24-1463 | TPRKB      | ENST00000272424 | p.R30R    | c.90A>G    | Verified   | TTG | AGA | AGA | 3 | A | G |
| TCGA-29-2427 | TRIM36     | ENST00000282369 | p.R501R   | c.1503A>G  | Verified   | AGC | AGA | GAA | 3 | A | G |
| TCGA-61-1737 | TRIO       | ENST00000344204 | p.S1642S  | c.4926A>G  | Unverified | gcc | tca | cgg | 3 | A | G |
| TCGA-23-1123 | TROAP      | ENST00000257909 | p.E573G   | c.1718A>G  | Verified   | CAG | GAA | CAG | 2 | A | G |
| TCGA-23-1123 | TROAP      | ENST00000257909 | p.E573G   | c.1718A>G  | Verified   | CAG | GAA | CAG | 2 | A | G |
| TCGA-09-1674 | TRPM1      | ENST00000397795 | p.K590E   | c.1768A>G  | Unverified | AAG | AAG | AAA | 1 | A | G |
| TCGA-13-1510 | TRPM6      | ENST00000360774 | p.K1631E  | c.4891A>G  | Unverified | tcc | aaa | ttt | 1 | A | G |
| TCGA-61-1740 | TRPV4      | ENST00000261740 | p.D425G   | c.1274A>G  | Unverified | CTG | GAC | ACG | 2 | A | G |
| TCGA-04-1638 | TSC2       | ENST00000219476 | p.M260V   | c.778A>G   | Unverified | CTG | ATG | CGG | 1 | A | G |
| TCGA-04-1638 | TSC2_ENSTC | ENST00000219476 | p.M260V   | c.778A>G   | Unverified | CTG | ATG | CGG | 1 | A | G |
| TCGA-24-1423 | TTC35      | ENST00000220853 | p.I141V   | c.421A>G   | Verified   | GCC | ATT | CGG | 1 | A | G |
| TCGA-13-1509 | TTL8       | ENST00000266182 | p.I288V   | c.862A>G   | Verified   | TGC | ATC | TTC | 1 | A | G |
| TCGA-13-0893 | TTN        | NM_003319       | p.K14359E | c.43075A>G | Verified   | aag | aaa | agt | 1 | A | G |
| TCGA-29-1770 | TTN        | NM_003319       | p.P15867P | c.47601A>G | Unverified | gag | cca | atc | 3 | A | G |

|              |                          |           |            |            |     |     |     |   |   |   |
|--------------|--------------------------|-----------|------------|------------|-----|-----|-----|---|---|---|
| TCGA-25-1313 | TTN_ENST00000342175      | p.T5539T  | c.16617A>G | Unverified | ATC | ACA | CCT | 3 | A | G |
| TCGA-29-1770 | TTN_ENST00000342175      | p.P16059P | c.48177A>G | Unverified | GAG | CCA | ATC | 3 | A | G |
| TCGA-61-1733 | TTN_ENST00000342992      | p.S4474G  | c.13420A>G | Unverified | AGC | AGC | ATC | 1 | A | G |
| TCGA-61-1733 | TTN_ENST00000342992      | p.S4474G  | c.13420A>G | Unverified | AGC | AGC | ATC | 1 | A | G |
| TCGA-30-1855 | TTN_ENST00000342992      | p.E5139G  | c.15416A>G | Unverified | CAA | GAA | CCA | 2 | A | G |
| TCGA-29-1770 | TTN_ENST00000342992      | p.P22364P | c.67092A>G | Unverified | GAG | CCA | ATC | 3 | A | G |
| TCGA-13-0893 | TTN_ENST00000356127      | p.K20854E | c.62560A>G | Verified   | AAG | AAA | AGT | 1 | A | G |
| TCGA-25-1313 | TTN_ENST00000356127      | p.T11844T | c.35532A>G | Unverified | ATC | ACA | CCT | 3 | A | G |
| TCGA-29-1770 | TTN_ENST00000356127      | p.P22362P | c.67086A>G | Unverified | GAG | CCA | ATC | 3 | A | G |
| TCGA-29-1770 | TTN_ENST00000359218      | p.P15992P | c.47976A>G | Unverified | GAG | CCA | ATC | 3 | A | G |
| TCGA-09-2050 | TULP4 ENST00000367097    | p.K541E   | c.1621A>G  | Verified   | CCC | AAA | CTC | 1 | A | G |
| TCGA-24-2035 | TUSC3 ENST00000382020    | p.?       | c.799-2A>G | Verified   | GTG | AGC | TAC | 1 | A | G |
| TCGA-30-1856 | TYR ENST00000263321      | p.A493A   | c.1479A>G  | Unverified | CTG | GCA | GGG | 3 | A | G |
| TCGA-23-1124 | UACA ENST00000379983     | p.D1281G  | c.3842A>G  | Verified   | TGT | GAT | AAG | 2 | A | G |
| TCGA-23-1022 | UGGT1 ENST00000259253    | p.N416D   | c.1246A>G  | Verified   | AGG | AAT | GAA | 1 | A | G |
| TCGA-25-1313 | UNC45A ENST00000418476   | p.T660A   | c.1978A>G  | Verified   | CTG | ACC | AGT | 1 | A | G |
| TCGA-30-1855 | UNC5D ENST00000287272    | p.Q635R   | c.1904A>G  | Unverified | ACA | CAG | CAG | 2 | A | G |
| TCGA-30-1855 | UNC5D_ENST00000404895    | p.Q640R   | c.1919A>G  | Unverified | ACA | CAG | CAG | 2 | A | G |
| TCGA-61-1740 | USP2 ENST00000260187     | p.H501R   | c.1502A>G  | Unverified | CTC | CAT | CTG | 2 | A | G |
| TCGA-24-1422 | USP24 XM_371254.3        | p.E944G   | c.2831A>G  | Verified   | gat | gaa | caa | 2 | A | G |
| TCGA-24-1431 | USP34 ENST00000398571    | p.R2950G  | c.8848A>G  | Verified   | TTC | AGA | ATA | 1 | A | G |
| TCGA-24-1474 | USP36 ENST00000312010    | p.T827A   | c.2479A>G  | Unverified | GAG | ACG | CGC | 1 | A | G |
| TCGA-24-1849 | USP36 ENST00000312010    | p.D270G   | c.809A>G   | Unverified | TTG | GAC | GTC | 2 | A | G |
| TCGA-24-1474 | USP36_ENST00000312010    | p.T827A   | c.2479A>G  | Unverified | GAG | ACG | CGC | 1 | A | G |
| TCGA-24-1849 | USP36_ENST00000312010    | p.D270G   | c.809A>G   | Unverified | TTG | GAC | GTC | 2 | A | G |
| TCGA-61-1900 | USP9X OTTHUMT00000056248 | p.M345V   | c.1033A>G  | Unverified | aag | atg | aat | 1 | A | G |
| TCGA-61-1900 | USP9X_ENST00000324545    | p.M352V   | c.1054A>G  | Unverified | AAG | ATG | AAT | 1 | A | G |
| TCGA-24-1844 | UTP20 ENST00000261637    | p.E314G   | c.941A>G   | Unverified | TGT | GAA | AGT | 2 | A | G |
| TCGA-23-1110 | UTRN ENST00000367545     | p.M721V   | c.2161A>G  | Verified   | AAG | ATG | CAA | 1 | A | G |
| TCGA-24-2288 | VCAN ENST00000265077     | p.S1909S  | c.5727A>G  | Verified   | ATT | TCA | GAG | 3 | A | G |
| TCGA-09-2049 | VDAC2 ENST00000332211    | p.D41G    | c.122A>G   | Verified   | CTG | GAT | GTG | 2 | A | G |
| TCGA-04-1542 | VPS13B ENST00000358544   | p.H303R   | c.908A>G   | Verified   | tgt | cat | aat | 2 | A | G |
| TCGA-09-2044 | VPS16 ENST00000380445    | p.D739G   | c.2216A>G  | Verified   | GAA | GAT | TGG | 2 | A | G |
| TCGA-04-1367 | VPS39 ENST00000318006    | p.M125V   | c.373A>G   | Verified   | cgg | atg | tgt | 1 | A | G |

|              |         |                 |          |           |            |     |     |     |   |   |   |
|--------------|---------|-----------------|----------|-----------|------------|-----|-----|-----|---|---|---|
| TCGA-24-2267 | VPS8    | ENST00000437079 | p.R501G  | c.1501A>G | Verified   | TGG | AGA | GAG | 1 | A | G |
| TCGA-24-1464 | WBP11   | ENST00000261167 | p.D263G  | c.788A>G  | Verified   | ATG | GAT | CAA | 2 | A | G |
| TCGA-29-1701 | WDFY3   | ENST00000295888 | p.R501G  | c.1501A>G | Unverified | TTC | AGG | GAG | 1 | A | G |
| TCGA-04-1342 | WDR36   | ENST00000506538 | p.M586V  | c.1756A>G | Verified   | ATC | ATG | TTG | 1 | A | G |
| TCGA-30-1891 | WNK1    | NM_018979       | p.K1966E | c.5896A>G | Unverified | gac | aag | atc | 1 | A | G |
| TCGA-23-1032 | WSB2    | ENST00000315436 | p.P390P  | c.1170A>G | Verified   | CTG | CCA | ATC | 3 | A | G |
| TCGA-13-0893 | XIRP2   | ENST00000295237 | p.E3260G | c.9779A>G | Verified   | CAA | GAG | GAA | 2 | A | G |
| TCGA-24-1417 | XIRP2   | ENST00000295237 | p.P2292P | c.6876A>G | Verified   | CCT | CCA | TCT | 3 | A | G |
| TCGA-20-0990 | ZBTB38  | ENST00000514251 | p.N921D  | c.2761A>G | Verified   | TAC | AAC | TAC | 1 | A | G |
| TCGA-61-1740 | ZBTB7B  | ENST00000292176 | p.D179G  | c.536A>G  | Unverified | GAA | GAC | AGT | 2 | A | G |
| TCGA-13-1507 | ZC3H6   | ENST00000409871 | p.D154G  | c.461A>G  | Verified   | GAT | GAC | AAC | 2 | A | G |
| TCGA-23-1118 | ZC3H6   | ENST00000409871 | p.D696G  | c.2087A>G | Unverified | GAA | GAT | GAT | 2 | A | G |
| TCGA-09-2056 | ZC3H7B  | ENST00000352645 | p.T801A  | c.2401A>G | Unverified | CAG | ACC | TAT | 1 | A | G |
| TCGA-25-2042 | ZCCHC14 | ENST00000268616 | p.D176G  | c.527A>G  | Unverified | CTG | GAC | TCA | 2 | A | G |
| TCGA-23-1032 | ZEB2    | ENST00000303660 | p.D86G   | c.257A>G  | Verified   | gaa | gat | gaa | 2 | A | G |
| TCGA-09-2050 | ZFP112  | ENST00000337401 | p.T828T  | c.2484A>G | Verified   | CAC | ACA | GGA | 3 | A | G |
| TCGA-13-1499 | ZFPM2   | ENST00000407775 | p.E77G   | c.230A>G  | Verified   | GCA | GAA | TCA | 2 | A | G |
| TCGA-13-1512 | ZFYVE27 | ENST00000356257 | p.E240G  | c.719A>G  | Verified   | GAA | GAG | CAT | 2 | A | G |
| TCGA-20-0991 | ZMYND10 | ENST00000231749 | p.H36R   | c.107A>G  | Verified   | CAG | CAT | GAG | 2 | A | G |
| TCGA-25-2400 | ZNF142  | ENST00000396788 | p.D88G   | c.263A>G  | Unverified | TCA | GAC | ACC | 2 | A | G |
| TCGA-04-1362 | ZNF229  | ENST00000291187 | p.G261G  | c.783A>G  | Verified   | CCT | GGA | GAG | 3 | A | G |
| TCGA-24-2288 | ZNF248  | ENST00000395867 | p.E461G  | c.1382A>G | Unverified | GGG | GAG | AAG | 2 | A | G |
| TCGA-04-1649 | ZNF280B | ENST00000360412 | p.T147T  | c.441A>G  | Unverified | ATT | ACA | TTC | 3 | A | G |
| TCGA-61-1915 | ZNF337  | ENST00000376436 | p.E164G  | c.491A>G  | Unverified | ACA | GAA | ATA | 2 | A | G |
| TCGA-04-1347 | ZNF398  | ENST00000475153 | p.A39A   | c.117A>G  | Verified   | ACA | GCA | GCT | 3 | A | G |
| TCGA-13-0760 | ZNF425  | ENST00000378061 | p.H516R  | c.1547A>G | Verified   | CAG | CAC | CTG | 2 | A | G |
| TCGA-29-1776 | ZNF462  | ENST00000277225 | p.H1977R | c.5930A>G | Unverified | GTG | CAC | CCA | 2 | A | G |
| TCGA-13-0760 | ZNF470  | ENST00000330619 | p.D221G  | c.662A>G  | Verified   | CAA | GAC | CGT | 2 | A | G |
| TCGA-09-2051 | ZNF513  | ENST00000323703 | p.G345G  | c.1035A>G | Unverified | GCT | GGA | GGG | 3 | A | G |
| TCGA-04-1638 | ZNF516  | ENST00000217537 | p.E692G  | c.2075A>G | Unverified | GTG | GAG | TTC | 2 | A | G |
| TCGA-13-0913 | ZNF552  | ENST00000391701 | p.E386G  | c.1157A>G | Unverified | TGT | GAA | AAA | 2 | A | G |
| TCGA-13-1509 | ZNF577  | ENST00000301399 | p.E211G  | c.632A>G  | Verified   | GGA | GAG | AAG | 2 | A | G |
| TCGA-13-0923 | ZNF586  | ENST00000396154 | p.G80G   | c.240A>G  | Verified   | CAG | GGA | GGT | 3 | A | G |
| TCGA-30-1857 | ZNF594  | ENST00000399604 | p.S580G  | c.1738A>G | Unverified | GGC | AGC | TCA | 1 | A | G |

|              |            |                 |          |             |            |     |     |     |   |   |   |
|--------------|------------|-----------------|----------|-------------|------------|-----|-----|-----|---|---|---|
| TCGA-13-0791 | ZNF599     | ENST00000329285 | p.E567G  | c.1700A>G   | Verified   | AAT | GAA | TGT | 2 | A | G |
| TCGA-29-1761 | ZNF610     | ENST00000327920 | p.H446R  | c.1337A>G   | Unverified | CGA | CAT | CGG | 2 | A | G |
| TCGA-61-1740 | ZNF626_ENS | ENST00000305570 | p.K92E   | c.274A>G    | Unverified | ATG | AAA | GAT | 1 | A | G |
| TCGA-29-1693 | ZNF630     | ENST00000409324 | p.G455G  | c.1365A>G   | Unverified | aca | gga | gaa | 3 | A | G |
| TCGA-24-2267 | ZNF655     | ENST00000394163 | p.E409G  | c.1226A>G   | Verified   | CAT | GAA | TGT | 2 | A | G |
| TCGA-13-0755 | ZNF70      | ENST00000341976 | p.K287E  | c.859A>G    | Verified   | GGG | AAA | GCC | 1 | A | G |
| TCGA-61-2109 | ZNF708     | ENST00000356929 | p.E57G   | c.170A>G    | Unverified | CTG | GAG | CAA | 2 | A | G |
| TCGA-13-0793 | ZNF8       | ENST00000196548 | p.R572G  | c.1714A>G   | Verified   | ATC | AGA | GAA | 1 | A | G |
| TCGA-29-1691 | ZNF827     | ENST00000379448 | p.Q8R    | c.23A>G     | Unverified | GAG | CAG | CCC | 2 | A | G |
| TCGA-09-1674 | ZNF83      | ENST00000301096 | p.H66R   | c.197A>G    | Unverified | ACC | CAC | ATT | 2 | A | G |
| TCGA-29-1770 | ZNF831     | ENST00000371030 | p.K1267E | c.3799A>G   | Unverified | TGG | AAG | AAA | 1 | A | G |
| TCGA-23-1123 | ZNFX1      | ENST00000371752 | p.R1180G | c.3538A>G   | Verified   | GTC | AGG | GTC | 1 | A | G |
| TCGA-23-1123 | ZNFX1      | ENST00000371752 | p.R1180G | c.3538A>G   | Verified   | GTC | AGG | GTC | 1 | A | G |
| TCGA-13-1498 | ZSCAN10    | ENST00000252463 | p.R143G  | c.427A>G    | Verified   | TGG | AGG | CTT | 1 | A | G |
| TCGA-23-1022 | ZSCAN20    | ENST00000326544 | p.T597A  | c.1789A>G   | Verified   | GAG | ACT | GAT | 1 | A | G |
| TCGA-13-0883 | ZWILCH     | ENST00000307897 | p.R259G  | c.775A>G    | Verified   | CCC | AGA | GGT | 1 | A | G |
| TCGA-13-1488 | ZZZ3       | ENST00000370801 | p.K669E  | c.2005A>G   | Verified   | ATC | AAA | TAC | 1 | A | G |
| TCGA-29-1785 | ABCB10     | ENST00000344517 | p.I584V  | c.1750A>G   | Unverified | TCT | ATT | GCT | 1 | A | G |
| TCGA-29-1785 | ABCB10     | ENST00000344517 | p.I584V  | c.1750A>G   | Unverified | TCT | ATT | GCT | 1 | A | G |
| TCGA-24-1463 | ACACA      | ENST00000360679 | p.L2117L | c.6351A>G   | Verified   | TTC | CTA | ATT | 3 | A | G |
| TCGA-23-1117 | ACAN       | ENST00000439576 | p.V84V   | c.252A>G    | Verified   | GAG | GTA | GTG | 3 | A | G |
| TCGA-23-1117 | ACAN       | ENST00000439576 | p.V84V   | c.252A>G    | Verified   | GAG | GTA | GTG | 3 | A | G |
| TCGA-61-2095 | ACN9       | ENST00000432641 | p.K28R   | c.83A>G     | Unverified | CTC | AAA | TCC | 2 | A | G |
| TCGA-29-1711 | ACSL4      | ENST00000469796 | p.K630K  | c.1890A>G   | Unverified | cag | aaa | ggg | 3 | A | G |
| TCGA-29-1711 | ACSL4      | ENST00000469796 | p.K630K  | c.1890A>G   | Unverified | cag | aaa | ggg | 3 | A | G |
| TCGA-04-1347 | ADAM29     | ENST00000359240 | p.K365E  | c.1093A>G   | Verified   | ACT | AAA | TTT | 1 | A | G |
| TCGA-13-0900 | ADAM30     | ENST00000369400 | p.N462D  | c.1384A>G   | Verified   | gga | aat | gaa | 1 | A | G |
| TCGA-29-1693 | ADAMTS12   | ENST00000504830 | p.?      | c.1480-2A>G | Unverified | gaa | aac | gtc | 1 | A | G |
| TCGA-13-0884 | ADAMTS16   | NM_139056.1     | p.?      | c.764-2A>G  | Verified   | aaa | tac | atg | 2 | A | G |
| TCGA-13-0884 | ADAMTS16_  | ENST00000274181 | p.?      | c.764-2A>G  | Verified   | AAA | TAC | ATG | 2 | A | G |
| TCGA-24-2289 | ADAR       | ENST00000368474 | p.K1039R | c.3116A>G   | Unverified | GAC | AAA | ATC | 2 | A | G |
| TCGA-23-1032 | AFM        | ENST00000226355 | p.R121G  | c.361A>G    | Verified   | CAA | AGA | AGA | 1 | A | G |
| TCGA-13-0884 | AGFG1      | ENST00000310078 | p.K523R  | c.1568A>G   | Verified   | aca | aag | cca | 2 | A | G |
| TCGA-29-1766 | AKR1A1     | ENST00000372070 | p.N322S  | c.965A>G    | Unverified | ttt | aat | gac | 2 | A | G |

|              |            |                 |          |           |            |     |     |     |   |   |   |
|--------------|------------|-----------------|----------|-----------|------------|-----|-----|-----|---|---|---|
| TCGA-24-1422 | ALDH7A1    | NM_001182.2     | p.Y406C  | c.1217A>G | Verified   | ctc | tat | gtc | 2 | A | G |
| TCGA-29-1784 | ANAPC5     | ENST00000261819 | p.E287E  | c.861A>G  | Unverified | GCC | GAA | AGC | 3 | A | G |
| TCGA-25-1318 | ANK2       | ENST00000357077 | p.N453S  | c.1358A>G | Unverified | CAG | AAC | GGA | 2 | A | G |
| TCGA-25-1318 | ANK2       | ENST00000357077 | p.N453S  | c.1358A>G | Unverified | CAG | AAC | GGA | 2 | A | G |
| TCGA-29-1763 | ANKRD12    | ENST00000262126 | p.E721E  | c.2163A>G | Unverified | TTA | GAA | AAA | 3 | A | G |
| TCGA-13-1408 | ANKRD23    | ENST00000318357 | p.S11G   | c.31A>G   | Verified   | GTA | AGT | GGA | 1 | A | G |
| TCGA-24-0975 | ANKRD6     | ENST00000339746 | p.K224R  | c.671A>G  | Unverified | GCC | AAA | ATC | 2 | A | G |
| TCGA-36-1577 | ANO10      | ENST00000292246 | p.K606R  | c.1817A>G | Verified   | TTA | AAG | TTT | 2 | A | G |
| TCGA-29-1691 | APC        | ENST00000457016 | p.I1060V | c.3178A>G | Unverified | GAA | ATA | AAA | 1 | A | G |
| TCGA-13-0791 | APOB       | ENST00000233242 | p.K2195K | c.6585A>G | Verified   | TTG | AAA | ATA | 3 | A | G |
| TCGA-24-1435 | ARFGEF1    | ENST00000262215 | p.Q591Q  | c.1773A>G | Verified   | gct | caa | gga | 3 | A | G |
| TCGA-13-0714 | ARHGAP1    | ENST00000311956 | p.Y188C  | c.563A>G  | Unverified | TTC | TAT | GTG | 2 | A | G |
| TCGA-25-2400 | ARHGAP29   | ENST00000260526 | p.M792V  | c.2374A>G | Verified   | AAT | ATG | TGT | 1 | A | G |
| TCGA-20-1685 | ARHGEF12   | ENST00000397843 | p.E1111E | c.3333A>G | Unverified | TAT | GAA | CTG | 3 | A | G |
| TCGA-24-0979 | ARHGEF2    | ENST00000313695 | p.N681S  | c.2042A>G | Verified   | ttc | aat | ggc | 2 | A | G |
| TCGA-24-1464 | ARID4B     | ENST00000366603 | p.N1102S | c.3305A>G | Verified   | agt | aat | cag | 2 | A | G |
| TCGA-24-1464 | ARID4B_ENS | ENST00000264183 | p.N1102S | c.3305A>G | Verified   | AGT | AAT | CAG | 2 | A | G |
| TCGA-13-1509 | ARL8A      | ENST00000272217 | p.L114L  | c.342A>G  | Verified   | aac | cta | ctg | 3 | A | G |
| TCGA-23-1111 | ASH1L      | ENST00000392403 | p.Q2371Q | c.7113A>G | Unverified | CGT | CAA | AAA | 3 | A | G |
| TCGA-29-1702 | ASXL1      | ENST00000375687 | p.E185E  | c.555A>G  | Unverified | GTG | GAA | TCT | 3 | A | G |
| TCGA-13-0903 | ATAD2B_EN  | ENST00000238789 | p.R355G  | c.1063A>G | Verified   | GCA | AGA | GCA | 1 | A | G |
| TCGA-29-1762 | ATG2A      | ENST00000377264 | p.E695E  | c.2085A>G | Unverified | CTG | GAA | CTC | 3 | A | G |
| TCGA-13-1501 | ATM        | ENST00000278616 | p.Y2954C | c.8861A>G | Verified   | CTA | TAT | GAT | 2 | A | G |
| TCGA-13-1501 | ATM        | ENST00000278616 | p.Y2954C | c.8861A>G | Verified   | CTA | TAT | GAT | 2 | A | G |
| TCGA-29-1695 | ATP2B1     | ENST00000261173 | p.I1194V | c.3580A>G | Unverified | GGA | ATT | CAC | 1 | A | G |
| TCGA-24-2262 | ATP2B2     | ENST00000383800 | p.N13D   | c.37A>G   | Verified   | AAA | AAC | CAA | 1 | A | G |
| TCGA-29-1783 | ATRNL1     | ENST00000355044 | p.E622E  | c.1866A>G | Unverified | GAA | GAA | CTT | 3 | A | G |
| TCGA-29-1784 | AZI2       | ENST00000479665 | p.N232D  | c.694A>G  | Unverified | TCT | AAT | TTA | 1 | A | G |
| TCGA-61-1915 | B4GALT5    | ENST00000371711 | p.N287S  | c.860A>G  | Unverified | ATC | AAT | GGC | 2 | A | G |
| TCGA-29-1698 | BAZ1A      | ENST00000382422 | p.Q1440Q | c.4320A>G | Unverified | gaa | caa | ctt | 3 | A | G |
| TCGA-13-1497 | BBS2       | ENST00000245157 | p.N671S  | c.2012A>G | Verified   | GGA | AAC | CTC | 2 | A | G |
| TCGA-24-1563 | BCAS3      | ENST00000390652 | p.Y223C  | c.668A>G  | Verified   | TGC | TAT | CCA | 2 | A | G |
| TCGA-04-1356 | BEX4       | XM_043653.9     | p.E360E  | c.1080A>G | Unverified | gaa | gaa | tcc | 3 | A | G |
| TCGA-29-1761 | BFAR       | ENST00000261658 | p.E31E   | c.93A>G   | Unverified | AGT | GAA | TTT | 3 | A | G |



|              |             |                 |          |           |            |     |     |     |   |   |   |
|--------------|-------------|-----------------|----------|-----------|------------|-----|-----|-----|---|---|---|
| TCGA-04-1347 | BLOC1S2     | ENST00000370372 | p.K30E   | c.88A>G   | Verified   | GCA | AAG | GAG | 1 | A | G |
| TCGA-61-1906 | BMP2        | ENST00000378827 | p.Q252Q  | c.756A>G  | Unverified | cac | caa | gat | 3 | A | G |
| TCGA-61-1906 | BMP2        | ENST00000378827 | p.Q252Q  | c.756A>G  | Unverified | cac | caa | gat | 3 | A | G |
| TCGA-23-1110 | BOD1L       | ENST0000040738  | p.K1611E | c.4831A>G | Verified   | ACT | AAG | GAA | 1 | A | G |
| TCGA-13-0761 | BRCA1       | ENST00000357654 | p.K135R  | c.404A>G  | Unverified | gcc | aaa | aga | 2 | A | G |
| TCGA-13-0761 | BRCA1       | ENST00000357654 | p.K135R  | c.404A>G  | Unverified | gcc | aaa | aga | 2 | A | G |
| TCGA-24-1103 | BRCA2       | ENST00000380152 | p.K1638E | c.4912A>G | Verified   | GTT | AAA | GTA | 1 | A | G |
| TCGA-61-2095 | BRF1        | ENST00000546474 | p.E466E  | c.1398A>G | Unverified | TCG | GAA | GCC | 3 | A | G |
| TCGA-23-1029 | BRPF3       | ENST00000357641 | p.K98R   | c.293A>G  | Unverified | GGC | AAA | AAG | 2 | A | G |
| TCGA-29-1783 | BTBD1       | ENST00000261721 | p.M208V  | c.622A>G  | Unverified | ACA | ATG | GAT | 1 | A | G |
| TCGA-29-2427 | BUB1        | ENST00000302759 | p.N534S  | c.1601A>G | Verified   | gga | aac | aaa | 2 | A | G |
| TCGA-13-0904 | BUD31       | ENST00000222969 | p.K3E    | c.7A>G    | Verified   | CCT | AAA | GTC | 1 | A | G |
| TCGA-61-1899 | C10orf18    | ENST00000328090 | p.E2117E | c.6351A>G | Unverified | GCT | GAA | TTC | 3 | A | G |
| TCGA-09-1674 | C10orf68    | ENST00000302316 | p.K448K  | c.1344A>G | Unverified | GAT | AAA | GAA | 3 | A | G |
| TCGA-61-1895 | C10orf71_EI | ENST00000323868 | p.K138R  | c.413A>G  | Unverified | AAT | AAG | CCT | 2 | A | G |
| TCGA-61-1895 | C10orf71_EI | ENST00000374144 | p.K138R  | c.413A>G  | Unverified | AAT | AAG | CCT | 2 | A | G |
| TCGA-23-1032 | C14orf135   | ENST00000404681 | p.N152S  | c.455A>G  | Verified   | AGC | AAT | TCC | 2 | A | G |
| TCGA-24-1422 | C1orf9      | ENST00000263688 | p.I1130M | c.3390A>G | Verified   | CCC | ATA | GCC | 3 | A | G |
| TCGA-23-1111 | C1RL        | ENST00000266542 | p.K72R   | c.215A>G  | Unverified | ATC | AAG | GCT | 2 | A | G |
| TCGA-24-1845 | C2          | ENST00000299367 | p.Y347C  | c.1040A>G | Unverified | GTC | TAT | CTC | 2 | A | G |
| TCGA-09-2050 | C20orf12    | ENST00000262547 | p.K210R  | c.629A>G  | Verified   | CTC | AAG | TGT | 2 | A | G |
| TCGA-09-1665 | C20orf54    | ENST00000217254 | p.N311S  | c.932A>G  | Verified   | GTC | AAC | GCG | 2 | A | G |
| TCGA-09-2049 | C2orf16     | ENST00000408964 | p.Q1206Q | c.3618A>G | Unverified | ACT | CAA | GCT | 3 | A | G |
| TCGA-09-2049 | C2orf16_ENI | ENST00000408964 | p.Q1206Q | c.3618A>G | Unverified | ACT | CAA | GCT | 3 | A | G |
| TCGA-24-1470 | C2orf78     | ENST00000342345 | p.V566V  | c.1698A>G | Verified   | AAG | GTA | GAA | 3 | A | G |
| TCGA-29-1761 | C3P1        | ENST00000333905 | p.V156V  | c.468A>G  | Unverified | ATG | GTA | CCC | 3 | A | G |
| TCGA-24-2288 | C7orf45     | ENST00000297819 | p.E158E  | c.474A>G  | Unverified | TCA | GAA | GCC | 3 | A | G |
| TCGA-13-0883 | C7orf64     | ENST00000265732 | p.T328A  | c.982A>G  | Verified   | AAT | ACA | ACG | 1 | A | G |
| TCGA-23-1114 | C9orf174    | ENST00000375202 | p.R1578G | c.4732A>G | Unverified | GCA | AGG | ATG | 1 | A | G |
| TCGA-20-1686 | CACNA2D1    | ENST00000356860 | p.N1030S | c.3089A>G | Unverified | CCA | AAT | CCT | 2 | A | G |
| TCGA-09-1674 | CALM2       | ENST00000272298 | p.K95E   | c.283A>G  | Unverified | GAT | AAG | GAT | 1 | A | G |
| TCGA-09-2051 | CALML5      | ENST00000380332 | p.N25S   | c.74A>G   | Unverified | GGA | AAC | GGC | 2 | A | G |
| TCGA-24-1464 | CAMK4       | ENST00000512453 | p.K146E  | c.436A>G  | Verified   | gtt | aaa | caa | 1 | A | G |
| TCGA-24-1604 | CCAR1       | ENST00000265872 | p.K156E  | c.466A>G  | Verified   | ACA | AAA | CTA | 1 | A | G |

|              |            |                 |          |           |            |     |     |     |   |   |   |
|--------------|------------|-----------------|----------|-----------|------------|-----|-----|-----|---|---|---|
| TCGA-61-2109 | CCDC39     | ENST00000273654 | p.K212E  | c.634A>G  | Unverified | CAA | AAA | TTG | 1 | A | G |
| TCGA-04-1652 | CCDC51     | ENST00000395694 | p.N93S   | c.278A>G  | Unverified | CTC | AAC | GAG | 2 | A | G |
| TCGA-04-1652 | CCDC51     | ENST00000395694 | p.N93S   | c.278A>G  | Unverified | CTC | AAC | GAG | 2 | A | G |
| TCGA-23-1031 | CCR10      | ENST00000332438 | p.E18E   | c.54A>G   | Unverified | GAT | GAA | GAG | 3 | A | G |
| TCGA-23-1031 | CD163      | ENST00000359156 | p.K640E  | c.1918A>G | Verified   | GGA | AAA | GGA | 1 | A | G |
| TCGA-25-1313 | CDC42BPG_  | ENST00000342711 | p.Y697C  | c.2090A>G | Unverified | GGC | TAC | CTG | 2 | A | G |
| TCGA-61-1904 | CDC42EP1   | ENST00000249014 | p.T235A  | c.703A>G  | Unverified | CCT | ACT | GCA | 1 | A | G |
| TCGA-61-1900 | CDC5L      | ENST00000371477 | p.Q175Q  | c.525A>G  | Unverified | aaa | caa | ttg | 3 | A | G |
| TCGA-04-1337 | CDH1       | ENST00000261769 | p.M316V  | c.946A>G  | Verified   | AAT | ATG | TTC | 1 | A | G |
| TCGA-04-1336 | CDH17      | ENST0000027335  | p.K486E  | c.1456A>G | Verified   | TCT | AAA | ATT | 1 | A | G |
| TCGA-20-0990 | CDK10      | ENST00000353379 | p.N157S  | c.470A>G  | Verified   | AGG | AAC | TTC | 2 | A | G |
| TCGA-24-1846 | CDK13      | ENST00000181839 | p.I875V  | c.2623A>G | Unverified | GTA | ATT | ACT | 1 | A | G |
| TCGA-13-1498 | CEACAM7    | ENST00000006724 | p.Y140C  | c.419A>G  | Verified   | TTC | TAC | GTA | 2 | A | G |
| TCGA-24-1104 | CECR2      | ENST00000400585 | p.K387R  | c.1160A>G | Verified   | AAA | AAG | ACT | 2 | A | G |
| TCGA-61-2102 | CELA2A     | ENST00000359621 | p.Y246C  | c.737A>G  | Verified   | TAC | TAC | CAC | 2 | A | G |
| TCGA-13-1512 | CEP120     | ENST00000306467 | p.E438E  | c.1314A>G | Verified   | TCA | GAA | GTA | 3 | A | G |
| TCGA-24-2262 | CEP135     | ENST00000257287 | p.K749E  | c.2245A>G | Verified   | GAA | AAG | ATT | 1 | A | G |
| TCGA-29-1785 | CEP63      | ENST00000337090 | p.M638V  | c.1912A>G | Unverified | ACT | ATG | TCT | 1 | A | G |
| TCGA-29-1785 | CEP63      | ENST00000337090 | p.M638V  | c.1912A>G | Unverified | ACT | ATG | TCT | 1 | A | G |
| TCGA-04-1367 | CES3       | ENST00000303334 | p.K326R  | c.977A>G  | Verified   | CCC | AAG | GAA | 2 | A | G |
| TCGA-20-1686 | CHD7       | ENST00000423902 | p.K2587K | c.7761A>G | Unverified | CCT | AAA | AAT | 3 | A | G |
| TCGA-20-1686 | CHD7_ENSTI | ENST00000423902 | p.K2587K | c.7761A>G | Unverified | CCT | AAA | AAT | 3 | A | G |
| TCGA-13-1499 | CKAP2      | ENST00000258607 | p.N580S  | c.1739A>G | Verified   | CCC | AAT | ACA | 2 | A | G |
| TCGA-04-1649 | CLCA4      | ENST00000370563 | p.N811S  | c.2432A>G | Unverified | GTA | AAT | ACT | 2 | A | G |
| TCGA-13-0906 | CLEC16A    | ENST00000409790 | p.V190V  | c.570A>G  | Verified   | GCT | GTA | AGA | 3 | A | G |
| TCGA-24-1422 | CLIC1      | ENST00000375780 | p.E4E    | c.12A>G   | Verified   | GAA | GAA | CAA | 3 | A | G |
| TCGA-13-0923 | CLNK       | ENST00000226951 | p.K45R   | c.134A>G  | Verified   | AAC | AAG | CCT | 2 | A | G |
| TCGA-23-1032 | CLTC       | ENST00000269122 | p.Y1289C | c.3866A>G | Verified   | AAC | TAC | TAT | 2 | A | G |
| TCGA-25-2400 | CMYA5      | ENST00000238522 | p.K3055K | c.9165A>G | Verified   | GAA | AAA | TAT | 3 | A | G |
| TCGA-13-0904 | CNBD1      | ENST00000518476 | p.E429E  | c.1287A>G | Unverified | ATT | GAA | GAT | 3 | A | G |
| TCGA-04-1362 | CNNM3      | ENST00000305510 | p.Y456C  | c.1367A>G | Verified   | GAC | TAC | CGA | 2 | A | G |
| TCGA-29-1763 | COBL       | ENST00000265136 | p.E106E  | c.318A>G  | Unverified | CTT | GAA | ATT | 3 | A | G |
| TCGA-20-1686 | COL19A1    | ENST00000322773 | p.I245M  | c.735A>G  | Unverified | GAA | ATA | TCA | 3 | A | G |
| TCGA-24-2024 | COL3A1     | ENST00000304636 | p.K1407R | c.4220A>G | Verified   | AGC | AAA | TTC | 2 | A | G |

|              |            |                 |          |           |            |     |     |     |   |   |   |
|--------------|------------|-----------------|----------|-----------|------------|-----|-----|-----|---|---|---|
| TCGA-09-1665 | COL4A6     | ENST00000334504 | p.Q1367Q | c.4101A>G | Verified   | GGA | CAA | ACA | 3 | A | G |
| TCGA-04-1649 | COL5A2     | ENST00000374866 | p.N1357S | c.4070A>G | Unverified | GAC | AAT | AAA | 2 | A | G |
| TCGA-23-1031 | COPS7A     | ENST00000543155 | p.Y156C  | c.467A>G  | Verified   | gac | tac | agc | 2 | A | G |
| TCGA-24-1849 | COX18      | ENST00000295890 | p.T209A  | c.625A>G  | Unverified | GCT | ACT | GGT | 1 | A | G |
| TCGA-29-1698 | CP         | ENST00000264613 | p.Y260C  | c.779A>G  | Unverified | ATG | TAT | TCT | 2 | A | G |
| TCGA-13-0905 | CPAMD8     | ENST00000291440 | p.Y213C  | c.638A>G  | Verified   | GCC | TAC | ATC | 2 | A | G |
| TCGA-23-1116 | CPAMD8     | ENST00000291440 | p.N1104S | c.3311A>G | Verified   | TCC | AAT | GAG | 2 | A | G |
| TCGA-29-1783 | CPT2       | ENST00000371486 | p.N585S  | c.1754A>G | Unverified | CAC | AAT | GTC | 2 | A | G |
| TCGA-13-1505 | CR1        | ENST00000400960 | p.I1799V | c.5395A>G | Verified   | GAA | ATA | TCT | 1 | A | G |
| TCGA-23-1118 | CRBN       | ENST00000231948 | p.T119A  | c.355A>G  | Verified   | AGA | ACC | TTT | 1 | A | G |
| TCGA-24-2280 | CS         | ENST00000351328 | p.N400S  | c.1199A>G | Unverified | ccc | aat | gta | 2 | A | G |
| TCGA-24-1843 | CSMD3      | ENST00000297405 | p.I3255V | c.9763A>G | Unverified | agt | att | agc | 1 | A | G |
| TCGA-24-1843 | CSMD3_ENS  | ENST00000343508 | p.I3215V | c.9643A>G | Unverified | AGT | ATT | AGC | 1 | A | G |
| TCGA-61-1915 | CTNNA3     | NM_013266.1     | p.T437A  | c.1309A>G | Unverified | tca | aca | aat | 1 | A | G |
| TCGA-61-1915 | CTNNA3_EN  | ENST00000433211 | p.T437A  | c.1309A>G | Unverified | TCA | ACA | AAT | 1 | A | G |
| TCGA-24-1604 | CTR9       | ENST00000361367 | p.Y185C  | c.554A>G  | Verified   | GCT | TAC | TAT | 2 | A | G |
| TCGA-24-2267 | CUL2       | ENST00000374751 | p.Y100C  | c.299A>G  | Verified   | gac | tat | atg | 2 | A | G |
| TCGA-09-2049 | CXorf23_EN | ENST00000379687 | p.K222E  | c.664A>G  | Verified   | CCT | AAA | GAC | 1 | A | G |
| TCGA-24-2280 | CYP20A1    | ENST00000356079 | p.Q264Q  | c.792A>G  | Unverified | GAC | CAA | CAG | 3 | A | G |
| TCGA-13-1488 | DCAF16     | ENST00000382247 | p.T198A  | c.592A>G  | Verified   | ACT | ACT | TAT | 1 | A | G |
| TCGA-29-1784 | DCBLD2     | ENST00000326840 | p.Y265C  | c.794A>G  | Unverified | TAT | TAT | GAA | 2 | A | G |
| TCGA-23-1021 | DCK        | ENST00000286648 | p.T72A   | c.214A>G  | Verified   | CTT | ACA | ATG | 1 | A | G |
| TCGA-30-1856 | DDI2       | ENST00000480945 | p.N57S   | c.170A>G  | Unverified | GAC | AAC | CAC | 2 | A | G |
| TCGA-13-0886 | DDX6       | NM_004397.3     | p.K356E  | c.1066A>G | Verified   | gct | aaa | atg | 1 | A | G |
| TCGA-61-1998 | DEPDC5     | ENST00000400248 | p.K1079R | c.3236A>G | Unverified | CGA | AAG | GTA | 2 | A | G |
| TCGA-24-2035 | DGKB       | ENST00000403951 | p.L462L  | c.1386A>G | Verified   | TAT | CTA | TTA | 3 | A | G |
| TCGA-24-1845 | DHX9       | ENST00000367549 | p.N981D  | c.2941A>G | Unverified | ACT | AAC | ACT | 1 | A | G |
| TCGA-13-0885 | DHX9       | ENST00000367549 | p.L684L  | c.2052A>G | Verified   | ATT | CTA | CCC | 3 | A | G |
| TCGA-29-1762 | DMD_ENSTC  | ENST00000357033 | p.K760K  | c.2280A>G | Unverified | TTA | AAA | GAA | 3 | A | G |
| TCGA-29-1762 | DMD_ENSTC  | ENST00000378677 | p.K756K  | c.2268A>G | Unverified | TTA | AAA | GAA | 3 | A | G |
| TCGA-24-1464 | DMD_ENSTC  | ENST00000378677 | p.E607E  | c.1821A>G | Verified   | CTA | GAA | AAG | 3 | A | G |
| TCGA-29-1762 | DMD_ENSTC  | ENST00000378677 | p.K756K  | c.2268A>G | Unverified | TTA | AAA | GAA | 3 | A | G |
| TCGA-04-1652 | DNAH11     | ENST00000328843 | p.K2761K | c.8283A>G | Unverified | AAA | AAA | GAT | 3 | A | G |
| TCGA-04-1652 | DNAH11     | ENST00000328843 | p.K2761K | c.8283A>G | Unverified | AAA | AAA | GAT | 3 | A | G |

|              |            |                 |          |            |            |     |     |     |   |   |   |
|--------------|------------|-----------------|----------|------------|------------|-----|-----|-----|---|---|---|
| TCGA-04-1347 | DNALI1     | ENST00000296218 | p.Y186C  | c.557A>G   | Verified   | GCC | TAC | CAG | 2 | A | G |
| TCGA-20-1683 | DNMBP      | ENST00000324109 | p.Y1284C | c.3851A>G  | Unverified | AGG | TAT | CCC | 2 | A | G |
| TCGA-61-1913 | DOCK2      | ENST00000256935 | p.K268R  | c.803A>G   | Unverified | CCT | AAG | GAG | 2 | A | G |
| TCGA-30-1855 | DOCK4_ENS  | ENST00000437633 | p.N328D  | c.982A>G   | Unverified | TGT | AAC | ACA | 1 | A | G |
| TCGA-24-2024 | DPP4       | ENST00000360534 | p.R310G  | c.928A>G   | Verified   | GAA | AGA | ATT | 1 | A | G |
| TCGA-61-1738 | DPYD       | ENST00000370192 | p.V162V  | c.486A>G   | Unverified | GAG | GTA | TTC | 3 | A | G |
| TCGA-61-1738 | DPYD       | ENST00000370192 | p.V162V  | c.486A>G   | Unverified | GAG | GTA | TTC | 3 | A | G |
| TCGA-04-1336 | DPYS       | ENST00000351513 | p.K153E  | c.457A>G   | Verified   | gat | aaa | ggt | 1 | A | G |
| TCGA-61-1910 | DRP2       | ENST00000402866 | p.K609R  | c.1826A>G  | Unverified | ACC | AAG | TGC | 2 | A | G |
| TCGA-04-1649 | DSCAM      | ENST00000400454 | p.N1341S | c.4022A>G  | Unverified | AGC | AAC | GGA | 2 | A | G |
| TCGA-29-1777 | DST        | ENST00000370765 | p.S4G    | c.10A>G    | Unverified | AGT | AGT | AGT | 1 | A | G |
| TCGA-29-1777 | DST_ENST0C | ENST00000244364 | p.S4G    | c.10A>G    | Unverified | AGT | AGT | AGT | 1 | A | G |
| TCGA-29-1777 | DST_ENST0C | ENST00000370765 | p.S4G    | c.10A>G    | Unverified | AGT | AGT | AGT | 1 | A | G |
| TCGA-13-0760 | DST_ENST0C | ENST00000370769 | p.K5067E | c.15199A>G | Verified   | TTT | AAA | GAA | 1 | A | G |
| TCGA-13-0760 | DST_ENST0C | ENST00000370769 | p.K3597K | c.10791A>G | Verified   | AGC | AAA | CAA | 3 | A | G |
| TCGA-13-0893 | DUSP19     | ENST00000354221 | p.N90S   | c.269A>G   | Verified   | aag | aat | aag | 2 | A | G |
| TCGA-24-1844 | DUSP6      | ENST00000279488 | p.K324K  | c.972A>G   | Unverified | GTC | AAA | ATG | 3 | A | G |
| TCGA-04-1338 | DYRK1A     | ENST00000398960 | p.I283V  | c.847A>G   | Verified   | agt | atc | att | 1 | A | G |
| TCGA-13-0923 | DYSF       | ENST00000258104 | p.I1582V | c.4744A>G  | Verified   | CGT | ATC | TAC | 1 | A | G |
| TCGA-24-0975 | EDC4       | ENST00000358933 | p.N484D  | c.1450A>G  | Verified   | GAA | AAT | GAC | 1 | A | G |
| TCGA-04-1367 | EEA1       | ENST00000322349 | p.K983K  | c.2949A>G  | Verified   | CTT | AAA | ATT | 3 | A | G |
| TCGA-24-2289 | EGFR       | ENST00000275493 | p.K716R  | c.2147A>G  | Unverified | ATC | AAA | GTG | 2 | A | G |
| TCGA-13-0760 | EIF3K      | ENST00000248342 | p.I18V   | c.52A>G    | Verified   | GGT | ATC | GAC | 1 | A | G |
| TCGA-09-2044 | EIF4A1     | ENST00000293831 | p.N280S  | c.839A>G   | Verified   | ATC | AAC | ACC | 2 | A | G |
| TCGA-61-1915 | ENSG000000 | ENST00000341450 | p.M20V   | c.58A>G    | Unverified | CCA | ATG | TAT | 1 | A | G |
| TCGA-24-1469 | ENSG000000 | ENST00000429810 | p.S197G  | c.589A>G   | Verified   | GCA | AGT | GCT | 1 | A | G |
| TCGA-30-1857 | ENSG000000 | ENST00000454856 | p.K326K  | c.978A>G   | Unverified | GAA | AAA | CAG | 3 | A | G |
| TCGA-13-0884 | EPRS       | ENST00000366923 | p.K865K  | c.2595A>G  | Verified   | TAT | AAA | GAA | 3 | A | G |
| TCGA-24-2288 | EPS8       | ENST00000281172 | p.S353G  | c.1057A>G  | Unverified | CCT | AGT | GCT | 1 | A | G |
| TCGA-13-1512 | ERVFRD-1   | ENST00000472091 | p.K27E   | c.79A>G    | Verified   | GAA | AAA | GCT | 1 | A | G |
| TCGA-24-2280 | EXOC6      | ENST00000260762 | p.T127A  | c.379A>G   | Unverified | ACA | ACT | GTA | 1 | A | G |
| TCGA-25-2392 | EZH1       | ENST00000428826 | p.K322R  | c.965A>G   | Verified   | cgc | aag | aat | 2 | A | G |
| TCGA-04-1655 | F5         | ENST00000367797 | p.Y1546C | c.4637A>G  | Unverified | CCC | TAT | GAT | 2 | A | G |
| TCGA-13-0760 | F5         | ENST00000367797 | p.Y2149C | c.6446A>G  | Verified   | ATG | TAT | GTA | 2 | A | G |

|              |             |                     |          |           |            |     |     |     |   |   |   |
|--------------|-------------|---------------------|----------|-----------|------------|-----|-----|-----|---|---|---|
| TCGA-61-2095 | FAM178B     | ENST00000393526     | p.T93A   | c.277A>G  | Unverified | GCT | ACC | CAG | 1 | A | G |
| TCGA-24-0975 | FAM190B     | ENST00000224756     | p.N291S  | c.872A>G  | Verified   | TTT | AAT | AGG | 2 | A | G |
| TCGA-61-1737 | FAM21B      | ENST00000358474     | p.L694L  | c.2082A>G | Unverified | GAT | TTA | TTT | 3 | A | G |
| TCGA-61-1737 | FAM21B_EN   | ENST00000358474     | p.L694L  | c.2082A>G | Unverified | GAT | TTA | TTT | 3 | A | G |
| TCGA-13-0714 | FAM83B      | ENST00000306858     | p.K489R  | c.1466A>G | Verified   | ACA | AAG | TCA | 2 | A | G |
| TCGA-24-1422 | FAM83B      | ENST00000306858     | p.K823K  | c.2469A>G | Verified   | ACA | AAA | GTT | 3 | A | G |
| TCGA-29-1761 | FANCA       | ENST00000389301     | p.K143R  | c.428A>G  | Unverified | AGA | AAG | AAG | 2 | A | G |
| TCGA-61-2009 | FAT3_ENSTC  | ENST00000298047_v61 | p.T764A  | c.2290A>G | Verified   | TTT | ACA | ATA | 1 | A | G |
| TCGA-23-1114 | FAT3_ENSTC  | ENST00000298047_v61 | p.E2556E | c.7668A>G | Unverified | ACA | GAA | AGG | 3 | A | G |
| TCGA-23-1114 | FAT3_ENSTC  | ENST00000409404     | p.E2556E | c.7668A>G | Unverified | ACA | GAA | AGG | 3 | A | G |
| TCGA-61-1733 | FBN1        | ENST00000316623     | p.K2840R | c.8519A>G | Unverified | AAG | AAA | GAA | 2 | A | G |
| TCGA-61-1733 | FBN1        | ENST00000316623     | p.K2840R | c.8519A>G | Unverified | AAG | AAA | GAA | 2 | A | G |
| TCGA-13-0903 | FCRL3       | ENST00000368184     | p.E716E  | c.2148A>G | Verified   | GAA | GAA | GAT | 3 | A | G |
| TCGA-13-1510 | FGB         | ENST00000302068     | p.Q180Q  | c.540A>G  | Unverified | CAC | CAA | TTA | 3 | A | G |
| TCGA-23-1124 | FLJ42177    | ENST00000355283     | p.E245E  | c.735A>G  | Verified   | ATT | GAA | AAG | 3 | A | G |
| TCGA-61-1725 | FOLR3       | ENST00000456237     | p.Y271C  | c.812A>G  | Unverified | TTC | TAT | GCT | 2 | A | G |
| TCGA-30-1718 | FOXM1       | ENST00000342628     | p.Q712Q  | c.2136A>G | Unverified | CCG | CAA | AGG | 3 | A | G |
| TCGA-24-0975 | FREM2       | ENST00000280481     | p.N358S  | c.1073A>G | Unverified | TTC | AAC | CTT | 2 | A | G |
| TCGA-24-1469 | FRK         | ENST00000368626     | p.I121V  | c.361A>G  | Verified   | gca | atc | gga | 1 | A | G |
| TCGA-61-2012 | FRMPD1      | ENST00000377765     | p.S359G  | c.1075A>G | Verified   | ATT | AGC | TTC | 1 | A | G |
| TCGA-13-1498 | FRZB        | ENST00000295113     | p.Y259C  | c.776A>G  | Verified   | GGC | TAT | GAA | 2 | A | G |
| TCGA-29-1761 | FSIP2       | ENST00000343098     | p.K465E  | c.1393A>G | Unverified | AGT | AAA | CCA | 1 | A | G |
| TCGA-29-1761 | FSIP2_ENSTC | ENST00000343098     | p.K465E  | c.1393A>G | Unverified | AGT | AAA | CCA | 1 | A | G |
| TCGA-29-1775 | GAB2        | ENST00000361507     | p.K650R  | c.1949A>G | Unverified | gag | aag | acc | 2 | A | G |
| TCGA-24-1470 | GABBR1      | ENST00000377034     | p.N431S  | c.1292A>G | Verified   | CTG | AAT | CCT | 2 | A | G |
| TCGA-24-1616 | GABRG2      | ENST00000356592     | p.Y452C  | c.1355A>G | Verified   | TCC | TAT | GCT | 2 | A | G |
| TCGA-13-0916 | GALNT6      | ENST00000356317     | p.K70R   | c.209A>G  | Verified   | CCC | AAG | CTC | 2 | A | G |
| TCGA-29-1701 | GANAB       | ENST00000356638     | p.K231R  | c.692A>G  | Unverified | TTC | AAA | ACT | 2 | A | G |
| TCGA-61-1740 | GBP5        | ENST00000370459     | p.Q327Q  | c.981A>G  | Unverified | GTG | CAA | AAG | 3 | A | G |
| TCGA-04-1649 | GGA1        | ENST00000343632     | p.N284S  | c.851A>G  | Unverified | GCC | AAT | GAC | 2 | A | G |
| TCGA-23-1022 | GJA8        | ENST00000369235     | p.K390R  | c.1169A>G | Verified   | GAG | AAG | GTG | 2 | A | G |
| TCGA-29-1784 | GLDN        | ENST00000335449     | p.T547A  | c.1639A>G | Unverified | TCA | ACT | ACC | 1 | A | G |
| TCGA-13-0923 | GLUD2       | ENST00000328078     | p.L293L  | c.879A>G  | Unverified | att | tta | gga | 3 | A | G |
| TCGA-29-1777 | GLUL        | ENST00000339526     | p.K333R  | c.998A>G  | Unverified | GAG | AAG | AAG | 2 | A | G |

|              |            |                     |          |            |            |     |     |     |   |   |   |
|--------------|------------|---------------------|----------|------------|------------|-----|-----|-----|---|---|---|
| TCGA-10-0930 | GNB2       | ENST00000303210     | p.M101V  | c.301A>G   | Verified   | gta | atg | acc | 1 | A | G |
| TCGA-10-0930 | GNB2       | ENST00000303210     | p.M101V  | c.301A>G   | Verified   | gta | atg | acc | 1 | A | G |
| TCGA-24-0979 | GOLGA3     | ENST00000204726     | p.T934A  | c.2800A>G  | Verified   | GAA | ACA | CAC | 1 | A | G |
| TCGA-20-1683 | GOSR2      | ENST00000225567     | p.K57R   | c.170A>G   | Unverified | AGC | AAG | GAG | 2 | A | G |
| TCGA-20-1683 | GOSR2_ENS  | ENST00000415811     | p.K57R   | c.170A>G   | Unverified | AGC | AAG | GAG | 2 | A | G |
| TCGA-20-1683 | GOSR2_ENS  | ENST00000439730     | p.K57R   | c.170A>G   | Unverified | AGC | AAG | GAG | 2 | A | G |
| TCGA-29-1695 | GPI        | ENST00000356487     | p.Q15Q   | c.45A>G    | Unverified | cag | caa | tgg | 3 | A | G |
| TCGA-23-1031 | GPR12      | ENST00000381436     | p.L82L   | c.246A>G   | Unverified | CTG | CTA | ATA | 3 | A | G |
| TCGA-25-2398 | GPR141     | ENST00000334425     | p.Y265C  | c.794A>G   | Verified   | TTT | TAT | AAC | 2 | A | G |
| TCGA-23-1124 | GPR149     | ENST00000389740     | p.I196V  | c.586A>G   | Verified   | TCT | ATC | GTG | 1 | A | G |
| TCGA-13-0916 | GPR21      | ENST00000373642     | p.Y190C  | c.569A>G   | Verified   | TCC | TAC | TTC | 2 | A | G |
| TCGA-13-0807 | GPR98      | ENST00000405460     | p.S2368G | c.7102A>G  | Verified   | AGA | AGT | TCC | 1 | A | G |
| TCGA-24-2035 | GPR98      | ENST00000405460     | p.E5087E | c.15261A>G | Unverified | ATA | GAA | GAA | 3 | A | G |
| TCGA-13-1497 | GRPR       | ENST00000380289     | p.K235K  | c.705A>G   | Verified   | GCT | AAA | AAT | 3 | A | G |
| TCGA-24-1435 | GTF2IRD2B  | ENST00000312575     | p.K790E  | c.2368A>G  | Verified   | GCA | AAA | CTG | 1 | A | G |
| TCGA-23-1114 | GUCY1A2    | ENST00000526355     | p.Q170Q  | c.510A>G   | Unverified | ATT | CAA | AAA | 3 | A | G |
| TCGA-23-1122 | GUCY2C     | ENST00000261170     | p.T618A  | c.1852A>G  | Verified   | TCT | ACC | AAC | 1 | A | G |
| TCGA-24-2267 | GUCY2C     | ENST00000261170     | p.S23G   | c.67A>G    | Verified   | TTT | AGT | TCC | 1 | A | G |
| TCGA-04-1331 | HACE1      | ENST00000262903     | p.M114V  | c.340A>G   | Verified   | TGT | ATG | AGT | 1 | A | G |
| TCGA-29-1775 | HDC        | ENST00000267845     | p.N588S  | c.1763A>G  | Unverified | TGC | AAC | AGT | 2 | A | G |
| TCGA-25-1326 | HDX        | ENST00000297977     | p.N242D  | c.724A>G   | Verified   | cat | aac | tta | 1 | A | G |
| TCGA-04-1651 | HEATR1     | ENST00000366582     | p.E1926E | c.5778A>G  | Unverified | ACA | GAA | GAT | 3 | A | G |
| TCGA-04-1651 | HEATR1     | ENST00000366582     | p.E1926E | c.5778A>G  | Unverified | ACA | GAA | GAT | 3 | A | G |
| TCGA-29-1763 | HEATR5A    | ENST00000389961     | p.E1518E | c.4554A>G  | Unverified | GAT | GAA | GGA | 3 | A | G |
| TCGA-29-1763 | HEATR5A_EI | ENST00000389961_v65 | p.E1518E | c.4554A>G  | Unverified | GAT | GAA | GGA | 3 | A | G |
| TCGA-23-2078 | HERC4      | ENST00000395198     | p.N906S  | c.2717A>G  | Verified   | TTC | AAT | AAA | 2 | A | G |
| TCGA-09-1674 | HEXA       | ENST00000268097     | p.N295S  | c.884A>G   | Unverified | CTC | AAT | AAT | 2 | A | G |
| TCGA-24-1417 | HFM1       | ENST00000370425     | p.L1011L | c.3033A>G  | Unverified | ATA | TTA | AGA | 3 | A | G |
| TCGA-29-1696 | HLTF       | ENST00000310053     | p.N24S   | c.71A>G    | Unverified | gga | aat | ttt | 2 | A | G |
| TCGA-29-1696 | HLTF       | ENST00000310053     | p.N24S   | c.71A>G    | Unverified | gga | aat | ttt | 2 | A | G |
| TCGA-61-1740 | HPS4       | ENST00000336873     | p.E499E  | c.1497A>G  | Unverified | TGT | GAA | AGC | 3 | A | G |
| TCGA-61-1740 | HPS4_ENSTC | ENST00000398141     | p.E512E  | c.1536A>G  | Unverified | TGT | GAA | AGC | 3 | A | G |
| TCGA-29-2427 | HSD17B4    | ENST00000256216     | p.I399V  | c.1195A>G  | Verified   | TCA | ATC | AAC | 1 | A | G |
| TCGA-61-1895 | IGFN1      | ENST00000335211     | p.K66R   | c.197A>G   | Unverified | TCC | AAA | GGT | 2 | A | G |

|              |            |                 |          |            |            |     |     |     |   |   |   |
|--------------|------------|-----------------|----------|------------|------------|-----|-----|-----|---|---|---|
| TCGA-61-1895 | IGFN1_ENST | ENST00000335211 | p.K2906R | c.8717A>G  | Unverified | TCC | AAG | GAT | 2 | A | G |
| TCGA-09-2044 | IL31RA     | ENST00000447346 | p.N663S  | c.1988A>G  | Verified   | AAC | AAT | TTA | 2 | A | G |
| TCGA-24-2289 | INSRR      | ENST00000368195 | p.E451E  | c.1353A>G  | Unverified | TTG | GAA | CAC | 3 | A | G |
| TCGA-24-2289 | INSRR_ENST | ENST00000368195 | p.E451E  | c.1353A>G  | Unverified | TTG | GAA | CAC | 3 | A | G |
| TCGA-13-0904 | INTS6      | ENST00000311234 | p.T686A  | c.2056A>G  | Verified   | cct | aca | act | 1 | A | G |
| TCGA-25-2392 | IPP        | ENST00000396478 | p.M471V  | c.1411A>G  | Verified   | CCA | ATG | GGA | 1 | A | G |
| TCGA-61-1737 | IQSEC2     | XM_291345.2     | p.K1005R | c.3014A>G  | Unverified | acc | aaa | att | 2 | A | G |
| TCGA-61-1737 | IQSEC2_ENS | ENST00000396435 | p.K1008R | c.3023A>G  | Unverified | ACC | AAA | ATT | 2 | A | G |
| TCGA-13-0920 | IRF8       | ENST00000268638 | p.K148R  | c.443A>G   | Verified   | ATC | AAG | GAG | 2 | A | G |
| TCGA-61-1907 | ITGA6_ENST | ENST00000409080 | p.K1067R | c.3200A>G  | Unverified | ATC | AAA | GAT | 2 | A | G |
| TCGA-24-0979 | ITPR3      | ENST00000374316 | p.N1487S | c.4460A>G  | Verified   | GAG | AAC | AGC | 2 | A | G |
| TCGA-24-1423 | JMJD1C     | ENST00000402544 | p.N2195S | c.6584A>G  | Verified   | GTG | AAC | AAA | 2 | A | G |
| TCGA-13-1488 | KATNAL2    | ENST00000245121 | p.E131E  | c.393A>G   | Verified   | AGT | GAA | CTT | 3 | A | G |
| TCGA-61-1914 | KCNK10     | ENST00000340700 | p.K297R  | c.890A>G   | Unverified | TAT | AAG | CCC | 2 | A | G |
| TCGA-61-1914 | KCNK10_EN: | ENST00000312350 | p.K302R  | c.905A>G   | Unverified | TAT | AAG | CCC | 2 | A | G |
| TCGA-61-1914 | KCNK10_EN: | ENST00000319231 | p.K302R  | c.905A>G   | Unverified | TAT | AAG | CCC | 2 | A | G |
| TCGA-24-0975 | KDM3B      | ENST00000314358 | p.N848S  | c.2543A>G  | Verified   | CCC | AAT | GGG | 2 | A | G |
| TCGA-13-1498 | KIAA1109   | ENST00000264501 | p.Y4272C | c.12815A>G | Verified   | TGG | TAT | AGA | 2 | A | G |
| TCGA-24-1422 | KIAA1109   | ENST00000264501 | p.E4578E | c.13734A>G | Verified   | CAG | GAA | TTT | 3 | A | G |
| TCGA-23-1114 | KIAA1529   | ENST00000375206 | p.R1523G | c.4567A>G  | Unverified | GCA | AGG | ATG | 1 | A | G |
| TCGA-61-1737 | KIDINS220  | ENST00000256707 | p.Y1079C | c.3236A>G  | Unverified | GCG | TAC | CCC | 2 | A | G |
| TCGA-04-1542 | KIF13A     | ENST00000259711 | p.K404K  | c.1212A>G  | Verified   | ATA | AAA | GAA | 3 | A | G |
| TCGA-29-1776 | KIF13A     | ENST00000259711 | p.I995M  | c.2985A>G  | Unverified | TCC | ATA | TTA | 3 | A | G |
| TCGA-29-1776 | KIF13A_ENS | ENST00000259711 | p.I995M  | c.2985A>G  | Unverified | TCC | ATA | TTA | 3 | A | G |
| TCGA-13-0887 | KIF21A     | ENST00000361961 | p.K950K  | c.2850A>G  | Verified   | GAG | AAA | CTT | 3 | A | G |
| TCGA-13-0762 | KIF2A      | NM_004520.1     | p.I609V  | c.1825A>G  | Unverified | tct | att | cgg | 1 | A | G |
| TCGA-13-0762 | KIF2A      | NM_004520.1     | p.I609V  | c.1825A>G  | Unverified | tct | att | cgg | 1 | A | G |
| TCGA-04-1638 | KLB        | ENST00000257408 | p.Q980Q  | c.2940A>G  | Unverified | ACC | CAA | GAA | 3 | A | G |
| TCGA-23-1022 | KLHL6      | ENST00000341319 | p.Y519C  | c.1556A>G  | Verified   | ATC | TAT | GTC | 2 | A | G |
| TCGA-10-0930 | KRIT1      | ENST00000394507 | p.N580D  | c.1738A>G  | Verified   | gaa | aat | cta | 1 | A | G |
| TCGA-10-0930 | KRIT1      | ENST00000394507 | p.N580D  | c.1738A>G  | Verified   | gaa | aat | cta | 1 | A | G |
| TCGA-23-1809 | KRT19      | ENST00000361566 | p.K370R  | c.1109A>G  | Unverified | ATC | AAG | TCG | 2 | A | G |
| TCGA-24-1423 | KRT6B      | ENST00000252252 | p.K68R   | c.203A>G   | Unverified | TCC | AAG | AGG | 2 | A | G |
| TCGA-61-1914 | L1TD1      | ENST00000498273 | p.Y849C  | c.2546A>G  | Unverified | GAT | TAT | GTT | 2 | A | G |

|              |            |                 |          |            |            |     |     |     |   |   |   |
|--------------|------------|-----------------|----------|------------|------------|-----|-----|-----|---|---|---|
| TCGA-25-1318 | LACTB2     | ENST00000522447 | p.Q212Q  | c.636A>G   | Verified   | caa | caa | tac | 3 | A | G |
| TCGA-25-1318 | LACTB2     | ENST00000522447 | p.Q212Q  | c.636A>G   | Verified   | caa | caa | tac | 3 | A | G |
| TCGA-13-1489 | LATS1_ENST | ENST00000253339 | p.K662K  | c.1986A>G  | Verified   | AAA | AAA | CAA | 3 | A | G |
| TCGA-24-1847 | LCE1D      | ENST00000326233 | p.K15R   | c.44A>G    | Unverified | CCC | AAG | TGC | 2 | A | G |
| TCGA-30-1856 | LHX9       | ENST00000367387 | p.K121R  | c.362A>G   | Unverified | TGC | AAG | GAG | 2 | A | G |
| TCGA-30-1856 | LHX9_ENST  | ENST00000367390 | p.K112R  | c.335A>G   | Unverified | TGC | AAG | GAG | 2 | A | G |
| TCGA-13-1496 | LIG3       | NM_002311.2     | p.I623V  | c.1867A>G  | Verified   | tca | atc | ttc | 1 | A | G |
| TCGA-24-2280 | LINGO2     | ENST00000379992 | p.N258S  | c.773A>G   | Unverified | ACC | AAC | ACC | 2 | A | G |
| TCGA-24-2280 | LINGO2_EN  | ENST00000379992 | p.N258S  | c.773A>G   | Unverified | ACC | AAC | ACC | 2 | A | G |
| TCGA-09-2044 | LIPK       | ENST00000404190 | p.I337V  | c.1009A>G  | Verified   | GCA | ATA | TGG | 1 | A | G |
| TCGA-04-1651 | LMAN2      | ENST00000303127 | p.N305S  | c.914A>G   | Unverified | GAC | AAC | GTG | 2 | A | G |
| TCGA-04-1651 | LMAN2      | ENST00000303127 | p.N305S  | c.914A>G   | Unverified | GAC | AAC | GTG | 2 | A | G |
| TCGA-61-1998 | LOC652153  | ENST00000316490 | p.Q1749Q | c.5247A>G  | Unverified | AGC | CAA | ACC | 3 | A | G |
| TCGA-23-1029 | LPHN2      | ENST00000359929 | p.T965A  | c.2893A>G  | Unverified | GGA | ACA | GAA | 1 | A | G |
| TCGA-23-1029 | LPHN2_ENS  | ENST00000370725 | p.T978A  | c.2932A>G  | Unverified | GGA | ACA | GAA | 1 | A | G |
| TCGA-23-1032 | LPXN       | ENST00000395074 | p.M226V  | c.676A>G   | Verified   | GCA | ATG | AAC | 1 | A | G |
| TCGA-13-0887 | LRBA       | ENST00000357115 | p.I2458V | c.7372A>G  | Verified   | TCA | ATA | ACT | 1 | A | G |
| TCGA-29-1768 | LRCH1      | ENST00000389798 | p.T401A  | c.1201A>G  | Unverified | TTT | ACT | GAT | 1 | A | G |
| TCGA-29-1768 | LRCH1_ENS  | ENST00000311191 | p.T401A  | c.1201A>G  | Unverified | TTT | ACT | GAT | 1 | A | G |
| TCGA-24-1845 | LRP12      | ENST00000276654 | p.Y275C  | c.824A>G   | Unverified | AAT | TAT | CCA | 2 | A | G |
| TCGA-13-1510 | LRP4       | ENST00000378623 | p.N1589S | c.4766A>G  | Unverified | CGG | AAC | AAG | 2 | A | G |
| TCGA-61-1910 | LRRC28     | ENST00000301981 | p.T324A  | c.970A>G   | Unverified | TTT | ACC | ATC | 1 | A | G |
| TCGA-04-1367 | LRRC31     | ENST00000316428 | p.N124S  | c.371A>G   | Verified   | TGG | AAT | GGT | 2 | A | G |
| TCGA-24-1844 | LRRC66     | ENST00000343457 | p.S603G  | c.1807A>G  | Unverified | GAT | AGT | AAG | 1 | A | G |
| TCGA-30-1855 | LRRIQ1_ENS | ENST00000393217 | p.S1677G | c.5029A>G  | Unverified | GTA | AGC | AGA | 1 | A | G |
| TCGA-24-1463 | LYAR       | ENST00000343470 | p.N7S    | c.20A>G    | Unverified | TGC | AAT | GCA | 2 | A | G |
| TCGA-61-1740 | LYST       | ENST00000389793 | p.Y1976C | c.5927A>G  | Unverified | GAA | TAC | AAA | 2 | A | G |
| TCGA-61-2109 | MACF1      | ENST00000360115 | p.N3607S | c.10820A>G | Unverified | CTT | AAC | AAA | 2 | A | G |
| TCGA-25-2391 | MACF1      | ENST00000360115 | p.L2655L | c.7965A>G  | Unverified | CTT | CTA | CCC | 3 | A | G |
| TCGA-61-2109 | MACF1_ENS  | ENST00000361689 | p.N3105S | c.9314A>G  | Unverified | CTT | AAC | AAA | 2 | A | G |
| TCGA-25-2391 | MACF1_ENS  | ENST00000361689 | p.L2153L | c.6459A>G  | Unverified | CTT | CTA | CCC | 3 | A | G |
| TCGA-61-1910 | MALT1_ENS  | ENST00000348428 | p.K226R  | c.677A>G   | Unverified | TCC | AAG | TTG | 2 | A | G |
| TCGA-25-2042 | MAN2B2     | ENST00000285599 | p.Y362C  | c.1085A>G  | Verified   | TTC | TAC | ACG | 2 | A | G |
| TCGA-61-2109 | MAP3K7     | ENST00000369332 | p.Y93C   | c.278A>G   | Unverified | ctt | tat | gga | 2 | A | G |



|              |           |                 |           |            |            |     |     |     |   |   |   |
|--------------|-----------|-----------------|-----------|------------|------------|-----|-----|-----|---|---|---|
| TCGA-13-0714 | MAPK9_ENS | ENST00000452135 | p.N90S    | c.269A>G   | Unverified | TTA | AAT | GTG | 2 | A | G |
| TCGA-13-0923 | MARS      | ENST00000262027 | p.Y314C   | c.941A>G   | Verified   | gag | tat | ggt | 2 | A | G |
| TCGA-13-1510 | MBD4      | ENST00000249910 | p.K340R   | c.1019A>G  | Verified   | gcc | aaa | gac | 2 | A | G |
| TCGA-29-1777 | MCF2_ENS  | ENST00000519895 | p.K526K   | c.1578A>G  | Unverified | TGT | AAA | CTT | 3 | A | G |
| TCGA-13-0714 | MCM3AP    | ENST00000397708 | p.N1781S  | c.5342A>G  | Unverified | aaa | aac | gat | 2 | A | G |
| TCGA-24-1423 | MDH2      | ENST00000315758 | p.K307R   | c.920A>G   | Verified   | ggc | aaa | gtc | 2 | A | G |
| TCGA-29-1781 | MDN1      | ENST00000369393 | p.T996A   | c.2986A>G  | Unverified | TTA | ACA | CAG | 1 | A | G |
| TCGA-13-0793 | MECOM     | ENST00000392736 | p.M711V   | c.2131A>G  | Verified   | TCT | ATG | TTC | 1 | A | G |
| TCGA-29-1693 | MECOM     | ENST00000392736 | p.N804S   | c.2411A>G  | Unverified | ACC | AAT | TTA | 2 | A | G |
| TCGA-20-1687 | MEP1A     | ENST00000230588 | p.Y113C   | c.338A>G   | Unverified | CCC | TAT | GAA | 2 | A | G |
| TCGA-61-1733 | METTL14   | ENST00000388822 | p.L170L   | c.510A>G   | Unverified | TAC | TTA | CAA | 3 | A | G |
| TCGA-61-1733 | METTL14   | ENST00000388822 | p.L170L   | c.510A>G   | Unverified | TAC | TTA | CAA | 3 | A | G |
| TCGA-61-1910 | MFGE8     | ENST00000268150 | p.Y53C    | c.158A>G   | Unverified | TCG | TAC | ACC | 2 | A | G |
| TCGA-25-1313 | MGAM      | ENST00000389322 | p.K281R   | c.842A>G   | Verified   | TGG | AAG | ACC | 2 | A | G |
| TCGA-25-1313 | MGAM_ENS  | ENST00000549489 | p.K281R   | c.842A>G   | Verified   | TGG | AAG | ACC | 2 | A | G |
| TCGA-13-1481 | MGAT4C    | ENST00000332156 | p.K305E   | c.913A>G   | Verified   | TTT | AAA | CCA | 1 | A | G |
| TCGA-04-1542 | MLIP      | ENST00000274897 | p.N114S   | c.341A>G   | Verified   | GCA | AAC | AAA | 2 | A | G |
| TCGA-13-1501 | MLL4      | ENST00000222270 | p.N700S   | c.2099A>G  | Unverified | ACC | AAC | CAC | 2 | A | G |
| TCGA-13-1501 | MLL4      | ENST00000222270 | p.N700S   | c.2099A>G  | Unverified | ACC | AAC | CAC | 2 | A | G |
| TCGA-13-0904 | MMRN1     | ENST00000394980 | p.V1144V  | c.3432A>G  | Verified   | GGA | GTA | TAT | 3 | A | G |
| TCGA-09-2044 | MOCS1     | ENST00000373186 | p.K362R   | c.1085A>G  | Verified   | AGG | AAG | AAG | 2 | A | G |
| TCGA-13-0890 | MPHOSPH1C | ENST00000244230 | p.K669R   | c.2006A>G  | Verified   | AAG | AAG | AAA | 2 | A | G |
| TCGA-24-0979 | MSH5      | NM_025259.3     | p.Q569Q   | c.1707A>G  | Verified   | cca | caa | gtc | 3 | A | G |
| TCGA-10-0930 | MTO1      | ENST00000370300 | p.K245R   | c.734A>G   | Verified   | GCC | AAA | GAG | 2 | A | G |
| TCGA-10-0930 | MTO1      | ENST00000370300 | p.K245R   | c.734A>G   | Verified   | GCC | AAA | GAG | 2 | A | G |
| TCGA-61-2012 | MTTP      | ENST00000265517 | p.K454R   | c.1361A>G  | Verified   | GCT | AAG | AAG | 2 | A | G |
| TCGA-29-1691 | MUC16     | ENST00000397910 | p.K6942R  | c.20825A>G | Unverified | ATT | AAG | AGA | 2 | A | G |
| TCGA-29-1770 | MUC16     | ENST00000397910 | p.Q4179Q  | c.12537A>G | Unverified | TCA | CAA | GGG | 3 | A | G |
| TCGA-13-1512 | MUC16_ENS | ENST00000397910 | p.T14068A | c.42202A>G | Verified   | ACA | ACA | GCC | 1 | A | G |
| TCGA-29-1691 | MUC16_ENS | ENST00000397910 | p.K6942R  | c.20825A>G | Unverified | ATT | AAG | AGA | 2 | A | G |
| TCGA-29-1770 | MUC16_ENS | ENST00000397910 | p.Q4179Q  | c.12537A>G | Unverified | TCA | CAA | GGG | 3 | A | G |
| TCGA-13-1499 | MUC7      | ENST00000304887 | p.K122K   | c.366A>G   | Verified   | ACC | AAA | ATT | 3 | A | G |
| TCGA-24-2288 | MYBPC1    | ENST00000361466 | p.K1127K  | c.3381A>G  | Unverified | TGC | AAA | GCA | 3 | A | G |
| TCGA-24-1469 | MYH1      | ENST00000226207 | p.S1096G  | c.3286A>G  | Verified   | CAA | AGC | AAG | 1 | A | G |

|              |            |                 |          |           |            |     |     |     |   |   |   |
|--------------|------------|-----------------|----------|-----------|------------|-----|-----|-----|---|---|---|
| TCGA-13-0807 | MYH1       | ENST00000226207 | p.K386R  | c.1157A>G | Verified   | GAC | AAG | GCA | 2 | A | G |
| TCGA-04-1343 | MYH1       | ENST00000226207 | p.E1494E | c.4482A>G | Verified   | GAG | GAA | TCT | 3 | A | G |
| TCGA-13-0792 | MYH11      | ENST00000338282 | p.K414E  | c.1240A>G | Verified   | ACA | AAA | GAA | 1 | A | G |
| TCGA-24-2035 | MYLK4      | ENST00000274643 | p.K374R  | c.1121A>G | Unverified | CAG | AAG | AAG | 2 | A | G |
| TCGA-13-0791 | MYO18B     | ENST00000335473 | p.K2401R | c.7202A>G | Unverified | GGA | AAG | GAG | 2 | A | G |
| TCGA-13-0904 | MYST3      | ENST00000265713 | p.N456S  | c.1367A>G | Verified   | GAC | AAT | CAG | 2 | A | G |
| TCGA-13-1512 | NASP       | ENST00000341288 | p.K645R  | c.1934A>G | Verified   | CTA | AAG | GAA | 2 | A | G |
| TCGA-24-2267 | NDUFB2     | ENST00000247866 | p.I99V   | c.295A>G  | Verified   | GGT | ATC | CCT | 1 | A | G |
| TCGA-24-2289 | NEFL       | ENST00000380781 | p.Y43C   | c.128A>G  | Verified   | AGC | TAC | TCG | 2 | A | G |
| TCGA-24-2262 | NEK6       | NM_014397       | p.Y259C  | c.776A>G  | Verified   | gac | tac | ccc | 2 | A | G |
| TCGA-04-1331 | NF1        | ENST00000358273 | p.K1444E | c.4330A>G | Verified   | TCA | AAG | ATA | 1 | A | G |
| TCGA-25-2392 | NFATC2IP   | ENST00000320805 | p.I269V  | c.805A>G  | Verified   | AAA | ATC | CGT | 1 | A | G |
| TCGA-10-0930 | NFKB1      | ENST00000226574 | p.L70L   | c.210A>G  | Verified   | GGA | CTA | CCT | 3 | A | G |
| TCGA-10-0930 | NFKB1      | ENST00000226574 | p.L70L   | c.210A>G  | Verified   | GGA | CTA | CCT | 3 | A | G |
| TCGA-13-1507 | NIPBL      | ENST00000282516 | p.T1918A | c.5752A>G | Verified   | cca | act | cca | 1 | A | G |
| TCGA-13-0924 | NIPBL      | ENST00000282516 | p.K1690R | c.5069A>G | Verified   | gaa | aaa | gca | 2 | A | G |
| TCGA-13-0795 | NKAPL      | ENST00000343684 | p.K190R  | c.569A>G  | Verified   | AGA | AAG | AAT | 2 | A | G |
| TCGA-13-0900 | NOTCH2     | ENST00000256646 | p.Y790C  | c.2369A>G | Verified   | ggc | tat | aac | 2 | A | G |
| TCGA-24-1470 | NP_0010739 | ENST00000296794 | p.L542L  | c.1626A>G | Verified   | AAT | CTA | CAG | 3 | A | G |
| TCGA-23-1114 | NPC1L1     | ENST00000289547 | p.N497S  | c.1490A>G | Unverified | AAC | AAC | CGC | 2 | A | G |
| TCGA-24-1850 | NR2C1      | ENST00000333003 | p.Q290Q  | c.870A>G  | Unverified | TCT | CAA | AAT | 3 | A | G |
| TCGA-09-2050 | NRAP       | ENST00000359988 | p.S985G  | c.2953A>G | Verified   | ATT | AGT | TAT | 1 | A | G |
| TCGA-20-1685 | NUDCD2     | ENST00000302764 | p.I71V   | c.211A>G  | Unverified | ACA | ATA | GCT | 1 | A | G |
| TCGA-13-0791 | NUFIP2     | ENST00000225388 | p.N416D  | c.1246A>G | Verified   | TCT | AAT | GGG | 1 | A | G |
| TCGA-29-1781 | NUP214     | ENST00000359428 | p.Q70Q   | c.210A>G  | Unverified | att | caa | aat | 3 | A | G |
| TCGA-09-2051 | NXF1       | ENST00000294172 | p.T76A   | c.226A>G  | Unverified | tat | acc | acc | 1 | A | G |
| TCGA-04-1652 | OR11A1     | ENST00000377149 | p.I308V  | c.922A>G  | Unverified | TGT | ATC | AAA | 1 | A | G |
| TCGA-04-1652 | OR11A1     | ENST00000377149 | p.I308V  | c.922A>G  | Unverified | TGT | ATC | AAA | 1 | A | G |
| TCGA-29-1691 | OR4A15     | ENST00000314706 | p.N165S  | c.494A>G  | Unverified | ATG | AAT | CGT | 2 | A | G |
| TCGA-25-2042 | OR51E2     | ENST00000396950 | p.T239A  | c.715A>G  | Verified   | GGA | ACC | TGT | 1 | A | G |
| TCGA-24-2289 | OR5B3      | ENST00000309403 | p.K4E    | c.10A>G   | Unverified | AAT | AAG | ACA | 1 | A | G |
| TCGA-29-1768 | OR5D14     | ENST00000335605 | p.V42V   | c.126A>G  | Unverified | GTG | GTA | GGA | 3 | A | G |
| TCGA-13-0884 | OR5M3      | ENST00000312240 | p.T158A  | c.472A>G  | Verified   | GCA | ACA | TTA | 1 | A | G |
| TCGA-29-1705 | ORC5       | ENST00000297431 | p.K355K  | c.1065A>G | Unverified | cca | aaa | cca | 3 | A | G |

|              |            |                 |          |           |            |     |     |     |   |   |   |
|--------------|------------|-----------------|----------|-----------|------------|-----|-----|-----|---|---|---|
| TCGA-29-1705 | OSBPL11    | ENST00000296220 | p.K692R  | c.2075A>G | Unverified | GAT | AAG | GCC | 2 | A | G |
| TCGA-29-1693 | PAK3       | ENST00000446737 | p.N7D    | c.19A>G   | Unverified | gat | aat | gaa | 1 | A | G |
| TCGA-29-1693 | PAK3_ENST0 | ENST00000360648 | p.N7D    | c.19A>G   | Unverified | GAT | AAT | GAA | 1 | A | G |
| TCGA-10-0930 | PALM2      | ENST00000374531 | p.M283V  | c.847A>G  | Verified   | TTT | ATG | GGC | 1 | A | G |
| TCGA-10-0930 | PALM2      | ENST00000374531 | p.M283V  | c.847A>G  | Verified   | TTT | ATG | GGC | 1 | A | G |
| TCGA-24-1844 | PAPD4      | ENST00000296783 | p.I266V  | c.796A>G  | Unverified | CCA | ATT | GTG | 1 | A | G |
| TCGA-23-1116 | PAPPA2     | ENST00000367662 | p.Y893C  | c.2678A>G | Verified   | CAG | TAT | GTG | 2 | A | G |
| TCGA-29-1763 | PARD3      | ENST00000374789 | p.L369L  | c.1107A>G | Unverified | CAA | CTA | TCC | 3 | A | G |
| TCGA-29-1769 | PARP14     | ENST00000310276 | p.K129E  | c.385A>G  | Unverified | AAT | AAA | ATG | 1 | A | G |
| TCGA-29-1769 | PARP14_EN  | ENST00000474629 | p.K292E  | c.874A>G  | Unverified | AAT | AAA | ATG | 1 | A | G |
| TCGA-04-1362 | PC         | ENST00000393955 | p.E728E  | c.2184A>G | Verified   | GCC | GAA | GAG | 3 | A | G |
| TCGA-23-1029 | PCDH10     | ENST00000264360 | p.N816S  | c.2447A>G | Unverified | CAC | AAC | CAG | 2 | A | G |
| TCGA-24-1846 | PCDH15_EN  | ENST00000395438 | p.E1465E | c.4395A>G | Unverified | CTG | GAA | TTG | 3 | A | G |
| TCGA-09-2049 | PCDH9      | ENST00000377865 | p.N1014S | c.3041A>G | Verified   | TGT | AAC | TCA | 2 | A | G |
| TCGA-29-1701 | PCDHA13    | ENST00000289272 | p.N87S   | c.260A>G  | Unverified | GTG | AAT | TCT | 2 | A | G |
| TCGA-24-1422 | PCDHA2     | ENST00000378132 | p.E144E  | c.432A>G  | Verified   | CCC | GAA | TCA | 3 | A | G |
| TCGA-13-0903 | PCDHA3     | ENST00000378129 | p.I212M  | c.636A>G  | Verified   | CTA | ATA | ACA | 3 | A | G |
| TCGA-25-1326 | PCDHA9     | ENST00000378122 | p.K138R  | c.413A>G  | Unverified | CAA | AAG | AAT | 2 | A | G |
| TCGA-13-1408 | PDSS2      | ENST00000369037 | p.L168L  | c.504A>G  | Unverified | AAT | TTA | AAT | 3 | A | G |
| TCGA-61-2012 | PDZRN3     | NM_015009.1     | p.K935R  | c.2804A>G | Unverified | acc | aag | agg | 2 | A | G |
| TCGA-25-1318 | PEG3       | ENST00000326441 | p.K290K  | c.870A>G  | Verified   | CTA | AAA | ACT | 3 | A | G |
| TCGA-25-1318 | PEG3       | ENST00000326441 | p.K290K  | c.870A>G  | Verified   | CTA | AAA | ACT | 3 | A | G |
| TCGA-23-1118 | PENK       | ENST00000314922 | p.R216G  | c.646A>G  | Verified   | AGA | AGA | GTA | 1 | A | G |
| TCGA-13-1408 | PER2       | ENST00000254657 | p.K553R  | c.1658A>G | Unverified | AAG | AAA | GCT | 2 | A | G |
| TCGA-24-2290 | PEX5L      | ENST00000467460 | p.T405A  | c.1213A>G | Verified   | TAT | ACT | AAC | 1 | A | G |
| TCGA-24-2290 | PEX5L      | ENST00000467460 | p.T405A  | c.1213A>G | Verified   | TAT | ACT | AAC | 1 | A | G |
| TCGA-13-0903 | PGAP1      | ENST00000354764 | p.K315R  | c.944A>G  | Verified   | TCC | AAG | AAG | 2 | A | G |
| TCGA-24-2289 | PHF8       | ENST00000338154 | p.T578A  | c.1732A>G | Unverified | agt | acg | aaa | 1 | A | G |
| TCGA-23-1029 | PHLDB2     | ENST00000412622 | p.N382S  | c.1145A>G | Unverified | AGG | AAC | TTC | 2 | A | G |
| TCGA-23-1029 | PHLDB2_EN  | ENST00000393923 | p.N409S  | c.1226A>G | Unverified | AGG | AAC | TTC | 2 | A | G |
| TCGA-23-1029 | PHLDB2_EN  | ENST00000431670 | p.N382S  | c.1145A>G | Unverified | AGG | AAC | TTC | 2 | A | G |
| TCGA-30-1714 | PIK3C3     | ENST00000262039 | p.S710G  | c.2128A>G | Unverified | cca | agt | gag | 1 | A | G |
| TCGA-24-2035 | PIK3CA_ENS | ENST00000263967 | p.E176E  | c.528A>G  | Verified   | CCA | GAA | TTG | 3 | A | G |
| TCGA-13-0885 | PIP        | ENST00000291009 | p.K96E   | c.286A>G  | Verified   | CCA | AAA | ACC | 1 | A | G |

|              |            |                 |          |           |            |     |     |     |   |   |   |
|--------------|------------|-----------------|----------|-----------|------------|-----|-----|-----|---|---|---|
| TCGA-24-2267 | PIR        | ENST00000380420 | p.K46E   | c.136A>G  | Verified   | ttt | aaa | gga | 1 | A | G |
| TCGA-13-1481 | PKDREJ     | ENST00000253255 | p.N1385S | c.4154A>G | Verified   | TTC | AAT | AGG | 2 | A | G |
| TCGA-09-1665 | PLCB1      | ENST00000338037 | p.Y460C  | c.1379A>G | Verified   | atg | tat | aaa | 2 | A | G |
| TCGA-25-1326 | PLCB4      | NM_000933.2     | p.K1014K | c.3042A>G | Verified   | gtc | aaa | gag | 3 | A | G |
| TCGA-09-2050 | PLCE1      | ENST00000260766 | p.N912S  | c.2735A>G | Verified   | CTT | AAT | AAC | 2 | A | G |
| TCGA-61-1910 | PLD5       | ENST00000366545 | p.N367S  | c.1100A>G | Unverified | GGG | AAT | GAT | 2 | A | G |
| TCGA-61-1910 | PLD5_ENST0 | ENST00000536534 | p.N459S  | c.1376A>G | Unverified | GGG | AAT | GAT | 2 | A | G |
| TCGA-23-1114 | PMS1       | ENST00000441310 | p.Y750C  | c.2249A>G | Unverified | cca | tat | aga | 2 | A | G |
| TCGA-23-1110 | PNMA5      | ENST00000361887 | p.Q141Q  | c.423A>G  | Verified   | ccc | caa | gtt | 3 | A | G |
| TCGA-61-1913 | PODN       | ENST00000312553 | p.N197S  | c.590A>G  | Unverified | CTC | AAT | TAC | 2 | A | G |
| TCGA-13-0913 | POLA1      | NM_016937.1     | p.K988K  | c.2964A>G | Verified   | acg | aaa | gag | 3 | A | G |
| TCGA-13-0885 | POLD2      | ENST00000406581 | p.Y332C  | c.995A>G  | Verified   | CCC | TAC | CAG | 2 | A | G |
| TCGA-24-1845 | POLD2      | ENST00000406581 | p.N406S  | c.1217A>G | Unverified | GGC | AAC | ACC | 2 | A | G |
| TCGA-24-1845 | POLD2_ENS  | ENST00000406581 | p.N406S  | c.1217A>G | Unverified | GGC | AAC | ACC | 2 | A | G |
| TCGA-61-2102 | POLI       | NM_007195.1     | p.K271E  | c.811A>G  | Verified   | gaa | aaa | gaa | 1 | A | G |
| TCGA-30-1857 | POP1       | ENST00000349693 | p.M214V  | c.640A>G  | Unverified | CAT | ATG | GTC | 1 | A | G |
| TCGA-04-1338 | POPDC3     | ENST00000254765 | p.I77M   | c.231A>G  | Verified   | GAC | ATA | TTT | 3 | A | G |
| TCGA-30-1857 | POTEB      | ENST00000327822 | p.K363K  | c.1089A>G | Unverified | GAA | AAA | CAG | 3 | A | G |
| TCGA-23-1123 | POTED      | ENST00000299443 | p.K151R  | c.452A>G  | Verified   | GGT | AAA | GTC | 2 | A | G |
| TCGA-23-1123 | POTED      | ENST00000299443 | p.K151R  | c.452A>G  | Verified   | GGT | AAA | GTC | 2 | A | G |
| TCGA-23-1111 | PRAMEF12   | ENST00000357726 | p.L355L  | c.1065A>G | Unverified | GAC | TTA | GAG | 3 | A | G |
| TCGA-20-0991 | PRKAA2     | ENST00000371244 | p.T506A  | c.1516A>G | Verified   | ACA | ACT | GCA | 1 | A | G |
| TCGA-20-0991 | PRKAA2_EN  | ENST00000371244 | p.T506A  | c.1516A>G | Verified   | ACA | ACT | GCA | 1 | A | G |
| TCGA-09-2051 | PRKCQ      | ENST00000263125 | p.N663S  | c.1988A>G | Unverified | agc | aat | ttc | 2 | A | G |
| TCGA-13-0795 | PRKDC      | NM_006904       | p.K2717R | c.8150A>G | Verified   | gtg | aaa | ggt | 2 | A | G |
| TCGA-24-1847 | PRPF40A    | ENST00000354363 | p.M290V  | c.868A>G  | Unverified | AAA | ATG | ATT | 1 | A | G |
| TCGA-24-1847 | PRPF40A_EM | ENST00000359961 | p.M421V  | c.1261A>G | Unverified | AAA | ATG | ATT | 1 | A | G |
| TCGA-24-1847 | PRPF40A_EM | ENST00000410080 | p.M394V  | c.1180A>G | Unverified | AAA | ATG | ATT | 1 | A | G |
| TCGA-20-0990 | PRPH2      | ENST00000230381 | p.Y184C  | c.551A>G  | Verified   | CGC | TAC | CTG | 2 | A | G |
| TCGA-13-0760 | PSD2       | ENST00000274710 | p.K530R  | c.1589A>G | Verified   | GGC | AAG | AGG | 2 | A | G |
| TCGA-24-2288 | PTGIS      | ENST00000244043 | p.N302S  | c.905A>G  | Unverified | AAG | AAT | CCT | 2 | A | G |
| TCGA-23-1120 | PTPN12     | ENST00000248594 | p.T755A  | c.2263A>G | Verified   | CCA | ACA | GAA | 1 | A | G |
| TCGA-04-1338 | PXDNL_ENS  | ENST00000356297 | p.Y578C  | c.1733A>G | Verified   | AGA | TAT | GAA | 2 | A | G |
| TCGA-29-1691 | Q8N9Z5_HU  | ENST00000314855 | p.S126G  | c.376A>G  | Unverified | CGA | AGT | GCA | 1 | A | G |

|              |            |                 |          |            |            |     |     |     |   |   |   |
|--------------|------------|-----------------|----------|------------|------------|-----|-----|-----|---|---|---|
| TCGA-30-1857 | Q96RW6_HI  | ENST00000295249 | p.L58L   | c.174A>G   | Unverified | CTG | TTA | GAA | 3 | A | G |
| TCGA-25-2400 | RABGGTB    | ENST00000319942 | p.L329L  | c.987A>G   | Verified   | GAG | CTA | GTG | 3 | A | G |
| TCGA-13-1489 | RALGAPA1_  | ENST00000307138 | p.M2060V | c.6178A>G  | Verified   | CCA | ATG | TCT | 1 | A | G |
| TCGA-13-0795 | RANBP17    | ENST00000523189 | p.E452E  | c.1356A>G  | Verified   | TGT | GAA | TAT | 3 | A | G |
| TCGA-23-1022 | RANBP6     | ENST00000259569 | p.K106R  | c.317A>G   | Verified   | gtt | aag | tta | 2 | A | G |
| TCGA-24-1469 | RBM12      | ENST00000374104 | p.M395V  | c.1183A>G  | Verified   | AAT | ATG | GGA | 1 | A | G |
| TCGA-13-0924 | RBM14      | ENST00000310137 | p.Y114C  | c.341A>G   | Verified   | GAC | TAC | GCG | 2 | A | G |
| TCGA-61-2012 | RBM15      | ENST00000369784 | p.K431R  | c.1292A>G  | Verified   | GCC | AAA | TTA | 2 | A | G |
| TCGA-61-1915 | RBM27      | ENST00000265271 | p.L416L  | c.1248A>G  | Unverified | CCT | TTA | CCC | 3 | A | G |
| TCGA-24-1469 | RBM28      | ENST00000223073 | p.K688R  | c.2063A>G  | Verified   | GGC | AAA | GTG | 2 | A | G |
| TCGA-13-0893 | RC3H1      | ENST00000258349 | p.L106L  | c.318A>G   | Verified   | GAA | TTA | GCA | 3 | A | G |
| TCGA-09-1665 | REL        | ENST00000295025 | p.K135K  | c.405A>G   | Verified   | gaa | aaa | cag | 3 | A | G |
| TCGA-23-1114 | REN        | ENST00000272190 | p.T151A  | c.451A>G   | Unverified | TCA | ACA | GGG | 1 | A | G |
| TCGA-09-1674 | RIF1       | ENST00000444746 | p.K318R  | c.953A>G   | Unverified | ctc | aag | ttg | 2 | A | G |
| TCGA-61-1998 | RIF1       | ENST00000444746 | p.K925K  | c.2775A>G  | Unverified | aat | aaa | cag | 3 | A | G |
| TCGA-61-2095 | RILP       | ENST00000301336 | p.K259K  | c.777A>G   | Unverified | CTC | AAA | GCC | 3 | A | G |
| TCGA-20-1683 | RIN2       | NM_018993.2     | p.Y665C  | c.1994A>G  | Unverified | atg | tat | tcg | 2 | A | G |
| TCGA-20-1683 | RIN2_ENST0 | ENST00000255006 | p.Y714C  | c.2141A>G  | Unverified | ATG | TAT | TCG | 2 | A | G |
| TCGA-29-1691 | RLIM       | ENST00000332687 | p.K9K    | c.27A>G    | Unverified | gac | aaa | gga | 3 | A | G |
| TCGA-13-0791 | RNF145     | ENST00000274542 | p.I196V  | c.586A>G   | Verified   | ACA | ATT | GTT | 1 | A | G |
| TCGA-13-0791 | RNMTL1     | ENST00000304478 | p.K73R   | c.218A>G   | Verified   | GAG | AAA | CAA | 2 | A | G |
| TCGA-09-2049 | ROR1       | ENST00000371079 | p.S864G  | c.2590A>G  | Verified   | ACT | AGC | ACT | 1 | A | G |
| TCGA-23-1022 | RORB       | ENST00000376896 | p.N134S  | c.401A>G   | Verified   | CTG | AAC | AAC | 2 | A | G |
| TCGA-13-0883 | ROS1       | ENST00000368508 | p.N1495D | c.4483A>G  | Verified   | GTT | AAT | GAC | 1 | A | G |
| TCGA-61-1914 | RPS6KA3    | ENST00000379565 | p.V492V  | c.1476A>G  | Unverified | GTA | GTA | ACA | 3 | A | G |
| TCGA-13-0905 | RRAGC      | ENST00000373001 | p.Y165C  | c.494A>G   | Verified   | GCC | TAC | AAA | 2 | A | G |
| TCGA-23-1022 | RRAGD      | ENST00000369415 | p.I226V  | c.676A>G   | Verified   | tca | ata | ttt | 1 | A | G |
| TCGA-04-1343 | RRBP1      | ENST00000360807 | p.E640E  | c.1920A>G  | Verified   | CCA | GAA | CTC | 3 | A | G |
| TCGA-25-1318 | RRM2B      | ENST00000251810 | p.S25G   | c.73A>G    | Verified   | gaa | agt | gaa | 1 | A | G |
| TCGA-25-1318 | RRM2B      | ENST00000251810 | p.S25G   | c.73A>G    | Verified   | gaa | agt | gaa | 1 | A | G |
| TCGA-24-0979 | RSPH1      | ENST00000291536 | p.E300E  | c.900A>G   | Verified   | gaa | gaa | gaa | 3 | A | G |
| TCGA-09-2049 | RXRA       | ENST00000481739 | p.Y397C  | c.1190A>G  | Verified   | gtc | tat | gcg | 2 | A | G |
| TCGA-13-0906 | RYR2       | ENST00000366574 | p.N4399S | c.13196A>G | Verified   | CCA | AAT | GCT | 2 | A | G |
| TCGA-09-2051 | SAMD7      | ENST00000335556 | p.N57S   | c.170A>G   | Unverified | CCA | AAC | ACA | 2 | A | G |

|              |            |                 |          |           |            |     |     |     |   |   |   |
|--------------|------------|-----------------|----------|-----------|------------|-----|-----|-----|---|---|---|
| TCGA-30-1857 | SCAI       | ENST00000373549 | p.N504S  | c.1511A>G | Unverified | AAC | AAT | CCT | 2 | A | G |
| TCGA-13-0714 | SCCPDH     | ENST00000366510 | p.T67A   | c.199A>G  | Verified   | CCA | ACA | CTG | 1 | A | G |
| TCGA-13-0886 | SECEL      | ENST00000349847 | p.K75R   | c.224A>G  | Verified   | AGG | AAA | GTA | 2 | A | G |
| TCGA-04-1337 | SEC24B     | ENST00000399100 | p.Y426C  | c.1277A>G | Verified   | GGC | TAT | GGC | 2 | A | G |
| TCGA-29-1761 | SETX       | ENST00000224140 | p.E1139E | c.3417A>G | Unverified | ATT | GAA | GAA | 3 | A | G |
| TCGA-29-1761 | SG269_HUM  | ENST00000312493 | p.K397R  | c.1190A>G | Unverified | GAT | AAA | GAT | 2 | A | G |
| TCGA-29-1761 | SgK269     | ENST00000312493 | p.K397R  | c.1190A>G | Unverified | GAT | AAA | GAT | 2 | A | G |
| TCGA-24-1849 | SGOL2      | ENST00000357799 | p.E78E   | c.234A>G  | Unverified | ACT | GAA | AAG | 3 | A | G |
| TCGA-29-1695 | SH3RF3     | ENST00000309415 | p.Y247C  | c.740A>G  | Unverified | AGC | TAT | ATC | 2 | A | G |
| TCGA-13-0924 | SIGLEC6    | ENST00000346477 | p.Q355Q  | c.1065A>G | Verified   | GTG | CAA | AAC | 3 | A | G |
| TCGA-61-2094 | SIN3A      | ENST00000394947 | p.Y558C  | c.1673A>G | Unverified | agc | tat | cga | 2 | A | G |
| TCGA-13-0760 | SIPA1L1    | ENST00000555818 | p.Y504C  | c.1511A>G | Verified   | AAC | TAT | TTT | 2 | A | G |
| TCGA-20-1686 | SIPA1L2    | ENST00000366630 | p.N627S  | c.1880A>G | Unverified | AAC | AAT | GAG | 2 | A | G |
| TCGA-24-2288 | SKAP2      | ENST00000345317 | p.K350E  | c.1048A>G | Unverified | CCT | AAA | GCC | 1 | A | G |
| TCGA-30-1856 | SKOR1      | ENST00000389002 | p.N873D  | c.2617A>G | Unverified | TGT | AAC | GAA | 1 | A | G |
| TCGA-30-1856 | SKOR1_ENS  | ENST00000380035 | p.N917D  | c.2749A>G | Unverified | TGT | AAC | GAA | 1 | A | G |
| TCGA-24-2290 | SLC16A7    | ENST00000261187 | p.Y271C  | c.812A>G  | Verified   | CCA | TAT | GCT | 2 | A | G |
| TCGA-24-2290 | SLC16A7    | ENST00000261187 | p.Y271C  | c.812A>G  | Verified   | CCA | TAT | GCT | 2 | A | G |
| TCGA-24-1435 | SLC26A3    | ENST00000340010 | p.I613M  | c.1839A>G | Verified   | CAG | ATA | GAA | 3 | A | G |
| TCGA-24-1844 | SLC31A1    | ENST00000374212 | p.M81V   | c.241A>G  | Unverified | GCA | ATG | TTC | 1 | A | G |
| TCGA-13-1489 | SLC38A1    | ENST00000398637 | p.K306E  | c.916A>G  | Verified   | AAA | AAA | ATG | 1 | A | G |
| TCGA-13-0920 | SLC44A4    | ENST00000229729 | p.Y302C  | c.905A>G  | Verified   | GCC | TAC | CAG | 2 | A | G |
| TCGA-13-0760 | SLC5A3     | ENST00000381151 | p.M200V  | c.598A>G  | Verified   | CTT | ATG | ATT | 1 | A | G |
| TCGA-30-1718 | SLC6A5     | ENST00000525748 | p.N358S  | c.1073A>G | Unverified | GTT | AAT | TTC | 2 | A | G |
| TCGA-23-1110 | SLITRK5    | ENST00000325089 | p.V925V  | c.2775A>G | Verified   | TTT | GTA | GAA | 3 | A | G |
| TCGA-61-1915 | SLX4       | ENST00000294008 | p.E132E  | c.396A>G  | Unverified | AGT | GAA | CCG | 3 | A | G |
| TCGA-24-1431 | SMG5       | ENST00000361813 | p.E718E  | c.2154A>G | Verified   | TGT | GAA | CTG | 3 | A | G |
| TCGA-61-1910 | SMG7       | ENST00000347615 | p.E404E  | c.1212A>G | Unverified | CAT | GAA | GAG | 3 | A | G |
| TCGA-61-1910 | SMG7_ENST  | ENST00000507469 | p.E404E  | c.1212A>G | Unverified | CAT | GAA | GAG | 3 | A | G |
| TCGA-13-0887 | SORL1      | ENST00000260197 | p.N466S  | c.1397A>G | Verified   | ATC | AAT | TGT | 2 | A | G |
| TCGA-23-1021 | SORL1      | ENST00000260197 | p.Y728C  | c.2183A>G | Verified   | GGC | TAC | CGG | 2 | A | G |
| TCGA-25-2393 | SP140_ENST | ENST00000392045 | p.I230V  | c.688A>G  | Verified   | CAA | ATA | GAT | 1 | A | G |
| TCGA-23-1029 | SPG21      | ENST00000204566 | p.N203S  | c.608A>G  | Unverified | TTG | AAT | TGT | 2 | A | G |
| TCGA-61-1899 | SPICE1     | ENST00000295872 | p.I529V  | c.1585A>G | Unverified | CAT | ATT | TTT | 1 | A | G |

|              |            |                     |          |           |            |     |     |     |   |   |   |
|--------------|------------|---------------------|----------|-----------|------------|-----|-----|-----|---|---|---|
| TCGA-61-1899 | SPICE1_ENS | ENST00000295872_v68 | p.I529V  | c.1585A>G | Unverified | CAT | ATT | TTT | 1 | A | G |
| TCGA-29-1776 | SQLE       | ENST00000265896     | p.I561V  | c.1681A>G | Unverified | GTA | ATA | TTT | 1 | A | G |
| TCGA-04-1651 | SREBF1     | ENST00000355815     | p.I373V  | c.1117A>G | Unverified | AAA | ATC | ATT | 1 | A | G |
| TCGA-04-1651 | SREBF1     | ENST00000355815     | p.I373V  | c.1117A>G | Unverified | AAA | ATC | ATT | 1 | A | G |
| TCGA-24-1616 | SRGAP1     | ENST00000355086     | p.Y633C  | c.1898A>G | Verified   | AGG | TAC | CTC | 2 | A | G |
| TCGA-61-2102 | SRRM2      | ENST00000301740     | p.R940G  | c.2818A>G | Verified   | AGT | AGG | GTG | 1 | A | G |
| TCGA-09-1665 | ST6GALNAC  | ENST00000328299     | p.E117E  | c.351A>G  | Verified   | GAA | GAA | GAT | 3 | A | G |
| TCGA-29-1699 | STAT6      | ENST00000300134     | p.N430S  | c.1289A>G | Unverified | gac | aat | gcc | 2 | A | G |
| TCGA-13-0887 | STK31      | ENST00000355870     | p.S586G  | c.1756A>G | Verified   | TAT | AGT | CAA | 1 | A | G |
| TCGA-13-1481 | STON1-GTF2 | ENST00000394754     | p.V871V  | c.2613A>G | Verified   | TCA | GTA | ATA | 3 | A | G |
| TCGA-29-1690 | STRN3      | NM_014574.2         | p.V195V  | c.585A>G  | Unverified | gat | gta | cgg | 3 | A | G |
| TCGA-29-1690 | STRN3_ENS  | ENST00000357479     | p.V195V  | c.585A>G  | Unverified | GAT | GTA | CGG | 3 | A | G |
| TCGA-25-2401 | STXBP3     | ENST00000370008     | p.I108V  | c.322A>G  | Verified   | TAT | ATT | TAC | 1 | A | G |
| TCGA-13-0885 | SULT2A1    | ENST00000222002     | p.T85A   | c.253A>G  | Verified   | TAT | ACA | GCA | 1 | A | G |
| TCGA-13-0762 | SUPT6H     | ENST00000314616     | p.N800S  | c.2399A>G | Verified   | GTC | AAT | GGT | 2 | A | G |
| TCGA-13-0762 | SUPT6H     | ENST00000314616     | p.N800S  | c.2399A>G | Verified   | GTC | AAT | GGT | 2 | A | G |
| TCGA-29-1711 | SYNE2      | ENST00000358025     | p.Q796Q  | c.2388A>G | Unverified | ATA | CAA | AAT | 3 | A | G |
| TCGA-29-1711 | SYNE2      | ENST00000358025     | p.Q796Q  | c.2388A>G | Unverified | ATA | CAA | AAT | 3 | A | G |
| TCGA-24-1474 | TAF3       | ENST00000344293     | p.K706R  | c.2117A>G | Verified   | AAA | AAG | GAG | 2 | A | G |
| TCGA-29-1690 | TAOK1      | ENST00000261716     | p.I540V  | c.1618A>G | Unverified | CAT | ATT | CAG | 1 | A | G |
| TCGA-29-1690 | TAOK1_ENS  | ENST00000261716     | p.I540V  | c.1618A>G | Unverified | CAT | ATT | CAG | 1 | A | G |
| TCGA-04-1649 | TARDBP     | ENST00000240185     | p.T157A  | c.469A>G  | Unverified | GAA | ACA | CAA | 1 | A | G |
| TCGA-24-1422 | TAS2R46    | ENST00000533467     | p.K122R  | c.365A>G  | Verified   | TTA | AAG | AGG | 2 | A | G |
| TCGA-29-1703 | TDRD6      | ENST00000316081     | p.I841M  | c.2523A>G | Unverified | GGG | ATA | CAG | 3 | A | G |
| TCGA-24-1616 | TEDDM1     | ENST00000367565     | p.K237R  | c.710A>G  | Verified   | CCC | AAA | GAA | 2 | A | G |
| TCGA-61-1904 | TEP1       | ENST00000262715     | p.I1721V | c.5161A>G | Unverified | GGA | ATC | TCT | 1 | A | G |
| TCGA-04-1530 | TFRC       | ENST00000360110     | p.Y563C  | c.1688A>G | Verified   | GAT | TAT | CCT | 2 | A | G |
| TCGA-29-1702 | TH1L       | ENST00000344018     | p.I328V  | c.982A>G  | Unverified | ctt | atc | cgc | 1 | A | G |
| TCGA-13-0887 | THAP2      | ENST00000308086     | p.N4S    | c.11A>G   | Verified   | ACC | AAT | TGC | 2 | A | G |
| TCGA-29-1784 | THRA       | ENST00000394121     | p.L324L  | c.972A>G  | Unverified | ctg | cta | atg | 3 | A | G |
| TCGA-29-1784 | THRA_ENS   | ENST00000450525     | p.L324L  | c.972A>G  | Unverified | CTG | CTA | ATG | 3 | A | G |
| TCGA-29-1763 | THUMP2     | ENST00000260619     | p.Y229C  | c.686A>G  | Unverified | ATT | TAC | TCT | 2 | A | G |
| TCGA-24-1844 | TLK1       | NM_012290           | p.T235A  | c.703A>G  | Unverified | agt | aca | caa | 1 | A | G |
| TCGA-24-1844 | TLK1_ENS   | ENST00000431350     | p.T283A  | c.847A>G  | Unverified | AGT | ACA | CAA | 1 | A | G |

|              |            |                 |          |           |            |     |     |     |   |   |   |
|--------------|------------|-----------------|----------|-----------|------------|-----|-----|-----|---|---|---|
| TCGA-04-1638 | TLN2       | ENST00000306829 | p.K2334E | c.7000A>G | Unverified | CCA | AAA | CAA | 1 | A | G |
| TCGA-04-1342 | TLR4       | ENST00000355622 | p.N282S  | c.845A>G  | Verified   | TGC | AAT | TTG | 2 | A | G |
| TCGA-20-0991 | TMC1       | ENST00000297784 | p.N620S  | c.1859A>G | Verified   | TGC | AAT | GTT | 2 | A | G |
| TCGA-24-1470 | TMEM131    | ENST00000186436 | p.K1272K | c.3816A>G | Verified   | ACT | CAA | GGT | 3 | A | G |
| TCGA-20-1685 | TMEM132B   | ENST00000299308 | p.E753E  | c.2259A>G | Unverified | GGT | GAA | GGA | 3 | A | G |
| TCGA-23-2077 | TMEM2      | ENST00000377044 | p.Q15Q   | c.45A>G   | Verified   | CTC | CAA | CCT | 3 | A | G |
| TCGA-23-1021 | TMEM67     | ENST00000453321 | p.N89S   | c.266A>G  | Verified   | TCT | AAT | AAT | 2 | A | G |
| TCGA-24-2267 | TMEM68     | ENST00000334667 | p.K143E  | c.427A>G  | Unverified | GCT | AAA | ATA | 1 | A | G |
| TCGA-61-1906 | TMEM87A    | ENST00000389834 | p.Y319C  | c.956A>G  | Unverified | GGA | TAT | GGC | 2 | A | G |
| TCGA-61-1906 | TMEM87A    | ENST00000389834 | p.Y319C  | c.956A>G  | Unverified | GGA | TAT | GGC | 2 | A | G |
| TCGA-13-0916 | TNFAIP3    | ENST00000237289 | p.N776S  | c.2327A>G | Verified   | tgc | aac | ggc | 2 | A | G |
| TCGA-24-1604 | TNRC6A     | ENST00000395799 | p.N528S  | c.1583A>G | Unverified | TCT | AAT | TAC | 2 | A | G |
| TCGA-13-0923 | TOP2B      | ENST00000435706 | p.Y857C  | c.2570A>G | Verified   | tgg | tat | att | 2 | A | G |
| TCGA-29-1764 | TOX3       | ENST00000219746 | p.K239R  | c.716A>G  | Unverified | GGC | AAG | AAG | 2 | A | G |
| TCGA-29-1764 | TOX3_ENSTC | ENST00000407228 | p.K234R  | c.701A>G  | Unverified | GGC | AAG | AAG | 2 | A | G |
| TCGA-04-1356 | TP53       | ENST00000269305 | p.Y220C  | c.659A>G  | Verified   | CCC | TAT | GAG | 2 | A | G |
| TCGA-04-1361 | TP53       | ENST00000269305 | p.Y234C  | c.701A>G  | Verified   | CAC | TAC | AAC | 2 | A | G |
| TCGA-04-1361 | TP53       | ENST00000269305 | p.Y234C  | c.701A>G  | Verified   | CAC | TAC | AAC | 2 | A | G |
| TCGA-13-0903 | TP53       | ENST00000269305 | p.Y205C  | c.614A>G  | Verified   | GAG | TAT | TTG | 2 | A | G |
| TCGA-24-1464 | TP53       | ENST00000269305 | p.N239S  | c.716A>G  | Verified   | TGT | AAC | AGT | 2 | A | G |
| TCGA-24-1616 | TP53       | ENST00000269305 | p.Y236C  | c.707A>G  | Verified   | AAC | TAC | ATG | 2 | A | G |
| TCGA-61-2012 | TP53       | ENST00000269305 | p.Y220C  | c.659A>G  | Verified   | CCC | TAT | GAG | 2 | A | G |
| TCGA-04-1356 | TP53_ENSTC | ENST00000269305 | p.Y220C  | c.659A>G  | Verified   | CCC | TAT | GAG | 2 | A | G |
| TCGA-61-2012 | TP53_ENSTC | ENST00000269305 | p.Y220C  | c.659A>G  | Verified   | CCC | TAT | GAG | 2 | A | G |
| TCGA-04-1356 | TP53_ENSTC | ENST00000413465 | p.Y220C  | c.659A>G  | Verified   | CCC | TAT | GAG | 2 | A | G |
| TCGA-61-2012 | TP53_ENSTC | ENST00000413465 | p.Y220C  | c.659A>G  | Verified   | CCC | TAT | GAG | 2 | A | G |
| TCGA-04-1356 | TP53_ENSTC | ENST00000545858 | p.Y127C  | c.380A>G  | Verified   | CCC | TAT | GAG | 2 | A | G |
| TCGA-61-2012 | TP53_ENSTC | ENST00000545858 | p.Y127C  | c.380A>G  | Verified   | CCC | TAT | GAG | 2 | A | G |
| TCGA-23-1123 | TPR        | ENST00000367478 | p.L454L  | c.1362A>G | Verified   | AGT | TTA | TCT | 3 | A | G |
| TCGA-23-1123 | TPR        | ENST00000367478 | p.L454L  | c.1362A>G | Verified   | AGT | TTA | TCT | 3 | A | G |
| TCGA-13-0885 | TRA2B      | ENST00000453386 | p.R62G   | c.184A>G  | Verified   | AGA | AGA | AGC | 1 | A | G |
| TCGA-30-1891 | TRA2B      | ENST00000453386 | p.N180S  | c.539A>G  | Unverified | GCC | AAT | GGA | 2 | A | G |
| TCGA-04-1652 | TRAK2      | ENST00000332624 | p.Q205Q  | c.615A>G  | Unverified | TCT | CAA | GGG | 3 | A | G |
| TCGA-04-1652 | TRAK2      | ENST00000332624 | p.Q205Q  | c.615A>G  | Unverified | TCT | CAA | GGG | 3 | A | G |



|              |                        |                 |          |            |            |     |     |     |   |   |   |
|--------------|------------------------|-----------------|----------|------------|------------|-----|-----|-----|---|---|---|
| TCGA-13-0923 | TRIP11                 | ENST00000267622 | p.L390L  | c.1170A>G  | Verified   | AGA | CTA | CAA | 3 | A | G |
| TCGA-29-1691 | TRPM4                  | ENST00000252826 | p.K492E  | c.1474A>G  | Unverified | CTA | AAA | GGG | 1 | A | G |
| TCGA-30-1855 | TSHZ1                  | ENST00000322038 | p.K809R  | c.2426A>G  | Unverified | CCC | AAG | TCC | 2 | A | G |
| TCGA-13-0904 | TTN_ENST00000356127    | ENST00000356127 | p.N8026S | c.24077A>G | Verified   | ATT | AAT | GAT | 2 | A | G |
| TCGA-23-1122 | TUBGCP2                | ENST00000252936 | p.Y423C  | c.1268A>G  | Unverified | GAT | TAC | AAC | 2 | A | G |
| TCGA-23-2078 | TUBGCP2                | ENST00000252936 | p.K770R  | c.2309A>G  | Unverified | ATG | AAA | TTA | 2 | A | G |
| TCGA-29-1705 | TUBGCP6                | ENST00000248846 | p.I667V  | c.1999A>G  | Unverified | GAA | ATT | GCA | 1 | A | G |
| TCGA-13-0755 | TXNIP                  | ENST00000369317 | p.K166R  | c.497A>G   | Verified   | GAA | AAG | AAA | 2 | A | G |
| TCGA-04-1343 | TYW3                   | ENST00000370867 | p.T76A   | c.226A>G   | Verified   | GTT | ACA | CAC | 1 | A | G |
| TCGA-24-1845 | UBAP2L                 | ENST00000361546 | p.T708A  | c.2122A>G  | Unverified | TCA | ACA | TCT | 1 | A | G |
| TCGA-24-1845 | UBAP2L_ENST00000343815 | ENST00000343815 | p.T708A  | c.2122A>G  | Unverified | TCA | ACA | TCT | 1 | A | G |
| TCGA-24-1845 | UBAP2L_ENST00000456955 | ENST00000456955 | p.T204A  | c.610A>G   | Unverified | TCA | ACA | TCT | 1 | A | G |
| TCGA-61-1907 | UBE2O                  | ENST00000319380 | p.T967A  | c.2899A>G  | Unverified | GCT | ACC | TCA | 1 | A | G |
| TCGA-61-1907 | UBE2O_ENST00000319380  | ENST00000319380 | p.T967A  | c.2899A>G  | Unverified | GCT | ACC | TCA | 1 | A | G |
| TCGA-13-0887 | UBL4B                  | ENST00000334179 | p.N64S   | c.191A>G   | Verified   | CCC | AAT | GCC | 2 | A | G |
| TCGA-04-1651 | UNC5C                  | ENST00000453304 | p.E132E  | c.396A>G   | Unverified | GTG | GAA | GAA | 3 | A | G |
| TCGA-04-1651 | UNC5C                  | ENST00000453304 | p.E132E  | c.396A>G   | Unverified | GTG | GAA | GAA | 3 | A | G |
| TCGA-13-0903 | UNC5D                  | ENST00000287272 | p.E311E  | c.933A>G   | Verified   | AGC | GAA | TGG | 3 | A | G |
| TCGA-20-0991 | USH2A                  | ENST00000307340 | p.N2560S | c.7679A>G  | Verified   | TCC | AAT | GGG | 2 | A | G |
| TCGA-61-2109 | USH2A                  | ENST00000307340 | p.N4244S | c.12731A>G | Verified   | TGG | AAT | TCA | 2 | A | G |
| TCGA-24-2289 | USP18                  | ENST00000215794 | p.K37R   | c.110A>G   | Unverified | atg | aag | aga | 2 | A | G |
| TCGA-29-1766 | USP54                  | NM_152586.2     | p.S242G  | c.724A>G   | Unverified | aga | agt | ttg | 1 | A | G |
| TCGA-29-1766 | USP54_ENST00000408019  | ENST00000408019 | p.S1154G | c.3460A>G  | Unverified | AGA | AGT | TTG | 1 | A | G |
| TCGA-29-1783 | VASH1                  | ENST00000167106 | p.K145E  | c.433A>G   | Unverified | ATT | AAG | AAG | 1 | A | G |
| TCGA-29-1783 | VASH1_ENST00000554237  | ENST00000554237 | p.K145E  | c.433A>G   | Unverified | ATT | AAG | AAG | 1 | A | G |
| TCGA-24-1616 | VCAN                   | ENST00000265077 | p.T2243A | c.6727A>G  | Verified   | CCA | ACA | ATT | 1 | A | G |
| TCGA-24-1849 | VPS13B                 | ENST00000358544 | p.L2557L | c.7671A>G  | Unverified | ctt | cta | gag | 3 | A | G |
| TCGA-24-1849 | VPS13B_ENST00000357162 | ENST00000357162 | p.L2532L | c.7596A>G  | Unverified | CTT | CTA | GAG | 3 | A | G |
| TCGA-30-1718 | WBP11                  | ENST00000261167 | p.E300E  | c.900A>G   | Unverified | AAT | GAA | GAA | 3 | A | G |
| TCGA-13-1481 | WDR1                   | ENST00000400001 | p.N545S  | c.1634A>G  | Verified   | GAC | AAT | GAA | 2 | A | G |
| TCGA-23-1124 | WIF1                   | ENST00000286574 | p.K364R  | c.1091A>G  | Verified   | CTT | AAA | AAG | 2 | A | G |
| TCGA-13-1489 | YSK4_ENST00000375845   | ENST00000375845 | p.S204G  | c.610A>G   | Verified   | CGA | AGC | ATC | 1 | A | G |
| TCGA-04-1652 | ZC3H12C                | ENST00000278590 | p.N353S  | c.1058A>G  | Unverified | TCC | AAT | GAT | 2 | A | G |
| TCGA-04-1652 | ZC3H12C                | ENST00000278590 | p.N353S  | c.1058A>G  | Unverified | TCC | AAT | GAT | 2 | A | G |

|              |            |                     |         |           |            |     |     |     |   |   |   |
|--------------|------------|---------------------|---------|-----------|------------|-----|-----|-----|---|---|---|
| TCGA-20-0991 | ZC3H4      | ENST00000253048     | p.K991R | c.2972A>G | Verified   | CCC | AAG | CAG | 2 | A | G |
| TCGA-13-0714 | ZCCHC11    | ENST00000257177     | p.N744S | c.2231A>G | Verified   | ACC | AAT | GGT | 2 | A | G |
| TCGA-30-1855 | ZCCHC11    | ENST00000257177     | p.E151E | c.453A>G  | Unverified | TCA | GAA | AAA | 3 | A | G |
| TCGA-24-1563 | ZFX        | ENST00000379188     | p.N314S | c.941A>G  | Verified   | TTA | AAT | GTT | 2 | A | G |
| TCGA-29-1764 | ZFYVE1     | ENST00000556143     | p.K209E | c.625A>G  | Unverified | TTT | AAA | ACC | 1 | A | G |
| TCGA-13-1507 | ZMYM6      | ENST00000357182     | p.N527S | c.1580A>G | Verified   | CCA | AAT | TTG | 2 | A | G |
| TCGA-24-2267 | ZMYM6      | ENST00000357182     | p.K223K | c.669A>G  | Verified   | TCA | AAA | TTT | 3 | A | G |
| TCGA-23-1124 | ZNF16      | ENST00000394909     | p.Y545C | c.1634A>G | Verified   | CCC | TAT | GAA | 2 | A | G |
| TCGA-13-1497 | ZNF182     | ENST00000396965     | p.N444S | c.1331A>G | Verified   | tca | aac | ctt | 2 | A | G |
| TCGA-10-0930 | ZNF189     | ENST00000339664     | p.Q307Q | c.921A>G  | Verified   | cat | caa | aga | 3 | A | G |
| TCGA-10-0930 | ZNF189     | ENST00000339664     | p.Q307Q | c.921A>G  | Verified   | cat | caa | aga | 3 | A | G |
| TCGA-13-0760 | ZNF202     | ENST00000336139     | p.T387A | c.1159A>G | Verified   | ACT | ACA | CCC | 1 | A | G |
| TCGA-29-1775 | ZNF227     | ENST00000313040     | p.K157E | c.469A>G  | Unverified | CCT | AAA | GGA | 1 | A | G |
| TCGA-30-1856 | ZNF251_ENS | ENST00000292562_v68 | p.K459R | c.1376A>G | Unverified | GAG | AAG | CCC | 2 | A | G |
| TCGA-13-1408 | ZNF281     | ENST00000367353     | p.N384S | c.1151A>G | Unverified | TCA | AAC | CAT | 2 | A | G |
| TCGA-23-1123 | ZNF285     | ENST00000330997     | p.K27R  | c.80A>G   | Verified   | GAT | AAA | GCC | 2 | A | G |
| TCGA-23-1123 | ZNF285     | ENST00000330997     | p.K27R  | c.80A>G   | Verified   | GAT | AAA | GCC | 2 | A | G |
| TCGA-24-1422 | ZNF292     | ENST00000339907     | p.V412V | c.1236A>G | Verified   | ATA | GTA | CGA | 3 | A | G |
| TCGA-09-1665 | ZNF333     | ENST00000292530     | p.K308E | c.922A>G  | Verified   | GAA | AAA | CTC | 1 | A | G |
| TCGA-24-0979 | ZNF341     | ENST00000342427     | p.Y601C | c.1802A>G | Verified   | CAT | TAT | CTC | 2 | A | G |
| TCGA-24-1469 | ZNF45      | ENST00000269973     | p.N76S  | c.227A>G  | Verified   | GAT | AAC | TCC | 2 | A | G |
| TCGA-13-1507 | ZNF479     | ENST00000331162     | p.R349G | c.1045A>G | Unverified | ACT | AGA | GAG | 1 | A | G |
| TCGA-24-1844 | ZNF614     | ENST00000270649     | p.I123V | c.367A>G  | Unverified | CCT | ATA | GTG | 1 | A | G |
| TCGA-29-2427 | ZNF621     | ENST00000339296     | p.Y207C | c.620A>G  | Verified   | CCC | TAT | GAA | 2 | A | G |
| TCGA-61-1899 | ZNF717     | ENST00000422325     | p.T86A  | c.256A>G  | Unverified | GAA | ACC | CCA | 1 | A | G |
| TCGA-04-1343 | ZNF724P    | ENST00000418100     | p.Y506C | c.1517A>G | Unverified | CCC | TAC | AAA | 2 | A | G |
| TCGA-29-1698 | ZNF79      | ENST00000342483     | p.Y204C | c.611A>G  | Unverified | AGT | TAC | TGT | 2 | A | G |
| TCGA-25-2401 | ZNF804B    | ENST00000333190     | p.V932V | c.2796A>G | Verified   | AGA | GTA | CAA | 3 | A | G |
| TCGA-13-0906 | ZNF823     | ENST00000341191     | p.T381A | c.1141A>G | Verified   | ATA | ACA | CAC | 1 | A | G |
| TCGA-13-0923 | ZNF823     | ENST00000341191     | p.Y527C | c.1580A>G | Verified   | CCA | TAT | GAA | 2 | A | G |
| TCGA-25-2042 | ZRANB1     | ENST00000359653     | p.N639S | c.1916A>G | Verified   | GGT | AAT | GAG | 2 | A | G |
| TCGA-29-1691 | ZSCAN20    | ENST00000326544     | p.K985R | c.2954A>G | Unverified | GAG | AAG | CCG | 2 | A | G |
| TCGA-04-1356 | ZSWIM2     | ENST00000295131     | p.K546R | c.1637A>G | Verified   | ACC | AAA | GGC | 2 | A | G |
| TCGA-13-1512 | ZZZ3       | ENST00000370801     | p.E491E | c.1473A>G | Verified   | TTT | GAA | TCA | 3 | A | G |

|              |            |                 |          |            |            |     |     |     |   |   |   |
|--------------|------------|-----------------|----------|------------|------------|-----|-----|-----|---|---|---|
| TCGA-23-1117 | AAMP       | ENST00000248450 | p.K254*  | c.760A>T   | Verified   | CTG | AAA | GGG | 1 | A | T |
| TCGA-23-1117 | AAMP       | ENST00000248450 | p.K254*  | c.760A>T   | Verified   | CTG | AAA | GGG | 1 | A | T |
| TCGA-61-2012 | ABCA4      | ENST00000370225 | p.T1497S | c.4489A>T  | Verified   | CTC | ACC | ATG | 1 | A | T |
| TCGA-09-2050 | ABCA5      | ENST00000392676 | p.S1308S | c.3924A>T  | Unverified | CTT | TCA | AGA | 3 | A | T |
| TCGA-29-1761 | ABCB4      | ENST00000359206 | p.D180V  | c.539A>T   | Unverified | GAT | GAC | ATC | 2 | A | T |
| TCGA-23-2077 | ABCF3      | ENST00000429586 | p.E518V  | c.1553A>T  | Verified   | CTC | GAG | TCT | 2 | A | T |
| TCGA-13-0792 | ACOT11     | ENST00000343744 | p.K144*  | c.430A>T   | Unverified | TGC | AAG | GCC | 1 | A | T |
| TCGA-24-2267 | ACSS1      | ENST00000323482 | p.E145V  | c.434A>T   | Verified   | AGG | GAA | CTA | 2 | A | T |
| TCGA-61-1900 | ACTRT2     | ENST00000378404 | p.Q53L   | c.158A>T   | Unverified | AAC | CAG | AAG | 2 | A | T |
| TCGA-61-1740 | ACVR1      | ENST00000263640 | p.I171F  | c.511A>T   | Unverified | CTC | ATC | ACC | 1 | A | T |
| TCGA-13-0900 | ADAMTS14   | NM_139155.1     | p.E608V  | c.1823A>T  | Verified   | gag | gag | tgc | 2 | A | T |
| TCGA-13-0913 | ADAMTS14   | NM_139155.1     | p.H635L  | c.1904A>T  | Unverified | aag | cac | agc | 2 | A | T |
| TCGA-24-1844 | ADAMTS8    | ENST00000257359 | p.S508S  | c.1524A>T  | Unverified | TGC | TCA | GAA | 3 | A | T |
| TCGA-24-1844 | ADAMTS8_E  | ENST00000257359 | p.S508S  | c.1524A>T  | Unverified | TGC | TCA | GAA | 3 | A | T |
| TCGA-24-1463 | ADCY9      | ENST00000294016 | p.R1310S | c.3930A>T  | Verified   | AAG | AGA | CCG | 3 | A | T |
| TCGA-13-1509 | AGTPBP1    | ENST00000376083 | p.A1003A | c.3009A>T  | Verified   | AAT | GCA | ACT | 3 | A | T |
| TCGA-04-1356 | AIF1       | ENST00000376059 | p.D66V   | c.197A>T   | Verified   | ATT | GAT | ATC | 2 | A | T |
| TCGA-04-1356 | AIF1_ENST0 | ENST00000376051 | p.D78V   | c.233A>T   | Verified   | CCA | GAT | ATC | 2 | A | T |
| TCGA-61-2113 | AKAP7      | NM_016377.2     | p.S169S  | c.507A>T   | Verified   | aac | tca | ctt | 3 | A | T |
| TCGA-23-1122 | ALPK1      | ENST00000458497 | p.T906S  | c.2716A>T  | Verified   | TGC | ACT | ACC | 1 | A | T |
| TCGA-13-0885 | ANK2       | ENST00000357077 | p.N793Y  | c.2377A>T  | Verified   | GCG | AAT | GGC | 1 | A | T |
| TCGA-61-1915 | ANKRD30A   | ENST00000361713 | p.E420V  | c.1259A>T  | Unverified | GAG | GAA | GAT | 2 | A | T |
| TCGA-09-2050 | ANKRD30A   | ENST00000361713 | p.T608T  | c.1824A>T  | Verified   | CAA | ACA | TTG | 3 | A | T |
| TCGA-13-1497 | ANKRD35    | ENST00000355594 | p.E655V  | c.1964A>T  | Verified   | CGG | GAG | TTT | 2 | A | T |
| TCGA-13-0916 | ANKRD44    | NM_153697.1     | p.D410V  | c.1229A>T  | Verified   | aag | gac | aag | 2 | A | T |
| TCGA-13-0714 | ANKRD5     | ENST00000378392 | p.R308S  | c.924A>T   | Unverified | GAG | AGA | ATC | 3 | A | T |
| TCGA-24-1845 | ANTXR2     | ENST00000307333 | p.T313T  | c.939A>T   | Unverified | GCC | ACA | GAA | 3 | A | T |
| TCGA-24-1845 | ANTXR2_EN  | ENST00000403729 | p.T313T  | c.939A>T   | Unverified | GCC | ACA | GAA | 3 | A | T |
| TCGA-23-1117 | AOC3       | ENST00000308423 | p.Q434L  | c.1301A>T  | Verified   | GAA | CAG | AAC | 2 | A | T |
| TCGA-23-1117 | AOC3       | ENST00000308423 | p.Q434L  | c.1301A>T  | Verified   | GAA | CAG | AAC | 2 | A | T |
| TCGA-29-1691 | AOX1       | ENST00000374700 | p.E724V  | c.2171A>T  | Unverified | CTG | GAA | TAT | 2 | A | T |
| TCGA-29-1703 | AP1G2      | ENST00000397120 | p.I468F  | c.1402A>T  | Unverified | GAC | ATT | TCC | 1 | A | T |
| TCGA-13-0923 | APAF1      | ENST00000551964 | p.E146V  | c.437A>T   | Verified   | ggt | gaa | cca | 2 | A | T |
| TCGA-29-1776 | APOB       | ENST00000233242 | p.D4169V | c.12506A>T | Unverified | AAG | GAT | AAC | 2 | A | T |

|              |            |                 |          |            |            |     |     |     |   |   |   |
|--------------|------------|-----------------|----------|------------|------------|-----|-----|-----|---|---|---|
| TCGA-61-1907 | APPL2      | ENST00000258530 | p.E661V  | c.1982A>T  | Unverified | GCA | GAA | TCC | 2 | A | T |
| TCGA-24-1844 | ARHGAP32   | ENST00000392657 | p.R296S  | c.888A>T   | Unverified | GAA | AGA | AAG | 3 | A | T |
| TCGA-24-1844 | ARHGAP32_  | ENST00000310343 | p.R645S  | c.1935A>T  | Unverified | GAA | AGA | AAG | 3 | A | T |
| TCGA-23-1031 | ARID5B     | ENST00000279873 | p.E498V  | c.1493A>T  | Verified   | ATA | GAA | GGG | 2 | A | T |
| TCGA-61-2095 | ARL4A      | ENST00000396662 | p.E109V  | c.326A>T   | Unverified | ATG | GAA | GAA | 2 | A | T |
| TCGA-13-0761 | ART3       | ENST00000349321 | p.S188S  | c.564A>T   | Verified   | TAT | TCA | GCC | 3 | A | T |
| TCGA-13-0761 | ART3       | ENST00000349321 | p.S188S  | c.564A>T   | Verified   | TAT | TCA | GCC | 3 | A | T |
| TCGA-24-1417 | ASAP1      | ENST00000357668 | p.K262*  | c.784A>T   | Unverified | TTG | AAA | CAG | 1 | A | T |
| TCGA-23-2078 | ASXL3      | ENST00000269197 | p.T760S  | c.2278A>T  | Verified   | TCC | ATA | AAT | 1 | A | T |
| TCGA-13-0714 | ASXL3_ENST | ENST00000269197 | p.T1480S | c.4438A>T  | Verified   | ACC | ACG | CTG | 1 | A | T |
| TCGA-09-0369 | ATG2A      | ENST00000377264 | p.D308V  | c.923A>T   | Verified   | ACA | GAC | CAC | 2 | A | T |
| TCGA-09-0369 | ATG2A      | ENST00000377264 | p.D308V  | c.923A>T   | Verified   | ACA | GAC | CAC | 2 | A | T |
| TCGA-13-0904 | ATP10D     | ENST00000273859 | p.D701V  | c.2102A>T  | Verified   | GGT | GAT | GCA | 2 | A | T |
| TCGA-61-2012 | ATP2B4     | ENST00000357681 | p.E1152V | c.3455A>T  | Verified   | GAA | GAG | GAG | 2 | A | T |
| TCGA-23-1122 | AXDND1     | ENST00000367618 | p.Q155L  | c.464A>T   | Verified   | TTA | CAG | TCA | 2 | A | T |
| TCGA-29-1769 | B4GALNT2   | ENST00000300404 | p.T537S  | c.1609A>T  | Unverified | AAG | ACC | TAC | 1 | A | T |
| TCGA-61-1913 | B4GALNT3   | ENST00000266383 | p.E607V  | c.1820A>T  | Unverified | GAG | GAA | GAG | 2 | A | T |
| TCGA-24-1464 | BCAS3      | ENST00000390652 | p.D811V  | c.2432A>T  | Verified   | TCT | GAT | CGA | 2 | A | T |
| TCGA-25-2401 | BCL7B      | ENST00000223368 | p.T52S   | c.154A>T   | Verified   | gtg | aca | gac | 1 | A | T |
| TCGA-13-0890 | BCORL1     | ENST00000218147 | p.N134Y  | c.400A>T   | Verified   | agc | aac | agc | 1 | A | T |
| TCGA-23-1124 | BDKRB2     | ENST00000554311 | p.I361F  | c.1081A>T  | Verified   | CCC | ATT | CAG | 1 | A | T |
| TCGA-24-2290 | BMP1       | ENST00000306385 | p.T780S  | c.2338A>T  | Verified   | AGC | ACC | CCC | 1 | A | T |
| TCGA-24-2290 | BMP1       | ENST00000306385 | p.T780S  | c.2338A>T  | Verified   | AGC | ACC | CCC | 1 | A | T |
| TCGA-23-1032 | BMP15      | ENST00000252677 | p.Q210L  | c.629A>T   | Verified   | TGT | CAG | CAG | 2 | A | T |
| TCGA-13-0793 | BRD8       | ENST00000254900 | p.I364F  | c.1090A>T  | Verified   | ATC | ATC | AAT | 1 | A | T |
| TCGA-04-1651 | BSN        | ENST00000296452 | p.A3392A | c.10176A>T | Unverified | CCT | GCA | GTC | 3 | A | T |
| TCGA-04-1651 | BSN        | ENST00000296452 | p.A3392A | c.10176A>T | Unverified | CCT | GCA | GTC | 3 | A | T |
| TCGA-23-1118 | C10orf2    | ENST00000311916 | p.I104F  | c.310A>T   | Verified   | TTC | ATT | GAC | 1 | A | T |
| TCGA-20-0990 | C11orf41   | ENST00000265654 | p.D11V   | c.32A>T    | Verified   | CAG | GAT | CTC | 2 | A | T |
| TCGA-30-1891 | C11orf82   | ENST00000430323 | p.I689F  | c.2065A>T  | Unverified | GAC | ATT | GCA | 1 | A | T |
| TCGA-24-1604 | C19orf75   | ENST00000316401 | p.K87*   | c.259A>T   | Verified   | GGG | AAG | AAC | 1 | A | T |
| TCGA-61-1733 | C1D        | ENST00000355848 | p.R111*  | c.331A>T   | Unverified | gac | aga | ggt | 1 | A | T |
| TCGA-61-1733 | C1D        | ENST00000355848 | p.R111*  | c.331A>T   | Unverified | gac | aga | ggt | 1 | A | T |
| TCGA-13-1510 | C20orf26   | ENST00000245957 | p.E817V  | c.2450A>T  | Verified   | GAA | GAG | GAT | 2 | A | T |

|              |            |                 |          |           |            |     |     |     |   |   |   |
|--------------|------------|-----------------|----------|-----------|------------|-----|-----|-----|---|---|---|
| TCGA-23-1031 | C2orf90    | ENST00000434864 | p.H17L   | c.50A>T   | Verified   | AAA | CAC | CAG | 2 | A | T |
| TCGA-61-2012 | C4BPA      | ENST00000367070 | p.E534V  | c.1601A>T | Unverified | CCA | GAG | GTG | 2 | A | T |
| TCGA-13-0885 | C4orf42    | ENST00000357591 | p.R34W   | c.100A>T  | Verified   | TGC | AGG | GAC | 1 | A | T |
| TCGA-23-1116 | C5orf45    | ENST00000292586 | p.P247P  | c.741A>T  | Unverified | CAG | CCA | AGG | 3 | A | T |
| TCGA-24-1850 | C6orf146   | ENST00000274673 | p.H298L  | c.893A>T  | Unverified | CAA | CAT | ATG | 2 | A | T |
| TCGA-24-1850 | C6orf72    | ENST00000367419 | p.S126C  | c.376A>T  | Unverified | TCC | AGT | TTG | 1 | A | T |
| TCGA-13-0760 | C9orf129   | ENST00000375419 | p.A147A  | c.441A>T  | Verified   | ACA | GCA | GCC | 3 | A | T |
| TCGA-23-1118 | CAPN9      | ENST00000354537 | p.D580V  | c.1739A>T | Verified   | GCT | GAC | AAG | 2 | A | T |
| TCGA-24-1417 | CARS       | ENST00000397111 | p.A500A  | c.1500A>T | Unverified | ACA | GCA | ATT | 3 | A | T |
| TCGA-13-0920 | CASS4      | ENST00000360314 | p.S254C  | c.760A>T  | Verified   | GCC | AGC | GTC | 1 | A | T |
| TCGA-25-2042 | CATSPER2   | ENST00000396879 | p.H31L   | c.92A>T   | Verified   | GAG | CAT | TTG | 2 | A | T |
| TCGA-24-1470 | CCDC11     | ENST00000398545 | p.S77C   | c.229A>T  | Verified   | GAC | AGC | CTT | 1 | A | T |
| TCGA-61-1737 | CCDC13     | ENST00000310232 | p.H82L   | c.245A>T  | Unverified | GAA | CAC | CTT | 2 | A | T |
| TCGA-24-1464 | CCDC141    | ENST00000343876 | p.D452V  | c.1355A>T | Verified   | GAA | GAT | GCA | 2 | A | T |
| TCGA-13-0807 | CCDC3      | ENST00000378825 | p.E195V  | c.584A>T  | Verified   | TTT | GAG | GAG | 2 | A | T |
| TCGA-13-0884 | CCDC33     | ENST00000398814 | p.M179L  | c.535A>T  | Verified   | CAC | ATG | GCT | 1 | A | T |
| TCGA-24-1846 | CCDC40     | ENST00000397545 | p.H349L  | c.1046A>T | Unverified | AGT | CAC | GAC | 2 | A | T |
| TCGA-24-1846 | CCDC40_EN  | ENST00000374877 | p.H349L  | c.1046A>T | Unverified | AGT | CAC | GAC | 2 | A | T |
| TCGA-61-1725 | CCDC80     | ENST00000206423 | p.N556Y  | c.1666A>T | Unverified | AAG | AAT | GAG | 1 | A | T |
| TCGA-25-2391 | CCDC80     | ENST00000206423 | p.R374S  | c.1122A>T | Unverified | GCA | AGA | CCT | 3 | A | T |
| TCGA-20-1683 | CCDC85A    | ENST00000407595 | p.G551G  | c.1653A>T | Unverified | AAA | GGA | CCA | 3 | A | T |
| TCGA-13-1481 | CCDC87     | ENST00000333861 | p.I84F   | c.250A>T  | Verified   | CTC | ATC | AAG | 1 | A | T |
| TCGA-24-1846 | CCL21      | ENST00000259607 | p.T112S  | c.334A>T  | Unverified | AAG | ACT | GGC | 1 | A | T |
| TCGA-04-1655 | CCT7       | ENST00000398422 | p.D114V  | c.341A>T  | Unverified | GAG | GAT | CTG | 2 | A | T |
| TCGA-04-1655 | CCT7_ENSTC | ENST00000258091 | p.D318V  | c.953A>T  | Unverified | GAG | GAT | CTG | 2 | A | T |
| TCGA-09-2056 | CDH9       | ENST00000231021 | p.D409V  | c.1226A>T | Verified   | TAC | GAT | CCA | 2 | A | T |
| TCGA-13-0885 | CDK5RAP2   | ENST00000349780 | p.T607S  | c.1819A>T | Verified   | aag | acc | ttg | 1 | A | T |
| TCGA-24-1843 | CEP350     | ENST00000367607 | p.Q2291L | c.6872A>T | Unverified | GAA | CAG | GGA | 2 | A | T |
| TCGA-24-1843 | CEP350_EN  | ENST00000367607 | p.Q2291L | c.6872A>T | Unverified | GAA | CAG | GGA | 2 | A | T |
| TCGA-10-0930 | CEP89      | ENST00000305768 | p.H323L  | c.968A>T  | Verified   | GTC | CAT | CGT | 2 | A | T |
| TCGA-10-0930 | CEP89      | ENST00000305768 | p.H323L  | c.968A>T  | Verified   | GTC | CAT | CGT | 2 | A | T |
| TCGA-13-0886 | CGNL1      | ENST00000281282 | p.R874R  | c.2622A>T | Verified   | ATA | CGA | CAG | 3 | A | T |
| TCGA-25-1326 | CHD1L      | NM_004284.2     | p.S562C  | c.1684A>T | Verified   | ggg | agc | aga | 1 | A | T |
| TCGA-29-1784 | CHD9       | NM_025134.3     | p.H146L  | c.437A>T  | Unverified | gga | cat | tca | 2 | A | T |

|              |           |                 |          |           |            |     |     |     |   |   |   |
|--------------|-----------|-----------------|----------|-----------|------------|-----|-----|-----|---|---|---|
| TCGA-13-0795 | CHGB      | ENST00000378961 | p.R469S  | c.1407A>T | Verified   | GAC | AGA | AAT | 3 | A | T |
| TCGA-24-1422 | CHST6     | ENST00000390664 | p.H249L  | c.746A>T  | Unverified | AGC | CAC | GTA | 2 | A | T |
| TCGA-61-2094 | CLCA1     | ENST00000234701 | p.S535C  | c.1603A>T | Unverified | CCC | AGT | GGA | 1 | A | T |
| TCGA-13-0919 | CLCN2     | ENST00000265593 | p.T679S  | c.2035A>T | Unverified | AAC | ACA | GAA | 1 | A | T |
| TCGA-04-1367 | CLIC6     | ENST00000349499 | p.D499V  | c.1496A>T | Verified   | GCA | GAC | CTG | 2 | A | T |
| TCGA-29-1698 | CLMN      | ENST00000298912 | p.E698V  | c.2093A>T | Unverified | TTG | GAG | ACC | 2 | A | T |
| TCGA-13-0920 | CLOCK     | ENST00000381322 | p.Q569L  | c.1706A>T | Verified   | CAA | CAA | TCA | 2 | A | T |
| TCGA-25-2392 | CMYA5     | ENST00000238522 | p.A1595A | c.4785A>T | Verified   | CCG | GCA | GTG | 3 | A | T |
| TCGA-29-1693 | CNIH4     | ENST00000465271 | p.M111L  | c.331A>T  | Unverified | CAC | ATG | AAA | 1 | A | T |
| TCGA-61-1740 | CNTN5     | ENST00000528682 | p.Q190L  | c.569A>T  | Unverified | ctg | cag | ttt | 2 | A | T |
| TCGA-61-1740 | CNTN5_ENS | ENST00000524871 | p.Q190L  | c.569A>T  | Unverified | CTG | CAG | TTT | 2 | A | T |
| TCGA-13-0923 | CNTNAP2   | ENST00000361727 | p.T737S  | c.2209A>T | Verified   | TGC | ACA | GAT | 1 | A | T |
| TCGA-09-2050 | COG8      | ENST00000306875 | p.E20V   | c.59A>T   | Verified   | GGC | GAG | GTG | 2 | A | T |
| TCGA-13-0893 | COL11A1   | ENST00000358392 | p.E290V  | c.869A>T  | Verified   | TCT | GAA | AAA | 2 | A | T |
| TCGA-20-1687 | COL4A1    | ENST00000375820 | p.E1083V | c.3248A>T | Unverified | GGA | GAA | AAA | 2 | A | T |
| TCGA-24-1563 | COL4A1    | ENST00000375820 | p.Q1051L | c.3152A>T | Verified   | GGG | CAG | GCA | 2 | A | T |
| TCGA-20-1687 | COL4A1_EN | ENST00000375815 | p.E726V  | c.2177A>T | Unverified | GGA | GAA | AAA | 2 | A | T |
| TCGA-13-1501 | COL4A6    | ENST00000334504 | p.G22G   | c.66A>T   | Verified   | GCG | GGA | GAG | 3 | A | T |
| TCGA-13-1501 | COL4A6    | ENST00000334504 | p.G22G   | c.66A>T   | Verified   | GCG | GGA | GAG | 3 | A | T |
| TCGA-13-0913 | COL5A1    | ENST00000371817 | p.P741P  | c.2223A>T | Verified   | CCT | CCA | GGA | 3 | A | T |
| TCGA-24-1104 | CR1       | ENST00000400960 | p.S1682C | c.5044A>T | Verified   | CCC | AGC | TAT | 1 | A | T |
| TCGA-23-2078 | CRTC2     | ENST00000368633 | p.P491P  | c.1473A>T | Verified   | TCC | CCA | AGT | 3 | A | T |
| TCGA-24-2288 | CSMD3     | ENST00000297405 | p.S1367C | c.4099A>T | Verified   | atc | agt | gac | 1 | A | T |
| TCGA-13-0900 | CSMD3     | ENST00000297405 | p.E689V  | c.2066A>T | Verified   | ttt | gaa | tgc | 2 | A | T |
| TCGA-29-1781 | CTAGE1    | ENST00000391403 | p.R214S  | c.642A>T  | Unverified | AAA | AGA | ACA | 3 | A | T |
| TCGA-29-1781 | CTAGE1_EN | ENST00000391403 | p.R214S  | c.642A>T  | Unverified | AAA | AGA | ACA | 3 | A | T |
| TCGA-24-1845 | CTNNA3    | NM_013266.1     | p.E180V  | c.539A>T  | Unverified | aag | gag | ctg | 2 | A | T |
| TCGA-24-1845 | CTNNA3_EN | ENST00000433211 | p.E180V  | c.539A>T  | Unverified | AAG | GAG | CTG | 2 | A | T |
| TCGA-09-1665 | CTSE      | ENST00000358184 | p.T282T  | c.846A>T  | Verified   | GAC | ACA | GGG | 3 | A | T |
| TCGA-13-1509 | CUBN      | ENST00000377833 | p.S1254C | c.3760A>T | Verified   | GAC | AGC | ATG | 1 | A | T |
| TCGA-04-1367 | CUX1      | ENST00000292535 | p.D14V   | c.41A>T   | Verified   | CTC | GAT | GCC | 2 | A | T |
| TCGA-04-1367 | CUX1_ENST | ENST00000292538 | p.D25V   | c.74A>T   | Verified   | CTC | GAT | GCC | 2 | A | T |
| TCGA-13-0923 | CYP24A1   | ENST00000216862 | p.N237Y  | c.709A>T  | Verified   | GTG | AAC | TTC | 1 | A | T |
| TCGA-04-1367 | CYTIP     | ENST00000264192 | p.S248C  | c.742A>T  | Verified   | AAG | AGC | TGG | 1 | A | T |

|              |            |                 |          |            |            |     |     |     |   |   |   |
|--------------|------------|-----------------|----------|------------|------------|-----|-----|-----|---|---|---|
| TCGA-29-1775 | DENND2A    | ENST00000275884 | p.Q545L  | c.1634A>T  | Unverified | AAG | CAG | GCG | 2 | A | T |
| TCGA-29-1699 | DENND5A    | ENST00000328194 | p.T688S  | c.2062A>T  | Unverified | TGG | ACG | AAA | 1 | A | T |
| TCGA-61-2008 | DHX34      | ENST00000328771 | p.Q52L   | c.155A>T   | Verified   | cgt | cag | ggt | 2 | A | T |
| TCGA-29-1775 | DNAH6      | ENST00000237449 | p.T497S  | c.1489A>T  | Unverified | GGG | ACC | CTT | 1 | A | T |
| TCGA-29-1785 | DNAH7      | ENST00000312428 | p.Q1594L | c.4781A>T  | Unverified | CTT | CAA | GTA | 2 | A | T |
| TCGA-29-1785 | DNAH7      | ENST00000312428 | p.Q1594L | c.4781A>T  | Unverified | CTT | CAA | GTA | 2 | A | T |
| TCGA-23-1122 | DNAH8      | NM_001371.1     | p.R3878S | c.11634A>T | Verified   | gca | aga | aag | 3 | A | T |
| TCGA-29-1775 | DNHL1      | ENST00000314395 | p.T76S   | c.226A>T   | Unverified | GGG | ACC | CTT | 1 | A | T |
| TCGA-24-1845 | DOCK7      | ENST00000340370 | p.D62V   | c.185A>T   | Unverified | GAA | GAT | TAC | 2 | A | T |
| TCGA-24-2280 | DPYD       | ENST00000370192 | p.R78*   | c.232A>T   | Unverified | ATG | AGA | TGC | 1 | A | T |
| TCGA-13-1510 | DROSHA     | ENST00000511367 | p.D929V  | c.2786A>T  | Unverified | GGA | GAC | AGA | 2 | A | T |
| TCGA-04-1336 | DSC2       | ENST00000280904 | p.K270*  | c.808A>T   | Verified   | GAC | AAA | GAT | 1 | A | T |
| TCGA-04-1367 | DSCAM      | ENST00000400454 | p.I1332F | c.3994A>T  | Verified   | ACG | ATT | GAT | 1 | A | T |
| TCGA-23-1123 | DSG4       | ENST00000308128 | p.R967S  | c.2901A>T  | Verified   | GAG | AGA | GTA | 3 | A | T |
| TCGA-23-1123 | DSG4       | ENST00000308128 | p.R967S  | c.2901A>T  | Verified   | GAG | AGA | GTA | 3 | A | T |
| TCGA-04-1652 | DST        | ENST00000370765 | p.H315L  | c.944A>T   | Unverified | AAT | CAT | AAA | 2 | A | T |
| TCGA-04-1652 | DST        | ENST00000370765 | p.H315L  | c.944A>T   | Unverified | AAT | CAT | AAA | 2 | A | T |
| TCGA-04-1652 | DST_ENST00 | ENST00000244364 | p.H315L  | c.944A>T   | Unverified | AAT | CAT | AAA | 2 | A | T |
| TCGA-04-1652 | DST_ENST00 | ENST00000244364 | p.H315L  | c.944A>T   | Unverified | AAT | CAT | AAA | 2 | A | T |
| TCGA-04-1652 | DST_ENST00 | ENST00000370765 | p.H315L  | c.944A>T   | Unverified | AAT | CAT | AAA | 2 | A | T |
| TCGA-04-1652 | DST_ENST00 | ENST00000370765 | p.H315L  | c.944A>T   | Unverified | AAT | CAT | AAA | 2 | A | T |
| TCGA-04-1652 | DST_ENST00 | ENST00000370769 | p.H641L  | c.1922A>T  | Unverified | AAT | CAT | AAA | 2 | A | T |
| TCGA-04-1652 | DST_ENST00 | ENST00000370769 | p.H641L  | c.1922A>T  | Unverified | AAT | CAT | AAA | 2 | A | T |
| TCGA-13-0761 | DYX1C1     | ENST00000321149 | p.E352V  | c.1055A>T  | Unverified | CTG | GAA | TTA | 2 | A | T |
| TCGA-13-0761 | DYX1C1     | ENST00000321149 | p.E352V  | c.1055A>T  | Unverified | CTG | GAA | TTA | 2 | A | T |
| TCGA-13-0791 | EEF1D      | ENST00000442189 | p.I377F  | c.1129A>T  | Verified   | aag | atc | tgg | 1 | A | T |
| TCGA-61-1915 | EFEMP1     | ENST00000394554 | p.K43*   | c.127A>T   | Unverified | TGC | AAA | GAT | 1 | A | T |
| TCGA-61-1914 | ELAVL2     | ENST00000380117 | p.G300G  | c.900A>T   | Unverified | TTT | GGA | GCT | 3 | A | T |
| TCGA-23-2077 | ELMO2      | ENST00000396391 | p.H284L  | c.851A>T   | Verified   | GCC | CAT | CAG | 2 | A | T |
| TCGA-13-0920 | ENSG000000 | ENST00000377171 | p.E309V  | c.926A>T   | Verified   | TGG | GAA | TGG | 2 | A | T |
| TCGA-23-1124 | ENSG000000 | ENST00000400226 | p.S539C  | c.1615A>T  | Verified   | CTG | AGT | TGG | 1 | A | T |
| TCGA-13-1488 | ENSG000000 | ENST00000402465 | p.D34V   | c.101A>T   | Verified   | AGA | GAT | GTG | 2 | A | T |
| TCGA-04-1331 | ENSG000000 | ENST00000513104 | p.D210V  | c.629A>T   | Unverified | AAA | GAC | TCC | 2 | A | T |
| TCGA-13-1488 | ENSG000000 | ENST00000513104 | p.D210V  | c.629A>T   | Unverified | AAA | GAC | TCC | 2 | A | T |

|              |            |                     |          |            |            |     |     |     |   |   |   |
|--------------|------------|---------------------|----------|------------|------------|-----|-----|-----|---|---|---|
| TCGA-23-1029 | ENTHD1     | ENST00000325157     | p.K184*  | c.550A>T   | Unverified | GAG | AAG | AAG | 1 | A | T |
| TCGA-29-1783 | ESF1       | ENST00000202816     | p.M743L  | c.2227A>T  | Unverified | CTC | ATG | AAA | 1 | A | T |
| TCGA-25-1313 | EVL        | ENST00000392920     | p.S331C  | c.991A>T   | Verified   | CGG | AGC | AAC | 1 | A | T |
| TCGA-24-1849 | EXOC7      | ENST00000357231     | p.D626V  | c.1877A>T  | Unverified | CCA | GAC | ACA | 2 | A | T |
| TCGA-29-1761 | F5         | ENST00000367797     | p.D552V  | c.1655A>T  | Unverified | TTT | GAT | GAG | 2 | A | T |
| TCGA-04-1530 | FABP3      | ENST00000373713     | p.D18V   | c.53A>T    | Unverified | TTC | GAT | GAC | 2 | A | T |
| TCGA-23-1117 | FAM153B    | ENST00000253490     | p.T104T  | c.312A>T   | Verified   | AGC | ACA | TGG | 3 | A | T |
| TCGA-23-1117 | FAM153B    | ENST00000253490     | p.T104T  | c.312A>T   | Verified   | AGC | ACA | TGG | 3 | A | T |
| TCGA-13-1510 | FAM46C     | ENST00000369448     | p.Q106L  | c.317A>T   | Unverified | TTT | CAG | CTG | 2 | A | T |
| TCGA-25-2392 | FAM55D     | ENST00000375478     | p.T312S  | c.934A>T   | Verified   | ATG | ACA | TCC | 1 | A | T |
| TCGA-23-1110 | FARP1      | ENST00000319562     | p.E353V  | c.1058A>T  | Unverified | aaa | gaa | gga | 2 | A | T |
| TCGA-24-1104 | FAT3_ENSTC | ENST00000298047_v61 | p.I2103F | c.6307A>T  | Verified   | CTG | ATT | TAT | 1 | A | T |
| TCGA-24-1847 | FAT4       | ENST00000330166     | p.T4249S | c.12745A>T | Unverified | CAC | ACT | TTT | 1 | A | T |
| TCGA-24-1847 | FAT4_ENSTC | ENST00000394329     | p.T4306S | c.12916A>T | Unverified | CAC | ACT | TTT | 1 | A | T |
| TCGA-13-0886 | FBXO16     | ENST00000380254     | p.E148V  | c.443A>T   | Verified   | TTT | GAG | CAG | 2 | A | T |
| TCGA-13-0755 | FEN1       | ENST00000305885     | p.E318V  | c.953A>T   | Verified   | tct | gag | gag | 2 | A | T |
| TCGA-13-1489 | FLG2       | ENST00000388718     | p.E443V  | c.1328A>T  | Verified   | TTC | GAA | CAA | 2 | A | T |
| TCGA-10-0930 | FNDC5      | ENST00000373471     | p.M66L   | c.196A>T   | Verified   | ACC | ATG | AAA | 1 | A | T |
| TCGA-10-0930 | FNDC5      | ENST00000373471     | p.M66L   | c.196A>T   | Verified   | ACC | ATG | AAA | 1 | A | T |
| TCGA-25-1313 | FOXB1_ENS  | ENST00000396057     | p.I172F  | c.514A>T   | Unverified | GCC | ATC | GAG | 1 | A | T |
| TCGA-09-1674 | FOXJ2      | ENST00000162391     | p.E562V  | c.1685A>T  | Unverified | aat | gag | gag | 2 | A | T |
| TCGA-13-0916 | FRG2       | ENST00000378763     | p.S52C   | c.154A>T   | Verified   | TCC | AGT | GAG | 1 | A | T |
| TCGA-09-2049 | GABBR1     | ENST00000377034     | p.G364G  | c.1092A>T  | Verified   | GTG | GGA | CTT | 3 | A | T |
| TCGA-13-0885 | GABRA5     | ENST00000335625     | p.D97V   | c.290A>T   | Verified   | ATA | GAC | GTG | 2 | A | T |
| TCGA-23-1111 | GABRE      | NM_021990           | p.T12S   | c.34A>T    | Unverified | cag | acc | tgg | 1 | A | T |
| TCGA-23-1111 | GABRE_ENS  | ENST00000370328     | p.T125S  | c.373A>T   | Unverified | CAG | ACC | TGG | 1 | A | T |
| TCGA-20-1683 | GABRG2     | ENST00000356592     | p.R233S  | c.699A>T   | Unverified | ACA | AGA | TCC | 3 | A | T |
| TCGA-61-1910 | GBP6       | ENST00000370456     | p.S253S  | c.759A>T   | Unverified | GTG | TCA | GAA | 3 | A | T |
| TCGA-13-0906 | GGA3       | ENST00000245541     | p.K575*  | c.1723A>T  | Unverified | CCG | AAG | GGG | 1 | A | T |
| TCGA-24-2290 | GGTLC2     | ENST00000215938     | p.S94S   | c.282A>T   | Verified   | CCC | TCA | CCT | 3 | A | T |
| TCGA-24-2290 | GGTLC2     | ENST00000215938     | p.S94S   | c.282A>T   | Verified   | CCC | TCA | CCT | 3 | A | T |
| TCGA-13-0890 | GIF        | ENST00000257248     | p.I153L  | c.457A>T   | Verified   | CCG | ATA | GCC | 1 | A | T |
| TCGA-23-1120 | GLI1       | ENST00000228682     | p.R1093S | c.3279A>T  | Unverified | ctg | aga | tcc | 3 | A | T |
| TCGA-29-1761 | GLT8D2     | ENST00000360814     | p.D125V  | c.374A>T   | Unverified | CCA | GAC | TCA | 2 | A | T |



|              |                       |                 |          |           |            |     |     |     |   |   |   |
|--------------|-----------------------|-----------------|----------|-----------|------------|-----|-----|-----|---|---|---|
| TCGA-13-0791 | GNAT3                 | ENST00000398291 | p.H322L  | c.965A>T  | Verified   | TCC | CAC | ATG | 2 | A | T |
| TCGA-13-1497 | GPLD1                 | ENST00000230036 | p.A286A  | c.858A>T  | Verified   | att | gca | tgt | 3 | A | T |
| TCGA-13-0923 | GPR98                 | ENST00000405460 | p.E2642V | c.7925A>T | Verified   | GGA | GAG | ATT | 2 | A | T |
| TCGA-61-1910 | GPR98                 | ENST00000405460 | p.S578S  | c.1734A>T | Unverified | ATA | TCA | AGG | 3 | A | T |
| TCGA-13-0906 | GRIN2A                | ENST00000396573 | p.T1223S | c.3667A>T | Verified   | ccc | acc | tat | 1 | A | T |
| TCGA-23-2078 | GRIP1                 | ENST00000398016 | p.P382P  | c.1146A>T | Verified   | AGC | CCA | CGT | 3 | A | T |
| TCGA-13-1497 | GYG1                  | ENST00000345003 | p.D113V  | c.338A>T  | Verified   | GAT | GAT | CTT | 2 | A | T |
| TCGA-13-0886 | GZMA                  | ENST00000274306 | p.I53F   | c.157A>T  | Verified   | ACC | ATC | TGT | 1 | A | T |
| TCGA-23-1120 | HAO1                  | ENST00000378789 | p.R46S   | c.138A>T  | Verified   | TCC | AGA | TGG | 3 | A | T |
| TCGA-13-1489 | HAUS1                 | ENST00000282058 | p.M276L  | c.826A>T  | Verified   | ATG | ATG | GAA | 1 | A | T |
| TCGA-20-0991 | HAUS6                 | ENST00000380502 | p.H888L  | c.2663A>T | Verified   | TTG | CAT | ACT | 2 | A | T |
| TCGA-24-1849 | HCK                   | ENST00000538448 | p.E479V  | c.1436A>T | Unverified | GAG | GAG | CGG | 2 | A | T |
| TCGA-24-1849 | HCK_ENST00000375852   | ENST00000375852 | p.E500V  | c.1499A>T | Unverified | AGC | CAG | TAC | 2 | A | T |
| TCGA-23-1022 | HCN4                  | ENST00000261917 | p.E321V  | c.962A>T  | Verified   | GTG | GAG | GAC | 2 | A | T |
| TCGA-04-1362 | HEPHL1                | ENST00000315765 | p.S1011C | c.3031A>T | Verified   | GAG | AGC | TTT | 1 | A | T |
| TCGA-25-2392 | HEXIM1                | ENST00000332499 | p.N17Y   | c.49A>T   | Verified   | AGC | AAC | TGT | 1 | A | T |
| TCGA-29-1777 | HHAT                  | ENST00000367010 | p.T489S  | c.1465A>T | Unverified | CAG | ACC | TAC | 1 | A | T |
| TCGA-29-1702 | HIRA                  | ENST00000263208 | p.D869V  | c.2606A>T | Unverified | GCA | GAC | TTT | 2 | A | T |
| TCGA-13-0762 | HMCN1                 | ENST00000271588 | p.E1917V | c.5750A>T | Verified   | CAT | GAA | CCA | 2 | A | T |
| TCGA-13-0762 | HMCN1                 | ENST00000271588 | p.E1917V | c.5750A>T | Verified   | CAT | GAA | CCA | 2 | A | T |
| TCGA-24-1104 | HOXB1                 | ENST00000239174 | p.S78C   | c.232A>T  | Verified   | CCC | AGC | TCC | 1 | A | T |
| TCGA-13-1499 | HSD3B2                | ENST00000369416 | p.E354V  | c.1061A>T | Verified   | GTG | GAG | TGG | 2 | A | T |
| TCGA-13-0913 | HSPBAP1               | ENST00000306103 | p.P114P  | c.342A>T  | Verified   | gga | cca | ttt | 3 | A | T |
| TCGA-24-0975 | HSPH1                 | ENST00000320027 | p.M174L  | c.520A>T  | Unverified | GAC | ATG | ACA | 1 | A | T |
| TCGA-13-0920 | HTN3                  | ENST00000526767 | p.M13L   | c.37A>T   | Verified   | CTC | ATG | CTT | 1 | A | T |
| TCGA-29-1775 | IDO1                  | ENST00000522495 | p.R58S   | c.174A>T  | Unverified | gaa | aga | gtt | 3 | A | T |
| TCGA-29-1761 | IFIH1                 | ENST00000263642 | p.N324Y  | c.970A>T  | Unverified | AAG | AAT | ATC | 1 | A | T |
| TCGA-13-0904 | IGDCC4                | ENST00000352385 | p.E156V  | c.467A>T  | Verified   | GAG | GAG | AAC | 2 | A | T |
| TCGA-13-0913 | IL7R                  | ENST00000303115 | p.T56S   | c.166A>T  | Verified   | CTG | ACC | TGT | 1 | A | T |
| TCGA-13-0904 | IQCC                  | ENST00000291358 | p.D304V  | c.911A>T  | Verified   | GAC | GAT | GGA | 2 | A | T |
| TCGA-29-1762 | ITGA8                 | ENST00000378076 | p.R763*  | c.2287A>T | Unverified | ATC | AGA | AGT | 1 | A | T |
| TCGA-04-1655 | ITPR1                 | ENST00000456211 | p.H594L  | c.1781A>T | Unverified | AAA | CAC | ATT | 2 | A | T |
| TCGA-04-1655 | ITPR1_ENST00000302640 | ENST00000302640 | p.H594L  | c.1781A>T | Unverified | AAA | CAC | ATT | 2 | A | T |
| TCGA-04-1655 | ITPR1_ENST00000357086 | ENST00000357086 | p.H609L  | c.1826A>T | Unverified | AAA | CAC | ATT | 2 | A | T |

|              |            |                 |          |           |            |     |     |     |   |   |   |
|--------------|------------|-----------------|----------|-----------|------------|-----|-----|-----|---|---|---|
| TCGA-13-1498 | ITPR2      | ENST00000381340 | p.T2444S | c.7330A>T | Unverified | ATG | ACT | TTA | 1 | A | T |
| TCGA-25-1318 | IVL        | ENST00000368764 | p.M280L  | c.838A>T  | Verified   | CAG | ATG | GGG | 1 | A | T |
| TCGA-25-1318 | IVL        | ENST00000368764 | p.M280L  | c.838A>T  | Verified   | CAG | ATG | GGG | 1 | A | T |
| TCGA-13-0761 | IVNS1ABP   | ENST00000367498 | p.A97A   | c.291A>T  | Verified   | AAA | GCA | GAT | 3 | A | T |
| TCGA-13-0761 | IVNS1ABP   | ENST00000367498 | p.A97A   | c.291A>T  | Verified   | AAA | GCA | GAT | 3 | A | T |
| TCGA-61-1725 | JAK3       | ENST00000458235 | p.I955F  | c.2863A>T | Unverified | AAC | ATC | CTC | 1 | A | T |
| TCGA-61-1725 | JAK3_ENST0 | ENST00000458235 | p.I955F  | c.2863A>T | Unverified | AAC | ATC | CTC | 1 | A | T |
| TCGA-29-1699 | KCNH1      | ENST00000271751 | p.T205S  | c.613A>T  | Unverified | AAG | ACT | CCC | 1 | A | T |
| TCGA-04-1338 | KCNJ15     | ENST00000398930 | p.K319*  | c.955A>T  | Verified   | TCC | AAA | AAT | 1 | A | T |
| TCGA-04-1649 | KIAA0020   | ENST00000397885 | p.H24L   | c.71A>T   | Unverified | TTT | CAT | AAA | 2 | A | T |
| TCGA-25-1313 | KIAA0100   | ENST00000005905 | p.N804Y  | c.2410A>T | Verified   | CGG | AAC | CCC | 1 | A | T |
| TCGA-13-1512 | KIAA0467_E | ENST00000372442 | p.E2284V | c.6851A>T | Verified   | GCT | GAG | CGG | 2 | A | T |
| TCGA-24-1422 | KIAA0913_E | ENST00000398706 | p.R1044W | c.3130A>T | Unverified | CAG | AGG | TCT | 1 | A | T |
| TCGA-29-1783 | KIAA0913_E | ENST00000398706 | p.S1261C | c.3781A>T | Unverified | AAC | AGC | AGC | 1 | A | T |
| TCGA-24-1422 | KIAA0913_E | ENST00000412131 | p.R1039W | c.3115A>T | Unverified | CAG | AGG | TCT | 1 | A | T |
| TCGA-29-1783 | KIAA0913_E | ENST00000412131 | p.S1256C | c.3766A>T | Unverified | AAC | AGC | AGC | 1 | A | T |
| TCGA-13-0903 | KIAA1407   | ENST00000295878 | p.E246V  | c.737A>T  | Verified   | GAG | GAA | GAG | 2 | A | T |
| TCGA-13-0714 | KIF4A      | ENST00000374403 | p.P71P   | c.213A>T  | Verified   | gcg | cca | ctc | 3 | A | T |
| TCGA-24-2280 | KRTAP20-2  | ENST00000330798 | p.G57G   | c.171A>T  | Unverified | TAT | GGA | AGA | 3 | A | T |
| TCGA-24-1843 | LAMA1      | ENST00000389658 | p.D2794V | c.8381A>T | Unverified | AGT | GAT | GGC | 2 | A | T |
| TCGA-29-1781 | LASS3      | ENST00000284382 | p.K171*  | c.511A>T  | Unverified | CCC | AAA | CAG | 1 | A | T |
| TCGA-20-1687 | LASS4      | ENST00000251363 | p.E24V   | c.71A>T   | Unverified | ACA | GAG | CTA | 2 | A | T |
| TCGA-25-2392 | LCOR       | ENST00000371103 | p.K150*  | c.448A>T  | Verified   | CTC | AAA | GTT | 1 | A | T |
| TCGA-13-1512 | LHX4       | ENST00000263726 | p.R259R  | c.777A>T  | Verified   | TTC | CGA | GAG | 3 | A | T |
| TCGA-29-1784 | LILRA1     | ENST00000251372 | p.T119T  | c.357A>T  | Unverified | GTG | ACA | GGA | 3 | A | T |
| TCGA-61-1906 | LIN9       | ENST00000328205 | p.T171T  | c.513A>T  | Unverified | AAA | ACA | AGA | 3 | A | T |
| TCGA-61-1906 | LIN9       | ENST00000328205 | p.T171T  | c.513A>T  | Unverified | AAA | ACA | AGA | 3 | A | T |
| TCGA-04-1336 | LNX2       | ENST00000316334 | p.E25V   | c.74A>T   | Verified   | ttt | gaa | tgt | 2 | A | T |
| TCGA-13-1510 | LOC65121   | ENST00000332296 | p.G253G  | c.759A>T  | Unverified | CAA | GGA | CGG | 3 | A | T |
| TCGA-24-1849 | LPHN3      | ENST00000512091 | p.N380Y  | c.1138A>T | Unverified | TGG | AAT | AAC | 1 | A | T |
| TCGA-24-1849 | LPHN3_ENS' | ENST00000512091 | p.N380Y  | c.1138A>T | Unverified | TGG | AAT | AAC | 1 | A | T |
| TCGA-24-1849 | LPHN3_ENS' | ENST00000514591 | p.N380Y  | c.1138A>T | Unverified | TGG | AAT | AAC | 1 | A | T |
| TCGA-29-1775 | LRBA       | ENST00000357115 | p.P2497P | c.7491A>T | Unverified | AGT | CCA | TTG | 3 | A | T |
| TCGA-29-1775 | LRFN2      | ENST00000338305 | p.E281V  | c.842A>T  | Unverified | CGT | GAG | GAG | 2 | A | T |

|              |            |                     |          |            |            |     |     |     |   |   |   |
|--------------|------------|---------------------|----------|------------|------------|-----|-----|-----|---|---|---|
| TCGA-24-2289 | LRP1B      | ENST00000389484     | p.D2299V | c.6896A>T  | Unverified | GTG | GAC | CAG | 2 | A | T |
| TCGA-61-2094 | LRP6       | ENST00000261349     | p.G1467G | c.4401A>T  | Unverified | ACA | GGA | GCA | 3 | A | T |
| TCGA-30-1857 | LRRC16B    | ENST00000342740     | p.S342C  | c.1024A>T  | Unverified | CTG | AGC | AAG | 1 | A | T |
| TCGA-04-1651 | LRRIQ4     | ENST00000340806     | p.Q435L  | c.1304A>T  | Unverified | AAG | CAA | CTT | 2 | A | T |
| TCGA-04-1651 | LRRIQ4     | ENST00000340806     | p.Q435L  | c.1304A>T  | Unverified | AAG | CAA | CTT | 2 | A | T |
| TCGA-24-1845 | LTBR       | ENST00000228918     | p.D147V  | c.440A>T   | Unverified | TCT | GAC | TGC | 2 | A | T |
| TCGA-13-0920 | LUZP4      | ENST00000371920     | p.Q94L   | c.281A>T   | Verified   | tcc | caa | aaa | 2 | A | T |
| TCGA-24-2035 | MACF1      | ENST00000360115     | p.M3554L | c.10660A>T | Verified   | ATG | ATG | GAA | 1 | A | T |
| TCGA-24-2035 | MACF1_ENS  | ENST00000361689     | p.M3052L | c.9154A>T  | Verified   | ATG | ATG | GAA | 1 | A | T |
| TCGA-61-2113 | MAGI1_ENS  | ENST00000402939     | p.E1324V | c.3971A>T  | Unverified | CCA | GAG | AAG | 2 | A | T |
| TCGA-04-1331 | MALL       | ENST00000272462     | p.T98S   | c.292A>T   | Verified   | GGG | ACC | ACT | 1 | A | T |
| TCGA-04-1367 | MAN1B1     | ENST00000371589     | p.E117V  | c.350A>T   | Unverified | GAG | GAA | GAG | 2 | A | T |
| TCGA-13-0900 | MAP4       | ENST00000360240     | p.D16V   | c.47A>T    | Verified   | CCA | GAC | ATT | 2 | A | T |
| TCGA-23-1022 | MATN2      | ENST00000520016     | p.E246V  | c.737A>T   | Verified   | CTG | GAG | CAT | 2 | A | T |
| TCGA-61-1914 | MBOAT1     | ENST00000324607     | p.R108*  | c.322A>T   | Unverified | CAC | AGA | TAT | 1 | A | T |
| TCGA-61-2095 | MCM10      | ENST00000361282     | p.H374L  | c.1121A>T  | Verified   | GAT | CAT | CCT | 2 | A | T |
| TCGA-61-2102 | MDM1       | ENST00000303145     | p.Q667L  | c.2000A>T  | Verified   | TTG | CAG | TTA | 2 | A | T |
| TCGA-13-0883 | MED19      | ENST00000337672     | p.Q169L  | c.506A>T   | Verified   | ATT | CAG | CCT | 2 | A | T |
| TCGA-24-1423 | MGAM_ENS   | ENST00000549489     | p.Q520L  | c.1559A>T  | Verified   | AAT | CAA | GTA | 2 | A | T |
| TCGA-24-1845 | MGC42105   | ENST00000326035     | p.I283F  | c.847A>T   | Unverified | AGC | ATC | CTC | 1 | A | T |
| TCGA-25-1313 | MGEA5      | ENST00000361464     | p.E818V  | c.2453A>T  | Verified   | GCT | GAG | AAA | 2 | A | T |
| TCGA-13-1509 | MGST2      | ENST00000265498     | p.N138Y  | c.412A>T   | Verified   | CTC | AAT | ATT | 1 | A | T |
| TCGA-13-1507 | MLH1       | ENST00000231790     | p.N187Y  | c.559A>T   | Verified   | cac | aat | gca | 1 | A | T |
| TCGA-23-1029 | MLLT10_EN: | ENST00000307729     | p.D379V  | c.1136A>T  | Unverified | ACA | GAC | TCA | 2 | A | T |
| TCGA-23-1029 | MLLT10_EN: | ENST00000377072_v68 | p.D379V  | c.1136A>T  | Unverified | ACA | GAC | TCA | 2 | A | T |
| TCGA-24-1103 | MLLT4      | ENST00000366809     | p.R1419* | c.4255A>T  | Verified   | CGG | AGA | GAG | 1 | A | T |
| TCGA-13-0755 | MPP1       | ENST00000369534     | p.G83G   | c.249A>T   | Verified   | atg | gga | atc | 3 | A | T |
| TCGA-24-1469 | MPP5       | ENST00000261681     | p.N615Y  | c.1843A>T  | Verified   | AAG | AAT | CCA | 1 | A | T |
| TCGA-13-1510 | MRE11A     | ENST00000323977     | p.T199T  | c.597A>T   | Unverified | gta | aca | atg | 3 | A | T |
| TCGA-24-2288 | MRPL54     | ENST00000330133     | p.G28G   | c.84A>T    | Unverified | TCC | GGA | AGA | 3 | A | T |
| TCGA-09-2049 | MTL5       | ENST00000255087     | p.H443L  | c.1328A>T  | Verified   | AGT | CAC | GAT | 2 | A | T |
| TCGA-23-1032 | MTMR8      | ENST00000374852     | p.N143Y  | c.427A>T   | Verified   | ccc | aac | aga | 1 | A | T |
| TCGA-23-1117 | MTPP       | ENST00000265517     | p.Q872L  | c.2615A>T  | Verified   | CAT | CAA | GAG | 2 | A | T |
| TCGA-23-1117 | MTPP       | ENST00000265517     | p.Q872L  | c.2615A>T  | Verified   | CAT | CAA | GAG | 2 | A | T |

|              |           |                 |          |           |            |     |     |     |   |   |   |
|--------------|-----------|-----------------|----------|-----------|------------|-----|-----|-----|---|---|---|
| TCGA-24-1847 | MUC17     | ENST00000306151 | p.Q1078L | c.3233A>T | Unverified | TCT | CAA | GCC | 2 | A | T |
| TCGA-25-1326 | MUC17     | ENST00000306151 | p.S2182S | c.6546A>T | Unverified | CTT | TCA | ACA | 3 | A | T |
| TCGA-13-1507 | MYH1      | ENST00000226207 | p.D754V  | c.2261A>T | Verified   | ATT | GAC | ATT | 2 | A | T |
| TCGA-13-0885 | MYH2      | ENST00000245503 | p.Q1634L | c.4901A>T | Verified   | ATC | CAG | CTG | 2 | A | T |
| TCGA-29-1784 | MYH4      | ENST00000255381 | p.K1026* | c.3076A>T | Unverified | ACC | AAA | GCT | 1 | A | T |
| TCGA-36-1577 | MYH4      | ENST00000255381 | p.A1694A | c.5082A>T | Verified   | AGG | GCA | TCC | 3 | A | T |
| TCGA-04-1347 | MYH8      | ENST00000403437 | p.R1132R | c.3396A>T | Verified   | TCC | CGA | GCC | 3 | A | T |
| TCGA-61-2012 | MYO15A    | ENST00000205890 | p.A2129A | c.6387A>T | Unverified | CTG | GCA | CAG | 3 | A | T |
| TCGA-13-0793 | MYO1A     | ENST00000300119 | p.T676T  | c.2028A>T | Verified   | aag | aca | aag | 3 | A | T |
| TCGA-25-2042 | MYO7B     | ENST00000272666 | p.H1225L | c.3674A>T | Unverified | ATG | CAC | ATC | 2 | A | T |
| TCGA-24-1604 | MYOT      | ENST00000239926 | p.D209V  | c.626A>T  | Unverified | CAA | GAC | TCG | 2 | A | T |
| TCGA-29-2427 | MYST4     | ENST00000287239 | p.Q1194L | c.3581A>T | Verified   | TTC | CAG | CAT | 2 | A | T |
| TCGA-13-1481 | MYT1L     | ENST00000399161 | p.H486L  | c.1457A>T | Verified   | AGC | CAT | GTC | 2 | A | T |
| TCGA-24-2267 | NBAS      | ENST00000281513 | p.I2150F | c.6448A>T | Verified   | GAC | ATT | GAG | 1 | A | T |
| TCGA-13-0906 | NBPF7     | ENST00000401014 | p.D273V  | c.818A>T  | Verified   | CAG | GAT | GCT | 2 | A | T |
| TCGA-23-1809 | NCAM2     | ENST00000400546 | p.D200V  | c.599A>T  | Unverified | CGT | GAT | ATC | 2 | A | T |
| TCGA-23-1029 | NCCRP1    | ENST00000339852 | p.G222G  | c.666A>T  | Unverified | AGA | GGA | CCC | 3 | A | T |
| TCGA-23-1118 | NCOA3     | ENST00000371998 | p.D359V  | c.1076A>T | Verified   | aat | gat | cga | 2 | A | T |
| TCGA-24-2289 | NDRG4     | ENST00000394279 | p.Q111L  | c.332A>T  | Unverified | TCG | CAG | TTT | 2 | A | T |
| TCGA-04-1331 | NDUFAF2   | ENST00000296597 | p.S16S   | c.48A>T   | Unverified | CTG | TCA | AGG | 3 | A | T |
| TCGA-13-0893 | NEUROD1   | ENST00000295108 | p.K39*   | c.115A>T  | Verified   | AAG | AAG | GAG | 1 | A | T |
| TCGA-13-0762 | NEUROD4   | ENST00000242994 | p.K74*   | c.220A>T  | Verified   | AAG | AAA | AAG | 1 | A | T |
| TCGA-13-0762 | NEUROD4   | ENST00000242994 | p.K74*   | c.220A>T  | Verified   | AAG | AAA | AAG | 1 | A | T |
| TCGA-61-1740 | NGLY1     | ENST00000280700 | p.D335V  | c.1004A>T | Unverified | ACA | GAC | CAT | 2 | A | T |
| TCGA-61-1910 | NICN1     | ENST00000273598 | p.G92G   | c.276A>T  | Unverified | GAG | GGA | GCC | 3 | A | T |
| TCGA-23-1111 | NIPSNAP3A | ENST00000374767 | p.H195L  | c.584A>T  | Unverified | GTT | CAT | GTT | 2 | A | T |
| TCGA-23-1031 | NLRP14    | ENST00000299481 | p.G745G  | c.2235A>T | Verified   | AAT | GGA | GTA | 3 | A | T |
| TCGA-09-2051 | NNT       | ENST00000264663 | p.D919V  | c.2756A>T | Unverified | ATT | GAC | ATG | 2 | A | T |
| TCGA-29-1693 | NOMO3     | ENST00000399336 | p.D262V  | c.785A>T  | Unverified | CAA | GAC | GAG | 2 | A | T |
| TCGA-24-1470 | NPVF      | ENST00000222674 | p.T16S   | c.46A>T   | Verified   | GCC | ACT | TCA | 1 | A | T |
| TCGA-13-1499 | NQO2      | ENST00000380430 | p.S108C  | c.322A>T  | Verified   | TTC | AGC | GTG | 1 | A | T |
| TCGA-04-1367 | NR2F2     | ENST00000394166 | p.R109W  | c.325A>T  | Verified   | cgg | agg | aac | 1 | A | T |
| TCGA-23-1110 | NR6A1     | ENST00000487099 | p.I62F   | c.184A>T  | Verified   | ctc | att | tgt | 1 | A | T |
| TCGA-24-2035 | NRK       | SU_ZC4-NRK      | p.Q552L  | c.1655A>T | Verified   | gag | cag | aac | 2 | A | T |

|              |           |                 |          |           |            |     |     |     |   |   |   |
|--------------|-----------|-----------------|----------|-----------|------------|-----|-----|-----|---|---|---|
| TCGA-13-0791 | NRXN1     | ENST00000342183 | p.H146L  | c.437A>T  | Verified   | CTG | CAT | ATA | 2 | A | T |
| TCGA-23-1120 | NSMCE2    | ENST00000287437 | p.T188S  | c.562A>T  | Unverified | CAC | ACC | TAT | 1 | A | T |
| TCGA-61-2012 | NUDCD1    | ENST00000239690 | p.T283S  | c.847A>T  | Verified   | CAG | ACT | GAA | 1 | A | T |
| TCGA-24-1847 | ODZ2_ENST | ENST00000518659 | p.H981L  | c.2942A>T | Unverified | CTA | CAC | TTT | 2 | A | T |
| TCGA-24-1847 | ODZ2_ENST | ENST00000519204 | p.H860L  | c.2579A>T | Unverified | CTA | CAC | TTT | 2 | A | T |
| TCGA-04-1530 | OLFM3     | ENST00000370103 | p.R64W   | c.190A>T  | Unverified | AGC | AGG | CAA | 1 | A | T |
| TCGA-23-1110 | OR10J1    | ENST00000423932 | p.I120F  | c.358A>T  | Verified   | GGC | ATC | ACT | 1 | A | T |
| TCGA-13-0919 | OR11A1    | ENST00000377149 | p.T283S  | c.847A>T  | Verified   | GTC | ACC | CCT | 1 | A | T |
| TCGA-23-1809 | OR2A4     | ENST00000315453 | p.M257L  | c.769A>T  | Unverified | ATC | ATG | TAT | 1 | A | T |
| TCGA-24-1464 | OR4C16    | ENST00000314634 | p.K86*   | c.256A>T  | Verified   | TTG | AAG | AAG | 1 | A | T |
| TCGA-10-0930 | OR4C46    | ENST00000328188 | p.E194V  | c.581A>T  | Verified   | CTG | GAA | CTC | 2 | A | T |
| TCGA-10-0930 | OR4C46    | ENST00000328188 | p.E194V  | c.581A>T  | Verified   | CTG | GAA | CTC | 2 | A | T |
| TCGA-29-1761 | OR4D9     | ENST00000329328 | p.T37T   | c.111A>T  | Unverified | ATG | ACA | ACT | 3 | A | T |
| TCGA-61-1740 | OR52E8    | ENST00000537935 | p.R239R  | c.717A>T  | Unverified | GCT | CGA | CTC | 3 | A | T |
| TCGA-13-0791 | OR5K2     | ENST00000427338 | p.T146T  | c.438A>T  | Verified   | ACC | ACA | GGC | 3 | A | T |
| TCGA-61-1910 | OR5W2     | ENST00000344514 | p.N294Y  | c.880A>T  | Unverified | AGG | AAC | AAG | 1 | A | T |
| TCGA-13-1499 | PADI4     | ENST00000375448 | p.Q358L  | c.1073A>T | Verified   | ATC | CAA | GCC | 2 | A | T |
| TCGA-04-1342 | PANK4     | ENST00000378466 | p.E395V  | c.1184A>T | Unverified | CCC | GAG | CTC | 2 | A | T |
| TCGA-24-0979 | PARP14    | ENST00000310276 | p.T912T  | c.2736A>T | Verified   | GGC | ACA | GTG | 3 | A | T |
| TCGA-13-0920 | PASD1     | ENST00000370357 | p.S678S  | c.2034A>T | Verified   | GAC | TCA | ACC | 3 | A | T |
| TCGA-13-1507 | PCDH1     | ENST00000287008 | p.D745V  | c.2234A>T | Verified   | TTT | GAC | TCT | 2 | A | T |
| TCGA-61-1738 | PCDHA2    | ENST00000378132 | p.I104F  | c.310A>T  | Unverified | AGC | ATC | CAC | 1 | A | T |
| TCGA-61-1738 | PCDHA2    | ENST00000378132 | p.I104F  | c.310A>T  | Unverified | AGC | ATC | CAC | 1 | A | T |
| TCGA-61-1738 | PCDHA2_EN | ENST00000526136 | p.I104F  | c.310A>T  | Unverified | AGC | ATC | CAC | 1 | A | T |
| TCGA-61-1738 | PCDHA2_EN | ENST00000526136 | p.I104F  | c.310A>T  | Unverified | AGC | ATC | CAC | 1 | A | T |
| TCGA-25-2401 | PCDHB14   | ENST00000239449 | p.H129L  | c.386A>T  | Verified   | GAT | CAC | TCC | 2 | A | T |
| TCGA-13-1488 | PCDHGC4   | ENST00000306593 | p.D78V   | c.233A>T  | Verified   | GTG | GAT | TTG | 2 | A | T |
| TCGA-24-1104 | PDCD6IP   | ENST00000307296 | p.T586T  | c.1758A>T | Verified   | ttg | aca | gcc | 3 | A | T |
| TCGA-23-1120 | PDE12     | ENST00000311180 | p.E134V  | c.401A>T  | Unverified | GCT | GAG | GAC | 2 | A | T |
| TCGA-25-2391 | PDZD2     | ENST00000282493 | p.D776V  | c.2327A>T | Unverified | GGG | GAT | CAA | 2 | A | T |
| TCGA-61-1910 | PHIP      | ENST00000275034 | p.Q1263L | c.3788A>T | Unverified | GAT | CAG | ACT | 2 | A | T |
| TCGA-24-2289 | PHLDB1    | ENST00000361417 | p.S273C  | c.817A>T  | Unverified | CCC | AGT | GGG | 1 | A | T |
| TCGA-24-1563 | PHLDB2    | ENST00000412622 | p.A393A  | c.1179A>T | Verified   | GAG | GCA | GAT | 3 | A | T |
| TCGA-13-0792 | PIGZ      | ENST00000412723 | p.E181V  | c.542A>T  | Verified   | ATT | GAG | GGA | 2 | A | T |

|              |             |                 |          |           |            |     |     |     |   |   |   |
|--------------|-------------|-----------------|----------|-----------|------------|-----|-----|-----|---|---|---|
| TCGA-13-0904 | PIGZ        | ENST00000412723 | p.G5G    | c.15A>T   | Verified   | TGT | GGA | TCC | 3 | A | T |
| TCGA-29-1770 | PIK3CB      | ENST00000477593 | p.S4C    | c.10A>T   | Unverified | ttc | agt | ttc | 1 | A | T |
| TCGA-30-1891 | PKHD1L1     | ENST00000378402 | p.T170S  | c.508A>T  | Unverified | TTC | ACT | GAT | 1 | A | T |
| TCGA-13-0762 | PKP1        | ENST00000367324 | p.R340S  | c.1020A>T | Verified   | AGG | AGA | ACC | 3 | A | T |
| TCGA-13-0762 | PKP1        | ENST00000367324 | p.R340S  | c.1020A>T | Verified   | AGG | AGA | ACC | 3 | A | T |
| TCGA-09-2049 | PKP4        | ENST00000389759 | p.K790*  | c.2368A>T | Verified   | AAG | AAG | AAA | 1 | A | T |
| TCGA-04-1655 | PLCH1       | ENST00000334686 | p.N866Y  | c.2596A>T | Unverified | AAC | AAT | TCC | 1 | A | T |
| TCGA-04-1655 | PLCH1_ENST  | ENST00000340059 | p.N904Y  | c.2710A>T | Unverified | AAC | AAT | TCC | 1 | A | T |
| TCGA-13-1498 | PLD1        | ENST00000351298 | p.H608L  | c.1823A>T | Verified   | TTT | CAC | CCG | 2 | A | T |
| TCGA-29-1693 | PLD1        | ENST00000351298 | p.R339R  | c.1017A>T | Unverified | CAT | CGA | TTT | 3 | A | T |
| TCGA-04-1651 | PLEK        | ENST00000234313 | p.A83A   | c.249A>T  | Unverified | CAG | GCA | GCC | 3 | A | T |
| TCGA-04-1651 | PLEK        | ENST00000234313 | p.A83A   | c.249A>T  | Unverified | CAG | GCA | GCC | 3 | A | T |
| TCGA-29-1781 | PLXNA4_ENST | ENST00000321063 | p.D1031V | c.3092A>T | Unverified | CAG | GAC | CTG | 2 | A | T |
| TCGA-24-1845 | PLXNA4_ENST | ENST00000321063 | p.A1831A | c.5493A>T | Unverified | AAC | GCA | TAC | 3 | A | T |
| TCGA-29-1781 | PLXNA4_ENST | ENST00000321063 | p.D1031V | c.3092A>T | Unverified | CAG | GAC | CTG | 2 | A | T |
| TCGA-24-1845 | PLXNA4_ENST | ENST00000321063 | p.A1831A | c.5493A>T | Unverified | AAC | GCA | TAC | 3 | A | T |
| TCGA-04-1649 | PNLDC1      | ENST00000275275 | p.S417C  | c.1249A>T | Unverified | CCC | AGT | ATC | 1 | A | T |
| TCGA-13-1488 | PNMT        | ENST00000269582 | p.P189P  | c.567A>T  | Verified   | AGC | CCA | GAT | 3 | A | T |
| TCGA-23-1123 | PNP         | ENST00000361505 | p.E201V  | c.602A>T  | Verified   | ttt | gag | act | 2 | A | T |
| TCGA-23-1123 | PNP         | ENST00000361505 | p.E201V  | c.602A>T  | Verified   | ttt | gag | act | 2 | A | T |
| TCGA-10-0930 | PPFIA2      | ENST00000549396 | p.G607G  | c.1821A>T | Verified   | att | gga | gta | 3 | A | T |
| TCGA-10-0930 | PPFIA2      | ENST00000549396 | p.G607G  | c.1821A>T | Verified   | att | gga | gta | 3 | A | T |
| TCGA-23-1032 | PPP1R3A     | NM_002711.2     | p.D580V  | c.1739A>T | Verified   | gca | gat | gtg | 2 | A | T |
| TCGA-13-1510 | PPP1R3A     | NM_002711.2     | p.G413G  | c.1239A>T | Verified   | atg | gga | gaa | 3 | A | T |
| TCGA-13-1510 | PRAMEF1     | ENST00000332296 | p.G253G  | c.759A>T  | Unverified | CAA | GGA | CGG | 3 | A | T |
| TCGA-29-1763 | PREX1       | ENST00000371941 | p.Q796L  | c.2387A>T | Unverified | GCC | CAG | GAA | 2 | A | T |
| TCGA-29-1763 | PREX1_ENST  | ENST00000396220 | p.Q796L  | c.2387A>T | Unverified | GCC | CAG | GAA | 2 | A | T |
| TCGA-29-1784 | PRKAG2      | ENST00000287878 | p.Q337L  | c.1010A>T | Unverified | GTA | CAG | ATT | 2 | A | T |
| TCGA-29-1784 | PRKAG2_ENST | ENST00000433631 | p.Q212L  | c.635A>T  | Unverified | GTA | CAG | ATT | 2 | A | T |
| TCGA-29-1691 | PRPF3       | ENST00000324862 | p.R518R  | c.1554A>T | Unverified | GCC | CGA | AAA | 3 | A | T |
| TCGA-29-1698 | PSEN2       | ENST00000366783 | p.I255F  | c.763A>T  | Unverified | GTC | ATC | CTG | 1 | A | T |
| TCGA-13-1498 | PTCH2       | ENST00000372192 | p.K158*  | c.472A>T  | Verified   | aac | aaa | atc | 1 | A | T |
| TCGA-61-1738 | PTGR2       | ENST00000267568 | p.T157T  | c.471A>T  | Unverified | AAG | ACA | ATG | 3 | A | T |
| TCGA-61-1738 | PTGR2       | ENST00000267568 | p.T157T  | c.471A>T  | Unverified | AAG | ACA | ATG | 3 | A | T |

|              |            |                 |          |            |            |     |     |     |   |   |   |
|--------------|------------|-----------------|----------|------------|------------|-----|-----|-----|---|---|---|
| TCGA-04-1338 | PTPN3      | ENST00000394831 | p.H812L  | c.2435A>T  | Verified   | GAC | CAC | GGT | 2 | A | T |
| TCGA-24-1843 | PTPRZ1     | ENST00000393386 | p.I470L  | c.1408A>T  | Unverified | CGC | ATA | GGG | 1 | A | T |
| TCGA-24-1843 | PTPRZ1_ENS | ENST00000393386 | p.I470L  | c.1408A>T  | Unverified | CGC | ATA | GGG | 1 | A | T |
| TCGA-61-2095 | PTRF       | ENST00000357037 | p.E77V   | c.230A>T   | Unverified | GAG | GAG | CGG | 2 | A | T |
| TCGA-23-1022 | PYHIN1     | ENST00000368140 | p.Q397L  | c.1190A>T  | Verified   | ATC | CAG | ATA | 2 | A | T |
| TCGA-61-1740 | RAB37      | ENST00000402449 | p.T55S   | c.163A>T   | Unverified | GCC | ACT | GTG | 1 | A | T |
| TCGA-61-1740 | RAB37_ENS  | ENST00000402449 | p.T55S   | c.163A>T   | Unverified | GCC | ACT | GTG | 1 | A | T |
| TCGA-61-1910 | RAMP3      | ENST00000242249 | p.T31T   | c.93A>T    | Unverified | GAG | ACA | GGC | 3 | A | T |
| TCGA-13-1408 | RASA3      | ENST00000334062 | p.R88W   | c.262A>T   | Unverified | cgg | agg | gat | 1 | A | T |
| TCGA-13-0893 | RCSD1      | ENST00000367854 | p.I86F   | c.256A>T   | Verified   | CTG | ATT | GAG | 1 | A | T |
| TCGA-25-2392 | RFX6       | ENST00000332958 | p.Q15L   | c.44A>T    | Verified   | GCG | CAG | CCT | 2 | A | T |
| TCGA-04-1362 | RIMS2      | ENST00000507740 | p.H825L  | c.2474A>T  | Verified   | CAT | CAC | AGG | 2 | A | T |
| TCGA-04-1362 | RIMS2_ENS  | ENST00000436393 | p.H811L  | c.2432A>T  | Verified   | CAT | CAC | AGG | 2 | A | T |
| TCGA-20-0991 | RNF111     | ENST00000348370 | p.R904S  | c.2712A>T  | Verified   | GAA | AGA | TGT | 3 | A | T |
| TCGA-23-1031 | RPH3A      | ENST00000389385 | p.E72V   | c.215A>T   | Verified   | ATG | GAG | CAG | 2 | A | T |
| TCGA-13-1498 | RSPO2      | ENST00000276659 | p.P79P   | c.237A>T   | Verified   | TGC | CCA | TCC | 3 | A | T |
| TCGA-13-1505 | RSRC2      | ENST00000331738 | p.K23*   | c.67A>T    | Verified   | AAG | AAA | AAA | 1 | A | T |
| TCGA-23-1117 | RYR1       | ENST00000359596 | p.E5V    | c.14A>T    | Unverified | GCA | GAA | GGC | 2 | A | T |
| TCGA-23-1117 | RYR1       | ENST00000359596 | p.E5V    | c.14A>T    | Unverified | GCA | GAA | GGC | 2 | A | T |
| TCGA-24-0975 | RYR1       | ENST00000359596 | p.E4691V | c.14072A>T | Verified   | ACG | GAG | CAG | 2 | A | T |
| TCGA-30-1714 | RYR1       | ENST00000359596 | p.R1993S | c.5979A>T  | Unverified | GCA | AGA | CGT | 3 | A | T |
| TCGA-61-1910 | RYR2       | ENST00000366574 | p.N1945Y | c.5833A>T  | Unverified | TAC | AAC | GAA | 1 | A | T |
| TCGA-13-0903 | RYR2       | ENST00000366574 | p.D3896V | c.11687A>T | Verified   | AAA | GAT | GTT | 2 | A | T |
| TCGA-24-1463 | RYR2       | ENST00000366574 | p.E4906V | c.14717A>T | Verified   | TTT | GAA | ACC | 2 | A | T |
| TCGA-13-1498 | RYR2       | ENST00000366574 | p.G4711G | c.14133A>T | Verified   | CTA | GGA | GTC | 3 | A | T |
| TCGA-29-1761 | RYR3       | ENST00000389232 | p.R279S  | c.837A>T   | Unverified | ATC | AGA | TGG | 3 | A | T |
| TCGA-61-2113 | SBF2       | ENST00000256190 | p.D705V  | c.2114A>T  | Verified   | CCT | GAT | GAC | 2 | A | T |
| TCGA-23-1117 | SCAI       | ENST00000373549 | p.Q44L   | c.131A>T   | Verified   | TCA | CAA | TCT | 2 | A | T |
| TCGA-23-1117 | SCAI       | ENST00000373549 | p.Q44L   | c.131A>T   | Verified   | TCA | CAA | TCT | 2 | A | T |
| TCGA-13-0795 | SCN1A      | ENST00000375405 | p.I1639F | c.4915A>T  | Verified   | CTG | ATC | AAA | 1 | A | T |
| TCGA-13-1509 | SCN1A      | ENST00000375405 | p.R1514R | c.4542A>T  | Verified   | CCT | CGA | CCA | 3 | A | T |
| TCGA-04-1652 | SCN3A      | ENST00000283254 | p.T399T  | c.1197A>T  | Unverified | AAA | ACA | TAC | 3 | A | T |
| TCGA-04-1652 | SCN3A      | ENST00000283254 | p.T399T  | c.1197A>T  | Unverified | AAA | ACA | TAC | 3 | A | T |
| TCGA-04-1652 | SCN3A_ENS  | ENST00000409101 | p.T399T  | c.1197A>T  | Unverified | AAA | ACA | TAC | 3 | A | T |

|              |            |                 |          |           |            |     |     |     |   |   |   |
|--------------|------------|-----------------|----------|-----------|------------|-----|-----|-----|---|---|---|
| TCGA-04-1652 | SCN3A_ENS  | ENST00000409101 | p.T399T  | c.1197A>T | Unverified | AAA | ACA | TAC | 3 | A | T |
| TCGA-29-1696 | SCN7A      | ENST00000409855 | p.E291V  | c.872A>T  | Unverified | CGA | GAA | ACA | 2 | A | T |
| TCGA-29-1696 | SCN7A      | ENST00000409855 | p.E291V  | c.872A>T  | Unverified | CGA | GAA | ACA | 2 | A | T |
| TCGA-29-1696 | SCN7A_ENS  | ENST00000409855 | p.E291V  | c.872A>T  | Unverified | CGA | GAA | ACA | 2 | A | T |
| TCGA-29-1696 | SCN7A_ENS  | ENST00000409855 | p.E291V  | c.872A>T  | Unverified | CGA | GAA | ACA | 2 | A | T |
| TCGA-04-1367 | SCRN1      | ENST00000242059 | p.S241C  | c.721A>T  | Verified   | GAC | AGC | TTA | 1 | A | T |
| TCGA-04-1362 | SCRN2      | ENST00000290216 | p.D296V  | c.887A>T  | Verified   | CAG | GAT | CCC | 2 | A | T |
| TCGA-24-1845 | SELV       | ENST00000335426 | p.H318L  | c.953A>T  | Unverified | GTC | CAT | TCC | 2 | A | T |
| TCGA-61-1899 | SEMA3C     | ENST00000265361 | p.Q638L  | c.1913A>T | Unverified | GAC | CAA | GGA | 2 | A | T |
| TCGA-29-1764 | SERPINB4   | ENST00000341074 | p.S380C  | c.1138A>T | Unverified | aac | agc | atc | 1 | A | T |
| TCGA-29-1769 | SETBP1     | ENST00000282030 | p.T1423S | c.4267A>T | Unverified | TCC | ACC | AAG | 1 | A | T |
| TCGA-13-0920 | SF3A1      | ENST00000215793 | p.K102*  | c.304A>T  | Verified   | TTC | AAG | GAA | 1 | A | T |
| TCGA-23-1022 | SH3TC2     | ENST00000515425 | p.E1045V | c.3134A>T | Verified   | GCT | GAG | GCC | 2 | A | T |
| TCGA-13-1496 | SI         | ENST00000264382 | p.I1034F | c.3100A>T | Verified   | AAG | ATT | TAT | 1 | A | T |
| TCGA-29-1770 | SIGLEC8    | ENST00000321424 | p.T327S  | c.979A>T  | Unverified | TTC | ACC | TGC | 1 | A | T |
| TCGA-30-1855 | SIM2       | ENST00000290399 | p.M198L  | c.592A>T  | Unverified | GAC | ATG | TCC | 1 | A | T |
| TCGA-13-0791 | SLC12A1    | ENST00000380993 | p.D285V  | c.854A>T  | Verified   | GTA | GAT | CTT | 2 | A | T |
| TCGA-09-0369 | SLC1A7     | ENST00000371494 | p.I472F  | c.1414A>T | Verified   | GGG | ATC | ATG | 1 | A | T |
| TCGA-09-0369 | SLC1A7     | ENST00000371494 | p.I472F  | c.1414A>T | Verified   | GGG | ATC | ATG | 1 | A | T |
| TCGA-25-2401 | SLC20A1    | ENST00000272542 | p.E259V  | c.776A>T  | Verified   | ATT | GAA | CGA | 2 | A | T |
| TCGA-61-2095 | SLC22A18   | ENST00000380574 | p.R419W  | c.1255A>T | Verified   | CAG | AGG | AAG | 1 | A | T |
| TCGA-04-1530 | SLC25A44   | ENST00000359511 | p.M243L  | c.727A>T  | Unverified | CCC | ATG | GAT | 1 | A | T |
| TCGA-04-1530 | SLC26A7    | ENST00000276609 | p.G367G  | c.1101A>T | Unverified | ATG | GGA | AGG | 3 | A | T |
| TCGA-25-1318 | SLC37A3    | ENST00000326232 | p.E134V  | c.401A>T  | Verified   | ACA | GAA | TGG | 2 | A | T |
| TCGA-25-1318 | SLC37A3    | ENST00000326232 | p.E134V  | c.401A>T  | Verified   | ACA | GAA | TGG | 2 | A | T |
| TCGA-09-1674 | SLC38A11   | ENST00000303735 | p.S123S  | c.369A>T  | Unverified | ATT | TCA | CTG | 3 | A | T |
| TCGA-61-2012 | SLC45A2    | ENST00000296589 | p.M342L  | c.1024A>T | Verified   | TTC | ATG | GGC | 1 | A | T |
| TCGA-30-1855 | SLC4A10    | ENST00000415876 | p.Q417L  | c.1250A>T | Unverified | TCC | CAG | GAG | 2 | A | T |
| TCGA-30-1855 | SLC4A10_EM | ENST00000446997 | p.Q447L  | c.1340A>T | Unverified | TCC | CAG | GAG | 2 | A | T |
| TCGA-13-1509 | SLC4A4     | ENST00000340595 | p.H386L  | c.1157A>T | Verified   | GGA | CAT | GGG | 2 | A | T |
| TCGA-10-0930 | SLC9A10    | ENST00000305815 | p.M234L  | c.700A>T  | Verified   | TGG | ATG | TCA | 1 | A | T |
| TCGA-10-0930 | SLC9A10    | ENST00000305815 | p.M234L  | c.700A>T  | Verified   | TGG | ATG | TCA | 1 | A | T |
| TCGA-13-1507 | SLCO1B1    | ENST00000256958 | p.H451L  | c.1352A>T | Verified   | TCT | CAT | AGA | 2 | A | T |
| TCGA-24-1847 | SLCO1C1    | ENST00000266509 | p.R627S  | c.1881A>T | Unverified | AGT | AGA | GGA | 3 | A | T |



|              |            |                 |          |           |            |     |     |     |   |   |   |
|--------------|------------|-----------------|----------|-----------|------------|-----|-----|-----|---|---|---|
| TCGA-24-1847 | SLCO1C1_EN | ENST00000381552 | p.R627S  | c.1881A>T | Unverified | AGT | AGA | GGA | 3 | A | T |
| TCGA-61-2094 | SLCO2B1    | ENST00000289575 | p.I664F  | c.1990A>T | Unverified | GTG | ATC | TGC | 1 | A | T |
| TCGA-24-2280 | SLIT1      | ENST00000266058 | p.I495F  | c.1483A>T | Unverified | TTC | ATT | CCA | 1 | A | T |
| TCGA-25-2400 | SMARCC2    | ENST00000267064 | p.Q478L  | c.1433A>T | Verified   | CCC | CAA | GAG | 2 | A | T |
| TCGA-13-0885 | SMARCD3    | ENST00000392811 | p.R282W  | c.844A>T  | Verified   | aac | agg | ctg | 1 | A | T |
| TCGA-24-2290 | SMC5       | ENST00000361138 | p.R309R  | c.927A>T  | Verified   | TGT | CGA | ATT | 3 | A | T |
| TCGA-24-2290 | SMC5       | ENST00000361138 | p.R309R  | c.927A>T  | Verified   | TGT | CGA | ATT | 3 | A | T |
| TCGA-13-0913 | SMS        | ENST00000404933 | p.I181F  | c.541A>T  | Unverified | gcc | atc | atg | 1 | A | T |
| TCGA-24-1845 | SORBS2     | ENST00000284776 | p.R686*  | c.2056A>T | Unverified | ccc | aga | agg | 1 | A | T |
| TCGA-13-0884 | SOX5       | ENST00000451604 | p.E214V  | c.641A>T  | Verified   | cga | gag | cag | 2 | A | T |
| TCGA-20-0991 | SP1        | ENST00000327443 | p.A580A  | c.1740A>T | Verified   | ACA | GCA | GGT | 3 | A | T |
| TCGA-29-1696 | SPAG6      | ENST00000376624 | p.S231S  | c.693A>T  | Unverified | CTT | TCA | GCT | 3 | A | T |
| TCGA-29-1696 | SPAG6      | ENST00000376624 | p.S231S  | c.693A>T  | Unverified | CTT | TCA | GCT | 3 | A | T |
| TCGA-13-1510 | SPARC      | ENST00000231061 | p.T177S  | c.529A>T  | Unverified | GTC | ACC | CTG | 1 | A | T |
| TCGA-25-2042 | SPCS3      | ENST00000503362 | p.D79V   | c.236A>T  | Unverified | TTT | GAT | TGG | 2 | A | T |
| TCGA-24-1604 | SPR        | ENST00000234454 | p.K226*  | c.676A>T  | Verified   | CTG | AAG | GCA | 1 | A | T |
| TCGA-24-2267 | STAG2      | ENST00000371160 | p.E721V  | c.2162A>T | Verified   | atc | gaa | aat | 2 | A | T |
| TCGA-23-1114 | STARD8     | ENST00000252336 | p.E693V  | c.2078A>T | Unverified | CGA | GAG | GTG | 2 | A | T |
| TCGA-23-1114 | STARD8_EN! | ENST00000252336 | p.E693V  | c.2078A>T | Unverified | CGA | GAG | GTG | 2 | A | T |
| TCGA-23-1114 | STARD8_EN! | ENST00000374599 | p.E773V  | c.2318A>T | Unverified | CGA | GAG | GTG | 2 | A | T |
| TCGA-29-1761 | STIP1      | ENST00000305218 | p.E419V  | c.1256A>T | Unverified | GAG | GAA | TGT | 2 | A | T |
| TCGA-23-2078 | SYT14      | ENST00000472886 | p.D137V  | c.410A>T  | Verified   | TAT | GAT | GGA | 2 | A | T |
| TCGA-13-0762 | SYT6       | ENST00000369546 | p.I348F  | c.1042A>T | Unverified | ATC | ATC | TTT | 1 | A | T |
| TCGA-13-0762 | SYT6       | ENST00000369546 | p.I348F  | c.1042A>T | Unverified | ATC | ATC | TTT | 1 | A | T |
| TCGA-04-1331 | SYTL4      | ENST00000372989 | p.H476L  | c.1427A>T | Verified   | GAT | CAT | TGC | 2 | A | T |
| TCGA-13-1512 | SZT2       | ENST00000372442 | p.E2284V | c.6851A>T | Verified   | GCT | GAG | CGG | 2 | A | T |
| TCGA-13-0913 | TANC1      | ENST00000263635 | p.K1418* | c.4252A>T | Verified   | TGC | AAA | CAA | 1 | A | T |
| TCGA-29-1702 | TARBP1     | ENST00000040877 | p.S912C  | c.2734A>T | Unverified | GGG | AGT | GAA | 1 | A | T |
| TCGA-23-1120 | TBC1D21    | ENST00000300504 | p.Q158L  | c.473A>T  | Verified   | ACG | CAG | GCA | 2 | A | T |
| TCGA-13-0903 | TBK1       | ENST00000331710 | p.R525S  | c.1575A>T | Verified   | AGC | AGA | TTA | 3 | A | T |
| TCGA-23-1116 | TCEAL3     | ENST00000372628 | p.E39V   | c.116A>T  | Unverified | GTG | GAG | GGG | 2 | A | T |
| TCGA-24-1843 | TCP11L2    | ENST00000299045 | p.Q14L   | c.41A>T   | Unverified | GAC | CAG | CCA | 2 | A | T |
| TCGA-13-1408 | TECPR2     | ENST00000359520 | p.E628V  | c.1883A>T | Unverified | GGG | GAA | GAC | 2 | A | T |
| TCGA-23-1031 | TEKT3      | ENST00000395930 | p.E163V  | c.488A>T  | Verified   | CAT | GAG | TTG | 2 | A | T |

|              |            |                 |          |           |            |     |     |     |   |   |   |
|--------------|------------|-----------------|----------|-----------|------------|-----|-----|-----|---|---|---|
| TCGA-61-1740 | TEKT4      | ENST00000295201 | p.K123*  | c.367A>T  | Unverified | CAG | AAG | CAA | 1 | A | T |
| TCGA-13-0913 | TEX101     | ENST00000253435 | p.A87A   | c.261A>T  | Verified   | AAA | GCA | GGG | 3 | A | T |
| TCGA-09-2044 | THAP9      | ENST00000302236 | p.E776V  | c.2327A>T | Verified   | TGT | GAG | CGA | 2 | A | T |
| TCGA-24-1422 | TIE1       | ENST00000372476 | p.S190C  | c.568A>T  | Unverified | TCG | AGC | GGC | 1 | A | T |
| TCGA-13-1497 | TJP1       | ENST00000346128 | p.E957V  | c.2870A>T | Verified   | CTG | GAG | GAG | 2 | A | T |
| TCGA-23-1021 | TMEM39A    | ENST00000319172 | p.N31Y   | c.91A>T   | Verified   | GGC | AAT | GGA | 1 | A | T |
| TCGA-09-2049 | TMEM45A    | ENST00000323523 | p.T222S  | c.664A>T  | Verified   | CTC | ACC | ATA | 1 | A | T |
| TCGA-23-1111 | TMPO_ENST  | ENST00000266732 | p.M457L  | c.1369A>T | Unverified | CTG | ATG | TCT | 1 | A | T |
| TCGA-61-1907 | TNNI3K     | ENST00000326637 | p.H518L  | c.1553A>T | Unverified | aat | cat | ccc | 2 | A | T |
| TCGA-61-1913 | TNPO1      | ENST00000506351 | p.D543V  | c.1628A>T | Unverified | tac | gat | gcc | 2 | A | T |
| TCGA-24-1844 | TNR        | ENST00000367674 | p.P976P  | c.2928A>T | Unverified | GCA | CCA | GTG | 3 | A | T |
| TCGA-04-1331 | TNS3       | ENST00000311160 | p.S1048S | c.3144A>T | Verified   | GCG | TCA | CCG | 3 | A | T |
| TCGA-61-2095 | TOM1       | ENST00000449058 | p.K480*  | c.1438A>T | Unverified | AAG | AAG | ACC | 1 | A | T |
| TCGA-09-2050 | TP63       | ENST00000264731 | p.M107L  | c.319A>T  | Verified   | ccc | atg | tgg | 1 | A | T |
| TCGA-13-0906 | TPO        | ENST00000345913 | p.H805L  | c.2414A>T | Verified   | gcc | cac | ccc | 2 | A | T |
| TCGA-29-1775 | TRHR       | ENST00000518632 | p.S349C  | c.1045A>T | Unverified | tac | agt | gtg | 1 | A | T |
| TCGA-29-1761 | TRIML2     | ENST00000512729 | p.D318V  | c.953A>T  | Unverified | TTG | GAC | ACA | 2 | A | T |
| TCGA-04-1331 | TRPC7      | ENST00000513104 | p.D210V  | c.629A>T  | Unverified | AAA | GAC | TCC | 2 | A | T |
| TCGA-13-1488 | TRPC7      | ENST00000513104 | p.D210V  | c.629A>T  | Unverified | AAA | GAC | TCC | 2 | A | T |
| TCGA-29-1781 | TRPV3      | ENST00000576742 | p.I277F  | c.829A>T  | Unverified | GAG | ATT | GTG | 1 | A | T |
| TCGA-24-1422 | TRPV4      | ENST00000261740 | p.N204Y  | c.610A>T  | Verified   | AGC | AAT | GGC | 1 | A | T |
| TCGA-20-1685 | TTF2       | ENST00000369466 | p.T694S  | c.2080A>T | Unverified | ATC | ACT | ACC | 1 | A | T |
| TCGA-61-1733 | TTN        | NM_003319       | p.I370F  | c.1108A>T | Unverified | cag | atc | agg | 1 | A | T |
| TCGA-61-1733 | TTN        | NM_003319       | p.I370F  | c.1108A>T | Unverified | cag | atc | agg | 1 | A | T |
| TCGA-61-1733 | TTN_ENST00 | ENST00000342175 | p.I370F  | c.1108A>T | Unverified | CAG | ATC | AGG | 1 | A | T |
| TCGA-61-1733 | TTN_ENST00 | ENST00000342175 | p.I370F  | c.1108A>T | Unverified | CAG | ATC | AGG | 1 | A | T |
| TCGA-61-1733 | TTN_ENST00 | ENST00000342992 | p.I370F  | c.1108A>T | Unverified | CAG | ATC | AGG | 1 | A | T |
| TCGA-61-1733 | TTN_ENST00 | ENST00000342992 | p.I370F  | c.1108A>T | Unverified | CAG | ATC | AGG | 1 | A | T |
| TCGA-61-1733 | TTN_ENST00 | ENST00000356127 | p.I370F  | c.1108A>T | Unverified | CAG | ATC | AGG | 1 | A | T |
| TCGA-61-1733 | TTN_ENST00 | ENST00000356127 | p.I370F  | c.1108A>T | Unverified | CAG | ATC | AGG | 1 | A | T |
| TCGA-61-1733 | TTN_ENST00 | ENST00000359218 | p.I370F  | c.1108A>T | Unverified | CAG | ATC | AGG | 1 | A | T |
| TCGA-61-1733 | TTN_ENST00 | ENST00000359218 | p.I370F  | c.1108A>T | Unverified | CAG | ATC | AGG | 1 | A | T |
| TCGA-61-1733 | TTN_ENST00 | ENST00000360870 | p.I370F  | c.1108A>T | Unverified | CAG | ATC | AGG | 1 | A | T |
| TCGA-61-1733 | TTN_ENST00 | ENST00000360870 | p.I370F  | c.1108A>T | Unverified | CAG | ATC | AGG | 1 | A | T |

|              |            |                 |          |            |            |     |     |     |   |   |   |
|--------------|------------|-----------------|----------|------------|------------|-----|-----|-----|---|---|---|
| TCGA-13-0886 | TUBB1      | ENST00000217133 | p.S168C  | c.502A>T   | Verified   | TTC | AGC | GTC | 1 | A | T |
| TCGA-36-1577 | TXNDC12    | ENST00000371626 | p.Q155L  | c.464A>T   | Verified   | GCT | CAG | GAA | 2 | A | T |
| TCGA-24-2262 | UBE3B      | ENST00000434735 | p.I833F  | c.2497A>T  | Verified   | tcc | atc | aag | 1 | A | T |
| TCGA-13-0905 | UBR5       | ENST00000520539 | p.D2493V | c.7478A>T  | Verified   | tta | gat | gat | 2 | A | T |
| TCGA-29-1777 | UGT2A3     | ENST00000251566 | p.T197S  | c.589A>T   | Unverified | ATG | ACA | GGA | 1 | A | T |
| TCGA-30-1857 | UNC13C     | ENST00000260323 | p.I2068F | c.6202A>T  | Unverified | GTG | ATT | GCT | 1 | A | T |
| TCGA-30-1857 | UNC13C_EN  | ENST00000260323 | p.I2068F | c.6202A>T  | Unverified | GTG | ATT | GCT | 1 | A | T |
| TCGA-13-0923 | USH2A      | ENST00000307340 | p.I399F  | c.1195A>T  | Verified   | AGG | ATT | CAA | 1 | A | T |
| TCGA-13-0905 | UTP20      | ENST00000261637 | p.H240L  | c.719A>T   | Verified   | TTT | CAC | TCC | 2 | A | T |
| TCGA-13-0792 | VIPR2      | ENST00000262178 | p.H28L   | c.83A>T    | Unverified | TTT | CAT | CTG | 2 | A | T |
| TCGA-61-1740 | VPS13A     | ENST00000360280 | p.E3131V | c.9392A>T  | Unverified | ATT | GAA | GCA | 2 | A | T |
| TCGA-13-1512 | VPS13C     | ENST00000261517 | p.R3464S | c.10392A>T | Verified   | GTG | AGA | AGC | 3 | A | T |
| TCGA-04-1338 | WDR88      | ENST00000355868 | p.S119C  | c.355A>T   | Verified   | CTC | AGT | GGC | 1 | A | T |
| TCGA-13-1510 | WDR88      | ENST00000355868 | p.R252W  | c.754A>T   | Unverified | GAC | AGG | TGC | 1 | A | T |
| TCGA-61-1906 | XDH        | ENST00000379416 | p.A812A  | c.2436A>T  | Unverified | ACG | GCA | GTG | 3 | A | T |
| TCGA-61-1906 | XDH        | ENST00000379416 | p.A812A  | c.2436A>T  | Unverified | ACG | GCA | GTG | 3 | A | T |
| TCGA-24-1103 | XIRP1      | ENST00000340369 | p.D1289V | c.3866A>T  | Verified   | AAG | GAC | CCC | 2 | A | T |
| TCGA-24-2024 | XIRP2      | ENST00000295237 | p.Q1158L | c.3473A>T  | Verified   | ATC | CAA | GGT | 2 | A | T |
| TCGA-29-1781 | XPO6       | ENST00000304658 | p.P268P  | c.804A>T   | Unverified | ACC | CCA | TCC | 3 | A | T |
| TCGA-29-1781 | XPO6_ENST  | ENST00000304658 | p.P268P  | c.804A>T   | Unverified | ACC | CCA | TCC | 3 | A | T |
| TCGA-25-2393 | ZC3H14     | ENST00000251038 | p.N57Y   | c.169A>T   | Verified   | GGG | AAC | AAC | 1 | A | T |
| TCGA-25-2401 | ZC3H7B     | ENST00000352645 | p.R166R  | c.498A>T   | Unverified | CTG | CGA | GTT | 3 | A | T |
| TCGA-25-1313 | ZFP1       | ENST00000393430 | p.T284S  | c.850A>T   | Verified   | CTC | ACC | ACA | 1 | A | T |
| TCGA-04-1347 | ZFP90      | ENST00000398253 | p.E271V  | c.812A>T   | Verified   | ACT | GAG | CAT | 2 | A | T |
| TCGA-23-1120 | ZNF148     | ENST00000360647 | p.D465V  | c.1394A>T  | Verified   | TAT | GAT | GAT | 2 | A | T |
| TCGA-29-1691 | ZNF233     | ENST00000391958 | p.M624L  | c.1870A>T  | Unverified | GGC | ATG | TGT | 1 | A | T |
| TCGA-24-1845 | ZNF236     | ENST00000253159 | p.Q359L  | c.1076A>T  | Unverified | ATC | CAG | CAG | 2 | A | T |
| TCGA-24-1845 | ZNF236_ENS | ENST00000543926 | p.Q359L  | c.1076A>T  | Unverified | ATC | CAG | CAG | 2 | A | T |
| TCGA-25-2392 | ZNF238     | ENST00000358704 | p.S399C  | c.1195A>T  | Verified   | CTG | AGC | ACG | 1 | A | T |
| TCGA-24-1846 | ZNF295     | ENST00000398499 | p.T895T  | c.2685A>T  | Unverified | AGC | ACA | GCC | 3 | A | T |
| TCGA-13-1510 | ZNF345     | ENST00000420450 | p.E255V  | c.764A>T   | Unverified | GGT | GAG | AAA | 2 | A | T |
| TCGA-13-0886 | ZNF513     | ENST00000323703 | p.S383C  | c.1147A>T  | Verified   | CAC | AGT | GGT | 1 | A | T |
| TCGA-13-0884 | ZNF608     | ENST00000306315 | p.D590V  | c.1769A>T  | Verified   | CCT | GAC | AGT | 2 | A | T |
| TCGA-25-2398 | ZNF611     | ENST00000319783 | p.S607S  | c.1821A>T  | Verified   | AGG | TCA | TCC | 3 | A | T |

|              |           |                 |          |           |            |     |     |     |   |   |   |
|--------------|-----------|-----------------|----------|-----------|------------|-----|-----|-----|---|---|---|
| TCGA-23-1122 | ZNF620    | ENST00000314529 | p.T55S   | c.163A>T  | Verified   | TTC | ACC | ACG | 1 | A | T |
| TCGA-61-1998 | ZNF644    | ENST00000370440 | p.T664T  | c.1992A>T | Verified   | CGA | ACA | TTT | 3 | A | T |
| TCGA-29-1702 | ZNF850    | ENST00000591344 | p.H1027L | c.3080A>T | Unverified | CAA | CAT | AAA | 2 | A | T |
| TCGA-13-0913 | ZSCAN1    | ENST00000282326 | p.A169A  | c.507A>T  | Verified   | CCA | GCA | CTC | 3 | A | T |
| TCGA-30-1857 | ZSWIM3    | ENST00000255152 | p.Q657L  | c.1970A>T | Unverified | TCC | CAG | CCA | 2 | A | T |
| TCGA-25-2401 | ABCA1     | ENST00000374736 | p.M433L  | c.1297A>T | Verified   | GAA | ATG | GAC | 1 | A | T |
| TCGA-23-2078 | ACCN2     | ENST00000228468 | p.S251C  | c.751A>T  | Verified   | CAT | AGT | CAG | 1 | A | T |
| TCGA-13-1501 | ACCSL     | ENST00000378832 | p.T393S  | c.1177A>T | Verified   | GGT | ACC | AGT | 1 | A | T |
| TCGA-13-1501 | ACCSL     | ENST00000378832 | p.T393S  | c.1177A>T | Verified   | GGT | ACC | AGT | 1 | A | T |
| TCGA-29-1761 | ACOX3     | ENST00000356406 | p.N258I  | c.773A>T  | Unverified | GAT | AAT | GGT | 2 | A | T |
| TCGA-30-1891 | ADAM10    | ENST00000260408 | p.K299M  | c.896A>T  | Unverified | gag | aag | ttt | 2 | A | T |
| TCGA-13-0792 | ADAMTS16_ | ENST00000274181 | p.K1209M | c.3626A>T | Verified   | CAC | AAG | TTC | 2 | A | T |
| TCGA-29-1768 | AGAP2     | ENST00000257897 | p.K501*  | c.1501A>T | Unverified | aaa | aaa | ttg | 1 | A | T |
| TCGA-29-1768 | AGAP2_ENS | ENST00000547588 | p.K837*  | c.2509A>T | Unverified | AAA | AAA | TTG | 1 | A | T |
| TCGA-13-0760 | ALB       | ENST00000295897 | p.Y174F  | c.521A>T  | Verified   | TTT | TAT | GCC | 2 | A | T |
| TCGA-24-2289 | ALS2CR12  | ENST00000286190 | p.N125I  | c.374A>T  | Unverified | ACC | AAC | ATC | 2 | A | T |
| TCGA-24-1849 | ANKRD12   | ENST00000262126 | p.K945N  | c.2835A>T | Unverified | AGT | AAA | TCA | 3 | A | T |
| TCGA-24-2280 | ANKRD35   | ENST00000355594 | p.K913I  | c.2738A>T | Verified   | CTG | AAA | GAG | 2 | A | T |
| TCGA-13-0714 | ANXA11    | ENST00000372234 | p.N41I   | c.122A>T  | Verified   | GAT | AAC | GTG | 2 | A | T |
| TCGA-29-1775 | AP1S2     | ENST00000329235 | p.K17I   | c.50A>T   | Unverified | caa | aaa | tgg | 2 | A | T |
| TCGA-09-2049 | AQP2      | ENST00000199280 | p.N184I  | c.551A>T  | Verified   | ATG | AAT | CCT | 2 | A | T |
| TCGA-04-1655 | ARAP2     | ENST00000303965 | p.K1224N | c.3672A>T | Unverified | AAA | AAA | TAT | 3 | A | T |
| TCGA-09-1665 | ARFGEF1   | ENST00000262215 | p.E294D  | c.882A>T  | Verified   | aat | gaa | cag | 3 | A | T |
| TCGA-09-2049 | ASB17     | ENST00000284142 | p.K6N    | c.18A>T   | Verified   | act | aaa | tta | 3 | A | T |
| TCGA-13-0792 | ATP11C    | ENST00000327569 | p.Y879F  | c.2636A>T | Verified   | CAG | TAC | TTC | 2 | A | T |
| TCGA-61-1906 | ATP13A5   | ENST00000342358 | p.M332L  | c.994A>T  | Unverified | ACT | ATG | CCT | 1 | A | T |
| TCGA-61-1906 | ATP13A5   | ENST00000342358 | p.M332L  | c.994A>T  | Unverified | ACT | ATG | CCT | 1 | A | T |
| TCGA-13-0760 | ATR       | NM_001184       | p.N2056I | c.6167A>T | Verified   | gac | aac | aaa | 2 | A | T |
| TCGA-09-2049 | ATRNL1    | ENST00000355044 | p.S724C  | c.2170A>T | Verified   | AAA | AGC | TGT | 1 | A | T |
| TCGA-23-2077 | BAZ1B     | ENST00000339594 | p.K216I  | c.647A>T  | Verified   | CCA | AAA | TTT | 2 | A | T |
| TCGA-61-2012 | BCL6      | ENST00000406870 | p.Y293F  | c.878A>T  | Verified   | ccc | tac | ttc | 2 | A | T |
| TCGA-61-2113 | BOD1L     | ENST00000040738 | p.Q1210H | c.3630A>T | Verified   | ATA | CAA | AGT | 3 | A | T |
| TCGA-30-1857 | BRCA1     | ENST00000357654 | p.K800*  | c.2398A>T | Unverified | aat | aaa | tgt | 1 | A | T |
| TCGA-13-0792 | BRCA2     | ENST00000380152 | p.E1143D | c.3429A>T | Verified   | TTT | GAA | GTG | 3 | A | T |

|              |             |                 |          |           |            |     |     |     |   |   |   |
|--------------|-------------|-----------------|----------|-----------|------------|-----|-----|-----|---|---|---|
| TCGA-13-0893 | C10orf113   | ENST00000377118 | p.Q72H   | c.216A>T  | Verified   | CTG | CAA | AGC | 3 | A | T |
| TCGA-13-0893 | C10orf113_f | ENST00000377118 | p.Q72H   | c.216A>T  | Verified   | CTG | CAA | AGC | 3 | A | T |
| TCGA-61-1906 | C10orf120   | ENST00000329446 | p.R238*  | c.712A>T  | Unverified | AAA | AGA | CGA | 1 | A | T |
| TCGA-61-1906 | C10orf120   | ENST00000329446 | p.R238*  | c.712A>T  | Unverified | AAA | AGA | CGA | 1 | A | T |
| TCGA-13-0792 | C11orf30    | ENST00000334736 | p.K222M  | c.665A>T  | Verified   | CCA | AAG | GCC | 2 | A | T |
| TCGA-09-2044 | C14orf118   | ENST00000261530 | p.K354N  | c.1062A>T | Verified   | AAT | AAA | GCG | 3 | A | T |
| TCGA-24-2280 | C14orf28    | ENST00000325192 | p.R24W   | c.70A>T   | Unverified | TGT | AGG | CCT | 1 | A | T |
| TCGA-24-1845 | C1orf146    | ENST00000370375 | p.K6I    | c.17A>T   | Unverified | GGA | AAA | GAA | 2 | A | T |
| TCGA-13-0916 | C5orf42     | ENST00000274258 | p.V88V   | c.264A>T  | Verified   | CCT | GTA | GCA | 3 | A | T |
| TCGA-24-2024 | C7orf58     | ENST00000310396 | p.I419I  | c.1257A>T | Verified   | TCC | ATA | TTT | 3 | A | T |
| TCGA-10-0930 | C8orf80     | ENST00000341513 | p.K652M  | c.1955A>T | Verified   | AGG | AAG | AGG | 2 | A | T |
| TCGA-10-0930 | C8orf80     | ENST00000341513 | p.K652M  | c.1955A>T | Verified   | AGG | AAG | AGG | 2 | A | T |
| TCGA-13-1498 | CACNA2D3    | ENST00000474759 | p.R897*  | c.2689A>T | Verified   | AAA | AGA | ATT | 1 | A | T |
| TCGA-29-1776 | CC2D2A      | ENST00000389652 | p.L302L  | c.906A>T  | Unverified | ATC | CTA | GCT | 3 | A | T |
| TCGA-29-1776 | CC2D2A_EN   | ENST00000424120 | p.L351L  | c.1053A>T | Unverified | ATC | CTA | GCT | 3 | A | T |
| TCGA-13-0923 | CCDC136     | ENST00000397697 | p.E851D  | c.2553A>T | Verified   | GAG | GAA | ATG | 3 | A | T |
| TCGA-29-1777 | CCDC164     | ENST00000288710 | p.M463L  | c.1387A>T | Unverified | CTT | ATG | CGC | 1 | A | T |
| TCGA-13-0906 | CCDC39      | ENST00000273654 | p.K515N  | c.1545A>T | Verified   | CTG | AAA | CAT | 3 | A | T |
| TCGA-13-1512 | CCDC69      | ENST00000355417 | p.E20D   | c.60A>T   | Verified   | CAA | GAA | CCA | 3 | A | T |
| TCGA-23-1124 | CD163       | ENST00000359156 | p.Q241H  | c.723A>T  | Verified   | CAT | CAA | GGA | 3 | A | T |
| TCGA-61-2113 | CD38        | ENST00000226279 | p.N183I  | c.548A>T  | Verified   | AAC | AAC | CCT | 2 | A | T |
| TCGA-13-0904 | CD97        | ENST00000242786 | p.K281I  | c.842A>T  | Verified   | GAC | AAA | GTC | 2 | A | T |
| TCGA-13-0885 | CDCP2       | ENST00000371330 | p.N267I  | c.800A>T  | Verified   | GGC | AAC | TTC | 2 | A | T |
| TCGA-13-0885 | CDH10       | ENST00000264463 | p.K53N   | c.159A>T  | Verified   | CAA | AAA | CGT | 3 | A | T |
| TCGA-04-1338 | CDH11       | ENST00000268603 | p.E646D  | c.1938A>T | Verified   | AAA | GAA | CCA | 3 | A | T |
| TCGA-23-1110 | CDH16       | ENST00000299752 | p.E281D  | c.843A>T  | Verified   | TTT | GAA | GTG | 3 | A | T |
| TCGA-10-0930 | CDH19       | ENST00000262150 | p.N508I  | c.1523A>T | Verified   | TTT | AAT | CTA | 2 | A | T |
| TCGA-10-0930 | CDH19       | ENST00000262150 | p.N508I  | c.1523A>T | Verified   | TTT | AAT | CTA | 2 | A | T |
| TCGA-61-1740 | CENPF       | ENST00000366955 | p.T729S  | c.2185A>T | Unverified | CTT | ACT | GGG | 1 | A | T |
| TCGA-25-1326 | CENPJ       | ENST00000381884 | p.N123Y  | c.367A>T  | Verified   | AAA | AAT | GAC | 1 | A | T |
| TCGA-24-1469 | CEP63       | ENST00000337090 | p.V167V  | c.501A>T  | Verified   | CAG | GTA | TCT | 3 | A | T |
| TCGA-61-1910 | CFH         | ENST00000367429 | p.K156I  | c.467A>T  | Unverified | gga | aaa | att | 2 | A | T |
| TCGA-29-1693 | CFHR4_ENS   | ENST00000367416 | p.Y176F  | c.527A>T  | Unverified | TGC | TAT | GAT | 2 | A | T |
| TCGA-04-1655 | CHD9        | NM_025134.3     | p.K1350* | c.4048A>T | Unverified | aaa | aag | gaa | 1 | A | T |

|              |            |                 |          |            |            |     |     |     |   |   |   |
|--------------|------------|-----------------|----------|------------|------------|-----|-----|-----|---|---|---|
| TCGA-13-0903 | CHL1       | ENST00000256509 | p.K1132M | c.3395A>T  | Verified   | GAA | AAG | GAA | 2 | A | T |
| TCGA-09-2049 | CHSY3      | ENST00000305031 | p.L851F  | c.2553A>T  | Verified   | TGC | TTA | GGA | 3 | A | T |
| TCGA-04-1347 | CLDN17     | ENST00000286808 | p.E48D   | c.144A>T   | Verified   | TGG | GAA | GGG | 3 | A | T |
| TCGA-29-1785 | CLLU1OS    | ENST00000378487 | p.T52S   | c.154A>T   | Unverified | CTA | ACA | AGT | 1 | A | T |
| TCGA-29-1785 | CLLU1OS    | ENST00000378487 | p.T52S   | c.154A>T   | Unverified | CTA | ACA | AGT | 1 | A | T |
| TCGA-30-1855 | CLNK       | ENST00000226951 | p.L187F  | c.561A>T   | Unverified | CCT | TTA | TCT | 3 | A | T |
| TCGA-30-1855 | CLNK_ENST0 | ENST00000226951 | p.L187F  | c.561A>T   | Unverified | CCT | TTA | TCT | 3 | A | T |
| TCGA-29-1781 | COL11A1    | ENST00000358392 | p.T1490S | c.4468A>T  | Unverified | GGA | ACT | CAA | 1 | A | T |
| TCGA-29-1781 | COL11A1_EI | ENST00000370096 | p.T1478S | c.4432A>T  | Unverified | GGA | ACT | CAA | 1 | A | T |
| TCGA-23-1122 | COL11A2    | ENST00000341947 | p.K962N  | c.2886A>T  | Unverified | GGA | AAA | GAA | 3 | A | T |
| TCGA-04-1638 | COL19A1    | ENST00000322773 | p.K560M  | c.1679A>T  | Unverified | GAA | AAG | GGA | 2 | A | T |
| TCGA-30-1855 | COL22A1    | ENST00000303045 | p.T1478S | c.4432A>T  | Unverified | GAA | ACC | AGA | 1 | A | T |
| TCGA-13-0924 | CPA6       | ENST00000297770 | p.K255I  | c.764A>T   | Verified   | AGA | AAA | ACA | 2 | A | T |
| TCGA-24-2288 | CRTAC1     | ENST00000370597 | p.N444I  | c.1331A>T  | Unverified | AAC | AAC | TGG | 2 | A | T |
| TCGA-13-0923 | CRY1       | ENST00000008527 | p.K228N  | c.684A>T   | Verified   | AGA | AAA | GCT | 3 | A | T |
| TCGA-24-1423 | CSF3R      | ENST00000373103 | p.E363D  | c.1089A>T  | Verified   | GAG | GAA | GAC | 3 | A | T |
| TCGA-23-1122 | CSMD1_ENS  | ENST00000318252 | p.R2921S | c.8763A>T  | Verified   | TGC | CAA | GCT | 3 | A | T |
| TCGA-20-1683 | CSMD1_ENS  | ENST00000537824 | p.Q3451H | c.10353A>T | Unverified | TTT | CAA | GGT | 3 | A | T |
| TCGA-24-2035 | CSMD3      | ENST00000297405 | p.R1885* | c.5653A>T  | Verified   | cca | aga | ttc | 1 | A | T |
| TCGA-61-1910 | CTAGE8     | ENST00000487179 | p.K317I  | c.950A>T   | Unverified | AAG | AAA | CTG | 2 | A | T |
| TCGA-25-2392 | CXCL9      | ENST00000264888 | p.K104N  | c.312A>T   | Verified   | aaa | aaa | cat | 3 | A | T |
| TCGA-23-1032 | DACH2      | ENST00000373125 | p.K526M  | c.1577A>T  | Verified   | acc | aag | aga | 2 | A | T |
| TCGA-23-1032 | DACH2_ENS  | ENST00000373131 | p.K513M  | c.1538A>T  | Verified   | ACC | AAG | AGA | 2 | A | T |
| TCGA-23-1022 | DEFB114    | ENST00000322066 | p.T22S   | c.64A>T    | Verified   | TGT | ACC | TTG | 1 | A | T |
| TCGA-13-0887 | DGKA       | ENST00000331886 | p.E700D  | c.2100A>T  | Verified   | gga | gaa | ccc | 3 | A | T |
| TCGA-24-1616 | DIAPH2     | ENST00000324765 | p.I333L  | c.997A>T   | Verified   | ttt | ata | aat | 1 | A | T |
| TCGA-23-1032 | DIAPH2     | ENST00000324765 | p.K946M  | c.2837A>T  | Verified   | gaa | aag | atg | 2 | A | T |
| TCGA-24-2280 | DNAH7      | ENST00000312428 | p.K3457I | c.10370A>T | Unverified | TCA | AAA | CTT | 2 | A | T |
| TCGA-04-1361 | DNAH8      | NM_001371.1     | p.K4454M | c.13361A>T | Verified   | tac | aag | aaa | 2 | A | T |
| TCGA-04-1361 | DNAH8      | NM_001371.1     | p.K4454M | c.13361A>T | Verified   | tac | aag | aaa | 2 | A | T |
| TCGA-04-1530 | DNAH8      | NM_001371.1     | p.N2531I | c.7592A>T  | Verified   | att | aat | gag | 2 | A | T |
| TCGA-13-0755 | DOCK8      | ENST00000432829 | p.K624*  | c.1870A>T  | Verified   | GAA | AAA | TTG | 1 | A | T |
| TCGA-13-0924 | DQX1       | ENST00000393951 | p.E450D  | c.1350A>T  | Verified   | CTA | GAA | CTC | 3 | A | T |
| TCGA-24-1469 | DSG2       | ENST00000261590 | p.K536N  | c.1608A>T  | Verified   | GAC | AAA | CCA | 3 | A | T |

|              |            |                 |          |            |            |     |     |     |   |   |   |
|--------------|------------|-----------------|----------|------------|------------|-----|-----|-----|---|---|---|
| TCGA-29-1761 | DSN1       | ENST00000373750 | p.K190I  | c.569A>T   | Unverified | CAA | AAA | TGT | 2 | A | T |
| TCGA-25-1318 | DST_ENST00 | ENST00000370769 | p.T4615S | c.13843A>T | Verified   | TTA | ACA | ATT | 1 | A | T |
| TCGA-25-1318 | DST_ENST00 | ENST00000370769 | p.T4615S | c.13843A>T | Verified   | TTA | ACA | ATT | 1 | A | T |
| TCGA-13-0755 | DUSP9      | ENST00000370167 | p.N326Y  | c.976A>T   | Verified   | tct | aac | atc | 1 | A | T |
| TCGA-24-0979 | DUSP9      | ENST00000370167 | p.N332I  | c.995A>T   | Verified   | ttc | aac | ttc | 2 | A | T |
| TCGA-29-1770 | E2F5       | ENST00000416274 | p.K237*  | c.709A>T   | Unverified | TCT | AAG | CCC | 1 | A | T |
| TCGA-29-1775 | EGLN1      | ENST00000366641 | p.K249M  | c.746A>T   | Unverified | tcc | aag | gac | 2 | A | T |
| TCGA-09-2050 | ELMO1      | ENST00000310758 | p.I121I  | c.363A>T   | Verified   | TTT | ATA | AAC | 3 | A | T |
| TCGA-04-1655 | EMCN       | ENST00000296420 | p.M215L  | c.643A>T   | Unverified | CGA | ATG | TGC | 1 | A | T |
| TCGA-61-2102 | ENSG000000 | ENST00000301831 | p.K34*   | c.100A>T   | Verified   | ATT | AAA | TCT | 1 | A | T |
| TCGA-24-1850 | ENSG000000 | ENST00000325845 | p.K143*  | c.427A>T   | Unverified | GGA | AAG | AGG | 1 | A | T |
| TCGA-13-1501 | ERMAP      | ENST00000372514 | p.Y298F  | c.893A>T   | Verified   | GTG | TAT | GTG | 2 | A | T |
| TCGA-13-1501 | ERMAP      | ENST00000372514 | p.Y298F  | c.893A>T   | Verified   | GTG | TAT | GTG | 2 | A | T |
| TCGA-61-2113 | ETV5       | ENST00000306376 | p.L46L   | c.138A>T   | Verified   | GAG | CTA | TTT | 3 | A | T |
| TCGA-13-0920 | F5         | ENST00000367797 | p.I2196F | c.6586A>T  | Verified   | CCA | ATC | ATT | 1 | A | T |
| TCGA-29-1763 | FABP12     | ENST00000360464 | p.K10M   | c.29A>T    | Unverified | TGG | AAG | TCC | 2 | A | T |
| TCGA-29-1763 | FABP12_ENS | ENST00000360464 | p.K10M   | c.29A>T    | Unverified | TGG | AAG | TCC | 2 | A | T |
| TCGA-25-2392 | FAM105B    | ENST00000284274 | p.K233N  | c.699A>T   | Verified   | GTA | AAA | TTT | 3 | A | T |
| TCGA-24-2289 | FAM161A    | ENST00000307507 | p.L283F  | c.849A>T   | Unverified | CAT | TTA | CAG | 3 | A | T |
| TCGA-29-1761 | FAM161A    | ENST00000307507 | p.V129V  | c.387A>T   | Unverified | ACA | GTA | CCG | 3 | A | T |
| TCGA-29-1761 | FAM161A_E  | ENST00000404929 | p.V238V  | c.714A>T   | Unverified | ACA | GTA | CCG | 3 | A | T |
| TCGA-29-1761 | FAM161A_E  | ENST00000405894 | p.V238V  | c.714A>T   | Unverified | ACA | GTA | CCG | 3 | A | T |
| TCGA-25-1326 | FAM194A    | ENST00000295910 | p.K624*  | c.1870A>T  | Verified   | GAA | AAA | TTA | 1 | A | T |
| TCGA-29-1763 | FAM60A     | ENST00000337682 | p.S105C  | c.313A>T   | Unverified | AAA | AGC | AAC | 1 | A | T |
| TCGA-09-2056 | FAM71A     | ENST00000294829 | p.K106M  | c.317A>T   | Verified   | ACC | AAG | AGA | 2 | A | T |
| TCGA-13-1510 | FAT2       | ENST00000261800 | p.V3024V | c.9072A>T  | Unverified | GAT | GTA | TTT | 3 | A | T |
| TCGA-13-0890 | FBXO18     | ENST00000379999 | p.I629F  | c.1885A>T  | Verified   | cct | att | tgg | 1 | A | T |
| TCGA-04-1331 | FBXO28     | ENST00000366862 | p.N133Y  | c.397A>T   | Verified   | aga | aac | cat | 1 | A | T |
| TCGA-61-1998 | FLJ25006   | ENST00000301037 | p.K130N  | c.390A>T   | Verified   | CAG | AAA | GCT | 3 | A | T |
| TCGA-10-0930 | FRAS1_ENST | ENST00000325942 | p.Y1040F | c.3119A>T  | Verified   | GGG | TAC | TTT | 2 | A | T |
| TCGA-10-0930 | FRAS1_ENST | ENST00000325942 | p.Y1040F | c.3119A>T  | Verified   | GGG | TAC | TTT | 2 | A | T |
| TCGA-23-1110 | FSTL5      | ENST00000306100 | p.K533N  | c.1599A>T  | Verified   | CAA | AAA | GTT | 3 | A | T |
| TCGA-23-2078 | GAD1       | ENST00000358196 | p.Q115H  | c.345A>T   | Verified   | GTG | CAA | TTC | 3 | A | T |
| TCGA-24-1103 | GALNT2     | ENST00000366672 | p.K323M  | c.968A>T   | Verified   | GGG | AAG | TAC | 2 | A | T |

|              |            |                     |          |            |            |     |     |     |   |   |   |
|--------------|------------|---------------------|----------|------------|------------|-----|-----|-----|---|---|---|
| TCGA-23-1114 | GATA3      | ENST00000379328     | p.N393I  | c.1178A>T  | Unverified | ttt | aac | ccg | 2 | A | T |
| TCGA-25-2391 | GFRA1      | ENST00000369236     | p.N276I  | c.827A>T   | Unverified | GAA | AAC | TAC | 2 | A | T |
| TCGA-24-1422 | GGNBP2     | ENST00000304718     | p.K134M  | c.401A>T   | Verified   | AAG | AAG | CTT | 2 | A | T |
| TCGA-29-1691 | GNPAT      | ENST00000366647     | p.K304I  | c.911A>T   | Unverified | CCA | AAA | GAG | 2 | A | T |
| TCGA-04-1361 | GNPDA2     | ENST00000295448     | p.K126*  | c.376A>T   | Verified   | ATA | AAA | GAA | 1 | A | T |
| TCGA-04-1361 | GNPDA2     | ENST00000295448     | p.K126*  | c.376A>T   | Verified   | ATA | AAA | GAA | 1 | A | T |
| TCGA-29-1769 | GOLGB1     | ENST00000340645     | p.K1741M | c.5222A>T  | Unverified | AAG | AAG | TTT | 2 | A | T |
| TCGA-13-0760 | GOLGB1     | ENST00000340645     | p.E1265D | c.3795A>T  | Verified   | GAA | GAA | CCT | 3 | A | T |
| TCGA-24-2290 | GREB1_ENS  | ENST00000381486     | p.N1084I | c.3251A>T  | Verified   | AGG | AAC | GAG | 2 | A | T |
| TCGA-24-2290 | GREB1_ENS  | ENST00000381486     | p.N1084I | c.3251A>T  | Verified   | AGG | AAC | GAG | 2 | A | T |
| TCGA-30-1891 | GRK6       | ENST00000355472     | p.N22Y   | c.64A>T    | Unverified | GGA | AAT | CGC | 1 | A | T |
| TCGA-61-1738 | GRLF1      | ENST00000317082     | p.K368*  | c.1102A>T  | Unverified | AAA | AAG | CTC | 1 | A | T |
| TCGA-61-1738 | GRLF1      | ENST00000317082     | p.K368*  | c.1102A>T  | Unverified | AAA | AAG | CTC | 1 | A | T |
| TCGA-61-1738 | GRLF1_ENS  | ENST00000317082_v61 | p.K368*  | c.1102A>T  | Unverified | AAA | AAG | CTC | 1 | A | T |
| TCGA-61-1738 | GRLF1_ENS  | ENST00000317082_v61 | p.K368*  | c.1102A>T  | Unverified | AAA | AAG | CTC | 1 | A | T |
| TCGA-13-0762 | GSPT2      | ENST00000340438     | p.Q578H  | c.1734A>T  | Unverified | aaa | caa | gat | 3 | A | T |
| TCGA-13-0762 | GSPT2      | ENST00000340438     | p.Q578H  | c.1734A>T  | Unverified | aaa | caa | gat | 3 | A | T |
| TCGA-24-2267 | GSTA2      | ENST00000493422     | p.I35L   | c.103A>T   | Verified   | TTT | ATA | AAA | 1 | A | T |
| TCGA-29-1702 | HAUS2      | ENST00000260372     | p.K165N  | c.495A>T   | Unverified | AAG | AAA | ATG | 3 | A | T |
| TCGA-30-1855 | HEATR1     | ENST00000366582     | p.K1656N | c.4968A>T  | Unverified | AAG | AAA | AAG | 3 | A | T |
| TCGA-24-1844 | HEATR5A    | ENST00000389961     | p.M1033L | c.3097A>T  | Unverified | GTA | ATG | CAA | 1 | A | T |
| TCGA-24-1844 | HEATR5A_EI | ENST00000389961_v65 | p.M1033L | c.3097A>T  | Unverified | GTA | ATG | CAA | 1 | A | T |
| TCGA-61-1910 | HIAT1      | ENST00000370152     | p.T252S  | c.754A>T   | Unverified | ATT | ACA | GTG | 1 | A | T |
| TCGA-13-0900 | HMCN1      | ENST00000271588     | p.T3598S | c.10792A>T | Verified   | TAT | ACA | TGT | 1 | A | T |
| TCGA-09-2056 | HPSE2      | ENST00000370552     | p.K160I  | c.479A>T   | Verified   | GAT | AAA | CAG | 2 | A | T |
| TCGA-13-0890 | HRH4       | ENST00000256906     | p.Y358F  | c.1073A>T  | Verified   | TTG | TAT | CCA | 2 | A | T |
| TCGA-23-2078 | HSPA5      | ENST00000324460     | p.I426F  | c.1276A>T  | Verified   | ggt | att | gaa | 1 | A | T |
| TCGA-61-1738 | HSPA5      | ENST00000324460     | p.E614D  | c.1842A>T  | Unverified | att | gaa | gac | 3 | A | T |
| TCGA-61-1738 | HSPA5      | ENST00000324460     | p.E614D  | c.1842A>T  | Unverified | att | gaa | gac | 3 | A | T |
| TCGA-61-1907 | HUWE1      | XM_497119.1         | p.Y3996F | c.11987A>T | Unverified | agc | tac | ttc | 2 | A | T |
| TCGA-61-1907 | HUWE1_ENS  | ENST00000342160     | p.Y4106F | c.12317A>T | Unverified | AGC | TAC | TTC | 2 | A | T |
| TCGA-30-1718 | IDH3A      | ENST00000299518     | p.K90*   | c.268A>T   | Unverified | gat | aag | aac | 1 | A | T |
| TCGA-24-1846 | IL33       | ENST00000381434     | p.N171Y  | c.511A>T   | Unverified | TCA | AAT | GAA | 1 | A | T |
| TCGA-24-1469 | IL6ST      | ENST00000381298     | p.I253I  | c.759A>T   | Verified   | gtt | ata | ata | 3 | A | T |



|              |            |                 |          |            |            |     |     |     |   |   |   |
|--------------|------------|-----------------|----------|------------|------------|-----|-----|-----|---|---|---|
| TCGA-13-0883 | INSR_ENST0 | ENST00000302850 | p.K1047M | c.3140A>T  | Verified   | ATC | AAG | GGT | 2 | A | T |
| TCGA-61-2009 | IQCC       | ENST00000291358 | p.Y33F   | c.98A>T    | Verified   | GAG | TAT | GAG | 2 | A | T |
| TCGA-61-2008 | IRX6       | ENST00000290552 | p.K176M  | c.527A>T   | Verified   | ACT | AAG | GGT | 2 | A | T |
| TCGA-09-2049 | ITGA4      | ENST00000397033 | p.K363N  | c.1089A>T  | Verified   | GAC | AAA | TAT | 3 | A | T |
| TCGA-23-1122 | ITIH1      | ENST00000273283 | p.T220S  | c.658A>T   | Verified   | CAA | ACT | ATC | 1 | A | T |
| TCGA-61-1910 | KCNA6      | ENST00000280684 | p.Y307F  | c.920A>T   | Unverified | CCC | TAC | TTC | 2 | A | T |
| TCGA-13-0761 | KCNJ15     | ENST00000398930 | p.Y355F  | c.1064A>T  | Verified   | AAG | TAC | AGG | 2 | A | T |
| TCGA-13-0761 | KCNJ15     | ENST00000398930 | p.Y355F  | c.1064A>T  | Verified   | AAG | TAC | AGG | 2 | A | T |
| TCGA-13-0885 | KCNQ5      | ENST00000370398 | p.K664N  | c.1992A>T  | Verified   | AGC | AAA | GAT | 3 | A | T |
| TCGA-29-1770 | KIAA1324L  | ENST00000297222 | p.K669*  | c.2005A>T  | Unverified | ATT | AAA | GGA | 1 | A | T |
| TCGA-29-1770 | KIAA1324L_ | ENST00000450689 | p.K909*  | c.2725A>T  | Unverified | ATT | AAA | GGA | 1 | A | T |
| TCGA-29-1777 | KIF26B     | ENST00000407071 | p.K195M  | c.584A>T   | Unverified | TTG | AAG | CAG | 2 | A | T |
| TCGA-29-1777 | KIF26B_ENS | ENST00000407071 | p.K195M  | c.584A>T   | Unverified | TTG | AAG | CAG | 2 | A | T |
| TCGA-13-0903 | LIPI       | ENST00000344577 | p.R335W  | c.1003A>T  | Verified   | GAA | AGG | ATG | 1 | A | T |
| TCGA-61-1910 | LPCAT1     | ENST00000283415 | p.K185N  | c.555A>T   | Unverified | AGG | AAA | ACA | 3 | A | T |
| TCGA-13-0807 | LRCH2_ENST | ENST00000317135 | p.K743N  | c.2229A>T  | Verified   | GTG | AAA | GTT | 3 | A | T |
| TCGA-13-1510 | LRMP       | ENST00000354454 | p.N309I  | c.926A>T   | Unverified | cta | aac | tcc | 2 | A | T |
| TCGA-09-0369 | LRP2       | ENST00000263816 | p.N682I  | c.2045A>T  | Verified   | GAT | AAT | GAT | 2 | A | T |
| TCGA-09-0369 | LRP2       | ENST00000263816 | p.N682I  | c.2045A>T  | Verified   | GAT | AAT | GAT | 2 | A | T |
| TCGA-29-1761 | LRP2BP     | ENST00000328559 | p.N24I   | c.71A>T    | Unverified | AAA | AAC | CAA | 2 | A | T |
| TCGA-23-1124 | LRRC1      | ENST00000370888 | p.N115I  | c.344A>T   | Verified   | GGA | AAC | CCA | 2 | A | T |
| TCGA-24-1844 | LRRC41     | ENST00000343304 | p.?      | c.358-2A>T | Unverified | GAA | AGT | GTG | 1 | A | T |
| TCGA-13-1498 | LRRIQ3     | ENST00000395089 | p.S549C  | c.1645A>T  | Verified   | AAA | AGC | CTG | 1 | A | T |
| TCGA-13-0885 | MAGEA1     | ENST00000356661 | p.K278I  | c.833A>T   | Verified   | GTG | AAA | GTC | 2 | A | T |
| TCGA-13-0760 | MAGED1     | ENST00000375695 | p.K131*  | c.391A>T   | Verified   | cct | aag | tca | 1 | A | T |
| TCGA-23-1022 | MANEA      | ENST00000358812 | p.N58I   | c.173A>T   | Verified   | AAA | AAT | TTT | 2 | A | T |
| TCGA-29-1693 | MAP1B      | ENST00000296755 | p.E1304D | c.3912A>T  | Unverified | CAA | GAA | GTA | 3 | A | T |
| TCGA-25-1313 | MAP2K2_EN  | ENST00000262948 | p.K39M   | c.116A>T   | Unverified | CAG | AAG | AAG | 2 | A | T |
| TCGA-61-2009 | MASP2      | ENST00000400897 | p.S546C  | c.1636A>T  | Verified   | AAT | AGC | AAC | 1 | A | T |
| TCGA-13-1497 | MCART1     | ENST00000377716 | p.N187I  | c.560A>T   | Verified   | AGC | AAT | GTC | 2 | A | T |
| TCGA-24-2024 | MCC        | ENST00000302475 | p.K29M   | c.86A>T    | Verified   | CTA | AAG | GGA | 2 | A | T |
| TCGA-24-2024 | MCC_ENST0  | ENST00000408903 | p.K219M  | c.656A>T   | Verified   | CTA | AAG | GGA | 2 | A | T |
| TCGA-13-0885 | MCMBP      | ENST00000360003 | p.N25I   | c.74A>T    | Verified   | GTT | AAT | CCT | 2 | A | T |
| TCGA-20-1683 | MCTS1      | ENST00000371317 | p.L170F  | c.510A>T   | Unverified | tat | tta | aat | 3 | A | T |

|              |            |                 |          |            |            |     |     |     |   |   |   |
|--------------|------------|-----------------|----------|------------|------------|-----|-----|-----|---|---|---|
| TCGA-20-1683 | MCTS1_ENS  | ENST00000371315 | p.L171F  | c.513A>T   | Unverified | TAT | TTA | AAT | 3 | A | T |
| TCGA-24-1474 | MET        | ENST00000318493 | p.L238F  | c.714A>T   | Verified   | GTT | TTA | CCT | 3 | A | T |
| TCGA-13-0760 | MIF        | ENST00000215754 | p.N98I   | c.293A>T   | Unverified | ATC | AAC | TAT | 2 | A | T |
| TCGA-29-1691 | MLL3       | ENST00000262189 | p.I3488L | c.10462A>T | Unverified | AAT | ATA | CAA | 1 | A | T |
| TCGA-29-1691 | MLL3_ENST  | ENST00000355193 | p.I3488L | c.10462A>T | Unverified | AAT | ATA | CAA | 1 | A | T |
| TCGA-13-1501 | MORC4      | NM_024657.2     | p.T227S  | c.679A>T   | Verified   | aaa | aca | tct | 1 | A | T |
| TCGA-13-1501 | MORC4      | NM_024657.2     | p.T227S  | c.679A>T   | Verified   | aaa | aca | tct | 1 | A | T |
| TCGA-30-1718 | MPDZ       | NM_003829.1     | p.I126F  | c.376A>T   | Unverified | ctt | atc | aaa | 1 | A | T |
| TCGA-30-1718 | MPDZ_ENST  | ENST00000541718 | p.I126F  | c.376A>T   | Unverified | CTT | ATC | AAA | 1 | A | T |
| TCGA-24-2280 | MTERFD1    | ENST00000287025 | p.N326I  | c.977A>T   | Unverified | GCA | AAT | AAA | 2 | A | T |
| TCGA-23-1022 | MUC17      | ENST00000306151 | p.T3099S | c.9295A>T  | Verified   | TCA | ACT | TAT | 1 | A | T |
| TCGA-13-0887 | MUM1L1     | NM_152423.2     | p.S412C  | c.1234A>T  | Verified   | aaa | agt | atc | 1 | A | T |
| TCGA-23-1120 | MYH15      | ENST00000273353 | p.K1569M | c.4706A>T  | Verified   | AGC | AAG | ATT | 2 | A | T |
| TCGA-29-1781 | MYO18B     | ENST00000335473 | p.K2216M | c.6647A>T  | Unverified | AGA | AAG | TCC | 2 | A | T |
| TCGA-25-1326 | NAV3       | NM_014903.3     | p.T1360S | c.4078A>T  | Verified   | gat | act | ccg | 1 | A | T |
| TCGA-13-0714 | NCK2       | ENST00000233154 | p.I6F    | c.16A>T    | Verified   | GTT | ATT | GTG | 1 | A | T |
| TCGA-61-1895 | NDST4      | ENST00000264363 | p.N321I  | c.962A>T   | Unverified | ATG | AAT | GTC | 2 | A | T |
| TCGA-29-1761 | NEGR1      | ENST00000357731 | p.K259I  | c.776A>T   | Unverified | TAC | AAA | GGA | 2 | A | T |
| TCGA-29-1784 | NEURL      | ENST00000369780 | p.K109M  | c.326A>T   | Unverified | CTG | AAG | ATC | 2 | A | T |
| TCGA-29-1775 | NIPBL      | ENST00000282516 | p.K1187* | c.3559A>T  | Unverified | cca | aaa | cta | 1 | A | T |
| TCGA-29-1775 | NIPBL_ENST | ENST00000448238 | p.K1187* | c.3559A>T  | Unverified | CCA | AAA | CTA | 1 | A | T |
| TCGA-13-1481 | NKIRAS2    | ENST00000307641 | p.K101M  | c.302A>T   | Verified   | ctc | aag | aag | 2 | A | T |
| TCGA-23-1022 | NLRP13     | ENST00000342929 | p.E404D  | c.1212A>T  | Verified   | AGT | GAA | GTT | 3 | A | T |
| TCGA-61-2008 | NNT        | ENST00000264663 | p.E725D  | c.2175A>T  | Verified   | ATA | GAA | TAT | 3 | A | T |
| TCGA-13-1489 | NOTCH4     | ENST00000375023 | p.Q975H  | c.2925A>T  | Verified   | tcc | caa | ccc | 3 | A | T |
| TCGA-23-1031 | NPHP3      | ENST00000337331 | p.K319M  | c.956A>T   | Verified   | CTT | AAG | GAC | 2 | A | T |
| TCGA-13-0900 | NPR3       | ENST00000265074 | p.L492F  | c.1476A>T  | Verified   | GCT | TTA | CTA | 3 | A | T |
| TCGA-29-1703 | NRG2       | ENST00000361474 | p.K286N  | c.858A>T   | Unverified | ATC | AAA | TAT | 3 | A | T |
| TCGA-29-1703 | NRG2_ENST  | ENST00000544729 | p.K194N  | c.582A>T   | Unverified | ATC | AAA | TAT | 3 | A | T |
| TCGA-61-2095 | NUP205     | ENST00000285968 | p.T1176S | c.3526A>T  | Unverified | GCT | ACA | AAA | 1 | A | T |
| TCGA-24-2267 | ODZ1       | ENST00000371130 | p.T671S  | c.2011A>T  | Verified   | GGA | ACT | TTT | 1 | A | T |
| TCGA-13-0916 | ODZ4       | ENST00000278550 | p.N1835I | c.5504A>T  | Verified   | CAC | AAC | CGA | 2 | A | T |
| TCGA-25-2393 | OR2G6      | ENST00000343414 | p.I256I  | c.768A>T   | Verified   | ATC | ATA | TTC | 3 | A | T |
| TCGA-24-1850 | OR2T2      | ENST00000342927 | p.K304N  | c.912A>T   | Unverified | AGG | AAA | GTA | 3 | A | T |

|              |            |                 |          |            |            |     |     |     |   |   |   |
|--------------|------------|-----------------|----------|------------|------------|-----|-----|-----|---|---|---|
| TCGA-23-1022 | OR4N2      | ENST00000315947 | p.N303I  | c.908A>T   | Verified   | TTT | AAT | AAG | 2 | A | T |
| TCGA-24-2289 | OR4S2      | ENST00000312422 | p.K23N   | c.69A>T    | Unverified | GAG | AAA | GTT | 3 | A | T |
| TCGA-23-1110 | OR5AN1     | ENST00000313940 | p.I104F  | c.310A>T   | Verified   | TTT | ATC | TTT | 1 | A | T |
| TCGA-24-1422 | OR5H1      | ENST00000354565 | p.N286I  | c.857A>T   | Verified   | TTA | AAT | CCT | 2 | A | T |
| TCGA-29-1696 | OR5M1_EN   | ENST00000526538 | p.E11D   | c.33A>T    | Unverified | ACA | GAA | TTC | 3 | A | T |
| TCGA-29-1696 | OR5M1_EN   | ENST00000526538 | p.E11D   | c.33A>T    | Unverified | ACA | GAA | TTC | 3 | A | T |
| TCGA-23-1809 | OR8B3      | ENST00000354597 | p.N195I  | c.584A>T   | Unverified | GTC | AAC | GAG | 2 | A | T |
| TCGA-24-1616 | ORC4       | ENST00000264169 | p.I66F   | c.196A>T   | Verified   | att | atc | gga | 1 | A | T |
| TCGA-24-1469 | OTC        | ENST00000039007 | p.L9F    | c.27A>T    | Verified   | CTG | TTA | AAC | 3 | A | T |
| TCGA-13-1499 | PADI3      | ENST00000375460 | p.K382N  | c.1146A>T  | Unverified | TAC | AAA | AGA | 3 | A | T |
| TCGA-24-1470 | PCLO       | ENST00000333891 | p.Q3737H | c.11211A>T | Verified   | ACT | CAA | TCC | 3 | A | T |
| TCGA-61-1740 | PCSK9      | ENST00000302118 | p.T162S  | c.484A>T   | Unverified | ATT | ACC | CCT | 1 | A | T |
| TCGA-30-1857 | PEX11A     | ENST00000300056 | p.K57N   | c.171A>T   | Unverified | CGT | AAA | TGG | 3 | A | T |
| TCGA-61-1914 | PICALM     | ENST00000447890 | p.Q616H  | c.1848A>T  | Unverified | CCA | CAA | ATG | 3 | A | T |
| TCGA-29-1777 | PIK3C2G    | ENST00000433979 | p.Y516F  | c.1547A>T  | Unverified | TCC | TAT | CTA | 2 | A | T |
| TCGA-29-1777 | PIK3C2G_EN | ENST00000433979 | p.Y516F  | c.1547A>T  | Unverified | TCC | TAT | CTA | 2 | A | T |
| TCGA-24-0979 | PIKFYVE    | ENST00000264380 | p.K1446* | c.4336A>T  | Verified   | GAA | AAA | ATG | 1 | A | T |
| TCGA-23-1114 | PLAC1      | ENST00000359237 | p.Y94F   | c.281A>T   | Unverified | atc | tac | agc | 2 | A | T |
| TCGA-61-1900 | PLG        | ENST00000308192 | p.K528*  | c.1582A>T  | Unverified | GAA | AAA | AAT | 1 | A | T |
| TCGA-23-1118 | PNLIPRP3   | ENST00000369230 | p.S415C  | c.1243A>T  | Verified   | ACA | AGT | GTT | 1 | A | T |
| TCGA-04-1361 | POLQ       | NM_006596.3     | p.I1594I | c.4782A>T  | Verified   | gtt | ata | ctt | 3 | A | T |
| TCGA-04-1361 | POLQ       | NM_006596.3     | p.I1594I | c.4782A>T  | Verified   | gtt | ata | ctt | 3 | A | T |
| TCGA-13-0887 | POLR2B     | ENST00000381227 | p.T761S  | c.2281A>T  | Verified   | ACT | ACA | CGG | 1 | A | T |
| TCGA-29-1775 | PPAT       | ENST00000264220 | p.S145C  | c.433A>T   | Unverified | ACA | AGT | TCT | 1 | A | T |
| TCGA-29-1691 | PPFIA2     | ENST00000549396 | p.R877*  | c.2629A>T  | Unverified | cga | aga | cta | 1 | A | T |
| TCGA-13-1496 | PPP1R12B   | NM_032105.1     | p.M775L  | c.2323A>T  | Verified   | gaa | atg | gac | 1 | A | T |
| TCGA-24-1469 | PPP1R3A    | NM_002711.2     | p.L156F  | c.468A>T   | Verified   | aag | tta | gta | 3 | A | T |
| TCGA-29-1770 | PPP4R4     | ENST00000304338 | p.K509I  | c.1526A>T  | Unverified | CAG | AAA | TAT | 2 | A | T |
| TCGA-24-1431 | PRB4       | ENST00000279575 | p.N212I  | c.635A>T   | Verified   | GGC | AAT | CCC | 2 | A | T |
| TCGA-29-1761 | PRDM11     | ENST00000263765 | p.K407M  | c.1220A>T  | Unverified | TCC | AAG | GAG | 2 | A | T |
| TCGA-29-1761 | PRDM9      | ENST00000296682 | p.T160S  | c.478A>T   | Unverified | AGT | ACC | TCT | 1 | A | T |
| TCGA-23-1122 | PRIC285    | ENST00000467148 | p.K2441M | c.7322A>T  | Unverified | TAC | AAG | AGC | 2 | A | T |
| TCGA-13-0762 | PRICKLE2   | ENST00000295902 | p.N389I  | c.1166A>T  | Verified   | CTC | AAC | CGG | 2 | A | T |
| TCGA-13-0762 | PRICKLE2   | ENST00000295902 | p.N389I  | c.1166A>T  | Verified   | CTC | AAC | CGG | 2 | A | T |

|              |            |                     |          |           |            |     |     |     |   |   |   |
|--------------|------------|---------------------|----------|-----------|------------|-----|-----|-----|---|---|---|
| TCGA-04-1361 | PRPH2      | ENST00000230381     | p.Q18H   | c.54A>T   | Verified   | GCC | CAA | GGG | 3 | A | T |
| TCGA-04-1361 | PRPH2      | ENST00000230381     | p.Q18H   | c.54A>T   | Verified   | GCC | CAA | GGG | 3 | A | T |
| TCGA-29-1698 | PRSS58     | ENST00000547058     | p.K226I  | c.677A>T  | Unverified | GCC | AAA | ATT | 2 | A | T |
| TCGA-30-1718 | PSG8       | ENST00000306511     | p.E348D  | c.1044A>T | Unverified | GGA | GAA | GTC | 3 | A | T |
| TCGA-24-1422 | PTPRZ1     | ENST00000393386     | p.N468I  | c.1403A>T | Unverified | TAC | AAT | CGC | 2 | A | T |
| TCGA-24-1422 | PTPRZ1_EN5 | ENST00000393386     | p.N468I  | c.1403A>T | Unverified | TAC | AAT | CGC | 2 | A | T |
| TCGA-61-1895 | Q8N8K0_HL  | ENST00000301807     | p.Y1244F | c.3731A>T | Unverified | GCC | TAT | TTC | 2 | A | T |
| TCGA-61-1725 | RAD17_EN5  | ENST00000361732     | p.I246L  | c.736A>T  | Unverified | TTT | ATA | ATC | 1 | A | T |
| TCGA-13-0887 | RALGAPA2   | ENST00000202677     | p.K667N  | c.2001A>T | Verified   | GAT | AAA | TTA | 3 | A | T |
| TCGA-24-2289 | RASGRF2    | ENST00000265080     | p.Y1106F | c.3317A>T | Unverified | atc | tac | agg | 2 | A | T |
| TCGA-13-1507 | RBM7       | ENST00000540163     | p.Q167H  | c.501A>T  | Verified   | GAT | CAA | TCA | 3 | A | T |
| TCGA-24-1845 | RHEB       | ENST00000262187     | p.E53D   | c.159A>T  | Unverified | caa | gaa | tat | 3 | A | T |
| TCGA-29-1761 | RIF1       | ENST00000444746     | p.N2083Y | c.6247A>T | Unverified | gct | aat | aaa | 1 | A | T |
| TCGA-13-0887 | RIMS1      | ENST00000521978     | p.R1113W | c.3337A>T | Verified   | GCT | AGG | AGT | 1 | A | T |
| TCGA-13-0887 | RNASE11    | ENST00000398008     | p.S173C  | c.517A>T  | Verified   | CAT | AGT | GTT | 1 | A | T |
| TCGA-23-1117 | RNASEL     | ENST00000367559     | p.T222S  | c.664A>T  | Verified   | ATT | ACG | CAT | 1 | A | T |
| TCGA-23-1117 | RNASEL     | ENST00000367559     | p.T222S  | c.664A>T  | Verified   | ATT | ACG | CAT | 1 | A | T |
| TCGA-23-1022 | RNF111     | ENST00000348370     | p.K915I  | c.2744A>T | Verified   | AGG | AAA | CTG | 2 | A | T |
| TCGA-24-1850 | RP11-419C5 | ENST00000532298     | p.K175*  | c.523A>T  | Unverified | GGA | AAG | AGG | 1 | A | T |
| TCGA-24-1850 | RP11-419C5 | ENST00000532298_v68 | p.K175*  | c.523A>T  | Unverified | GGA | AAG | AGG | 1 | A | T |
| TCGA-24-1844 | RPGRIP1_EN | ENST00000400017     | p.R73W   | c.217A>T  | Unverified | AAA | AGG | CTG | 1 | A | T |
| TCGA-23-1114 | RPUSD4     | ENST00000298317     | p.N366I  | c.1097A>T | Unverified | CAA | AAT | GAG | 2 | A | T |
| TCGA-13-0792 | SCAF11     | ENST00000369367     | p.Q101H  | c.303A>T  | Verified   | GTT | CAA | GTA | 3 | A | T |
| TCGA-25-2391 | SCAND3     | ENST00000452236     | p.K772I  | c.2315A>T | Unverified | ATG | AAA | CCA | 2 | A | T |
| TCGA-23-1022 | SCLY       | ENST00000254663     | p.Y269F  | c.806A>T  | Verified   | TTT | TAT | GGT | 2 | A | T |
| TCGA-23-1120 | SCN11A     | ENST00000302328     | p.M1508L | c.4522A>T | Unverified | ATT | ATG | TTT | 1 | A | T |
| TCGA-29-1784 | SCN4A      | ENST00000435607     | p.K1329M | c.3986A>T | Unverified | TCC | AAG | AAG | 2 | A | T |
| TCGA-24-0979 | SCN8A      | ENST00000354534     | p.T1888S | c.5662A>T | Verified   | ACA | ACC | ACA | 1 | A | T |
| TCGA-04-1362 | SCN9A      | ENST00000409672     | p.T465S  | c.1393A>T | Verified   | GAA | ACA | TCC | 1 | A | T |
| TCGA-09-0369 | SCN9A      | ENST00000409672     | p.N1109Y | c.3325A>T | Verified   | TTA | AAC | CGG | 1 | A | T |
| TCGA-09-0369 | SCN9A      | ENST00000409672     | p.N1109Y | c.3325A>T | Verified   | TTA | AAC | CGG | 1 | A | T |
| TCGA-61-2012 | SELE       | ENST00000333360     | p.V84V   | c.252A>T  | Verified   | TGG | GTA | GGA | 3 | A | T |
| TCGA-09-2050 | SEMA3A     | ENST00000265362     | p.N43I   | c.128A>T  | Verified   | TCC | AAC | AAT | 2 | A | T |
| TCGA-61-1914 | SEMA3E     | ENST00000307792     | p.T427S  | c.1279A>T | Unverified | AAA | ACA | GAT | 1 | A | T |

|              |            |                 |          |           |            |     |     |     |   |   |   |
|--------------|------------|-----------------|----------|-----------|------------|-----|-----|-----|---|---|---|
| TCGA-23-1021 | SENP7      | NM_020654.2     | p.K467*  | c.1399A>T | Verified   | ata | aaa | gga | 1 | A | T |
| TCGA-13-0904 | SERPINB5   | ENST00000382771 | p.M307L  | c.919A>T  | Verified   | GGA | ATG | TCA | 1 | A | T |
| TCGA-61-1998 | SgK494     | SU_SgK494       | p.K169N  | c.507A>T  | Verified   | cag | aaa | gct | 3 | A | T |
| TCGA-13-0714 | SLC16A13   | ENST00000308027 | p.Y166F  | c.497A>T  | Verified   | CAC | TAC | GCC | 2 | A | T |
| TCGA-24-1616 | SLCO1B1    | ENST00000256958 | p.K160I  | c.479A>T  | Verified   | GGA | AAA | GGT | 2 | A | T |
| TCGA-20-0991 | SLCO1C1    | ENST00000266509 | p.K481N  | c.1443A>T | Verified   | TGC | AAA | TGT | 3 | A | T |
| TCGA-13-0900 | SLFN5      | ENST00000299977 | p.L488F  | c.1464A>T | Verified   | AGG | TTA | TGC | 3 | A | T |
| TCGA-13-0924 | SLIT1      | ENST00000266058 | p.N1026I | c.3077A>T | Verified   | GGC | AAC | TAC | 2 | A | T |
| TCGA-29-1777 | SMC1B      | NM_148674.1     | p.I83L   | c.247A>T  | Unverified | att | ata | tat | 1 | A | T |
| TCGA-29-1777 | SMC1B_ENS  | ENST00000357450 | p.I83L   | c.247A>T  | Unverified | ATT | ATA | TAT | 1 | A | T |
| TCGA-29-1696 | SMC4       | NM_005496.2     | p.K153M  | c.458A>T  | Unverified | cac | aag | gac | 2 | A | T |
| TCGA-29-1696 | SMC4       | NM_005496.2     | p.K153M  | c.458A>T  | Unverified | cac | aag | gac | 2 | A | T |
| TCGA-24-1422 | SORCS3     | ENST00000369701 | p.N1154I | c.3461A>T | Verified   | ATT | AAC | ATC | 2 | A | T |
| TCGA-04-1347 | SOX5       | ENST00000451604 | p.Q761H  | c.2283A>T | Verified   | gga | caa | gcc | 3 | A | T |
| TCGA-13-1509 | SP110      | ENST00000258381 | p.K593*  | c.1777A>T | Verified   | TCT | AAG | ACC | 1 | A | T |
| TCGA-24-1843 | SPTLC3     | ENST00000399002 | p.T347S  | c.1039A>T | Unverified | CCA | ACC | GGC | 1 | A | T |
| TCGA-13-0887 | ST7        | ENST00000265437 | p.E214D  | c.642A>T  | Unverified | AAT | GAA | ATT | 3 | A | T |
| TCGA-24-1563 | STARD13    | ENST00000336934 | p.V103V  | c.309A>T  | Verified   | CTT | GTA | GAA | 3 | A | T |
| TCGA-61-1907 | SURF4      | ENST00000371989 | p.N120I  | c.359A>T  | Unverified | AGG | AAC | CTG | 2 | A | T |
| TCGA-04-1542 | SVEP1      | ENST00000401783 | p.K189N  | c.567A>T  | Verified   | ACA | AAA | GTT | 3 | A | T |
| TCGA-24-1563 | SYCP2      | ENST00000357552 | p.K1427* | c.4279A>T | Verified   | GAA | AAA | GAT | 1 | A | T |
| TCGA-04-1336 | SYNGAP1    | ENST00000418600 | p.K793*  | c.2377A>T | Verified   | GAA | AAG | CCA | 1 | A | T |
| TCGA-04-1336 | SYNGAP1_EI | ENST00000293748 | p.K793*  | c.2377A>T | Verified   | GAA | AAG | CCA | 1 | A | T |
| TCGA-29-1699 | SYT11      | ENST00000368324 | p.S138C  | c.412A>T  | Unverified | ACA | AGC | CTG | 1 | A | T |
| TCGA-25-2391 | TBX15      | ENST00000207157 | p.Y481F  | c.1442A>T | Unverified | CAG | TAT | GGG | 2 | A | T |
| TCGA-24-1845 | TESK1      | ENST00000336395 | p.Q81H   | c.243A>T  | Unverified | GGG | CAA | GTC | 3 | A | T |
| TCGA-13-0920 | TFAP2D     | ENST00000008391 | p.T414S  | c.1240A>T | Verified   | ACT | ACT | CAC | 1 | A | T |
| TCGA-25-2392 | TFCP2      | ENST00000257915 | p.Q68H   | c.204A>T  | Verified   | TTT | CAA | TAT | 3 | A | T |
| TCGA-30-1857 | TG         | ENST00000220616 | p.L104F  | c.312A>T  | Unverified | ATC | TTA | CTG | 3 | A | T |
| TCGA-10-0930 | THOC7      | ENST00000295899 | p.E182D  | c.546A>T  | Verified   | TTG | GAA | AAT | 3 | A | T |
| TCGA-10-0930 | THOC7      | ENST00000295899 | p.E182D  | c.546A>T  | Verified   | TTG | GAA | AAT | 3 | A | T |
| TCGA-24-1423 | TMC3       | ENST00000359440 | p.S176C  | c.526A>T  | Verified   | GGA | AGC | ACA | 1 | A | T |
| TCGA-09-2049 | TMPRSS15   | ENST00000284885 | p.N457Y  | c.1369A>T | Verified   | GGA | AAT | TAT | 1 | A | T |
| TCGA-61-2009 | TNC        | ENST00000350763 | p.Y779F  | c.2336A>T | Verified   | GAG | TAT | GAG | 2 | A | T |

|              |            |                 |           |            |            |     |     |     |   |   |   |
|--------------|------------|-----------------|-----------|------------|------------|-----|-----|-----|---|---|---|
| TCGA-61-1733 | TP53       | ENST00000269305 | p.K305*   | c.913A>T   | Unverified | ACT | AAG | CGA | 1 | A | T |
| TCGA-61-1733 | TP53       | ENST00000269305 | p.K305*   | c.913A>T   | Unverified | ACT | AAG | CGA | 1 | A | T |
| TCGA-61-1733 | TP53_ENSTC | ENST00000269305 | p.K305*   | c.913A>T   | Unverified | ACT | AAG | CGA | 1 | A | T |
| TCGA-61-1733 | TP53_ENSTC | ENST00000269305 | p.K305*   | c.913A>T   | Unverified | ACT | AAG | CGA | 1 | A | T |
| TCGA-09-2049 | TRAF3IP1   | ENST00000373327 | p.K559N   | c.1677A>T  | Verified   | CCC | AAA | CCT | 3 | A | T |
| TCGA-61-1895 | TRANK1     | ENST00000428977 | p.Y1251F  | c.3752A>T  | Unverified | GCC | TAT | TTC | 2 | A | T |
| TCGA-61-1895 | TRANK1_EN  | ENST00000429976 | p.Y1801F  | c.5402A>T  | Unverified | GCC | TAT | TTC | 2 | A | T |
| TCGA-23-2078 | TRDN       | ENST00000398178 | p.N75I    | c.224A>T   | Unverified | AAA | AAC | TTT | 2 | A | T |
| TCGA-13-0916 | TRIP11     | ENST00000267622 | p.L1868L  | c.5604A>T  | Verified   | TTT | CTA | GAA | 3 | A | T |
| TCGA-29-1769 | TRPV2      | ENST00000338560 | p.Y675F   | c.2024A>T  | Unverified | GGC | TAT | TGG | 2 | A | T |
| TCGA-30-1714 | TSPYL1     | ENST00000368608 | p.T353S   | c.1057A>T  | Unverified | TCT | ACT | CCA | 1 | A | T |
| TCGA-29-2427 | TTN        | NM_003319       | p.R23644* | c.70930A>T | Verified   | gaa | aga | tac | 1 | A | T |
| TCGA-23-1122 | TTN        | NM_003319       | p.K6268M  | c.18803A>T | Verified   | ctg | aag | tgg | 2 | A | T |
| TCGA-61-1900 | TTN        | NM_003319       | p.Y11574F | c.34721A>T | Unverified | tac | tat | ttc | 2 | A | T |
| TCGA-13-0885 | TTN        | NM_003319       | p.E1926D  | c.5778A>T  | Verified   | act | gaa | acc | 3 | A | T |
| TCGA-61-1900 | TTN_ENST0C | ENST00000342175 | p.Y11766F | c.35297A>T | Unverified | TAC | TAT | TTC | 2 | A | T |
| TCGA-61-1900 | TTN_ENST0C | ENST00000342992 | p.Y18071F | c.54212A>T | Unverified | TAC | TAT | TTC | 2 | A | T |
| TCGA-29-2427 | TTN_ENST0C | ENST00000356127 | p.R30139* | c.90415A>T | Verified   | GAA | AGA | TAC | 1 | A | T |
| TCGA-23-1122 | TTN_ENST0C | ENST00000356127 | p.K12765M | c.38294A>T | Verified   | CTG | AAG | TGG | 2 | A | T |
| TCGA-61-1900 | TTN_ENST0C | ENST00000356127 | p.Y18069F | c.54206A>T | Unverified | TAC | TAT | TTC | 2 | A | T |
| TCGA-13-0885 | TTN_ENST0C | ENST00000356127 | p.E1972D  | c.5916A>T  | Verified   | ACT | GAA | ACC | 3 | A | T |
| TCGA-61-1900 | TTN_ENST0C | ENST00000359218 | p.Y11699F | c.35096A>T | Unverified | TAC | TAT | TTC | 2 | A | T |
| TCGA-13-1509 | TTN_ENST0C | ENST00000360870 | p.N3541I  | c.10622A>T | Verified   | AAC | AAT | CGG | 2 | A | T |
| TCGA-13-0885 | TTN_ENST0C | ENST00000360870 | p.E1972D  | c.5916A>T  | Verified   | ACT | GAA | ACC | 3 | A | T |
| TCGA-25-1313 | TUBB2C     | ENST00000340384 | p.T351S   | c.1051A>T  | Unverified | AAA | ACG | GCT | 1 | A | T |
| TCGA-13-0885 | UBR4       | ENST00000375254 | p.Y3544F  | c.10631A>T | Verified   | TGT | TAT | ATC | 2 | A | T |
| TCGA-13-0906 | UGGT2      | ENST00000376747 | p.K719*   | c.2155A>T  | Verified   | GAT | AAG | AGT | 1 | A | T |
| TCGA-24-1844 | UGT1A9     | ENST00000354728 | p.K132*   | c.394A>T   | Unverified | aaa | aaa | tta | 1 | A | T |
| TCGA-61-2008 | UGT1A9     | ENST00000354728 | p.K132I   | c.395A>T   | Verified   | aaa | aaa | tta | 2 | A | T |
| TCGA-25-1318 | USH2A      | ENST00000307340 | p.Q3102H  | c.9306A>T  | Verified   | ACC | CAA | ATT | 3 | A | T |
| TCGA-25-1318 | USH2A      | ENST00000307340 | p.Q3102H  | c.9306A>T  | Verified   | ACC | CAA | ATT | 3 | A | T |
| TCGA-09-2050 | USP34      | ENST00000398571 | p.N1819I  | c.5456A>T  | Verified   | TTC | AAT | CTC | 2 | A | T |
| TCGA-09-2051 | USP48      | ENST00000308271 | p.N580Y   | c.1738A>T  | Unverified | aat | aat | ctg | 1 | A | T |
| TCGA-24-1104 | USP48      | ENST00000308271 | p.K940N   | c.2820A>T  | Verified   | aga | aaa | gtt | 3 | A | T |

|              |                             |                     |          |           |            |     |     |     |   |   |   |
|--------------|-----------------------------|---------------------|----------|-----------|------------|-----|-----|-----|---|---|---|
| TCGA-24-1470 | USP7                        | ENST00000344836     | p.K934I  | c.2801A>T | Verified   | GAG | AAA | GCA | 2 | A | T |
| TCGA-29-1764 | VAV2                        | ENST00000406606     | p.K333I  | c.998A>T  | Unverified | CTC | AAA | TAC | 2 | A | T |
| TCGA-29-1764 | VAV2_ENST00000371850        | ENST00000371850     | p.K338I  | c.1013A>T | Unverified | CTC | AAA | TAC | 2 | A | T |
| TCGA-61-1998 | VCL                         | ENST00000211998     | p.E623D  | c.1869A>T | Verified   | AGG | GAA | GAG | 3 | A | T |
| TCGA-61-1900 | WDR33                       | ENST00000322313     | p.K119*  | c.355A>T  | Unverified | GTA | AAG | TGT | 1 | A | T |
| TCGA-61-1900 | WDR33_ENST00000409658       | ENST00000409658     | p.K119*  | c.355A>T  | Unverified | GTA | AAG | TGT | 1 | A | T |
| TCGA-04-1649 | WRN                         | ENST00000298139     | p.Y1034F | c.3101A>T | Unverified | cgg | tat | aac | 2 | A | T |
| TCGA-29-1784 | ZBED1                       | ENST00000381223     | p.N546I  | c.1637A>T | Unverified | AAC | AAC | ATG | 2 | A | T |
| TCGA-61-1895 | ZFH3                        | ENST00000268489     | p.K2790I | c.8369A>T | Unverified | AGT | AAA | ACC | 2 | A | T |
| TCGA-24-1846 | ZFH4                        | ENST00000521891     | p.K159I  | c.476A>T  | Unverified | AGC | AAA | CTC | 2 | A | T |
| TCGA-04-1347 | ZNF323                      | ENST00000439158     | p.Y267F  | c.800A>T  | Verified   | CCA | TAT | GAA | 2 | A | T |
| TCGA-13-0761 | ZNF449                      | ENST00000339249     | p.K316M  | c.947A>T  | Verified   | aaa | aag | agt | 2 | A | T |
| TCGA-13-0761 | ZNF449                      | ENST00000339249     | p.K316M  | c.947A>T  | Verified   | aaa | aag | agt | 2 | A | T |
| TCGA-24-1843 | ZNF479                      | ENST00000331162     | p.Q276H  | c.828A>T  | Unverified | GGC | CAA | GCC | 3 | A | T |
| TCGA-29-1763 | ZNF518A                     | ENST00000371192     | p.R228*  | c.682A>T  | Unverified | CAT | AGA | CAT | 1 | A | T |
| TCGA-29-1763 | ZNF518A_ENST00000371192_v61 | ENST00000371192_v61 | p.R228*  | c.682A>T  | Unverified | CAT | AGA | CAT | 1 | A | T |
| TCGA-61-2095 | ZNF546                      | ENST00000347077     | p.N595I  | c.1784A>T | Unverified | TAT | AAT | CTT | 2 | A | T |
| TCGA-09-2044 | ZNF765_ENST00000396408      | ENST00000396408     | p.N508Y  | c.1522A>T | Verified   | TCA | AAC | CTT | 1 | A | T |
| TCGA-24-1847 | ZSCAN5B                     | ENST00000358992     | p.T31S   | c.91A>T   | Unverified | GAA | ACT | CAA | 1 | A | T |
| TCGA-24-1847 | ZSCAN5B_ENST00000358992     | ENST00000358992     | p.T31S   | c.91A>T   | Unverified | GAA | ACT | CAA | 1 | A | T |
| TCGA-24-1847 | A2M                         | ENST00000318602     | p.L835I  | c.2503C>A | Unverified | TTC | CTA | GCT | 1 | C | A |
| TCGA-29-1764 | ABCA13_ENST00000435803      | ENST00000435803     | p.P389H  | c.1166C>A | Unverified | AAG | CCC | TGG | 2 | C | A |
| TCGA-13-0913 | ABCA4                       | ENST00000370225     | p.A781D  | c.2342C>A | Verified   | TTC | GCC | TGG | 2 | C | A |
| TCGA-61-1907 | ABCA4                       | ENST00000370225     | p.P1512P | c.4536C>A | Unverified | CCC | CCC | CAG | 3 | C | A |
| TCGA-25-1326 | ABCA5                       | ENST00000392676     | p.H994N  | c.2980C>A | Verified   | TAT | CAT | TTA | 1 | C | A |
| TCGA-24-1104 | ABCA6                       | ENST00000284425     | p.S1541Y | c.4622C>A | Verified   | TAT | TCC | TCT | 2 | C | A |
| TCGA-09-1665 | ABCG4                       | ENST00000307417     | p.T442N  | c.1325C>A | Verified   | CCA | ACT | GTG | 2 | C | A |
| TCGA-13-1497 | ABI3BP                      | ENST00000284322     | p.S500R  | c.1500C>A | Verified   | AAA | AGC | CCT | 3 | C | A |
| TCGA-24-1847 | ABLIM3                      | ENST00000309868     | p.N363K  | c.1089C>A | Unverified | GAG | AAC | CTG | 3 | C | A |
| TCGA-24-2290 | ABLIM3                      | ENST00000309868     | p.S547R  | c.1641C>A | Verified   | CGG | AGC | TCC | 3 | C | A |
| TCGA-24-2290 | ABLIM3                      | ENST00000309868     | p.S547R  | c.1641C>A | Verified   | CGG | AGC | TCC | 3 | C | A |
| TCGA-23-1021 | ABP1                        | ENST00000360937     | p.T215N  | c.644C>A  | Verified   | CCC | ACT | GGG | 2 | C | A |
| TCGA-23-1022 | ABRA                        | ENST00000311955     | p.P63T   | c.187C>A  | Verified   | GCT | CCT | AAA | 1 | C | A |
| TCGA-29-1691 | AC013469_ξ                  | ENST00000408934     | p.L92I   | c.274C>A  | Unverified | CCT | CTT | CAC | 1 | C | A |

|              |           |                 |          |            |            |     |     |     |   |   |   |
|--------------|-----------|-----------------|----------|------------|------------|-----|-----|-----|---|---|---|
| TCGA-13-0916 | ACCN1     | ENST00000225823 | p.P383T  | c.1147C>A  | Verified   | GCC | CCT | TTT | 1 | C | A |
| TCGA-04-1356 | ACCSL     | ENST00000378832 | p.I335I  | c.1005C>A  | Verified   | GAC | ATC | TAC | 3 | C | A |
| TCGA-29-1764 | ACSM2A    | ENST00000396104 | p.L550M  | c.1648C>A  | Unverified | AAC | CTG | CCC | 1 | C | A |
| TCGA-24-1470 | ACTL8     | ENST00000375406 | p.L287M  | c.859C>A   | Verified   | TCC | CTG | CGC | 1 | C | A |
| TCGA-29-1761 | ACTN2     | ENST00000366578 | p.P85H   | c.254C>A   | Unverified | CTG | CCC | AAA | 2 | C | A |
| TCGA-04-1331 | ACTN4     | ENST00000252699 | p.V287V  | c.861C>A   | Unverified | GCT | GTC | AAC | 3 | C | A |
| TCGA-24-2288 | ACTR6     | ENST00000188312 | p.P59H   | c.176C>A   | Unverified | CTC | CCT | TTT | 2 | C | A |
| TCGA-29-1784 | ACTRT1    | ENST00000371124 | p.T368K  | c.1103C>A  | Unverified | ggg | aca | tct | 2 | C | A |
| TCGA-23-1029 | ADAD1     | ENST00000296513 | p.L65I   | c.193C>A   | Unverified | TTG | CTT | TCC | 1 | C | A |
| TCGA-29-1705 | ADAM12    | ENST00000368679 | p.P835P  | c.2505C>A  | Unverified | AGA | CCC | CTG | 3 | C | A |
| TCGA-29-1705 | ADAM12_EN | ENST00000368679 | p.P835P  | c.2505C>A  | Unverified | AGA | CCC | CTG | 3 | C | A |
| TCGA-04-1367 | ADAM19    | NM_023038.2     | p.H350Q  | c.1050C>A  | Verified   | ggc | cac | aac | 3 | C | A |
| TCGA-29-1761 | ADAM28    | ENST00000265769 | p.P724P  | c.2172C>A  | Unverified | CAA | CCC | CAA | 3 | C | A |
| TCGA-29-1702 | ADAM29    | ENST00000359240 | p.Q803K  | c.2407C>A  | Unverified | TCC | CAG | AGG | 1 | C | A |
| TCGA-29-1695 | ADAMTS18  | ENST00000282849 | p.C748*  | c.2244C>A  | Unverified | act | tgc | aag | 3 | C | A |
| TCGA-13-0883 | ADAMTSL1_ | ENST00000380548 | p.Q998K  | c.2992C>A  | Verified   | CAC | CAG | AAC | 1 | C | A |
| TCGA-23-1022 | ADCY3     | ENST00000260600 | p.Y730*  | c.2190C>A  | Verified   | CAG | TAC | TAC | 3 | C | A |
| TCGA-13-0906 | ADCY4     | ENST00000310677 | p.P991P  | c.2973C>A  | Verified   | GGA | CCC | GTA | 3 | C | A |
| TCGA-25-2042 | ADM       | ENST00000278175 | p.S49S   | c.147C>A   | Unverified | ATG | TCC | AGC | 3 | C | A |
| TCGA-13-1498 | ADSS      | ENST00000366535 | p.G165G  | c.495C>A   | Verified   | aag | ggc | att | 3 | C | A |
| TCGA-24-2288 | AFAP1L1   | ENST00000296721 | p.T415T  | c.1245C>A  | Unverified | TCC | ACC | GAG | 3 | C | A |
| TCGA-09-1674 | AGAP3     | ENST00000397238 | p.S829Y  | c.2486C>A  | Unverified | CTC | TCC | AGT | 2 | C | A |
| TCGA-23-2077 | AGXT      | ENST00000307503 | p.D341E  | c.1023C>A  | Unverified | ATA | GAC | CAC | 3 | C | A |
| TCGA-29-1766 | AHCYL1    | ENST00000369799 | p.L517I  | c.1549C>A  | Unverified | GGA | CTC | AAC | 1 | C | A |
| TCGA-04-1336 | AHNAK2_EN | ENST00000333244 | p.D3355E | c.10065C>A | Verified   | ACT | GAC | CTC | 3 | C | A |
| TCGA-04-1361 | AIFM1     | ENST00000319908 | p.P484P  | c.1452C>A  | Verified   | ggc | ccc | gat | 3 | C | A |
| TCGA-04-1361 | AIFM1     | ENST00000319908 | p.P484P  | c.1452C>A  | Verified   | ggc | ccc | gat | 3 | C | A |
| TCGA-04-1356 | AIM2      | ENST00000368130 | p.Q137K  | c.409C>A   | Verified   | AAA | CAG | ATG | 1 | C | A |
| TCGA-61-1740 | AIM2      | ENST00000368130 | p.L317M  | c.949C>A   | Unverified | ACA | CTG | TCA | 1 | C | A |
| TCGA-13-0920 | ALB       | ENST00000295897 | p.A234D  | c.701C>A   | Verified   | AGA | GCT | TTC | 2 | C | A |
| TCGA-29-1761 | ALDH1L1   | ENST00000393434 | p.N227K  | c.681C>A   | Unverified | GGG | AAC | GAC | 3 | C | A |
| TCGA-23-2077 | ALG10B    | ENST00000308742 | p.S14R   | c.42C>A    | Verified   | TTG | AGC | TGT | 3 | C | A |
| TCGA-24-2267 | ALK       | ENST00000389048 | p.F64L   | c.192C>A   | Unverified | ctc | ttc | cgt | 3 | C | A |
| TCGA-61-1740 | ALKBH8    | ENST00000260318 | p.H173Q  | c.519C>A   | Unverified | AAA | CAC | AGA | 3 | C | A |



|              |            |                 |          |           |            |     |     |     |   |   |   |
|--------------|------------|-----------------|----------|-----------|------------|-----|-----|-----|---|---|---|
| TCGA-61-1740 | ALKBH8_EN' | ENST00000428149 | p.H173Q  | c.519C>A  | Unverified | AAA | CAC | AGA | 3 | C | A |
| TCGA-61-1740 | ALKBH8_EN' | ENST00000428149 | p.H173Q  | c.519C>A  | Unverified | AAA | CAC | AGA | 3 | C | A |
| TCGA-13-0884 | ALMS1      | ENST00000264448 | p.A2623A | c.7869C>A | Verified   | AGA | GCC | AAG | 3 | C | A |
| TCGA-13-0906 | ALOXE3     | NM_021628.1     | p.F45L   | c.135C>A  | Unverified | gac | ttc | gcc | 3 | C | A |
| TCGA-13-0755 | ALS2CR11   | ENST00000286195 | p.P289T  | c.865C>A  | Verified   | TAT | CCA | GCA | 1 | C | A |
| TCGA-25-1313 | AMOTL2     | ENST00000249883 | p.P74H   | c.221C>A  | Unverified | GAG | CCC | CAG | 2 | C | A |
| TCGA-04-1338 | AMPD2      | ENST00000342115 | p.D125E  | c.375C>A  | Verified   | ggt | gac | cgg | 3 | C | A |
| TCGA-04-1338 | AMPD2_EN'  | ENST00000393689 | p.D206E  | c.618C>A  | Verified   | GGT | GAC | CGG | 3 | C | A |
| TCGA-61-2094 | ANGPT1     | ENST00000297450 | p.T170T  | c.510C>A  | Unverified | TCC | ACC | TAC | 3 | C | A |
| TCGA-29-1702 | ANK1       | ENST00000347528 | p.S594S  | c.1782C>A | Unverified | ggc | tcc | ccg | 3 | C | A |
| TCGA-29-1702 | ANK1_ENST' | ENST00000265709 | p.S627S  | c.1881C>A | Unverified | GGC | TCC | CCG | 3 | C | A |
| TCGA-61-2095 | ANKRD2     | ENST00000307518 | p.H333N  | c.997C>A  | Unverified | GAG | CAT | CCT | 1 | C | A |
| TCGA-09-2049 | ANKRD24_E  | ENST00000262970 | p.G195G  | c.585C>A  | Verified   | CAT | GGC | AGC | 3 | C | A |
| TCGA-61-2109 | ANKRD55    | ENST00000341048 | p.N566K  | c.1698C>A | Unverified | AAC | AAC | CTA | 3 | C | A |
| TCGA-29-1776 | ANKS1B     | ENST00000547776 | p.P746T  | c.2236C>A | Unverified | TAT | CCT | TCC | 1 | C | A |
| TCGA-20-1687 | ANO5       | ENST00000324559 | p.F385L  | c.1155C>A | Unverified | GTG | TTC | TTT | 3 | C | A |
| TCGA-29-1781 | ANXA2      | ENST00000332680 | p.S135S  | c.405C>A  | Unverified | GCT | TCC | ATG | 3 | C | A |
| TCGA-23-1123 | AP3B2      | ENST00000261722 | p.I903I  | c.2709C>A | Verified   | CCC | ATC | AAG | 3 | C | A |
| TCGA-23-1123 | AP3B2      | ENST00000261722 | p.I903I  | c.2709C>A | Verified   | CCC | ATC | AAG | 3 | C | A |
| TCGA-24-2267 | APOB       | ENST00000233242 | p.Q3088K | c.9262C>A | Verified   | TGG | CAA | GTA | 1 | C | A |
| TCGA-24-2288 | APOB       | ENST00000233242 | p.S1653Y | c.4958C>A | Unverified | ATA | TCT | ACC | 2 | C | A |
| TCGA-29-1781 | APOB       | ENST00000233242 | p.G230G  | c.690C>A  | Unverified | AAA | GGC | ATG | 3 | C | A |
| TCGA-24-1604 | APOL3_ENS' | ENST00000349314 | p.S44Y   | c.131C>A  | Verified   | GTG | TCT | GGT | 2 | C | A |
| TCGA-29-1777 | AQP6       | ENST00000315520 | p.P83T   | c.247C>A  | Unverified | AAC | CCC | GCC | 1 | C | A |
| TCGA-23-1114 | ARHGAP20   | ENST00000260283 | p.P1172T | c.3514C>A | Unverified | agc | cca | gac | 1 | C | A |
| TCGA-13-0760 | ARHGAP21   | NM_020824.2     | p.P795Q  | c.2384C>A | Verified   | agt | ccg | cct | 2 | C | A |
| TCGA-13-0903 | ARHGAP36   | NM_144967.2     | p.L472I  | c.1414C>A | Verified   | cta | ctt | tct | 1 | C | A |
| TCGA-20-1687 | ARHGAP36   | NM_144967.2     | p.S510Y  | c.1529C>A | Unverified | cgt | tcc | cat | 2 | C | A |
| TCGA-61-1740 | ARHGEF10   | NM_014629.1     | p.A849D  | c.2546C>A | Unverified | cat | gct | gta | 2 | C | A |
| TCGA-61-1740 | ARHGEF10_  | ENST00000349830 | p.A1072D | c.3215C>A | Unverified | CAT | GCT | GTA | 2 | C | A |
| TCGA-20-1683 | ARHGEF15   | ENST00000361926 | p.A74D   | c.221C>A  | Unverified | cct | gct | ctt | 2 | C | A |
| TCGA-13-0904 | ARHGEF4    | ENST00000326016 | p.S160R  | c.480C>A  | Verified   | ggg | agc | gag | 3 | C | A |
| TCGA-29-1763 | ARID2      | ENST00000334344 | p.R1273R | c.3817C>A | Unverified | CGA | CGA | GGA | 1 | C | A |
| TCGA-23-1111 | ARID3B     | ENST00000346246 | p.S381Y  | c.1142C>A | Unverified | ATA | TCC | CCA | 2 | C | A |

|              |            |                 |          |           |            |     |     |     |   |   |   |
|--------------|------------|-----------------|----------|-----------|------------|-----|-----|-----|---|---|---|
| TCGA-13-0893 | ARPC3      | ENST00000228825 | p.T36K   | c.107C>A  | Verified   | GAG | ACA | AAA | 2 | C | A |
| TCGA-24-1844 | ARR3       | ENST00000307959 | p.Q195K  | c.583C>A  | Unverified | CTA | CAA | CTC | 1 | C | A |
| TCGA-13-1408 | ASB11      | ENST00000480796 | p.A264E  | c.791C>A  | Unverified | agt | gcg | ctt | 2 | C | A |
| TCGA-23-1022 | ASNSD1     | ENST00000260952 | p.P243H  | c.728C>A  | Verified   | GTT | CCT | TTA | 2 | C | A |
| TCGA-24-1843 | ASTE1      | ENST00000264992 | p.F63L   | c.189C>A  | Unverified | AAA | TTC | TTT | 3 | C | A |
| TCGA-23-1031 | ASTN1      | ENST00000361833 | p.D291E  | c.873C>A  | Verified   | agt | gac | aat | 3 | C | A |
| TCGA-13-0883 | ATF7IP     | ENST00000261168 | p.T155T  | c.465C>A  | Verified   | tcc | acc | tct | 3 | C | A |
| TCGA-24-1423 | ATP13A1    | ENST00000357324 | p.A500D  | c.1499C>A | Verified   | CTG | GCC | GTC | 2 | C | A |
| TCGA-13-0791 | ATP9B      | ENST00000307671 | p.T472T  | c.1416C>A | Verified   | gga | acc | ctc | 3 | C | A |
| TCGA-23-1120 | AVIL       | ENST00000257861 | p.L425M  | c.1273C>A | Unverified | TAT | CTG | GTC | 1 | C | A |
| TCGA-13-0885 | AVPR1B     | ENST00000367126 | p.A188E  | c.563C>A  | Verified   | TGG | GCA | GAC | 2 | C | A |
| TCGA-29-1781 | AXL        | ENST00000359092 | p.V178V  | c.534C>A  | Unverified | GCT | GTC | CCC | 3 | C | A |
| TCGA-24-0975 | B3GALT1    | ENST00000392690 | p.P124H  | c.371C>A  | Verified   | GAT | CCT | GTT | 2 | C | A |
| TCGA-13-0755 | B4GALNT2   | ENST00000300404 | p.A533D  | c.1598C>A | Verified   | GCT | GCC | CTA | 2 | C | A |
| TCGA-09-2044 | B4GALT5    | ENST00000371711 | p.T113N  | c.338C>A  | Verified   | CAT | ACC | TGC | 2 | C | A |
| TCGA-23-1022 | B9D2       | ENST00000243578 | p.S37*   | c.110C>A  | Verified   | CTG | TCA | GGC | 2 | C | A |
| TCGA-13-1501 | BAI2       | ENST00000373658 | p.L178I  | c.532C>A  | Verified   | GCC | CTA | GCC | 1 | C | A |
| TCGA-13-1501 | BAI2       | ENST00000373658 | p.L178I  | c.532C>A  | Verified   | GCC | CTA | GCC | 1 | C | A |
| TCGA-13-1408 | BAI2       | ENST00000373658 | p.T997N  | c.2990C>A | Unverified | TGC | ACC | ATG | 2 | C | A |
| TCGA-24-1470 | BAI2       | ENST00000373658 | p.T149N  | c.446C>A  | Verified   | TTT | ACC | TTC | 2 | C | A |
| TCGA-23-1110 | BAI3       | ENST00000370598 | p.Q1358K | c.4072C>A | Unverified | GAC | CAG | TTC | 1 | C | A |
| TCGA-24-2280 | BAI3       | ENST00000370598 | p.Q142K  | c.424C>A  | Unverified | TTA | CAG | AAA | 1 | C | A |
| TCGA-30-1718 | BAI3       | ENST00000370598 | p.G473G  | c.1419C>A | Unverified | GAT | GGC | GGC | 3 | C | A |
| TCGA-04-1338 | BAZ2B      | ENST00000392783 | p.S429S  | c.1287C>A | Verified   | AGA | TCC | AAA | 3 | C | A |
| TCGA-61-2113 | BCAN       | ENST00000329117 | p.R896S  | c.2686C>A | Unverified | GGA | CGC | TGG | 1 | C | A |
| TCGA-23-1029 | BCAS1      | ENST00000395961 | p.P8P    | c.24C>A   | Unverified | GTT | CCC | CAA | 3 | C | A |
| TCGA-13-0887 | BCAT2      | ENST00000316273 | p.P82H   | c.245C>A  | Verified   | CAG | CCC | TTC | 2 | C | A |
| TCGA-09-2050 | BCL3       | ENST00000164227 | p.P444Q  | c.1331C>A | Unverified | CGG | CCG | GTG | 2 | C | A |
| TCGA-04-1655 | BCL9L      | NM_182557.1     | p.A274A  | c.822C>A  | Unverified | cgg | gcc | aag | 3 | C | A |
| TCGA-04-1655 | BCL9L_ENST | ENST00000392849 | p.A274A  | c.822C>A  | Unverified | CGG | GCC | AAG | 3 | C | A |
| TCGA-09-2044 | BDKRB1     | ENST00000216629 | p.H199N  | c.595C>A  | Verified   | TGG | CAC | TTT | 1 | C | A |
| TCGA-24-1845 | BEND2      | ENST00000380033 | p.N21K   | c.63C>A   | Unverified | GAT | AAC | AAT | 3 | C | A |
| TCGA-24-1844 | BHMT       | ENST00000274353 | p.T135N  | c.404C>A  | Unverified | GAA | ACT | GAA | 2 | C | A |
| TCGA-04-1542 | BICC1      | ENST00000373886 | p.P226H  | c.677C>A  | Verified   | TCC | CCC | TCT | 2 | C | A |

|              |          |                 |          |           |            |     |     |     |   |   |   |
|--------------|----------|-----------------|----------|-----------|------------|-----|-----|-----|---|---|---|
| TCGA-13-1498 | BMP15    | ENST00000252677 | p.L293I  | c.877C>A  | Verified   | TCC | CTC | CAC | 1 | C | A |
| TCGA-24-1417 | BMPER    | ENST00000297161 | p.V680V  | c.2040C>A | Unverified | CCA | GTC | CTT | 3 | C | A |
| TCGA-23-1123 | BMPR2    | ENST00000374580 | p.P283T  | c.847C>A  | Verified   | tat | ccc | aat | 1 | C | A |
| TCGA-23-1123 | BMPR2    | ENST00000374580 | p.P283T  | c.847C>A  | Verified   | tat | ccc | aat | 1 | C | A |
| TCGA-30-1857 | BNC1     | ENST00000345382 | p.S847Y  | c.2540C>A | Unverified | AAC | TCT | GGC | 2 | C | A |
| TCGA-04-1338 | BNC1     | ENST00000345382 | p.N393K  | c.1179C>A | Unverified | TGT | AAC | ATG | 3 | C | A |
| TCGA-13-0906 | BOC      | ENST00000355385 | p.P823T  | c.2467C>A | Verified   | CCA | CCC | CCA | 1 | C | A |
| TCGA-04-1337 | BOC      | ENST00000355385 | p.T721K  | c.2162C>A | Unverified | TTC | ACG | GAT | 2 | C | A |
| TCGA-09-2050 | BRCA2    | ENST00000380152 | p.S1882* | c.5645C>A | Verified   | AAA | TCA | AAA | 2 | C | A |
| TCGA-04-1331 | BRCA2    | ENST00000380152 | p.C711*  | c.2133C>A | Verified   | TCA | TGC | CTG | 3 | C | A |
| TCGA-23-1021 | BRF1     | ENST00000546474 | p.A549A  | c.1647C>A | Verified   | AGC | GCC | GGC | 3 | C | A |
| TCGA-10-0930 | BRI3BP   | ENST00000341446 | p.L82M   | c.244C>A  | Verified   | GTG | CTG | GGA | 1 | C | A |
| TCGA-10-0930 | BRI3BP   | ENST00000341446 | p.L82M   | c.244C>A  | Verified   | GTG | CTG | GGA | 1 | C | A |
| TCGA-23-1022 | BRSK1    | ENST00000309383 | p.P194P  | c.582C>A  | Verified   | TCC | CCC | CAT | 3 | C | A |
| TCGA-24-1103 | BSN      | ENST00000296452 | p.H899Q  | c.2697C>A | Verified   | CCC | CAC | AAT | 3 | C | A |
| TCGA-13-0792 | BTBD3    | ENST00000378226 | p.A303E  | c.908C>A  | Unverified | CTG | GCG | TTG | 2 | C | A |
| TCGA-24-1846 | BTF3L4   | ENST00000313334 | p.L145I  | c.433C>A  | Unverified | GAT | CTT | GTA | 1 | C | A |
| TCGA-24-1849 | BTNL9    | ENST00000327705 | p.S223R  | c.669C>A  | Unverified | CTC | AGC | AAT | 3 | C | A |
| TCGA-13-0793 | C10orf12 | ENST00000286067 | p.S526*  | c.1577C>A | Unverified | AGT | TCA | GAT | 2 | C | A |
| TCGA-24-2262 | C11orf40 | ENST00000307616 | p.C99*   | c.297C>A  | Verified   | CCT | TGC | TTT | 3 | C | A |
| TCGA-04-1347 | C11orf42 | ENST00000316375 | p.P271H  | c.812C>A  | Verified   | AAA | CCC | ACC | 2 | C | A |
| TCGA-04-1655 | C13orf33 | ENST00000380482 | p.S191R  | c.573C>A  | Unverified | TTA | AGC | TTT | 3 | C | A |
| TCGA-20-1685 | C15orf2  | ENST00000329468 | p.P307H  | c.920C>A  | Unverified | AAG | CCT | TTC | 2 | C | A |
| TCGA-24-2280 | C15orf2  | ENST00000329468 | p.P623Q  | c.1868C>A | Unverified | TCC | CCA | CTT | 2 | C | A |
| TCGA-24-2280 | C15orf63 | ENST00000406925 | p.R34R   | c.100C>A  | Unverified | CCA | CGG | AAA | 1 | C | A |
| TCGA-20-1687 | C16orf71 | ENST00000299320 | p.S60S   | c.180C>A  | Unverified | ACC | TCC | CTG | 3 | C | A |
| TCGA-13-0762 | C17orf49 | ENST00000439424 | p.P129H  | c.386C>A  | Unverified | GGT | CCC | CCC | 2 | C | A |
| TCGA-13-0762 | C17orf49 | ENST00000439424 | p.P129H  | c.386C>A  | Unverified | GGT | CCC | CCC | 2 | C | A |
| TCGA-13-1510 | C17orf63 | ENST00000452648 | p.P250P  | c.750C>A  | Unverified | ATC | CCC | CTT | 3 | C | A |
| TCGA-24-1845 | C19orf46 | ENST00000324444 | p.T245K  | c.734C>A  | Unverified | TCC | ACA | GAG | 2 | C | A |
| TCGA-24-2289 | C19orf55 | ENST00000396908 | p.T32N   | c.95C>A   | Unverified | CAG | ACC | TGG | 2 | C | A |
| TCGA-13-0906 | C1orf101 | ENST00000366533 | p.P683T  | c.2047C>A | Verified   | CGA | CCT | AGT | 1 | C | A |
| TCGA-13-1481 | C20orf46 | ENST00000381894 | p.T55T   | c.165C>A  | Verified   | cca | acc | agg | 3 | C | A |
| TCGA-23-2078 | C21orf33 | ENST00000291577 | p.H88N   | c.262C>A  | Verified   | ATG | CAC | GTG | 1 | C | A |

|              |            |                 |          |           |            |     |     |     |   |   |   |
|--------------|------------|-----------------|----------|-----------|------------|-----|-----|-----|---|---|---|
| TCGA-20-1685 | C2CD3      | ENST00000313663 | p.T1610N | c.4829C>A | Unverified | TCC | ACC | CAG | 2 | C | A |
| TCGA-20-1685 | C2CD3_ENS  | ENST00000334126 | p.T1610N | c.4829C>A | Unverified | TCC | ACC | CAG | 2 | C | A |
| TCGA-24-1463 | C2orf89    | ENST00000409520 | p.D92E   | c.276C>A  | Verified   | ACA | GAC | CCC | 3 | C | A |
| TCGA-13-1488 | C3         | ENST00000245907 | p.T1341N | c.4022C>A | Verified   | GGC | ACC | TTG | 2 | C | A |
| TCGA-24-1846 | C3AR1      | ENST00000307637 | p.L43M   | c.127C>A  | Unverified | ggg | ctg | gtg | 1 | C | A |
| TCGA-13-0904 | C3orf20    | ENST00000253697 | p.L28L   | c.84C>A   | Verified   | AAA | CTC | CTC | 3 | C | A |
| TCGA-29-1701 | C3orf79    | ENST00000446603 | p.L42I   | c.124C>A  | Unverified | TTG | CTT | TAC | 1 | C | A |
| TCGA-04-1367 | C4orf50    | ENST00000324058 | p.Q114K  | c.340C>A  | Unverified | GCG | CAG | AAC | 1 | C | A |
| TCGA-04-1361 | C5orf42    | ENST00000274258 | p.S1059Y | c.3176C>A | Verified   | TCA | TCT | CAA | 2 | C | A |
| TCGA-04-1361 | C5orf42    | ENST00000274258 | p.S1059Y | c.3176C>A | Verified   | TCA | TCT | CAA | 2 | C | A |
| TCGA-61-1914 | C5orf42    | ENST00000274258 | p.P417H  | c.1250C>A | Unverified | CTT | CCT | GTA | 2 | C | A |
| TCGA-61-1914 | C5orf42_EN | ENST00000425232 | p.P1536H | c.4607C>A | Unverified | CTT | CCT | GTA | 2 | C | A |
| TCGA-13-0760 | C7orf52    | ENST00000300303 | p.A38D   | c.113C>A  | Verified   | GAG | GCC | GAG | 2 | C | A |
| TCGA-13-0916 | C7orf52    | ENST00000300303 | p.P285H  | c.854C>A  | Unverified | TTC | CCC | ATC | 2 | C | A |
| TCGA-23-1122 | C7orf70    | ENST00000313324 | p.P150H  | c.449C>A  | Unverified | GAG | CCT | CGG | 2 | C | A |
| TCGA-23-1114 | C8orf47    | ENST00000318528 | p.T21N   | c.62C>A   | Unverified | GTA | ACT | TCA | 2 | C | A |
| TCGA-24-2035 | C9orf171   | ENST00000343036 | p.P266T  | c.796C>A  | Verified   | CCG | CCC | GTG | 1 | C | A |
| TCGA-29-1691 | C9orf30    | ENST00000395067 | p.Q209K  | c.625C>A  | Unverified | TTA | CAA | CTG | 1 | C | A |
| TCGA-13-0887 | C9orf79    | ENST00000325643 | p.G317G  | c.951C>A  | Verified   | TGG | GGC | CTC | 3 | C | A |
| TCGA-24-1847 | CABS1      | ENST00000273936 | p.T227N  | c.680C>A  | Unverified | ACT | ACT | ATT | 2 | C | A |
| TCGA-13-0760 | CACNA1C    | ENST00000402845 | p.A101E  | c.302C>A  | Verified   | AAT | GCG | ACC | 2 | C | A |
| TCGA-13-1509 | CACNA1C    | ENST00000402845 | p.A1843D | c.5528C>A | Verified   | AAC | GCC | AAC | 2 | C | A |
| TCGA-04-1337 | CACNG3     | ENST00000005284 | p.Y89*   | c.267C>A  | Unverified | GAC | TAC | GAA | 3 | C | A |
| TCGA-29-2427 | CACNG6     | ENST00000252729 | p.C114*  | c.342C>A  | Verified   | AAC | TGC | ACC | 3 | C | A |
| TCGA-13-0900 | CADM3      | ENST00000368124 | p.H387Q  | c.1161C>A | Verified   | GGC | CAC | TAC | 3 | C | A |
| TCGA-04-1342 | CAMK4      | ENST00000512453 | p.A329E  | c.986C>A  | Verified   | gca | gcg | gtg | 2 | C | A |
| TCGA-24-1845 | CAMTA1     | ENST00000303635 | p.L196I  | c.586C>A  | Unverified | ATC | CTC | TGC | 1 | C | A |
| TCGA-23-1029 | CAPN13     | ENST00000295055 | p.H206Q  | c.618C>A  | Unverified | CTG | CAC | TCT | 3 | C | A |
| TCGA-29-1781 | CAPN3      | ENST00000357568 | p.N770K  | c.2310C>A | Unverified | ATG | AAC | ATC | 3 | C | A |
| TCGA-29-1781 | CAPN3_ENS  | ENST00000356316 | p.N683K  | c.2049C>A | Unverified | ATG | AAC | ATC | 3 | C | A |
| TCGA-24-1849 | CARD14     | ENST00000573882 | p.L331M  | c.991C>A  | Unverified | CTG | CTG | CAG | 1 | C | A |
| TCGA-13-0885 | CARD14     | ENST00000573882 | p.S463S  | c.1389C>A | Verified   | ACG | TCC | AGC | 3 | C | A |
| TCGA-24-1849 | CARD14_EN  | ENST00000309710 | p.L94M   | c.280C>A  | Unverified | CTG | CTG | CAG | 1 | C | A |
| TCGA-04-1356 | CARD18     | ENST00000530950 | p.T21K   | c.62C>A   | Verified   | GGC | ACA | ATA | 2 | C | A |

|              |          |                 |          |           |            |     |     |     |   |   |   |
|--------------|----------|-----------------|----------|-----------|------------|-----|-----|-----|---|---|---|
| TCGA-61-1740 | CARD6    | ENST00000254691 | p.P768H  | c.2303C>A | Unverified | CAT | CCT | TTG | 2 | C | A |
| TCGA-61-1740 | CASK     | ENST00000378166 | p.F91L   | c.273C>A  | Unverified | GTT | TTC | GAA | 3 | C | A |
| TCGA-29-1762 | CASQ2    | ENST00000261448 | p.R121S  | c.361C>A  | Unverified | GAT | CGC | ACA | 1 | C | A |
| TCGA-24-1849 | CATSPER1 | ENST00000312106 | p.P100T  | c.298C>A  | Unverified | GCT | CCC | TCT | 1 | C | A |
| TCGA-13-0904 | CCBE1    | ENST00000439986 | p.P263T  | c.787C>A  | Verified   | GGA | CCA | AAG | 1 | C | A |
| TCGA-04-1331 | CCDC102A | ENST00000258214 | p.T245K  | c.734C>A  | Verified   | GCC | ACG | GAG | 2 | C | A |
| TCGA-24-2024 | CCDC135  | ENST00000360716 | p.Q743K  | c.2227C>A | Unverified | CGG | CAG | GTG | 1 | C | A |
| TCGA-25-2042 | CCDC141  | ENST00000343876 | p.S271S  | c.813C>A  | Verified   | CTT | TCC | TTA | 3 | C | A |
| TCGA-23-1022 | CCDC165  | ENST00000359865 | p.P542H  | c.1625C>A | Verified   | TCC | CCC | TTG | 2 | C | A |
| TCGA-61-2094 | CCDC17   | ENST00000343901 | p.S200Y  | c.599C>A  | Unverified | TAT | TCT | CCA | 2 | C | A |
| TCGA-23-1118 | CCDC60   | ENST00000327554 | p.D201E  | c.603C>A  | Verified   | AAG | GAC | AAG | 3 | C | A |
| TCGA-04-1343 | CCDC61   | ENST00000263284 | p.R155S  | c.463C>A  | Verified   | AAC | CGC | AAG | 1 | C | A |
| TCGA-23-1029 | CCNA1    | ENST00000255465 | p.P73T   | c.217C>A  | Unverified | gcc | ccg | ctg | 1 | C | A |
| TCGA-24-1604 | CCNL2    | ENST00000400809 | p.R495R  | c.1483C>A | Verified   | CGA | CGA | GAG | 1 | C | A |
| TCGA-04-1651 | CCR3     | ENST00000357422 | p.P254H  | c.761C>A  | Unverified | aca | ccc | tac | 2 | C | A |
| TCGA-04-1651 | CCR3     | ENST00000357422 | p.P254H  | c.761C>A  | Unverified | aca | ccc | tac | 2 | C | A |
| TCGA-29-1775 | CCT8L1   | ENST00000021776 | p.T305K  | c.914C>A  | Unverified | CTC | ACA | CTG | 2 | C | A |
| TCGA-29-1777 | CCT8L2   | ENST00000359963 | p.A44D   | c.131C>A  | Unverified | CTG | GCC | AGT | 2 | C | A |
| TCGA-13-0923 | CD163L1  | ENST00000313599 | p.A764D  | c.2291C>A | Verified   | GAA | GCC | TCT | 2 | C | A |
| TCGA-09-2049 | CD5      | ENST00000347785 | p.A306D  | c.917C>A  | Verified   | TCA | GCC | AGG | 2 | C | A |
| TCGA-61-1914 | CD5      | ENST00000347785 | p.R292R  | c.876C>A  | Unverified | GTG | CGC | CAG | 3 | C | A |
| TCGA-29-1761 | CD93     | ENST00000246006 | p.Q559K  | c.1675C>A | Unverified | CCC | CAG | GAG | 1 | C | A |
| TCGA-29-1781 | CDH12    | ENST00000382254 | p.D696E  | c.2088C>A | Unverified | CCA | GAC | TCT | 3 | C | A |
| TCGA-13-0762 | CDH17    | ENST00000027335 | p.P701T  | c.2101C>A | Verified   | GGT | CCC | CAT | 1 | C | A |
| TCGA-13-0762 | CDH17    | ENST00000027335 | p.P701T  | c.2101C>A | Verified   | GGT | CCC | CAT | 1 | C | A |
| TCGA-61-1900 | CDH20    | ENST00000262717 | p.P77T   | c.229C>A  | Unverified | GAC | CCT | TTG | 1 | C | A |
| TCGA-13-0920 | CDH8     | ENST00000577390 | p.P15T   | c.43C>A   | Verified   | ACT | CCA | TTA | 1 | C | A |
| TCGA-23-1032 | CDKL5    | ENST00000379996 | p.T990T  | c.2970C>A | Verified   | cca | acc | cag | 3 | C | A |
| TCGA-23-1124 | CEACAM21 | ENST00000401445 | p.L164M  | c.490C>A  | Verified   | GTC | CTG | ACC | 1 | C | A |
| TCGA-61-1733 | CEL      | ENST00000372080 | p.Q749K  | c.2245C>A | Unverified | GCT | CAG | ATG | 1 | C | A |
| TCGA-61-1733 | CEL      | ENST00000372080 | p.Q749K  | c.2245C>A | Unverified | GCT | CAG | ATG | 1 | C | A |
| TCGA-29-1763 | CELSR1   | ENST00000262738 | p.F2518L | c.7554C>A | Unverified | GTG | TTC | GTG | 3 | C | A |
| TCGA-61-1738 | CELSR1   | ENST00000262738 | p.F2518L | c.7554C>A | Unverified | GTG | TTC | GTG | 3 | C | A |
| TCGA-61-1738 | CELSR1   | ENST00000262738 | p.F2518L | c.7554C>A | Unverified | GTG | TTC | GTG | 3 | C | A |

|              |            |                 |          |           |            |     |     |     |   |   |   |
|--------------|------------|-----------------|----------|-----------|------------|-----|-----|-----|---|---|---|
| TCGA-25-1313 | CELSR2     | ENST00000271332 | p.P136Q  | c.407C>A  | Unverified | CAC | CCG | TGC | 2 | C | A |
| TCGA-04-1342 | CENPJ      | ENST00000381884 | p.T515K  | c.1544C>A | Unverified | TGC | ACA | GGG | 2 | C | A |
| TCGA-25-1326 | CENPP      | ENST00000375587 | p.H62N   | c.184C>A  | Verified   | GGA | CAT | TTA | 1 | C | A |
| TCGA-24-2288 | CEP128     | ENST00000281129 | p.D392E  | c.1176C>A | Unverified | AAA | GAC | AAG | 3 | C | A |
| TCGA-61-1907 | CEP164     | ENST00000278935 | p.V1278V | c.3834C>A | Unverified | AGT | GTC | CTC | 3 | C | A |
| TCGA-13-1498 | CEP57      | ENST00000325542 | p.Q428K  | c.1282C>A | Verified   | AAA | CAG | AAG | 1 | C | A |
| TCGA-25-1326 | CEP72      | ENST00000264935 | p.C437*  | c.1311C>A | Unverified | GGC | TGC | AGG | 3 | C | A |
| TCGA-20-1685 | CFHR5      | ENST00000256785 | p.S454Y  | c.1361C>A | Unverified | CCA | TCT | ATT | 2 | C | A |
| TCGA-25-1326 | CGN        | ENST00000271636 | p.L475I  | c.1423C>A | Unverified | GAA | CTT | CTG | 1 | C | A |
| TCGA-61-1900 | CGN        | ENST00000271636 | p.D1015E | c.3045C>A | Unverified | CAG | GAC | CTG | 3 | C | A |
| TCGA-23-1116 | CHKB       | ENST00000406938 | p.R151R  | c.451C>A  | Unverified | AGT | CGG | CCA | 1 | C | A |
| TCGA-29-2427 | CHPF2      | ENST00000035307 | p.Q279K  | c.835C>A  | Verified   | CAG | CAG | TAT | 1 | C | A |
| TCGA-09-2050 | CHRA1      | ENST00000220913 | p.I27I   | c.81C>A   | Verified   | GTC | ATC | ATG | 3 | C | A |
| TCGA-29-1770 | CHRD       | ENST00000204604 | p.S919Y  | c.2756C>A | Unverified | CTG | TCC | TGT | 2 | C | A |
| TCGA-13-1507 | CHST10     | ENST00000264249 | p.C92*   | c.276C>A  | Verified   | GTC | TGC | AGG | 3 | C | A |
| TCGA-10-0930 | CIDEA      | ENST00000342845 | p.P150T  | c.448C>A  | Verified   | GTC | CCC | ACT | 1 | C | A |
| TCGA-10-0930 | CIDEA      | ENST00000342845 | p.P150T  | c.448C>A  | Verified   | GTC | CCC | ACT | 1 | C | A |
| TCGA-13-0792 | CIITA      | ENST00000324288 | p.A691D  | c.2072C>A | Unverified | ATG | GCC | AAA | 2 | C | A |
| TCGA-13-1510 | CILP2      | ENST00000291495 | p.P1107T | c.3319C>A | Unverified | GAG | CCA | CCG | 1 | C | A |
| TCGA-13-0793 | CLCN4      | ENST00000380833 | p.G182G  | c.546C>A  | Verified   | tct | ggc | ata | 3 | C | A |
| TCGA-29-1783 | CLCN5      | ENST00000376108 | p.L528M  | c.1582C>A | Unverified | gaa | ctg | act | 1 | C | A |
| TCGA-29-1783 | CLCN5_ENST | ENST00000376088 | p.L598M  | c.1792C>A | Unverified | GAA | CTG | ACT | 1 | C | A |
| TCGA-23-1122 | CLDN16     | ENST00000264734 | p.A241D  | c.722C>A  | Verified   | atg | gct | ggg | 2 | C | A |
| TCGA-25-2401 | CLDN18_EN  | ENST00000343735 | p.A91D   | c.272C>A  | Verified   | GGT | GCC | ATT | 2 | C | A |
| TCGA-20-0990 | CLDN2      | ENST00000541806 | p.T56K   | c.167C>A  | Verified   | gcc | aca | cac | 2 | C | A |
| TCGA-13-0760 | CLEC4F     | ENST00000272367 | p.H93Q   | c.279C>A  | Verified   | CAC | CAC | TTT | 3 | C | A |
| TCGA-29-1696 | CLEC5A     | ENST00000546910 | p.Q49K   | c.145C>A  | Unverified | TCA | CAG | ATT | 1 | C | A |
| TCGA-29-1696 | CLEC5A     | ENST00000546910 | p.Q49K   | c.145C>A  | Unverified | TCA | CAG | ATT | 1 | C | A |
| TCGA-61-2094 | CLK1       | ENST00000321356 | p.H233N  | c.697C>A  | Unverified | GAG | CAT | CAT | 1 | C | A |
| TCGA-61-1733 | CLRN1      | ENST00000327047 | p.L230I  | c.688C>A  | Unverified | GAT | CTA | ATG | 1 | C | A |
| TCGA-61-1733 | CLRN1      | ENST00000327047 | p.L230I  | c.688C>A  | Unverified | GAT | CTA | ATG | 1 | C | A |
| TCGA-13-0761 | CLUL1      | ENST00000338387 | p.P428T  | c.1282C>A | Verified   | CTG | CCT | TCC | 1 | C | A |
| TCGA-13-0761 | CLUL1      | ENST00000338387 | p.P428T  | c.1282C>A | Verified   | CTG | CCT | TCC | 1 | C | A |
| TCGA-20-1685 | CNGA1      | ENST00000358519 | p.L461I  | c.1381C>A | Unverified | AAA | CTA | AGA | 1 | C | A |

|              |                            |                     |          |           |            |     |     |     |   |   |   |
|--------------|----------------------------|---------------------|----------|-----------|------------|-----|-----|-----|---|---|---|
| TCGA-61-1914 | CNGA2                      | ENST00000329903     | p.A625D  | c.1874C>A | Unverified | ggg | gcc | cag | 2 | C | A |
| TCGA-23-2078 | CNIH4                      | ENST00000465271     | p.N92K   | c.276C>A  | Verified   | GGT | AAC | ATG | 3 | C | A |
| TCGA-13-0893 | CNKS3                      | ENST00000367213     | p.S296Y  | c.887C>A  | Verified   | GGG | TCT | TTC | 2 | C | A |
| TCGA-24-2035 | CNTFR                      | ENST00000351266     | p.R167R  | c.501C>A  | Verified   | ATT | CGC | TAC | 3 | C | A |
| TCGA-23-1118 | CNTN1                      | ENST00000551295     | p.P892Q  | c.2675C>A | Verified   | cct | cca | agt | 2 | C | A |
| TCGA-04-1542 | CNTNAP2                    | ENST00000361727     | p.Q881K  | c.2641C>A | Verified   | GAC | CAG | TGG | 1 | C | A |
| TCGA-29-1761 | CNTNAP2                    | ENST00000361727     | p.R114R  | c.340C>A  | Unverified | TAC | CGG | ATG | 1 | C | A |
| TCGA-13-0906 | COBL                       | ENST00000265136     | p.L978M  | c.2932C>A | Verified   | TCA | CTG | GTT | 1 | C | A |
| TCGA-23-1022 | COL11A2                    | ENST00000341947     | p.P252Q  | c.755C>A  | Verified   | CAA | CCA | TCA | 2 | C | A |
| TCGA-29-1699 | COL14A1                    | ENST00000297848     | p.P1347T | c.4039C>A | Unverified | gga | cct | gaa | 1 | C | A |
| TCGA-13-0886 | COL16A1                    | ENST00000373672     | p.T85N   | c.254C>A  | Verified   | GTG | ACC | CAG | 2 | C | A |
| TCGA-09-1674 | COL17A1                    | ENST00000353479     | p.P652T  | c.1954C>A | Unverified | GAA | CCA | GGT | 1 | C | A |
| TCGA-23-2077 | COL4A4                     | ENST00000396625     | p.I1680I | c.5040C>A | Verified   | AAA | ATC | AGC | 3 | C | A |
| TCGA-29-1761 | COL5A3                     | ENST00000264828     | p.P706T  | c.2116C>A | Unverified | CCT | CCG | GGC | 1 | C | A |
| TCGA-24-1845 | COL6A6                     | ENST00000358511     | p.P1607H | c.4820C>A | Unverified | GGG | CCT | CCA | 2 | C | A |
| TCGA-24-1845 | COL6A6_ENST00000358511_v70 | ENST00000358511_v70 | p.P1607H | c.4820C>A | Unverified | GGG | CCT | CCA | 2 | C | A |
| TCGA-29-1691 | COL9A1                     | ENST00000357250     | p.P29H   | c.86C>A   | Unverified | CGC | CCC | AGA | 2 | C | A |
| TCGA-29-1761 | COPA                       | ENST00000241704     | p.R233R  | c.699C>A  | Unverified | TGG | CGC | ATG | 3 | C | A |
| TCGA-29-1761 | COPA_ENST00000368069       | ENST00000368069     | p.R233R  | c.699C>A  | Unverified | TGG | CGC | ATG | 3 | C | A |
| TCGA-29-1762 | COQ6                       | ENST00000334571     | p.H392Q  | c.1176C>A | Unverified | CAT | CAC | CTC | 3 | C | A |
| TCGA-13-0900 | CORO2B                     | ENST00000566799     | p.Y364*  | c.1092C>A | Verified   | TCC | TAC | CAG | 3 | C | A |
| TCGA-13-1501 | CPA4                       | ENST00000222482     | p.Q296K  | c.886C>A  | Verified   | ATC | CAA | AAA | 1 | C | A |
| TCGA-13-1501 | CPA4                       | ENST00000222482     | p.Q296K  | c.886C>A  | Verified   | ATC | CAA | AAA | 1 | C | A |
| TCGA-13-0904 | CPE                        | ENST00000402744     | p.P299Q  | c.896C>A  | Verified   | CCA | CCA | TGT | 2 | C | A |
| TCGA-23-1123 | CPEB1                      | ENST00000398591     | p.P35H   | c.104C>A  | Verified   | CGA | CCC | TGG | 2 | C | A |
| TCGA-23-1123 | CPEB1                      | ENST00000398591     | p.P35H   | c.104C>A  | Verified   | CGA | CCC | TGG | 2 | C | A |
| TCGA-20-1683 | CPEB4                      | ENST00000265085     | p.P196T  | c.586C>A  | Unverified | GTC | CCT | GCT | 1 | C | A |
| TCGA-13-0714 | CPS1                       | ENST00000233072     | p.T1227T | c.3681C>A | Verified   | GCT | ACC | CGG | 3 | C | A |
| TCGA-09-1674 | CR1                        | ENST00000400960     | p.L1685L | c.5055C>A | Unverified | GAC | CTC | AGA | 3 | C | A |
| TCGA-13-0920 | CR1                        | ENST00000400960     | p.P891P  | c.2673C>A | Verified   | TTT | CCC | TTT | 3 | C | A |
| TCGA-09-1674 | CR1_ENST00000367049        | ENST00000367049     | p.L2135L | c.6405C>A | Unverified | GAC | CTC | AGA | 3 | C | A |
| TCGA-13-0886 | CRYBB1                     | ENST00000215939     | p.H149Q  | c.447C>A  | Verified   | GAG | CAC | AAA | 3 | C | A |
| TCGA-29-1781 | CSMD3                      | ENST00000297405     | p.H2861N | c.8581C>A | Unverified | gat | cac | aat | 1 | C | A |
| TCGA-20-1686 | CSMD3                      | ENST00000297405     | p.T2293N | c.6878C>A | Unverified | ggc | acc | att | 2 | C | A |

|              |            |                 |          |            |            |     |     |     |   |   |   |
|--------------|------------|-----------------|----------|------------|------------|-----|-----|-----|---|---|---|
| TCGA-29-1784 | CSMD3      | ENST00000297405 | p.P3513H | c.10538C>A | Unverified | caa | ccc | atg | 2 | C | A |
| TCGA-24-1104 | CSMD3      | ENST00000297405 | p.G1705G | c.5115C>A  | Verified   | cca | ggc | aat | 3 | C | A |
| TCGA-24-2024 | CSMD3      | ENST00000297405 | p.I3171I | c.9513C>A  | Verified   | ata | atc | agt | 3 | C | A |
| TCGA-29-1781 | CSMD3_ENS  | ENST00000343508 | p.H2821N | c.8461C>A  | Unverified | GAT | CAC | AAT | 1 | C | A |
| TCGA-20-1686 | CSMD3_ENS  | ENST00000343508 | p.T2253N | c.6758C>A  | Unverified | GGC | ACC | ATT | 2 | C | A |
| TCGA-29-1784 | CSMD3_ENS  | ENST00000343508 | p.P3473H | c.10418C>A | Unverified | CAA | CCC | ATG | 2 | C | A |
| TCGA-09-0369 | CSN3       | ENST00000304954 | p.T60N   | c.179C>A   | Verified   | GGA | ACC | AAT | 2 | C | A |
| TCGA-09-0369 | CSN3       | ENST00000304954 | p.T60N   | c.179C>A   | Verified   | GGA | ACC | AAT | 2 | C | A |
| TCGA-36-1577 | CSRNP1     | ENST00000273153 | p.S124Y  | c.371C>A   | Unverified | TTC | TCT | TTG | 2 | C | A |
| TCGA-13-0887 | CTBP1      | ENST00000290921 | p.P308H  | c.923C>A   | Verified   | GCA | CCC | AAC | 2 | C | A |
| TCGA-23-2077 | CTCFL      | ENST00000243914 | p.D58E   | c.174C>A   | Verified   | cag | gac | agc | 3 | C | A |
| TCGA-13-0792 | CTNND2     | ENST00000304623 | p.P689H  | c.2066C>A  | Unverified | atc | ccc | cac | 2 | C | A |
| TCGA-30-1891 | CTSC       | ENST00000227266 | p.Y168*  | c.504C>A   | Unverified | CTC | TAC | AAG | 3 | C | A |
| TCGA-20-1685 | CUBN       | ENST00000377833 | p.N3396K | c.10188C>A | Unverified | TGC | AAC | AGA | 3 | C | A |
| TCGA-13-0923 | CUX1       | ENST00000292535 | p.P1055T | c.3163C>A  | Unverified | AGC | CCT | GCC | 1 | C | A |
| TCGA-61-2095 | CUX1       | ENST00000292535 | p.R1261R | c.3781C>A  | Unverified | AAA | CGA | GCG | 1 | C | A |
| TCGA-29-1762 | CXorf22    | NM_152632.1     | p.P537H  | c.1610C>A  | Unverified | ttg | cct | tcg | 2 | C | A |
| TCGA-29-1762 | CXorf22_EN | ENST00000297866 | p.P537H  | c.1610C>A  | Unverified | TTG | CCT | TCG | 2 | C | A |
| TCGA-24-1474 | CYB5D2     | ENST00000301391 | p.H236N  | c.706C>A   | Verified   | CCA | CAC | AGA | 1 | C | A |
| TCGA-13-1510 | CYGB       | ENST00000293230 | p.S75R   | c.225C>A   | Unverified | CGG | AGC | CCC | 3 | C | A |
| TCGA-23-1124 | CYP11A1    | ENST00000268053 | p.H388Q  | c.1164C>A  | Verified   | CTT | CAC | CCC | 3 | C | A |
| TCGA-61-2012 | CYP11B1    | ENST00000292427 | p.H109N  | c.325C>A   | Verified   | CCC | CAC | AGG | 1 | C | A |
| TCGA-13-0920 | CYP1A1     | ENST00000395048 | p.Q507K  | c.1519C>A  | Verified   | TTC | CAA | ATG | 1 | C | A |
| TCGA-29-1781 | CYP26B1    | ENST00000001146 | p.R76R   | c.226C>A   | Unverified | TCG | CGG | AGG | 1 | C | A |
| TCGA-09-2044 | CYP2A6     | ENST00000301141 | p.L219L  | c.657C>A   | Verified   | CAG | CTC | TAT | 3 | C | A |
| TCGA-13-0885 | CYP2J2     | ENST00000371204 | p.S490Y  | c.1469C>A  | Verified   | ATT | TCC | CCA | 2 | C | A |
| TCGA-24-1463 | CYP4A11    | ENST00000310638 | p.N427K  | c.1281C>A  | Verified   | CCC | AAC | CCA | 3 | C | A |
| TCGA-24-1847 | CYP4F22    | ENST00000269703 | p.H93Q   | c.279C>A   | Unverified | ATG | CAC | CAT | 3 | C | A |
| TCGA-04-1652 | CYP7B1     | ENST00000310193 | p.P54H   | c.161C>A   | Unverified | CTT | CCT | TAT | 2 | C | A |
| TCGA-04-1652 | CYP7B1     | ENST00000310193 | p.P54H   | c.161C>A   | Unverified | CTT | CCT | TAT | 2 | C | A |
| TCGA-24-1846 | CYTH3      | ENST00000350796 | p.Q132K  | c.394C>A   | Unverified | ctt | caa | gcc | 1 | C | A |
| TCGA-25-2391 | DAB1       | ENST00000371233 | p.P434H  | c.1301C>A  | Unverified | CAG | CCC | TCC | 2 | C | A |
| TCGA-13-0793 | DAXX       | ENST00000266000 | p.S534*  | c.1601C>A  | Verified   | ctg | tca | gaa | 2 | C | A |
| TCGA-10-0930 | DCAF5      | ENST00000341516 | p.P485P  | c.1455C>A  | Verified   | GGG | CCC | CTG | 3 | C | A |



|              |            |                 |          |            |            |     |     |     |   |   |   |
|--------------|------------|-----------------|----------|------------|------------|-----|-----|-----|---|---|---|
| TCGA-10-0930 | DCAF5      | ENST00000341516 | p.P485P  | c.1455C>A  | Verified   | GGG | CCC | CTG | 3 | C | A |
| TCGA-29-1781 | DCC        | ENST00000442544 | p.A431D  | c.1292C>A  | Unverified | TCG | GCT | CCC | 2 | C | A |
| TCGA-13-0904 | DCHS1      | ENST00000299441 | p.P1189T | c.3565C>A  | Verified   | AGC | CCA | CCC | 1 | C | A |
| TCGA-13-0924 | DCLRE1C    | ENST00000378246 | p.T102N  | c.305C>A   | Verified   | TTC | ACC | AAC | 2 | C | A |
| TCGA-13-0924 | DCLRE1C_EN | ENST00000378278 | p.T217N  | c.650C>A   | Verified   | TTC | ACC | AAC | 2 | C | A |
| TCGA-25-2393 | DCLRE1C_EN | ENST00000378278 | p.I87I   | c.261C>A   | Verified   | GAA | ATC | GAG | 3 | C | A |
| TCGA-25-1313 | DCPS       | ENST00000263579 | p.H279N  | c.835C>A   | Unverified | GTG | CAC | TTC | 1 | C | A |
| TCGA-24-1844 | DCTN1      | ENST00000361874 | p.L866M  | c.2596C>A  | Unverified | GCT | CTG | GAG | 1 | C | A |
| TCGA-61-1895 | DCTN2      | ENST00000434715 | p.L118M  | c.352C>A   | Unverified | GAG | CTG | ACA | 1 | C | A |
| TCGA-61-1895 | DCTN2_ENS  | ENST00000434715 | p.L118M  | c.352C>A   | Unverified | GAG | CTG | ACA | 1 | C | A |
| TCGA-13-0886 | DCUN1D3    | ENST00000324344 | p.Q188K  | c.562C>A   | Verified   | TTT | CAG | TTT | 1 | C | A |
| TCGA-24-1563 | DDC        | ENST00000357936 | p.D59E   | c.177C>A   | Verified   | AAC | GAC | GTT | 3 | C | A |
| TCGA-24-1469 | DDX21      | ENST00000354185 | p.P192T  | c.574C>A   | Verified   | ttt | ccc | ata | 1 | C | A |
| TCGA-04-1655 | DDX54      | ENST00000306014 | p.S530Y  | c.1589C>A  | Unverified | gag | tcc | atc | 2 | C | A |
| TCGA-29-1696 | DEF6       | ENST00000316637 | p.P573T  | c.1717C>A  | Unverified | CCC | CCT | CTG | 1 | C | A |
| TCGA-29-1696 | DEF6       | ENST00000316637 | p.P573T  | c.1717C>A  | Unverified | CCC | CCT | CTG | 1 | C | A |
| TCGA-13-0885 | DEFB115    | ENST00000400552 | p.P3T    | c.7C>A     | Verified   | CTG | CCA | GAT | 1 | C | A |
| TCGA-13-0923 | DEFB118    | ENST00000253381 | p.T91K   | c.272C>A   | Verified   | ACG | ACA | GAC | 2 | C | A |
| TCGA-09-2049 | DEFB129    | ENST00000246105 | p.T129T  | c.387C>A   | Verified   | GCC | ACC | ATC | 3 | C | A |
| TCGA-04-1336 | DENND2A    | ENST00000275884 | p.L762M  | c.2284C>A  | Verified   | TCC | CTG | CTT | 1 | C | A |
| TCGA-13-1489 | DENND2D    | ENST00000357640 | p.P73H   | c.218C>A   | Verified   | gag | cct | ata | 2 | C | A |
| TCGA-23-2078 | DGKD       | ENST00000264057 | p.H1156Q | c.3468C>A  | Unverified | gag | cac | ctc | 3 | C | A |
| TCGA-30-1857 | DHTKD1     | ENST00000263035 | p.T917N  | c.2750C>A  | Unverified | AAG | ACC | TTC | 2 | C | A |
| TCGA-29-1777 | DHX33      | ENST00000225296 | p.T430N  | c.1289C>A  | Unverified | atg | acc | gtg | 2 | C | A |
| TCGA-23-1031 | DIABLO     | ENST00000443649 | p.T182N  | c.545C>A   | Unverified | ata | acc | gcc | 2 | C | A |
| TCGA-04-1367 | DISP2      | ENST00000267889 | p.G1074G | c.3222C>A  | Verified   | GCA | GGC | GTG | 3 | C | A |
| TCGA-13-0923 | DLG5       | ENST00000372391 | p.S1508S | c.4524C>A  | Verified   | AAG | TCC | CAG | 3 | C | A |
| TCGA-24-2267 | DMD        | ENST00000378707 | p.L1104I | c.3310C>A  | Verified   | AAG | CTA | CTG | 1 | C | A |
| TCGA-24-2267 | DMD_ENSTC  | ENST00000378677 | p.L3560I | c.10678C>A | Verified   | AAG | CTA | CTG | 1 | C | A |
| TCGA-04-1542 | DMD_ENSTC  | ENST00000378677 | p.T633T  | c.1899C>A  | Verified   | GTG | ACC | CAG | 3 | C | A |
| TCGA-13-1488 | DMRT3      | ENST00000190165 | p.S382R  | c.1146C>A  | Verified   | TCG | AGC | CCC | 3 | C | A |
| TCGA-30-1857 | DMRTC2     | ENST00000269945 | p.P316H  | c.947C>A   | Unverified | CCC | CCC | AAC | 2 | C | A |
| TCGA-29-1693 | DMTF1      | ENST00000394703 | p.P603T  | c.1807C>A  | Unverified | GAG | CCT | CCA | 1 | C | A |
| TCGA-24-2289 | DMXL2      | ENST00000251076 | p.H1982Q | c.5946C>A  | Unverified | GAT | CAC | GAC | 3 | C | A |

|              |            |                 |          |            |            |     |     |     |   |   |   |
|--------------|------------|-----------------|----------|------------|------------|-----|-----|-----|---|---|---|
| TCGA-13-1481 | DNAAF1     | ENST00000378553 | p.P366T  | c.1096C>A  | Verified   | CCT | CCC | GGG | 1 | C | A |
| TCGA-09-2051 | DNAH1_ENS  | ENST00000420323 | p.L921I  | c.2761C>A  | Unverified | ATC | CTT | GGG | 1 | C | A |
| TCGA-04-1347 | DNAH10     | ENST00000339192 | p.A244D  | c.731C>A   | Verified   | GAA | GCC | AGG | 2 | C | A |
| TCGA-13-0760 | DNAH10     | ENST00000339192 | p.H666Q  | c.1998C>A  | Verified   | GTC | CAC | ACC | 3 | C | A |
| TCGA-24-2289 | DNAH11     | ENST00000328843 | p.N2211K | c.6633C>A  | Unverified | TTA | AAC | CCT | 3 | C | A |
| TCGA-29-1711 | DNAH17     | ENST00000300671 | p.N1811K | c.5433C>A  | Unverified | GGC | AAC | ACG | 3 | C | A |
| TCGA-29-1711 | DNAH17     | ENST00000300671 | p.N1811K | c.5433C>A  | Unverified | GGC | AAC | ACG | 3 | C | A |
| TCGA-24-2288 | DNAH3      | ENST00000261383 | p.P59T   | c.175C>A   | Unverified | CTG | CCT | CCT | 1 | C | A |
| TCGA-23-1029 | DNAH3      | ENST00000261383 | p.Y531*  | c.1593C>A  | Unverified | AAA | TAC | ATA | 3 | C | A |
| TCGA-24-2288 | DNAH3_ENS  | ENST00000261383 | p.P59T   | c.175C>A   | Unverified | CTG | CCT | CCT | 1 | C | A |
| TCGA-23-1029 | DNAH3_ENS  | ENST00000261383 | p.Y531*  | c.1593C>A  | Unverified | AAA | TAC | ATA | 3 | C | A |
| TCGA-61-1914 | DNAH6      | ENST00000237449 | p.L631I  | c.1891C>A  | Unverified | AGT | CTT | GAT | 1 | C | A |
| TCGA-29-1768 | DNAH7      | ENST00000312428 | p.T1429K | c.4286C>A  | Unverified | ATA | ACA | ATG | 2 | C | A |
| TCGA-24-2267 | DNAH9      | ENST00000262442 | p.T1700N | c.5099C>A  | Unverified | GTA | ACT | GCC | 2 | C | A |
| TCGA-61-1904 | DNAH9      | ENST00000262442 | p.F3792L | c.11376C>A | Unverified | GAG | TTC | CTC | 3 | C | A |
| TCGA-04-1367 | DNAJA4     | ENST00000343789 | p.D9E    | c.27C>A    | Unverified | TAT | GAC | ATC | 3 | C | A |
| TCGA-25-2392 | DNAJB11    | ENST00000439351 | p.T120N  | c.359C>A   | Verified   | gga | acc | cct | 2 | C | A |
| TCGA-23-1110 | DNASE2B_EI | ENST00000370665 | p.A7E    | c.20C>A    | Verified   | ATG | GCA | AGA | 2 | C | A |
| TCGA-61-1914 | DNHL1      | ENST00000314395 | p.L210I  | c.628C>A   | Unverified | AGT | CTT | GAT | 1 | C | A |
| TCGA-04-1338 | DNMBP      | ENST00000324109 | p.T246T  | c.738C>A   | Verified   | GGG | ACC | TAT | 3 | C | A |
| TCGA-24-1417 | DNTT       | ENST00000371174 | p.Q247K  | c.739C>A   | Unverified | TAT | CAA | TCC | 1 | C | A |
| TCGA-29-1777 | DOCK10     | ENST00000258390 | p.D1939E | c.5817C>A  | Unverified | TTG | GAC | CCC | 3 | C | A |
| TCGA-29-1777 | DOCK10_EN  | ENST00000373702 | p.D448E  | c.1344C>A  | Unverified | TTG | GAC | CCC | 3 | C | A |
| TCGA-29-1775 | DOCK3      | ENST00000266037 | p.L1710M | c.5128C>A  | Unverified | GAC | CTG | TAC | 1 | C | A |
| TCGA-29-1775 | DOCK3_ENS  | ENST00000266037 | p.L1710M | c.5128C>A  | Unverified | GAC | CTG | TAC | 1 | C | A |
| TCGA-04-1343 | DOCK3_ENS  | ENST00000266037 | p.T1185N | c.3554C>A  | Verified   | GAG | ACC | GGC | 2 | C | A |
| TCGA-30-1857 | DOCK4      | ENST00000342288 | p.H1409N | c.4225C>A  | Unverified | GTG | CTA | GAA | 1 | C | A |
| TCGA-30-1857 | DOCK4_ENS  | ENST00000437633 | p.H1412N | c.4234C>A  | Unverified | AAT | CAC | ATC | 1 | C | A |
| TCGA-25-1313 | DOCK6      | ENST00000319867 | p.A1992D | c.5975C>A  | Unverified | AAG | GCC | CTG | 2 | C | A |
| TCGA-30-1714 | DOK2       | ENST00000276420 | p.P280T  | c.838C>A   | Unverified | ccg | ccg | cct | 1 | C | A |
| TCGA-23-1031 | DPM1       | ENST00000371588 | p.R8S    | c.22C>A    | Verified   | AGT | CGT | AGT | 1 | C | A |
| TCGA-20-1686 | DPP3       | ENST00000360510 | p.A382D  | c.1145C>A  | Unverified | TTC | GCT | GGC | 2 | C | A |
| TCGA-61-1907 | DPYD       | ENST00000370192 | p.R394R  | c.1180C>A  | Unverified | CCA | CGG | AAG | 1 | C | A |
| TCGA-04-1542 | DRD1       | ENST00000329144 | p.L76M   | c.226C>A   | Verified   | GTC | CTG | GTC | 1 | C | A |

|              |            |                 |          |           |            |     |     |     |   |   |   |
|--------------|------------|-----------------|----------|-----------|------------|-----|-----|-----|---|---|---|
| TCGA-24-1103 | DRD3       | ENST00000383673 | p.A33D   | c.98C>A   | Verified   | TAT | GCC | CTC | 2 | C | A |
| TCGA-23-1117 | DSG3       | ENST00000257189 | p.S874Y  | c.2621C>A | Verified   | CCC | TCT | AAA | 2 | C | A |
| TCGA-23-1117 | DSG3       | ENST00000257189 | p.S874Y  | c.2621C>A | Verified   | CCC | TCT | AAA | 2 | C | A |
| TCGA-29-1763 | DSG3       | ENST00000257189 | p.L4L    | c.12C>A   | Unverified | GGG | CTC | TTC | 3 | C | A |
| TCGA-61-1895 | DSG4       | ENST00000308128 | p.Q1005K | c.3013C>A | Unverified | ATG | CAA | ATG | 1 | C | A |
| TCGA-61-1895 | DSG4_ENST0 | ENST00000359747 | p.Q1024K | c.3070C>A | Unverified | ATG | CAA | ATG | 1 | C | A |
| TCGA-29-1693 | DST        | ENST00000370765 | p.V2082V | c.6246C>A | Unverified | TCA | GTC | AGG | 3 | C | A |
| TCGA-29-1693 | DST_ENST0C | ENST00000370765 | p.V2082V | c.6246C>A | Unverified | TCA | GTC | AGG | 3 | C | A |
| TCGA-09-2049 | DST_ENST0C | ENST00000370769 | p.Q2278K | c.6832C>A | Verified   | GAC | CAG | TTT | 1 | C | A |
| TCGA-61-1737 | DSTYK_ENST | ENST00000367162 | p.Q218K  | c.652C>A  | Unverified | TTA | CAG | GAA | 1 | C | A |
| TCGA-30-1891 | DUSP27     | ENST00000361200 | p.T819T  | c.2457C>A | Unverified | GGG | ACC | AGC | 3 | C | A |
| TCGA-24-1423 | DUSP5      | ENST00000369583 | p.I317I  | c.951C>A  | Unverified | GAG | ATC | CTG | 3 | C | A |
| TCGA-29-1691 | EBF3       | ENST00000368648 | p.N100K  | c.300C>A  | Unverified | CCA | AAC | AAC | 3 | C | A |
| TCGA-29-1691 | EBF3_ENSTC | ENST00000355311 | p.N100K  | c.300C>A  | Unverified | CCA | AAC | AAC | 3 | C | A |
| TCGA-13-0762 | EDA        | ENST00000374552 | p.L62I   | c.184C>A  | Verified   | TAC | CTA | GAG | 1 | C | A |
| TCGA-13-0762 | EDA        | ENST00000374552 | p.L62I   | c.184C>A  | Verified   | TAC | CTA | GAG | 1 | C | A |
| TCGA-09-1674 | EDC4       | ENST00000358933 | p.S1042R | c.3126C>A | Unverified | CGC | AGC | ATA | 3 | C | A |
| TCGA-25-2400 | EDIL3      | ENST00000296591 | p.L162M  | c.484C>A  | Unverified | cca | ctg | gga | 1 | C | A |
| TCGA-23-1123 | EFCAB4B    | ENST00000252322 | p.L236L  | c.708C>A  | Verified   | CAT | CTC | TAT | 3 | C | A |
| TCGA-23-1123 | EFCAB4B    | ENST00000252322 | p.L236L  | c.708C>A  | Verified   | CAT | CTC | TAT | 3 | C | A |
| TCGA-23-2078 | EFHC2      | ENST00000333807 | p.N594K  | c.1782C>A | Verified   | gga | aac | ctt | 3 | C | A |
| TCGA-25-1326 | EIF2D      | ENST00000271764 | p.S361Y  | c.1082C>A | Verified   | CCC | TCC | CCG | 2 | C | A |
| TCGA-25-2042 | EIF3L      | ENST00000412331 | p.Q243K  | c.727C>A  | Unverified | CGA | CAG | TTG | 1 | C | A |
| TCGA-24-1846 | EIF4G2     | ENST00000339995 | p.H307N  | c.919C>A  | Unverified | GGA | CAG | ACA | 1 | C | A |
| TCGA-13-0923 | EIF5B      | ENST00000289371 | p.Q900K  | c.2698C>A | Verified   | ACT | CAG | ATT | 1 | C | A |
| TCGA-13-0904 | ELOVL3     | ENST00000370005 | p.H252N  | c.754C>A  | Verified   | GCC | CAC | TTC | 1 | C | A |
| TCGA-25-1326 | EMILIN1    | ENST00000380320 | p.L762I  | c.2284C>A | Unverified | GGG | CTC | CGG | 1 | C | A |
| TCGA-04-1331 | EMILIN2    | ENST00000254528 | p.T245K  | c.734C>A  | Verified   | GAA | ACG | GGC | 2 | C | A |
| TCGA-24-1435 | ENPP2      | ENST00000259486 | p.P840T  | c.2518C>A | Verified   | GGC | CCT | CTC | 1 | C | A |
| TCGA-30-1856 | ENPP2      | ENST00000259486 | p.A98A   | c.294C>A  | Unverified | ACA | GCC | CGT | 3 | C | A |
| TCGA-30-1856 | ENPP2_ENS  | ENST00000522826 | p.A98A   | c.294C>A  | Unverified | ACA | GCC | CGT | 3 | C | A |
| TCGA-23-1029 | ENSG00000  | ENST00000326071 | p.P332Q  | c.995C>A  | Unverified | CCC | CCA | GCC | 2 | C | A |
| TCGA-61-1740 | ENSG00000  | ENST00000398617 | p.P88T   | c.262C>A  | Unverified | AAC | CCT | ATG | 1 | C | A |
| TCGA-24-1103 | ENSG00000  | ENST00000402465 | p.T26K   | c.77C>A   | Verified   | GAC | ACA | TCC | 2 | C | A |

|              |            |                 |          |           |            |     |     |     |   |   |   |
|--------------|------------|-----------------|----------|-----------|------------|-----|-----|-----|---|---|---|
| TCGA-29-1711 | ENSG000001 | ENST00000596508 | p.P108H  | c.323C>A  | Unverified | GCC | CCC | TGG | 2 | C | A |
| TCGA-29-1711 | ENSG000001 | ENST00000596508 | p.P108H  | c.323C>A  | Unverified | GCC | CCC | TGG | 2 | C | A |
| TCGA-23-1114 | EPB42      | ENST00000300215 | p.T105T  | c.315C>A  | Unverified | AGG | ACC | CAA | 3 | C | A |
| TCGA-24-1423 | EPC1       | ENST00000263062 | p.L361M  | c.1081C>A | Verified   | GCA | CTG | CCA | 1 | C | A |
| TCGA-61-2109 | EPHB1      | ENST00000398015 | p.T117N  | c.350C>A  | Unverified | GAG | ACT | GAC | 2 | C | A |
| TCGA-61-2109 | EPHB1_ENS  | ENST00000398015 | p.T117N  | c.350C>A  | Unverified | GAG | ACT | GAC | 2 | C | A |
| TCGA-13-1489 | EPHB2      | NM_017449       | p.G986G  | c.2958C>A | Verified   | gag | ggc | cag | 3 | C | A |
| TCGA-24-2288 | EPHB3      | ENST00000330394 | p.P74H   | c.221C>A  | Unverified | aat | ccc | atc | 2 | C | A |
| TCGA-61-2113 | EPHB4      | ENST00000358173 | p.G82G   | c.246C>A  | Unverified | CGG | GGC | GCC | 3 | C | A |
| TCGA-13-1497 | EPS8       | ENST00000281172 | p.P9H    | c.26C>A   | Verified   | CAT | CCC | AGT | 2 | C | A |
| TCGA-61-2009 | EPX        | ENST00000225371 | p.Q662K  | c.1984C>A | Verified   | AGA | CAG | CGC | 1 | C | A |
| TCGA-09-1674 | ERN1       | ENST00000433197 | p.A868D  | c.2603C>A | Unverified | AGA | GCC | GTG | 2 | C | A |
| TCGA-09-1674 | ERN1_ENST  | ENST00000433197 | p.A868D  | c.2603C>A | Unverified | AGA | GCC | GTG | 2 | C | A |
| TCGA-29-1693 | ETFDH      | ENST00000511912 | p.P545T  | c.1633C>A | Unverified | ATA | CCT | GTA | 1 | C | A |
| TCGA-29-1703 | ETV4_ENST  | ENST00000319349 | p.P173H  | c.518C>A  | Unverified | CAC | CCT | GGC | 2 | C | A |
| TCGA-13-0887 | ETV7       | ENST00000340181 | p.L90I   | c.268C>A  | Verified   | ATC | CTC | ACC | 1 | C | A |
| TCGA-04-1361 | EVI5       | ENST00000370331 | p.P770T  | c.2308C>A | Verified   | gac | ccc | gca | 1 | C | A |
| TCGA-04-1361 | EVI5       | ENST00000370331 | p.P770T  | c.2308C>A | Verified   | gac | ccc | gca | 1 | C | A |
| TCGA-09-2049 | EVX2       | ENST00000308618 | p.Y263*  | c.789C>A  | Verified   | ACC | TAC | ATG | 3 | C | A |
| TCGA-13-0920 | EXOC4      | ENST00000253861 | p.A6D    | c.17C>A   | Verified   | GCA | GCT | GGT | 2 | C | A |
| TCGA-04-1347 | EYA3       | ENST00000373871 | p.T112N  | c.335C>A  | Verified   | GCA | ACC | CAA | 2 | C | A |
| TCGA-61-1998 | FADS3      | ENST00000278829 | p.S358R  | c.1074C>A | Verified   | GTC | AGC | TCT | 3 | C | A |
| TCGA-61-1740 | FAHD2B     | ENST00000272610 | p.Q251K  | c.751C>A  | Unverified | AAC | CAG | ATG | 1 | C | A |
| TCGA-61-1910 | FAM115A    | ENST00000355951 | p.S121S  | c.363C>A  | Unverified | GAC | TCC | CTG | 3 | C | A |
| TCGA-13-1498 | FAM123A    | ENST00000357816 | p.G534G  | c.1602C>A | Verified   | CGG | GGC | TTG | 3 | C | A |
| TCGA-29-1784 | FAM126A    | ENST00000432176 | p.C100*  | c.300C>A  | Unverified | GGA | TGC | ATT | 3 | C | A |
| TCGA-23-1021 | FAM129A    | ENST00000367511 | p.P728T  | c.2182C>A | Verified   | GCT | CCA | GTG | 1 | C | A |
| TCGA-29-1764 | FAM129A    | ENST00000367511 | p.P663T  | c.1987C>A | Unverified | GAC | CCC | GTG | 1 | C | A |
| TCGA-30-1855 | FAM135B    | ENST00000395297 | p.Q954K  | c.2860C>A | Unverified | CAG | CAA | AGC | 1 | C | A |
| TCGA-24-2280 | FAM135B    | ENST00000395297 | p.L1402L | c.4206C>A | Unverified | GGA | CTC | AAC | 3 | C | A |
| TCGA-61-2094 | FAM135B    | ENST00000395297 | p.G1351G | c.4053C>A | Unverified | CTG | GGC | CCT | 3 | C | A |
| TCGA-61-2008 | FAM179A    | ENST00000379558 | p.S356Y  | c.1067C>A | Verified   | AAG | TCT | GCC | 2 | C | A |
| TCGA-23-1124 | FAM187B    | ENST00000324675 | p.H50Q   | c.150C>A  | Verified   | GCG | CAC | TGG | 3 | C | A |
| TCGA-13-0900 | FAM47B     | ENST00000329357 | p.L374I  | c.1120C>A | Verified   | GAA | CTC | ACC | 1 | C | A |

|              |            |                     |          |            |            |     |     |     |   |   |   |
|--------------|------------|---------------------|----------|------------|------------|-----|-----|-----|---|---|---|
| TCGA-29-1775 | FAM65A_EN  | ENST00000379312     | p.S35R   | c.105C>A   | Unverified | CCC | AGC | CTC | 3 | C | A |
| TCGA-29-2427 | FAM73A     | ENST00000370791     | p.A32D   | c.95C>A    | Verified   | GGA | GCC | ATG | 2 | C | A |
| TCGA-24-1422 | FAM83C     | ENST00000374408     | p.T674T  | c.2022C>A  | Verified   | CTA | ACC | CTG | 3 | C | A |
| TCGA-25-1326 | FAM84B     | ENST00000304916     | p.P296T  | c.886C>A   | Unverified | CCC | CCT | GCG | 1 | C | A |
| TCGA-61-2095 | FANCC_ENS  | ENST00000289081     | p.L450M  | c.1348C>A  | Unverified | GTG | CTG | GGC | 1 | C | A |
| TCGA-09-2049 | FAP        | ENST00000188790     | p.T741K  | c.2222C>A  | Verified   | TCC | ACG | AAC | 2 | C | A |
| TCGA-29-1696 | FASTKD5    | ENST00000380266     | p.S762Y  | c.2285C>A  | Unverified | ACC | TCT | GCT | 2 | C | A |
| TCGA-29-1696 | FASTKD5    | ENST00000380266     | p.S762Y  | c.2285C>A  | Unverified | ACC | TCT | GCT | 2 | C | A |
| TCGA-20-1686 | FAT        | ENST00000441802     | p.P4453P | c.13359C>A | Unverified | CCG | CCC | GAA | 3 | C | A |
| TCGA-10-0930 | FAT1       | ENST00000441802     | p.P4393H | c.13178C>A | Verified   | GTT | CCT | CTG | 2 | C | A |
| TCGA-10-0930 | FAT1       | ENST00000441802     | p.P4393H | c.13178C>A | Verified   | GTT | CCT | CTG | 2 | C | A |
| TCGA-20-1686 | FAT1       | ENST00000441802     | p.P4453P | c.13359C>A | Unverified | CCG | CCC | GAA | 3 | C | A |
| TCGA-25-1313 | FAT2       | ENST00000261800     | p.P2951P | c.8853C>A  | Verified   | GAC | CCC | CTG | 3 | C | A |
| TCGA-29-1763 | FAT3_ENSTC | ENST00000298047_v61 | p.Q4229K | c.12685C>A | Unverified | CCG | CAG | GTC | 1 | C | A |
| TCGA-23-1021 | FAT3_ENSTC | ENST00000298047_v61 | p.A3313A | c.9939C>A  | Verified   | GAA | GCC | AAA | 3 | C | A |
| TCGA-24-1431 | FAT3_ENSTC | ENST00000298047_v61 | p.Y1259* | c.3777C>A  | Verified   | GTC | TAC | CAG | 3 | C | A |
| TCGA-29-1763 | FAT3_ENSTC | ENST00000409404     | p.Q4229K | c.12685C>A | Unverified | CCG | CAG | GTC | 1 | C | A |
| TCGA-13-1505 | FAT4       | ENST00000330166     | p.I3413I | c.10239C>A | Verified   | CAG | ATC | AGT | 3 | C | A |
| TCGA-13-1505 | FAT4_ENSTC | ENST00000394329     | p.I3413I | c.10239C>A | Verified   | CAG | ATC | AGT | 3 | C | A |
| TCGA-23-1117 | FBLN2      | ENST00000404922     | p.A567E  | c.1700C>A  | Verified   | CCT | GCG | CAT | 2 | C | A |
| TCGA-23-1117 | FBLN2      | ENST00000404922     | p.A567E  | c.1700C>A  | Verified   | CCT | GCG | CAT | 2 | C | A |
| TCGA-23-1117 | FBLN2_ENST | ENST00000492059     | p.A1148E | c.3443C>A  | Verified   | CCT | GCG | CAT | 2 | C | A |
| TCGA-23-1117 | FBLN2_ENST | ENST00000492059     | p.A1148E | c.3443C>A  | Verified   | CCT | GCG | CAT | 2 | C | A |
| TCGA-24-2289 | FBXL20     | ENST00000583610     | p.S371Y  | c.1112C>A  | Unverified | gca | tcc | ctg | 2 | C | A |
| TCGA-13-0906 | FBXO25     | ENST00000276326     | p.A347D  | c.1040C>A  | Unverified | gcg | gcc | gac | 2 | C | A |
| TCGA-61-2113 | FBXO34     | ENST00000313833     | p.L317I  | c.949C>A   | Unverified | ttg | ctt | gca | 1 | C | A |
| TCGA-29-1769 | FBXO38     | ENST00000340253     | p.T256K  | c.767C>A   | Unverified | gta | aca | ggc | 2 | C | A |
| TCGA-24-0979 | FBXO39     | ENST00000321535     | p.N168K  | c.504C>A   | Verified   | CTC | AAC | CTA | 3 | C | A |
| TCGA-24-1423 | FBXO40     | ENST00000338040     | p.P678T  | c.2032C>A  | Verified   | GAC | CCG | ATT | 1 | C | A |
| TCGA-29-1764 | FBXW7_NM   | ENST00000263981     | p.S11R   | c.33C>A    | Unverified | ctg | agc | tgc | 3 | C | A |
| TCGA-04-1542 | FEZ2       | ENST00000405912     | p.Y235*  | c.705C>A   | Verified   | GAG | TAC | TCT | 3 | C | A |
| TCGA-25-2401 | FGA        | ENST00000302053     | p.P565H  | c.1694C>A  | Verified   | CAC | CCT | GGG | 2 | C | A |
| TCGA-24-1845 | FGA        | ENST00000302053     | p.S756S  | c.2268C>A  | Unverified | GTC | TCC | TCC | 3 | C | A |
| TCGA-29-1785 | FGA        | ENST00000302053     | p.D789E  | c.2367C>A  | Unverified | TTT | GAC | AGG | 3 | C | A |

|              |                        |                 |          |           |            |     |     |     |   |   |   |
|--------------|------------------------|-----------------|----------|-----------|------------|-----|-----|-----|---|---|---|
| TCGA-29-1785 | FGA                    | ENST00000302053 | p.D789E  | c.2367C>A | Unverified | TTT | GAC | AGG | 3 | C | A |
| TCGA-04-1338 | FGD6                   | ENST00000343958 | p.P855H  | c.2564C>A | Verified   | GAG | CCT | GAC | 2 | C | A |
| TCGA-30-1855 | FGF4                   | ENST00000168712 | p.P204T  | c.610C>A  | Unverified | ctc | ccc | agg | 1 | C | A |
| TCGA-30-1714 | FHOD3                  | ENST00000257209 | p.A602D  | c.1805C>A | Unverified | ATA | GCC | TCT | 2 | C | A |
| TCGA-29-2427 | FIGN                   | ENST00000333129 | p.P441T  | c.1321C>A | Verified   | CAC | CCA | ATG | 1 | C | A |
| TCGA-30-1714 | FIGN                   | ENST00000333129 | p.A36D   | c.107C>A  | Unverified | CCT | GCC | CAC | 2 | C | A |
| TCGA-24-1850 | FLG                    | ENST00000368799 | p.S1592Y | c.4775C>A | Unverified | GGA | TCC | AGT | 2 | C | A |
| TCGA-13-0920 | FLG2                   | ENST00000388718 | p.Q796K  | c.2386C>A | Verified   | GGA | CAA | CAT | 1 | C | A |
| TCGA-25-1313 | FLG2                   | ENST00000388718 | p.H2196N | c.6586C>A | Verified   | ACA | CAT | TCA | 1 | C | A |
| TCGA-29-1696 | FLG2                   | ENST00000388718 | p.S2315Y | c.6944C>A | Unverified | CAA | TCC | ACA | 2 | C | A |
| TCGA-29-1696 | FLG2                   | ENST00000388718 | p.S2315Y | c.6944C>A | Unverified | CAA | TCC | ACA | 2 | C | A |
| TCGA-61-1904 | FLNC                   | ENST00000325888 | p.S1780Y | c.5339C>A | Unverified | GAG | TCC | ATG | 2 | C | A |
| TCGA-04-1530 | FLVCR2                 | ENST00000238667 | p.I451I  | c.1353C>A | Unverified | GGG | ATC | ATC | 3 | C | A |
| TCGA-23-1123 | FMN2                   | ENST00000319653 | p.Q952K  | c.2854C>A | Verified   | TCA | CAG | CCT | 1 | C | A |
| TCGA-23-1123 | FMN2                   | ENST00000319653 | p.Q952K  | c.2854C>A | Verified   | TCA | CAG | CCT | 1 | C | A |
| TCGA-23-1032 | FMNL2                  | ENST00000288670 | p.P558P  | c.1674C>A | Unverified | CCG | CCC | CCT | 3 | C | A |
| TCGA-29-1762 | FN1                    | ENST00000336916 | p.D2300E | c.6900C>A | Unverified | TGT | GAC | AAC | 3 | C | A |
| TCGA-29-1762 | FN1_ENST00000354785    | ENST00000354785 | p.D2422E | c.7266C>A | Unverified | TGT | GAC | AAC | 3 | C | A |
| TCGA-61-1737 | FOSB                   | ENST00000353609 | p.Q325K  | c.973C>A  | Unverified | GAC | CAG | CCT | 1 | C | A |
| TCGA-61-1904 | FOXO1                  | ENST00000379561 | p.S290*  | c.869C>A  | Unverified | GGA | TCA | CAG | 2 | C | A |
| TCGA-61-1904 | FOXO1_ENST00000379561  | ENST00000379561 | p.S290*  | c.869C>A  | Unverified | GGA | TCA | CAG | 2 | C | A |
| TCGA-20-0990 | FREM2                  | ENST00000280481 | p.A2972A | c.8916C>A | Verified   | AAT | GCC | AAA | 3 | C | A |
| TCGA-24-1423 | FREM2                  | ENST00000280481 | p.D750E  | c.2250C>A | Verified   | ACA | GAC | GAA | 3 | C | A |
| TCGA-61-2095 | FRG2                   | ENST00000378763 | p.P201T  | c.601C>A  | Unverified | TCT | CCA | CTT | 1 | C | A |
| TCGA-04-1338 | FRMD4B                 | ENST00000264546 | p.Q422K  | c.1264C>A | Verified   | CCT | CAG | GTC | 1 | C | A |
| TCGA-24-2288 | FRMPD2                 | ENST00000374201 | p.R1053S | c.3157C>A | Unverified | GAA | CGC | ACG | 1 | C | A |
| TCGA-29-1769 | FRMPD3                 | XM_042978.4     | p.G1285G | c.3855C>A | Unverified | gaa | ggc | cct | 3 | C | A |
| TCGA-29-1769 | FRMPD3_ENST00000276185 | ENST00000276185 | p.G1236G | c.3708C>A | Unverified | GAA | GGC | CCT | 3 | C | A |
| TCGA-23-1110 | FRMPD4                 | ENST00000380682 | p.P965Q  | c.2894C>A | Verified   | cct | cca | aag | 2 | C | A |
| TCGA-24-1844 | FRY                    | ENST00000380250 | p.L791I  | c.2371C>A | Unverified | CAG | CTA | AGT | 1 | C | A |
| TCGA-23-1124 | FRZB                   | ENST00000295113 | p.A115D  | c.344C>A  | Verified   | CGG | GCC | CGG | 2 | C | A |
| TCGA-13-0924 | FSHR                   | ENST00000406846 | p.N632K  | c.1896C>A | Verified   | AAA | AAC | TTT | 3 | C | A |
| TCGA-23-1022 | FSIP1                  | ENST00000350221 | p.S156Y  | c.467C>A  | Verified   | AAG | TCT | GCA | 2 | C | A |
| TCGA-25-2392 | FSTL5                  | ENST00000306100 | p.S305Y  | c.914C>A  | Unverified | GGG | TCC | TTG | 2 | C | A |

|              |                     |                 |         |           |            |     |     |     |   |   |   |
|--------------|---------------------|-----------------|---------|-----------|------------|-----|-----|-----|---|---|---|
| TCGA-13-0923 | FUBP3               | ENST00000319725 | p.A417D | c.1250C>A | Verified   | GTG | GCC | AGG | 2 | C | A |
| TCGA-24-2024 | GAA                 | ENST00000390015 | p.S918Y | c.2753C>A | Verified   | CTC | TCC | AAC | 2 | C | A |
| TCGA-13-1498 | GABRG2              | ENST00000356592 | p.S256S | c.768C>A  | Verified   | ACT | TCC | GGA | 3 | C | A |
| TCGA-23-1022 | GABRG2              | ENST00000356592 | p.T165T | c.495C>A  | Verified   | ACC | ACC | CCC | 3 | C | A |
| TCGA-36-1577 | GADD45GIP           | ENST00000316939 | p.A122E | c.365C>A  | Unverified | ATC | GCA | GAG | 2 | C | A |
| TCGA-29-1691 | GALE                | ENST00000374497 | p.L127M | c.379C>A  | Unverified | AAC | CTG | GTG | 1 | C | A |
| TCGA-13-0916 | GALNT13             | ENST00000392825 | p.L414I | c.1240C>A | Verified   | TAC | CTA | GAA | 1 | C | A |
| TCGA-61-1910 | GALNTL2             | ENST00000339732 | p.I526I | c.1578C>A | Unverified | GAC | ATC | CTG | 3 | C | A |
| TCGA-04-1338 | GAS2                | ENST00000454584 | p.L67I  | c.199C>A  | Verified   | ttg | ctc | tgt | 1 | C | A |
| TCGA-61-2012 | GBP6                | ENST00000370456 | p.T98N  | c.293C>A  | Verified   | GAC | ACC | GAA | 2 | C | A |
| TCGA-04-1651 | GDF3                | ENST00000329913 | p.L234M | c.700C>A  | Unverified | ctg | ctg | gtg | 1 | C | A |
| TCGA-04-1651 | GDF3                | ENST00000329913 | p.L234M | c.700C>A  | Unverified | ctg | ctg | gtg | 1 | C | A |
| TCGA-61-2012 | GDF3                | ENST00000329913 | p.L2I   | c.4C>A    | Verified   | atg | ctt | cgt | 1 | C | A |
| TCGA-29-1763 | GGT7                | ENST00000336431 | p.L461L | c.1383C>A | Unverified | CCA | CTC | CTG | 3 | C | A |
| TCGA-24-1423 | GH2_ENST00000456543 | ENST00000456543 | p.T177K | c.530C>A  | Unverified | ACA | ACG | ATG | 2 | C | A |
| TCGA-24-1563 | GIGYF2              | ENST00000373563 | p.Y538* | c.1614C>A | Verified   | TAT | TAC | AAA | 3 | C | A |
| TCGA-10-0930 | GIMAP6              | ENST00000328902 | p.L212M | c.634C>A  | Verified   | CAA | CTG | CGA | 1 | C | A |
| TCGA-10-0930 | GIMAP6              | ENST00000328902 | p.L212M | c.634C>A  | Verified   | CAA | CTG | CGA | 1 | C | A |
| TCGA-25-2400 | GJA1                | ENST00000282561 | p.D360E | c.1080C>A | Verified   | GTG | GAC | CAG | 3 | C | A |
| TCGA-13-1510 | GLI1                | ENST00000228682 | p.D647E | c.1941C>A | Unverified | gct | gac | cgt | 3 | C | A |
| TCGA-23-1124 | GLS2                | ENST00000311966 | p.D550E | c.1650C>A | Verified   | AAG | GAC | AGG | 3 | C | A |
| TCGA-25-2401 | GNA11               | ENST00000078429 | p.Y235* | c.705C>A  | Unverified | GAA | TAC | GAC | 3 | C | A |
| TCGA-61-1907 | GNB4                | ENST00000232564 | p.Q75K  | c.223C>A  | Unverified | tct | caa | gat | 1 | C | A |
| TCGA-36-1577 | GOLIM4              | ENST00000470487 | p.A389E | c.1166C>A | Unverified | CAC | GCG | CGT | 2 | C | A |
| TCGA-61-1910 | GPC5                | ENST00000377067 | p.S93R  | c.279C>A  | Unverified | TCC | AGC | TCT | 3 | C | A |
| TCGA-09-1674 | GPD1                | ENST00000301149 | p.I199I | c.597C>A  | Unverified | GAG | ATC | TGT | 3 | C | A |
| TCGA-61-1906 | GPD2                | ENST00000310454 | p.P320H | c.959C>A  | Unverified | ATG | CCT | GGT | 2 | C | A |
| TCGA-61-1906 | GPD2                | ENST00000310454 | p.P320H | c.959C>A  | Unverified | ATG | CCT | GGT | 2 | C | A |
| TCGA-09-2050 | GPR119              | ENST00000276218 | p.Q198K | c.592C>A  | Verified   | cag | cag | att | 1 | C | A |
| TCGA-24-1843 | GPR137C             | ENST00000321662 | p.T200N | c.599C>A  | Unverified | TGG | ACT | GTG | 2 | C | A |
| TCGA-13-1497 | GPR149              | ENST00000389740 | p.I314I | c.942C>A  | Verified   | TTG | ATC | CTA | 3 | C | A |
| TCGA-09-2049 | GPR15               | ENST00000284311 | p.T338N | c.1013C>A | Verified   | CTC | ACT | AAG | 2 | C | A |
| TCGA-23-1031 | GPR176              | ENST00000561100 | p.P424T | c.1270C>A | Verified   | CCA | CCC | CTG | 1 | C | A |
| TCGA-13-0760 | GPR83               | ENST00000243673 | p.T403T | c.1209C>A | Verified   | CCC | ACC | TCC | 3 | C | A |

|              |            |                     |          |           |            |     |     |     |   |   |   |
|--------------|------------|---------------------|----------|-----------|------------|-----|-----|-----|---|---|---|
| TCGA-61-1740 | GPRC6A     | ENST00000310357     | p.P737T  | c.2209C>A | Unverified | TTG | CCC | AGA | 1 | C | A |
| TCGA-25-2392 | GPRIN1     | ENST00000303991     | p.S82S   | c.246C>A  | Verified   | GCC | TCC | TGC | 3 | C | A |
| TCGA-04-1343 | GRIA4      | ENST00000282499     | p.P384H  | c.1151C>A | Verified   | GGA | CCT | AGA | 2 | C | A |
| TCGA-24-1844 | GRIK1      | ENST00000389125     | p.S739Y  | c.2216C>A | Unverified | GAG | TCC | ACC | 2 | C | A |
| TCGA-24-1844 | GRIK1_ENST | ENST00000399907     | p.S754Y  | c.2261C>A | Unverified | GAG | TCC | ACC | 2 | C | A |
| TCGA-61-1737 | GRIN2B     | ENST00000279593     | p.T475N  | c.1424C>A | Unverified | TTC | ACC | TAT | 2 | C | A |
| TCGA-13-1510 | GRIN2B     | ENST00000279593     | p.S130S  | c.390C>A  | Unverified | GGC | TCC | TCT | 3 | C | A |
| TCGA-23-1124 | GRIP1      | ENST00000398016     | p.S303S  | c.909C>A  | Verified   | CTC | TCC | ATC | 3 | C | A |
| TCGA-04-1337 | GRLF1_ENST | ENST00000317082_v61 | p.T409T  | c.1227C>A | Verified   | GAT | ACC | GTC | 3 | C | A |
| TCGA-10-0930 | GRM7       | ENST00000389335     | p.F122L  | c.366C>A  | Verified   | ACT | TTC | GTC | 3 | C | A |
| TCGA-10-0930 | GRM7       | ENST00000389335     | p.F122L  | c.366C>A  | Verified   | ACT | TTC | GTC | 3 | C | A |
| TCGA-13-0795 | GRM8       | ENST00000339582     | p.P643T  | c.1927C>A | Verified   | GCA | CCA | GAT | 1 | C | A |
| TCGA-29-1696 | GSDMC      | ENST00000276708     | p.L117L  | c.351C>A  | Unverified | TCC | CTC | GAG | 3 | C | A |
| TCGA-29-1696 | GSDMC      | ENST00000276708     | p.L117L  | c.351C>A  | Unverified | TCC | CTC | GAG | 3 | C | A |
| TCGA-23-2078 | GTF2IRD1   | ENST00000265755     | p.P852H  | c.2555C>A | Unverified | AAC | CCC | AAC | 2 | C | A |
| TCGA-29-1693 | GUCA1B     | ENST00000230361     | p.L94M   | c.280C>A  | Unverified | AAG | CTG | AAG | 1 | C | A |
| TCGA-20-1686 | GYG1       | ENST00000345003     | p.D279E  | c.837C>A  | Unverified | TCA | GAC | TTG | 3 | C | A |
| TCGA-25-2392 | GZMH       | ENST00000216338     | p.P90H   | c.269C>A  | Verified   | ATC | CCT | GTG | 2 | C | A |
| TCGA-20-1685 | H3F3C      | ENST00000340398     | p.F78L   | c.234C>A  | Unverified | GAT | TTC | AAC | 3 | C | A |
| TCGA-09-1665 | HACE1      | ENST00000262903     | p.H252N  | c.754C>A  | Verified   | TAT | CAC | CCG | 1 | C | A |
| TCGA-61-1907 | HAPLN2     | ENST00000255039     | p.Y66*   | c.198C>A  | Unverified | AGC | TAC | AAG | 3 | C | A |
| TCGA-29-1775 | HAUS3      | ENST00000243706     | p.Q410K  | c.1228C>A | Unverified | GTT | CAA | GAA | 1 | C | A |
| TCGA-09-2049 | HBXIP      | ENST00000256644     | p.H169N  | c.505C>A  | Verified   | GTG | CAC | AAA | 1 | C | A |
| TCGA-04-1356 | HCN4       | ENST00000261917     | p.P618T  | c.1852C>A | Verified   | CAG | CCT | GGG | 1 | C | A |
| TCGA-13-0885 | HCRTR2     | ENST00000370862     | p.T205T  | c.615C>A  | Verified   | ACC | ACC | CTC | 3 | C | A |
| TCGA-13-1501 | HEATR5B    | ENST00000233099     | p.S1237* | c.3710C>A | Verified   | AAA | TCA | AAG | 2 | C | A |
| TCGA-13-1501 | HEATR5B    | ENST00000233099     | p.S1237* | c.3710C>A | Verified   | AAA | TCA | AAG | 2 | C | A |
| TCGA-04-1331 | HEATR7B2   | ENST00000399564     | p.T456N  | c.1367C>A | Verified   | CTG | ACT | TTT | 2 | C | A |
| TCGA-29-1764 | HECTD1     | ENST00000399332     | p.P50T   | c.148C>A  | Unverified | CCT | CCT | CGC | 1 | C | A |
| TCGA-61-1900 | HECW1      | ENST00000395891     | p.Y1223* | c.3669C>A | Unverified | CCC | TAC | CGA | 3 | C | A |
| TCGA-61-1900 | HECW1_ENST | ENST00000395891     | p.Y1223* | c.3669C>A | Unverified | CCC | TAC | CGA | 3 | C | A |
| TCGA-24-1845 | HEG1       | ENST00000311127     | p.L1163I | c.3487C>A | Unverified | CAG | CTC | TTG | 1 | C | A |
| TCGA-24-1470 | HEG1       | ENST00000311127     | p.I530I  | c.1590C>A | Verified   | TCG | ATC | GCT | 3 | C | A |
| TCGA-24-2289 | HEPH       | NM_138737.1         | p.P748H  | c.2243C>A | Unverified | tgc | cct | gac | 2 | C | A |



|              |            |                 |          |           |            |     |     |     |   |   |   |
|--------------|------------|-----------------|----------|-----------|------------|-----|-----|-----|---|---|---|
| TCGA-25-2042 | HFE        | ENST00000357618 | p.Y135*  | c.405C>A  | Unverified | GGC | TAC | TGG | 3 | C | A |
| TCGA-29-2427 | HHATL      | ENST00000310417 | p.L347I  | c.1039C>A | Verified   | TGG | CTT | TGC | 1 | C | A |
| TCGA-20-0991 | HIPK1      | NM_152696       | p.A78D   | c.233C>A  | Verified   | cca | gct | cct | 2 | C | A |
| TCGA-29-1711 | HIPK2      | NM_022740       | p.D383E  | c.1149C>A | Unverified | att | gac | atg | 3 | C | A |
| TCGA-29-1711 | HIPK2      | NM_022740       | p.D383E  | c.1149C>A | Unverified | att | gac | atg | 3 | C | A |
| TCGA-29-1711 | HIPK2_ENST | ENST00000406875 | p.D383E  | c.1149C>A | Unverified | ATT | GAC | ATG | 3 | C | A |
| TCGA-29-1711 | HIPK2_ENST | ENST00000406875 | p.D383E  | c.1149C>A | Unverified | ATT | GAC | ATG | 3 | C | A |
| TCGA-09-1674 | HIST1H1E   | ENST00000304218 | p.A61D   | c.182C>A  | Unverified | GCC | GCT | CTC | 2 | C | A |
| TCGA-29-1784 | HIST1H2AM  | ENST00000359611 | p.A87A   | c.261C>A  | Unverified | CTG | GCC | ATC | 3 | C | A |
| TCGA-29-1766 | HIST1H4K   | ENST00000357549 | p.T83N   | c.248C>A  | Unverified | GTC | ACC | GCC | 2 | C | A |
| TCGA-13-1489 | HIST2H2AB  | ENST00000331128 | p.V101V  | c.303C>A  | Verified   | GGT | GTC | ACC | 3 | C | A |
| TCGA-09-2044 | HLCS       | ENST00000399120 | p.N156K  | c.468C>A  | Verified   | GTC | AAC | CTC | 3 | C | A |
| TCGA-04-1638 | HMCN1      | ENST00000271588 | p.Q2713K | c.8137C>A | Unverified | GGA | CAG | CCC | 1 | C | A |
| TCGA-24-1469 | HMGCLL1    | ENST00000398661 | p.S187S  | c.561C>A  | Verified   | TGT | TCC | ATT | 3 | C | A |
| TCGA-09-2056 | HOXA1      | ENST00000343060 | p.A185A  | c.555C>A  | Verified   | CAC | GCC | AGC | 3 | C | A |
| TCGA-25-1326 | HOXC6      | ENST00000243108 | p.S76Y   | c.227C>A  | Verified   | AAT | TCC | TTT | 2 | C | A |
| TCGA-04-1347 | HS3ST5     | ENST00000312719 | p.L47M   | c.139C>A  | Verified   | CGA | CTG | GGT | 1 | C | A |
| TCGA-29-1696 | HSPA1B     | ENST00000375650 | p.T636N  | c.1907C>A | Unverified | CCT | ACC | ATT | 2 | C | A |
| TCGA-29-1696 | HSPA1B     | ENST00000375650 | p.T636N  | c.1907C>A | Unverified | CCT | ACC | ATT | 2 | C | A |
| TCGA-23-1032 | HSPA1L     | ENST00000375654 | p.P438P  | c.1314C>A | Verified   | CAA | CCC | GGG | 3 | C | A |
| TCGA-13-0885 | HSPB2      | ENST00000304298 | p.R131R  | c.391C>A  | Verified   | tgg | cga | gtc | 1 | C | A |
| TCGA-13-0884 | HSPG2      | ENST00000374695 | p.Q1062K | c.3184C>A | Verified   | GAG | CAA | GCA | 1 | C | A |
| TCGA-29-1705 | HTATIP2    | ENST00000421577 | p.L7M    | c.19C>A   | Unverified | GCC | CTG | TCG | 1 | C | A |
| TCGA-29-1705 | HTATIP2_EN | ENST00000419348 | p.L41M   | c.121C>A  | Unverified | GCC | CTG | TCG | 1 | C | A |
| TCGA-24-0979 | HTR1E      | ENST00000369584 | p.T49N   | c.146C>A  | Verified   | GGC | ACC | ACC | 2 | C | A |
| TCGA-24-1844 | HTR2C      | ENST00000371951 | p.Q22K   | c.64C>A   | Unverified | tgg | caa | tgt | 1 | C | A |
| TCGA-29-1784 | HTR3D      | ENST00000334128 | p.S32Y   | c.95C>A   | Unverified | CCT | TCC | ATG | 2 | C | A |
| TCGA-29-1784 | HTR3D_ENS  | ENST00000382489 | p.S167Y  | c.500C>A  | Unverified | CCT | TCC | ATG | 2 | C | A |
| TCGA-61-1910 | HTR5A      | ENST00000287907 | p.L59M   | c.175C>A  | Unverified | AAC | CTG | CTG | 1 | C | A |
| TCGA-13-0900 | HUS1       | ENST00000436444 | p.H109N  | c.325C>A  | Verified   | aaa | cac | ttt | 1 | C | A |
| TCGA-29-1777 | HUWE1      | XM_497119.1     | p.Q3121K | c.9361C>A | Unverified | ttg | cag | cgc | 1 | C | A |
| TCGA-29-1777 | HUWE1_EN   | ENST00000342160 | p.Q3231K | c.9691C>A | Unverified | TTG | CAG | CGC | 1 | C | A |
| TCGA-25-2042 | HYAL3      | ENST00000336307 | p.G94G   | c.282C>A  | Unverified | GGG | GGC | ATC | 3 | C | A |
| TCGA-23-1032 | IDO2       | ENST00000389060 | p.N121K  | c.363C>A  | Verified   | AGG | AAC | TTG | 3 | C | A |

|              |            |                     |          |           |            |     |     |     |   |   |   |
|--------------|------------|---------------------|----------|-----------|------------|-----|-----|-----|---|---|---|
| TCGA-61-2095 | IGDCC3     | ENST00000327987     | p.P738T  | c.2212C>A | Unverified | GAT | CCT | GCA | 1 | C | A |
| TCGA-20-0991 | IGF1R      | ENST00000268035     | p.F958L  | c.2874C>A | Verified   | GTC | TTC | CAT | 3 | C | A |
| TCGA-13-0762 | IGSF1      | ENST00000361420     | p.T609N  | c.1826C>A | Verified   | TTA | ACC | CTC | 2 | C | A |
| TCGA-13-0762 | IGSF1      | ENST00000361420     | p.T609N  | c.1826C>A | Verified   | TTA | ACC | CTC | 2 | C | A |
| TCGA-13-0916 | IGSF21     | ENST00000251296     | p.D314E  | c.942C>A  | Unverified | ATC | GAC | AAC | 3 | C | A |
| TCGA-24-2262 | IGSF9B_ENS | ENST00000321016_v61 | p.P1092T | c.3274C>A | Unverified | TAC | CCG | GGC | 1 | C | A |
| TCGA-04-1367 | IKBKAP     | ENST00000374647     | p.D460E  | c.1380C>A | Verified   | gct | gac | cct | 3 | C | A |
| TCGA-23-1124 | IKZF4_ENST | ENST00000262032     | p.D48E   | c.144C>A  | Verified   | CAA | GAC | TCC | 3 | C | A |
| TCGA-04-1343 | IL12RB2    | ENST00000262345     | p.L253M  | c.757C>A  | Verified   | GTA | CTG | CTT | 1 | C | A |
| TCGA-30-1855 | IL21R_ENST | ENST00000395754     | p.P123T  | c.367C>A  | Unverified | CCC | CCT | TTC | 1 | C | A |
| TCGA-13-1498 | IL2RB      | ENST00000216223     | p.D426E  | c.1278C>A | Unverified | GAT | GAC | CTG | 3 | C | A |
| TCGA-13-0760 | IL3        | ENST00000296870     | p.A107A  | c.321C>A  | Verified   | CTG | GCC | ACG | 3 | C | A |
| TCGA-25-2401 | IL3        | ENST00000296870     | p.l118l  | c.354C>A  | Verified   | CAT | ATC | AAG | 3 | C | A |
| TCGA-24-0979 | IL36G      | ENST00000259205     | p.P113P  | c.339C>A  | Verified   | GAG | CCC | GTG | 3 | C | A |
| TCGA-13-0714 | IL8        | ENST00000307407     | p.C61*   | c.183C>A  | Verified   | CAC | TGC | GCC | 3 | C | A |
| TCGA-61-2094 | INO80D_EN  | ENST00000403263     | p.T874T  | c.2622C>A | Unverified | CCA | ACC | CAA | 3 | C | A |
| TCGA-61-1900 | INPP5D_EN  | ENST00000359570     | p.L676l  | c.2026C>A | Unverified | GTC | CTC | TGG | 1 | C | A |
| TCGA-29-1781 | INSC       | ENST00000379554     | p.H316N  | c.946C>A  | Unverified | GTC | CAC | CAG | 1 | C | A |
| TCGA-24-2267 | INSR       | ENST00000302850     | p.N175K  | c.525C>A  | Verified   | TTG | AAC | AAA | 3 | C | A |
| TCGA-24-2280 | INSR_ENST  | ENST00000302850     | p.S1094Y | c.3281C>A | Unverified | GTG | TCC | AAG | 2 | C | A |
| TCGA-30-1857 | INSRR_ENST | ENST00000368195     | p.P670Q  | c.2009C>A | Unverified | GAT | CCG | CGC | 2 | C | A |
| TCGA-13-0885 | IQGAP2     | ENST00000274364     | p.L635l  | c.1903C>A | Verified   | TGG | CTC | ACA | 1 | C | A |
| TCGA-13-0887 | IRGC       | ENST00000244314     | p.D130E  | c.390C>A  | Verified   | GTA | GAC | TTC | 3 | C | A |
| TCGA-30-1718 | IRS4       | ENST00000372129     | p.D842E  | c.2526C>A | Unverified | cta | gac | aaa | 3 | C | A |
| TCGA-61-1904 | IRX1       | ENST00000302006     | p.L205l  | c.613C>A  | Unverified | gcg | ctc | ttc | 1 | C | A |
| TCGA-61-1907 | IRX2       | NM_033267.2         | p.T163N  | c.488C>A  | Unverified | tcc | acc | tgg | 2 | C | A |
| TCGA-04-1367 | ISX        | ENST00000308700     | p.P213T  | c.637C>A  | Verified   | CAG | CCT | GTC | 1 | C | A |
| TCGA-09-2056 | ISYNA1     | ENST00000338128     | p.T326N  | c.977C>A  | Verified   | AAG | ACC | ATG | 2 | C | A |
| TCGA-61-1895 | ITGA2B     | ENST00000262407     | p.L752M  | c.2254C>A | Unverified | cag | ctg | cag | 1 | C | A |
| TCGA-13-0900 | ITGA4      | ENST00000397033     | p.P642H  | c.1925C>A | Verified   | AAG | CCC | CAT | 2 | C | A |
| TCGA-13-1499 | ITGA6      | ENST00000264107     | p.Q485K  | c.1453C>A | Verified   | CGC | CAG | AAA | 1 | C | A |
| TCGA-25-2392 | ITGAV      | ENST00000261023     | p.S501Y  | c.1502C>A | Verified   | GTT | TCC | TGT | 2 | C | A |
| TCGA-24-2024 | ITIH1      | ENST00000273283     | p.A79A   | c.237C>A  | Verified   | ACT | GCC | AAT | 3 | C | A |
| TCGA-20-0990 | ITIH2      | ENST00000358415     | p.N96K   | c.288C>A  | Verified   | GTG | AAC | AAT | 3 | C | A |

|              |            |                 |          |           |            |     |     |     |   |   |   |
|--------------|------------|-----------------|----------|-----------|------------|-----|-----|-----|---|---|---|
| TCGA-13-1488 | ITIH4      | ENST00000266041 | p.T51K   | c.152C>A  | Unverified | CAC | ACG | GTC | 2 | C | A |
| TCGA-61-1998 | ITIH5L     | ENST00000218436 | p.Q461K  | c.1381C>A | Verified   | cta | cag | ctg | 1 | C | A |
| TCGA-24-1104 | ITPR2      | ENST00000381340 | p.L1189I | c.3565C>A | Verified   | AGG | CTA | AGT | 1 | C | A |
| TCGA-13-0904 | IYD        | ENST00000344419 | p.D53E   | c.159C>A  | Verified   | AGT | GAC | CTG | 3 | C | A |
| TCGA-29-1695 | JAKMIP3    | ENST00000298622 | p.I158I  | c.474C>A  | Unverified | GAG | ATC | TCC | 3 | C | A |
| TCGA-23-1022 | JAM3       | ENST00000299106 | p.L68I   | c.202C>A  | Verified   | CTG | CTT | TTC | 1 | C | A |
| TCGA-25-1326 | JARID2     | ENST00000341776 | p.S986Y  | c.2957C>A | Verified   | atc | tcc | ccg | 2 | C | A |
| TCGA-13-0905 | KALRN      | ENST00000240874 | p.A1142E | c.3425C>A | Verified   | CAG | GCG | CTT | 2 | C | A |
| TCGA-20-1685 | KATNB1     | ENST00000379661 | p.A10D   | c.29C>A   | Unverified | ACA | GCC | TGG | 2 | C | A |
| TCGA-13-1497 | KBTBD3     | ENST00000526793 | p.F54L   | c.162C>A  | Verified   | GAT | TTC | AAA | 3 | C | A |
| TCGA-13-1488 | KBTBD4     | ENST00000526005 | p.Q203K  | c.607C>A  | Verified   | TCT | CAG | AAC | 1 | C | A |
| TCGA-04-1542 | KCNA4      | ENST00000328224 | p.T470N  | c.1409C>A | Verified   | CAC | ACC | CTC | 2 | C | A |
| TCGA-13-0885 | KCNA5      | ENST00000252321 | p.S395S  | c.1185C>A | Verified   | atg | tcc | ctg | 3 | C | A |
| TCGA-13-0793 | KCNC4      | ENST00000369787 | p.F235L  | c.705C>A  | Verified   | TTC | TTC | ATC | 3 | C | A |
| TCGA-23-1021 | KCNE1      | ENST00000399284 | p.S128S  | c.384C>A  | Verified   | CCT | TCC | CCA | 3 | C | A |
| TCGA-13-0883 | KCNG1      | ENST00000371571 | p.F84L   | c.252C>A  | Verified   | GAG | TTC | CCG | 3 | C | A |
| TCGA-29-1784 | KCNH1      | ENST00000271751 | p.T866K  | c.2597C>A | Unverified | AGG | ACA | AAA | 2 | C | A |
| TCGA-13-0714 | KCNJ9      | ENST00000368088 | p.H323Q  | c.969C>A  | Verified   | TTT | CAC | GAG | 3 | C | A |
| TCGA-24-1846 | KCNU1      | ENST00000399881 | p.P803T  | c.2407C>A | Unverified | CCC | CCA | CCC | 1 | C | A |
| TCGA-24-1846 | KCNU1_ENS  | ENST00000399881 | p.P803T  | c.2407C>A | Unverified | CCC | CCA | CCC | 1 | C | A |
| TCGA-13-1488 | KDM1A      | ENST00000400181 | p.P152T  | c.454C>A  | Verified   | ctt | ccc | cca | 1 | C | A |
| TCGA-13-1507 | KDM3B      | ENST00000314358 | p.L875M  | c.2623C>A | Verified   | CCC | CTG | AAA | 1 | C | A |
| TCGA-24-2290 | KDM5B      | NM_006618.2     | p.L878I  | c.2632C>A | Verified   | gat | ctc | tac | 1 | C | A |
| TCGA-24-2290 | KDM5B      | NM_006618.2     | p.L878I  | c.2632C>A | Verified   | gat | ctc | tac | 1 | C | A |
| TCGA-24-2035 | KEAP1      | ENST00000393623 | p.S45S   | c.135C>A  | Verified   | CCC | TCC | CAG | 3 | C | A |
| TCGA-30-1857 | KIAA0100   | ENST00000005905 | p.S556*  | c.1667C>A | Unverified | AAG | TCA | GCT | 2 | C | A |
| TCGA-23-1110 | KIAA0247   | ENST00000342745 | p.S120Y  | c.359C>A  | Verified   | CTG | TCT | ATA | 2 | C | A |
| TCGA-29-1698 | KIAA0556   | ENST00000261588 | p.T1552N | c.4655C>A | Unverified | CAC | ACC | ATC | 2 | C | A |
| TCGA-29-1698 | KIAA0556_E | ENST00000261588 | p.T1552N | c.4655C>A | Unverified | CAC | ACC | ATC | 2 | C | A |
| TCGA-13-1499 | KIAA0748   | ENST00000316577 | p.T377N  | c.1130C>A | Verified   | CAG | ACT | TTT | 2 | C | A |
| TCGA-25-2401 | KIAA1324L  | ENST00000297222 | p.T314N  | c.941C>A  | Verified   | TAC | ACC | CAT | 2 | C | A |
| TCGA-13-0886 | KIAA1522   | ENST00000401073 | p.G486G  | c.1458C>A | Unverified | TCT | GGC | CGG | 3 | C | A |
| TCGA-24-1843 | KIAA1755   | ENST00000279024 | p.D224E  | c.672C>A  | Unverified | CCA | GAC | AAC | 3 | C | A |
| TCGA-04-1542 | KIAA1919   | ENST00000368847 | p.P381T  | c.1141C>A | Verified   | TAC | CCT | GAT | 1 | C | A |

|              |            |                 |          |           |            |     |     |     |   |   |   |
|--------------|------------|-----------------|----------|-----------|------------|-----|-----|-----|---|---|---|
| TCGA-61-1907 | KIAA1949   | ENST00000399199 | p.A159A  | c.477C>A  | Unverified | GGA | GCC | CAA | 3 | C | A |
| TCGA-24-2288 | KIAA2018   | ENST00000316407 | p.T560N  | c.1679C>A | Unverified | AGC | ACC | ACC | 2 | C | A |
| TCGA-30-1714 | KIAA2022   | ENST00000373468 | p.P1344P | c.4032C>A | Unverified | gaa | ccc | atg | 3 | C | A |
| TCGA-09-1674 | KIF13B     | ENST00000524189 | p.A1198E | c.3593C>A | Unverified | GAT | GCG | ACC | 2 | C | A |
| TCGA-09-1674 | KIF13B_ENS | ENST00000524189 | p.A1198E | c.3593C>A | Unverified | GAT | GCG | ACC | 2 | C | A |
| TCGA-23-1123 | KIF17      | ENST00000247986 | p.S963R  | c.2889C>A | Verified   | CTC | AGC | ACA | 3 | C | A |
| TCGA-23-1123 | KIF17      | ENST00000247986 | p.S963R  | c.2889C>A | Verified   | CTC | AGC | ACA | 3 | C | A |
| TCGA-09-2044 | KIF3C      | ENST00000264712 | p.P445P  | c.1335C>A | Verified   | CCG | CCC | CAG | 3 | C | A |
| TCGA-23-2078 | KISS1      | ENST00000367194 | p.T16T   | c.48C>A   | Verified   | GCC | ACC | CAC | 3 | C | A |
| TCGA-30-1891 | KLF17      | ENST00000372299 | p.P71T   | c.211C>A  | Unverified | TCC | CCT | TTG | 1 | C | A |
| TCGA-13-0760 | KLHL4      | ENST00000373114 | p.P281H  | c.842C>A  | Verified   | cat | cct | tca | 2 | C | A |
| TCGA-23-1022 | KLK3       | ENST00000326003 | p.H78Q   | c.234C>A  | Verified   | cgg | cac | agc | 3 | C | A |
| TCGA-24-1845 | KLK3       | ENST00000326003 | p.T150T  | c.450C>A  | Unverified | ggg | acc | acc | 3 | C | A |
| TCGA-24-1845 | KLK3_ENSTC | ENST00000360617 | p.T150T  | c.450C>A  | Unverified | GGG | ACC | ACC | 3 | C | A |
| TCGA-13-0793 | KLK7       | ENST00000304045 | p.C211*  | c.633C>A  | Unverified | gtg | tgc | aga | 3 | C | A |
| TCGA-24-1463 | KLKB1      | ENST00000264690 | p.Q103K  | c.307C>A  | Unverified | AAG | CAA | TGT | 1 | C | A |
| TCGA-13-0920 | KLKB1      | ENST00000264690 | p.T520T  | c.1560C>A | Verified   | GTA | ACC | GGA | 3 | C | A |
| TCGA-24-1435 | KMO        | ENST00000366559 | p.L272I  | c.814C>A  | Verified   | AAA | CTC | CTA | 1 | C | A |
| TCGA-24-1847 | KMO        | ENST00000366559 | p.R452R  | c.1356C>A | Unverified | CTC | CGC | TTG | 3 | C | A |
| TCGA-04-1367 | KNTC1      | ENST00000333479 | p.I736I  | c.2208C>A | Verified   | tcc | atc | tta | 3 | C | A |
| TCGA-23-1122 | KPNA5      | ENST00000368564 | p.Q41K   | c.121C>A  | Unverified | aaa | caa | aaa | 1 | C | A |
| TCGA-24-1847 | KRT2       | ENST00000309680 | p.T504K  | c.1511C>A | Unverified | GTG | ACA | AGC | 2 | C | A |
| TCGA-04-1347 | KRT25      | ENST00000312150 | p.L198M  | c.592C>A  | Verified   | ACC | CTG | TGC | 1 | C | A |
| TCGA-23-2078 | KRT32      | ENST00000225899 | p.P433T  | c.1297C>A | Unverified | GTG | CCA | CGC | 1 | C | A |
| TCGA-20-1687 | KRT36      | ENST00000328119 | p.L56L   | c.168C>A  | Unverified | GGC | CTC | TCT | 3 | C | A |
| TCGA-04-1638 | KRT6A      | ENST00000330722 | p.A500D  | c.1499C>A | Unverified | GGT | GCC | AGT | 2 | C | A |
| TCGA-13-0916 | KRT72      | ENST00000293745 | p.T339N  | c.1016C>A | Verified   | CTC | ACC | AAG | 2 | C | A |
| TCGA-29-1777 | KRTAP6-1   | ENST00000329122 | p.T12T   | c.36C>A   | Unverified | GGC | ACC | CCT | 3 | C | A |
| TCGA-13-0761 | L1CAM      | ENST00000370060 | p.T910N  | c.2729C>A | Verified   | TTC | ACC | TTC | 2 | C | A |
| TCGA-13-0761 | L1CAM      | ENST00000370060 | p.T910N  | c.2729C>A | Verified   | TTC | ACC | TTC | 2 | C | A |
| TCGA-13-1505 | L1CAM      | ENST00000370060 | p.A897A  | c.2691C>A | Verified   | CAG | GCC | TTT | 3 | C | A |
| TCGA-23-1021 | LAMA3      | ENST00000313654 | p.N2296K | c.6888C>A | Verified   | gcc | aac | gac | 3 | C | A |
| TCGA-04-1336 | LAMB1      | ENST00000222399 | p.Q1037K | c.3109C>A | Verified   | GTG | CAA | GAG | 1 | C | A |
| TCGA-09-1665 | LAMB4      | ENST00000205386 | p.D1219E | c.3657C>A | Verified   | AAA | GAC | CTC | 3 | C | A |

|              |            |                 |          |           |            |     |     |     |   |   |   |
|--------------|------------|-----------------|----------|-----------|------------|-----|-----|-----|---|---|---|
| TCGA-24-2035 | LAMC3      | ENST00000361069 | p.T1292N | c.3875C>A | Verified   | CGA | ACC | CTC | 2 | C | A |
| TCGA-13-0755 | LASS4      | ENST00000251363 | p.T282T  | c.846C>A  | Verified   | CCC | ACC | CAG | 3 | C | A |
| TCGA-13-0714 | LATS1_ENST | ENST00000253339 | p.P1028T | c.3082C>A | Verified   | ATT | CCT | AAA | 1 | C | A |
| TCGA-13-0714 | LBP        | ENST00000217407 | p.L349M  | c.1045C>A | Verified   | CTC | CTG | AAC | 1 | C | A |
| TCGA-23-1114 | LCE2B      | ENST00000368780 | p.P96H   | c.287C>A  | Unverified | GAA | CCT | TCT | 2 | C | A |
| TCGA-13-0905 | LCP1       | ENST00000323076 | p.G113G  | c.339C>A  | Verified   | GTT | GGC | ACC | 3 | C | A |
| TCGA-23-1021 | LCP2       | ENST00000046794 | p.A393D  | c.1178C>A | Verified   | AGA | GCC | GAA | 2 | C | A |
| TCGA-61-1910 | LDHC       | NM_002301.2     | p.R297R  | c.889C>A  | Unverified | ggg | cgg | aat | 1 | C | A |
| TCGA-30-1857 | LDLR       | ENST00000558518 | p.C95*   | c.285C>A  | Unverified | GAC | TGC | GAC | 3 | C | A |
| TCGA-23-1031 | LEPRE1     | ENST00000236040 | p.N423K  | c.1269C>A | Verified   | GGG | AAC | CTT | 3 | C | A |
| TCGA-25-1313 | LGALS12    | ENST00000394618 | p.I92I   | c.276C>A  | Verified   | GAT | ATC | GCC | 3 | C | A |
| TCGA-23-1111 | LGALS4     | ENST00000307751 | p.I223I  | c.669C>A  | Unverified | GCT | ATC | AAC | 3 | C | A |
| TCGA-09-2044 | LGALS9C    | ENST00000328114 | p.D27E   | c.81C>A   | Verified   | CAG | GAC | GGA | 3 | C | A |
| TCGA-24-2267 | LHX8       | ENST00000294638 | p.P304Q  | c.911C>A  | Verified   | TCT | CCA | CCC | 2 | C | A |
| TCGA-61-1914 | LIG3       | NM_002311.2     | p.T709K  | c.2126C>A | Unverified | cat | aca | gct | 2 | C | A |
| TCGA-61-1914 | LIG3_ENST0 | ENST00000378526 | p.T796K  | c.2387C>A | Unverified | CAT | ACA | GCT | 2 | C | A |
| TCGA-23-1110 | LILRA3     | ENST00000251390 | p.G81G   | c.243C>A  | Verified   | AAG | GGC | CAG | 3 | C | A |
| TCGA-29-2427 | LILRA6     | ENST00000396365 | p.L243L  | c.729C>A  | Unverified | ACC | CTC | CAG | 3 | C | A |
| TCGA-13-1488 | LIPJ       | ENST00000371939 | p.S292Y  | c.875C>A  | Verified   | ACG | TCT | CCA | 2 | C | A |
| TCGA-29-2427 | LLGL1      | ENST00000316843 | p.A410A  | c.1230C>A | Verified   | TGG | GCC | CGC | 3 | C | A |
| TCGA-13-0913 | LMNA       | ENST00000368300 | p.N580K  | c.1740C>A | Unverified | tac | aac | ctg | 3 | C | A |
| TCGA-30-1855 | LOC51059   | ENST00000395297 | p.Q954K  | c.2860C>A | Unverified | CAG | CAA | AGC | 1 | C | A |
| TCGA-24-2280 | LOC51059   | ENST00000395297 | p.L1402L | c.4206C>A | Unverified | GGA | CTC | AAC | 3 | C | A |
| TCGA-61-2094 | LOC51059   | ENST00000395297 | p.G1351G | c.4053C>A | Unverified | CTG | GGC | CCT | 3 | C | A |
| TCGA-24-1464 | LOC51123   | ENST00000520984 | p.C41*   | c.123C>A  | Verified   | ACC | TGC | ACT | 3 | C | A |
| TCGA-25-2400 | LOC91807   | ENST00000394809 | p.G74G   | c.222C>A  | Unverified | CCG | GGC | CCG | 3 | C | A |
| TCGA-61-2008 | LONRF1     | ENST00000398246 | p.Q771K  | c.2311C>A | Verified   | GAC | CAA | TCT | 1 | C | A |
| TCGA-20-0991 | LOXL2      | ENST00000389131 | p.D28E   | c.84C>A   | Unverified | tat | gac | agc | 3 | C | A |
| TCGA-24-1843 | LPA        | ENST00000316300 | p.L1253I | c.3757C>A | Unverified | GTC | CTT | GCG | 1 | C | A |
| TCGA-13-1481 | LPA        | ENST00000316300 | p.S1299S | c.3897C>A | Verified   | TGG | TCC | TCT | 3 | C | A |
| TCGA-29-1783 | LPAR4      | ENST00000435339 | p.T187N  | c.560C>A  | Unverified | acc | acc | tgc | 2 | C | A |
| TCGA-13-0923 | LPIN1      | ENST00000256720 | p.T627N  | c.1880C>A | Verified   | AAG | ACT | CTC | 2 | C | A |
| TCGA-23-1022 | LRCH4      | ENST00000310300 | p.P535T  | c.1603C>A | Verified   | GTT | CCA | GAT | 1 | C | A |
| TCGA-04-1356 | LRFN2      | ENST00000338305 | p.P234H  | c.701C>A  | Verified   | CCA | CCC | TTG | 2 | C | A |

|              |            |                 |          |           |            |     |     |     |   |   |   |
|--------------|------------|-----------------|----------|-----------|------------|-----|-----|-----|---|---|---|
| TCGA-29-1705 | LRFN2      | ENST00000338305 | p.L271L  | c.813C>A  | Unverified | GGC | CTC | AAG | 3 | C | A |
| TCGA-24-2035 | LRIG1      | AF381545.1      | p.A984D  | c.2951C>A | Verified   | act | gcc | gct | 2 | C | A |
| TCGA-61-1900 | LRIG1      | AF381545.1      | p.R647R  | c.1941C>A | Unverified | cga | cgc | atg | 3 | C | A |
| TCGA-20-1686 | LRP1B      | ENST00000389484 | p.T2529T | c.7587C>A | Unverified | CTC | ACC | TGT | 3 | C | A |
| TCGA-25-2392 | LRP2       | ENST00000263816 | p.Q1959K | c.5875C>A | Unverified | CAC | CAG | CTT | 1 | C | A |
| TCGA-23-2077 | LRP2       | ENST00000263816 | p.A1967E | c.5900C>A | Verified   | ATT | GCA | GTC | 2 | C | A |
| TCGA-13-0920 | LRP6       | ENST00000261349 | p.S1613Y | c.4838C>A | Verified   | TCC | TCC | TGA | 2 | C | A |
| TCGA-23-1124 | LRPAP1     | ENST00000500728 | p.Q244K  | c.730C>A  | Verified   | CAC | CAG | GGC | 1 | C | A |
| TCGA-29-1764 | LRRC30     | ENST00000383467 | p.Y294*  | c.882C>A  | Unverified | GGC | TAC | CTG | 3 | C | A |
| TCGA-23-1110 | LRRC6      | ENST00000250173 | p.D241E  | c.723C>A  | Verified   | TTA | GAC | AAC | 3 | C | A |
| TCGA-04-1338 | LRRC63     | ENST00000446175 | p.Q169K  | c.505C>A  | Verified   | GCT | CAA | AAA | 1 | C | A |
| TCGA-24-1103 | LRRC7      | ENST00000035383 | p.P1496H | c.4487C>A | Verified   | CAG | CCT | GGT | 2 | C | A |
| TCGA-24-1845 | LRRK1      | SU_LRRK1        | p.N737K  | c.2211C>A | Unverified | tgg | aac | ctg | 3 | C | A |
| TCGA-24-1845 | LRRK1_ENST | ENST00000388948 | p.N725K  | c.2175C>A | Unverified | TGG | AAC | CTG | 3 | C | A |
| TCGA-25-1326 | LRRK2_ENST | ENST00000298910 | p.D1756E | c.5268C>A | Verified   | TTA | GAC | AAT | 3 | C | A |
| TCGA-24-1431 | LRRTM1     | ENST00000295057 | p.P516H  | c.1547C>A | Verified   | CAG | CCC | GCG | 2 | C | A |
| TCGA-29-1701 | LRRTM4     | ENST00000409088 | p.R232S  | c.694C>A  | Unverified | CTC | CGC | TCA | 1 | C | A |
| TCGA-29-1701 | LRRTM4_EN  | ENST00000409093 | p.R232S  | c.694C>A  | Unverified | CTC | CGC | TCA | 1 | C | A |
| TCGA-29-1784 | LSM12      | ENST00000293406 | p.I55I   | c.165C>A  | Unverified | GAC | ATC | TTG | 3 | C | A |
| TCGA-04-1651 | LY6G6F     | ENST00000375832 | p.G56G   | c.168C>A  | Unverified | GCA | GGC | TCC | 3 | C | A |
| TCGA-04-1651 | LY6G6F     | ENST00000375832 | p.G56G   | c.168C>A  | Unverified | GCA | GGC | TCC | 3 | C | A |
| TCGA-25-1313 | LYST       | ENST00000389793 | p.P594H  | c.1781C>A | Verified   | ATT | CCT | TTG | 2 | C | A |
| TCGA-61-1915 | LZTS1      | ENST00000381569 | p.P104H  | c.311C>A  | Unverified | CCC | CCC | AAG | 2 | C | A |
| TCGA-29-1775 | MAB21L2    | ENST00000317605 | p.T342T  | c.1026C>A | Unverified | CAG | ACC | TGG | 3 | C | A |
| TCGA-24-1563 | MAGEA11    | NM_005366.3     | p.H239Q  | c.717C>A  | Verified   | gag | cac | ttc | 3 | C | A |
| TCGA-24-1846 | MAGEA13P   | XM_498392.1     | p.A303D  | c.908C>A  | Unverified | gat | gcc | agt | 2 | C | A |
| TCGA-13-0887 | MAGEB5     | XM_293407.3     | p.A208D  | c.623C>A  | Verified   | aga | gcc | tat | 2 | C | A |
| TCGA-23-1114 | MAGEC1     | ENST00000285879 | p.T279N  | c.836C>A  | Unverified | tcc | act | tta | 2 | C | A |
| TCGA-04-1649 | MAGED1     | ENST00000375695 | p.P30H   | c.89C>A   | Unverified | cag | cct | cct | 2 | C | A |
| TCGA-61-1910 | MAGEE1     | ENST00000361470 | p.S293R  | c.879C>A  | Unverified | TCA | AGC | ACC | 3 | C | A |
| TCGA-61-1910 | MAGEE1_EN  | ENST00000361470 | p.S293R  | c.879C>A  | Unverified | TCA | AGC | ACC | 3 | C | A |
| TCGA-13-1496 | MAGI2      | ENST00000354212 | p.G930G  | c.2790C>A | Verified   | GAG | GGC | TTC | 3 | C | A |
| TCGA-04-1331 | MAP2       | ENST00000360351 | p.Q34K   | c.100C>A  | Verified   | GAT | CAA | GGC | 1 | C | A |
| TCGA-30-1718 | MAP3K14    | NM_003954       | p.H683Q  | c.2049C>A | Unverified | tac | cac | cag | 3 | C | A |

|              |           |                 |          |           |            |     |     |     |   |   |   |
|--------------|-----------|-----------------|----------|-----------|------------|-----|-----|-----|---|---|---|
| TCGA-29-1762 | MAP3K2    | ENST00000409947 | p.T339N  | c.1016C>A | Unverified | TTG | ACC | GTA | 2 | C | A |
| TCGA-29-1762 | MAP3K2_EN | ENST00000409947 | p.T339N  | c.1016C>A | Unverified | TTG | ACC | GTA | 2 | C | A |
| TCGA-36-1577 | MAP3K3    | ENST00000361733 | p.L416I  | c.1246C>A | Unverified | TTG | CTA | AAG | 1 | C | A |
| TCGA-61-1914 | MAP4K1    | NM_007181       | p.T266N  | c.797C>A  | Unverified | gcc | acc | aag | 2 | C | A |
| TCGA-61-1914 | MAP4K1_EN | ENST00000396857 | p.T266N  | c.797C>A  | Unverified | GCC | ACC | AAG | 2 | C | A |
| TCGA-29-1763 | MAPK7     | ENST00000308406 | p.S803Y  | c.2408C>A | Unverified | gac | tcc | cca | 2 | C | A |
| TCGA-13-1408 | MAST1     | ENST00000251472 | p.A269D  | c.806C>A  | Unverified | GTG | GCC | TTC | 2 | C | A |
| TCGA-29-1693 | MBD3L3    | ENST00000333843 | p.A130D  | c.389C>A  | Unverified | AGG | GCT | GGT | 2 | C | A |
| TCGA-23-1124 | MBTPS1    | ENST00000343411 | p.T238N  | c.713C>A  | Verified   | TGG | ACC | AAC | 2 | C | A |
| TCGA-09-2051 | MC4R      | ENST00000299766 | p.N3K    | c.9C>A    | Unverified | GTG | AAC | TCC | 3 | C | A |
| TCGA-13-1489 | MCAT      | ENST00000290429 | p.S217Y  | c.650C>A  | Verified   | AAG | TCT | TTA | 2 | C | A |
| TCGA-61-1915 | MCC       | ENST00000302475 | p.D271E  | c.813C>A  | Unverified | CGG | GAC | CGG | 3 | C | A |
| TCGA-61-1915 | MCC_ENST0 | ENST00000408903 | p.D461E  | c.1383C>A | Unverified | CGG | GAC | CGG | 3 | C | A |
| TCGA-25-1313 | MCM2      | ENST00000265056 | p.A263A  | c.789C>A  | Verified   | GCT | GCC | CTG | 3 | C | A |
| TCGA-29-1784 | MCTP2     | ENST00000357742 | p.N557K  | c.1671C>A | Unverified | TGG | AAC | AAA | 3 | C | A |
| TCGA-25-1326 | MDGA2     | ENST00000357362 | p.P598T  | c.1792C>A | Verified   | AAC | CCT | TAT | 1 | C | A |
| TCGA-13-1501 | MDGA2     | ENST00000357362 | p.G445G  | c.1335C>A | Verified   | TTG | GGC | ATC | 3 | C | A |
| TCGA-13-1501 | MDGA2     | ENST00000357362 | p.G445G  | c.1335C>A | Verified   | TTG | GGC | ATC | 3 | C | A |
| TCGA-23-1123 | MDS2      | ENST00000374555 | p.S49R   | c.147C>A  | Verified   | CTG | AGC | TGC | 3 | C | A |
| TCGA-23-1123 | MDS2      | ENST00000374555 | p.S49R   | c.147C>A  | Verified   | CTG | AGC | TGC | 3 | C | A |
| TCGA-23-1118 | ME1       | ENST00000369705 | p.Q488K  | c.1462C>A | Verified   | CAG | CAA | GTG | 1 | C | A |
| TCGA-23-1120 | ME1       | ENST00000369705 | p.P22T   | c.64C>A   | Unverified | AAC | CCT | CAC | 1 | C | A |
| TCGA-29-1785 | MED12L    | ENST00000474524 | p.P1793H | c.5378C>A | Unverified | GTG | CCT | CCT | 2 | C | A |
| TCGA-29-1785 | MED12L    | ENST00000474524 | p.P1793H | c.5378C>A | Unverified | GTG | CCT | CCT | 2 | C | A |
| TCGA-29-1766 | MED13L    | ENST00000281928 | p.R2075R | c.6223C>A | Unverified | agt | cgg | agc | 1 | C | A |
| TCGA-04-1649 | MED24     | NM_014815.2     | p.R385R  | c.1155C>A | Unverified | aag | cgc | aaa | 3 | C | A |
| TCGA-09-2044 | MEPE      | ENST00000361056 | p.N356K  | c.1068C>A | Verified   | GGA | AAC | AGA | 3 | C | A |
| TCGA-23-1120 | METTL17   | ENST00000339374 | p.A110D  | c.329C>A  | Verified   | CGG | GCT | AGG | 2 | C | A |
| TCGA-20-1687 | MFSD2A    | ENST00000372811 | p.T229K  | c.686C>A  | Unverified | CAT | ACA | CAT | 2 | C | A |
| TCGA-13-0924 | MGA       | XM_031689.7     | p.S645R  | c.1935C>A | Verified   | gta | agc | cct | 3 | C | A |
| TCGA-13-0795 | MGAM_ENS  | ENST00000549489 | p.R1285R | c.3853C>A | Verified   | GAG | CGG | CAG | 1 | C | A |
| TCGA-20-0990 | MGAM_ENS  | ENST00000549489 | p.P1492T | c.4474C>A | Verified   | AGA | CCC | ACA | 1 | C | A |
| TCGA-04-1638 | MGAT3     | ENST00000341184 | p.H276Q  | c.828C>A  | Unverified | GAC | CAC | TTC | 3 | C | A |
| TCGA-24-1431 | MGC15476  | ENST00000300875 | p.A338A  | c.1014C>A | Unverified | TCT | GCC | TCC | 3 | C | A |

|              |                       |                 |           |            |            |     |     |     |   |   |   |
|--------------|-----------------------|-----------------|-----------|------------|------------|-----|-----|-----|---|---|---|
| TCGA-13-0905 | MGC33530              | ENST00000402026 | p.Y133*   | c.399C>A   | Verified   | AAC | TAC | GGG | 3 | C | A |
| TCGA-61-1913 | MIA3                  | ENST00000344922 | p.L504I   | c.1510C>A  | Unverified | AAC | CTC | AAC | 1 | C | A |
| TCGA-23-1114 | MLL                   | NM_005933.1     | p.R176S   | c.526C>A   | Unverified | cct | cgt | ggg | 1 | C | A |
| TCGA-24-2288 | MLL                   | NM_005933.1     | p.S3202R  | c.9606C>A  | Unverified | tcc | agc | cag | 3 | C | A |
| TCGA-23-1114 | MLL_ENST00000534358   | ENST00000534358 | p.R176S   | c.526C>A   | Unverified | CCT | CGT | GGG | 1 | C | A |
| TCGA-04-1347 | MMP7                  | ENST00000260227 | p.L6M     | c.16C>A    | Verified   | gtg | ctg | tgt | 1 | C | A |
| TCGA-24-1847 | MOAP1                 | ENST00000298894 | p.F168L   | c.504C>A   | Unverified | GTG | TTC | TCG | 3 | C | A |
| TCGA-13-0903 | MOCS3                 | ENST00000244051 | p.P45T    | c.133C>A   | Verified   | GTT | CCG | GTG | 1 | C | A |
| TCGA-04-1361 | MOGAT2                | ENST00000198801 | p.P6T     | c.16C>A    | Verified   | gcg | ccc | ttg | 1 | C | A |
| TCGA-04-1361 | MOGAT2                | ENST00000198801 | p.P6T     | c.16C>A    | Verified   | gcg | ccc | ttg | 1 | C | A |
| TCGA-24-2290 | MOGAT3                | ENST00000223114 | p.T339N   | c.1016C>A  | Verified   | CTC | ACC | TTC | 2 | C | A |
| TCGA-24-2290 | MOGAT3                | ENST00000223114 | p.T339N   | c.1016C>A  | Verified   | CTC | ACC | TTC | 2 | C | A |
| TCGA-29-1691 | MRC2                  | ENST00000303375 | p.H1317N  | c.3949C>A  | Unverified | GAG | CAC | CTG | 1 | C | A |
| TCGA-61-1740 | MRGPRX1               | ENST00000302797 | p.S150Y   | c.449C>A   | Unverified | CTG | TCC | CTG | 2 | C | A |
| TCGA-24-1850 | MRPL30                | ENST00000338148 | p.P63H    | c.188C>A   | Unverified | AAC | CCT | CAT | 2 | C | A |
| TCGA-04-1367 | MSLNL                 | ENST00000293892 | p.R190S   | c.568C>A   | Verified   | ACC | CGT | GCA | 1 | C | A |
| TCGA-09-1674 | MST1R                 | ENST00000296474 | p.P1365H  | c.4094C>A  | Unverified | GGC | CCC | AGC | 2 | C | A |
| TCGA-09-1674 | MST1R_ENST00000296474 | ENST00000296474 | p.P1365H  | c.4094C>A  | Unverified | GGC | CCC | AGC | 2 | C | A |
| TCGA-24-1604 | MTFMT                 | ENST00000220058 | p.R266S   | c.796C>A   | Verified   | TAC | CGT | GCC | 1 | C | A |
| TCGA-09-1665 | MTMR8                 | ENST00000374852 | p.T147T   | c.441C>A   | Verified   | tgg | acc | ata | 3 | C | A |
| TCGA-04-1336 | MTNR1A                | ENST00000307161 | p.F196L   | c.588C>A   | Verified   | CAC | TTC | CTC | 3 | C | A |
| TCGA-13-0886 | MTUS2_ENST00000431530 | ENST00000431530 | p.P998Q   | c.2993C>A  | Unverified | GAC | CCG | CAG | 2 | C | A |
| TCGA-24-1435 | MUC16                 | ENST00000397910 | p.Q6158K  | c.18472C>A | Verified   | ACA | CAA | ACA | 1 | C | A |
| TCGA-24-2035 | MUC16                 | ENST00000397910 | p.S1733Y  | c.5198C>A  | Verified   | TCC | TCC | TCT | 2 | C | A |
| TCGA-04-1652 | MUC16                 | ENST00000397910 | p.T1322T  | c.3966C>A  | Unverified | CCC | ACC | ACC | 3 | C | A |
| TCGA-04-1652 | MUC16                 | ENST00000397910 | p.T1322T  | c.3966C>A  | Unverified | CCC | ACC | ACC | 3 | C | A |
| TCGA-24-1435 | MUC16_ENST00000331986 | ENST00000331986 | p.Q1791K  | c.5371C>A  | Verified   | GGC | CAA | CTG | 1 | C | A |
| TCGA-04-1652 | MUC16_ENST00000397910 | ENST00000397910 | p.T1322T  | c.3966C>A  | Unverified | CCC | ACC | ACC | 3 | C | A |
| TCGA-04-1652 | MUC16_ENST00000397910 | ENST00000397910 | p.T1322T  | c.3966C>A  | Unverified | CCC | ACC | ACC | 3 | C | A |
| TCGA-13-0755 | MUC16_ENST00000397910 | ENST00000397910 | p.C13862* | c.41586C>A | Verified   | ATC | TGC | ACC | 3 | C | A |
| TCGA-23-1110 | MUC17                 | ENST00000306151 | p.S3984Y  | c.11951C>A | Verified   | ACA | TCT | TTT | 2 | C | A |
| TCGA-29-1763 | MUC17                 | ENST00000306151 | p.T2784N  | c.8351C>A  | Unverified | ACC | ACT | TCT | 2 | C | A |
| TCGA-30-1891 | MUC17                 | ENST00000306151 | p.T3688K  | c.11063C>A | Unverified | TGG | ACG | CCT | 2 | C | A |
| TCGA-13-0885 | MUC17                 | ENST00000306151 | p.T2298T  | c.6894C>A  | Verified   | AGC | ACC | CTT | 3 | C | A |



|              |           |                 |          |            |            |     |     |     |   |   |   |
|--------------|-----------|-----------------|----------|------------|------------|-----|-----|-----|---|---|---|
| TCGA-61-1740 | MUC17     | ENST00000306151 | p.L3820L | c.11460C>A | Unverified | GTC | CTC | ATC | 3 | C | A |
| TCGA-25-1313 | MUC2      | ENST00000359061 | p.T1571T | c.4713C>A  | Unverified | GTG | ACC | CCA | 3 | C | A |
| TCGA-25-1313 | MUC2_ENST | ENST00000441003 | p.T1570T | c.4710C>A  | Unverified | GTG | ACC | CCA | 3 | C | A |
| TCGA-61-1998 | MUC5AC    | ENST00000349637 | p.Q117K  | c.349C>A   | Verified   | GTC | CAG | CTA | 1 | C | A |
| TCGA-04-1342 | MUC6      | ENST00000421673 | p.P1409Q | c.4226C>A  | Unverified | TCC | CCG | CCT | 2 | C | A |
| TCGA-61-1998 | MX1       | ENST00000398598 | p.L619I  | c.1855C>A  | Verified   | CAG | CTC | CTG | 1 | C | A |
| TCGA-29-2427 | MYBPC2_EN | ENST00000357701 | p.P837T  | c.2509C>A  | Unverified | GAG | CCA | CCC | 1 | C | A |
| TCGA-29-1769 | MYBPC2_EN | ENST00000357701 | p.T118N  | c.353C>A   | Unverified | TAC | ACC | GTG | 2 | C | A |
| TCGA-24-2289 | MYH13     | ENST00000252172 | p.T1377N | c.4130C>A  | Unverified | AGG | ACC | AAA | 2 | C | A |
| TCGA-24-2289 | MYH13_ENS | ENST00000570743 | p.T1377N | c.4130C>A  | Unverified | AGG | ACC | AAA | 2 | C | A |
| TCGA-13-1497 | MYH2      | ENST00000245503 | p.Q501K  | c.1501C>A  | Verified   | GAG | CAG | GAG | 1 | C | A |
| TCGA-10-0930 | MYH8      | ENST00000403437 | p.Q1214K | c.3640C>A  | Verified   | TTG | CAG | CGG | 1 | C | A |
| TCGA-10-0930 | MYH8      | ENST00000403437 | p.Q1214K | c.3640C>A  | Verified   | TTG | CAG | CGG | 1 | C | A |
| TCGA-13-1408 | MYL1      | ENST00000352451 | p.T158T  | c.474C>A   | Verified   | GCC | ACC | CTG | 3 | C | A |
| TCGA-09-2051 | MYL4      | ENST00000393450 | p.T68N   | c.203C>A   | Verified   | CCG | ACT | GGA | 2 | C | A |
| TCGA-25-2400 | MYLK3     | SU_caMLCK       | p.G74G   | c.222C>A   | Unverified | ccg | ggc | ccg | 3 | C | A |
| TCGA-09-2049 | MYO18B    | ENST00000335473 | p.P2223T | c.6667C>A  | Verified   | GAA | CCT | GCT | 1 | C | A |
| TCGA-61-1740 | MYO1B     | ENST00000339514 | p.L295I  | c.883C>A   | Unverified | GGT | CTA | GAT | 1 | C | A |
| TCGA-61-1740 | MYO1B_ENS | ENST00000392318 | p.L295I  | c.883C>A   | Unverified | GGT | CTA | GAT | 1 | C | A |
| TCGA-61-2009 | MYO5B     | ENST00000285039 | p.P619T  | c.1855C>A  | Verified   | AGA | CCC | CCC | 1 | C | A |
| TCGA-24-1845 | MYOCD     | ENST00000343344 | p.A667D  | c.2000C>A  | Unverified | GGG | GCC | CAG | 2 | C | A |
| TCGA-24-1845 | MYOCD_ENS | ENST00000425538 | p.A667D  | c.2000C>A  | Unverified | GGG | GCC | CAG | 2 | C | A |
| TCGA-23-1110 | MYOM2     | ENST00000262113 | p.D1317E | c.3951C>A  | Verified   | CTT | GAC | CTG | 3 | C | A |
| TCGA-13-0904 | MYOZ1     | ENST00000359322 | p.P216P  | c.648C>A   | Verified   | CTT | CCC | AAA | 3 | C | A |
| TCGA-29-1703 | MYT1L     | ENST00000399161 | p.R245R  | c.733C>A   | Unverified | GGT | CGG | AAA | 1 | C | A |
| TCGA-24-1847 | N4BP3     | ENST00000274605 | p.P207T  | c.619C>A   | Unverified | AGC | CCC | TTC | 1 | C | A |
| TCGA-23-1031 | NAA30     | ENST00000556492 | p.S190S  | c.570C>A   | Unverified | TCG | TCC | CTG | 3 | C | A |
| TCGA-24-1417 | NALCN     | ENST00000251127 | p.P1236T | c.3706C>A  | Verified   | GAC | CCG | GTG | 1 | C | A |
| TCGA-61-1899 | NALP6     | ENST00000312165 | p.P486Q  | c.1457C>A  | Unverified | CTG | CCG | GGC | 2 | C | A |
| TCGA-24-1470 | NAPB      | ENST00000377026 | p.T260N  | c.779C>A   | Verified   | TAC | ACT | GAA | 2 | C | A |
| TCGA-24-1604 | NAV1      | ENST00000367296 | p.A745E  | c.2234C>A  | Unverified | AAG | GCA | GTG | 2 | C | A |
| TCGA-24-2024 | NCAM2     | ENST00000400546 | p.Q616K  | c.1846C>A  | Verified   | AAA | CAG | GAC | 1 | C | A |
| TCGA-30-1714 | NCKAP1L   | ENST00000293373 | p.N64K   | c.192C>A   | Unverified | CCC | AAC | ATA | 3 | C | A |
| TCGA-30-1718 | NCOA6     | ENST00000374796 | p.P988T  | c.2962C>A  | Unverified | CCT | CCT | CAA | 1 | C | A |

|              |            |                 |          |           |            |     |     |     |   |   |   |
|--------------|------------|-----------------|----------|-----------|------------|-----|-----|-----|---|---|---|
| TCGA-13-0900 | NCOR2      | NM_006312.2     | p.Y471*  | c.1413C>A | Verified   | tac | tac | ctg | 3 | C | A |
| TCGA-09-2049 | NDRG3      | ENST00000349004 | p.T348N  | c.1043C>A | Verified   | GTC | ACC | AGC | 2 | C | A |
| TCGA-24-2289 | NDUFB11    | ENST00000276062 | p.P49T   | c.145C>A  | Unverified | ccc | cca | gaa | 1 | C | A |
| TCGA-25-1326 | NEB        | ENST00000409198 | p.I2779I | c.8337C>A | Verified   | CCT | ATC | AAG | 3 | C | A |
| TCGA-04-1331 | NEDD4      | ENST00000338963 | p.S161Y  | c.482C>A  | Verified   | GGG | TCT | TAC | 2 | C | A |
| TCGA-13-0761 | NEDD4L     | ENST00000382850 | p.T63K   | c.188C>A  | Unverified | CAG | ACA | AAA | 2 | C | A |
| TCGA-13-0761 | NEDD4L     | ENST00000382850 | p.T63K   | c.188C>A  | Unverified | CAG | ACA | AAA | 2 | C | A |
| TCGA-13-0883 | NES        | ENST00000368223 | p.I278I  | c.834C>A  | Verified   | CAG | ATC | GCT | 3 | C | A |
| TCGA-24-0975 | NFATC3_EN! | ENST00000346183 | p.L1075L | c.3225C>A | Unverified | GGG | CTC | TAA | 3 | C | A |
| TCGA-25-2400 | NFATC4     | ENST00000250373 | p.P62H   | c.185C>A  | Verified   | ATT | CCC | CGA | 2 | C | A |
| TCGA-29-1768 | NFXL1      | ENST00000381538 | p.L198I  | c.592C>A  | Unverified | TTT | CTT | GTA | 1 | C | A |
| TCGA-04-1652 | NHLRC1     | ENST00000340650 | p.A322A  | c.966C>A  | Unverified | ACT | GCC | TCC | 3 | C | A |
| TCGA-04-1652 | NHLRC1     | ENST00000340650 | p.A322A  | c.966C>A  | Unverified | ACT | GCC | TCC | 3 | C | A |
| TCGA-13-1496 | NIPBL      | ENST00000282516 | p.S861*  | c.2582C>A | Verified   | agt | tca | aaa | 2 | C | A |
| TCGA-13-0883 | NISCH      | ENST00000345716 | p.L1232M | c.3694C>A | Verified   | GAC | CTG | CAG | 1 | C | A |
| TCGA-25-2400 | NKG7       | ENST00000221978 | p.L144I  | c.430C>A  | Unverified | TTG | CTC | TGT | 1 | C | A |
| TCGA-13-0760 | NLK        | NM_016231       | p.P223T  | c.667C>A  | Verified   | caa | cca | ctc | 1 | C | A |
| TCGA-09-2056 | NLRC4      | ENST00000360906 | p.H56Q   | c.168C>A  | Verified   | att | cac | atg | 3 | C | A |
| TCGA-25-2401 | NLRP10     | ENST00000328600 | p.L83M   | c.247C>A  | Verified   | AAC | CTG | TTG | 1 | C | A |
| TCGA-29-1763 | NLRP10     | ENST00000328600 | p.R465S  | c.1393C>A | Unverified | TTC | CGC | CAC | 1 | C | A |
| TCGA-13-0886 | NLRP14     | ENST00000299481 | p.A398D  | c.1193C>A | Verified   | ACA | GCT | CTG | 2 | C | A |
| TCGA-29-1766 | NLRP4_ENS  | ENST00000301295 | p.S589Y  | c.1766C>A | Unverified | GTT | TCT | GCC | 2 | C | A |
| TCGA-24-2288 | NME1-NME!  | ENST00000393193 | p.H162N  | c.484C>A  | Unverified | GAA | CAC | CTG | 1 | C | A |
| TCGA-24-2288 | NME2       | ENST00000514264 | p.H47N   | c.139C>A  | Unverified | gaa | cac | ctg | 1 | C | A |
| TCGA-61-1914 | NOD2       | ENST00000300589 | p.L145I  | c.433C>A  | Unverified | agg | ctc | cac | 1 | C | A |
| TCGA-29-1699 | NOL4       | ENST00000261592 | p.T119K  | c.356C>A  | Unverified | GAA | ACG | GGG | 2 | C | A |
| TCGA-29-1698 | NOP2       | ENST00000399466 | p.S655*  | c.1964C>A | Unverified | GAC | TCA | GAA | 2 | C | A |
| TCGA-61-1998 | NOS1       | ENST00000317775 | p.P1186T | c.3556C>A | Verified   | TCC | CCA | GAC | 1 | C | A |
| TCGA-24-1616 | NOTCH2NL   | ENST00000362074 | p.T39N   | c.116C>A  | Verified   | GGG | ACT | TGT | 2 | C | A |
| TCGA-24-2024 | NOTCH4     | ENST00000375023 | p.Q1809K | c.5425C>A | Verified   | cac | caa | cgt | 1 | C | A |
| TCGA-29-1711 | NOTCH4     | ENST00000375023 | p.C859*  | c.2577C>A | Unverified | cac | tgc | ctc | 3 | C | A |
| TCGA-29-1711 | NOTCH4     | ENST00000375023 | p.C859*  | c.2577C>A | Unverified | cac | tgc | ctc | 3 | C | A |
| TCGA-29-1761 | NOVA1      | ENST00000539517 | p.A276D  | c.827C>A  | Unverified | act | gct | gaa | 2 | C | A |
| TCGA-23-1122 | NOX1       | NM_013954.1     | p.R130R  | c.388C>A  | Verified   | agc | cga | cag | 1 | C | A |

|              |            |                 |          |            |            |     |     |     |   |   |   |
|--------------|------------|-----------------|----------|------------|------------|-----|-----|-----|---|---|---|
| TCGA-29-1784 | NOXRED1    | ENST00000380835 | p.S358Y  | c.1073C>A  | Unverified | CCA | TCC | CAA | 2 | C | A |
| TCGA-30-1891 | NPC1L1     | ENST00000289547 | p.I218I  | c.654C>A   | Unverified | GAC | ATC | ACC | 3 | C | A |
| TCGA-29-1695 | NPFFR2     | ENST00000308744 | p.I149I  | c.447C>A   | Unverified | GCA | ATC | TTC | 3 | C | A |
| TCGA-13-1498 | NPR1       | ENST00000368680 | p.G646G  | c.1938C>A  | Verified   | aag | ggc | atg | 3 | C | A |
| TCGA-13-1498 | NR_002217_ | ENST00000338780 | p.D124E  | c.372C>A   | Verified   | CCA | GAC | ACG | 3 | C | A |
| TCGA-61-2113 | NR1D2      | ENST00000312521 | p.L555I  | c.1663C>A  | Unverified | CTG | CTT | CTA | 1 | C | A |
| TCGA-36-1577 | NR1H3      | ENST00000441012 | p.R156S  | c.466C>A   | Unverified | CTT | CGC | AAA | 1 | C | A |
| TCGA-23-1022 | NRAP       | ENST00000359988 | p.P1220H | c.3659C>A  | Verified   | ACT | CCC | AAC | 2 | C | A |
| TCGA-24-1563 | NRAP       | ENST00000359988 | p.N456K  | c.1368C>A  | Verified   | TAC | AAC | TAC | 3 | C | A |
| TCGA-29-1691 | NRBF2      | ENST00000277746 | p.T242N  | c.725C>A   | Unverified | TCA | ACC | TGG | 2 | C | A |
| TCGA-24-2288 | NRG3       | ENST00000372141 | p.S147S  | c.441C>A   | Unverified | GCC | TCC | TCC | 3 | C | A |
| TCGA-24-1423 | NRXN1_ENS  | ENST00000406316 | p.T766T  | c.2298C>A  | Verified   | GAC | ACC | CTC | 3 | C | A |
| TCGA-30-1714 | NRXN2      | ENST00000377551 | p.L670I  | c.2008C>A  | Unverified | gac | ctc | cgg | 1 | C | A |
| TCGA-29-1775 | NRXN2      | ENST00000377551 | p.S1020Y | c.3059C>A  | Unverified | gac | tcc | cgc | 2 | C | A |
| TCGA-24-1435 | NRXN2      | ENST00000377551 | p.P1329P | c.3987C>A  | Verified   | gac | ccc | aat | 3 | C | A |
| TCGA-09-1665 | NTM        | ENST00000374786 | p.P112H  | c.335C>A   | Verified   | GGC | CCT | TAC | 2 | C | A |
| TCGA-24-2280 | NTRK1      | ENST00000524377 | p.D537E  | c.1611C>A  | Unverified | CAG | GAC | AAG | 3 | C | A |
| TCGA-24-2280 | NTRK1_ENS  | ENST00000392302 | p.D501E  | c.1503C>A  | Unverified | CAG | GAC | AAG | 3 | C | A |
| TCGA-24-1845 | NUP133     | ENST00000261396 | p.A949D  | c.2846C>A  | Unverified | aag | gct | cat | 2 | C | A |
| TCGA-30-1855 | NUP160     | ENST00000378460 | p.R1116R | c.3346C>A  | Unverified | CTC | CGG | GGA | 1 | C | A |
| TCGA-09-2056 | NXF2B      | ENST00000372750 | p.Q624K  | c.1870C>A  | Verified   | AAG | CAA | ATC | 1 | C | A |
| TCGA-29-1761 | O5AK3_HUM  | ENST00000326876 | p.L130I  | c.388C>A   | Unverified | CCC | CTT | CGC | 1 | C | A |
| TCGA-23-1031 | OBSCN      | SU_OBSCN.1      | p.A5650A | c.16950C>A | Unverified | gag | gcc | cgc | 3 | C | A |
| TCGA-29-1691 | OC90       | XM_070277.6     | p.F69L   | c.207C>A   | Unverified | cac | ttc | acc | 3 | C | A |
| TCGA-24-1846 | OC90_ENST  | ENST00000262283 | p.T394T  | c.1182C>A  | Unverified | ACA | ACC | ATC | 3 | C | A |
| TCGA-29-1691 | OC90_ENST  | ENST00000262283 | p.F259L  | c.777C>A   | Unverified | CAC | TTC | ACC | 3 | C | A |
| TCGA-13-0923 | ODZ2       | ENST00000388903 | p.S1584Y | c.4751C>A  | Verified   | TAT | GCT | AAT | 2 | C | A |
| TCGA-29-1784 | ODZ2_ENST  | ENST00000518659 | p.S1975Y | c.5924C>A  | Unverified | ATG | TCC | ACA | 2 | C | A |
| TCGA-29-1784 | ODZ2_ENST  | ENST00000519204 | p.S1854Y | c.5561C>A  | Unverified | ATG | TCC | ACA | 2 | C | A |
| TCGA-61-2008 | OGT        | ENST00000373701 | p.T444K  | c.1331C>A  | Verified   | cgc | acg | gct | 2 | C | A |
| TCGA-61-2008 | OGT_ENST   | ENST00000373719 | p.T454K  | c.1361C>A  | Verified   | CGC | ACG | GCT | 2 | C | A |
| TCGA-61-1900 | OLFM4      | ENST00000219022 | p.T354N  | c.1061C>A  | Unverified | CTG | ACC | ACC | 2 | C | A |
| TCGA-29-1784 | OLFM4      | ENST00000219022 | p.T448T  | c.1344C>A  | Unverified | AAC | ACC | AGA | 3 | C | A |
| TCGA-24-2280 | OLIG3      | ENST00000367734 | p.Q33K   | c.97C>A    | Unverified | CAC | CAG | GAG | 1 | C | A |

|              |           |                 |         |          |            |     |     |     |   |   |   |
|--------------|-----------|-----------------|---------|----------|------------|-----|-----|-----|---|---|---|
| TCGA-04-1361 | OMD       | ENST00000375550 | p.P232H | c.695C>A | Verified   | TTG | CCT | TCT | 2 | C | A |
| TCGA-04-1361 | OMD       | ENST00000375550 | p.P232H | c.695C>A | Verified   | TTG | CCT | TCT | 2 | C | A |
| TCGA-61-1907 | OPCML     | ENST00000331898 | p.T96N  | c.287C>A | Unverified | CCA | ACC | CAG | 2 | C | A |
| TCGA-61-1907 | OPCML_ENS | ENST00000524381 | p.T89N  | c.266C>A | Unverified | CCA | ACC | CAG | 2 | C | A |
| TCGA-29-1702 | OPN1LW    | ENST00000369951 | p.Y284* | c.852C>A | Unverified | CCC | TAC | ACC | 3 | C | A |
| TCGA-29-1702 | OPN1LW_EN | ENST00000369951 | p.Y284* | c.852C>A | Unverified | CCC | TAC | ACC | 3 | C | A |
| TCGA-24-1604 | OR10A6    | ENST00000309838 | p.T181N | c.542C>A | Verified   | GAA | ACC | CCA | 2 | C | A |
| TCGA-36-1577 | OR10H2    | ENST00000305899 | p.P263P | c.789C>A | Verified   | AAG | CCC | AAA | 3 | C | A |
| TCGA-61-2008 | OR10J3    | ENST00000332217 | p.A77D  | c.230C>A | Verified   | GTG | GCC | ATC | 2 | C | A |
| TCGA-04-1347 | OR10X1    | ENST00000368150 | p.T54N  | c.161C>A | Verified   | CTC | ACC | CTT | 2 | C | A |
| TCGA-61-1900 | OR14I1    | ENST00000342623 | p.C150* | c.450C>A | Unverified | AGC | TGC | TTT | 3 | C | A |
| TCGA-09-1674 | OR1L4     | ENST00000259466 | p.L116M | c.346C>A | Unverified | CTG | CTG | GCC | 1 | C | A |
| TCGA-24-1843 | OR2G6     | ENST00000343414 | p.Q20K  | c.58C>A  | Unverified | GAT | CAG | CCT | 1 | C | A |
| TCGA-30-1718 | OR2K2     | ENST00000302681 | p.G41G  | c.123C>A | Unverified | TTG | GGC | AAC | 3 | C | A |
| TCGA-30-1718 | OR2K2_ENS | ENST00000374428 | p.G70G  | c.210C>A | Unverified | TTG | GGC | AAC | 3 | C | A |
| TCGA-23-1809 | OR2L3     | ENST00000359959 | p.T279N | c.836C>A | Unverified | ACC | ACC | CTC | 2 | C | A |
| TCGA-09-2049 | OR2M3     | ENST00000456743 | p.T133N | c.398C>A | Verified   | TAC | ACC | AAT | 2 | C | A |
| TCGA-61-1900 | OR2T3     | ENST00000359594 | p.L32I  | c.94C>A  | Unverified | CTC | CTC | TAC | 1 | C | A |
| TCGA-13-0903 | OR2T34    | ENST00000328782 | p.L60I  | c.178C>A | Verified   | CGC | CTC | CAC | 1 | C | A |
| TCGA-24-2290 | OR2W1     | ENST00000377175 | p.R122S | c.364C>A | Verified   | GAT | CGT | TTT | 1 | C | A |
| TCGA-24-2290 | OR2W1     | ENST00000377175 | p.R122S | c.364C>A | Verified   | GAT | CGT | TTT | 1 | C | A |
| TCGA-13-0890 | OR2W5     | ENST00000366492 | p.T110T | c.330C>A | Verified   | TCC | ACC | GAG | 3 | C | A |
| TCGA-29-1781 | OR4F6     | ENST00000328882 | p.A78D  | c.233C>A | Unverified | ACA | GCT | CCC | 2 | C | A |
| TCGA-30-1855 | OR4K1     | ENST00000285600 | p.P284H | c.851C>A | Unverified | AAC | CCC | ATC | 2 | C | A |
| TCGA-29-1775 | OR4N2     | ENST00000315947 | p.T134N | c.401C>A | Unverified | CCT | ACT | GTC | 2 | C | A |
| TCGA-24-1469 | OR4N4     | ENST00000328795 | p.S133* | c.398C>A | Verified   | TGT | TCA | ACT | 2 | C | A |
| TCGA-24-2290 | OR4N4     | ENST00000328795 | p.I31I  | c.93C>A  | Verified   | CTG | ATC | TTA | 3 | C | A |
| TCGA-24-2290 | OR4N4     | ENST00000328795 | p.I31I  | c.93C>A  | Verified   | CTG | ATC | TTA | 3 | C | A |
| TCGA-13-0884 | OR4N5     | ENST00000333629 | p.P284H | c.851C>A | Verified   | AAC | CCT | GTT | 2 | C | A |
| TCGA-61-1906 | OR51B6    | ENST00000380219 | p.H242N | c.724C>A | Unverified | TCT | CAT | ATC | 1 | C | A |
| TCGA-61-1906 | OR51B6    | ENST00000380219 | p.H242N | c.724C>A | Unverified | TCT | CAT | ATC | 1 | C | A |
| TCGA-24-2280 | OR52A4    | ENST00000380369 | p.T146N | c.437C>A | Unverified | GTC | ACT | TAT | 2 | C | A |
| TCGA-24-1843 | OR52E8    | ENST00000537935 | p.L165M | c.493C>A | Unverified | CCA | CTG | GTG | 1 | C | A |
| TCGA-24-1431 | OR56A1    | ENST00000316650 | p.P8T   | c.22C>A  | Verified   | TCA | CCC | AGC | 1 | C | A |

|              |           |                 |         |           |            |     |     |     |   |   |   |
|--------------|-----------|-----------------|---------|-----------|------------|-----|-----|-----|---|---|---|
| TCGA-29-1763 | OR5B17    | ENST00000357377 | p.D50E  | c.150C>A  | Unverified | CTG | GAC | TCT | 3 | C | A |
| TCGA-13-1505 | OR5D13    | ENST00000361760 | p.A3E   | c.8C>A    | Verified   | ATG | GCA | TCT | 2 | C | A |
| TCGA-13-0807 | OR5D14    | ENST00000335605 | p.P81T  | c.241C>A  | Verified   | ACT | CCC | AAG | 1 | C | A |
| TCGA-13-1497 | OR5H15    | ENST00000356526 | p.L255I | c.763C>A  | Verified   | CCC | CTT | CTC | 1 | C | A |
| TCGA-29-1763 | OR5K4     | ENST00000354924 | p.L104L | c.312C>A  | Unverified | TTT | CTC | TGT | 3 | C | A |
| TCGA-09-2050 | OR5P2     | ENST00000329434 | p.P75H  | c.224C>A  | Verified   | ACA | CCC | AAC | 2 | C | A |
| TCGA-61-1998 | OR5T2     | ENST00000313264 | p.T357N | c.1070C>A | Verified   | CAT | ACT | AAA | 2 | C | A |
| TCGA-13-1497 | OR6A2     | ENST00000332601 | p.P215Q | c.644C>A  | Verified   | GGG | CCA | CTC | 2 | C | A |
| TCGA-24-2280 | OR6Q1     | ENST00000302622 | p.T109T | c.327C>A  | Unverified | TTC | ACC | TTT | 3 | C | A |
| TCGA-13-0893 | OR6V1     | ENST00000418316 | p.T244K | c.731C>A  | Verified   | CTC | ACA | CTG | 2 | C | A |
| TCGA-29-1761 | OR7E5P    | ENST00000360245 | p.P46T  | c.136C>A  | Unverified | GTC | CCC | AAG | 1 | C | A |
| TCGA-13-0887 | OR7G1     | ENST00000293614 | p.V281V | c.843C>A  | Verified   | GTG | GTC | CCT | 3 | C | A |
| TCGA-24-1843 | OR8A1     | ENST00000284287 | p.I168I | c.504C>A  | Unverified | GCC | ATC | GGA | 3 | C | A |
| TCGA-61-1914 | OR8B12    | ENST00000306842 | p.H226Q | c.678C>A  | Unverified | CTA | CAC | AAC | 3 | C | A |
| TCGA-13-0919 | OR8B2     | ENST00000375013 | p.V37V  | c.111C>A  | Unverified | ATT | GTC | ACC | 3 | C | A |
| TCGA-09-2044 | OR8H1     | ENST00000313022 | p.T223T | c.669C>A  | Verified   | TCT | ACC | ATC | 3 | C | A |
| TCGA-29-1699 | OR8I2     | ENST00000302124 | p.Q234K | c.700C>A  | Unverified | AGG | CAG | AAG | 1 | C | A |
| TCGA-23-2077 | OR8K3     | ENST00000312711 | p.I20I  | c.60C>A   | Verified   | GAT | ATC | GCT | 3 | C | A |
| TCGA-13-0884 | OR9Q2     | ENST00000311591 | p.T105N | c.314C>A  | Verified   | TTC | ACC | TTC | 2 | C | A |
| TCGA-13-0916 | OSR1      | ENST00000272223 | p.T261N | c.782C>A  | Verified   | AAA | ACC | TCC | 2 | C | A |
| TCGA-24-1846 | OTOL1     | ENST00000327928 | p.Q440K | c.1318C>A | Unverified | GAC | CAA | GTC | 1 | C | A |
| TCGA-30-1857 | OXER1     | ENST00000378661 | p.S53Y  | c.158C>A  | Unverified | CTC | TCC | TCC | 2 | C | A |
| TCGA-29-2427 | P2RX2     | ENST00000343948 | p.G446G | c.1338C>A | Unverified | TCA | GGC | CAG | 3 | C | A |
| TCGA-61-1906 | P2RY1     | ENST00000305097 | p.I118I | c.354C>A  | Unverified | TGG | ATC | TTC | 3 | C | A |
| TCGA-61-1906 | P2RY1     | ENST00000305097 | p.I118I | c.354C>A  | Unverified | TGG | ATC | TTC | 3 | C | A |
| TCGA-24-1469 | P2RY10    | ENST00000544091 | p.Q233K | c.697C>A  | Verified   | ttc | caa | ggg | 1 | C | A |
| TCGA-24-1844 | PABPC5    | ENST00000312600 | p.A158D | c.473C>A  | Unverified | gct | gcc | aat | 2 | C | A |
| TCGA-29-1776 | PAG1      | ENST00000220597 | p.A376E | c.1127C>A | Unverified | CCA | GCA | GGG | 2 | C | A |
| TCGA-13-1488 | PALM2     | ENST00000374531 | p.S129Y | c.386C>A  | Verified   | TTC | TCC | AGT | 2 | C | A |
| TCGA-13-1488 | PALM2-AKA | ENST00000374530 | p.S127Y | c.380C>A  | Verified   | TTC | TCC | AGT | 2 | C | A |
| TCGA-10-0930 | PARP9     | ENST00000360356 | p.I33I  | c.99C>A   | Verified   | CAG | ATC | TTT | 3 | C | A |
| TCGA-10-0930 | PARP9     | ENST00000360356 | p.I33I  | c.99C>A   | Verified   | CAG | ATC | TTT | 3 | C | A |
| TCGA-61-1900 | PASD1     | ENST00000370357 | p.L532M | c.1594C>A | Unverified | AAG | CTG | CAG | 1 | C | A |
| TCGA-61-1900 | PASD1_ENS | ENST00000370357 | p.L532M | c.1594C>A | Unverified | AAG | CTG | CAG | 1 | C | A |

|              |            |                 |          |           |            |     |     |     |   |   |   |
|--------------|------------|-----------------|----------|-----------|------------|-----|-----|-----|---|---|---|
| TCGA-61-2102 | PASK       | ENST00000234040 | p.T1161N | c.3482C>A | Verified   | TAT | ACT | TTT | 2 | C | A |
| TCGA-29-1763 | PCCA       | ENST00000376285 | p.R390S  | c.1168C>A | Unverified | att | cgc | atc | 1 | C | A |
| TCGA-04-1342 | PCDH17     | ENST00000377918 | p.T837N  | c.2510C>A | Unverified | TTC | ACC | GGA | 2 | C | A |
| TCGA-24-1470 | PCDH20     | ENST00000358674 | p.R572R  | c.1714C>A | Verified   | GAC | CGA | GAA | 1 | C | A |
| TCGA-09-2056 | PCDHB2     | ENST00000194155 | p.T152N  | c.455C>A  | Verified   | GGA | ACT | ACT | 2 | C | A |
| TCGA-23-1114 | PCDHB7     | ENST00000231137 | p.Q10K   | c.28C>A   | Unverified | GTG | CAG | AAA | 1 | C | A |
| TCGA-29-1777 | PCDHG_clus | ENST00000394576 | p.N127K  | c.381C>A  | Unverified | ATT | AAC | GAT | 3 | C | A |
| TCGA-61-1737 | PCDHGA12   | ENST00000252085 | p.N545K  | c.1635C>A | Unverified | AGC | AAC | GTG | 3 | C | A |
| TCGA-61-1737 | PCDHGA12_  | ENST00000252085 | p.N545K  | c.1635C>A | Unverified | AGC | AAC | GTG | 3 | C | A |
| TCGA-29-1777 | PCDHGA2    | ENST00000305759 | p.N127K  | c.381C>A  | Unverified | ATT | AAC | GAT | 3 | C | A |
| TCGA-13-1498 | PCDHGA5    | ENST00000518069 | p.L632M  | c.1894C>A | Verified   | GCC | CTG | CTG | 1 | C | A |
| TCGA-04-1361 | PCDHGC5    | ENST00000252087 | p.P307T  | c.919C>A  | Verified   | GGT | CCC | ATA | 1 | C | A |
| TCGA-04-1361 | PCDHGC5    | ENST00000252087 | p.P307T  | c.919C>A  | Verified   | GGT | CCC | ATA | 1 | C | A |
| TCGA-04-1361 | PCDHGC5_E  | ENST00000252087 | p.P307T  | c.919C>A  | Verified   | GGT | CCC | ATA | 1 | C | A |
| TCGA-04-1361 | PCDHGC5_E  | ENST00000252087 | p.P307T  | c.919C>A  | Verified   | GGT | CCC | ATA | 1 | C | A |
| TCGA-13-1488 | PCLO       | ENST00000333891 | p.S770*  | c.2309C>A | Verified   | TCA | TCA | TCA | 2 | C | A |
| TCGA-13-0760 | PCSK9      | ENST00000302118 | p.P404Q  | c.1211C>A | Verified   | GAG | CCG | GAG | 2 | C | A |
| TCGA-04-1361 | PDCD8      | ENST00000287295 | p.P488P  | c.1464C>A | Verified   | ggc | ccc | gat | 3 | C | A |
| TCGA-04-1361 | PDCD8      | ENST00000287295 | p.P488P  | c.1464C>A | Verified   | ggc | ccc | gat | 3 | C | A |
| TCGA-24-2280 | PDE11A     | ENST00000286063 | p.Q360K  | c.1078C>A | Unverified | ATG | CAG | ATG | 1 | C | A |
| TCGA-61-1907 | PDE11A     | ENST00000286063 | p.H199N  | c.595C>A  | Unverified | AAG | CAT | AAT | 1 | C | A |
| TCGA-24-1469 | PDE11A     | ENST00000286063 | p.A918D  | c.2753C>A | Verified   | ACT | GCC | TCA | 2 | C | A |
| TCGA-04-1655 | PDE11A     | ENST00000286063 | p.V407V  | c.1221C>A | Unverified | ATT | GTC | AAG | 3 | C | A |
| TCGA-04-1655 | PDE11A_EN  | ENST00000358450 | p.V157V  | c.471C>A  | Unverified | ATT | GTC | AAG | 3 | C | A |
| TCGA-04-1362 | PDE2A      | ENST00000334456 | p.Q307K  | c.919C>A  | Verified   | ATC | CAG | CTG | 1 | C | A |
| TCGA-09-1665 | PDE8B      | ENST00000264917 | p.G147G  | c.441C>A  | Unverified | GAT | GGC | TTC | 3 | C | A |
| TCGA-24-1844 | PDK3       | ENST00000379162 | p.D287E  | c.861C>A  | Unverified | AGT | GAC | CTA | 3 | C | A |
| TCGA-24-1844 | PDK3_ENST  | ENST00000441463 | p.D287E  | c.861C>A  | Unverified | AGT | GAC | CTA | 3 | C | A |
| TCGA-29-1768 | PDLIM3     | ENST00000284770 | p.H238N  | c.712C>A  | Unverified | CTC | CAC | GAC | 1 | C | A |
| TCGA-29-1768 | PDLIM3_EN  | ENST00000284771 | p.H190N  | c.568C>A  | Unverified | CTC | CAC | GAC | 1 | C | A |
| TCGA-24-2035 | PDLIM4     | ENST00000253754 | p.T114K  | c.341C>A  | Unverified | CCA | ACA | ACC | 2 | C | A |
| TCGA-13-0916 | PDZRN4     | ENST00000539469 | p.G157G  | c.471C>A  | Verified   | CTG | GGC | CTG | 3 | C | A |
| TCGA-13-1498 | PELP1      | ENST00000456564 | p.P544T  | c.1630C>A | Verified   | GCC | CCC | AAG | 1 | C | A |
| TCGA-13-0761 | PEX16      | ENST00000241041 | p.L135L  | c.405C>A  | Verified   | GGC | CTC | CAG | 3 | C | A |

|              |            |                 |          |           |            |     |     |     |   |   |   |
|--------------|------------|-----------------|----------|-----------|------------|-----|-----|-----|---|---|---|
| TCGA-13-0761 | PEX16      | ENST00000241041 | p.L135L  | c.405C>A  | Verified   | GGC | CTC | CAG | 3 | C | A |
| TCGA-10-0930 | PGA3       | ENST00000325558 | p.P67P   | c.201C>A  | Verified   | CAG | CCC | CTG | 3 | C | A |
| TCGA-10-0930 | PGA3       | ENST00000325558 | p.P67P   | c.201C>A  | Verified   | CAG | CCC | CTG | 3 | C | A |
| TCGA-30-1856 | PGAP1      | ENST00000354764 | p.Q387K  | c.1159C>A | Unverified | TGT | CAG | AGC | 1 | C | A |
| TCGA-61-1900 | PGC        | ENST00000373025 | p.Q246K  | c.736C>A  | Unverified | ACC | CAG | GAA | 1 | C | A |
| TCGA-23-1031 | PGLYRP2    | ENST00000340880 | p.P567Q  | c.1700C>A | Verified   | CCC | CCA | AGG | 2 | C | A |
| TCGA-04-1331 | PGLYRP3    | ENST00000290722 | p.S229Y  | c.686C>A  | Verified   | CAG | TCC | TTT | 2 | C | A |
| TCGA-24-1845 | PHF3       | ENST00000262043 | p.S341Y  | c.1022C>A | Unverified | gga | tct | tct | 2 | C | A |
| TCGA-24-1844 | PHKA1      | ENST00000373542 | p.P1026T | c.3076C>A | Unverified | TCA | CCT | GGA | 1 | C | A |
| TCGA-24-2280 | PHLDB2     | ENST00000412622 | p.P885P  | c.2655C>A | Unverified | CTG | CCC | CTA | 3 | C | A |
| TCGA-10-0930 | PHOX2B     | ENST00000226382 | p.S7Y    | c.20C>A   | Verified   | TAT | TCT | TAC | 2 | C | A |
| TCGA-10-0930 | PHOX2B     | ENST00000226382 | p.S7Y    | c.20C>A   | Verified   | TAT | TCT | TAC | 2 | C | A |
| TCGA-29-1701 | PI15       | ENST00000260113 | p.S30*   | c.89C>A   | Unverified | GAC | TCA | TCC | 2 | C | A |
| TCGA-13-1512 | PIK3CA     | NM_006218.1     | p.I800I  | c.2400C>A | Verified   | atc | atc | ttt | 3 | C | A |
| TCGA-09-1674 | PIK3CB     | ENST00000477593 | p.A875D  | c.2624C>A | Unverified | gca | gcc | ttc | 2 | C | A |
| TCGA-61-1737 | PIK3CD     | ENST00000377346 | p.N464K  | c.1392C>A | Unverified | CCC | AAC | ACG | 3 | C | A |
| TCGA-13-1509 | PIK3CG     | ENST00000440650 | p.L379I  | c.1135C>A | Verified   | GAC | CTC | ACA | 1 | C | A |
| TCGA-29-1762 | PIK3R1     | ENST00000521381 | p.S565R  | c.1695C>A | Unverified | aac | agc | att | 3 | C | A |
| TCGA-29-1762 | PIK3R1_ENS | ENST00000320694 | p.S265R  | c.795C>A  | Unverified | AAC | AGC | ATT | 3 | C | A |
| TCGA-29-1762 | PIK3R1_ENS | ENST00000336483 | p.S295R  | c.885C>A  | Unverified | AAC | AGC | ATT | 3 | C | A |
| TCGA-23-1021 | PIKFYVE    | ENST00000264380 | p.P919H  | c.2756C>A | Verified   | CCT | CCT | GAG | 2 | C | A |
| TCGA-23-1029 | PIKFYVE    | ENST00000264380 | p.P747H  | c.2240C>A | Unverified | CGA | CCC | ACC | 2 | C | A |
| TCGA-04-1651 | PINK1      | ENST00000321556 | p.R312R  | c.934C>A  | Unverified | ggc | cgg | acg | 1 | C | A |
| TCGA-04-1651 | PINK1      | ENST00000321556 | p.R312R  | c.934C>A  | Unverified | ggc | cgg | acg | 1 | C | A |
| TCGA-04-1362 | PKD1L1     | ENST00000289672 | p.P780T  | c.2338C>A | Verified   | GCC | CCT | GTC | 1 | C | A |
| TCGA-13-0923 | PKD1L1     | ENST00000289672 | p.S2504* | c.7511C>A | Verified   | CCC | TCA | TCC | 2 | C | A |
| TCGA-13-0791 | PKD2L1     | ENST00000318222 | p.L391M  | c.1171C>A | Verified   | GAC | CTG | GTG | 1 | C | A |
| TCGA-29-1693 | PKD2L1     | ENST00000318222 | p.V307V  | c.921C>A  | Unverified | TCA | GTC | TAC | 3 | C | A |
| TCGA-29-1695 | PKD2L2     | ENST00000290431 | p.Y19*   | c.57C>A   | Unverified | CAT | TAC | AGA | 3 | C | A |
| TCGA-24-1417 | PLA2G4C    | ENST00000413144 | p.T123T  | c.369C>A  | Verified   | AAA | ACC | ATC | 3 | C | A |
| TCGA-25-1313 | PLA2G4F    | ENST00000382396 | p.S308R  | c.924C>A  | Verified   | ATG | AGC | TCC | 3 | C | A |
| TCGA-61-1904 | PLEK       | ENST00000234313 | p.V161V  | c.483C>A  | Unverified | TGC | GTC | ATT | 3 | C | A |
| TCGA-29-1785 | PLEKHA7    | ENST00000355661 | p.S363Y  | c.1088C>A | Unverified | AGG | TCT | CCG | 2 | C | A |
| TCGA-29-1785 | PLEKHA7    | ENST00000355661 | p.S363Y  | c.1088C>A | Unverified | AGG | TCT | CCG | 2 | C | A |

|              |            |                     |          |           |            |     |     |     |   |   |   |
|--------------|------------|---------------------|----------|-----------|------------|-----|-----|-----|---|---|---|
| TCGA-24-2288 | PLEKHG1    | ENST00000358517     | p.P804T  | c.2410C>A | Unverified | ACT | CCC | GAT | 1 | C | A |
| TCGA-23-1029 | PLEKHH2    | ENST00000282406     | p.S1102* | c.3305C>A | Unverified | CCC | TCA | AGG | 2 | C | A |
| TCGA-23-1124 | PLEKHO2    | ENST00000323544     | p.P402P  | c.1206C>A | Verified   | CAT | CCC | TTG | 3 | C | A |
| TCGA-29-1702 | PLG        | ENST00000308192     | p.D328E  | c.984C>A  | Unverified | CCT | GAC | GGA | 3 | C | A |
| TCGA-61-1900 | PLK4       | ENST00000270861     | p.S718Y  | c.2153C>A | Unverified | AAT | TCT | CCT | 2 | C | A |
| TCGA-24-1844 | PLXNA2     | ENST00000367033     | p.L1681I | c.5041C>A | Unverified | CGG | CTA | CTG | 1 | C | A |
| TCGA-24-1422 | PNMA1      | ENST00000316836     | p.A313D  | c.938C>A  | Unverified | GGG | GCT | GGG | 2 | C | A |
| TCGA-13-0916 | POGK       | ENST00000367875     | p.Y511*  | c.1533C>A | Unverified | GTC | TAC | AAG | 3 | C | A |
| TCGA-29-1777 | POLD2      | ENST00000406581     | p.L118L  | c.354C>A  | Unverified | CTG | CTC | CCC | 3 | C | A |
| TCGA-29-1777 | POLD2_ENS  | ENST00000406581     | p.L118L  | c.354C>A  | Unverified | CTG | CTC | CCC | 3 | C | A |
| TCGA-24-1104 | POLE       | ENST00000320574     | p.T2245N | c.6734C>A | Verified   | CTC | ACC | ATC | 2 | C | A |
| TCGA-13-0884 | POLI       | NM_007195.1         | p.T65T   | c.195C>A  | Verified   | gtt | acc | tgc | 3 | C | A |
| TCGA-13-1481 | POTEA      | ENST00000354247     | p.A135D  | c.404C>A  | Verified   | ACA | GCT | CTG | 2 | C | A |
| TCGA-13-1488 | POTEJ      | ENST00000409602     | p.Q297K  | c.889C>A  | Unverified | TCT | CAA | GAT | 1 | C | A |
| TCGA-13-1488 | POTEJ_ENST | ENST00000409602_v68 | p.Q297K  | c.889C>A  | Unverified | TCT | CAA | GAT | 1 | C | A |
| TCGA-24-0975 | POU2F2     | ENST00000389341     | p.S433R  | c.1299C>A | Unverified | ccc | agc | cct | 3 | C | A |
| TCGA-61-1910 | PPAPDC3    | ENST00000372264     | p.L267L  | c.801C>A  | Unverified | ATG | CTC | ATC | 3 | C | A |
| TCGA-61-1725 | PPARGC1B   | ENST00000309241     | p.L848I  | c.2542C>A | Unverified | CAG | CTC | TGT | 1 | C | A |
| TCGA-24-2288 | PPARGC1B   | ENST00000309241     | p.D51E   | c.153C>A  | Unverified | AGC | GAC | TTT | 3 | C | A |
| TCGA-13-0904 | PPEF2      | ENST00000286719     | p.C377*  | c.1131C>A | Verified   | ccc | tgc | agc | 3 | C | A |
| TCGA-23-1117 | PPP1R10    | ENST00000376511     | p.S327R  | c.981C>A  | Verified   | acg | agc | aca | 3 | C | A |
| TCGA-23-1117 | PPP1R10    | ENST00000376511     | p.S327R  | c.981C>A  | Verified   | acg | agc | aca | 3 | C | A |
| TCGA-61-1910 | PPP1R3A    | NM_002711.2         | p.A67D   | c.200C>A  | Unverified | ttt | gct | gat | 2 | C | A |
| TCGA-61-1725 | PPP2R5E    | ENST00000337537     | p.D78E   | c.234C>A  | Unverified | atg | gac | acg | 3 | C | A |
| TCGA-23-1029 | PRAM1      | ENST00000423345     | p.P110H  | c.329C>A  | Unverified | CCG | CCT | GAG | 2 | C | A |
| TCGA-24-2280 | PRAMEF10   | ENST00000235347     | p.A240D  | c.719C>A  | Unverified | TTA | GCC | TTC | 2 | C | A |
| TCGA-04-1336 | PRAMEF12   | ENST00000357726     | p.L331M  | c.991C>A  | Verified   | ACA | CTG | ACC | 1 | C | A |
| TCGA-23-1114 | PRDM5      | ENST00000264808     | p.R77R   | c.229C>A  | Unverified | CCA | CGG | CAC | 1 | C | A |
| TCGA-23-1117 | PRICKLE2   | ENST00000295902     | p.L624I  | c.1870C>A | Verified   | CAG | CTC | AGC | 1 | C | A |
| TCGA-23-1117 | PRICKLE2   | ENST00000295902     | p.L624I  | c.1870C>A | Verified   | CAG | CTC | AGC | 1 | C | A |
| TCGA-29-1763 | PRKD1      | ENST00000331968     | p.T833T  | c.2499C>A | Unverified | AAG | ACC | TTG | 3 | C | A |
| TCGA-29-1763 | PRKD1_ENS  | ENST00000331968     | p.T833T  | c.2499C>A | Unverified | AAG | ACC | TTG | 3 | C | A |
| TCGA-29-1781 | PRLHR      | ENST00000369169     | p.P49T   | c.145C>A  | Unverified | ACG | CCC | TTC | 1 | C | A |
| TCGA-24-1422 | PRLHR      | ENST00000369169     | p.A288D  | c.863C>A  | Unverified | TTC | GCC | GTC | 2 | C | A |



|              |            |                 |          |           |            |     |     |     |   |   |   |
|--------------|------------|-----------------|----------|-----------|------------|-----|-----|-----|---|---|---|
| TCGA-24-1103 | PRLR       | ENST00000382002 | p.L117I  | c.349C>A  | Verified   | GAA | CTT | TAT | 1 | C | A |
| TCGA-13-0913 | PRODH2     | ENST00000301175 | p.N207K  | c.621C>A  | Verified   | GGG | AAC | CTC | 3 | C | A |
| TCGA-13-0755 | PROM1      | ENST00000447510 | p.N272K  | c.816C>A  | Verified   | GAG | AAC | ATG | 3 | C | A |
| TCGA-13-1499 | PROM1      | ENST00000447510 | p.H681Q  | c.2043C>A | Verified   | ATT | CAC | CAG | 3 | C | A |
| TCGA-13-1408 | PRR16      | ENST00000379551 | p.P84Q   | c.251C>A  | Verified   | CCC | CCA | GCA | 2 | C | A |
| TCGA-29-1691 | PRR21      | ENST00000408934 | p.L92I   | c.274C>A  | Unverified | CCT | CTT | CAC | 1 | C | A |
| TCGA-24-1850 | PRR23C     | ENST00000413199 | p.F219L  | c.657C>A  | Unverified | GAA | TTC | CAT | 3 | C | A |
| TCGA-61-2008 | PRRC2B     | ENST00000357304 | p.A54D   | c.161C>A  | Verified   | GCA | GCC | CGG | 2 | C | A |
| TCGA-23-1029 | PRUNE      | ENST00000271620 | p.C274*  | c.822C>A  | Unverified | TTC | TGC | CAG | 3 | C | A |
| TCGA-29-1691 | PSD3_ENST0 | ENST00000327040 | p.D450E  | c.1350C>A | Unverified | TTG | GAC | AAC | 3 | C | A |
| TCGA-04-1336 | PSKH2      | ENST00000276616 | p.T252K  | c.755C>A  | Verified   | ATC | ACA | TAT | 2 | C | A |
| TCGA-24-1843 | PSMF1      | ENST00000335877 | p.P245P  | c.735C>A  | Unverified | GAC | CCC | TTT | 3 | C | A |
| TCGA-04-1652 | PSTK       | ENST00000368887 | p.R16R   | c.46C>A   | Unverified | CCG | CGG | AAA | 1 | C | A |
| TCGA-04-1652 | PSTK       | ENST00000368887 | p.R16R   | c.46C>A   | Unverified | CCG | CGG | AAA | 1 | C | A |
| TCGA-24-1845 | PTCHD3     | ENST00000438700 | p.R409R  | c.1225C>A | Unverified | ATA | CGA | AAC | 1 | C | A |
| TCGA-13-0887 | PTCRA      | ENST00000304672 | p.P54T   | c.160C>A  | Verified   | GCA | CCC | CCT | 1 | C | A |
| TCGA-24-1431 | PTDSS1     | ENST00000517309 | p.H411Q  | c.1233C>A | Verified   | GGT | CAC | CGA | 3 | C | A |
| TCGA-13-1496 | PTGDS      | ENST00000371625 | p.Y128*  | c.384C>A  | Verified   | CAG | TAC | GCG | 3 | C | A |
| TCGA-13-0913 | PTGFR      | ENST00000370756 | p.H143N  | c.427C>A  | Verified   | TTT | CAT | TCT | 1 | C | A |
| TCGA-13-0913 | PTGFR_ENST | ENST00000370758 | p.H143N  | c.427C>A  | Verified   | TTT | CAT | TCT | 1 | C | A |
| TCGA-29-1763 | PTH2R      | ENST00000272847 | p.H510Q  | c.1530C>A | Unverified | TTC | CAC | GAG | 3 | C | A |
| TCGA-09-2044 | PTPN13     | ENST00000436978 | p.T2422N | c.7265C>A | Verified   | GGG | ACC | CTG | 2 | C | A |
| TCGA-24-1422 | PTPN21     | ENST00000328736 | p.P419H  | c.1256C>A | Verified   | AAC | CCT | AGC | 2 | C | A |
| TCGA-04-1338 | PTPN3      | ENST00000394831 | p.D811E  | c.2433C>A | Unverified | CCT | GAC | CAC | 3 | C | A |
| TCGA-24-1616 | PTPRC      | ENST00000442510 | p.P160Q  | c.479C>A  | Verified   | gac | cca | gtt | 2 | C | A |
| TCGA-13-0920 | PTPRG      | ENST00000474889 | p.Q856K  | c.2566C>A | Verified   | GTC | CAG | CGC | 1 | C | A |
| TCGA-29-1763 | PTPRH      | ENST00000376350 | p.P210Q  | c.629C>A  | Unverified | AAC | CCA | GTG | 2 | C | A |
| TCGA-23-1110 | PTPRK      | ENST00000368226 | p.T1248K | c.3743C>A | Verified   | gtc | aca | caa | 2 | C | A |
| TCGA-13-0761 | PTPRT      | NM_133170.2     | p.T1271N | c.3812C>A | Verified   | gtc | acc | cag | 2 | C | A |
| TCGA-13-0761 | PTPRT      | NM_133170.2     | p.T1271N | c.3812C>A | Verified   | gtc | acc | cag | 2 | C | A |
| TCGA-04-1356 | PTPRU      | ENST00000345512 | p.H928Q  | c.2784C>A | Verified   | CGG | CAC | CGA | 3 | C | A |
| TCGA-61-1737 | PTPRZ1     | ENST00000393386 | p.Q387K  | c.1159C>A | Unverified | CTT | CAG | ATA | 1 | C | A |
| TCGA-61-1910 | PTPRZ1     | ENST00000393386 | p.S548Y  | c.1643C>A | Unverified | AGA | TCT | CCA | 2 | C | A |
| TCGA-23-2078 | PTPRZ1     | ENST00000393386 | p.N1746K | c.5238C>A | Verified   | TCC | AAC | CAC | 3 | C | A |

|              |            |                 |          |           |            |     |     |     |   |   |   |
|--------------|------------|-----------------|----------|-----------|------------|-----|-----|-----|---|---|---|
| TCGA-61-1737 | PTPRZ1_EN  | ENST00000393386 | p.Q387K  | c.1159C>A | Unverified | CTT | CAG | ATA | 1 | C | A |
| TCGA-61-1910 | PTPRZ1_EN  | ENST00000393386 | p.S548Y  | c.1643C>A | Unverified | AGA | TCT | CCA | 2 | C | A |
| TCGA-13-0916 | PXN        | ENST00000424649 | p.S502Y  | c.1505C>A | Verified   | TGT | TCT | GGC | 2 | C | A |
| TCGA-24-1850 | PZP        | ENST00000261336 | p.A1067E | c.3200C>A | Unverified | GAA | GCA | CAC | 2 | C | A |
| TCGA-24-1850 | PZP_ENST0C | ENST00000381997 | p.A853E  | c.2558C>A | Unverified | GAA | GCA | CAC | 2 | C | A |
| TCGA-13-1509 | Q6YL47_HU  | ENST00000322367 | p.A1300D | c.3899C>A | Verified   | AAC | GCC | AAC | 2 | C | A |
| TCGA-61-1900 | Q8NH47_HL  | ENST00000319748 | p.I162I  | c.486C>A  | Unverified | TGC | ATC | TTT | 3 | C | A |
| TCGA-13-0807 | Q9C0K3_HU  | ENST00000252071 | p.D141E  | c.423C>A  | Verified   | ATA | GAC | GTT | 3 | C | A |
| TCGA-13-1488 | Q9Y6V0-3   | ENST00000333891 | p.S716*  | c.2147C>A | Verified   | TCA | TCA | TCA | 2 | C | A |
| TCGA-13-1408 | QSER1      | ENST00000399302 | p.S1482Y | c.4445C>A | Unverified | CCT | TCC | GTG | 2 | C | A |
| TCGA-13-1481 | QSOX2      | ENST00000358701 | p.F473L  | c.1419C>A | Verified   | ACC | TTC | TTT | 3 | C | A |
| TCGA-29-1770 | RAB34      | ENST00000301043 | p.L68I   | c.202C>A  | Unverified | TGC | CTC | ATT | 1 | C | A |
| TCGA-29-1770 | RAB34_ENS  | ENST00000453384 | p.L126I  | c.376C>A  | Unverified | TGC | CTC | ATT | 1 | C | A |
| TCGA-29-1763 | RANBP6     | ENST00000259569 | p.I566I  | c.1698C>A | Unverified | act | atc | gag | 3 | C | A |
| TCGA-61-1998 | RAPGEF6_EI | ENST00000509018 | p.A1588E | c.4763C>A | Verified   | GAT | GCA | GAT | 2 | C | A |
| TCGA-23-1032 | RAPH1      | ENST00000319170 | p.A593A  | c.1779C>A | Verified   | AAG | GCC | AGA | 3 | C | A |
| TCGA-13-1489 | RB1        | ENST00000267163 | p.Q702K  | c.2104C>A | Verified   | GAC | CAA | ATT | 1 | C | A |
| TCGA-04-1362 | RBBP4      | ENST00000373493 | p.A82D   | c.245C>A  | Verified   | ATA | GCC | AGT | 2 | C | A |
| TCGA-24-2290 | RBFA       | ENST00000306735 | p.D132E  | c.396C>A  | Verified   | CCA | GAC | TTC | 3 | C | A |
| TCGA-24-2290 | RBFA       | ENST00000306735 | p.D132E  | c.396C>A  | Verified   | CCA | GAC | TTC | 3 | C | A |
| TCGA-29-1775 | RBMS3_ENS  | ENST00000383767 | p.I78I   | c.234C>A  | Unverified | CTA | ATC | AAG | 3 | C | A |
| TCGA-20-1687 | RFFL       | ENST00000394597 | p.P32T   | c.94C>A   | Unverified | AAC | CCT | GGG | 1 | C | A |
| TCGA-29-1691 | RGAG1      | ENST00000465301 | p.P900Q  | c.2699C>A | Unverified | TCA | CCA | CTA | 2 | C | A |
| TCGA-61-1899 | RGS1       | NM_002922.3     | p.Q80K   | c.238C>A  | Unverified | aac | caa | act | 1 | C | A |
| TCGA-61-1899 | RGS1_ENSTC | ENST00000367459 | p.Q93K   | c.277C>A  | Unverified | AAC | CAA | ACT | 1 | C | A |
| TCGA-24-1847 | RGS9       | ENST00000262406 | p.A462D  | c.1385C>A | Unverified | GCA | GCC | AAC | 2 | C | A |
| TCGA-13-0923 | RHOC       | ENST00000339083 | p.D59E   | c.177C>A  | Verified   | tgg | gac | aca | 3 | C | A |
| TCGA-13-1489 | RIMS1      | ENST00000521978 | p.H1085N | c.3253C>A | Verified   | CTT | CAT | CAT | 1 | C | A |
| TCGA-29-1703 | RIMS2_ENST | ENST00000507740 | p.L32I   | c.94C>A   | Unverified | GAG | CTT | TTT | 1 | C | A |
| TCGA-61-1906 | RLBP1      | ENST00000268125 | p.Y124*  | c.372C>A  | Unverified | CAG | TAC | CCT | 3 | C | A |
| TCGA-61-1906 | RLBP1      | ENST00000268125 | p.Y124*  | c.372C>A  | Unverified | CAG | TAC | CCT | 3 | C | A |
| TCGA-61-2095 | RNASE1     | ENST00000397967 | p.S141R  | c.423C>A  | Unverified | GGG | AGC | CCA | 3 | C | A |
| TCGA-24-2280 | RNASE13    | ENST00000382951 | p.A77D   | c.230C>A  | Unverified | CAT | GCC | CCT | 2 | C | A |
| TCGA-61-2095 | RNF213     | ENST00000336301 | p.P1950T | c.5848C>A | Unverified | AAG | CCC | AGT | 1 | C | A |

|              |            |                     |          |            |            |     |     |     |   |   |   |
|--------------|------------|---------------------|----------|------------|------------|-----|-----|-----|---|---|---|
| TCGA-61-2095 | RNF213_EN! | ENST00000411702     | p.P3926T | c.11776C>A | Unverified | AAG | CCC | AGT | 1 | C | A |
| TCGA-04-1356 | RNF31      | ENST00000324103     | p.L398I  | c.1192C>A  | Verified   | CCC | CTT | CAG | 1 | C | A |
| TCGA-25-2393 | RNF43      | ENST00000407977     | p.P118T  | c.352C>A   | Verified   | CGC | CCC | TGC | 1 | C | A |
| TCGA-61-1740 | ROBO2      | ENST00000461745     | p.F357L  | c.1071C>A  | Unverified | CTT | TTC | CCA | 3 | C | A |
| TCGA-61-1740 | ROBO2_ENS  | ENST00000487694     | p.F373L  | c.1119C>A  | Unverified | CTT | TTC | CCA | 3 | C | A |
| TCGA-13-0755 | ROBO4      | ENST00000306534     | p.A495D  | c.1484C>A  | Verified   | CGA | GCT | AGG | 2 | C | A |
| TCGA-13-1497 | ROS1       | ENST00000368508     | p.S370Y  | c.1109C>A  | Verified   | ATT | TCT | TCT | 2 | C | A |
| TCGA-04-1347 | ROS1       | ENST00000368508     | p.G559G  | c.1677C>A  | Verified   | CCA | GGC | CGC | 3 | C | A |
| TCGA-29-1696 | RP11-166B2 | ENST00000399147     | p.L126I  | c.376C>A   | Unverified | ACT | CTA | CGG | 1 | C | A |
| TCGA-29-1696 | RP11-166B2 | ENST00000399147     | p.L126I  | c.376C>A   | Unverified | ACT | CTA | CGG | 1 | C | A |
| TCGA-29-1696 | RP11-166B2 | ENST00000399147_v68 | p.L126I  | c.376C>A   | Unverified | ACT | CTA | CGG | 1 | C | A |
| TCGA-29-1696 | RP11-166B2 | ENST00000399147_v68 | p.L126I  | c.376C>A   | Unverified | ACT | CTA | CGG | 1 | C | A |
| TCGA-29-1690 | RP11-231C1 | ENST00000524087     | p.P567P  | c.1701C>A  | Unverified | ACT | CCC | CTT | 3 | C | A |
| TCGA-29-1690 | RP11-231C1 | ENST00000524087_v68 | p.P567P  | c.1701C>A  | Unverified | ACT | CCC | CTT | 3 | C | A |
| TCGA-13-0885 | RP1L1      | ENST00000382483     | p.T24N   | c.71C>A    | Verified   | CGC | ACC | CCC | 2 | C | A |
| TCGA-13-0807 | RP1L1      | ENST00000382483     | p.L1576L | c.4728C>A  | Verified   | GAG | CTC | CAG | 3 | C | A |
| TCGA-23-1029 | RP1L1      | ENST00000382483     | p.D2371E | c.7113C>A  | Unverified | TAT | GAC | CTA | 3 | C | A |
| TCGA-23-2078 | RP1L1      | ENST00000382483     | p.C16*   | c.48C>A    | Unverified | GAG | TGC | TTC | 3 | C | A |
| TCGA-61-1900 | RPGRIP1_EN | ENST00000400017     | p.G883G  | c.2649C>A  | Unverified | CCT | GGC | TCG | 3 | C | A |
| TCGA-23-1031 | RPP21      | ENST00000442966     | p.L109L  | c.327C>A   | Verified   | TTA | CTC | TGG | 3 | C | A |
| TCGA-04-1655 | RPS10      | ENST00000326199     | p.N42K   | c.126C>A   | Unverified | CCC | AAC | CTT | 3 | C | A |
| TCGA-23-1032 | RPS9       | ENST00000391752     | p.R172S  | c.514C>A   | Unverified | GGC | CGC | GTG | 1 | C | A |
| TCGA-04-1347 | RPSAP12    | ENST00000361461     | p.P263H  | c.788C>A   | Verified   | TTC | CCT | ACT | 2 | C | A |
| TCGA-29-1691 | RPTN       | ENST00000316073     | p.A219D  | c.656C>A   | Unverified | CAG | GCT | AAA | 2 | C | A |
| TCGA-13-1505 | RQCD1      | ENST00000273064     | p.N88K   | c.264C>A   | Verified   | TCT | AAC | AGA | 3 | C | A |
| TCGA-09-2051 | RRP15      | ENST00000366932     | p.L140M  | c.418C>A   | Unverified | AGG | CTG | GAG | 1 | C | A |
| TCGA-61-2095 | RRP8       | ENST00000254605     | p.I21I   | c.63C>A    | Unverified | GTA | ATC | TCA | 3 | C | A |
| TCGA-23-1118 | RTN1       | ENST00000267484     | p.T296N  | c.887C>A   | Verified   | ACT | ACC | CAA | 2 | C | A |
| TCGA-23-1122 | RTN4R      | ENST00000043402     | p.A215D  | c.644C>A   | Unverified | GTG | GCC | CAT | 2 | C | A |
| TCGA-13-0920 | RTP3       | ENST00000296142     | p.P177Q  | c.530C>A   | Verified   | ACC | CCA | AGA | 2 | C | A |
| TCGA-13-1512 | RUNX2      | ENST00000465038     | p.S323S  | c.969C>A   | Verified   | tct | tcc | aca | 3 | C | A |
| TCGA-23-1021 | RWDD1      | ENST00000466444     | p.P230T  | c.688C>A   | Verified   | GAT | CCA | GAC | 1 | C | A |
| TCGA-23-1021 | RWDD1      | ENST00000466444     | p.P230Q  | c.689C>A   | Verified   | GAT | CCA | GAC | 2 | C | A |
| TCGA-29-1775 | RXRG       | ENST00000359842     | p.Q407K  | c.1219C>A  | Unverified | aag | cag | aag | 1 | C | A |

|              |            |                 |          |           |            |     |     |     |   |   |   |
|--------------|------------|-----------------|----------|-----------|------------|-----|-----|-----|---|---|---|
| TCGA-29-1784 | RYR1       | ENST00000359596 | p.P263T  | c.787C>A  | Unverified | GAG | CCA | CTG | 1 | C | A |
| TCGA-13-0893 | RYR2       | ENST00000366574 | p.H3082N | c.9244C>A | Verified   | ACT | CAC | ACC | 1 | C | A |
| TCGA-13-0760 | RYR3       | ENST00000389232 | p.P2885H | c.8654C>A | Verified   | AAG | CCC | CTT | 2 | C | A |
| TCGA-13-0883 | S100A6     | ENST00000368720 | p.S20S   | c.60C>A   | Verified   | TAC | TCC | GGC | 3 | C | A |
| TCGA-25-1313 | S1PR1      | ENST00000305352 | p.S44R   | c.132C>A  | Verified   | AAC | AGC | ATT | 3 | C | A |
| TCGA-25-2042 | SAG        | ENST00000409110 | p.P206T  | c.616C>A  | Verified   | AAG | CCC | CTG | 1 | C | A |
| TCGA-10-0930 | SALL1      | ENST00000251020 | p.P577H  | c.1730C>A | Verified   | GCC | CCC | ATC | 2 | C | A |
| TCGA-10-0930 | SALL1      | ENST00000251020 | p.P577H  | c.1730C>A | Verified   | GCC | CCC | ATC | 2 | C | A |
| TCGA-29-1701 | SALL4      | ENST00000217086 | p.P212Q  | c.635C>A  | Unverified | ATC | CCG | TGG | 2 | C | A |
| TCGA-09-2044 | SAP30      | ENST00000296504 | p.I100I  | c.300C>A  | Verified   | aag | atc | gag | 3 | C | A |
| TCGA-29-1698 | SCAF1      | ENST00000360565 | p.P233P  | c.699C>A  | Unverified | CAC | CCC | ACC | 3 | C | A |
| TCGA-20-1683 | SCN3A      | ENST00000283254 | p.Q1473K | c.4417C>A | Unverified | AAC | CAG | CAG | 1 | C | A |
| TCGA-20-1683 | SCN3A_ENS  | ENST00000409101 | p.Q1424K | c.4270C>A | Unverified | AAC | CAG | CAG | 1 | C | A |
| TCGA-23-1122 | SCN8A      | ENST00000354534 | p.P1739T | c.5215C>A | Verified   | AAC | CCC | TCA | 1 | C | A |
| TCGA-13-1507 | SCNM1      | ENST00000368905 | p.P184T  | c.550C>A  | Verified   | AGC | CCC | ACA | 1 | C | A |
| TCGA-25-2393 | SCNN1B     | ENST00000343070 | p.T486T  | c.1458C>A | Verified   | ATC | ACC | CTG | 3 | C | A |
| TCGA-09-2056 | SCRT2      | ENST00000246104 | p.F240L  | c.720C>A  | Unverified | CCG | TTC | GGC | 3 | C | A |
| TCGA-29-1776 | SDK1       | ENST00000404826 | p.T2043K | c.6128C>A | Unverified | AGC | ACA | GGA | 2 | C | A |
| TCGA-29-1764 | SEC14L5    | ENST00000251170 | p.Q321K  | c.961C>A  | Unverified | TAC | CAG | GAC | 1 | C | A |
| TCGA-29-1768 | SEC16B     | ENST00000308284 | p.I673I  | c.2019C>A | Unverified | CTC | ATC | AAG | 3 | C | A |
| TCGA-23-1809 | SEC31A_ENS | ENST00000395310 | p.P869T  | c.2605C>A | Unverified | GTA | CCA | CCT | 1 | C | A |
| TCGA-23-1809 | SEC31A_ENS | ENST00000432794 | p.P869T  | c.2605C>A | Unverified | GTA | CCA | CCT | 1 | C | A |
| TCGA-10-0930 | SEPX1      | ENST00000361871 | p.S98R   | c.294C>A  | Verified   | TTC | AGC | AGC | 3 | C | A |
| TCGA-10-0930 | SEPX1      | ENST00000361871 | p.S98R   | c.294C>A  | Verified   | TTC | AGC | AGC | 3 | C | A |
| TCGA-13-0792 | SERPINA4   | ENST00000557004 | p.H147Q  | c.441C>A  | Verified   | AGC | CAC | AAC | 3 | C | A |
| TCGA-61-1998 | SERPINA4   | ENST00000557004 | p.I101I  | c.303C>A  | Verified   | CAG | ATC | CTT | 3 | C | A |
| TCGA-29-1762 | SERPINE3_E | ENST00000521255 | p.P141T  | c.421C>A  | Unverified | GAA | CCA | GCC | 1 | C | A |
| TCGA-29-1764 | SERTAD4    | ENST00000367012 | p.S112Y  | c.335C>A  | Unverified | ATG | TCC | TTA | 2 | C | A |
| TCGA-61-1900 | SETBP1     | ENST00000282030 | p.P37T   | c.109C>A  | Unverified | GAA | CCT | TTG | 1 | C | A |
| TCGA-61-1900 | SETBP1_ENS | ENST00000426838 | p.P37T   | c.109C>A  | Unverified | GAA | CCT | TTG | 1 | C | A |
| TCGA-24-1470 | SETX       | ENST00000224140 | p.R128S  | c.382C>A  | Verified   | GAA | CGT | GTT | 1 | C | A |
| TCGA-24-2280 | SEZ6       | ENST00000317338 | p.P740T  | c.2218C>A | Unverified | TAC | CCT | GGC | 1 | C | A |
| TCGA-13-1497 | SEZ6L      | ENST00000248933 | p.Q548K  | c.1642C>A | Verified   | GAC | CAG | GCC | 1 | C | A |
| TCGA-13-1507 | SHC4       | ENST00000332408 | p.P497T  | c.1489C>A | Verified   | GCA | CCA | GAA | 1 | C | A |

|              |            |                 |          |           |            |     |     |     |   |   |   |
|--------------|------------|-----------------|----------|-----------|------------|-----|-----|-----|---|---|---|
| TCGA-24-1104 | SHF        | ENST00000290894 | p.P270Q  | c.809C>A  | Verified   | GGA | CCG | GAG | 2 | C | A |
| TCGA-04-1338 | SHQ1       | ENST00000325599 | p.R269S  | c.805C>A  | Verified   | TGT | CGT | CAA | 1 | C | A |
| TCGA-13-0904 | SHQ1       | ENST00000325599 | p.H198N  | c.592C>A  | Verified   | GAT | CAT | TAT | 1 | C | A |
| TCGA-09-2051 | SI         | ENST00000264382 | p.P1202T | c.3604C>A | Unverified | ACT | CCA | GAA | 1 | C | A |
| TCGA-04-1342 | SIDT2      | ENST00000324225 | p.Q86K   | c.256C>A  | Unverified | CGC | CAG | AAG | 1 | C | A |
| TCGA-30-1718 | SIGLEC12   | ENST00000291707 | p.A195A  | c.585C>A  | Unverified | GGG | GCC | GAT | 3 | C | A |
| TCGA-23-1029 | SIGLEC16   | ENST00000456956 | p.P370Q  | c.1109C>A | Unverified | CCC | CCA | GCC | 2 | C | A |
| TCGA-23-1022 | SIGLEC8    | ENST00000321424 | p.L375M  | c.1123C>A | Verified   | TTC | CTG | TCC | 1 | C | A |
| TCGA-04-1338 | SIRPD      | ENST00000381623 | p.T102T  | c.306C>A  | Verified   | TCC | ACC | CGC | 3 | C | A |
| TCGA-29-1785 | SIRT7      | ENST00000328666 | p.A258A  | c.774C>A  | Unverified | GCT | GCC | AGC | 3 | C | A |
| TCGA-29-1785 | SIRT7      | ENST00000328666 | p.A258A  | c.774C>A  | Unverified | GCT | GCC | AGC | 3 | C | A |
| TCGA-23-1117 | SLAMF9     | ENST00000368093 | p.S157Y  | c.470C>A  | Verified   | TGC | TCT | GTG | 2 | C | A |
| TCGA-23-1117 | SLAMF9     | ENST00000368093 | p.S157Y  | c.470C>A  | Verified   | TGC | TCT | GTG | 2 | C | A |
| TCGA-24-1417 | SLC11A1    | ENST00000233202 | p.G498G  | c.1494C>A | Verified   | TTC | GGC | CTT | 3 | C | A |
| TCGA-23-1021 | SLC12A8_EN | ENST00000393469 | p.A135A  | c.405C>A  | Verified   | GGT | GCC | ATG | 3 | C | A |
| TCGA-23-1032 | SLC16A14   | ENST00000295190 | p.I369I  | c.1107C>A | Verified   | GTG | ATC | CTG | 3 | C | A |
| TCGA-24-2280 | SLC17A1    | ENST00000244527 | p.S332R  | c.996C>A  | Verified   | CTC | AGC | GTA | 3 | C | A |
| TCGA-24-1845 | SLC17A2    | ENST00000360488 | p.T133T  | c.399C>A  | Unverified | CTC | ACC | CTC | 3 | C | A |
| TCGA-13-0885 | SLC17A8    | ENST00000323346 | p.Q579K  | c.1735C>A | Verified   | TAC | CAG | AAT | 1 | C | A |
| TCGA-13-0904 | SLC22A15_E | ENST00000369503 | p.S108Y  | c.323C>A  | Verified   | AGA | TCC | TAC | 2 | C | A |
| TCGA-23-1117 | SLC24A2    | ENST00000341998 | p.P488T  | c.1462C>A | Verified   | TTA | CCT | GAC | 1 | C | A |
| TCGA-23-1117 | SLC24A2    | ENST00000341998 | p.P488T  | c.1462C>A | Verified   | TTA | CCT | GAC | 1 | C | A |
| TCGA-09-2050 | SLC25A23   | ENST00000301454 | p.F260L  | c.780C>A  | Verified   | AAG | TTC | ATG | 3 | C | A |
| TCGA-23-1117 | SLC25A32   | ENST00000297578 | p.F101L  | c.303C>A  | Verified   | TTT | TTC | TTT | 3 | C | A |
| TCGA-23-1117 | SLC25A32   | ENST00000297578 | p.F101L  | c.303C>A  | Verified   | TTT | TTC | TTT | 3 | C | A |
| TCGA-29-1701 | SLC25A41   | ENST00000321510 | p.T219K  | c.656C>A  | Unverified | CGG | ACG | GGC | 2 | C | A |
| TCGA-24-1417 | SLC26A3    | ENST00000340010 | p.P532Q  | c.1595C>A | Unverified | GAG | CCA | GAA | 2 | C | A |
| TCGA-61-1910 | SLC28A1    | ENST00000286749 | p.A312D  | c.935C>A  | Unverified | GTG | GCT | GGA | 2 | C | A |
| TCGA-24-2024 | SLC29A2    | ENST00000357440 | p.S443Y  | c.1328C>A | Verified   | CTT | TCC | TGT | 2 | C | A |
| TCGA-13-0900 | SLC2A11    | ENST00000398356 | p.S104Y  | c.311C>A  | Verified   | AAG | TCC | CTC | 2 | C | A |
| TCGA-04-1347 | SLC2A13    | ENST00000380863 | p.Y436*  | c.1308C>A | Verified   | TGC | TAC | AAG | 3 | C | A |
| TCGA-25-2400 | SLC34A3    | ENST00000361134 | p.D52E   | c.156C>A  | Unverified | AAG | GAC | ACA | 3 | C | A |
| TCGA-25-1326 | SLC35F3    | ENST00000366618 | p.L282I  | c.844C>A  | Verified   | ATC | CTC | GCC | 1 | C | A |
| TCGA-13-0903 | SLC35F4    | ENST00000339762 | p.S51*   | c.152C>A  | Verified   | AAA | TCA | CTG | 2 | C | A |

|              |            |                 |          |           |            |     |     |     |   |   |   |
|--------------|------------|-----------------|----------|-----------|------------|-----|-----|-----|---|---|---|
| TCGA-61-1913 | SLC37A4    | ENST00000330775 | p.S293S  | c.879C>A  | Unverified | CTG | TCC | AAC | 3 | C | A |
| TCGA-61-1740 | SLC38A4    | ENST00000266579 | p.A462E  | c.1385C>A | Unverified | ATT | GCA | CTT | 2 | C | A |
| TCGA-29-1785 | SLC40A1    | ENST00000261024 | p.P424T  | c.1270C>A | Unverified | ATA | CCT | GAA | 1 | C | A |
| TCGA-29-1785 | SLC40A1    | ENST00000261024 | p.P424T  | c.1270C>A | Unverified | ATA | CCT | GAA | 1 | C | A |
| TCGA-24-0979 | SLC47A2    | ENST00000325411 | p.G289G  | c.867C>A  | Unverified | TGG | GGC | CCC | 3 | C | A |
| TCGA-24-1845 | SLC4A1     | ENST00000262418 | p.L738L  | c.2214C>A | Unverified | GCC | CTC | ACT | 3 | C | A |
| TCGA-29-1781 | SLC4A10    | ENST00000415876 | p.R237S  | c.709C>A  | Unverified | GTT | CGT | TCC | 1 | C | A |
| TCGA-29-1781 | SLC4A10_EN | ENST00000446997 | p.R237S  | c.709C>A  | Unverified | GTT | CGT | TCC | 1 | C | A |
| TCGA-23-1124 | SLC4A5     | ENST00000394019 | p.P30T   | c.88C>A   | Verified   | CCT | CCT | ATC | 1 | C | A |
| TCGA-24-1474 | SLC4A7     | ENST00000295736 | p.A357E  | c.1070C>A | Verified   | GAA | GCA | GCG | 2 | C | A |
| TCGA-13-0893 | SLC5A9     | ENST00000236495 | p.T282T  | c.846C>A  | Verified   | AAC | ACC | ACC | 3 | C | A |
| TCGA-13-1488 | SLC6A12    | ENST00000397296 | p.A73D   | c.218C>A  | Verified   | GGA | GCC | TTC | 2 | C | A |
| TCGA-29-1696 | SLC7A14    | ENST00000231706 | p.L599I  | c.1795C>A | Unverified | ATC | CTT | CTG | 1 | C | A |
| TCGA-29-1696 | SLC7A14    | ENST00000231706 | p.L599I  | c.1795C>A | Unverified | ATC | CTT | CTG | 1 | C | A |
| TCGA-13-0887 | SLC7A14    | ENST00000231706 | p.S24S   | c.72C>A   | Verified   | CAC | TCC | AGG | 3 | C | A |
| TCGA-61-2009 | SLCO2B1    | ENST00000289575 | p.C553*  | c.1659C>A | Verified   | TCC | TGC | GAC | 3 | C | A |
| TCGA-13-0920 | SLITRK3    | ENST00000241274 | p.T94T   | c.282C>A  | Verified   | TAT | ACC | AAC | 3 | C | A |
| TCGA-24-1474 | SLITRK4    | ENST00000381779 | p.A833D  | c.2498C>A | Unverified | aca | gct | ttg | 2 | C | A |
| TCGA-13-0760 | SLITRK6    | ENST00000400286 | p.L95I   | c.283C>A  | Verified   | CAC | CTT | GGA | 1 | C | A |
| TCGA-04-1342 | SMAD7      | ENST00000262158 | p.C160*  | c.480C>A  | Unverified | CTG | TGC | AAA | 3 | C | A |
| TCGA-13-0761 | SMARCA1    | NM_003069.2     | p.I195I  | c.585C>A  | Verified   | ttg | atc | tct | 3 | C | A |
| TCGA-13-0761 | SMARCA1    | NM_003069.2     | p.I195I  | c.585C>A  | Verified   | ttg | atc | tct | 3 | C | A |
| TCGA-23-1123 | SMARCA4    | ENST00000429416 | p.T814K  | c.2441C>A | Verified   | tca | acg | ctg | 2 | C | A |
| TCGA-23-1123 | SMARCA4    | ENST00000429416 | p.T814K  | c.2441C>A | Verified   | tca | acg | ctg | 2 | C | A |
| TCGA-13-1501 | SMARCA4    | ENST00000429416 | p.L476L  | c.1428C>A | Verified   | tac | ctc | aat | 3 | C | A |
| TCGA-13-1501 | SMARCA4    | ENST00000429416 | p.L476L  | c.1428C>A | Verified   | tac | ctc | aat | 3 | C | A |
| TCGA-29-1711 | SMC1A      | ENST00000322213 | p.A1143A | c.3429C>A | Unverified | ttt | gcc | atc | 3 | C | A |
| TCGA-29-1711 | SMC1A      | ENST00000322213 | p.A1143A | c.3429C>A | Unverified | ttt | gcc | atc | 3 | C | A |
| TCGA-04-1649 | SMOC2      | ENST00000354536 | p.T209N  | c.626C>A  | Unverified | TGG | ACT | GAA | 2 | C | A |
| TCGA-23-1120 | SMYD4      | ENST00000305513 | p.P797H  | c.2390C>A | Unverified | CCA | CCC | ACC | 2 | C | A |
| TCGA-29-1762 | SNRK       | ENST00000454177 | p.A603D  | c.1808C>A | Unverified | AAT | GCT | GGT | 2 | C | A |
| TCGA-29-1762 | SNRK_ENST  | ENST00000454177 | p.A603D  | c.1808C>A | Unverified | AAT | GCT | GGT | 2 | C | A |
| TCGA-13-0904 | SNRNP200   | ENST00000323853 | p.T790T  | c.2370C>A | Verified   | ATG | ACC | AGG | 3 | C | A |
| TCGA-23-1123 | SNX8       | ENST00000222990 | p.R236R  | c.708C>A  | Verified   | CTT | CGC | GAC | 3 | C | A |

|              |            |                 |          |            |            |     |     |     |   |   |   |
|--------------|------------|-----------------|----------|------------|------------|-----|-----|-----|---|---|---|
| TCGA-23-1123 | SNX8       | ENST00000222990 | p.R236R  | c.708C>A   | Verified   | CTT | CGC | GAC | 3 | C | A |
| TCGA-09-1674 | SORL1      | ENST00000260197 | p.Q479K  | c.1435C>A  | Unverified | GCT | CAG | CGC | 1 | C | A |
| TCGA-13-0893 | SOS1       | ENST00000426016 | p.P1184H | c.3551C>A  | Verified   | cct | cct | agg | 2 | C | A |
| TCGA-13-1481 | SPAG1      | ENST00000388798 | p.S581*  | c.1742C>A  | Verified   | CTG | TCA | CCT | 2 | C | A |
| TCGA-29-1775 | SPAG17     | ENST00000336338 | p.T2013N | c.6038C>A  | Unverified | CCA | ACC | CAG | 2 | C | A |
| TCGA-09-1665 | SPAG8      | ENST00000340291 | p.S299R  | c.897C>A   | Verified   | CCA | AGC | ATG | 3 | C | A |
| TCGA-23-2077 | SPHKAP     | XM_051221.5     | p.P1617T | c.4849C>A  | Unverified | ccg | cct | acg | 1 | C | A |
| TCGA-24-1845 | SPIRE1     | ENST00000309836 | p.L420I  | c.1258C>A  | Unverified | AAG | CTC | TGC | 1 | C | A |
| TCGA-24-1845 | SPIRE1_ENS | ENST00000409402 | p.L593I  | c.1777C>A  | Unverified | AAG | CTC | TGC | 1 | C | A |
| TCGA-61-2102 | SPN        | ENST00000360121 | p.P389H  | c.1166C>A  | Unverified | GCT | CCT | GAT | 2 | C | A |
| TCGA-24-0979 | SPOCD1     | ENST00000360482 | p.I59I   | c.177C>A   | Unverified | AAG | ATC | CCC | 3 | C | A |
| TCGA-23-1124 | SPP1       | ENST00000395080 | p.Q229K  | c.685C>A   | Verified   | agt | cag | ctg | 1 | C | A |
| TCGA-04-1649 | SPRY1      | ENST00000339241 | p.T193N  | c.578C>A   | Unverified | tgc | act | gct | 2 | C | A |
| TCGA-25-2042 | SPRYD4     | ENST00000338146 | p.L162M  | c.484C>A   | Unverified | AAG | CTG | AGC | 1 | C | A |
| TCGA-09-2051 | SPTBN5     | ENST00000320955 | p.C3366* | c.10098C>A | Unverified | GAG | TGC | CGC | 3 | C | A |
| TCGA-04-1655 | SRCAP      | ENST00000262518 | p.T3133N | c.9398C>A  | Unverified | GAG | ACT | GAG | 2 | C | A |
| TCGA-29-1702 | SRP72      | ENST00000342756 | p.L521I  | c.1561C>A  | Unverified | GCT | CTT | GAA | 1 | C | A |
| TCGA-13-1488 | SRP9P1     | ENST00000318333 | p.F65L   | c.195C>A   | Verified   | AAA | TTC | CAC | 3 | C | A |
| TCGA-09-2051 | SRSF1      | ENST00000258962 | p.H140Q  | c.420C>A   | Unverified | GAT | CAC | ATG | 3 | C | A |
| TCGA-29-1762 | SSFA2      | ENST00000320370 | p.H505N  | c.1513C>A  | Unverified | CAG | CAT | TCC | 1 | C | A |
| TCGA-25-1326 | ST8SIA5    | ENST00000315087 | p.L130I  | c.388C>A   | Verified   | AAG | CTC | AAG | 1 | C | A |
| TCGA-24-1474 | STAB2      | ENST00000388887 | p.P1929T | c.5785C>A  | Verified   | CTG | CCC | TTC | 1 | C | A |
| TCGA-24-1563 | STAG2      | ENST00000371160 | p.R305R  | c.913C>A   | Verified   | att | cga | gct | 1 | C | A |
| TCGA-61-1998 | STAG3      | ENST00000426455 | p.R232S  | c.694C>A   | Verified   | ttc | cgt | cac | 1 | C | A |
| TCGA-13-0890 | STAG3      | ENST00000426455 | p.A441A  | c.1323C>A  | Verified   | ctg | gcc | tct | 3 | C | A |
| TCGA-24-1474 | STAMBPL1   | ENST00000371924 | p.A318E  | c.953C>A   | Verified   | TCT | GCG | GGA | 2 | C | A |
| TCGA-24-1422 | STARD4     | ENST00000296632 | p.S81R   | c.243C>A   | Verified   | gac | agc | ttg | 3 | C | A |
| TCGA-23-1123 | STARD5     | ENST00000302824 | p.T178T  | c.534C>A   | Verified   | CAT | ACC | GAC | 3 | C | A |
| TCGA-23-1123 | STARD5     | ENST00000302824 | p.T178T  | c.534C>A   | Verified   | CAT | ACC | GAC | 3 | C | A |
| TCGA-13-0904 | STARD8     | ENST00000252336 | p.N456K  | c.1368C>A  | Verified   | GGG | AAC | TCC | 3 | C | A |
| TCGA-13-0904 | STARD8_ENS | ENST00000252336 | p.N456K  | c.1368C>A  | Verified   | GGG | AAC | TCC | 3 | C | A |
| TCGA-24-1849 | STEAP1     | ENST00000297205 | p.P41H   | c.122C>A   | Unverified | AGA | CCT | GTG | 2 | C | A |
| TCGA-13-0886 | STK10      | ENST00000176763 | p.G513G  | c.1539C>A  | Verified   | ATG | GGC | TCT | 3 | C | A |
| TCGA-13-0913 | STK38L     | ENST00000389032 | p.L359I  | c.1075C>A  | Verified   | ATT | CTC | AGA | 1 | C | A |

|              |            |                 |          |            |            |     |     |     |   |   |   |
|--------------|------------|-----------------|----------|------------|------------|-----|-----|-----|---|---|---|
| TCGA-04-1649 | STRC_ENSTC | ENST00000450892 | p.T1178N | c.3533C>A  | Unverified | CCC | ACC | AAC | 2 | C | A |
| TCGA-25-1318 | STX3       | ENST00000337979 | p.P69T   | c.205C>A   | Verified   | ATT | CCA | GAG | 1 | C | A |
| TCGA-25-1318 | STX3       | ENST00000337979 | p.P69T   | c.205C>A   | Verified   | ATT | CCA | GAG | 1 | C | A |
| TCGA-24-2262 | SULF1      | ENST00000260128 | p.S676R  | c.2028C>A  | Unverified | TGT | AGC | TGC | 3 | C | A |
| TCGA-24-2288 | SULT1C2    | ENST00000326853 | p.L43L   | c.129C>A   | Unverified | CTC | CTC | ATC | 3 | C | A |
| TCGA-29-1762 | SULT1C4    | ENST00000272452 | p.L112M  | c.334C>A   | Unverified | ATC | CTG | AAA | 1 | C | A |
| TCGA-23-2078 | SURF1      | ENST00000371974 | p.Y274*  | c.822C>A   | Unverified | cag | tac | atc | 3 | C | A |
| TCGA-24-2035 | SUSD3      | ENST00000375472 | p.T42N   | c.125C>A   | Verified   | gca | acc | ttc | 2 | C | A |
| TCGA-23-1118 | SUV420H1   | NM_017635.3     | p.P670T  | c.2008C>A  | Verified   | gct | cct | tca | 1 | C | A |
| TCGA-23-1124 | SWAP70     | ENST00000318950 | p.S197Y  | c.590C>A   | Verified   | GTG | TCT | ATG | 2 | C | A |
| TCGA-24-1104 | SYCE1      | ENST00000368517 | p.T188N  | c.563C>A   | Verified   | TCC | ACC | CTT | 2 | C | A |
| TCGA-61-1899 | SYCP2L     | ENST00000283141 | p.L249I  | c.745C>A   | Unverified | GAA | CTT | GTC | 1 | C | A |
| TCGA-29-2427 | SYNE1      | ENST00000265368 | p.T6205K | c.18614C>A | Verified   | CTA | ACA | GCC | 2 | C | A |
| TCGA-61-1737 | SYNE1      | ENST00000265368 | p.A4125D | c.12374C>A | Unverified | CAG | GCC | CAG | 2 | C | A |
| TCGA-04-1338 | SYNE1      | ENST00000265368 | p.G5491G | c.16473C>A | Verified   | AAT | GGC | CAA | 3 | C | A |
| TCGA-29-2427 | SYNE1_ENST | ENST00000265368 | p.T6205K | c.18614C>A | Verified   | CTA | ACA | GCC | 2 | C | A |
| TCGA-61-1737 | SYNE1_ENST | ENST00000265368 | p.A4125D | c.12374C>A | Unverified | CAG | GCC | CAG | 2 | C | A |
| TCGA-04-1338 | SYNE1_ENST | ENST00000265368 | p.G5491G | c.16473C>A | Verified   | AAT | GGC | CAA | 3 | C | A |
| TCGA-61-1737 | SYNE1_ENST | ENST00000423061 | p.A4054D | c.12161C>A | Unverified | CAG | GCC | CAG | 2 | C | A |
| TCGA-29-1691 | SYNE2      | ENST00000358025 | p.P5531H | c.16592C>A | Unverified | AAT | CCT | GAC | 2 | C | A |
| TCGA-61-1915 | SYT11      | ENST00000368324 | p.T68N   | c.203C>A   | Unverified | GAG | ACC | CTC | 2 | C | A |
| TCGA-04-1347 | SYTL1      | ENST00000318074 | p.N349K  | c.1047C>A  | Verified   | CGC | AAC | ATC | 3 | C | A |
| TCGA-25-1326 | TAAR6      | ENST00000275198 | p.Q62K   | c.184C>A   | Verified   | AAG | CAG | CTG | 1 | C | A |
| TCGA-24-1422 | TAC3       | ENST00000300108 | p.P41T   | c.121C>A   | Verified   | GAT | CCA | GAT | 1 | C | A |
| TCGA-23-1022 | TAF6       | ENST00000344095 | p.L201M  | c.601C>A   | Verified   | TTG | CTG | GAG | 1 | C | A |
| TCGA-24-1843 | TAS1R2     | ENST00000375371 | p.L34L   | c.102C>A   | Unverified | TAC | CTC | CTG | 3 | C | A |
| TCGA-29-1691 | TAS2R1     | ENST00000382492 | p.L247I  | c.739C>A   | Unverified | TTT | CTC | TCT | 1 | C | A |
| TCGA-24-1463 | TAS2R9     | ENST00000240691 | p.T209N  | c.626C>A   | Unverified | CAC | ACC | AAG | 2 | C | A |
| TCGA-24-1563 | TBC1D2     | ENST00000375066 | p.A720D  | c.2159C>A  | Verified   | GCG | GCC | ATT | 2 | C | A |
| TCGA-24-2289 | TBC1D5     | ENST00000253692 | p.D794E  | c.2382C>A  | Unverified | CTG | GAC | ATC | 3 | C | A |
| TCGA-61-1914 | TBC1D8     | ENST00000409318 | p.L531I  | c.1591C>A  | Unverified | TGG | CTT | CTC | 1 | C | A |
| TCGA-61-1914 | TBC1D8_ENI | ENST00000376840 | p.L516I  | c.1546C>A  | Unverified | TGG | CTT | CTC | 1 | C | A |
| TCGA-29-1777 | TBC1D8B    | ENST00000357242 | p.S920*  | c.2759C>A  | Unverified | gct | tca | aaa | 2 | C | A |
| TCGA-29-1775 | TBPL2      | ENST00000247219 | p.P160T  | c.478C>A   | Unverified | CAC | CCT | GGT | 1 | C | A |



|              |            |                 |          |           |            |     |     |     |   |   |   |
|--------------|------------|-----------------|----------|-----------|------------|-----|-----|-----|---|---|---|
| TCGA-20-1685 | TBPL2      | ENST00000247219 | p.H119Q  | c.357C>A  | Unverified | AAA | CAC | GAA | 3 | C | A |
| TCGA-30-1714 | TBRG4      | ENST00000258770 | p.L527M  | c.1579C>A | Unverified | GTG | CTG | CTG | 1 | C | A |
| TCGA-13-0883 | TBX22      | ENST00000373296 | p.L201I  | c.601C>A  | Verified   | aaa | ctc | acc | 1 | C | A |
| TCGA-24-1431 | TCEB3      | ENST00000374536 | p.L139I  | c.415C>A  | Verified   | GAG | CTC | GAG | 1 | C | A |
| TCGA-30-1855 | TCF12      | ENST00000438423 | p.L471L  | c.1413C>A | Unverified | AGC | CTC | AAT | 3 | C | A |
| TCGA-30-1855 | TCF12_ENST | ENST00000343827 | p.L277L  | c.831C>A  | Unverified | AGC | CTC | AAT | 3 | C | A |
| TCGA-30-1855 | TCF12_ENST | ENST00000438423 | p.L471L  | c.1413C>A | Unverified | AGC | CTC | AAT | 3 | C | A |
| TCGA-30-1855 | TCF12_ENST | ENST00000452095 | p.L467L  | c.1401C>A | Unverified | AGC | CTC | AAT | 3 | C | A |
| TCGA-61-2109 | TCF20      | ENST00000359486 | p.P372T  | c.1114C>A | Unverified | TCT | CCA | GCT | 1 | C | A |
| TCGA-61-1910 | TCL1A      | ENST00000554012 | p.T65T   | c.195C>A  | Unverified | CCC | ACC | CAG | 3 | C | A |
| TCGA-29-1776 | TCP1       | ENST00000321394 | p.H113N  | c.337C>A  | Unverified | ATT | CAT | CCC | 1 | C | A |
| TCGA-20-1687 | TDGF1      | ENST00000296145 | p.C97*   | c.291C>A  | Unverified | GCC | TGC | CCT | 3 | C | A |
| TCGA-13-0920 | TDP2       | ENST00000378198 | p.S69R   | c.207C>A  | Verified   | gag | agc | gcc | 3 | C | A |
| TCGA-29-1711 | TEAD2      | ENST00000311227 | p.I115I  | c.345C>A  | Unverified | GAA | ATC | CAG | 3 | C | A |
| TCGA-29-1711 | TEAD2      | ENST00000311227 | p.I115I  | c.345C>A  | Unverified | GAA | ATC | CAG | 3 | C | A |
| TCGA-29-1766 | TECTA      | ENST00000392793 | p.I233I  | c.699C>A  | Unverified | AAT | ATC | CAG | 3 | C | A |
| TCGA-09-2049 | TEKT4      | ENST00000295201 | p.I212I  | c.636C>A  | Verified   | AAC | ATC | GAC | 3 | C | A |
| TCGA-23-1031 | TEP1       | ENST00000262715 | p.L1222M | c.3664C>A | Unverified | TAT | CTG | CGT | 1 | C | A |
| TCGA-29-1768 | TET2       | ENST00000380013 | p.P732Q  | c.2195C>A | Unverified | CAA | CCA | TCC | 2 | C | A |
| TCGA-29-1768 | TET2_ENST0 | ENST00000305737 | p.P732Q  | c.2195C>A | Unverified | CAA | CCA | TCC | 2 | C | A |
| TCGA-61-1725 | TFR2       | ENST00000223051 | p.Y594*  | c.1782C>A | Unverified | GCC | TAC | CCA | 3 | C | A |
| TCGA-24-1604 | TG         | ENST00000220616 | p.Q1095K | c.3283C>A | Verified   | TCC | CAA | GAA | 1 | C | A |
| TCGA-04-1338 | TGFBR3     | ENST00000212355 | p.H94N   | c.280C>A  | Verified   | GTC | CAC | ATC | 1 | C | A |
| TCGA-25-1313 | THAP8      | ENST00000392182 | p.Q181K  | c.541C>A  | Unverified | CTG | CAA | CGC | 1 | C | A |
| TCGA-13-0890 | THNSL2     | ENST00000324166 | p.R413R  | c.1237C>A | Verified   | CCC | CGG | TGC | 1 | C | A |
| TCGA-13-0760 | THOP1      | ENST00000307741 | p.L182M  | c.544C>A  | Verified   | AAC | CTG | AAC | 1 | C | A |
| TCGA-23-1123 | THSD7B     | ENST00000272643 | p.S659Y  | c.1976C>A | Verified   | CAT | TCC | TGT | 2 | C | A |
| TCGA-23-1123 | THSD7B     | ENST00000272643 | p.S659Y  | c.1976C>A | Verified   | CAT | TCC | TGT | 2 | C | A |
| TCGA-24-1604 | THSD7B     | ENST00000272643 | p.S1485Y | c.4454C>A | Verified   | TTC | TCC | TAC | 2 | C | A |
| TCGA-23-1031 | TIAM2      | ENST00000318981 | p.S402S  | c.1206C>A | Verified   | AGG | TCC | AAG | 3 | C | A |
| TCGA-24-1604 | TIE1       | ENST00000372476 | p.V1041V | c.3123C>A | Verified   | GGA | GTC | CTT | 3 | C | A |
| TCGA-13-1510 | TIMELESS   | ENST00000553532 | p.R277R  | c.829C>A  | Verified   | TCT | CGA | TTT | 1 | C | A |
| TCGA-23-1124 | TLE6       | ENST00000452088 | p.P331H  | c.992C>A  | Verified   | AAA | CCT | CTG | 2 | C | A |
| TCGA-13-0791 | TLR5       | ENST00000366881 | p.Y108*  | c.324C>A  | Verified   | ATA | TAC | TTC | 3 | C | A |

|              |            |                 |         |           |            |     |     |     |   |   |   |
|--------------|------------|-----------------|---------|-----------|------------|-----|-----|-----|---|---|---|
| TCGA-23-1110 | TLR5       | ENST00000366881 | p.T468T | c.1404C>A | Verified   | CAA | ACC | CCT | 3 | C | A |
| TCGA-24-1103 | TMC2       | ENST00000358864 | p.P560P | c.1680C>A | Verified   | GTC | CCC | CGA | 3 | C | A |
| TCGA-13-0760 | TMED1      | ENST00000214869 | p.V83V  | c.249C>A  | Verified   | TTG | GTC | AGC | 3 | C | A |
| TCGA-09-2050 | TMED3      | ENST00000299705 | p.T108N | c.323C>A  | Verified   | TCC | ACC | TTC | 2 | C | A |
| TCGA-24-2262 | TMEM105    | ENST00000332900 | p.S59S  | c.177C>A  | Verified   | GGG | TCC | CCA | 3 | C | A |
| TCGA-61-1733 | TMEM132B   | ENST00000299308 | p.F412L | c.1236C>A | Unverified | ATC | TTC | GTC | 3 | C | A |
| TCGA-61-1733 | TMEM132B   | ENST00000299308 | p.F412L | c.1236C>A | Unverified | ATC | TTC | GTC | 3 | C | A |
| TCGA-13-1498 | TMEM38B    | ENST00000374692 | p.A43E  | c.128C>A  | Verified   | TTG | GCA | TGG | 2 | C | A |
| TCGA-23-1110 | TMEM53     | ENST00000372237 | p.R134S | c.400C>A  | Verified   | TGC | CGC | CTG | 1 | C | A |
| TCGA-61-1725 | TMEM55A    | ENST00000285419 | p.G212G | c.636C>A  | Unverified | GTT | GGC | ACC | 3 | C | A |
| TCGA-04-1361 | TMEM59L    | ENST00000262817 | p.P214T | c.640C>A  | Verified   | CAC | CCT | GAA | 1 | C | A |
| TCGA-04-1361 | TMEM59L    | ENST00000262817 | p.P214T | c.640C>A  | Verified   | CAC | CCT | GAA | 1 | C | A |
| TCGA-04-1651 | TMEM62     | ENST00000260403 | p.S182* | c.545C>A  | Unverified | TAT | TCG | TTC | 2 | C | A |
| TCGA-04-1651 | TMEM62     | ENST00000260403 | p.S182* | c.545C>A  | Unverified | TAT | TCG | TTC | 2 | C | A |
| TCGA-25-2042 | TMEM70     | ENST00000312184 | p.S40Y  | c.119C>A  | Unverified | GCG | TCC | TCC | 2 | C | A |
| TCGA-13-0893 | TMEM74     | ENST00000297459 | p.T286K | c.857C>A  | Verified   | agc | acg | aat | 2 | C | A |
| TCGA-61-1900 | TMEM9B     | ENST00000534025 | p.H156Q | c.468C>A  | Unverified | GCA | CAC | GAT | 3 | C | A |
| TCGA-29-1783 | TMPRSS11A  | ENST00000334830 | p.Q105K | c.313C>A  | Unverified | AAC | CAA | GTA | 1 | C | A |
| TCGA-24-1422 | TMPRSS15   | ENST00000284885 | p.T42K  | c.125C>A  | Verified   | CTG | ACA | ATC | 2 | C | A |
| TCGA-13-0760 | TMPRSS3    | ENST00000291532 | p.A387E | c.1160C>A | Verified   | TGC | GCG | GGC | 2 | C | A |
| TCGA-29-1763 | TNFRSF8    | ENST00000263932 | p.T294T | c.882C>A  | Unverified | GCC | ACC | AAC | 3 | C | A |
| TCGA-13-1510 | TNIK       | ENST00000436636 | p.P869T | c.2605C>A | Verified   | GCT | CCA | GGC | 1 | C | A |
| TCGA-13-0884 | TNPO3      | ENST00000265388 | p.R160R | c.478C>A  | Verified   | tta | cga | att | 1 | C | A |
| TCGA-24-1844 | TNS3       | ENST00000311160 | p.P483H | c.1448C>A | Unverified | ATG | CCC | CAC | 2 | C | A |
| TCGA-61-2008 | TOPORS     | ENST00000360538 | p.T185K | c.554C>A  | Verified   | CTG | ACA | AGG | 2 | C | A |
| TCGA-61-2012 | TOX2_ENST  | ENST00000348077 | p.A30E  | c.89C>A   | Verified   | CTT | GCA | AGA | 2 | C | A |
| TCGA-04-1347 | TPO        | ENST00000345913 | p.D585E | c.1755C>A | Verified   | cgg | gac | cac | 3 | C | A |
| TCGA-61-1740 | TRAK1_ENST | ENST00000396175 | p.P819T | c.2455C>A | Unverified | GGG | CCC | CCG | 1 | C | A |
| TCGA-29-1777 | TRAPPC8    | ENST00000283351 | p.P474Q | c.1421C>A | Unverified | CAA | CCA | GGA | 2 | C | A |
| TCGA-09-2044 | TREX2      | ENST00000393862 | p.S38S  | c.114C>A  | Unverified | cgc | tcc | tcc | 3 | C | A |
| TCGA-13-0793 | TRIM31     | ENST00000376734 | p.Q5K   | c.13C>A   | Unverified | ggg | cag | ttt | 1 | C | A |
| TCGA-25-2042 | TRIM5      | ENST00000380034 | p.Y138* | c.414C>A  | Unverified | GAG | TAC | CAA | 3 | C | A |
| TCGA-24-2289 | TRIM58     | ENST00000366481 | p.L439I | c.1315C>A | Unverified | CAA | CTC | TTC | 1 | C | A |
| TCGA-24-2289 | TRIM71     | ENST00000383763 | p.S504S | c.1512C>A | Unverified | GCC | TCC | TTC | 3 | C | A |

|              |            |                 |           |            |            |     |     |     |   |   |   |
|--------------|------------|-----------------|-----------|------------|------------|-----|-----|-----|---|---|---|
| TCGA-24-1845 | TRIP10     | ENST00000313285 | p.D467E   | c.1401C>A  | Unverified | cag | gac | acc | 3 | C | A |
| TCGA-24-1845 | TRIP10_ENS | ENST00000313244 | p.D523E   | c.1569C>A  | Unverified | CAG | GAC | ACC | 3 | C | A |
| TCGA-24-0979 | TRO        | ENST00000319167 | p.L394M   | c.1180C>A  | Verified   | tat | ctg | gct | 1 | C | A |
| TCGA-24-2289 | TRPC6      | ENST00000344327 | p.L368I   | c.1102C>A  | Unverified | AAA | CTT | GCC | 1 | C | A |
| TCGA-29-1766 | TRPM3_ENS  | ENST00000377110 | p.L39I    | c.115C>A   | Unverified | CCC | CTA | AAC | 1 | C | A |
| TCGA-25-2398 | TRPV5      | ENST00000265310 | p.R302R   | c.904C>A   | Verified   | AAA | CGA | GAG | 1 | C | A |
| TCGA-13-0886 | TRRAP      | ENST00000355540 | p.L774L   | c.2322C>A  | Unverified | GAT | CTC | TTG | 3 | C | A |
| TCGA-13-0886 | TRRAP_ENS  | ENST00000359863 | p.L774L   | c.2322C>A  | Unverified | GAT | CTC | TTG | 3 | C | A |
| TCGA-61-1900 | TSC1       | ENST00000298552 | p.P670P   | c.2010C>A  | Unverified | tta | ccc | agc | 3 | C | A |
| TCGA-23-1122 | TSPEAR     | ENST00000323084 | p.S631R   | c.1893C>A  | Unverified | CAC | AGC | CTC | 3 | C | A |
| TCGA-23-1021 | TSTD2      | ENST00000341170 | p.L307I   | c.919C>A   | Verified   | ATC | CTT | CTT | 1 | C | A |
| TCGA-29-1764 | TTC39B     | NM_152574.1     | p.A310E   | c.929C>A   | Unverified | ggt | gcg | gaa | 2 | C | A |
| TCGA-29-1764 | TTC39B_ENS | ENST00000512701 | p.A376E   | c.1127C>A  | Unverified | GTT | GCG | GAA | 2 | C | A |
| TCGA-29-1777 | TTC7A      | ENST00000319190 | p.V698V   | c.2094C>A  | Unverified | TCG | GTC | CTG | 3 | C | A |
| TCGA-24-1469 | TTC7B      | ENST00000328459 | p.P209H   | c.626C>A   | Verified   | GCT | CCC | CAC | 2 | C | A |
| TCGA-04-1338 | TTN        | NM_003319       | p.R16184S | c.48550C>A | Verified   | agc | cgc | tta | 1 | C | A |
| TCGA-24-1846 | TTN        | NM_003319       | p.T18292K | c.54875C>A | Unverified | ggt | aca | aag | 2 | C | A |
| TCGA-61-1738 | TTN        | NM_003319       | p.S15027* | c.45080C>A | Unverified | gat | tca | aca | 2 | C | A |
| TCGA-61-1738 | TTN        | NM_003319       | p.S15027* | c.45080C>A | Unverified | gat | tca | aca | 2 | C | A |
| TCGA-29-1775 | TTN        | NM_003319       | p.L10325L | c.30975C>A | Unverified | cac | ctc | gac | 3 | C | A |
| TCGA-13-1408 | TTN_ENST00 | ENST00000342175 | p.P19284T | c.57850C>A | Unverified | GGT | CCT | CCT | 1 | C | A |
| TCGA-24-1846 | TTN_ENST00 | ENST00000342175 | p.T18484K | c.55451C>A | Unverified | GGT | ACA | AAG | 2 | C | A |
| TCGA-61-1738 | TTN_ENST00 | ENST00000342175 | p.S15219* | c.45656C>A | Unverified | GAT | TCA | ACA | 2 | C | A |
| TCGA-61-1738 | TTN_ENST00 | ENST00000342175 | p.S15219* | c.45656C>A | Unverified | GAT | TCA | ACA | 2 | C | A |
| TCGA-29-1775 | TTN_ENST00 | ENST00000342175 | p.L10517L | c.31551C>A | Unverified | CAC | CTC | GAC | 3 | C | A |
| TCGA-30-1718 | TTN_ENST00 | ENST00000342992 | p.L7272I  | c.21814C>A | Unverified | GTT | CTC | AAA | 1 | C | A |
| TCGA-24-1846 | TTN_ENST00 | ENST00000342992 | p.T24789K | c.74366C>A | Unverified | GGT | ACA | AAG | 2 | C | A |
| TCGA-61-1738 | TTN_ENST00 | ENST00000342992 | p.S21524* | c.64571C>A | Unverified | GAT | TCA | ACA | 2 | C | A |
| TCGA-61-1738 | TTN_ENST00 | ENST00000342992 | p.S21524* | c.64571C>A | Unverified | GAT | TCA | ACA | 2 | C | A |
| TCGA-29-1775 | TTN_ENST00 | ENST00000342992 | p.L16822L | c.50466C>A | Unverified | CAC | CTC | GAC | 3 | C | A |
| TCGA-04-1338 | TTN_ENST00 | ENST00000356127 | p.R22679S | c.68035C>A | Verified   | AGC | CGC | TTA | 1 | C | A |
| TCGA-13-1408 | TTN_ENST00 | ENST00000356127 | p.P25587T | c.76759C>A | Unverified | GGT | CCT | CCT | 1 | C | A |
| TCGA-24-1846 | TTN_ENST00 | ENST00000356127 | p.T24787K | c.74360C>A | Unverified | GGT | ACA | AAG | 2 | C | A |
| TCGA-61-1738 | TTN_ENST00 | ENST00000356127 | p.S21522* | c.64565C>A | Unverified | GAT | TCA | ACA | 2 | C | A |

|              |                      |                 |            |            |            |     |     |     |   |   |   |
|--------------|----------------------|-----------------|------------|------------|------------|-----|-----|-----|---|---|---|
| TCGA-61-1738 | TTN_ENST00000356127  | p.S21522*       | c.64565C>A | Unverified | GAT        | TCA | ACA | 2   | C | A |   |
| TCGA-23-1022 | TTN_ENST00000356127  | p.G16021G       | c.48063C>A | Verified   | ATT        | GGC | CTC | 3   | C | A |   |
| TCGA-29-1775 | TTN_ENST00000356127  | p.L16820L       | c.50460C>A | Unverified | CAC        | CTC | GAC | 3   | C | A |   |
| TCGA-24-1846 | TTN_ENST00000359218  | p.T18417K       | c.55250C>A | Unverified | GGT        | ACA | AAG | 2   | C | A |   |
| TCGA-61-1738 | TTN_ENST00000359218  | p.S15152*       | c.45455C>A | Unverified | GAT        | TCA | ACA | 2   | C | A |   |
| TCGA-61-1738 | TTN_ENST00000359218  | p.S15152*       | c.45455C>A | Unverified | GAT        | TCA | ACA | 2   | C | A |   |
| TCGA-29-1775 | TTN_ENST00000359218  | p.L10450L       | c.31350C>A | Unverified | CAC        | CTC | GAC | 3   | C | A |   |
| TCGA-09-1665 | TTN_ENST00000360870  | p.A4869D        | c.14606C>A | Verified   | GAA        | GCT | TCT | 2   | C | A |   |
| TCGA-29-1770 | TUBAL3               | ENST00000380419 | p.S230Y    | c.689C>A   | Unverified | CCC | TCT | CAT | 2 | C | A |
| TCGA-61-1740 | TUBB3                | ENST00000315491 | p.F378L    | c.1134C>A  | Unverified | CTG | TTC | AAG | 3 | C | A |
| TCGA-30-1718 | TULP1                | ENST00000229771 | p.N490K    | c.1470C>A  | Unverified | AAG | AAC | TTC | 3 | C | A |
| TCGA-04-1338 | TULP2                | ENST00000221399 | p.N474K    | c.1422C>A  | Verified   | AAG | AAC | TTC | 3 | C | A |
| TCGA-30-1855 | TULP4                | ENST00000367097 | p.I348I    | c.1044C>A  | Unverified | TCC | ATC | TGC | 3 | C | A |
| TCGA-23-1124 | UBA7                 | ENST00000333486 | p.N527K    | c.1581C>A  | Verified   | gat | aac | ttt | 3 | C | A |
| TCGA-13-0760 | UHRF1BP1             | ENST00000192788 | p.L1093I   | c.3277C>A  | Verified   | CGA | CTC | CGA | 1 | C | A |
| TCGA-13-0893 | UIMC1                | ENST00000377227 | p.S27Y     | c.80C>A    | Verified   | AGT | TCT | GTC | 2 | C | A |
| TCGA-24-1103 | UMODL1               | ENST00000400424 | p.H693N    | c.2077C>A  | Verified   | TTG | CAC | CTG | 1 | C | A |
| TCGA-24-2280 | UNC13C               | ENST00000260323 | p.L597M    | c.1789C>A  | Unverified | ACC | CTG | TAT | 1 | C | A |
| TCGA-20-1685 | UNC13C               | ENST00000260323 | p.Y57*     | c.171C>A   | Unverified | TCT | TAC | ACT | 3 | C | A |
| TCGA-20-1685 | UNC13C_EN            | ENST00000260323 | p.Y57*     | c.171C>A   | Unverified | TCT | TAC | ACT | 3 | C | A |
| TCGA-13-0904 | UNC45B               | ENST00000394570 | p.R261R    | c.781C>A   | Verified   | CAT | CGA | GGG | 1 | C | A |
| TCGA-13-0904 | UNC45B               | ENST00000394570 | p.T847T    | c.2541C>A  | Verified   | ACA | ACC | CAG | 3 | C | A |
| TCGA-13-0885 | UNC5D                | ENST00000287272 | p.A240D    | c.719C>A   | Unverified | TCG | GCC | ACT | 2 | C | A |
| TCGA-61-1910 | UNC5D                | ENST00000287272 | p.T504N    | c.1511C>A  | Unverified | AGG | ACT | TTT | 2 | C | A |
| TCGA-61-1910 | UNC5D_ENS            | ENST00000404895 | p.T509N    | c.1526C>A  | Unverified | AGG | ACT | TTT | 2 | C | A |
| TCGA-20-0990 | USH2A                | ENST00000307340 | p.P139T    | c.415C>A   | Verified   | TCT | CCT | CCT | 1 | C | A |
| TCGA-61-1900 | USH2A                | ENST00000307340 | p.T1143K   | c.3428C>A  | Unverified | AAG | ACA | AAA | 2 | C | A |
| TCGA-61-1915 | USH2A                | ENST00000307340 | p.T911T    | c.2733C>A  | Unverified | GGG | ACC | ATT | 3 | C | A |
| TCGA-13-0906 | USP49                | ENST00000373006 | p.Q448K    | c.1342C>A  | Unverified | GGG | CAG | CTG | 1 | C | A |
| TCGA-20-1687 | USP6_ENST00000250066 | p.L1163L        | c.3489C>A  | Unverified | TCA        | CTC | AGC | 3   | C | A |   |
| TCGA-29-1769 | UTP20                | ENST00000261637 | p.T1129N   | c.3386C>A  | Unverified | GCA | ACC | GTA | 2 | C | A |
| TCGA-29-1693 | UTRN                 | ENST00000367545 | p.T1081N   | c.3242C>A  | Unverified | GAG | ACT | AAT | 2 | C | A |
| TCGA-23-1123 | VAX1                 | ENST00000277905 | p.S178Y    | c.533C>A   | Verified   | GAC | TCC | GGG | 2 | C | A |
| TCGA-23-1123 | VAX1                 | ENST00000277905 | p.S178Y    | c.533C>A   | Verified   | GAC | TCC | GGG | 2 | C | A |

|              |            |                 |          |            |            |     |     |     |   |   |   |
|--------------|------------|-----------------|----------|------------|------------|-----|-----|-----|---|---|---|
| TCGA-61-1906 | VCL        | ENST00000211998 | p.T1077N | c.3230C>A  | Unverified | CGG | ACC | AAC | 2 | C | A |
| TCGA-61-1906 | VCL        | ENST00000211998 | p.T1077N | c.3230C>A  | Unverified | CGG | ACC | AAC | 2 | C | A |
| TCGA-29-1691 | VDAC3      | ENST00000022615 | p.S205Y  | c.614C>A   | Unverified | ACA | TCC | ATA | 2 | C | A |
| TCGA-13-0807 | VN1R4      | ENST00000311170 | p.I107I  | c.321C>A   | Verified   | GTG | ATC | ACG | 3 | C | A |
| TCGA-09-2050 | VPS13B     | ENST00000358544 | p.A3982D | c.11945C>A | Verified   | gtg | gct | gca | 2 | C | A |
| TCGA-13-1488 | VPS13B     | ENST00000358544 | p.S899Y  | c.2696C>A  | Verified   | cct | tct | gac | 2 | C | A |
| TCGA-24-2280 | VPS13C     | ENST00000261517 | p.T3017N | c.9050C>A  | Unverified | GGT | ACC | AGA | 2 | C | A |
| TCGA-23-1111 | VPS37D     | ENST00000324941 | p.A146D  | c.437C>A   | Unverified | GAG | GCC | TTC | 2 | C | A |
| TCGA-23-2077 | VSIG2      | ENST00000326621 | p.L13M   | c.37C>A    | Unverified | GCC | CTG | CTA | 1 | C | A |
| TCGA-04-1338 | VWCE       | ENST00000335613 | p.A174A  | c.522C>A   | Unverified | TCT | GCC | GAC | 3 | C | A |
| TCGA-23-1111 | VWF        | ENST00000261405 | p.S2137Y | c.6410C>A  | Unverified | AGC | TCC | CAC | 2 | C | A |
| TCGA-61-2094 | WAPAL      | ENST00000298767 | p.N506K  | c.1518C>A  | Unverified | ACT | AAC | AAT | 3 | C | A |
| TCGA-29-1762 | WARS       | ENST00000392882 | p.C305*  | c.915C>A   | Unverified | CAG | TGC | CTT | 3 | C | A |
| TCGA-61-1910 | WDR31      | ENST00000374193 | p.L3I    | c.7C>A     | Unverified | CTG | CTA | CTC | 1 | C | A |
| TCGA-30-1718 | WDR37      | ENST00000358220 | p.P235T  | c.703C>A   | Unverified | ACA | CCC | CAG | 1 | C | A |
| TCGA-13-1496 | WDR45      | ENST00000356463 | p.S210*  | c.629C>A   | Verified   | gcc | tca | gcc | 2 | C | A |
| TCGA-09-2050 | WDR49      | ENST00000308378 | p.P293H  | c.878C>A   | Verified   | TTA | CCT | CCA | 2 | C | A |
| TCGA-24-1474 | WDR66      | ENST00000288912 | p.Y293*  | c.879C>A   | Verified   | CAA | TAC | CAC | 3 | C | A |
| TCGA-09-1674 | WDR69      | ENST00000309931 | p.I234I  | c.702C>A   | Unverified | AGA | ATC | ATC | 3 | C | A |
| TCGA-13-1497 | WDR78      | ENST00000371026 | p.D118E  | c.354C>A   | Verified   | TTT | GAC | ATA | 3 | C | A |
| TCGA-30-1714 | WDR91      | ENST00000354475 | p.Q168K  | c.502C>A   | Unverified | TTT | CAG | TGC | 1 | C | A |
| TCGA-24-2262 | WFIKKN2    | ENST00000311378 | p.C448*  | c.1344C>A  | Unverified | GCC | TGC | AAG | 3 | C | A |
| TCGA-29-1781 | WIPF1      | ENST00000392546 | p.P140H  | c.419C>A   | Unverified | AAA | CCC | TTT | 2 | C | A |
| TCGA-61-2095 | WIPF1      | ENST00000392546 | p.D371E  | c.1113C>A  | Unverified | AGG | GAC | CCG | 3 | C | A |
| TCGA-13-1498 | WNK1       | NM_018979       | p.G803G  | c.2409C>A  | Verified   | caa | ggc | gaa | 3 | C | A |
| TCGA-13-1496 | WNK3       | ENST00000354646 | p.L1121L | c.3363C>A  | Verified   | TTG | CTC | TAT | 3 | C | A |
| TCGA-24-2024 | WNT6       | ENST00000233948 | p.L130M  | c.388C>A   | Verified   | CTG | CTG | CAG | 1 | C | A |
| TCGA-24-1422 | WNT7B      | ENST00000339464 | p.T319N  | c.956C>A   | Unverified | TAC | ACC | AAG | 2 | C | A |
| TCGA-24-2267 | XAGE5      | ENST00000351072 | p.S73*   | c.218C>A   | Verified   | cag | tca | aag | 2 | C | A |
| TCGA-25-2400 | XIRP2      | ENST00000295237 | p.L1917I | c.5749C>A  | Verified   | GAG | CTT | CTC | 1 | C | A |
| TCGA-04-1649 | XIRP2      | ENST00000295237 | p.T1702K | c.5105C>A  | Unverified | GAC | ACA | ATT | 2 | C | A |
| TCGA-23-1032 | XIRP2_ENST | ENST00000409728 | p.P597T  | c.1789C>A  | Verified   | TGG | CCA | CCT | 1 | C | A |
| TCGA-30-1891 | XKRX       | NM_212559.1     | p.V353V  | c.1059C>A  | Unverified | ctc | gtc | gac | 3 | C | A |
| TCGA-04-1361 | XPC        | ENST00000285021 | p.D121E  | c.363C>A   | Verified   | GAA | GAC | AGC | 3 | C | A |

|              |           |                 |          |           |            |     |     |     |   |   |   |
|--------------|-----------|-----------------|----------|-----------|------------|-----|-----|-----|---|---|---|
| TCGA-04-1361 | XPC       | ENST00000285021 | p.D121E  | c.363C>A  | Verified   | GAA | GAC | AGC | 3 | C | A |
| TCGA-29-1763 | YARS      | ENST00000373477 | p.A291D  | c.872C>A  | Unverified | ACA | GCT | TAC | 2 | C | A |
| TCGA-30-1891 | YOD1      | ENST00000315927 | p.P278T  | c.832C>A  | Unverified | GAT | CCA | GAT | 1 | C | A |
| TCGA-13-0885 | ZAN       | ENST00000348028 | p.H1086N | c.3256C>A | Verified   | AAC | CAC | TGC | 1 | C | A |
| TCGA-13-1488 | ZBED4     | ENST00000216268 | p.Q691K  | c.2071C>A | Verified   | CCT | CAG | TAC | 1 | C | A |
| TCGA-24-1417 | ZBTB16_EN | ENST00000335953 | p.D270E  | c.810C>A  | Unverified | GGG | GAC | AAG | 3 | C | A |
| TCGA-23-1022 | ZBTB20    | ENST00000357258 | p.P623T  | c.1867C>A | Verified   | ACA | CCC | CCA | 1 | C | A |
| TCGA-24-2289 | ZBTB33    | ENST00000326624 | p.T207N  | c.620C>A  | Unverified | gag | act | ttg | 2 | C | A |
| TCGA-09-2051 | ZBTB37    | ENST00000367702 | p.S85Y   | c.254C>A  | Unverified | CTT | TCT | TTC | 2 | C | A |
| TCGA-61-1725 | ZBTB37    | ENST00000367702 | p.A51D   | c.152C>A  | Unverified | CTG | GCT | GCC | 2 | C | A |
| TCGA-61-1725 | ZBTB37_EN | ENST00000427304 | p.A51D   | c.152C>A  | Unverified | CTG | GCT | GCC | 2 | C | A |
| TCGA-24-1103 | ZBTB38    | ENST00000514251 | p.T1108N | c.3323C>A | Verified   | TCC | ACC | AAA | 2 | C | A |
| TCGA-13-0760 | ZBTB5     | ENST00000307750 | p.T121K  | c.362C>A  | Verified   | ACG | ACA | AGG | 2 | C | A |
| TCGA-04-1542 | ZC3HAV1   | ENST00000242351 | p.N163K  | c.489C>A  | Verified   | TGT | AAC | CAG | 3 | C | A |
| TCGA-23-1021 | ZCCHC6    | ENST00000375963 | p.G900G  | c.2700C>A | Verified   | TTA | GGC | GAA | 3 | C | A |
| TCGA-13-0792 | ZDHHC24   | ENST00000310442 | p.V153V  | c.459C>A  | Unverified | CAC | GTC | TCT | 3 | C | A |
| TCGA-09-1665 | ZEB2      | ENST00000303660 | p.T915N  | c.2744C>A | Verified   | cag | acc | agt | 2 | C | A |
| TCGA-30-1855 | ZFHx4     | ENST00000521891 | p.A2146D | c.6437C>A | Unverified | AGG | GCT | TAT | 2 | C | A |
| TCGA-61-2012 | ZFHx4     | ENST00000521891 | p.S720*  | c.2159C>A | Unverified | CAG | TCG | GAC | 2 | C | A |
| TCGA-61-2012 | ZFP64     | ENST00000216923 | p.P342H  | c.1025C>A | Verified   | CAT | CCT | GAG | 2 | C | A |
| TCGA-61-1913 | ZFPM2     | ENST00000407775 | p.P776T  | c.2326C>A | Unverified | GAA | CCC | ACA | 1 | C | A |
| TCGA-24-2035 | ZFYVE26   | ENST00000347230 | p.R1428R | c.4282C>A | Unverified | TCC | CGG | GCC | 1 | C | A |
| TCGA-25-1313 | ZGPAT     | ENST00000328969 | p.G25G   | c.75C>A   | Unverified | TTG | GGC | GCC | 3 | C | A |
| TCGA-13-1481 | ZMIZ1     | ENST00000334512 | p.C763*  | c.2289C>A | Verified   | cag | tgc | ttt | 3 | C | A |
| TCGA-13-0904 | ZNF133    | ENST00000377671 | p.R524R  | c.1570C>A | Verified   | TGC | CGA | GAG | 1 | C | A |
| TCGA-10-0930 | ZNF197    | ENST00000344387 | p.T28N   | c.83C>A   | Verified   | gga | acc | agc | 2 | C | A |
| TCGA-10-0930 | ZNF197    | ENST00000344387 | p.T28N   | c.83C>A   | Verified   | gga | acc | agc | 2 | C | A |
| TCGA-24-1103 | ZNF197    | ENST00000344387 | p.F575L  | c.1725C>A | Verified   | ggt | ttc | att | 3 | C | A |
| TCGA-13-0760 | ZNF277    | ENST00000361822 | p.Q130K  | c.388C>A  | Verified   | GAA | CAA | GAG | 1 | C | A |
| TCGA-13-1481 | ZNF32     | ENST00000395797 | p.Q74K   | c.220C>A  | Verified   | AGA | CAA | AGG | 1 | C | A |
| TCGA-04-1362 | ZNF354A   | ENST00000335815 | p.T377N  | c.1130C>A | Verified   | CAC | ACT | GGA | 2 | C | A |
| TCGA-23-1116 | ZNF365    | ENST00000395254 | p.L194M  | c.580C>A  | Unverified | GAA | CTG | TTG | 1 | C | A |
| TCGA-23-1116 | ZNF365_EN | ENST00000410046 | p.L194M  | c.580C>A  | Unverified | GAA | CTG | TTG | 1 | C | A |
| TCGA-30-1714 | ZNF366    | ENST00000318442 | p.Y626*  | c.1878C>A | Unverified | TGC | TAC | GAG | 3 | C | A |

|              |            |                     |          |           |            |     |     |     |   |   |   |
|--------------|------------|---------------------|----------|-----------|------------|-----|-----|-----|---|---|---|
| TCGA-61-1910 | ZNF383     | ENST00000352998     | p.Q60K   | c.178C>A  | Unverified | GAA | CAA | GGG | 1 | C | A |
| TCGA-23-1021 | ZNF449     | ENST00000339249     | p.Q211K  | c.631C>A  | Verified   | tta | cag | gat | 1 | C | A |
| TCGA-61-1738 | ZNF462     | ENST00000277225     | p.D2403E | c.7209C>A | Unverified | TCT | GAC | CAC | 3 | C | A |
| TCGA-61-1738 | ZNF462     | ENST00000277225     | p.D2403E | c.7209C>A | Unverified | TCT | GAC | CAC | 3 | C | A |
| TCGA-13-0760 | ZNF488     | ENST00000395702     | p.L192M  | c.574C>A  | Verified   | GAG | CTG | TCT | 1 | C | A |
| TCGA-24-2289 | ZNF521     | NM_015461.1         | p.N989K  | c.2967C>A | Unverified | gga | aac | tgc | 3 | C | A |
| TCGA-29-1784 | ZNF536     | ENST00000355537     | p.A46A   | c.138C>A  | Unverified | CAT | GCC | TTC | 3 | C | A |
| TCGA-13-0760 | ZNF568     | ENST00000333987     | p.S166*  | c.497C>A  | Verified   | AGT | TCA | GAC | 2 | C | A |
| TCGA-13-0793 | ZNF592     | ENST00000299927     | p.T1024N | c.3071C>A | Verified   | CAC | ACC | CCC | 2 | C | A |
| TCGA-29-1766 | ZNF626_ENS | ENST00000305570     | p.L85I   | c.253C>A  | Unverified | GAC | CTT | TGG | 1 | C | A |
| TCGA-25-2391 | ZNF629     | ENST00000262525     | p.N302K  | c.906C>A  | Unverified | CAG | AAC | CAC | 3 | C | A |
| TCGA-61-1740 | ZNF644     | ENST00000370440     | p.H985N  | c.2953C>A | Unverified | GGG | CAT | CTT | 1 | C | A |
| TCGA-23-1029 | ZNF676     | ENST00000397121     | p.T459T  | c.1377C>A | Unverified | TTC | ACC | TGG | 3 | C | A |
| TCGA-13-1488 | ZNF677     | ENST00000333952     | p.A439D  | c.1316C>A | Verified   | AGG | GCT | TTT | 2 | C | A |
| TCGA-09-2049 | ZNF680     | ENST00000309683     | p.A19D   | c.56C>A   | Verified   | GTG | GCC | ATA | 2 | C | A |
| TCGA-24-1464 | ZNF706     | ENST00000311212     | p.C41*   | c.123C>A  | Verified   | ACC | TGC | ACT | 3 | C | A |
| TCGA-13-0920 | ZNF711     | NM_021998.2         | p.L587I  | c.1759C>A | Verified   | gag | ctt | caa | 1 | C | A |
| TCGA-13-0807 | ZNF737     | ENST00000344519_v61 | p.L243I  | c.727C>A  | Verified   | ACA | CAT | AAG | 1 | C | A |
| TCGA-61-2102 | ZNF761     | ENST00000334095     | p.S146*  | c.437C>A  | Verified   | TCT | TCA | TTA | 2 | C | A |
| TCGA-13-0791 | ZNF799     | ENST00000357979     | p.A299D  | c.896C>A  | Verified   | AAA | GCC | TTC | 2 | C | A |
| TCGA-24-1844 | ZNF804A    | ENST00000302277     | p.P1077T | c.3229C>A | Unverified | CCC | CCT | AGC | 1 | C | A |
| TCGA-13-0916 | ZNF804A    | ENST00000302277     | p.A217E  | c.650C>A  | Verified   | TTT | GCA | TTT | 2 | C | A |
| TCGA-25-2400 | ZNF804A    | ENST00000302277     | p.I212I  | c.636C>A  | Verified   | AAA | ATC | GGC | 3 | C | A |
| TCGA-13-0923 | ZNF804B    | ENST00000333190     | p.T685T  | c.2055C>A | Verified   | ATG | ACC | AGC | 3 | C | A |
| TCGA-24-2280 | ZNF831     | ENST00000371030     | p.P1529T | c.4585C>A | Unverified | TCC | CCA | GAC | 1 | C | A |
| TCGA-25-2042 | ZNRF3      | ENST00000406323     | p.P805H  | c.2414C>A | Unverified | TTC | CCT | AGT | 2 | C | A |
| TCGA-13-0795 | ZPLD1      | ENST00000306176     | p.P275T  | c.823C>A  | Verified   | GAC | CCT | CAG | 1 | C | A |
| TCGA-24-1850 | ZSCAN1     | ENST00000282326     | p.L220I  | c.658C>A  | Unverified | GAC | CTT | CTC | 1 | C | A |
| TCGA-23-1117 | ZSCAN20    | ENST00000326544     | p.T109N  | c.326C>A  | Verified   | CAG | ACC | TGG | 2 | C | A |
| TCGA-23-1117 | ZSCAN20    | ENST00000326544     | p.T109N  | c.326C>A  | Verified   | CAG | ACC | TGG | 2 | C | A |
| TCGA-25-1326 | AARS       | ENST00000261772     | p.R962R  | c.2886C>G | Unverified | CTG | CGC | CTC | 3 | C | G |
| TCGA-25-2042 | ABCA12     | ENST00000272895     | p.L2455V | c.7363C>G | Verified   | GCT | CTC | TGT | 1 | C | G |
| TCGA-09-2056 | ABCA3      | ENST00000301732     | p.I703M  | c.2109C>G | Verified   | GCC | ATC | TGG | 3 | C | G |
| TCGA-29-1711 | ABCA5      | ENST00000392676     | p.H1394D | c.4180C>G | Unverified | GAA | CAT | TTT | 1 | C | G |

|              |            |                     |          |           |            |     |     |     |   |   |   |
|--------------|------------|---------------------|----------|-----------|------------|-----|-----|-----|---|---|---|
| TCGA-29-1711 | ABCA5      | ENST00000392676     | p.H1394D | c.4180C>G | Unverified | GAA | CAT | TTT | 1 | C | G |
| TCGA-13-0900 | ABCB4      | ENST00000359206     | p.T685S  | c.2054C>G | Verified   | GAA | ACC | GAT | 2 | C | G |
| TCGA-20-1685 | ABCB5      | ENST00000258738     | p.Q500E  | c.1498C>G | Unverified | ATT | CAA | GCT | 1 | C | G |
| TCGA-20-1685 | ABCB5_ENS  | ENST00000404938     | p.Q945E  | c.2833C>G | Unverified | ATT | CAA | GCT | 1 | C | G |
| TCGA-36-1577 | ABCC2      | ENST00000370449     | p.S789C  | c.2366C>G | Verified   | CTG | TCT | GCA | 2 | C | G |
| TCGA-09-2044 | ABCF3      | ENST00000429586     | p.T533T  | c.1599C>G | Verified   | TCT | ACC | ATG | 3 | C | G |
| TCGA-13-0903 | ABI3BP     | ENST00000284322     | p.D203E  | c.609C>G  | Verified   | AAA | GAC | AAT | 3 | C | G |
| TCGA-13-1496 | AC013469_ξ | ENST00000408934     | p.G17G   | c.51C>G   | Verified   | CAC | GGC | TTT | 3 | C | G |
| TCGA-29-1766 | AC022601.1 | ENST00000554864     | p.T179R  | c.536C>G  | Unverified | CCC | ACG | GCA | 2 | C | G |
| TCGA-29-1766 | AC022601.1 | ENST00000554864_v68 | p.T179R  | c.536C>G  | Unverified | CCC | ACG | GCA | 2 | C | G |
| TCGA-10-0930 | ACACB      | ENST00000377848     | p.T1128R | c.3383C>G | Verified   | AAA | ACA | GTG | 2 | C | G |
| TCGA-10-0930 | ACACB      | ENST00000377848     | p.T1128R | c.3383C>G | Verified   | AAA | ACA | GTG | 2 | C | G |
| TCGA-29-1769 | ACACB      | ENST00000377848     | p.P1260R | c.3779C>G | Unverified | TGC | CCC | GAG | 2 | C | G |
| TCGA-24-2280 | ACADSB     | ENST00000358776     | p.T155R  | c.464C>G  | Unverified | GGA | ACA | GAA | 2 | C | G |
| TCGA-13-1510 | ACD        | ENST00000219251     | p.L95V   | c.283C>G  | Unverified | GTC | CTA | CGG | 1 | C | G |
| TCGA-13-1501 | ACLY       | ENST00000352035     | p.A1048G | c.3143C>G | Verified   | gaa | gct | gat | 2 | C | G |
| TCGA-13-1501 | ACLY       | ENST00000352035     | p.A1048G | c.3143C>G | Verified   | gaa | gct | gat | 2 | C | G |
| TCGA-23-1022 | ACOT9      | ENST00000336430     | p.A205G  | c.614C>G  | Verified   | gtg | gct | cgt | 2 | C | G |
| TCGA-29-2427 | ACRC       | ENST00000373695     | p.P405A  | c.1213C>G | Verified   | GCA | CCT | GTG | 1 | C | G |
| TCGA-13-0884 | ACSM5      | ENST00000331849     | p.I509M  | c.1527C>G | Verified   | CCC | ATC | AGG | 3 | C | G |
| TCGA-25-2391 | ACTG1      | ENST00000331925     | p.L180V  | c.538C>G  | Unverified | GAC | CTG | GCT | 1 | C | G |
| TCGA-13-0919 | ACTR1A     | ENST00000369905     | p.T340R  | c.1019C>G | Unverified | TCC | ACG | TGG | 2 | C | G |
| TCGA-25-1313 | ADAM30     | ENST00000369400     | p.A437G  | c.1310C>G | Verified   | ggt | gcc | aac | 2 | C | G |
| TCGA-25-2042 | ADAMTS1    | ENST00000284984     | p.L185V  | c.553C>G  | Unverified | CAC | CTC | CTG | 1 | C | G |
| TCGA-25-1313 | ADAMTS12   | ENST00000504830     | p.N494K  | c.1482C>G | Verified   | gaa | aac | gtc | 3 | C | G |
| TCGA-04-1362 | ADAMTS3    | ENST00000286657     | p.P736A  | c.2206C>G | Verified   | CCC | CCT | GGG | 1 | C | G |
| TCGA-29-1699 | ADAMTS3    | ENST00000286657     | p.T981T  | c.2943C>G | Unverified | GTG | ACC | TGC | 3 | C | G |
| TCGA-20-0991 | ADAMTS4    | ENST00000367996     | p.H486Q  | c.1458C>G | Verified   | AAA | CAC | TCG | 3 | C | G |
| TCGA-61-1737 | ADAMTS4    | ENST00000367996     | p.S385R  | c.1155C>G | Unverified | TTG | AGC | ACC | 3 | C | G |
| TCGA-61-1737 | ADAMTS4_E  | ENST00000367996     | p.S385R  | c.1155C>G | Unverified | TTG | AGC | ACC | 3 | C | G |
| TCGA-04-1649 | ADAMTS9    | ENST00000498707     | p.S290S  | c.870C>G  | Unverified | tta | tcc | tat | 3 | C | G |
| TCGA-13-0755 | ADAMTSL3   | ENST00000286744     | p.R938G  | c.2812C>G | Unverified | CGA | CGA | TTC | 1 | C | G |
| TCGA-13-0893 | ADAMTSL3   | ENST00000286744     | p.I195M  | c.585C>G  | Verified   | TGT | ATC | AGT | 3 | C | G |
| TCGA-61-1737 | ADAMTSL4   | ENST00000369038     | p.P154A  | c.460C>G  | Unverified | AAG | CCA | GGA | 1 | C | G |



|              |           |                 |          |            |            |     |     |     |   |   |   |
|--------------|-----------|-----------------|----------|------------|------------|-----|-----|-----|---|---|---|
| TCGA-13-0905 | ADC       | ENST00000373443 | p.P75R   | c.224C>G   | Verified   | AGC | CCA | GGT | 2 | C | G |
| TCGA-23-1114 | ADCY2     | ENST00000338316 | p.L315V  | c.943C>G   | Unverified | ATG | CTG | AAT | 1 | C | G |
| TCGA-04-1651 | ADCY9     | ENST00000294016 | p.G402G  | c.1206C>G  | Unverified | GTG | GGC | TTC | 3 | C | G |
| TCGA-04-1651 | ADCY9     | ENST00000294016 | p.G402G  | c.1206C>G  | Unverified | GTG | GGC | TTC | 3 | C | G |
| TCGA-13-1488 | ADRA1A    | ENST00000380586 | p.H256Q  | c.768C>G   | Verified   | ACG | CAC | TTC | 3 | C | G |
| TCGA-24-1103 | ADSS      | ENST00000366535 | p.T361T  | c.1083C>G  | Verified   | ctt | acc | aag | 3 | C | G |
| TCGA-23-1110 | AHNAK     | ENST00000378024 | p.S5125C | c.15374C>G | Verified   | CTT | TCT | TTG | 2 | C | G |
| TCGA-13-0924 | AHNAK     | ENST00000378024 | p.I2702M | c.8106C>G  | Verified   | AAT | ATC | AAA | 3 | C | G |
| TCGA-24-1417 | AHNAK     | ENST00000378024 | p.V2131V | c.6393C>G  | Unverified | AAA | GTC | AAA | 3 | C | G |
| TCGA-24-2280 | AIG1      | ENST00000357847 | p.L42V   | c.124C>G   | Unverified | TTC | CTG | ACG | 1 | C | G |
| TCGA-13-1501 | AK3       | ENST00000381809 | p.Q179E  | c.535C>G   | Verified   | GAC | CAA | ACA | 1 | C | G |
| TCGA-13-1501 | AK3       | ENST00000381809 | p.Q179E  | c.535C>G   | Verified   | GAC | CAA | ACA | 1 | C | G |
| TCGA-61-1904 | AKAP13    | ENST00000361243 | p.P733A  | c.2197C>G  | Unverified | tgt | cct | ttc | 1 | C | G |
| TCGA-61-1904 | AKAP13_EN | ENST00000394518 | p.P733A  | c.2197C>G  | Unverified | TGT | CCT | TTC | 1 | C | G |
| TCGA-23-1022 | AKAP6     | ENST00000280979 | p.S2179C | c.6536C>G  | Verified   | GAA | TCT | GCA | 2 | C | G |
| TCGA-04-1362 | AKAP7     | NM_016377.2     | p.P269P  | c.807C>G   | Verified   | gag | ccc | gat | 3 | C | G |
| TCGA-29-1769 | AKAP7     | NM_016377.2     | p.S307R  | c.921C>G   | Unverified | ggg | agc | tct | 3 | C | G |
| TCGA-29-1769 | AKAP7_ENS | ENST00000474850 | p.S85R   | c.255C>G   | Unverified | GGG | AGC | TCT | 3 | C | G |
| TCGA-23-1123 | AKNA      | ENST00000307564 | p.P226R  | c.677C>G   | Verified   | GGC | CCC | CAG | 2 | C | G |
| TCGA-23-1123 | AKNA      | ENST00000307564 | p.P226R  | c.677C>G   | Verified   | GGC | CCC | CAG | 2 | C | G |
| TCGA-13-0885 | ALDH2     | ENST00000261733 | p.L189L  | c.567C>G   | Verified   | CCG | CTC | CTG | 3 | C | G |
| TCGA-13-1497 | ALG11     | ENST00000521508 | p.Q90E   | c.268C>G   | Verified   | CTG | CAG | AAA | 1 | C | G |
| TCGA-24-1103 | ALG8      | ENST00000299626 | p.R41G   | c.121C>G   | Verified   | CAC | CGA | AAC | 1 | C | G |
| TCGA-29-1695 | ALMS1     | ENST00000264448 | p.L2264V | c.6790C>G  | Unverified | ACA | CTT | TTG | 1 | C | G |
| TCGA-24-1604 | ALOX5     | ENST00000374391 | p.T138R  | c.413C>G   | Verified   | gaa | aca | cgg | 2 | C | G |
| TCGA-13-0916 | ALPK2     | NM_052947       | p.S504C  | c.1511C>G  | Verified   | ctg | tcc | cag | 2 | C | G |
| TCGA-13-0916 | ALPK2_ENS | ENST00000361673 | p.S1143C | c.3428C>G  | Verified   | CTG | TCC | CAG | 2 | C | G |
| TCGA-30-1714 | ALPP      | ENST00000392027 | p.D450E  | c.1350C>G  | Unverified | CTG | GAC | GAA | 3 | C | G |
| TCGA-29-1784 | AMFR      | ENST00000290649 | p.L354V  | c.1060C>G  | Unverified | AAA | CTG | CCC | 1 | C | G |
| TCGA-13-0906 | ANK3      | ENST00000280772 | p.L1171V | c.3511C>G  | Verified   | GCC | CTA | ACT | 1 | C | G |
| TCGA-13-1489 | ANK3      | ENST00000280772 | p.H3008Q | c.9024C>G  | Verified   | CAG | CAC | TTT | 3 | C | G |
| TCGA-13-0793 | ANKAR     | ENST00000313581 | p.Q1254E | c.3760C>G  | Verified   | TTT | CAA | ATG | 1 | C | G |
| TCGA-24-1103 | ANKAR     | ENST00000313581 | p.L1109V | c.3325C>G  | Verified   | TTT | CTT | GAA | 1 | C | G |
| TCGA-13-0792 | ANKHD1    | ENST00000360839 | p.N1477K | c.4431C>G  | Verified   | gaa | aac | aaa | 3 | C | G |

|              |            |                 |          |            |            |     |     |     |   |   |   |
|--------------|------------|-----------------|----------|------------|------------|-----|-----|-----|---|---|---|
| TCGA-13-0792 | ANKHD1-EIF | ENST00000297183 | p.N1477K | c.4431C>G  | Verified   | GAA | AAC | AAA | 3 | C | G |
| TCGA-04-1367 | ANKRD11    | ENST00000301030 | p.S1518C | c.4553C>G  | Verified   | AAG | TCC | AGG | 2 | C | G |
| TCGA-61-1907 | ANKRD12    | ENST00000262126 | p.Q455E  | c.1363C>G  | Unverified | ATG | CAA | ACC | 1 | C | G |
| TCGA-13-0900 | ANKRD17    | NM_032217.3     | p.S2255R | c.6765C>G  | Verified   | ttt | agc | aca | 3 | C | G |
| TCGA-13-1510 | ANKRD27    | ENST00000306065 | p.L619V  | c.1855C>G  | Unverified | CAC | CTG | TCC | 1 | C | G |
| TCGA-61-2113 | ANKS4B     | ENST00000311620 | p.P299R  | c.896C>G   | Verified   | CTG | CCC | AGT | 2 | C | G |
| TCGA-23-1110 | ANKS6      | ENST00000353234 | p.A693G  | c.2078C>G  | Verified   | CCA | GCA | CCG | 2 | C | G |
| TCGA-24-2024 | AP2A1      | ENST00000359032 | p.N103K  | c.309C>G   | Verified   | GTG | AAC | TCG | 3 | C | G |
| TCGA-29-1776 | APC        | ENST00000457016 | p.P2808A | c.8422C>G  | Unverified | ACT | CCA | GTG | 1 | C | G |
| TCGA-23-1022 | APC        | ENST00000457016 | p.S2005* | c.6014C>G  | Verified   | GCA | TCA | GGC | 2 | C | G |
| TCGA-30-1855 | APC        | ENST00000457016 | p.A928A  | c.2784C>G  | Unverified | GCT | GCC | CAT | 3 | C | G |
| TCGA-23-1029 | APCS       | ENST00000255040 | p.D180E  | c.540C>G   | Unverified | TGG | GAC | TCT | 3 | C | G |
| TCGA-04-1356 | APLP1      | ENST00000221891 | p.L603L  | c.1809C>G  | Verified   | CTG | CTC | CTG | 3 | C | G |
| TCGA-29-1764 | APOB       | ENST00000233242 | p.T2596S | c.7787C>G  | Unverified | GGG | ACC | ATG | 2 | C | G |
| TCGA-13-1496 | APOB       | ENST00000233242 | p.I4266M | c.12798C>G | Verified   | GTA | ATC | TCG | 3 | C | G |
| TCGA-25-1313 | APOLD1     | ENST00000356591 | p.F141L  | c.423C>G   | Verified   | TTT | TTC | TGC | 3 | C | G |
| TCGA-23-1124 | ARFIP1     | ENST00000353617 | p.Q294E  | c.880C>G   | Verified   | TCA | CAG | CAT | 1 | C | G |
| TCGA-04-1367 | ARHGAP21   | NM_020824.2     | p.S1224S | c.3672C>G  | Verified   | aaa | tcc | ttc | 3 | C | G |
| TCGA-13-1509 | ARHGAP21   | NM_020824.2     | p.N1061K | c.3183C>G  | Verified   | tac | aac | aat | 3 | C | G |
| TCGA-23-1022 | ARHGAP30   | ENST00000368013 | p.Q777E  | c.2329C>G  | Verified   | GAT | CAA | GTT | 1 | C | G |
| TCGA-23-1117 | ARHGEF15   | ENST00000361926 | p.P54A   | c.160C>G   | Verified   | gca | cca | acc | 1 | C | G |
| TCGA-23-1117 | ARHGEF15   | ENST00000361926 | p.P54A   | c.160C>G   | Verified   | gca | cca | acc | 1 | C | G |
| TCGA-24-2288 | ARHGEF19   | ENST00000270747 | p.R185G  | c.553C>G   | Unverified | acc | cga | gtg | 1 | C | G |
| TCGA-13-0900 | ARHGEF40   | ENST00000298694 | p.P655A  | c.1963C>G  | Verified   | AAG | CCA | GAG | 1 | C | G |
| TCGA-10-0930 | ARID1A     | ENST00000324856 | p.S664*  | c.1991C>G  | Verified   | aca | tca | ggg | 2 | C | G |
| TCGA-10-0930 | ARID1A     | ENST00000324856 | p.S664*  | c.1991C>G  | Verified   | aca | tca | ggg | 2 | C | G |
| TCGA-13-1505 | ARL15_ENST | ENST00000504924 | p.L11V   | c.31C>G    | Unverified | TTT | CTG | TAC | 1 | C | G |
| TCGA-24-2267 | ARL4D      | ENST00000320033 | p.P17R   | c.50C>G    | Verified   | ttg | ccc | cac | 2 | C | G |
| TCGA-13-0919 | ARMCX2     | ENST00000330154 | p.T358T  | c.1074C>G  | Verified   | gag | acc | cag | 3 | C | G |
| TCGA-61-2012 | ARMCX3     | ENST00000341189 | p.A96G   | c.287C>G   | Verified   | agg | gcc | agg | 2 | C | G |
| TCGA-23-1114 | AR SJ      | ENST00000315366 | p.I144M  | c.432C>G   | Unverified | TCT | ATC | ATA | 3 | C | G |
| TCGA-29-1784 | ASAP3      | ENST00000336689 | p.N730K  | c.2190C>G  | Unverified | AGC | AAC | AAG | 3 | C | G |
| TCGA-04-1638 | ASL        | ENST00000304874 | p.A390G  | c.1169C>G  | Unverified | GAG | GCC | TCC | 2 | C | G |
| TCGA-23-1022 | ASNS       | ENST00000175506 | p.Y488*  | c.1464C>G  | Verified   | GAA | TAC | GTT | 3 | C | G |

|              |            |                 |          |           |            |     |     |     |   |   |   |
|--------------|------------|-----------------|----------|-----------|------------|-----|-----|-----|---|---|---|
| TCGA-23-1022 | ASNS_ENST  | ENST00000394309 | p.Y488*  | c.1464C>G | Verified   | GAA | TAC | GTT | 3 | C | G |
| TCGA-29-1776 | ASPCR1_EN  | ENST00000306729 | p.V564V  | c.1692C>G | Unverified | GGT | GTC | TAC | 3 | C | G |
| TCGA-24-2262 | ASRGL1     | ENST00000301776 | p.P135A  | c.403C>G  | Unverified | ATT | CCT | GGA | 1 | C | G |
| TCGA-13-0885 | ASTN1      | ENST00000361833 | p.V186V  | c.558C>G  | Verified   | cgg | gtc | ccg | 3 | C | G |
| TCGA-29-1761 | ASXL3_ENST | ENST00000269197 | p.I1102M | c.3306C>G | Unverified | CAC | ATC | AAA | 3 | C | G |
| TCGA-23-1124 | ATAD2B_EN  | ENST00000238789 | p.S1202C | c.3605C>G | Verified   | TTA | TCT | ATG | 2 | C | G |
| TCGA-13-0807 | ATF7       | ENST00000328463 | p.L109V  | c.325C>G  | Verified   | TCT | CTG | CCT | 1 | C | G |
| TCGA-24-1849 | ATG4D      | ENST00000309469 | p.C330W  | c.990C>G  | Unverified | CTG | TGC | CTG | 3 | C | G |
| TCGA-61-1914 | ATP11C     | ENST00000327569 | p.R19G   | c.55C>G   | Unverified | AAA | CGA | GTT | 1 | C | G |
| TCGA-24-1474 | ATP11C     | ENST00000327569 | p.S570W  | c.1709C>G | Verified   | GAC | TCG | GCA | 2 | C | G |
| TCGA-61-1914 | ATP11C_EN  | ENST00000361648 | p.R19G   | c.55C>G   | Unverified | AAA | CGA | GTT | 1 | C | G |
| TCGA-04-1530 | ATP13A2    | ENST00000326735 | p.P606A  | c.1816C>G | Unverified | CCC | CCA | CTT | 1 | C | G |
| TCGA-61-1895 | ATP8B1     | ENST00000283684 | p.P610A  | c.1828C>G | Unverified | ACC | CCA | GAA | 1 | C | G |
| TCGA-61-2102 | ATP9B      | ENST00000307671 | p.Q42E   | c.124C>G  | Verified   | tac | cag | ctg | 1 | C | G |
| TCGA-04-1367 | ATXN10     | ENST00000252934 | p.S127C  | c.380C>G  | Verified   | GAA | TCT | CTG | 2 | C | G |
| TCGA-13-0893 | ATXN2L     | ENST00000336783 | p.P783A  | c.2347C>G | Verified   | ACG | CCC | TAT | 1 | C | G |
| TCGA-29-1696 | ATXN7L2    | ENST00000369870 | p.P73R   | c.218C>G  | Unverified | TGC | CCT | GCC | 2 | C | G |
| TCGA-29-1696 | ATXN7L2    | ENST00000369870 | p.P73R   | c.218C>G  | Unverified | TGC | CCT | GCC | 2 | C | G |
| TCGA-24-1847 | ATXN7L3    | ENST00000389384 | p.G46G   | c.138C>G  | Unverified | TGT | GGC | TAC | 3 | C | G |
| TCGA-13-0761 | AURKC      | ENST00000448930 | p.H52D   | c.154C>G  | Unverified | GAG | CAC | CAG | 1 | C | G |
| TCGA-13-0761 | AURKC      | ENST00000448930 | p.H52D   | c.154C>G  | Unverified | GAG | CAC | CAG | 1 | C | G |
| TCGA-23-1032 | AZI1       | ENST00000374782 | p.L919V  | c.2755C>G | Unverified | CAG | CTT | GGG | 1 | C | G |
| TCGA-23-2078 | B3GALT4    | ENST00000451237 | p.L16V   | c.46C>G   | Unverified | CTG | CTG | GTG | 1 | C | G |
| TCGA-04-1367 | B3GAT2     | ENST00000230053 | p.L277V  | c.829C>G  | Verified   | TTT | CTC | AAA | 1 | C | G |
| TCGA-13-0905 | B3GAT3     | ENST00000265471 | p.N162K  | c.486C>G  | Unverified | CGG | AAC | AAG | 3 | C | G |
| TCGA-23-1117 | BACE1      | ENST00000313005 | p.A419G  | c.1256C>G | Verified   | AGC | GCT | TGC | 2 | C | G |
| TCGA-23-1117 | BACE1      | ENST00000313005 | p.A419G  | c.1256C>G | Verified   | AGC | GCT | TGC | 2 | C | G |
| TCGA-13-0760 | BAI3       | ENST00000370598 | p.H577D  | c.1729C>G | Verified   | CAG | CAT | TCA | 1 | C | G |
| TCGA-30-1714 | BARHL2     | ENST00000370445 | p.P225R  | c.674C>G  | Unverified | AGT | CCC | CCT | 2 | C | G |
| TCGA-13-0755 | BARHL2     | ENST00000370445 | p.Y304*  | c.912C>G  | Verified   | AAC | TAC | TCG | 3 | C | G |
| TCGA-30-1856 | BAZ2B      | ENST00000392783 | p.L95V   | c.283C>G  | Unverified | ACA | CTT | GGT | 1 | C | G |
| TCGA-13-0762 | BBS10      | ENST00000393262 | p.P458R  | c.1373C>G | Verified   | GCA | CCA | GAT | 2 | C | G |
| TCGA-13-0762 | BBS10      | ENST00000393262 | p.P458R  | c.1373C>G | Verified   | GCA | CCA | GAT | 2 | C | G |
| TCGA-24-1847 | BCAN       | ENST00000329117 | p.A369G  | c.1106C>G | Unverified | CCA | GCC | TCC | 2 | C | G |

|              |            |                 |          |           |            |     |     |     |   |   |   |
|--------------|------------|-----------------|----------|-----------|------------|-----|-----|-----|---|---|---|
| TCGA-30-1891 | BCAN       | ENST00000329117 | p.S419C  | c.1256C>G | Unverified | AGC | TCC | ACT | 2 | C | G |
| TCGA-20-0990 | BCAN       | ENST00000329117 | p.Y104*  | c.312C>G  | Verified   | GCC | TAC | CGG | 3 | C | G |
| TCGA-24-1847 | BCAN_ENST  | ENST00000361588 | p.A369G  | c.1106C>G | Unverified | CCA | GCC | TCC | 2 | C | G |
| TCGA-04-1347 | BCAR3      | ENST00000260502 | p.Q197E  | c.589C>G  | Verified   | gct | cag | cac | 1 | C | G |
| TCGA-24-1604 | BCCIP      | ENST00000299130 | p.L150V  | c.448C>G  | Verified   | GTT | CTA | CGC | 1 | C | G |
| TCGA-61-1740 | BCL9L      | NM_182557.1     | p.P694P  | c.2082C>G | Unverified | cgc | ccc | ctg | 3 | C | G |
| TCGA-61-1740 | BCL9L_ENST | ENST00000392849 | p.P694P  | c.2082C>G | Unverified | CGC | CCC | CTG | 3 | C | G |
| TCGA-29-1768 | BCORL1     | ENST00000218147 | p.D100E  | c.300C>G  | Unverified | atg | gac | tac | 3 | C | G |
| TCGA-25-1318 | BEND2      | ENST00000380033 | p.A383G  | c.1148C>G | Verified   | CCA | GCC | TCT | 2 | C | G |
| TCGA-25-1318 | BEND2      | ENST00000380033 | p.A383G  | c.1148C>G | Verified   | CCA | GCC | TCT | 2 | C | G |
| TCGA-10-0930 | BHLHB9     | ENST00000457056 | p.S235C  | c.704C>G  | Verified   | AGA | TCC | CAG | 2 | C | G |
| TCGA-10-0930 | BHLHB9     | ENST00000457056 | p.S235C  | c.704C>G  | Verified   | AGA | TCC | CAG | 2 | C | G |
| TCGA-24-1469 | BHLHE40    | ENST00000256495 | p.P324A  | c.970C>G  | Verified   | CTG | CCC | TTC | 1 | C | G |
| TCGA-23-1124 | BHMT       | ENST00000274353 | p.T339S  | c.1016C>G | Verified   | CAC | ACC | AAA | 2 | C | G |
| TCGA-13-0886 | BIN1       | ENST00000316724 | p.V281V  | c.843C>G  | Unverified | acg | gtc | aag | 3 | C | G |
| TCGA-13-0884 | BIRC3      | ENST00000263464 | p.S248C  | c.743C>G  | Verified   | gtt | tct | aat | 2 | C | G |
| TCGA-23-1110 | BIRC3      | ENST00000263464 | p.T536R  | c.1607C>G | Verified   | ccc | aca | gaa | 2 | C | G |
| TCGA-23-1031 | BIRC6      | ENST00000421745 | p.Q1771E | c.5311C>G | Verified   | CTT | CAA | CCT | 1 | C | G |
| TCGA-23-1124 | BMP2K_ENS  | ENST00000335016 | p.T360S  | c.1079C>G | Verified   | GAT | ACC | ATT | 2 | C | G |
| TCGA-23-1022 | BMPER      | ENST00000297161 | p.L93V   | c.277C>G  | Verified   | GCC | CTG | GCC | 1 | C | G |
| TCGA-61-1733 | BMS1       | ENST00000374518 | p.S122*  | c.365C>G  | Unverified | GTG | TCA | GGT | 2 | C | G |
| TCGA-61-1733 | BMS1       | ENST00000374518 | p.S122*  | c.365C>G  | Unverified | GTG | TCA | GGT | 2 | C | G |
| TCGA-13-0920 | BNC2       | ENST00000380672 | p.P382R  | c.1145C>G | Verified   | ACA | CCC | AAT | 2 | C | G |
| TCGA-09-2050 | BPIL1      | ENST00000170150 | p.F99L   | c.297C>G  | Verified   | ACT | TTC | AAG | 3 | C | G |
| TCGA-29-1781 | BPTF       | ENST00000306378 | p.Q2286E | c.6856C>G | Unverified | CCC | CAG | TCC | 1 | C | G |
| TCGA-29-1781 | BPTF_ENSTC | ENST00000335221 | p.Q2412E | c.7234C>G | Unverified | CCC | CAG | TCC | 1 | C | G |
| TCGA-04-1347 | BRAF       | ENST00000288602 | p.S637*  | c.1910C>G | Verified   | cag | tca | gat | 2 | C | G |
| TCGA-04-1331 | BRPF1      | ENST00000383829 | p.H541Q  | c.1623C>G | Verified   | CTG | CAC | AGC | 3 | C | G |
| TCGA-13-0885 | BRS3       | ENST00000370648 | p.S231C  | c.692C>G  | Verified   | ctc | tct | att | 2 | C | G |
| TCGA-13-0807 | BRWD3      | ENST00000373275 | p.S1500* | c.4499C>G | Verified   | GTT | TCA | GAT | 2 | C | G |
| TCGA-61-1915 | BSN        | ENST00000296452 | p.P1410R | c.4229C>G | Unverified | AGT | CCT | TCA | 2 | C | G |
| TCGA-61-1907 | BSND       | ENST00000371265 | p.L141V  | c.421C>G  | Unverified | AAG | CTG | GGA | 1 | C | G |
| TCGA-10-0930 | BTBD1      | ENST00000261721 | p.H174D  | c.520C>G  | Verified   | AAA | CAT | CTT | 1 | C | G |
| TCGA-10-0930 | BTBD1      | ENST00000261721 | p.H174D  | c.520C>G  | Verified   | AAA | CAT | CTT | 1 | C | G |

|              |            |                 |          |           |            |     |     |     |   |   |   |
|--------------|------------|-----------------|----------|-----------|------------|-----|-----|-----|---|---|---|
| TCGA-04-1347 | BTBD3      | ENST00000378226 | p.T218S  | c.653C>G  | Verified   | GAG | ACC | AGC | 2 | C | G |
| TCGA-29-1784 | BTN3A3     | ENST00000244519 | p.L532V  | c.1594C>G | Unverified | TCC | CTG | GAG | 1 | C | G |
| TCGA-25-1313 | BZRAP1     | ENST00000343736 | p.S1768S | c.5304C>G | Unverified | CAC | TCC | ATG | 3 | C | G |
| TCGA-30-1856 | C10orf18   | ENST00000328090 | p.S2014C | c.6041C>G | Unverified | ATC | TCC | ATT | 2 | C | G |
| TCGA-24-1422 | C10orf46   | ENST00000369151 | p.P70A   | c.208C>G  | Unverified | GGC | CCC | AAG | 1 | C | G |
| TCGA-25-2392 | C11orf65   | ENST00000393084 | p.A59G   | c.176C>G  | Unverified | GAG | GCA | GAG | 2 | C | G |
| TCGA-09-2049 | C12orf35   | ENST00000312561 | p.A586G  | c.1757C>G | Verified   | CTC | GCT | TTG | 2 | C | G |
| TCGA-09-2051 | C12orf35   | ENST00000312561 | p.A389G  | c.1166C>G | Unverified | GTT | GCA | AAA | 2 | C | G |
| TCGA-25-2398 | C13orf23   | ENST00000352251 | p.P797R  | c.2390C>G | Unverified | ACC | CCA | AGC | 2 | C | G |
| TCGA-25-1326 | C13orf23   | ENST00000352251 | p.P148P  | c.444C>G  | Verified   | TAT | CCC | AAA | 3 | C | G |
| TCGA-24-1422 | C14orf181  | ENST00000328595 | p.P41R   | c.122C>G  | Unverified | TCC | CCA | CGA | 2 | C | G |
| TCGA-24-1435 | C14orf39   | ENST00000321731 | p.Q561E  | c.1681C>G | Verified   | GGA | CAG | GGT | 1 | C | G |
| TCGA-24-1104 | C14orf93   | ENST00000397379 | p.L246V  | c.736C>G  | Verified   | AAG | CTG | CCA | 1 | C | G |
| TCGA-24-1423 | C15orf29   | ENST00000256544 | p.L222V  | c.664C>G  | Verified   | CCT | CTA | GTA | 1 | C | G |
| TCGA-09-2056 | C16orf62   | ENST00000251143 | p.S98C   | c.293C>G  | Verified   | AGC | TCC | AGA | 2 | C | G |
| TCGA-25-1326 | C17orf63   | ENST00000452648 | p.P452A  | c.1354C>G | Verified   | CAA | CCC | CTG | 1 | C | G |
| TCGA-24-1845 | C18orf1    | ENST00000361205 | p.D43E   | c.129C>G  | Unverified | agt | gac | gaa | 3 | C | G |
| TCGA-24-1470 | C18orf54   | ENST00000300091 | p.P228A  | c.682C>G  | Verified   | AGT | CCT | TGC | 1 | C | G |
| TCGA-29-1763 | C19orf2    | ENST00000542441 | p.R406G  | c.1216C>G | Unverified | cct | cgc | aaa | 1 | C | G |
| TCGA-13-1510 | C1orf112   | ENST00000286031 | p.A684G  | c.2051C>G | Unverified | GAA | GCT | ATC | 2 | C | G |
| TCGA-23-2077 | C1orf141   | ENST00000371007 | p.P273A  | c.817C>G  | Verified   | ATG | CCT | ACA | 1 | C | G |
| TCGA-13-1481 | C1orf183   | ENST00000357260 | p.P93R   | c.278C>G  | Verified   | tcc | ccc | tcc | 2 | C | G |
| TCGA-13-1498 | C1orf226   | ENST00000426197 | p.L284V  | c.850C>G  | Verified   | AGC | CTG | GCT | 1 | C | G |
| TCGA-25-1313 | C1orf56    | ENST00000368926 | p.T31T   | c.93C>G   | Unverified | CCG | ACC | GAA | 3 | C | G |
| TCGA-13-0900 | C1orf95    | ENST00000366788 | p.Y48*   | c.144C>G  | Unverified | CCC | TAC | ATG | 3 | C | G |
| TCGA-13-1505 | C1QBP      | ENST00000225698 | p.A125A  | c.375C>G  | Verified   | GTT | GCC | GGG | 3 | C | G |
| TCGA-61-2113 | C21orf124  | ENST00000291565 | p.P286R  | c.857C>G  | Unverified | AGC | CCC | ATG | 2 | C | G |
| TCGA-24-2035 | C21orf91   | ENST00000284881 | p.Q134E  | c.400C>G  | Verified   | CCA | CAG | TTT | 1 | C | G |
| TCGA-25-2393 | C22orf42   | ENST00000382097 | p.A219G  | c.656C>G  | Verified   | ATG | GCA | AAG | 2 | C | G |
| TCGA-20-1685 | C2orf29    | ENST00000289382 | p.D248E  | c.744C>G  | Unverified | CCA | GAC | CCG | 3 | C | G |
| TCGA-09-2056 | C2orf53    | ENST00000335524 | p.P349A  | c.1045C>G | Unverified | GAC | CCA | GTC | 1 | C | G |
| TCGA-24-2035 | C2orf63    | ENST00000407122 | p.T156S  | c.467C>G  | Verified   | TGT | ACT | TTC | 2 | C | G |
| TCGA-24-2035 | C2orf63_EN | ENST00000407122 | p.T156S  | c.467C>G  | Verified   | TGT | ACT | TTC | 2 | C | G |
| TCGA-24-2280 | C3orf32    | ENST00000341795 | p.P16R   | c.47C>G   | Unverified | tgg | cct | cag | 2 | C | G |

|              |            |                 |          |           |            |     |     |     |   |   |   |
|--------------|------------|-----------------|----------|-----------|------------|-----|-----|-----|---|---|---|
| TCGA-29-1775 | C3orf32    | ENST00000341795 | p.S179S  | c.537C>G  | Unverified | cca | tcc | tgc | 3 | C | G |
| TCGA-24-2267 | C3orf37    | ENST00000389735 | p.P346R  | c.1037C>G | Verified   | GAA | CCT | GTG | 2 | C | G |
| TCGA-25-1326 | C3orf45    | ENST00000316436 | p.S150R  | c.450C>G  | Verified   | CTC | AGC | CAG | 3 | C | G |
| TCGA-29-1775 | C3P1       | ENST00000333905 | p.A113G  | c.338C>G  | Unverified | AGT | GCG | TCA | 2 | C | G |
| TCGA-29-1781 | C4orf27    | ENST00000393381 | p.A88G   | c.263C>G  | Unverified | CTT | GCT | GGA | 2 | C | G |
| TCGA-29-1776 | C4orf50    | ENST00000324058 | p.S260R  | c.780C>G  | Unverified | CAA | AGC | ATT | 3 | C | G |
| TCGA-29-1776 | C4orf50_EN | ENST00000531445 | p.S734R  | c.2202C>G | Unverified | CAA | AGC | ATT | 3 | C | G |
| TCGA-29-1785 | C5         | ENST00000223642 | p.Q785E  | c.2353C>G | Unverified | AAA | CAG | TTG | 1 | C | G |
| TCGA-29-1785 | C5         | ENST00000223642 | p.Q785E  | c.2353C>G | Unverified | AAA | CAG | TTG | 1 | C | G |
| TCGA-29-2427 | C5         | ENST00000223642 | p.A1252A | c.3756C>G | Verified   | ACT | GCC | TAT | 3 | C | G |
| TCGA-24-2280 | C5orf34    | ENST00000306862 | p.T87S   | c.260C>G  | Unverified | GAA | ACC | ATC | 2 | C | G |
| TCGA-24-2267 | C5orf48    | ENST00000357147 | p.P103A  | c.307C>G  | Verified   | GGC | CCA | CCA | 1 | C | G |
| TCGA-20-1685 | C6orf114   | ENST00000379278 | p.T22T   | c.66C>G   | Unverified | CAG | ACC | CAG | 3 | C | G |
| TCGA-25-2042 | C6orf138   | ENST00000339488 | p.L245V  | c.733C>G  | Unverified | ATC | CTG | ACC | 1 | C | G |
| TCGA-13-1481 | C6orf222   | ENST00000437635 | p.R202G  | c.604C>G  | Verified   | GCT | CGC | AGG | 1 | C | G |
| TCGA-24-1463 | C7orf26    | ENST00000344417 | p.L285V  | c.853C>G  | Verified   | CAC | CTC | TTG | 1 | C | G |
| TCGA-24-1103 | C7orf47    | ENST00000292330 | p.P228R  | c.683C>G  | Verified   | CCC | CCT | CTC | 2 | C | G |
| TCGA-09-2050 | C8orf31    | ENST00000395172 | p.P50P   | c.150C>G  | Verified   | TCT | CCC | TTG | 3 | C | G |
| TCGA-09-2051 | C8orf73    | ENST00000398882 | p.Q272E  | c.814C>G  | Unverified | ACA | CAG | CTG | 1 | C | G |
| TCGA-04-1342 | C9orf16    | ENST00000372994 | p.P83P   | c.249C>G  | Unverified | AGC | CCC | TAG | 3 | C | G |
| TCGA-29-1761 | C9orf43    | ENST00000374165 | p.T190T  | c.570C>G  | Unverified | CCA | ACC | CCA | 3 | C | G |
| TCGA-20-1686 | C9orf79    | ENST00000325643 | p.P664R  | c.1991C>G | Unverified | AGG | CCC | CAG | 2 | C | G |
| TCGA-61-2012 | C9orf89    | ENST00000375464 | p.L95V   | c.283C>G  | Unverified | CGC | CTG | CCC | 1 | C | G |
| TCGA-13-1488 | CACHD1     | ENST00000290039 | p.V660V  | c.1980C>G | Verified   | CAC | GTC | ACA | 3 | C | G |
| TCGA-61-1913 | CACNA1E    | ENST00000367570 | p.T49S   | c.146C>G  | Unverified | CGG | ACT | ATG | 2 | C | G |
| TCGA-61-1913 | CACNA1E_EI | ENST00000367573 | p.T49S   | c.146C>G  | Unverified | CGG | ACT | ATG | 2 | C | G |
| TCGA-13-0906 | CACNA1F    | ENST00000376265 | p.D314E  | c.942C>G  | Unverified | ttt | gac | aac | 3 | C | G |
| TCGA-29-1761 | CACNA1G    | ENST00000359106 | p.P2315A | c.6943C>G | Unverified | GAC | CCC | CCC | 1 | C | G |
| TCGA-29-1761 | CACNA1G_E  | ENST00000354983 | p.P2281A | c.6841C>G | Unverified | GAC | CCC | CCC | 1 | C | G |
| TCGA-29-1761 | CACNA1G_E  | ENST00000359106 | p.P2315A | c.6943C>G | Unverified | GAC | CCC | CCC | 1 | C | G |
| TCGA-24-2280 | CACNA1G_E  | ENST00000359106 | p.A1585G | c.4754C>G | Unverified | GCT | GCG | TCA | 2 | C | G |
| TCGA-25-1318 | CACNA1G_E  | ENST00000359106 | p.S1263C | c.3788C>G | Verified   | CAG | TCC | AGG | 2 | C | G |
| TCGA-25-1318 | CACNA1G_E  | ENST00000359106 | p.S1263C | c.3788C>G | Verified   | CAG | TCC | AGG | 2 | C | G |
| TCGA-24-1850 | CACNA1S    | ENST00000362061 | p.R1229G | c.3685C>G | Unverified | GCC | CGC | ATC | 1 | C | G |

|              |            |                 |          |           |            |     |     |     |   |   |   |
|--------------|------------|-----------------|----------|-----------|------------|-----|-----|-----|---|---|---|
| TCGA-61-2113 | CAMSAP1    | ENST00000389532 | p.S835R  | c.2505C>G | Unverified | ACC | AGC | AGC | 3 | C | G |
| TCGA-61-2009 | CAPN13     | ENST00000295055 | p.F130L  | c.390C>G  | Verified   | CGG | TTC | TGG | 3 | C | G |
| TCGA-61-1914 | CARM1      | ENST00000327064 | p.I210M  | c.630C>G  | Unverified | AAA | ATC | TAC | 3 | C | G |
| TCGA-61-1914 | CASC1      | ENST00000320267 | p.Q190E  | c.568C>G  | Unverified | AAA | CAA | GCT | 1 | C | G |
| TCGA-61-1914 | CASC1_ENST | ENST00000354189 | p.Q254E  | c.760C>G  | Unverified | AAA | CAA | GCT | 1 | C | G |
| TCGA-13-0883 | CASKIN1    | ENST00000343516 | p.N188K  | c.564C>G  | Unverified | CCC | AAC | GGC | 3 | C | G |
| TCGA-13-0883 | CASKIN1_EN | ENST00000382453 | p.N17K   | c.51C>G   | Unverified | CCC | AAC | GGC | 3 | C | G |
| TCGA-09-2056 | CASP8AP2   | ENST00000237177 | p.S903C  | c.2708C>G | Verified   | CAG | TCT | GAT | 2 | C | G |
| TCGA-61-2113 | CATSPER3   | ENST00000282611 | p.S49R   | c.147C>G  | Verified   | ATG | AGC | CGT | 3 | C | G |
| TCGA-24-1423 | CBLB       | ENST00000264122 | p.D759E  | c.2277C>G | Verified   | CCT | GAC | TTA | 3 | C | G |
| TCGA-24-1469 | CCDC138    | ENST00000295124 | p.H369D  | c.1105C>G | Unverified | CAT | CAT | CTT | 1 | C | G |
| TCGA-24-1104 | CCDC15     | ENST00000344762 | p.G529G  | c.1587C>G | Verified   | CAA | GGC | CAG | 3 | C | G |
| TCGA-24-1846 | CCDC157    | ENST00000338306 | p.L242L  | c.726C>G  | Unverified | GCC | CTC | AGG | 3 | C | G |
| TCGA-24-1846 | CCDC157_EI | ENST00000405659 | p.L293L  | c.879C>G  | Unverified | GCC | CTC | AGG | 3 | C | G |
| TCGA-24-1847 | CCDC165    | ENST00000359865 | p.T694S  | c.2081C>G | Unverified | AAC | ACC | CTC | 2 | C | G |
| TCGA-24-1423 | CCDC19     | ENST00000368099 | p.S105R  | c.315C>G  | Verified   | ATC | AGC | CCT | 3 | C | G |
| TCGA-24-1844 | CCDC41     | ENST00000339839 | p.P112A  | c.334C>G  | Unverified | ACT | CCA | CAA | 1 | C | G |
| TCGA-20-0990 | CCDC65     | ENST00000320516 | p.P482A  | c.1444C>G | Verified   | CAT | CCA | ACC | 1 | C | G |
| TCGA-23-1117 | CCDC69     | ENST00000355417 | p.R55G   | c.163C>G  | Verified   | GAG | CGG | CAC | 1 | C | G |
| TCGA-23-1117 | CCDC69     | ENST00000355417 | p.R55G   | c.163C>G  | Verified   | GAG | CGG | CAC | 1 | C | G |
| TCGA-13-0924 | CCDC88B    | ENST00000356786 | p.D1279E | c.3837C>G | Verified   | CTG | GAC | CAG | 3 | C | G |
| TCGA-23-1124 | CCDC88C    | ENST00000389857 | p.L803V  | c.2407C>G | Verified   | GAC | CTG | GAG | 1 | C | G |
| TCGA-10-0930 | CCR8       | ENST00000326306 | p.N232K  | c.696C>G  | Verified   | cac | aac | aag | 3 | C | G |
| TCGA-10-0930 | CCR8       | ENST00000326306 | p.N232K  | c.696C>G  | Verified   | cac | aac | aag | 3 | C | G |
| TCGA-13-0923 | CCT3       | ENST00000295688 | p.L245V  | c.733C>G  | Verified   | TCT | CTG | GAA | 1 | C | G |
| TCGA-61-2113 | CCT8L2     | ENST00000359963 | p.S262C  | c.785C>G  | Unverified | CTT | TCT | AGT | 2 | C | G |
| TCGA-09-2050 | CD22       | ENST00000085219 | p.N771K  | c.2313C>G | Verified   | ATG | AAC | ATA | 3 | C | G |
| TCGA-24-1469 | CD300LB    | ENST00000392621 | p.C5W    | c.15C>G   | Verified   | AGG | TGC | AAG | 3 | C | G |
| TCGA-29-1691 | CDC16      | ENST00000360383 | p.L287V  | c.859C>G  | Unverified | TAT | CTT | TCT | 1 | C | G |
| TCGA-13-0884 | CDC25B     | NM_021874.2     | p.A420G  | c.1259C>G | Verified   | aag | gcc | ttc | 2 | C | G |
| TCGA-61-1740 | CDC5L      | ENST00000371477 | p.L682V  | c.2044C>G | Unverified | aat | ctg | gct | 1 | C | G |
| TCGA-23-1118 | CDCP1      | ENST00000296129 | p.P716A  | c.2146C>G | Verified   | ATG | CCG | AGG | 1 | C | G |
| TCGA-61-1899 | CDH10      | ENST00000264463 | p.Q538E  | c.1612C>G | Unverified | GTA | CAG | GAT | 1 | C | G |
| TCGA-61-2009 | CDH11      | ENST00000268603 | p.P473R  | c.1418C>G | Verified   | GTC | CCA | GTG | 2 | C | G |

|              |           |                 |          |           |            |     |     |     |   |   |   |
|--------------|-----------|-----------------|----------|-----------|------------|-----|-----|-----|---|---|---|
| TCGA-23-1124 | CDH16     | ENST00000299752 | p.P395R  | c.1184C>G | Verified   | GAC | CCC | ACT | 2 | C | G |
| TCGA-23-1029 | CDH2      | ENST00000269141 | p.F894L  | c.2682C>G | Unverified | CGG | TTC | AAG | 3 | C | G |
| TCGA-04-1367 | CDHR3     | ENST00000317716 | p.Y440*  | c.1320C>G | Verified   | CCT | TAC | TAT | 3 | C | G |
| TCGA-29-1696 | CDK12     | NM_016507       | p.A1174G | c.3521C>G | Unverified | atg | gcc | cca | 2 | C | G |
| TCGA-29-1696 | CDK12     | NM_016507       | p.A1174G | c.3521C>G | Unverified | atg | gcc | cca | 2 | C | G |
| TCGA-13-1510 | CDK17     | ENST00000261211 | p.R312G  | c.934C>G  | Verified   | CAT | CGA | GAC | 1 | C | G |
| TCGA-04-1362 | CDKL4     | SU_CDKL4        | p.I103M  | c.309C>G  | Verified   | gtg | atc | aaa | 3 | C | G |
| TCGA-61-2102 | CDKN2C    | ENST00000262662 | p.A41G   | c.122C>G  | Verified   | act | gcg | ctg | 2 | C | G |
| TCGA-13-0924 | CDRT1_ENS | ENST00000395906 | p.H494Q  | c.1482C>G | Verified   | GGT | CAC | CAG | 3 | C | G |
| TCGA-13-1496 | CDS1      | ENST00000295887 | p.L235V  | c.703C>G  | Verified   | AAT | CTG | TTT | 1 | C | G |
| TCGA-13-0760 | CELA2B    | ENST00000375910 | p.H56Q   | c.168C>G  | Verified   | TAC | CAC | ACC | 3 | C | G |
| TCGA-24-1604 | CENPF     | ENST00000366955 | p.Q1989E | c.5965C>G | Verified   | ACA | CAA | GAG | 1 | C | G |
| TCGA-13-0904 | CEP192    | ENST00000325971 | p.T636R  | c.1907C>G | Verified   | AGC | ACA | GTT | 2 | C | G |
| TCGA-13-1499 | CEP250    | ENST00000397527 | p.T2299T | c.6897C>G | Verified   | AGT | ACC | TTG | 3 | C | G |
| TCGA-13-0913 | CEP290    | ENST00000552810 | p.A1920G | c.5759C>G | Verified   | CAA | GCC | AAA | 2 | C | G |
| TCGA-13-0887 | CEP350    | ENST00000367607 | p.P2207R | c.6620C>G | Verified   | TCT | CCA | GTT | 2 | C | G |
| TCGA-23-1116 | CHCHD3    | ENST00000262570 | p.Q82E   | c.244C>G  | Unverified | GAT | CAG | AAA | 1 | C | G |
| TCGA-61-1900 | CHD3      | ENST00000330494 | p.P1825P | c.5475C>G | Unverified | CAC | CCC | GCC | 3 | C | G |
| TCGA-13-0906 | CHD4_ENST | ENST00000309577 | p.R645G  | c.1933C>G | Unverified | TGG | CGG | GAC | 1 | C | G |
| TCGA-24-1843 | CHD9      | NM_025134.3     | p.I742M  | c.2226C>G | Unverified | agg | atc | cag | 3 | C | G |
| TCGA-09-0369 | CHEK2     | ENST00000328354 | p.R519G  | c.1555C>G | Unverified | agt | cga | aag | 1 | C | G |
| TCGA-09-0369 | CHEK2     | ENST00000328354 | p.R519G  | c.1555C>G | Unverified | agt | cga | aag | 1 | C | G |
| TCGA-13-0760 | CHEK2     | ENST00000328354 | p.R519G  | c.1555C>G | Unverified | agt | cga | aag | 1 | C | G |
| TCGA-13-0762 | CHEK2     | ENST00000328354 | p.R519G  | c.1555C>G | Unverified | agt | cga | aag | 1 | C | G |
| TCGA-13-0762 | CHEK2     | ENST00000328354 | p.R519G  | c.1555C>G | Unverified | agt | cga | aag | 1 | C | G |
| TCGA-04-1652 | CHIA      | ENST00000430615 | p.G227G  | c.681C>G  | Unverified | GTT | GGC | TAT | 3 | C | G |
| TCGA-04-1652 | CHIA      | ENST00000430615 | p.G227G  | c.681C>G  | Unverified | GTT | GGC | TAT | 3 | C | G |
| TCGA-04-1652 | CHIA_ENST | ENST00000369740 | p.G335G  | c.1005C>G | Unverified | GTT | GGC | TAT | 3 | C | G |
| TCGA-04-1652 | CHIA_ENST | ENST00000369740 | p.G335G  | c.1005C>G | Unverified | GTT | GGC | TAT | 3 | C | G |
| TCGA-36-1577 | CHML      | ENST00000366553 | p.S514C  | c.1541C>G | Verified   | TCA | TCT | TCT | 2 | C | G |
| TCGA-24-1469 | CHRM2     | ENST00000320658 | p.T15R   | c.44C>G   | Verified   | CTT | ACA | AGT | 2 | C | G |
| TCGA-23-1114 | CHST14    | ENST00000306243 | p.R231G  | c.691C>G  | Unverified | ATC | CGA | GAG | 1 | C | G |
| TCGA-09-2056 | CHST2     | ENST00000309575 | p.F51L   | c.153C>G  | Verified   | GTG | TTC | CGT | 3 | C | G |
| TCGA-13-0900 | CIDEC     | ENST00000336832 | p.S172C  | c.515C>G  | Unverified | CTT | TCC | TAT | 2 | C | G |



|              |                |                 |          |           |            |     |     |     |   |   |   |
|--------------|----------------|-----------------|----------|-----------|------------|-----|-----|-----|---|---|---|
| TCGA-24-1431 | CILP2          | ENST00000291495 | p.D202E  | c.606C>G  | Verified   | CTT | GAC | ACC | 3 | C | G |
| TCGA-13-0900 | CIT            | SU_CRIK         | p.D772E  | c.2316C>G | Verified   | ttg | gac | aat | 3 | C | G |
| TCGA-24-1845 | CIT            | SU_CRIK         | p.I1765M | c.5295C>G | Unverified | tgt | atc | cac | 3 | C | G |
| TCGA-24-1845 | CIT_ENST000000 | ENST00000261833 | p.I1737M | c.5211C>G | Unverified | TGT | ATC | CAC | 3 | C | G |
| TCGA-24-1845 | CIT_ENST000000 | ENST00000392521 | p.I1779M | c.5337C>G | Unverified | TGT | ATC | CAC | 3 | C | G |
| TCGA-61-1740 | CLASRP         | ENST00000221455 | p.P574R  | c.1721C>G | Unverified | ACG | CCT | CAG | 2 | C | G |
| TCGA-24-1849 | CLCN1          | ENST00000343257 | p.P408A  | c.1222C>G | Unverified | CCA | CCA | GGA | 1 | C | G |
| TCGA-23-1031 | CLDN6          | ENST00000396925 | p.P135A  | c.403C>G  | Unverified | ATC | CCC | GTG | 1 | C | G |
| TCGA-25-1326 | CLDND1         | ENST00000341181 | p.L198L  | c.594C>G  | Verified   | CTA | CTC | CAC | 3 | C | G |
| TCGA-25-2398 | CLEC14A        | ENST00000342213 | p.D265E  | c.795C>G  | Unverified | GAC | GAC | TTG | 3 | C | G |
| TCGA-13-0762 | CLEC4C         | ENST00000360345 | p.S49R   | c.147C>G  | Verified   | TAT | AGC | AAA | 3 | C | G |
| TCGA-13-0762 | CLEC4C         | ENST00000360345 | p.S49R   | c.147C>G  | Verified   | TAT | AGC | AAA | 3 | C | G |
| TCGA-09-0369 | CLGN           | ENST00000325617 | p.P182R  | c.545C>G  | Verified   | GGA | CCA | GAT | 2 | C | G |
| TCGA-09-0369 | CLGN           | ENST00000325617 | p.P182R  | c.545C>G  | Verified   | GGA | CCA | GAT | 2 | C | G |
| TCGA-13-1499 | CLSPN          | ENST00000318121 | p.L456V  | c.1366C>G | Verified   | gcc | ctg | gag | 1 | C | G |
| TCGA-61-2008 | CLUL1          | ENST00000338387 | p.L434L  | c.1302C>G | Verified   | ACA | CTC | AAG | 3 | C | G |
| TCGA-13-0884 | CLVS1          | ENST00000325897 | p.Q55E   | c.163C>G  | Verified   | CAG | CAA | GTC | 1 | C | G |
| TCGA-13-0923 | CMKLR1         | ENST00000312143 | p.A110A  | c.330C>G  | Verified   | ACA | GCC | ATG | 3 | C | G |
| TCGA-24-2289 | CMTM4          | ENST00000330687 | p.L132V  | c.394C>G  | Unverified | ttc | ctt | ttc | 1 | C | G |
| TCGA-13-0900 | CNGA1          | ENST00000358519 | p.S116*  | c.347C>G  | Verified   | AAG | TCA | GAT | 2 | C | G |
| TCGA-29-1777 | CNNM3          | ENST00000305510 | p.G694G  | c.2082C>G | Unverified | CCC | GGC | GTC | 3 | C | G |
| TCGA-04-1356 | CNOT1          | ENST00000317147 | p.T1510S | c.4529C>G | Verified   | AAG | ACT | GCA | 2 | C | G |
| TCGA-61-1907 | CNPY3          | ENST00000372836 | p.D81E   | c.243C>G  | Unverified | CTG | GAC | CAG | 3 | C | G |
| TCGA-24-1464 | CNTN5          | ENST00000528682 | p.L539V  | c.1615C>G | Verified   | atc | cta | aat | 1 | C | G |
| TCGA-61-2094 | CNTNAP1        | ENST00000264638 | p.L399V  | c.1195C>G | Unverified | CTC | CTT | TTC | 1 | C | G |
| TCGA-13-1510 | CNTNAP4        | ENST00000339740 | p.S690C  | c.2069C>G | Unverified | GGT | TCT | TCG | 2 | C | G |
| TCGA-13-1510 | CNTNAP4_E      | ENST00000307431 | p.S714C  | c.2141C>G | Unverified | GGT | TCT | TCG | 2 | C | G |
| TCGA-61-1998 | COBL           | ENST00000265136 | p.R353R  | c.1059C>G | Unverified | AAC | CGC | ACT | 3 | C | G |
| TCGA-24-2267 | COBLL1         | ENST00000342193 | p.S1077C | c.3230C>G | Verified   | GTG | TCT | GAT | 2 | C | G |
| TCGA-13-1481 | COG1           | ENST00000299886 | p.D384E  | c.1152C>G | Verified   | CGG | GAC | GCC | 3 | C | G |
| TCGA-24-1563 | COL12A1        | ENST00000322507 | p.S554*  | c.1661C>G | Verified   | TCA | TCA | GAT | 2 | C | G |
| TCGA-10-0930 | COL12A1        | ENST00000322507 | p.N1849K | c.5547C>G | Verified   | AGG | AAC | CTG | 3 | C | G |
| TCGA-10-0930 | COL12A1        | ENST00000322507 | p.N1849K | c.5547C>G | Verified   | AGG | AAC | CTG | 3 | C | G |
| TCGA-20-1686 | COL4A4         | ENST00000396625 | p.P1025R | c.3074C>G | Unverified | GGG | CCT | CCT | 2 | C | G |

|              |            |                 |          |           |            |     |     |     |   |   |   |
|--------------|------------|-----------------|----------|-----------|------------|-----|-----|-----|---|---|---|
| TCGA-24-1845 | COL5A1     | ENST00000371817 | p.L1576V | c.4726C>G | Unverified | CCC | CTG | CCA | 1 | C | G |
| TCGA-13-0793 | COPB1      | ENST00000249923 | p.T468T  | c.1404C>G | Verified   | AGT | ACC | AAG | 3 | C | G |
| TCGA-23-1118 | CORIN      | ENST00000273857 | p.P467R  | c.1400C>G | Verified   | TTG | CCC | TAC | 2 | C | G |
| TCGA-61-2012 | CORO2B     | ENST00000566799 | p.C335W  | c.1005C>G | Verified   | GCC | TGC | GAG | 3 | C | G |
| TCGA-13-0886 | CPA2       | ENST00000222481 | p.P398P  | c.1194C>G | Verified   | CTG | CCC | ACA | 3 | C | G |
| TCGA-04-1347 | CPNE6      | ENST00000397016 | p.S477C  | c.1430C>G | Verified   | TTC | TCT | GAC | 2 | C | G |
| TCGA-04-1655 | CPVL       | ENST00000396276 | p.T321R  | c.962C>G  | Unverified | TGC | ACG | GAA | 2 | C | G |
| TCGA-23-1031 | CPVL       | ENST00000396276 | p.T396R  | c.1187C>G | Verified   | CTG | ACA | GAG | 2 | C | G |
| TCGA-29-1705 | CRADD      | ENST00000332896 | p.L30L   | c.90C>G   | Unverified | tac | ctc | tac | 3 | C | G |
| TCGA-20-1686 | CRB1       | ENST00000367400 | p.R1286G | c.3856C>G | Unverified | TGC | CGG | CCA | 1 | C | G |
| TCGA-13-0916 | CRB1       | ENST00000367400 | p.A595G  | c.1784C>G | Verified   | AAA | GCT | CCT | 2 | C | G |
| TCGA-61-1900 | CREB3L2    | ENST00000330387 | p.L57L   | c.171C>G  | Unverified | ttc | ctc | tca | 3 | C | G |
| TCGA-29-1705 | CREBBP     | ENST00000262367 | p.N390K  | c.1170C>G | Unverified | AAA | AAC | GTT | 3 | C | G |
| TCGA-61-1900 | CSF2RB     | ENST00000403662 | p.R799G  | c.2395C>G | Unverified | GAA | CGC | CCG | 1 | C | G |
| TCGA-29-1696 | CSMD1_ENS  | ENST00000537824 | p.L544L  | c.1632C>G | Unverified | TTC | CTC | CAT | 3 | C | G |
| TCGA-29-1696 | CSMD1_ENS  | ENST00000537824 | p.L544L  | c.1632C>G | Unverified | TTC | CTC | CAT | 3 | C | G |
| TCGA-30-1718 | CSMD2      | ENST00000241312 | p.L1520V | c.4558C>G | Unverified | CAG | CTC | CCA | 1 | C | G |
| TCGA-30-1718 | CSMD2_ENS  | ENST00000373381 | p.L1560V | c.4678C>G | Unverified | CAG | CTC | CCA | 1 | C | G |
| TCGA-29-1701 | CSMD3      | ENST00000297405 | p.T643R  | c.1928C>G | Unverified | caa | acg | gac | 2 | C | G |
| TCGA-29-2427 | CSMD3      | ENST00000297405 | p.I2122M | c.6366C>G | Verified   | gtg | atc | ctc | 3 | C | G |
| TCGA-29-1701 | CSMD3_ENS  | ENST00000343508 | p.T603R  | c.1808C>G | Unverified | CAA | ACG | GAC | 2 | C | G |
| TCGA-25-2393 | CSN3       | ENST00000304954 | p.P52A   | c.154C>G  | Verified   | GTG | CCA | AAT | 1 | C | G |
| TCGA-61-1900 | CSRNP1     | ENST00000273153 | p.L583V  | c.1747C>G | Unverified | TCT | CTA | ATG | 1 | C | G |
| TCGA-29-1695 | CSTF2T     | ENST00000331173 | p.P225R  | c.674C>G  | Unverified | GGA | CCT | AAT | 2 | C | G |
| TCGA-61-1900 | CTBP2      | ENST00000309035 | p.A97G   | c.290C>G  | Unverified | CAG | GCA | GTG | 2 | C | G |
| TCGA-24-1563 | CUX2       | ENST00000261726 | p.Q386E  | c.1156C>G | Verified   | CCC | CAG | GGC | 1 | C | G |
| TCGA-04-1638 | CXCL16     | ENST00000293778 | p.H192D  | c.574C>G  | Unverified | ATT | CAC | ACT | 1 | C | G |
| TCGA-04-1638 | CXCL16_ENS | ENST00000293778 | p.H192D  | c.574C>G  | Unverified | ATT | CAC | ACT | 1 | C | G |
| TCGA-29-1691 | CXCR5      | ENST00000292174 | p.T203T  | c.609C>G  | Unverified | tgc | acc | ttc | 3 | C | G |
| TCGA-23-1021 | CXXC1      | ENST00000285106 | p.F219L  | c.657C>G  | Verified   | TAC | TTC | CCT | 3 | C | G |
| TCGA-61-1910 | CYC1       | ENST00000318911 | p.P247A  | c.739C>G  | Unverified | CCT | CCC | ATC | 1 | C | G |
| TCGA-13-1488 | CYFIP2_ENS | ENST00000442283 | p.T896S  | c.2687C>G | Verified   | TTC | ACC | CAA | 2 | C | G |
| TCGA-29-1777 | CYP11B1    | ENST00000292427 | p.P14R   | c.41C>G   | Unverified | GTG | CCC | TGG | 2 | C | G |
| TCGA-24-1846 | CYP11B2    | ENST00000323110 | p.Q54E   | c.160C>G  | Unverified | CTG | CAG | ATC | 1 | C | G |

|              |            |                 |          |           |            |     |     |     |   |   |   |
|--------------|------------|-----------------|----------|-----------|------------|-----|-----|-----|---|---|---|
| TCGA-29-1764 | CYP4A11    | ENST00000310638 | p.D69E   | c.207C>G  | Unverified | CAG | GAC | CAG | 3 | C | G |
| TCGA-20-1683 | CYP4F2     | ENST00000221700 | p.I271M  | c.813C>G  | Unverified | GTC | ATC | CAG | 3 | C | G |
| TCGA-23-2078 | CYTH4      | ENST00000248901 | p.L253V  | c.757C>G  | Verified   | GAC | CTC | ACT | 1 | C | G |
| TCGA-25-2401 | DAAM1      | ENST00000351081 | p.A832G  | c.2495C>G | Verified   | aat | gca | tat | 2 | C | G |
| TCGA-24-1849 | DAB2IP     | ENST00000309989 | p.P409A  | c.1225C>G | Unverified | TCG | CCC | TCA | 1 | C | G |
| TCGA-24-1849 | DAB2IP_ENS | ENST00000259371 | p.P505A  | c.1513C>G | Unverified | TCG | CCC | TCA | 1 | C | G |
| TCGA-24-2289 | DARS2      | ENST00000361951 | p.L169V  | c.505C>G  | Unverified | GCT | CTT | CGG | 1 | C | G |
| TCGA-29-1776 | DBC1       | ENST00000373969 | p.S689C  | c.2066C>G | Unverified | TCC | TCT | TCG | 2 | C | G |
| TCGA-13-0791 | DCC        | ENST00000442544 | p.Q460E  | c.1378C>G | Verified   | ATT | CAA | ACT | 1 | C | G |
| TCGA-13-0761 | DCTN1      | ENST00000361874 | p.L705V  | c.2113C>G | Verified   | GAA | CTG | CTG | 1 | C | G |
| TCGA-13-0761 | DCTN1      | ENST00000361874 | p.L705V  | c.2113C>G | Verified   | GAA | CTG | CTG | 1 | C | G |
| TCGA-09-2049 | DCTN1      | ENST00000361874 | p.S892*  | c.2675C>G | Verified   | CAG | TCA | TGC | 2 | C | G |
| TCGA-13-1497 | DCTN1      | ENST00000361874 | p.S651R  | c.1953C>G | Verified   | CTC | AGC | TTT | 3 | C | G |
| TCGA-30-1718 | DDI2       | ENST00000480945 | p.A226G  | c.677C>G  | Unverified | GAG | GCT | CCG | 2 | C | G |
| TCGA-61-1906 | DDX11_ENS  | ENST00000407793 | p.P922A  | c.2764C>G | Unverified | TGC | CCG | CTG | 1 | C | G |
| TCGA-61-1906 | DDX11_ENS  | ENST00000407793 | p.P922A  | c.2764C>G | Unverified | TGC | CCG | CTG | 1 | C | G |
| TCGA-23-1110 | DDX58      | ENST00000379883 | p.L391V  | c.1171C>G | Verified   | tat | cta | gat | 1 | C | G |
| TCGA-13-0886 | DFNB31     | ENST00000362057 | p.R423G  | c.1267C>G | Verified   | ACA | CGA | GTG | 1 | C | G |
| TCGA-09-2049 | DFNB31     | ENST00000362057 | p.S160W  | c.479C>G  | Verified   | GGC | TCG | GAG | 2 | C | G |
| TCGA-24-1843 | DGKH       | ENST00000337343 | p.I935M  | c.2805C>G | Unverified | att | atc | aaa | 3 | C | G |
| TCGA-24-2024 | DIDO1      | ENST00000395343 | p.P2059A | c.6175C>G | Unverified | GGC | CCC | GAG | 1 | C | G |
| TCGA-23-1110 | DIP2C      | ENST00000280886 | p.P480P  | c.1440C>G | Verified   | CCG | CCC | CGA | 3 | C | G |
| TCGA-23-1110 | DKK2       | ENST00000285311 | p.R112G  | c.334C>G  | Verified   | cac | cga | gat | 1 | C | G |
| TCGA-13-0920 | DLAT       | ENST00000280346 | p.P187R  | c.560C>G  | Unverified | gca | cct | acc | 2 | C | G |
| TCGA-25-1326 | DLG1       | ENST00000346964 | p.P464R  | c.1391C>G | Verified   | GAA | CCT | AGA | 2 | C | G |
| TCGA-13-1481 | DLGAP3     | ENST00000373347 | p.I883M  | c.2649C>G | Unverified | TCC | ATC | GAG | 3 | C | G |
| TCGA-24-2289 | DLGAP5     | ENST00000247191 | p.L466V  | c.1396C>G | Unverified | GAT | CTT | ATT | 1 | C | G |
| TCGA-25-2401 | DLX5       | ENST00000222598 | p.S40C   | c.119C>G  | Verified   | GAG | TCT | TCA | 2 | C | G |
| TCGA-13-1509 | DMRT2_ENS  | ENST00000302441 | p.P295A  | c.883C>G  | Verified   | CCA | CCA | AGC | 1 | C | G |
| TCGA-04-1347 | DMXL1      | ENST00000311085 | p.S1218C | c.3653C>G | Verified   | GTT | TCT | TTA | 2 | C | G |
| TCGA-24-1431 | DNA2L      | ENST00000358410 | p.Q203E  | c.607C>G  | Unverified | AGT | CAA | GAT | 1 | C | G |
| TCGA-25-2398 | DNAH17     | ENST00000300671 | p.A3207G | c.9620C>G | Unverified | GAG | GCC | TGC | 2 | C | G |
| TCGA-04-1343 | DNAH2      | ENST00000389173 | p.L2373V | c.7117C>G | Verified   | AAG | CTC | CCT | 1 | C | G |
| TCGA-13-0885 | DNAH2      | ENST00000389173 | p.Q294E  | c.880C>G  | Verified   | AAG | CAG | CTG | 1 | C | G |

|              |           |                 |          |            |            |     |     |     |   |   |   |
|--------------|-----------|-----------------|----------|------------|------------|-----|-----|-----|---|---|---|
| TCGA-13-1507 | DNAH2     | ENST00000389173 | p.L640L  | c.1920C>G  | Verified   | ATT | CTC | TTT | 3 | C | G |
| TCGA-24-1846 | DNAH5     | ENST00000265104 | p.S1618* | c.4853C>G  | Unverified | AAC | TCA | ACA | 2 | C | G |
| TCGA-13-0920 | DNAJB7    | ENST00000307221 | p.H110Q  | c.330C>G   | Verified   | ttt | cac | ttc | 3 | C | G |
| TCGA-25-1326 | DNAJC7    | NM_003315.1     | p.L208V  | c.622C>G   | Verified   | ggt | ctt | tgc | 1 | C | G |
| TCGA-25-2393 | DNHD1     | ENST00000254579 | p.L4528V | c.13582C>G | Verified   | GCT | CTC | TGG | 1 | C | G |
| TCGA-29-1781 | DNM2      | ENST00000359692 | p.S503R  | c.1509C>G  | Unverified | AGG | AGC | ACG | 3 | C | G |
| TCGA-29-1781 | DNM2_ENST | ENST00000389253 | p.S503R  | c.1509C>G  | Unverified | AGG | AGC | ACG | 3 | C | G |
| TCGA-04-1530 | DNMT3B    | ENST00000328111 | p.A241A  | c.723C>G   | Unverified | ccc | gcc | atg | 3 | C | G |
| TCGA-29-1784 | DOCK4_ENS | ENST00000437633 | p.I862M  | c.2586C>G  | Unverified | CTT | ATC | AAG | 3 | C | G |
| TCGA-29-1705 | DPP10     | ENST00000310323 | p.P545P  | c.1635C>G  | Unverified | CTT | CCC | AAA | 3 | C | G |
| TCGA-29-1705 | DPP10_ENS | ENST00000410059 | p.P552P  | c.1656C>G  | Unverified | CTT | CCC | AAA | 3 | C | G |
| TCGA-61-2094 | DPY19L2   | ENST00000324472 | p.L42V   | c.124C>G   | Unverified | GCC | CTA | GGC | 1 | C | G |
| TCGA-24-1604 | DPY19L3   | ENST00000342179 | p.L532V  | c.1594C>G  | Verified   | ATA | CTG | CTG | 1 | C | G |
| TCGA-25-2392 | DPY19L3   | ENST00000342179 | p.L561V  | c.1681C>G  | Verified   | GAG | CTG | ATG | 1 | C | G |
| TCGA-61-2095 | DPYSL3    | ENST00000398514 | p.Q340E  | c.1018C>G  | Unverified | GCC | CAG | AAA | 1 | C | G |
| TCGA-20-0990 | DPYSL5    | ENST00000288699 | p.H433Q  | c.1299C>G  | Verified   | TGC | CAC | GGC | 3 | C | G |
| TCGA-29-1766 | DTNA_ENST | ENST00000269190 | p.T179R  | c.536C>G   | Unverified | CCC | ACG | GCA | 2 | C | G |
| TCGA-29-1766 | DTNA_ENST | ENST00000315456 | p.T179R  | c.536C>G   | Unverified | CCC | ACG | GCA | 2 | C | G |
| TCGA-29-1766 | DTNA_ENST | ENST00000444659 | p.T179R  | c.536C>G   | Unverified | CCC | ACG | GCA | 2 | C | G |
| TCGA-13-0919 | DUOX1     | ENST00000389037 | p.R76G   | c.226C>G   | Unverified | CCC | CGA | GAC | 1 | C | G |
| TCGA-04-1367 | DUOX1     | ENST00000389037 | p.L1117L | c.3351C>G  | Verified   | TTC | CTC | AAC | 3 | C | G |
| TCGA-13-0923 | DYNC1H1   | ENST00000360184 | p.L3649V | c.10945C>G | Verified   | GTG | CTG | AAC | 1 | C | G |
| TCGA-61-1906 | ECM2      | ENST00000344604 | p.A530A  | c.1590C>G  | Unverified | tta | gcc | tgg | 3 | C | G |
| TCGA-61-1906 | ECM2      | ENST00000344604 | p.A530A  | c.1590C>G  | Unverified | tta | gcc | tgg | 3 | C | G |
| TCGA-61-1906 | ECM2_ENST | ENST00000444490 | p.A508A  | c.1524C>G  | Unverified | TTA | GCC | TGG | 3 | C | G |
| TCGA-61-1906 | ECM2_ENST | ENST00000444490 | p.A508A  | c.1524C>G  | Unverified | TTA | GCC | TGG | 3 | C | G |
| TCGA-29-1775 | ECT2      | ENST00000232458 | p.P565A  | c.1693C>G  | Unverified | cga | cca | gta | 1 | C | G |
| TCGA-20-1685 | EEA1      | ENST00000322349 | p.A502G  | c.1505C>G  | Unverified | ACG | GCA | AAA | 2 | C | G |
| TCGA-23-1032 | EFCAB6    | ENST00000262726 | p.S853C  | c.2558C>G  | Verified   | TTG | TCT | AAG | 2 | C | G |
| TCGA-13-0919 | EGFR      | ENST00000275493 | p.P772R  | c.2315C>G  | Unverified | AAC | CCC | CAC | 2 | C | G |
| TCGA-24-1844 | EGR1_ENST | ENST00000239938 | p.H25D   | c.73C>G    | Unverified | CCT | CAC | TCG | 1 | C | G |
| TCGA-25-1313 | EGR2      | ENST00000242480 | p.L219L  | c.657C>G   | Verified   | GGT | CTC | TTC | 3 | C | G |
| TCGA-24-1463 | EIF2AK2   | ENST00000233057 | p.A2G    | c.5C>G     | Verified   | atg | gct | ggt | 2 | C | G |
| TCGA-13-1501 | EIF2B3    | ENST00000360403 | p.V340V  | c.1020C>G  | Verified   | CCA | GTC | CAT | 3 | C | G |

|              |            |                 |          |           |            |     |     |     |   |   |   |
|--------------|------------|-----------------|----------|-----------|------------|-----|-----|-----|---|---|---|
| TCGA-13-1501 | EIF2B3     | ENST00000360403 | p.V340V  | c.1020C>G | Verified   | CCA | GTC | CAT | 3 | C | G |
| TCGA-24-1845 | EIF3L      | ENST00000412331 | p.L457V  | c.1369C>G | Unverified | CAG | CTT | TCA | 1 | C | G |
| TCGA-04-1361 | EIF3L      | ENST00000412331 | p.S217C  | c.650C>G  | Verified   | CGT | TCC | AAT | 2 | C | G |
| TCGA-04-1361 | EIF3L      | ENST00000412331 | p.S217C  | c.650C>G  | Verified   | CGT | TCC | AAT | 2 | C | G |
| TCGA-24-2280 | EIF4G3     | ENST00000264211 | p.Q1166E | c.3496C>G | Unverified | TCT | CAA | GAA | 1 | C | G |
| TCGA-24-0979 | ELF1       | NM_172373.2     | p.P225A  | c.673C>G  | Verified   | tgt | cct | aaa | 1 | C | G |
| TCGA-13-0795 | ELK3       | ENST00000228741 | p.P95A   | c.283C>G  | Verified   | gat | cct | cac | 1 | C | G |
| TCGA-61-1740 | ELMOD3     | ENST00000315658 | p.S7C    | c.20C>G   | Unverified | TGC | TCT | TTC | 2 | C | G |
| TCGA-13-0795 | ELMOD3     | ENST00000315658 | p.S166R  | c.498C>G  | Verified   | GAT | AGC | CAA | 3 | C | G |
| TCGA-61-1740 | ELMOD3_EM  | ENST00000409890 | p.S7C    | c.20C>G   | Unverified | TGC | TCT | TTC | 2 | C | G |
| TCGA-29-1698 | EMID2      | ENST00000397927 | p.G265G  | c.795C>G  | Unverified | CCA | GGC | CCC | 3 | C | G |
| TCGA-29-1691 | EMP2       | ENST00000359543 | p.R166R  | c.498C>G  | Unverified | AAG | CGC | AAA | 3 | C | G |
| TCGA-13-0795 | ENAM       | ENST00000396073 | p.Q942E  | c.2824C>G | Verified   | AGC | CAA | AAC | 1 | C | G |
| TCGA-04-1331 | ENSG00000: | ENST00000315797 | p.S54C   | c.161C>G  | Verified   | TCC | TCC | TCT | 2 | C | G |
| TCGA-04-1331 | ENSG00000: | ENST00000398226 | p.G189G  | c.567C>G  | Verified   | TGA | GGC | TAA | 3 | C | G |
| TCGA-29-1768 | EPB41_ENS1 | ENST00000343067 | p.L82V   | c.244C>G  | Unverified | CGA | CTA | TTC | 1 | C | G |
| TCGA-23-1031 | EPB42      | ENST00000300215 | p.A502A  | c.1506C>G | Verified   | ACT | GCC | AGT | 3 | C | G |
| TCGA-24-2280 | EPS8L3     | ENST00000369805 | p.P163R  | c.488C>G  | Unverified | CAG | CCA | GGC | 2 | C | G |
| TCGA-13-1408 | ERCC2      | ENST00000391945 | p.A503G  | c.1508C>G | Unverified | GTG | GCC | ATC | 2 | C | G |
| TCGA-61-1740 | ERMAP      | ENST00000372514 | p.A432G  | c.1295C>G | Unverified | CAT | GCT | AAT | 2 | C | G |
| TCGA-23-1124 | ERVFRD-1   | ENST00000472091 | p.V256V  | c.768C>G  | Verified   | CAA | GTC | TTA | 3 | C | G |
| TCGA-09-2051 | ESPL1      | ENST00000257934 | p.S1820S | c.5460C>G | Unverified | GCC | TCC | CGC | 3 | C | G |
| TCGA-04-1336 | ETAA1      | ENST00000272342 | p.Q622E  | c.1864C>G | Verified   | ACT | CAG | CAA | 1 | C | G |
| TCGA-24-2288 | ETS1       | ENST00000319397 | p.P190R  | c.569C>G  | Unverified | cat | ccc | atc | 2 | C | G |
| TCGA-61-1740 | EVPL       | ENST00000301607 | p.T327T  | c.981C>G  | Unverified | GAG | ACC | CAG | 3 | C | G |
| TCGA-29-1766 | EXOC3      | ENST00000315013 | p.N313K  | c.939C>G  | Unverified | CTG | AAC | ATG | 3 | C | G |
| TCGA-13-0923 | EYA3       | ENST00000373871 | p.L480V  | c.1438C>G | Verified   | GTT | CTG | ATC | 1 | C | G |
| TCGA-20-1683 | EYA4       | ENST00000367895 | p.A36G   | c.107C>G  | Unverified | CTA | GCA | AGT | 2 | C | G |
| TCGA-20-1683 | EYA4_ENSTC | ENST00000355167 | p.A36G   | c.107C>G  | Unverified | CTA | GCA | AGT | 2 | C | G |
| TCGA-24-0975 | FAAH2      | ENST00000374900 | p.S408S  | c.1224C>G | Verified   | CCT | TCC | ATT | 3 | C | G |
| TCGA-09-2056 | FADS2      | ENST00000278840 | p.P77R   | c.230C>G  | Verified   | CAC | CCT | GAC | 2 | C | G |
| TCGA-24-1563 | FAM111A    | ENST00000528737 | p.T366S  | c.1097C>G | Verified   | GCA | ACT | ACG | 2 | C | G |
| TCGA-25-2401 | FAM116A    | ENST00000311128 | p.P202A  | c.604C>G  | Unverified | GAA | CCT | TAT | 1 | C | G |
| TCGA-61-1907 | FAM120C    | ENST00000375180 | p.S1059C | c.3176C>G | Unverified | TTA | TCC | AGA | 2 | C | G |

|              |            |                     |          |            |            |     |     |     |   |   |   |
|--------------|------------|---------------------|----------|------------|------------|-----|-----|-----|---|---|---|
| TCGA-23-2078 | FAM123C    | ENST00000321420     | p.P639R  | c.1916C>G  | Unverified | TGG | CCC | TGC | 2 | C | G |
| TCGA-23-1021 | FAM129A    | ENST00000367511     | p.P728R  | c.2183C>G  | Verified   | GCT | CCA | GTG | 2 | C | G |
| TCGA-24-1103 | FAM135B    | ENST00000395297     | p.T1259T | c.3777C>G  | Verified   | AGC | ACC | CTG | 3 | C | G |
| TCGA-13-1501 | FAM161A    | ENST00000307507     | p.L184L  | c.552C>G   | Verified   | TTT | CTC | CCC | 3 | C | G |
| TCGA-13-1501 | FAM161A    | ENST00000307507     | p.L184L  | c.552C>G   | Verified   | TTT | CTC | CCC | 3 | C | G |
| TCGA-04-1331 | FAM166A    | ENST00000344774     | p.P140A  | c.418C>G   | Unverified | TGC | CCA | CCA | 1 | C | G |
| TCGA-20-1683 | FAM171B    | ENST00000304698     | p.P250R  | c.749C>G   | Unverified | ACT | CCT | CTT | 2 | C | G |
| TCGA-04-1362 | FAM183A    | ENST00000335282     | p.P52P   | c.156C>G   | Verified   | AAG | CCC | ATG | 3 | C | G |
| TCGA-24-1435 | FAM35A     | ENST00000358313     | p.A644G  | c.1931C>G  | Verified   | GGA | GCA | GCC | 2 | C | G |
| TCGA-13-0807 | FAM47B     | ENST00000329357     | p.S453C  | c.1358C>G  | Verified   | GAC | TCT | CTT | 2 | C | G |
| TCGA-04-1362 | FAM47C     | ENST00000358047     | p.P644A  | c.1930C>G  | Unverified | cgc | ccg | gag | 1 | C | G |
| TCGA-13-0761 | FAM53B     | ENST00000337318     | p.P108A  | c.322C>G   | Verified   | GCA | CCC | CCT | 1 | C | G |
| TCGA-13-0761 | FAM53B     | ENST00000337318     | p.P108A  | c.322C>G   | Verified   | GCA | CCC | CCT | 1 | C | G |
| TCGA-61-1915 | FAM57B     | ENST00000380495     | p.T169R  | c.506C>G   | Unverified | AGC | ACG | CCC | 2 | C | G |
| TCGA-13-0760 | FAM81A     | ENST00000288228     | p.L29V   | c.85C>G    | Verified   | AGC | CTC | GTG | 1 | C | G |
| TCGA-13-1505 | FAM90A1    | ENST00000307435     | p.P7P    | c.21C>G    | Verified   | GAC | CCC | AAA | 3 | C | G |
| TCGA-04-1361 | FAM91A1    | ENST00000334705     | p.P547A  | c.1639C>G  | Verified   | CCA | CCA | TCC | 1 | C | G |
| TCGA-04-1361 | FAM91A1    | ENST00000334705     | p.P547A  | c.1639C>G  | Verified   | CCA | CCA | TCC | 1 | C | G |
| TCGA-61-1733 | FAM98C     | ENST00000252530     | p.P325P  | c.975C>G   | Unverified | CCT | CCC | ATG | 3 | C | G |
| TCGA-61-1733 | FAM98C     | ENST00000252530     | p.P325P  | c.975C>G   | Unverified | CCT | CCC | ATG | 3 | C | G |
| TCGA-24-1845 | FARSA      | ENST00000314606     | p.G470G  | c.1410C>G  | Unverified | TAT | GGC | ATC | 3 | C | G |
| TCGA-61-1913 | FAT        | ENST00000441802     | p.L334L  | c.1002C>G  | Unverified | AAT | CTC | ACA | 3 | C | G |
| TCGA-61-1913 | FAT1       | ENST00000441802     | p.L334L  | c.1002C>G  | Unverified | AAT | CTC | ACA | 3 | C | G |
| TCGA-61-2109 | FAT1       | ENST00000441802     | p.S1553R | c.4659C>G  | Unverified | GTC | AGC | GAC | 3 | C | G |
| TCGA-20-0991 | FAT2       | ENST00000261800     | p.P2732A | c.8194C>G  | Verified   | ACA | CCT | GAG | 1 | C | G |
| TCGA-09-2049 | FAT3_ENSTC | ENST00000298047_v61 | p.A2778G | c.8333C>G  | Verified   | CCA | GCT | TTC | 2 | C | G |
| TCGA-04-1655 | FAT4       | ENST00000330166     | p.P2870A | c.8608C>G  | Unverified | GCT | CCA | AGA | 1 | C | G |
| TCGA-29-1703 | FAT4       | ENST00000330166     | p.L4738V | c.14212C>G | Unverified | AGG | CTC | AAC | 1 | C | G |
| TCGA-04-1655 | FAT4_ENSTC | ENST00000394329     | p.P2870A | c.8608C>G  | Unverified | GCT | CCA | AGA | 1 | C | G |
| TCGA-29-1703 | FAT4_ENSTC | ENST00000394329     | p.L4795V | c.14383C>G | Unverified | AGG | CTC | AAC | 1 | C | G |
| TCGA-13-1481 | FBLN5      | ENST00000342058     | p.L325V  | c.973C>G   | Verified   | TAT | CTG | AGG | 1 | C | G |
| TCGA-13-0900 | FBLN5      | ENST00000342058     | p.S100*  | c.299C>G   | Verified   | CTC | TCA | GCT | 2 | C | G |
| TCGA-24-1845 | FBXL19     | NM_019085.1         | p.L171V  | c.511C>G   | Unverified | tcg | ctg | agt | 1 | C | G |
| TCGA-24-1845 | FBXL19_ENS | ENST00000380310     | p.L341V  | c.1021C>G  | Unverified | TCG | CTG | AGT | 1 | C | G |

|              |             |                 |          |           |            |     |     |     |   |   |   |
|--------------|-------------|-----------------|----------|-----------|------------|-----|-----|-----|---|---|---|
| TCGA-24-1422 | FBXO15      | ENST00000269500 | p.S204C  | c.611C>G  | Verified   | ata | tct | acc | 2 | C | G |
| TCGA-23-1114 | FBXO38      | ENST00000340253 | p.I681M  | c.2043C>G | Unverified | cag | atc | aaa | 3 | C | G |
| TCGA-23-1114 | FBXO46      | ENST00000317683 | p.R192G  | c.574C>G  | Unverified | cca | cga | ccg | 1 | C | G |
| TCGA-04-1530 | FBXW2       | NM_012164.2     | p.L261V  | c.781C>G  | Verified   | tgc | ctg | aac | 1 | C | G |
| TCGA-23-1122 | FCGRT       | ENST00000221466 | p.S60R   | c.180C>G  | Verified   | CTG | AGC | TAC | 3 | C | G |
| TCGA-24-2024 | FETUB       | ENST00000265029 | p.F82L   | c.246C>G  | Verified   | CTG | TTC | TAT | 3 | C | G |
| TCGA-04-1331 | FEZ1        | ENST00000278919 | p.P17P   | c.51C>G   | Verified   | cga | ccc | tcc | 3 | C | G |
| TCGA-13-0885 | FGD1        | ENST00000375135 | p.L908V  | c.2722C>G | Verified   | gaa | cta | cag | 1 | C | G |
| TCGA-23-1809 | FGFR2       | ENST00000358487 | p.P253R  | c.758C>G  | Unverified | TCG | CCT | CAC | 2 | C | G |
| TCGA-23-1809 | FGFR2_ENST  | ENST00000351936 | p.P253R  | c.758C>G  | Unverified | TCG | CCT | CAC | 2 | C | G |
| TCGA-23-1809 | FGFR2_ENST  | ENST00000357555 | p.P164R  | c.491C>G  | Unverified | TCG | CCT | CAC | 2 | C | G |
| TCGA-23-1809 | FGFR2_ENST  | ENST00000457416 | p.P253R  | c.758C>G  | Unverified | TCG | CCT | CAC | 2 | C | G |
| TCGA-23-1123 | FH          | ENST00000366560 | p.T442R  | c.1325C>G | Verified   | aat | aca | gaa | 2 | C | G |
| TCGA-23-1123 | FH          | ENST00000366560 | p.T442R  | c.1325C>G | Verified   | aat | aca | gaa | 2 | C | G |
| TCGA-13-0904 | FHDC1       | ENST00000260008 | p.R210G  | c.628C>G  | Verified   | TTG | CGA | GAA | 1 | C | G |
| TCGA-13-1505 | FHOD1       | ENST00000258201 | p.P50A   | c.148C>G  | Unverified | CTG | CCC | TTG | 1 | C | G |
| TCGA-24-1845 | FIP1L1_ENST | ENST00000337488 | p.L152V  | c.454C>G  | Unverified | CCA | CTC | TTA | 1 | C | G |
| TCGA-04-1347 | FKBP8       | ENST00000222308 | p.A222G  | c.665C>G  | Verified   | ctg | gcc | aac | 2 | C | G |
| TCGA-30-1891 | FKBP8       | ENST00000222308 | p.V118V  | c.354C>G  | Unverified | ccg | gtc | aag | 3 | C | G |
| TCGA-61-1913 | FLG2        | ENST00000388718 | p.S1491C | c.4472C>G | Unverified | GGG | TCC | AGT | 2 | C | G |
| TCGA-13-0886 | FLJ44216    | ENST00000345702 | p.T584T  | c.1752C>G | Verified   | CAG | ACC | CTG | 3 | C | G |
| TCGA-29-1764 | FN1         | ENST00000336916 | p.Q792E  | c.2374C>G | Unverified | TAT | CAG | ATA | 1 | C | G |
| TCGA-13-0905 | FN1         | ENST00000336916 | p.T2132S | c.6395C>G | Verified   | CTC | ACC | AGA | 2 | C | G |
| TCGA-29-1764 | FN1_ENSTO   | ENST00000354785 | p.Q792E  | c.2374C>G | Unverified | TAT | CAG | ATA | 1 | C | G |
| TCGA-61-1900 | FNDC3A      | ENST00000492622 | p.L20V   | c.58C>G   | Unverified | TCT | CTT | TTG | 1 | C | G |
| TCGA-25-2401 | FOXB1       | ENST00000396057 | p.P91R   | c.272C>G  | Verified   | CAC | CCA | AGC | 2 | C | G |
| TCGA-25-2401 | FOXJ2       | ENST00000162391 | p.P335A  | c.1003C>G | Verified   | cct | cca | ctg | 1 | C | G |
| TCGA-25-2042 | FOXK1       | ENST00000328914 | p.T600R  | c.1799C>G | Unverified | CAC | ACG | GTC | 2 | C | G |
| TCGA-13-0904 | FPR2        | ENST00000340023 | p.L162L  | c.486C>G  | Verified   | TTC | CTC | TTT | 3 | C | G |
| TCGA-24-2288 | FREM1       | ENST00000422223 | p.P295A  | c.883C>G  | Unverified | ATT | CCA | AAG | 1 | C | G |
| TCGA-13-0885 | FREM1       | ENST00000422223 | p.N1830K | c.5490C>G | Verified   | CTG | AAC | TCC | 3 | C | G |
| TCGA-61-1900 | FRMD4B      | ENST00000264546 | p.A462G  | c.1385C>G | Unverified | GAA | GCT | GCA | 2 | C | G |
| TCGA-61-1900 | FRMD4B_EM   | ENST00000398540 | p.A516G  | c.1547C>G | Unverified | GAA | GCT | GCA | 2 | C | G |
| TCGA-13-1497 | FRMPD3      | XM_042978.4     | p.R717G  | c.2149C>G | Verified   | tct | cgt | gac | 1 | C | G |

|              |            |                 |          |           |            |     |     |     |   |   |   |
|--------------|------------|-----------------|----------|-----------|------------|-----|-----|-----|---|---|---|
| TCGA-29-1762 | FRMPD3     | XM_042978.4     | p.P1428P | c.4284C>G | Unverified | agc | ccc | atc | 3 | C | G |
| TCGA-29-1762 | FRMPD3_EN  | ENST00000276185 | p.P1379P | c.4137C>G | Unverified | AGC | CCC | ATC | 3 | C | G |
| TCGA-13-0906 | FRY        | ENST00000380250 | p.R2486G | c.7456C>G | Verified   | AGA | CGT | TCT | 1 | C | G |
| TCGA-30-1718 | FRY        | ENST00000380250 | p.L856L  | c.2568C>G | Unverified | TGC | CTC | TTC | 3 | C | G |
| TCGA-61-1910 | FST        | ENST00000256759 | p.A29G   | c.86C>G   | Unverified | CAG | GCT | GGG | 2 | C | G |
| TCGA-23-1114 | FTSJ3      | ENST00000582115 | p.G8G    | c.24C>G   | Unverified | GTT | GGC | AAG | 3 | C | G |
| TCGA-23-2078 | G3BP1      | ENST00000394123 | p.P316R  | c.947C>G  | Verified   | GGA | CCC | AGA | 2 | C | G |
| TCGA-13-0792 | G6PD       | ENST00000291567 | p.F501L  | c.1503C>G | Verified   | GGT | TTC | CAG | 3 | C | G |
| TCGA-09-2056 | GAB2       | ENST00000361507 | p.S503R  | c.1509C>G | Verified   | ccc | agc | aga | 3 | C | G |
| TCGA-13-0792 | GAB2       | ENST00000361507 | p.S634S  | c.1902C>G | Verified   | tca | tcc | gtc | 3 | C | G |
| TCGA-24-1844 | GABBR1     | ENST00000377034 | p.S546R  | c.1638C>G | Unverified | GGC | AGC | TAC | 3 | C | G |
| TCGA-24-0979 | GADD45GIP  | ENST00000316939 | p.L163L  | c.489C>G  | Verified   | GAG | CTC | CTG | 3 | C | G |
| TCGA-61-2095 | GAL3ST4    | ENST00000360039 | p.D203E  | c.609C>G  | Unverified | GGG | GAC | CAC | 3 | C | G |
| TCGA-25-1326 | GALNT12    | ENST00000375011 | p.L153V  | c.457C>G  | Verified   | CTC | CTT | CGG | 1 | C | G |
| TCGA-09-2051 | GALNT6     | ENST00000356317 | p.P401P  | c.1203C>G | Unverified | ATC | CCC | TGC | 3 | C | G |
| TCGA-61-1737 | GARNL3     | ENST00000373387 | p.L1001V | c.3001C>G | Unverified | CAG | CTC | ACG | 1 | C | G |
| TCGA-61-2113 | GAS2L1_ENS | ENST00000333679 | p.T496T  | c.1488C>G | Unverified | GGC | ACC | ACA | 3 | C | G |
| TCGA-29-1761 | GBX2       | ENST00000306318 | p.L259V  | c.775C>G  | Unverified | CAG | CTG | CTG | 1 | C | G |
| TCGA-24-1849 | GCC1       | ENST00000321407 | p.S613C  | c.1838C>G | Unverified | GCC | TCT | GGG | 2 | C | G |
| TCGA-09-2051 | GCC2       | ENST00000309863 | p.Q1607E | c.4819C>G | Unverified | AAT | CAA | GAG | 1 | C | G |
| TCGA-13-1488 | GCNT4      | ENST00000322348 | p.S288C  | c.863C>G  | Verified   | ATC | TCC | AAG | 2 | C | G |
| TCGA-13-0890 | GDF2       | ENST00000249598 | p.A321G  | c.962C>G  | Verified   | agc | gcc | ggg | 2 | C | G |
| TCGA-13-0924 | GDF2       | ENST00000249598 | p.V75V   | c.225C>G  | Verified   | ggg | gtc | cct | 3 | C | G |
| TCGA-61-1725 | GDPD3      | ENST00000406256 | p.I234M  | c.702C>G  | Unverified | ATC | ATC | AAC | 3 | C | G |
| TCGA-24-2288 | GEN1       | ENST00000317402 | p.S102C  | c.305C>G  | Unverified | TGG | TCT | CAG | 2 | C | G |
| TCGA-24-1844 | GFM1       | ENST00000486715 | p.L360V  | c.1078C>G | Unverified | AAA | CTG | GAG | 1 | C | G |
| TCGA-24-1844 | GFM1_ENST  | ENST00000312756 | p.L94V   | c.280C>G  | Unverified | AAA | CTG | GAG | 1 | C | G |
| TCGA-23-1114 | GFRA1      | ENST00000369236 | p.S229C  | c.686C>G  | Unverified | TGC | TCC | TAT | 2 | C | G |
| TCGA-23-1114 | GFRA1      | ENST00000369236 | p.P144P  | c.432C>G  | Unverified | ATT | CCC | AAA | 3 | C | G |
| TCGA-10-0930 | GFRA3      | ENST00000274721 | p.V195V  | c.585C>G  | Verified   | CAC | GTC | TGC | 3 | C | G |
| TCGA-10-0930 | GFRA3      | ENST00000274721 | p.V195V  | c.585C>G  | Verified   | CAC | GTC | TGC | 3 | C | G |
| TCGA-23-1022 | GIMAP5     | ENST00000358647 | p.P51P   | c.153C>G  | Verified   | CAG | CCC | GTG | 3 | C | G |
| TCGA-13-0893 | GLI3       | ENST00000395925 | p.Q670E  | c.2008C>G | Verified   | ACT | CAG | GGA | 1 | C | G |
| TCGA-04-1362 | GLS        | ENST00000320717 | p.S586C  | c.1757C>G | Verified   | GAT | TCT | AGA | 2 | C | G |



|              |            |                 |          |           |            |     |     |     |   |   |   |
|--------------|------------|-----------------|----------|-----------|------------|-----|-----|-----|---|---|---|
| TCGA-13-0913 | GNAS       | ENST00000371085 | p.Y163*  | c.489C>G  | Verified   | tgc | tac | gaa | 3 | C | G |
| TCGA-23-1123 | GNAS       | ENST00000371085 | p.Y163*  | c.489C>G  | Verified   | tgc | tac | gaa | 3 | C | G |
| TCGA-23-1123 | GNAS       | ENST00000371085 | p.Y163*  | c.489C>G  | Verified   | tgc | tac | gaa | 3 | C | G |
| TCGA-25-1326 | GNAS       | ENST00000371085 | p.F273L  | c.819C>G  | Unverified | ctc | ttc | aag | 3 | C | G |
| TCGA-13-0913 | GNAS_ENST  | ENST00000371100 | p.Y806*  | c.2418C>G | Verified   | TGC | TAC | GAA | 3 | C | G |
| TCGA-23-1123 | GNAS_ENST  | ENST00000371100 | p.Y806*  | c.2418C>G | Verified   | TGC | TAC | GAA | 3 | C | G |
| TCGA-23-1123 | GNAS_ENST  | ENST00000371100 | p.Y806*  | c.2418C>G | Verified   | TGC | TAC | GAA | 3 | C | G |
| TCGA-25-1326 | GNAS_ENST  | ENST00000371100 | p.F916L  | c.2748C>G | Unverified | CTC | TTC | AAG | 3 | C | G |
| TCGA-29-1701 | GOLGA8J_EI | ENST00000567927 | p.D571E  | c.1713C>G | Unverified | GCA | GAC | AAG | 3 | C | G |
| TCGA-24-1604 | GOLGB1     | ENST00000340645 | p.Q1239E | c.3715C>G | Verified   | ATT | CAA | GTA | 1 | C | G |
| TCGA-23-1110 | GON4L      | ENST00000361040 | p.H303D  | c.907C>G  | Verified   | GAA | CAC | GTG | 1 | C | G |
| TCGA-13-1510 | GON4L_ENS  | ENST00000437809 | p.S2103* | c.6308C>G | Unverified | ACC | TCA | GAG | 2 | C | G |
| TCGA-29-1695 | GORASP2    | ENST00000234160 | p.P366R  | c.1097C>G | Unverified | CTC | CCG | TCA | 2 | C | G |
| TCGA-13-0792 | GP2        | ENST00000381362 | p.P51A   | c.151C>G  | Verified   | GCT | CCT | GGC | 1 | C | G |
| TCGA-24-1103 | GPBAR1     | ENST00000479077 | p.L246L  | c.738C>G  | Verified   | CTC | CTC | TCA | 3 | C | G |
| TCGA-24-1849 | GPC5       | ENST00000377067 | p.Y394*  | c.1182C>G | Unverified | CTG | TAC | AGG | 3 | C | G |
| TCGA-13-0916 | GPI        | ENST00000356487 | p.S367C  | c.1100C>G | Verified   | aaa | tct | gga | 2 | C | G |
| TCGA-13-0887 | GPR101     | ENST00000298110 | p.D77E   | c.231C>G  | Verified   | acc | gac | ctg | 3 | C | G |
| TCGA-13-0904 | GPR112     | ENST00000394143 | p.P538R  | c.1613C>G | Verified   | tta | ccc | aga | 2 | C | G |
| TCGA-61-1740 | GPR116     | ENST00000265417 | p.P1226A | c.3676C>G | Unverified | ACA | CCA | CTC | 1 | C | G |
| TCGA-23-1110 | GPR124     | ENST00000412232 | p.P869P  | c.2607C>G | Verified   | GCA | CCC | CCT | 3 | C | G |
| TCGA-20-1683 | GPR128     | ENST00000273352 | p.P115R  | c.344C>G  | Unverified | AAT | CCA | ATG | 2 | C | G |
| TCGA-23-1124 | GPR146     | ENST00000397095 | p.T247R  | c.740C>G  | Verified   | TGG | ACG | CCA | 2 | C | G |
| TCGA-61-1914 | GPR148     | ENST00000309926 | p.L183V  | c.547C>G  | Unverified | TTC | CTT | ATT | 1 | C | G |
| TCGA-25-2042 | GPR155     | ENST00000392551 | p.T416S  | c.1247C>G | Verified   | ACA | ACT | AAT | 2 | C | G |
| TCGA-24-2280 | GPR161     | ENST00000367835 | p.T38S   | c.113C>G  | Unverified | ATC | ACC | ATT | 2 | C | G |
| TCGA-13-0900 | GPR19      | ENST00000332427 | p.P405A  | c.1213C>G | Verified   | TGG | CCC | ATT | 1 | C | G |
| TCGA-24-0975 | GPR34      | ENST00000378142 | p.T356S  | c.1067C>G | Verified   | agc | act | tca | 2 | C | G |
| TCGA-24-1850 | GPR98      | ENST00000405460 | p.D1534E | c.4602C>G | Unverified | AAT | GAC | GAG | 3 | C | G |
| TCGA-24-1846 | GPRASP2    | ENST00000543253 | p.T52S   | c.155C>G  | Unverified | aaa | act | gag | 2 | C | G |
| TCGA-10-0930 | GPX2       | ENST00000389614 | p.R171R  | c.513C>G  | Verified   | AGC | CGC | ACC | 3 | C | G |
| TCGA-10-0930 | GPX2       | ENST00000389614 | p.R171R  | c.513C>G  | Verified   | AGC | CGC | ACC | 3 | C | G |
| TCGA-25-1313 | GRAMD1C    | ENST00000358160 | p.L325V  | c.973C>G  | Verified   | GAT | CTT | CAT | 1 | C | G |
| TCGA-61-2095 | GRB10      | ENST00000398812 | p.A86A   | c.258C>G  | Unverified | CAT | GCC | CGC | 3 | C | G |

|              |            |                     |          |           |            |     |     |     |   |   |   |
|--------------|------------|---------------------|----------|-----------|------------|-----|-----|-----|---|---|---|
| TCGA-13-0904 | GRIK2      | ENST00000318991     | p.G410G  | c.1230C>G | Verified   | AGT | GGC | CTG | 3 | C | G |
| TCGA-13-0904 | GRIK2_ENST | ENST00000421544     | p.G410G  | c.1230C>G | Verified   | AGT | GGC | CTG | 3 | C | G |
| TCGA-24-2024 | GRLF1_ENST | ENST00000317082_v61 | p.S985*  | c.2954C>G | Verified   | GAT | TCA | GAA | 2 | C | G |
| TCGA-29-1783 | GRM1       | ENST00000282753     | p.P369A  | c.1105C>G | Unverified | TTC | CCT | GAG | 1 | C | G |
| TCGA-29-1783 | GRM1_ENST  | ENST00000392299     | p.P369A  | c.1105C>G | Unverified | TTC | CCT | GAG | 1 | C | G |
| TCGA-13-0924 | GSDMC      | ENST00000276708     | p.L499L  | c.1497C>G | Verified   | ACT | CTC | TCG | 3 | C | G |
| TCGA-13-0714 | GSK3A      | ENST00000222330     | p.I122M  | c.366C>G  | Verified   | GAC | ATC | AAA | 3 | C | G |
| TCGA-61-2109 | GSK3A      | ENST00000222330     | p.H400Q  | c.1200C>G | Unverified | GCG | CAC | AGC | 3 | C | G |
| TCGA-13-0755 | GSS        | ENST00000216951     | p.Q64E   | c.190C>G  | Verified   | GAG | CAA | GCC | 1 | C | G |
| TCGA-13-0923 | GSS        | ENST00000216951     | p.P138A  | c.412C>G  | Verified   | TCC | CCA | GCC | 1 | C | G |
| TCGA-23-1124 | GTF2IRD2   | ENST00000405086     | p.T796S  | c.2387C>G | Verified   | GAG | ACT | CAT | 2 | C | G |
| TCGA-04-1530 | GTF3C3     | ENST00000263956     | p.D601E  | c.1803C>G | Verified   | AAT | GAC | CAA | 3 | C | G |
| TCGA-24-2288 | GUCY1B3    | ENST00000264424     | p.A443A  | c.1329C>G | Unverified | GGA | GCC | ATG | 3 | C | G |
| TCGA-24-2280 | GYS1       | ENST00000323798     | p.L349L  | c.1047C>G | Unverified | CGG | CTC | AAC | 3 | C | G |
| TCGA-61-1733 | GYS2       | ENST00000261195     | p.I552M  | c.1656C>G | Unverified | TAC | ATC | GTT | 3 | C | G |
| TCGA-61-1733 | GYS2       | ENST00000261195     | p.I552M  | c.1656C>G | Unverified | TAC | ATC | GTT | 3 | C | G |
| TCGA-29-1769 | HABP4      | ENST00000375249     | p.G194G  | c.582C>G  | Unverified | CGC | GGC | AGA | 3 | C | G |
| TCGA-13-1498 | HAP1       | ENST00000347901     | p.A522G  | c.1565C>G | Verified   | CCG | GCT | GAG | 2 | C | G |
| TCGA-24-0979 | HDAC5      | ENST00000393622     | p.Q583E  | c.1747C>G | Verified   | ACA | CAG | GAA | 1 | C | G |
| TCGA-13-1497 | HEATR5B    | ENST00000233099     | p.P1922R | c.5765C>G | Verified   | ACT | CCT | TAT | 2 | C | G |
| TCGA-04-1367 | HECTD1     | ENST00000399332     | p.C1893W | c.5679C>G | Verified   | GGT | TGC | TGG | 3 | C | G |
| TCGA-13-0904 | HECW1      | ENST00000395891     | p.R859G  | c.2575C>G | Verified   | CAG | CGT | CCG | 1 | C | G |
| TCGA-23-1022 | HELQ       | ENST00000295488     | p.L1046L | c.3138C>G | Verified   | GTG | CTC | GTA | 3 | C | G |
| TCGA-13-0883 | HEPACAM2   | ENST00000341723     | p.L192V  | c.574C>G  | Verified   | ACC | CTT | CAT | 1 | C | G |
| TCGA-20-0991 | HERPUD2    | ENST00000396081     | p.P92P   | c.276C>G  | Verified   | CCT | CCC | AGT | 3 | C | G |
| TCGA-61-1998 | HEXA       | ENST00000268097     | p.T217S  | c.650C>G  | Verified   | TTC | ACT | TTT | 2 | C | G |
| TCGA-13-1481 | HIPK1      | NM_152696           | p.Y70*   | c.210C>G  | Verified   | gct | tac | gac | 3 | C | G |
| TCGA-13-0884 | HIPK2      | NM_022740           | p.S604S  | c.1812C>G | Verified   | att | tcc | tta | 3 | C | G |
| TCGA-25-1326 | HIST1H1A   | ENST00000244573     | p.P169A  | c.505C>G  | Verified   | AAT | CCA | AAA | 1 | C | G |
| TCGA-13-1501 | HIST1H1A   | ENST00000244573     | p.T95R   | c.284C>G  | Verified   | GGA | ACG | TTG | 2 | C | G |
| TCGA-13-1501 | HIST1H1A   | ENST00000244573     | p.T95R   | c.284C>G  | Verified   | GGA | ACG | TTG | 2 | C | G |
| TCGA-24-1616 | HIST1H1C   | ENST00000343677     | p.T4S    | c.11C>G   | Verified   | gag | act | gct | 2 | C | G |
| TCGA-23-1117 | HIST1H2BD  | ENST00000377777     | p.A118A  | c.354C>G  | Verified   | AAG | GCC | GTC | 3 | C | G |
| TCGA-23-1117 | HIST1H2BD  | ENST00000377777     | p.A118A  | c.354C>G  | Verified   | AAG | GCC | GTC | 3 | C | G |

|              |           |                 |          |           |            |     |     |     |   |   |   |
|--------------|-----------|-----------------|----------|-----------|------------|-----|-----|-----|---|---|---|
| TCGA-20-1683 | HIST1H2BI | ENST00000377733 | p.P2R    | c.5C>G    | Unverified | ATG | CCT | GAA | 2 | C | G |
| TCGA-61-1740 | HIST1H2BJ | ENST00000541790 | p.A111A  | c.333C>G  | Unverified | CAC | GCC | GTG | 3 | C | G |
| TCGA-25-1313 | HIST1H3C  | ENST00000540144 | p.R3G    | c.7C>G    | Verified   | GCT | CGT | ACG | 1 | C | G |
| TCGA-13-1481 | HIST1H3H  | ENST00000369163 | p.R9G    | c.25C>G   | Verified   | GCT | CGC | AAG | 1 | C | G |
| TCGA-23-1031 | HIST1H3J  | ENST00000359303 | p.R9R    | c.27C>G   | Verified   | GCT | CGC | AAG | 3 | C | G |
| TCGA-13-0795 | HIST1H4H  | ENST00000377727 | p.S2C    | c.5C>G    | Verified   | ATG | TCT | GGC | 2 | C | G |
| TCGA-04-1362 | HIVEP2    | ENST00000012134 | p.L1693V | c.5077C>G | Verified   | GCT | CTT | CTG | 1 | C | G |
| TCGA-24-2024 | HK1       | ENST00000404387 | p.L87V   | c.259C>G  | Verified   | GCC | CTG | GAT | 1 | C | G |
| TCGA-24-2035 | HKDC1     | ENST00000354624 | p.T811R  | c.2432C>G | Verified   | AGC | ACG | TGT | 2 | C | G |
| TCGA-61-1910 | HLA-DPA1  | ENST00000419277 | p.P186P  | c.558C>G  | Unverified | GTG | CCC | TCA | 3 | C | G |
| TCGA-09-2051 | HLX       | ENST00000366903 | p.Q270E  | c.808C>G  | Unverified | CCG | CAG | ACG | 1 | C | G |
| TCGA-09-2049 | HMBX1     | ENST00000397358 | p.R268G  | c.802C>G  | Verified   | CGA | CGA | GGG | 1 | C | G |
| TCGA-61-1904 | HMCN1     | ENST00000271588 | p.Q1161E | c.3481C>G | Unverified | ACT | CAG | GCT | 1 | C | G |
| TCGA-13-0762 | HMCN1     | ENST00000271588 | p.S1798* | c.5393C>G | Verified   | GTG | TCA | AAC | 2 | C | G |
| TCGA-13-0762 | HMCN1     | ENST00000271588 | p.S1798* | c.5393C>G | Verified   | GTG | TCA | AAC | 2 | C | G |
| TCGA-61-1725 | HMCN1     | ENST00000271588 | p.P1919R | c.5756C>G | Unverified | CCA | CCT | AGT | 2 | C | G |
| TCGA-61-1914 | HNF4A     | ENST00000316099 | p.P51R   | c.152C>G  | Unverified | gcg | ccc | aac | 2 | C | G |
| TCGA-61-1914 | HNF4A_ENS | ENST00000443598 | p.P51R   | c.152C>G  | Unverified | GCG | CCC | AAC | 2 | C | G |
| TCGA-24-1103 | HNRNPA2B1 | ENST00000356674 | p.G270G  | c.810C>G  | Verified   | GGG | GGC | TAC | 3 | C | G |
| TCGA-25-1313 | HPN       | ENST00000392226 | p.I332M  | c.996C>G  | Verified   | CAG | ATC | AAG | 3 | C | G |
| TCGA-61-1738 | HR        | ENST00000381418 | p.H1055Q | c.3165C>G | Unverified | TGG | CAC | GTG | 3 | C | G |
| TCGA-61-1738 | HR        | ENST00000381418 | p.H1055Q | c.3165C>G | Unverified | TGG | CAC | GTG | 3 | C | G |
| TCGA-29-1781 | HSD3B7    | ENST00000297679 | p.H155Q  | c.465C>G  | Unverified | GTG | CAC | AGG | 3 | C | G |
| TCGA-29-1703 | HSDL2     | ENST00000398805 | p.L321V  | c.961C>G  | Unverified | TCT | CTC | AGT | 1 | C | G |
| TCGA-29-1784 | HSPA1L    | ENST00000375654 | p.P178R  | c.533C>G  | Unverified | GAG | CCC | ACG | 2 | C | G |
| TCGA-29-1693 | HSPB8     | ENST00000281938 | p.R18G   | c.52C>G   | Unverified | CGC | CGA | GAC | 1 | C | G |
| TCGA-29-1693 | HSPB8_ENS | ENST00000281938 | p.R18G   | c.52C>G   | Unverified | CGC | CGA | GAC | 1 | C | G |
| TCGA-23-1021 | HTR2A     | ENST00000378688 | p.Q398E  | c.1192C>G | Verified   | TGT | CAG | TAC | 1 | C | G |
| TCGA-13-0913 | HTR4      | ENST00000360693 | p.P290R  | c.869C>G  | Verified   | GTC | CCT | GGG | 2 | C | G |
| TCGA-09-2050 | HUWE1     | XM_497119.1     | p.S1766* | c.5297C>G | Verified   | ggc | tca | gga | 2 | C | G |
| TCGA-09-2051 | HYAL4     | ENST00000223026 | p.L79V   | c.235C>G  | Unverified | CCA | CTG | GCC | 1 | C | G |
| TCGA-04-1338 | IBTK      | ENST00000306270 | p.D769E  | c.2307C>G | Verified   | TGT | GAC | GTG | 3 | C | G |
| TCGA-61-1725 | ICOS      | ENST00000316386 | p.T188R  | c.563C>G  | Unverified | AAC | ACA | GCC | 2 | C | G |
| TCGA-30-1855 | IDS       | ENST00000340855 | p.P371A  | c.1111C>G | Unverified | ctt | ccg | gag | 1 | C | G |

|              |             |                 |          |           |            |     |     |     |   |   |   |
|--------------|-------------|-----------------|----------|-----------|------------|-----|-----|-----|---|---|---|
| TCGA-04-1649 | IFI44L      | ENST00000342282 | p.D127E  | c.381C>G  | Unverified | CTA | GAC | GAC | 3 | C | G |
| TCGA-04-1649 | IFI44L_ENST | ENST00000370751 | p.D166E  | c.498C>G  | Unverified | CTA | GAC | GAC | 3 | C | G |
| TCGA-13-0807 | IFNA1       | ENST00000276927 | p.R148G  | c.442C>G  | Verified   | TTC | CGA | AGA | 1 | C | G |
| TCGA-04-1652 | IFNA21      | ENST00000380225 | p.P49A   | c.145C>G  | Unverified | TCT | CCT | TTC | 1 | C | G |
| TCGA-04-1652 | IFNA21      | ENST00000380225 | p.P49A   | c.145C>G  | Unverified | TCT | CCT | TTC | 1 | C | G |
| TCGA-23-1123 | IFNA5       | ENST00000259555 | p.T110S  | c.329C>G  | Verified   | TAC | ACT | GAA | 2 | C | G |
| TCGA-23-1123 | IFNA5       | ENST00000259555 | p.T110S  | c.329C>G  | Verified   | TAC | ACT | GAA | 2 | C | G |
| TCGA-13-1497 | IFT52       | ENST00000373039 | p.P319A  | c.955C>G  | Verified   | GAA | CCA | CTC | 1 | C | G |
| TCGA-24-1435 | IFT81       | ENST00000361948 | p.S307C  | c.920C>G  | Verified   | CAT | TCT | GAT | 2 | C | G |
| TCGA-13-0890 | IGF2R       | ENST00000356956 | p.R1949G | c.5845C>G | Verified   | TAC | CGG | ACA | 1 | C | G |
| TCGA-24-1845 | IGSF1       | ENST00000361420 | p.S1227R | c.3681C>G | Unverified | TGC | AGC | TAC | 3 | C | G |
| TCGA-04-1347 | IGSF10      | ENST00000282466 | p.P1082R | c.3245C>G | Verified   | TTT | CCA | AGT | 2 | C | G |
| TCGA-13-1498 | IKZF4_ENST  | ENST00000262032 | p.I392M  | c.1176C>G | Verified   | TGC | ATC | TCA | 3 | C | G |
| TCGA-23-1032 | IL28A       | ENST00000331982 | p.S67W   | c.200C>G  | Verified   | GAG | TCG | CTT | 2 | C | G |
| TCGA-13-0923 | IL4I1       | ENST00000341114 | p.R124G  | c.370C>G  | Verified   | TAC | CGG | GAC | 1 | C | G |
| TCGA-24-2288 | ILF3        | ENST00000318511 | p.T238S  | c.713C>G  | Unverified | TGC | ACT | CGC | 2 | C | G |
| TCGA-24-2267 | IMPAD1      | ENST00000262644 | p.A269G  | c.806C>G  | Verified   | GGT | GCT | GGT | 2 | C | G |
| TCGA-09-2051 | INPP4A      | ENST00000074304 | p.R456G  | c.1366C>G | Unverified | ACA | CGG | CAG | 1 | C | G |
| TCGA-25-2398 | INPP5D      | NM_005541.2     | p.F28L   | c.84C>G   | Verified   | agc | ttc | ctc | 3 | C | G |
| TCGA-30-1855 | INPP5F      | ENST00000361976 | p.I235M  | c.705C>G  | Unverified | atg | atc | caa | 3 | C | G |
| TCGA-61-1740 | INPPL1      | ENST00000298229 | p.A785A  | c.2355C>G | Unverified | GAT | GCC | CAG | 3 | C | G |
| TCGA-20-1685 | INSR        | ENST00000302850 | p.S636S  | c.1908C>G | Unverified | TCA | TCC | CAG | 3 | C | G |
| TCGA-20-1685 | INSR_ENSTO  | ENST00000302850 | p.S636S  | c.1908C>G | Unverified | TCA | TCC | CAG | 3 | C | G |
| TCGA-23-1118 | INSRR       | ENST00000368195 | p.P160R  | c.479C>G  | Verified   | CAG | CCA | GCA | 2 | C | G |
| TCGA-04-1343 | INTS4       | ENST00000534064 | p.V184V  | c.552C>G  | Verified   | AGT | GTC | ACA | 3 | C | G |
| TCGA-13-0906 | INVS        | ENST00000262457 | p.I447M  | c.1341C>G | Verified   | AAG | ATC | AAT | 3 | C | G |
| TCGA-29-1691 | IPP         | ENST00000396478 | p.A10G   | c.29C>G   | Unverified | GCT | GCT | GAT | 2 | C | G |
| TCGA-04-1336 | IQCC        | ENST00000291358 | p.R38G   | c.112C>G  | Verified   | GTA | CGA | GAG | 1 | C | G |
| TCGA-25-2392 | IQCD        | ENST00000299732 | p.S133C  | c.398C>G  | Unverified | CTT | TCC | ATA | 2 | C | G |
| TCGA-29-1699 | IQCH        | ENST00000335894 | p.P537R  | c.1610C>G | Unverified | ACA | CCT | GAA | 2 | C | G |
| TCGA-61-1737 | IQGAP2      | ENST00000274364 | p.L1535V | c.4603C>G | Unverified | CAA | CTC | AAT | 1 | C | G |
| TCGA-13-1512 | IQGAP3      | ENST00000361170 | p.L1130V | c.3388C>G | Verified   | TTC | CTT | TTA | 1 | C | G |
| TCGA-13-1489 | IQGAP3      | ENST00000361170 | p.A487A  | c.1461C>G | Verified   | GAT | GCC | CTG | 3 | C | G |
| TCGA-61-1900 | IRAK4       | ENST00000448290 | p.P148A  | c.442C>G  | Unverified | CCA | CCT | GAC | 1 | C | G |

|              |            |                 |          |           |            |     |     |     |   |   |   |
|--------------|------------|-----------------|----------|-----------|------------|-----|-----|-----|---|---|---|
| TCGA-61-1900 | IRAK4_ENST | ENST00000448290 | p.P148A  | c.442C>G  | Unverified | CCA | CCT | GAC | 1 | C | G |
| TCGA-09-2051 | IRX4       | NM_016358.1     | p.G143G  | c.429C>G  | Unverified | agc | ggc | acg | 3 | C | G |
| TCGA-61-2113 | ISLR2      | ENST00000361742 | p.P560R  | c.1679C>G | Unverified | CGG | CCG | GGT | 2 | C | G |
| TCGA-61-2009 | ITGA3      | ENST00000007722 | p.P364R  | c.1091C>G | Verified   | GGC | CCC | AGT | 2 | C | G |
| TCGA-13-0920 | ITGA5      | ENST00000293379 | p.S769R  | c.2307C>G | Verified   | CTC | AGC | AAG | 3 | C | G |
| TCGA-29-1691 | ITGAL      | ENST00000356798 | p.P994R  | c.2981C>G | Unverified | GAG | CCT | CCC | 2 | C | G |
| TCGA-04-1338 | ITIH5      | ENST00000256861 | p.T410R  | c.1229C>G | Verified   | CCC | ACG | GTC | 2 | C | G |
| TCGA-13-0714 | ITPKB      | NM_002221       | p.T435S  | c.1304C>G | Verified   | cag | acc | ctg | 2 | C | G |
| TCGA-23-1116 | ITPKC      | ENST00000263370 | p.L449V  | c.1345C>G | Unverified | CCG | CTG | CGA | 1 | C | G |
| TCGA-61-1740 | ITPR2      | ENST00000381340 | p.A591G  | c.1772C>G | Unverified | TTG | GCA | GAA | 2 | C | G |
| TCGA-23-1809 | ITPR3      | ENST00000374316 | p.L651L  | c.1953C>G | Unverified | GAG | CTC | ATC | 3 | C | G |
| TCGA-23-1809 | ITPR3_ENST | ENST00000374316 | p.L651L  | c.1953C>G | Unverified | GAG | CTC | ATC | 3 | C | G |
| TCGA-09-1665 | ITSN1      | ENST00000381318 | p.L1487L | c.4461C>G | Verified   | TTC | CTC | CTG | 3 | C | G |
| TCGA-20-1687 | ITSN2      | ENST00000355123 | p.P133A  | c.397C>G  | Unverified | CCT | CCA | GCT | 1 | C | G |
| TCGA-29-1766 | ITSN2      | ENST00000355123 | p.L1426V | c.4276C>G | Unverified | TCT | CTC | ACC | 1 | C | G |
| TCGA-23-1122 | ITSN2      | ENST00000355123 | p.S330C  | c.989C>G  | Verified   | CCA | TCT | TTC | 2 | C | G |
| TCGA-20-1687 | ITSN2_ENST | ENST00000406921 | p.P133A  | c.397C>G  | Unverified | CCT | CCA | GCT | 1 | C | G |
| TCGA-29-1775 | IVL        | ENST00000368764 | p.Q505E  | c.1513C>G | Unverified | GAA | CAG | CAG | 1 | C | G |
| TCGA-23-1117 | IZUMO1     | ENST00000332955 | p.A243A  | c.729C>G  | Verified   | CCA | GCC | ACG | 3 | C | G |
| TCGA-23-1117 | IZUMO1     | ENST00000332955 | p.A243A  | c.729C>G  | Verified   | CCA | GCC | ACG | 3 | C | G |
| TCGA-29-1775 | JAKMIP2    | ENST00000265272 | p.Q400E  | c.1198C>G | Unverified | CAA | CAG | AAC | 1 | C | G |
| TCGA-23-1114 | JPH2       | ENST00000372980 | p.P576P  | c.1728C>G | Unverified | CCG | CCC | GAG | 3 | C | G |
| TCGA-04-1337 | KATNA1     | ENST00000335647 | p.I313M  | c.939C>G  | Unverified | TCC | ATC | TGT | 3 | C | G |
| TCGA-61-2095 | KAZALD1    | ENST00000370200 | p.L106V  | c.316C>G  | Unverified | CAG | CTT | GAG | 1 | C | G |
| TCGA-09-2050 | KCNA4      | ENST00000328224 | p.R68G   | c.202C>G  | Verified   | TCA | CGC | GGG | 1 | C | G |
| TCGA-13-0761 | KCND1      | ENST00000218176 | p.P639P  | c.1917C>G | Verified   | ttc | ccc | gag | 3 | C | G |
| TCGA-13-0761 | KCND1      | ENST00000218176 | p.P639P  | c.1917C>G | Verified   | ttc | ccc | gag | 3 | C | G |
| TCGA-04-1342 | KCND2      | ENST00000331113 | p.V294V  | c.882C>G  | Unverified | CGA | GTC | TTC | 3 | C | G |
| TCGA-61-1907 | KCNH7      | ENST00000332142 | p.A745A  | c.2235C>G | Unverified | AAA | GCC | TTT | 3 | C | G |
| TCGA-24-2280 | KCNH8      | ENST00000328405 | p.R166G  | c.496C>G  | Unverified | AGA | CGG | AGT | 1 | C | G |
| TCGA-13-0807 | KCNK16     | ENST00000373229 | p.G286G  | c.858C>G  | Verified   | AGA | GGC | TCT | 3 | C | G |
| TCGA-25-1326 | KCNMB1     | ENST00000274629 | p.T30T   | c.90C>G   | Verified   | ATC | ACC | TAC | 3 | C | G |
| TCGA-24-1847 | KCNMB3     | ENST00000314235 | p.P27A   | c.79C>G   | Unverified | TTT | CCT | GCC | 1 | C | G |
| TCGA-24-1847 | KCNMB3_EN  | ENST00000349697 | p.P25A   | c.73C>G   | Unverified | TTT | CCT | GCC | 1 | C | G |

|              |            |                     |          |           |            |     |     |     |   |   |   |
|--------------|------------|---------------------|----------|-----------|------------|-----|-----|-----|---|---|---|
| TCGA-24-1847 | KCNMB3_E   | ENST00000392685     | p.P23A   | c.67C>G   | Unverified | TTT | CCT | GCC | 1 | C | G |
| TCGA-24-1847 | KCNMB3_E   | ENST00000497599     | p.P25A   | c.73C>G   | Unverified | TTT | CCT | GCC | 1 | C | G |
| TCGA-13-0905 | KCNQ3      | ENST00000388996     | p.P608R  | c.1823C>G | Verified   | AGA | CCA | TCC | 2 | C | G |
| TCGA-61-1740 | KCNQ3      | ENST00000388996     | p.L261L  | c.783C>G  | Unverified | GAA | CTC | ATC | 3 | C | G |
| TCGA-61-1914 | KCTD19     | ENST00000304372     | p.S44*   | c.131C>G  | Unverified | GCT | TCA | GCC | 2 | C | G |
| TCGA-13-1498 | KDM3A      | ENST00000409556     | p.P876P  | c.2628C>G | Verified   | ACA | CCC | GTA | 3 | C | G |
| TCGA-24-1474 | KEAP1      | ENST00000393623     | p.N189K  | c.567C>G  | Unverified | GCC | AAC | TTC | 3 | C | G |
| TCGA-13-0883 | KHDRBS2    | ENST00000281156     | p.T229T  | c.687C>G  | Verified   | GTA | ACC | CGT | 3 | C | G |
| TCGA-25-2391 | KIAA0195   | ENST00000314256     | p.S880S  | c.2640C>G | Unverified | ATC | TCC | CTC | 3 | C | G |
| TCGA-25-2042 | KIAA0415_E | ENST00000450194     | p.T578R  | c.1733C>G | Unverified | CAC | ACG | GTC | 2 | C | G |
| TCGA-13-0760 | KIAA0564   | ENST00000379310     | p.S1450C | c.4349C>G | Verified   | aca | tct | ggt | 2 | C | G |
| TCGA-09-2051 | KIAA0889   | ENST00000237536     | p.R276G  | c.826C>G  | Unverified | CTG | CGC | AAA | 1 | C | G |
| TCGA-61-2012 | KIAA0947_E | ENST00000296564     | p.P1693R | c.5078C>G | Verified   | TCT | CCT | CCA | 2 | C | G |
| TCGA-29-1761 | KIAA1267   | ENST00000262419     | p.A440G  | c.1319C>G | Unverified | GCT | GCA | GAC | 2 | C | G |
| TCGA-24-1463 | KIAA1383   | ENST00000418460     | p.P512A  | c.1534C>G | Verified   | CCT | CCA | CAT | 1 | C | G |
| TCGA-25-2398 | KIAA1462   | ENST00000375377     | p.P713R  | c.2138C>G | Unverified | GGG | CCG | AGT | 2 | C | G |
| TCGA-23-1032 | KIAA1797   | ENST00000380249     | p.P738A  | c.2212C>G | Verified   | ATT | CCT | GAA | 1 | C | G |
| TCGA-04-1367 | KIAA2018   | ENST00000316407     | p.P185A  | c.553C>G  | Verified   | GTG | CCA | GTA | 1 | C | G |
| TCGA-13-0760 | KIAA2026_E | ENST00000399933_v61 | p.A306G  | c.917C>G  | Verified   | CCA | GCT | ATT | 2 | C | G |
| TCGA-29-1696 | KIF20B     | ENST00000260753     | p.Q1344E | c.4030C>G | Unverified | GAA | CAG | GAA | 1 | C | G |
| TCGA-29-1696 | KIF20B     | ENST00000260753     | p.Q1344E | c.4030C>G | Unverified | GAA | CAG | GAA | 1 | C | G |
| TCGA-13-0887 | KIF21B     | ENST00000332129     | p.S1019S | c.3057C>G | Verified   | ACA | TCC | GTG | 3 | C | G |
| TCGA-13-0906 | KIF5A      | ENST00000455537     | p.T938S  | c.2813C>G | Verified   | GGC | ACC | CGG | 2 | C | G |
| TCGA-13-1488 | KLHDC7A    | ENST00000400664     | p.A25G   | c.74C>G   | Verified   | TCA | GCC | GCT | 2 | C | G |
| TCGA-29-1698 | KLHDC7A    | ENST00000400664     | p.P392R  | c.1175C>G | Unverified | GAC | CCG | GGC | 2 | C | G |
| TCGA-13-1501 | KLHDC8A    | ENST00000367155     | p.A117A  | c.351C>G  | Verified   | GCC | GCC | ATG | 3 | C | G |
| TCGA-13-1501 | KLHDC8A    | ENST00000367155     | p.A117A  | c.351C>G  | Verified   | GCC | GCC | ATG | 3 | C | G |
| TCGA-24-1843 | KLHL11     | ENST00000319121     | p.L448V  | c.1342C>G | Unverified | GGA | CTA | ACA | 1 | C | G |
| TCGA-61-2109 | KLHL24     | ENST00000242810     | p.Y593*  | c.1779C>G | Unverified | AGA | TAC | AAT | 3 | C | G |
| TCGA-61-2008 | KLHL34     | ENST00000379499     | p.R553G  | c.1657C>G | Unverified | ACT | CGG | TTG | 1 | C | G |
| TCGA-04-1331 | KLHL7      | ENST00000322231     | p.A535G  | c.1604C>G | Unverified | GTT | GCC | AAC | 2 | C | G |
| TCGA-23-2078 | KLHL9      | ENST00000359039     | p.S288*  | c.863C>G  | Verified   | CAG | TCA | GAT | 2 | C | G |
| TCGA-61-1915 | KLRK1      | ENST00000240618     | p.Q85E   | c.253C>G  | Unverified | AAC | CAA | GAA | 1 | C | G |
| TCGA-23-1122 | KPTN       | ENST00000338134     | p.S345W  | c.1034C>G | Verified   | GAG | TCG | GGG | 2 | C | G |

|              |            |                 |          |           |            |     |     |     |   |   |   |
|--------------|------------|-----------------|----------|-----------|------------|-----|-----|-----|---|---|---|
| TCGA-04-1338 | KRT38      | ENST00000246646 | p.S198S  | c.594C>G  | Unverified | CGC | TCC | CTG | 3 | C | G |
| TCGA-04-1336 | KRT6A      | ENST00000330722 | p.S31C   | c.92C>G   | Verified   | CGC | TCT | GGC | 2 | C | G |
| TCGA-24-1846 | KRT7       | ENST00000331817 | p.L361V  | c.1081C>G | Unverified | GCC | CTG | CAG | 1 | C | G |
| TCGA-61-1913 | KRTCAP3    | ENST00000288873 | p.L86V   | c.256C>G  | Unverified | AAC | CTT | CTT | 1 | C | G |
| TCGA-09-1674 | KSR2       | SU_KSR2         | p.L491V  | c.1471C>G | Unverified | ctt | ctg | atc | 1 | C | G |
| TCGA-09-1674 | KSR2_ENSTC | ENST00000302438 | p.L156V  | c.466C>G  | Unverified | CTT | CTG | ATC | 1 | C | G |
| TCGA-13-0905 | L1CAM      | ENST00000370060 | p.V841V  | c.2523C>G | Verified   | CAG | GTC | AAG | 3 | C | G |
| TCGA-23-1029 | LAMA1      | ENST00000389658 | p.H881Q  | c.2643C>G | Unverified | GCC | CAC | TGT | 3 | C | G |
| TCGA-61-1907 | LAMA3      | ENST00000313654 | p.P750A  | c.2248C>G | Unverified | gat | ccg | ctg | 1 | C | G |
| TCGA-13-0913 | LAMA3      | ENST00000313654 | p.P1093P | c.3279C>G | Verified   | ctg | ccc | cag | 3 | C | G |
| TCGA-24-1846 | LAMB1      | ENST00000222399 | p.A1475G | c.4424C>G | Unverified | GAG | GCA | AAA | 2 | C | G |
| TCGA-13-1509 | LAMC1      | ENST00000258341 | p.P327R  | c.980C>G  | Verified   | CGG | CCG | TGG | 2 | C | G |
| TCGA-24-1850 | LAMC1      | ENST00000258341 | p.D169E  | c.507C>G  | Unverified | GAA | GAC | GGG | 3 | C | G |
| TCGA-13-0884 | LAMC2      | ENST00000264144 | p.P1182A | c.3544C>G | Verified   | CCC | CCA | GGC | 1 | C | G |
| TCGA-13-0903 | LARGE      | ENST00000397394 | p.D470E  | c.1410C>G | Verified   | GCA | GAC | AGC | 3 | C | G |
| TCGA-61-1907 | LARS2      | ENST00000265537 | p.I736M  | c.2208C>G | Unverified | GTC | ATC | TCT | 3 | C | G |
| TCGA-29-1762 | LAT2       | ENST00000398475 | p.A22G   | c.65C>G   | Unverified | GCA | GCC | AGT | 2 | C | G |
| TCGA-23-2078 | LBR        | ENST00000272163 | p.A94G   | c.281C>G  | Unverified | agt | gcc | cgc | 2 | C | G |
| TCGA-13-0913 | LBR        | ENST00000272163 | p.L429L  | c.1287C>G | Verified   | ctt | ctc | tat | 3 | C | G |
| TCGA-30-1857 | LCT        | ENST00000264162 | p.S101R  | c.303C>G  | Unverified | GGA | AGC | ACC | 3 | C | G |
| TCGA-61-1998 | LECT1      | ENST00000377962 | p.P305R  | c.914C>G  | Verified   | TAC | CCA | TGG | 2 | C | G |
| TCGA-29-1769 | LEPR_ENSTC | ENST00000349533 | p.S905*  | c.2714C>G | Unverified | GCA | TCA | GTG | 2 | C | G |
| TCGA-61-1906 | LETM2      | ENST00000297720 | p.A49G   | c.146C>G  | Unverified | CAA | GCC | ACA | 2 | C | G |
| TCGA-61-1906 | LETM2      | ENST00000297720 | p.A49G   | c.146C>G  | Unverified | CAA | GCC | ACA | 2 | C | G |
| TCGA-61-1906 | LETM2_ENS' | ENST00000379957 | p.A96G   | c.287C>G  | Unverified | CAA | GCC | ACA | 2 | C | G |
| TCGA-61-1906 | LETM2_ENS' | ENST00000379957 | p.A96G   | c.287C>G  | Unverified | CAA | GCC | ACA | 2 | C | G |
| TCGA-29-1777 | LGALS2     | ENST00000215886 | p.Q69E   | c.205C>G  | Unverified | GAA | CAA | CGG | 1 | C | G |
| TCGA-61-2113 | LGI1       | ENST00000371418 | p.P204R  | c.611C>G  | Verified   | CCC | CCA | GAA | 2 | C | G |
| TCGA-23-1120 | LIMCH1     | ENST00000313860 | p.T932R  | c.2795C>G | Verified   | GGA | ACA | AAC | 2 | C | G |
| TCGA-25-1326 | LIMK2      | ENST00000331728 | p.I325M  | c.975C>G  | Verified   | CAG | ATC | TTC | 3 | C | G |
| TCGA-29-1762 | LIPH       | ENST00000296252 | p.L39V   | c.115C>G  | Unverified | GGA | CTA | AAT | 1 | C | G |
| TCGA-61-1910 | LLGL2      | ENST00000392550 | p.S704W  | c.2111C>G | Unverified | cgc | tcg | gca | 2 | C | G |
| TCGA-61-1910 | LLGL2_ENST | ENST00000167462 | p.S704W  | c.2111C>G | Unverified | CGC | TCG | GCA | 2 | C | G |
| TCGA-13-1507 | LMCD1      | ENST00000157600 | p.L326V  | c.976C>G  | Verified   | GAT | CTG | GCC | 1 | C | G |

|              |           |                 |          |           |            |     |     |     |   |   |   |
|--------------|-----------|-----------------|----------|-----------|------------|-----|-----|-----|---|---|---|
| TCGA-24-1847 | LMOD3     | ENST00000420581 | p.P49P   | c.147C>G  | Unverified | CTT | CCC | GTG | 3 | C | G |
| TCGA-24-1847 | LMOD3_ENS | ENST00000420581 | p.P49P   | c.147C>G  | Unverified | CTT | CCC | GTG | 3 | C | G |
| TCGA-24-1103 | LOC51059  | ENST00000395297 | p.T1259T | c.3777C>G | Verified   | AGC | ACC | CTG | 3 | C | G |
| TCGA-23-1022 | LOC652153 | ENST00000316490 | p.P2147R | c.6440C>G | Verified   | AGT | CCC | AGT | 2 | C | G |
| TCGA-29-1766 | LOC728378 | ENST00000357462 | p.Y245*  | c.735C>G  | Unverified | CAC | TAC | GCT | 3 | C | G |
| TCGA-29-1783 | LOC81691  | ENST00000261377 | p.G76G   | c.228C>G  | Unverified | CTG | GGC | AAA | 3 | C | G |
| TCGA-24-1850 | LPHN2     | ENST00000359929 | p.R66G   | c.196C>G  | Unverified | GGT | CGG | ACG | 1 | C | G |
| TCGA-24-1850 | LPHN2_ENS | ENST00000370725 | p.R66G   | c.196C>G  | Unverified | GGT | CGG | ACG | 1 | C | G |
| TCGA-24-1469 | LPHN3     | ENST00000512091 | p.L860V  | c.2578C>G | Unverified | GTA | CTG | ATG | 1 | C | G |
| TCGA-13-0885 | LPHN3     | ENST00000512091 | p.T659R  | c.1976C>G | Unverified | ACT | ACG | AGT | 2 | C | G |
| TCGA-24-1616 | LPHN3     | ENST00000512091 | p.T783R  | c.2348C>G | Unverified | ATT | ACG | GCA | 2 | C | G |
| TCGA-24-1469 | LPHN3_ENS | ENST00000512091 | p.L860V  | c.2578C>G | Unverified | GTA | CTG | ATG | 1 | C | G |
| TCGA-13-0885 | LPHN3_ENS | ENST00000512091 | p.T659R  | c.1976C>G | Unverified | ACT | ACG | AGT | 2 | C | G |
| TCGA-24-1616 | LPHN3_ENS | ENST00000512091 | p.T783R  | c.2348C>G | Unverified | ATT | ACG | GCA | 2 | C | G |
| TCGA-24-1469 | LPHN3_ENS | ENST00000514591 | p.L860V  | c.2578C>G | Unverified | GTA | CTG | ATG | 1 | C | G |
| TCGA-13-0885 | LPHN3_ENS | ENST00000514591 | p.T659R  | c.1976C>G | Unverified | ACT | ACG | AGT | 2 | C | G |
| TCGA-24-1616 | LPHN3_ENS | ENST00000514591 | p.T783R  | c.2348C>G | Unverified | ATT | ACG | GCA | 2 | C | G |
| TCGA-61-1900 | LPIN1     | ENST00000256720 | p.S60S   | c.180C>G  | Unverified | CGC | TCC | CGA | 3 | C | G |
| TCGA-29-1776 | LPPR4     | ENST00000370185 | p.Q635E  | c.1903C>G | Unverified | ATA | CAG | ATC | 1 | C | G |
| TCGA-29-1761 | LRBA      | ENST00000357115 | p.Q2860E | c.8578C>G | Unverified | TAC | CAA | ACC | 1 | C | G |
| TCGA-10-0930 | LRIF1     | ENST00000369763 | p.Q716E  | c.2146C>G | Verified   | GAA | CAA | AGT | 1 | C | G |
| TCGA-10-0930 | LRIF1     | ENST00000369763 | p.Q716E  | c.2146C>G | Verified   | GAA | CAA | AGT | 1 | C | G |
| TCGA-13-0885 | LRIF1     | ENST00000369763 | p.T432T  | c.1296C>G | Verified   | AAT | ACC | CAG | 3 | C | G |
| TCGA-61-1906 | LRIT1     | ENST00000372105 | p.P387A  | c.1159C>G | Unverified | ATT | CCC | AAA | 1 | C | G |
| TCGA-61-1906 | LRIT1     | ENST00000372105 | p.P387A  | c.1159C>G | Unverified | ATT | CCC | AAA | 1 | C | G |
| TCGA-29-1770 | LRMP      | ENST00000354454 | p.S354*  | c.1061C>G | Unverified | ggg | tca | aag | 2 | C | G |
| TCGA-13-1408 | LRP1      | ENST00000243077 | p.N2048K | c.6144C>G | Verified   | GTC | AAC | GTC | 3 | C | G |
| TCGA-13-0906 | LRP10     | ENST00000359591 | p.R235G  | c.703C>G  | Unverified | GTG | CGC | TTC | 1 | C | G |
| TCGA-23-1114 | LRP1B     | ENST00000389484 | p.H3241D | c.9721C>G | Unverified | GCC | CAT | AAA | 1 | C | G |
| TCGA-04-1367 | LRP5      | ENST00000294304 | p.L458V  | c.1372C>G | Unverified | GAC | CTG | GAC | 1 | C | G |
| TCGA-61-1895 | LRP6      | ENST00000261349 | p.R985G  | c.2953C>G | Unverified | TCA | CGA | CAA | 1 | C | G |
| TCGA-29-1705 | LRPPRC    | ENST00000260665 | p.P636A  | c.1906C>G | Unverified | GTT | CCT | GAA | 1 | C | G |
| TCGA-13-0904 | LRRRC16B  | ENST00000342740 | p.L849L  | c.2547C>G | Verified   | GAG | CTC | TAC | 3 | C | G |
| TCGA-24-1844 | LRRRC20   | ENST00000373224 | p.N126K  | c.378C>G  | Unverified | ATC | AAC | CTG | 3 | C | G |



|              |            |                 |          |            |            |     |     |     |   |   |   |
|--------------|------------|-----------------|----------|------------|------------|-----|-----|-----|---|---|---|
| TCGA-29-1764 | LRRC37B    | ENST00000341671 | p.P252A  | c.754C>G   | Unverified | CCT | CCT | GAG | 1 | C | G |
| TCGA-13-1507 | LRRC4C     | ENST00000278198 | p.Q87E   | c.259C>G   | Verified   | AAC | CAA | ATC | 1 | C | G |
| TCGA-24-1849 | LRRC59     | ENST00000225972 | p.I283M  | c.849C>G   | Unverified | ACC | ATC | TAT | 3 | C | G |
| TCGA-61-2009 | LRRC7      | ENST00000353383 | p.R72G   | c.214C>G   | Verified   | CTA | CGA | AAA | 1 | C | G |
| TCGA-09-2051 | LRRC8A     | ENST00000372599 | p.R389G  | c.1165C>G  | Unverified | AAG | CGC | TTC | 1 | C | G |
| TCGA-04-1651 | LRRN2      | ENST00000367175 | p.R427G  | c.1279C>G  | Unverified | CCA | CGA | AGC | 1 | C | G |
| TCGA-04-1651 | LRRN2      | ENST00000367175 | p.R427G  | c.1279C>G  | Unverified | CCA | CGA | AGC | 1 | C | G |
| TCGA-61-2109 | LRRTM4     | ENST00000409088 | p.R227G  | c.679C>G   | Unverified | CCA | CGT | CTC | 1 | C | G |
| TCGA-13-1509 | LTBP4_ENST | ENST00000308370 | p.L578L  | c.1734C>G  | Verified   | CGG | CTC | AGC | 3 | C | G |
| TCGA-29-1691 | LTN1       | ENST00000361371 | p.S295C  | c.884C>G   | Unverified | GCA | TCC | AAA | 2 | C | G |
| TCGA-61-2009 | LUZP2      | ENST00000336930 | p.A175G  | c.524C>G   | Verified   | AAG | GCG | CAG | 2 | C | G |
| TCGA-29-1764 | LY75       | ENST00000263636 | p.P919A  | c.2755C>G  | Unverified | AAA | CCA | ACA | 1 | C | G |
| TCGA-04-1331 | LZTS2      | ENST00000370220 | p.S191C  | c.572C>G   | Verified   | TCC | TCC | TCT | 2 | C | G |
| TCGA-25-2393 | MACF1      | ENST00000360115 | p.L306V  | c.916C>G   | Verified   | GCC | CTA | GAA | 1 | C | G |
| TCGA-29-1781 | MACF1      | ENST00000360115 | p.H4811D | c.14431C>G | Unverified | CAC | CAT | GTC | 1 | C | G |
| TCGA-13-1507 | MACF1      | ENST00000360115 | p.A4559G | c.13676C>G | Verified   | GCA | GCT | CTC | 2 | C | G |
| TCGA-29-1781 | MACF1_ENS  | ENST00000361689 | p.H4309D | c.12925C>G | Unverified | CAC | CAT | GTC | 1 | C | G |
| TCGA-30-1855 | MACF1_ENS  | ENST00000361689 | p.Q437E  | c.1309C>G  | Unverified | ATC | CAG | AAT | 1 | C | G |
| TCGA-13-1507 | MACF1_ENS  | ENST00000361689 | p.A4057G | c.12170C>G | Verified   | GCA | GCT | CTC | 2 | C | G |
| TCGA-29-1763 | MAGEA11_E  | ENST00000355220 | p.S153C  | c.458C>G   | Unverified | TCC | TCT | ACT | 2 | C | G |
| TCGA-04-1530 | MAGEB1     | ENST00000378981 | p.S40S   | c.120C>G   | Unverified | ccc | tcc | tcc | 3 | C | G |
| TCGA-61-1740 | MAGEC2     | ENST00000247452 | p.T126S  | c.377C>G   | Unverified | GGC | ACC | TGT | 2 | C | G |
| TCGA-13-0916 | MAGI3      | ENST00000369615 | p.L897V  | c.2689C>G  | Verified   | AAA | CTG | AAA | 1 | C | G |
| TCGA-24-0979 | MAML3      | ENST00000509479 | p.P421R  | c.1262C>G  | Verified   | ACT | CCA | AAC | 2 | C | G |
| TCGA-24-2288 | MAMLD1     | NM_005491.1     | p.L315V  | c.943C>G   | Unverified | tta | ctg | tca | 1 | C | G |
| TCGA-10-0930 | MAN2A2     | ENST00000360468 | p.L310V  | c.928C>G   | Verified   | ATG | CTG | ATT | 1 | C | G |
| TCGA-10-0930 | MAN2A2     | ENST00000360468 | p.L310V  | c.928C>G   | Verified   | ATG | CTG | ATT | 1 | C | G |
| TCGA-23-1123 | MAN2B1     | ENST00000221363 | p.I100M  | c.300C>G   | Verified   | TAC | ATC | CTG | 3 | C | G |
| TCGA-23-1123 | MAN2B1     | ENST00000221363 | p.I100M  | c.300C>G   | Verified   | TAC | ATC | CTG | 3 | C | G |
| TCGA-24-1103 | MAP2       | ENST00000360351 | p.H27D   | c.79C>G    | Verified   | TCA | CAT | CCA | 1 | C | G |
| TCGA-24-1469 | MAP2       | ENST00000360351 | p.S626S  | c.1878C>G  | Verified   | GAA | TCC | CAG | 3 | C | G |
| TCGA-13-1509 | MAP3K2     | ENST00000409947 | p.T464S  | c.1391C>G  | Verified   | TAC | ACC | CGT | 2 | C | G |
| TCGA-30-1857 | MAP3K6_EN  | ENST00000374040 | p.P948R  | c.2843C>G  | Unverified | CCA | CCC | AGC | 2 | C | G |
| TCGA-30-1857 | MAP3K6_EN  | ENST00000493901 | p.P956R  | c.2867C>G  | Unverified | CCA | CCC | AGC | 2 | C | G |

|              |           |                 |          |            |            |     |     |     |   |   |   |
|--------------|-----------|-----------------|----------|------------|------------|-----|-----|-----|---|---|---|
| TCGA-61-1740 | MAPK1     | ENST00000215832 | p.L157L  | c.471C>G   | Unverified | CTG | CTC | AAC | 3 | C | G |
| TCGA-10-0930 | MARCO     | ENST00000327097 | p.G151G  | c.453C>G   | Verified   | CAA | GGC | GCC | 3 | C | G |
| TCGA-10-0930 | MARCO     | ENST00000327097 | p.G151G  | c.453C>G   | Verified   | CAA | GGC | GCC | 3 | C | G |
| TCGA-25-1326 | MARK1     | ENST00000366917 | p.S403S  | c.1209C>G  | Verified   | CAG | TCC | CCT | 3 | C | G |
| TCGA-61-2008 | MARS2     | ENST00000282276 | p.F297L  | c.891C>G   | Verified   | GAG | TTC | AAA | 3 | C | G |
| TCGA-25-2392 | MAST2     | NM_015112       | p.L91V   | c.271C>G   | Verified   | caa | ctg | agt | 1 | C | G |
| TCGA-25-2392 | MAST2_ENS | ENST00000361297 | p.L91V   | c.271C>G   | Verified   | CAA | CTG | AGT | 1 | C | G |
| TCGA-13-0920 | MATR3     | ENST00000394805 | p.S240W  | c.719C>G   | Verified   | ACC | TCG | CAT | 2 | C | G |
| TCGA-29-1775 | MATR3     | ENST00000394805 | p.D20E   | c.60C>G    | Unverified | CGT | GAC | CTG | 3 | C | G |
| TCGA-29-1775 | MATR3_ENS | ENST00000337359 | p.D20E   | c.60C>G    | Unverified | CGT | GAC | CTG | 3 | C | G |
| TCGA-13-0913 | MB21D2    | ENST00000392452 | p.T434S  | c.1301C>G  | Verified   | AGC | ACC | ACC | 2 | C | G |
| TCGA-13-0755 | MBNL1     | ENST00000282486 | p.S28*   | c.83C>G    | Verified   | TGC | TCA | CGG | 2 | C | G |
| TCGA-13-0755 | MBNL1_ENS | ENST00000545754 | p.S28*   | c.83C>G    | Verified   | TGC | TCA | CGG | 2 | C | G |
| TCGA-23-1032 | MCF2L_ENS | ENST00000375601 | p.S7C    | c.20C>G    | Unverified | GCA | TCC | CGG | 2 | C | G |
| TCGA-13-0916 | MDC1_ENS  | ENST00000376406 | p.P1655R | c.4964C>G  | Verified   | GAA | CCA | GCA | 2 | C | G |
| TCGA-24-0975 | ME3       | ENST00000393324 | p.T451R  | c.1352C>G  | Unverified | TGC | ACG | GCT | 2 | C | G |
| TCGA-10-0930 | MED12     | ENST00000374080 | p.H1508Q | c.4524C>G  | Verified   | GTG | CAC | CAG | 3 | C | G |
| TCGA-10-0930 | MED12     | ENST00000374080 | p.H1508Q | c.4524C>G  | Verified   | GTG | CAC | CAG | 3 | C | G |
| TCGA-10-0930 | MED12     | ENST00000374080 | p.H1508Q | c.4524C>G  | Verified   | GTG | CAC | CAG | 3 | C | G |
| TCGA-10-0930 | MED12     | ENST00000374080 | p.H1508Q | c.4524C>G  | Verified   | GTG | CAC | CAG | 3 | C | G |
| TCGA-10-0930 | MED12_ENS | ENST00000374080 | p.H1508Q | c.4524C>G  | Verified   | GTG | CAC | CAG | 3 | C | G |
| TCGA-10-0930 | MED12_ENS | ENST00000374080 | p.H1508Q | c.4524C>G  | Verified   | GTG | CAC | CAG | 3 | C | G |
| TCGA-13-0791 | MEF2D     | ENST00000348159 | p.T80S   | c.239C>G   | Verified   | CGC | ACC | AAC | 2 | C | G |
| TCGA-61-1915 | MEST      | ENST00000223215 | p.T169S  | c.506C>G   | Unverified | CTT | ACC | ATA | 2 | C | G |
| TCGA-29-1762 | METTL21A  | ENST00000411432 | p.H161D  | c.481C>G   | Unverified | GAA | CAT | CTC | 1 | C | G |
| TCGA-23-1031 | MFSD6     | ENST00000392328 | p.P218R  | c.653C>G   | Verified   | GCT | CCA | AAC | 2 | C | G |
| TCGA-24-2289 | MGA       | XM_031689.7     | p.V1228V | c.3684C>G  | Unverified | cca | gtc | tac | 3 | C | G |
| TCGA-13-1496 | MIA3      | ENST00000344922 | p.F388L  | c.1164C>G  | Verified   | ATC | TTC | TCT | 3 | C | G |
| TCGA-24-1103 | MKI67     | ENST00000368654 | p.L2956V | c.8866C>G  | Verified   | CCT | CTA | AAA | 1 | C | G |
| TCGA-25-1326 | MKL1      | ENST00000355630 | p.L39V   | c.115C>G   | Verified   | GAG | CTG | GTC | 1 | C | G |
| TCGA-61-1737 | MLL       | NM_005933.1     | p.L1043V | c.3127C>G  | Unverified | agt | ctt | aaa | 1 | C | G |
| TCGA-61-1737 | MLL_ENSTO | ENST00000534358 | p.L1043V | c.3127C>G  | Unverified | AGT | CTT | AAA | 1 | C | G |
| TCGA-13-1497 | MLL3      | ENST00000262189 | p.Q3499E | c.10495C>G | Verified   | ACC | CAA | ACT | 1 | C | G |
| TCGA-23-1110 | MLL3      | ENST00000262189 | p.P2101A | c.6301C>G  | Verified   | ACC | CCA | CAT | 1 | C | G |

|              |           |                 |          |            |            |     |     |     |   |   |   |
|--------------|-----------|-----------------|----------|------------|------------|-----|-----|-----|---|---|---|
| TCGA-13-0903 | MME       | ENST00000360490 | p.V199V  | c.597C>G   | Verified   | AAA | GTC | CTT | 3 | C | G |
| TCGA-25-1313 | MORC3     | ENST00000400485 | p.Q533E  | c.1597C>G  | Verified   | CCT | CAG | TCT | 1 | C | G |
| TCGA-25-1313 | MOSPD3    | ENST00000393950 | p.T235T  | c.705C>G   | Verified   | CGG | ACC | TGA | 3 | C | G |
| TCGA-24-1616 | MPEG1     | ENST00000361050 | p.A499G  | c.1496C>G  | Verified   | CCA | GCC | GGC | 2 | C | G |
| TCGA-29-1764 | MPG       | ENST00000219431 | p.L209L  | c.627C>G   | Unverified | GTC | CTC | AAG | 3 | C | G |
| TCGA-24-0975 | MPP2      | ENST00000269095 | p.Y464*  | c.1392C>G  | Unverified | CCT | TAC | GTG | 3 | C | G |
| TCGA-23-1032 | MPP3      | ENST00000398389 | p.D7E    | c.21C>G    | Unverified | GAG | GAC | TCT | 3 | C | G |
| TCGA-04-1347 | MPP4_ENST | ENST00000409474 | p.P136A  | c.406C>G   | Verified   | GAA | CCC | CTT | 1 | C | G |
| TCGA-24-1435 | MPZ       | ENST00000360451 | p.A206G  | c.617C>G   | Verified   | AGT | GCT | ATG | 2 | C | G |
| TCGA-13-0885 | MPZL1     | ENST00000359523 | p.A188G  | c.563C>G   | Verified   | CTG | GCT | GTC | 2 | C | G |
| TCGA-61-1913 | MRPL10    | ENST00000351111 | p.P56R   | c.167C>G   | Unverified | CCC | CCG | AAA | 2 | C | G |
| TCGA-30-1891 | MRPL39    | ENST00000307301 | p.R295G  | c.883C>G   | Unverified | ATA | CGA | AGA | 1 | C | G |
| TCGA-13-1488 | MRPL42    | ENST00000393126 | p.H88D   | c.262C>G   | Verified   | ACA | CAT | GAT | 1 | C | G |
| TCGA-29-1775 | MRPS23    | ENST00000313608 | p.A124G  | c.371C>G   | Unverified | AAG | GCT | TTA | 2 | C | G |
| TCGA-13-0905 | MRRF      | ENST00000344641 | p.N217K  | c.651C>G   | Verified   | ATG | AAC | AAG | 3 | C | G |
| TCGA-24-1849 | MSH4      | ENST00000263187 | p.Q377E  | c.1129C>G  | Unverified | ctt | caa | gat | 1 | C | G |
| TCGA-24-1464 | MSH6      | ENST00000234420 | p.Y1044* | c.3132C>G  | Verified   | AAT | TAC | AAG | 3 | C | G |
| TCGA-09-2056 | MT4       | ENST00000219162 | p.S55*   | c.164C>G   | Verified   | GGC | TCA | GAC | 2 | C | G |
| TCGA-20-1683 | MTA2      | ENST00000278823 | p.P384R  | c.1151C>G  | Unverified | CCA | CCT | AAC | 2 | C | G |
| TCGA-09-2051 | MTMR9     | ENST00000221086 | p.R379R  | c.1137C>G  | Unverified | cag | cgc | tgt | 3 | C | G |
| TCGA-29-1691 | MTOR      | ENST00000361445 | p.A754G  | c.2261C>G  | Unverified | agt | gcc | cgc | 2 | C | G |
| TCGA-61-1740 | MTRR      | ENST00000264668 | p.P578A  | c.1732C>G  | Unverified | GCC | CCG | TTT | 1 | C | G |
| TCGA-23-1031 | MUC16     | ENST00000397910 | p.A4167G | c.12500C>G | Verified   | CAT | GCT | ACA | 2 | C | G |
| TCGA-24-2035 | MUC17     | ENST00000306151 | p.P1849A | c.5545C>G  | Verified   | TCT | CCT | ACA | 1 | C | G |
| TCGA-13-0762 | MUC17     | ENST00000306151 | p.T1449S | c.4346C>G  | Unverified | TCA | ACT | CCT | 2 | C | G |
| TCGA-13-0762 | MUC17     | ENST00000306151 | p.T1449S | c.4346C>G  | Unverified | TCA | ACT | CCT | 2 | C | G |
| TCGA-61-1733 | MUC17     | ENST00000306151 | p.T3065T | c.9195C>G  | Unverified | AGC | ACC | CTT | 3 | C | G |
| TCGA-61-1733 | MUC17     | ENST00000306151 | p.T3065T | c.9195C>G  | Unverified | AGC | ACC | CTT | 3 | C | G |
| TCGA-23-1031 | MUC4_ENST | ENST00000405167 | p.S733S  | c.2199C>G  | Verified   | CTT | TCC | AAA | 3 | C | G |
| TCGA-61-1910 | MUC5AC    | ENST00000349637 | p.A1898A | c.5694C>G  | Unverified | ACG | GCC | ACG | 3 | C | G |
| TCGA-61-1910 | MUC5B     | ENST00000529681 | p.A1895A | c.5685C>G  | Unverified | ACG | GCC | ACG | 3 | C | G |
| TCGA-04-1337 | MUS81     | ENST00000308110 | p.Y497*  | c.1491C>G  | Unverified | CGA | TAC | AGC | 3 | C | G |
| TCGA-23-1110 | MXRA5     | ENST00000381114 | p.P877A  | c.2629C>G  | Verified   | GAA | CCT | GAA | 1 | C | G |
| TCGA-24-2289 | MXRA5     | ENST00000381114 | p.I60M   | c.180C>G   | Unverified | AGA | ATC | AAT | 3 | C | G |

|              |           |                 |          |           |            |     |     |     |   |   |   |
|--------------|-----------|-----------------|----------|-----------|------------|-----|-----|-----|---|---|---|
| TCGA-23-1122 | MXRA5_ENS | ENST00000381114 | p.L2531V | c.7591C>G | Unverified | ATC | CTG | CAG | 1 | C | G |
| TCGA-13-0885 | MYCBP2    | NM_015057.1     | p.L934V  | c.2800C>G | Verified   | cag | cta | gga | 1 | C | G |
| TCGA-30-1891 | MYH13     | ENST00000252172 | p.L954V  | c.2860C>G | Unverified | TCT | CTC | AAG | 1 | C | G |
| TCGA-30-1891 | MYH13_ENS | ENST00000570743 | p.L954V  | c.2860C>G | Unverified | TCT | CTC | AAG | 1 | C | G |
| TCGA-13-0791 | MYH4      | ENST00000255381 | p.Q1708E | c.5122C>G | Verified   | GAG | CAA | GAG | 1 | C | G |
| TCGA-09-2056 | MYLK      | NM_053025       | p.P62A   | c.184C>G  | Verified   | gag | ccc | cag | 1 | C | G |
| TCGA-04-1338 | MYO18A_EM | ENST00000527372 | p.D1722E | c.5166C>G | Verified   | GAT | GAC | ATC | 3 | C | G |
| TCGA-23-1122 | MYO18B    | ENST00000335473 | p.L1840V | c.5518C>G | Verified   | CAG | CTG | GAG | 1 | C | G |
| TCGA-13-0883 | MYO1G     | ENST00000258787 | p.L78L   | c.234C>G  | Unverified | CAT | CTC | TAT | 3 | C | G |
| TCGA-24-2024 | MYO3B     | NM_138995       | p.H1049D | c.3145C>G | Verified   | tac | cat | gtt | 1 | C | G |
| TCGA-13-0714 | MYO3B     | NM_138995       | p.A70G   | c.209C>G  | Verified   | gag | gca | gaa | 2 | C | G |
| TCGA-13-0903 | MYO5A     | ENST00000399231 | p.A109G  | c.326C>G  | Verified   | GTA | GCT | ATA | 2 | C | G |
| TCGA-23-1122 | MYO6      | ENST00000369977 | p.L1280V | c.3838C>G | Unverified | ATG | CTG | CAG | 1 | C | G |
| TCGA-23-1114 | MYOC      | ENST00000037502 | p.N469K  | c.1407C>G | Unverified | aag | aac | cgc | 3 | C | G |
| TCGA-24-1850 | MYOCD     | ENST00000343344 | p.T621S  | c.1862C>G | Unverified | CAA | ACC | AAT | 2 | C | G |
| TCGA-24-1850 | MYOCD_ENS | ENST00000425538 | p.T621S  | c.1862C>G | Unverified | CAA | ACC | AAT | 2 | C | G |
| TCGA-10-0930 | MYOM1     | ENST00000356443 | p.P1521A | c.4561C>G | Verified   | GAG | CCC | ACC | 1 | C | G |
| TCGA-10-0930 | MYOM1     | ENST00000356443 | p.P1521A | c.4561C>G | Verified   | GAG | CCC | ACC | 1 | C | G |
| TCGA-24-1470 | MYST1     | ENST00000219797 | p.R86G   | c.256C>G  | Verified   | GGC | CGA | GAG | 1 | C | G |
| TCGA-13-1481 | NACA      | ENST00000356769 | p.I128M  | c.384C>G  | Verified   | AAG | ATC | GAA | 3 | C | G |
| TCGA-09-2056 | NAF1      | ENST00000274054 | p.S216C  | c.647C>G  | Verified   | GAA | TCT | ATG | 2 | C | G |
| TCGA-10-0930 | NAF1      | ENST00000274054 | p.F373L  | c.1119C>G | Verified   | GAA | TTC | ACA | 3 | C | G |
| TCGA-10-0930 | NAF1      | ENST00000274054 | p.F373L  | c.1119C>G | Verified   | GAA | TTC | ACA | 3 | C | G |
| TCGA-23-1111 | NALCN     | ENST00000251127 | p.T1415R | c.4244C>G | Unverified | GCA | ACA | GAC | 2 | C | G |
| TCGA-13-1512 | NAPRT1    | ENST00000340490 | p.A444A  | c.1332C>G | Verified   | CCA | GCC | CAG | 3 | C | G |
| TCGA-09-2056 | NAV3      | NM_014903.3     | p.S1168R | c.3504C>G | Verified   | agc | agc | aag | 3 | C | G |
| TCGA-20-1683 | NBAS      | ENST00000281513 | p.R2106G | c.6316C>G | Unverified | CCC | CGC | ATT | 1 | C | G |
| TCGA-20-1683 | NBAS      | ENST00000281513 | p.L1467V | c.4399C>G | Unverified | GAT | CTA | GAG | 1 | C | G |
| TCGA-20-1687 | NBAS      | ENST00000281513 | p.P71A   | c.211C>G  | Unverified | AGC | CCG | GCA | 1 | C | G |
| TCGA-25-2400 | NBEAL2    | ENST00000292309 | p.P474R  | c.1421C>G | Unverified | GGT | CCA | GCT | 2 | C | G |
| TCGA-61-1907 | NCAN      | ENST00000252575 | p.A582G  | c.1745C>G | Unverified | AGG | GCC | CCT | 2 | C | G |
| TCGA-61-1907 | NCAN_ENST | ENST00000252575 | p.A582G  | c.1745C>G | Unverified | AGG | GCC | CCT | 2 | C | G |
| TCGA-24-1849 | NCEH1     | ENST00000273512 | p.P18R   | c.53C>G   | Unverified | TCG | CCC | TTT | 2 | C | G |
| TCGA-24-1849 | NCEH1_ENS | ENST00000538775 | p.P18R   | c.53C>G   | Unverified | TCG | CCC | TTT | 2 | C | G |

|              |           |                 |          |           |            |     |     |     |   |   |   |
|--------------|-----------|-----------------|----------|-----------|------------|-----|-----|-----|---|---|---|
| TCGA-23-1111 | NCF2      | ENST00000367536 | p.L392V  | c.1174C>G | Unverified | AAG | CTG | AGC | 1 | C | G |
| TCGA-10-0930 | NCKAP1L   | ENST00000293373 | p.S1016C | c.3047C>G | Verified   | CCT | TCT | TCC | 2 | C | G |
| TCGA-10-0930 | NCKAP1L   | ENST00000293373 | p.S1016C | c.3047C>G | Verified   | CCT | TCT | TCC | 2 | C | G |
| TCGA-13-0890 | NCOA3     | ENST00000371998 | p.P1198R | c.3593C>G | Verified   | aac | cct | act | 2 | C | G |
| TCGA-09-2051 | NDST1     | ENST00000261797 | p.A264A  | c.792C>G  | Unverified | CAC | GCC | ACT | 3 | C | G |
| TCGA-61-1740 | NDUFV1    | ENST00000322776 | p.H136Q  | c.408C>G  | Unverified | CCT | CAC | AAG | 3 | C | G |
| TCGA-25-2392 | NEK10     | SU_NEK10        | p.F50L   | c.150C>G  | Verified   | aac | ttc | gat | 3 | C | G |
| TCGA-24-1423 | NES       | ENST00000368223 | p.P906A  | c.2716C>G | Verified   | TCT | CCA | GAG | 1 | C | G |
| TCGA-29-1691 | NFE2L3    | ENST00000056233 | p.H459D  | c.1375C>G | Unverified | CAT | CAT | GAC | 1 | C | G |
| TCGA-29-1703 | NFU1      | ENST00000410022 | p.I217M  | c.651C>G  | Unverified | TCA | ATC | ATT | 3 | C | G |
| TCGA-20-1687 | NHLRC2    | ENST00000369301 | p.G374G  | c.1122C>G | Unverified | TCT | GGC | AAA | 3 | C | G |
| TCGA-25-2391 | NID2      | ENST00000216286 | p.A1169G | c.3506C>G | Unverified | CGT | GCT | GGT | 2 | C | G |
| TCGA-13-0905 | NISCH     | ENST00000345716 | p.L1345L | c.4035C>G | Verified   | GCC | CTC | AGC | 3 | C | G |
| TCGA-24-2262 | NLRC3     | ENST00000301749 | p.L962V  | c.2884C>G | Verified   | CAG | CTC | AAC | 1 | C | G |
| TCGA-04-1542 | NLRP3     | ENST00000391828 | p.R327G  | c.979C>G  | Verified   | gag | cgg | gga | 1 | C | G |
| TCGA-24-1470 | NLRP3     | ENST00000391828 | p.I59M   | c.177C>G  | Verified   | atg | atc | gac | 3 | C | G |
| TCGA-13-0762 | NMBR      | ENST00000258042 | p.L49L   | c.147C>G  | Unverified | TCC | CTC | TAC | 3 | C | G |
| TCGA-13-0762 | NMBR      | ENST00000258042 | p.L49L   | c.147C>G  | Unverified | TCC | CTC | TAC | 3 | C | G |
| TCGA-23-1021 | NMT2      | ENST00000378165 | p.I348M  | c.1044C>G | Verified   | GAT | ATC | AAA | 3 | C | G |
| TCGA-23-1022 | NNMT      | ENST00000299964 | p.S29C   | c.86C>G   | Verified   | GGT | TCT | AGG | 2 | C | G |
| TCGA-25-1318 | NOS2      | ENST00000313735 | p.Y451*  | c.1353C>G | Verified   | GAA | TAC | CGG | 3 | C | G |
| TCGA-25-1318 | NOS2      | ENST00000313735 | p.Y451*  | c.1353C>G | Verified   | GAA | TAC | CGG | 3 | C | G |
| TCGA-23-1116 | NOS3      | ENST00000297494 | p.P970P  | c.2910C>G | Unverified | GGC | CCC | CTG | 3 | C | G |
| TCGA-13-0761 | NOTCH1    | ENST00000277541 | p.P2417A | c.7249C>G | Unverified | CAG | CCG | CAC | 1 | C | G |
| TCGA-13-0761 | NOTCH1    | ENST00000277541 | p.P2417A | c.7249C>G | Unverified | CAG | CCG | CAC | 1 | C | G |
| TCGA-13-0761 | NOTCH1_EN | ENST00000277541 | p.P2417A | c.7249C>G | Unverified | CAG | CCG | CAC | 1 | C | G |
| TCGA-13-0761 | NOTCH1_EN | ENST00000277541 | p.P2417A | c.7249C>G | Unverified | CAG | CCG | CAC | 1 | C | G |
| TCGA-23-1124 | NOV       | ENST00000259526 | p.P175A  | c.523C>G  | Verified   | ggc | cca | gat | 1 | C | G |
| TCGA-24-2035 | NPAT      | ENST00000278612 | p.Q410E  | c.1228C>G | Verified   | AGA | CAA | GAA | 1 | C | G |
| TCGA-61-2102 | NPLOC4    | ENST00000331134 | p.S80W   | c.239C>G  | Verified   | CCC | TCG | AGC | 2 | C | G |
| TCGA-61-1915 | NPR2      | ENST00000342694 | p.A530G  | c.1589C>G | Unverified | ACA | GCC | CAT | 2 | C | G |
| TCGA-61-1915 | NPR2_ENST | ENST00000342694 | p.A530G  | c.1589C>G | Unverified | ACA | GCC | CAT | 2 | C | G |
| TCGA-09-2044 | NPRL3     | ENST00000399953 | p.S353C  | c.1058C>G | Unverified | TTC | TCC | CAC | 2 | C | G |
| TCGA-61-1914 | NRIP1     | ENST00000400199 | p.L1029V | c.3085C>G | Unverified | ggg | ctt | ttg | 1 | C | G |

|              |            |                 |          |            |            |     |     |     |   |   |   |
|--------------|------------|-----------------|----------|------------|------------|-----|-----|-----|---|---|---|
| TCGA-24-1422 | NSD1       | ENST00000439151 | p.P2420R | c.7259C>G  | Verified   | CCA | CCT | CCT | 2 | C | G |
| TCGA-61-2113 | NT5DC3     | NM_016575.1     | p.R444G  | c.1330C>G  | Verified   | ccc | cgg | agg | 1 | C | G |
| TCGA-13-1481 | NTNG1      | ENST00000370074 | p.Y286*  | c.858C>G   | Verified   | TTT | TAC | GCG | 3 | C | G |
| TCGA-13-1497 | NUAK1      | ENST00000261402 | p.V556V  | c.1668C>G  | Verified   | GGT | GTC | CCT | 3 | C | G |
| TCGA-25-1313 | NUAK2      | ENST00000367157 | p.L374L  | c.1122C>G  | Verified   | TCG | CTC | AAG | 3 | C | G |
| TCGA-61-1998 | NUP153     | ENST00000262077 | p.T695S  | c.2084C>G  | Verified   | CAG | ACT | GGA | 2 | C | G |
| TCGA-23-1114 | NUP155     | ENST00000231498 | p.L1123V | c.3367C>G  | Unverified | ATT | CTT | AGT | 1 | C | G |
| TCGA-09-2056 | NUP205     | ENST00000285968 | p.A348G  | c.1043C>G  | Verified   | ACA | GCT | CTG | 2 | C | G |
| TCGA-61-1915 | NUP210     | ENST00000254508 | p.A614G  | c.1841C>G  | Unverified | GAG | GCC | CAG | 2 | C | G |
| TCGA-29-1693 | NUP62      | ENST00000352066 | p.L458V  | c.1372C>G  | Unverified | CAC | CTG | AAC | 1 | C | G |
| TCGA-23-1124 | NWD1       | ENST00000339803 | p.T106S  | c.317C>G   | Verified   | AAG | ACC | CAC | 2 | C | G |
| TCGA-61-1733 | OAS2       | ENST00000342315 | p.V452V  | c.1356C>G  | Unverified | GAA | GTC | AGC | 3 | C | G |
| TCGA-61-1733 | OAS2       | ENST00000342315 | p.V452V  | c.1356C>G  | Unverified | GAA | GTC | AGC | 3 | C | G |
| TCGA-29-1691 | OAS3       | ENST00000228928 | p.L215V  | c.643C>G   | Unverified | TGC | CTA | CAG | 1 | C | G |
| TCGA-13-0890 | OBSCN      | SU_OBSCN.1      | p.Q1192E | c.3574C>G  | Verified   | gcc | cag | ccc | 1 | C | G |
| TCGA-13-1507 | OBSCN      | SU_OBSCN.1      | p.S1518R | c.4554C>G  | Verified   | ggg | agc | cag | 3 | C | G |
| TCGA-24-1846 | OBSCN      | SU_OBSCN.1      | p.C3181W | c.9543C>G  | Unverified | gtg | tgc | tgg | 3 | C | G |
| TCGA-29-1777 | OBSCN      | SU_OBSCN.1      | p.Y3900* | c.11700C>G | Unverified | aga | tac | agc | 3 | C | G |
| TCGA-24-1846 | OBSCN_ENS  | ENST00000284548 | p.C3127W | c.9381C>G  | Unverified | GTG | TGC | TGG | 3 | C | G |
| TCGA-29-1777 | OBSCN_ENS  | ENST00000284548 | p.Y3846* | c.11538C>G | Unverified | AGA | TAC | AGC | 3 | C | G |
| TCGA-13-0890 | OBSCN_ENS  | ENST00000359599 | p.Q1192E | c.3574C>G  | Verified   | GCC | CAG | CCC | 1 | C | G |
| TCGA-13-1507 | OBSCN_ENS  | ENST00000359599 | p.S1518R | c.4554C>G  | Verified   | GGG | AGC | CAG | 3 | C | G |
| TCGA-24-1846 | OBSCN_ENS  | ENST00000359599 | p.C3410W | c.10230C>G | Unverified | GTG | TGC | TGG | 3 | C | G |
| TCGA-29-1777 | OBSCN_ENS  | ENST00000359599 | p.Y4129* | c.12387C>G | Unverified | AGA | TAC | AGC | 3 | C | G |
| TCGA-24-1846 | OBSCN_ENS  | ENST00000570156 | p.C3311W | c.9933C>G  | Unverified | GTG | TGC | TGG | 3 | C | G |
| TCGA-29-1777 | OBSCN_ENS  | ENST00000570156 | p.Y4030* | c.12090C>G | Unverified | AGA | TAC | AGC | 3 | C | G |
| TCGA-25-2398 | OCA2       | ENST00000354638 | p.T482S  | c.1445C>G  | Verified   | GCC | ACT | GCC | 2 | C | G |
| TCGA-29-2427 | ODAM       | ENST00000396094 | p.Q137E  | c.409C>G   | Verified   | CCT | CAA | GAG | 1 | C | G |
| TCGA-24-0979 | ODZ2       | ENST00000388903 | p.N2124K | c.6372C>G  | Verified   | CAG | TAC | TTC | 3 | C | G |
| TCGA-61-1740 | ODZ4       | ENST00000278550 | p.A2096G | c.6287C>G  | Unverified | CAG | GCT | GTG | 2 | C | G |
| TCGA-61-1740 | ODZ4_ENSTI | ENST00000278550 | p.A2096G | c.6287C>G  | Unverified | CAG | GCT | GTG | 2 | C | G |
| TCGA-29-1777 | OLFM1      | ENST00000252854 | p.D94E   | c.282C>G   | Unverified | TTG | GAC | AGG | 3 | C | G |
| TCGA-13-1510 | OLFM2      | ENST00000264833 | p.T337T  | c.1011C>G  | Unverified | TAC | ACC | ACC | 3 | C | G |
| TCGA-61-1907 | OLFM3      | ENST00000370103 | p.Q152E  | c.454C>G   | Unverified | ACC | CAG | TTC | 1 | C | G |

|              |           |                 |         |           |            |     |     |     |   |   |   |
|--------------|-----------|-----------------|---------|-----------|------------|-----|-----|-----|---|---|---|
| TCGA-29-1763 | OLFM3     | ENST00000370103 | p.S5S   | c.15C>G   | Unverified | ACG | TCC | AAC | 3 | C | G |
| TCGA-61-1907 | OLFM3_ENS | ENST00000338858 | p.Q172E | c.514C>G  | Unverified | ACC | CAG | TTC | 1 | C | G |
| TCGA-24-2280 | OMD       | ENST00000375550 | p.Q374E | c.1120C>G | Unverified | ATA | CAA | CTA | 1 | C | G |
| TCGA-30-1718 | OPN3      | ENST00000366554 | p.S294W | c.881C>G  | Unverified | GTT | TCG | TAC | 2 | C | G |
| TCGA-09-2051 | OPRD1     | ENST00000234961 | p.S344R | c.1032C>G | Unverified | AGC | AGC | TTC | 3 | C | G |
| TCGA-61-2009 | OR1L8     | ENST00000304865 | p.L56V  | c.166C>G  | Verified   | CAT | CTT | CAG | 1 | C | G |
| TCGA-24-1846 | OR2Y1     | ENST00000307832 | p.R90R  | c.270C>G  | Unverified | GAC | CGC | ACC | 3 | C | G |
| TCGA-29-1690 | OR2Z1     | ENST00000324060 | p.L66L  | c.198C>G  | Unverified | CAG | CTC | TCC | 3 | C | G |
| TCGA-29-1763 | OR3A2_ENS | ENST00000408891 | p.P191A | c.571C>G  | Unverified | CTC | CCA | CAG | 1 | C | G |
| TCGA-24-1469 | OR3A4     | ENST00000323164 | p.L169V | c.505C>G  | Verified   | CCT | CTT | AAC | 1 | C | G |
| TCGA-30-1857 | OR4D1     | ENST00000268912 | p.C308W | c.924C>G  | Unverified | ATT | TGC | AGG | 3 | C | G |
| TCGA-04-1361 | OR4E2     | ENST00000408935 | p.L301L | c.903C>G  | Verified   | CAG | CTC | AGG | 3 | C | G |
| TCGA-04-1361 | OR4E2     | ENST00000408935 | p.L301L | c.903C>G  | Verified   | CAG | CTC | AGG | 3 | C | G |
| TCGA-24-1422 | OR52A4    | ENST00000380369 | p.C101W | c.303C>G  | Verified   | GCT | TGC | CTC | 3 | C | G |
| TCGA-23-1124 | OR52H1    | ENST00000322653 | p.S72S  | c.216C>G  | Verified   | CTC | TCC | ATG | 3 | C | G |
| TCGA-24-1474 | OR5AP2    | ENST00000302981 | p.I180M | c.540C>G  | Verified   | AGG | ATC | AAC | 3 | C | G |
| TCGA-24-1103 | OR5B21    | ENST00000360374 | p.L183V | c.547C>G  | Verified   | CTC | CTG | GCT | 1 | C | G |
| TCGA-29-1775 | OR5L2     | ENST00000378397 | p.L288V | c.862C>G  | Unverified | CCC | CTG | ATC | 1 | C | G |
| TCGA-23-1117 | OR5M1_ENS | ENST00000526538 | p.V194V | c.582C>G  | Verified   | CGT | GTC | AAA | 3 | C | G |
| TCGA-23-1117 | OR5M1_ENS | ENST00000526538 | p.V194V | c.582C>G  | Verified   | CGT | GTC | AAA | 3 | C | G |
| TCGA-13-1501 | OR6S1     | ENST00000320704 | p.N67K  | c.201C>G  | Verified   | GGT | AAC | CTG | 3 | C | G |
| TCGA-13-1501 | OR6S1     | ENST00000320704 | p.N67K  | c.201C>G  | Verified   | GGT | AAC | CTG | 3 | C | G |
| TCGA-23-1022 | OR7D2     | ENST00000344248 | p.L110V | c.328C>G  | Verified   | ATT | CTG | GAC | 1 | C | G |
| TCGA-25-1326 | OR8D1     | ENST00000357821 | p.H193Q | c.579C>G  | Verified   | ACA | CAC | CTC | 3 | C | G |
| TCGA-23-1029 | OR8D4     | ENST00000321355 | p.H229Q | c.687C>G  | Unverified | ATC | CAC | TCT | 3 | C | G |
| TCGA-04-1338 | OR9G4     | ENST00000302957 | p.D286E | c.858C>G  | Verified   | AGG | GAC | AAA | 3 | C | G |
| TCGA-61-2009 | ORC1      | ENST00000371568 | p.I317M | c.951C>G  | Verified   | ata | atc | ctg | 3 | C | G |
| TCGA-13-1488 | OSCP1     | ENST00000356637 | p.I362M | c.1086C>G | Verified   | CGA | ATC | ATG | 3 | C | G |
| TCGA-13-0714 | OSMR      | ENST00000274276 | p.T88S  | c.263C>G  | Verified   | ACC | ACT | GTG | 2 | C | G |
| TCGA-13-0890 | OVGP1     | ENST00000369732 | p.L24V  | c.70C>G   | Verified   | AAA | CTC | GTG | 1 | C | G |
| TCGA-29-1693 | OVOL2     | ENST00000278780 | p.T110R | c.329C>G  | Unverified | ACC | ACA | GGC | 2 | C | G |
| TCGA-13-0792 | P2RY10    | ENST00000544091 | p.T18S  | c.53C>G   | Verified   | agt | acc | agc | 2 | C | G |
| TCGA-61-1907 | PABPC4    | ENST00000372857 | p.A477G | c.1430C>G | Unverified | TTG | GCT | ATG | 2 | C | G |
| TCGA-04-1542 | PACS1     | ENST00000320580 | p.R709G | c.2125C>G | Verified   | GGG | CGG | GTG | 1 | C | G |

|              |           |                 |          |           |            |     |     |     |   |   |   |
|--------------|-----------|-----------------|----------|-----------|------------|-----|-----|-----|---|---|---|
| TCGA-13-0913 | PACS1     | ENST00000320580 | p.S59C   | c.176C>G  | Verified   | TCG | TCC | ACC | 2 | C | G |
| TCGA-04-1347 | PAK7      | ENST00000378429 | p.Q423E  | c.1267C>G | Verified   | cag | cag | ccc | 1 | C | G |
| TCGA-24-1435 | PAMR1     | ENST00000278360 | p.H149Q  | c.447C>G  | Verified   | GCT | CAC | TGT | 3 | C | G |
| TCGA-04-1331 | PAPD7     | ENST00000230859 | p.S271C  | c.812C>G  | Verified   | AGG | TCC | TAT | 2 | C | G |
| TCGA-04-1356 | PAPOLG    | ENST00000238714 | p.L167V  | c.499C>G  | Verified   | GAT | CTA | GTC | 1 | C | G |
| TCGA-25-1313 | PAPPA     | ENST00000328252 | p.L1543V | c.4627C>G | Verified   | GGT | CTC | AAG | 1 | C | G |
| TCGA-04-1342 | PAPPA     | ENST00000328252 | p.T1015R | c.3044C>G | Verified   | TAC | ACG | CCC | 2 | C | G |
| TCGA-29-1784 | PAPPA2    | ENST00000367662 | p.S256C  | c.767C>G  | Unverified | AAC | TCC | CAA | 2 | C | G |
| TCGA-29-1784 | PAPPA2_EN | ENST00000367661 | p.S256C  | c.767C>G  | Unverified | AAC | TCC | CAA | 2 | C | G |
| TCGA-24-2280 | PAPSS2    | ENST00000361175 | p.T425S  | c.1274C>G | Unverified | GAC | ACT | CGC | 2 | C | G |
| TCGA-23-2077 | PAQR5     | ENST00000395407 | p.I304M  | c.912C>G  | Verified   | ATC | ATC | TTC | 3 | C | G |
| TCGA-13-0923 | PARD3B    | ENST00000358768 | p.H1080Q | c.3240C>G | Verified   | CAG | CAC | TAC | 3 | C | G |
| TCGA-13-0885 | PARM1     | ENST00000307428 | p.P104A  | c.310C>G  | Verified   | GAC | CCC | TCA | 1 | C | G |
| TCGA-29-1777 | PARP10    | ENST00000313028 | p.P312A  | c.934C>G  | Unverified | GGT | CCC | ATG | 1 | C | G |
| TCGA-61-1740 | PARP4     | ENST00000381989 | p.T951R  | c.2852C>G | Unverified | AAC | ACA | GAC | 2 | C | G |
| TCGA-29-1705 | PASK      | ENST00000234040 | p.L351L  | c.1053C>G | Unverified | ACC | CTC | CTG | 3 | C | G |
| TCGA-29-1705 | PASK_ENST | ENST00000234040 | p.L351L  | c.1053C>G | Unverified | ACC | CTC | CTG | 3 | C | G |
| TCGA-23-1118 | PATL1     | ENST00000300146 | p.P323P  | c.969C>G  | Verified   | CCA | CCC | TCC | 3 | C | G |
| TCGA-23-1022 | PAX4      | ENST00000341640 | p.L223L  | c.669C>G  | Verified   | AAG | CTC | AAG | 3 | C | G |
| TCGA-61-1740 | PBRM1     | ENST00000337303 | p.Y963*  | c.2889C>G | Unverified | GAT | TAC | GTC | 3 | C | G |
| TCGA-61-1740 | PBRM1_EN  | ENST00000296302 | p.Y963*  | c.2889C>G | Unverified | GAT | TAC | GTC | 3 | C | G |
| TCGA-61-1740 | PBRM1_EN  | ENST00000356770 | p.Y931*  | c.2793C>G | Unverified | GAT | TAC | GTC | 3 | C | G |
| TCGA-61-2113 | PCDHA10   | ENST00000506939 | p.N450K  | c.1350C>G | Unverified | GAC | AAC | GCG | 3 | C | G |
| TCGA-61-2113 | PCDHA10_E | ENST00000505235 | p.N450K  | c.1350C>G | Unverified | GAC | AAC | GCG | 3 | C | G |
| TCGA-24-1463 | PCDHB12   | ENST00000239450 | p.F17L   | c.51C>G   | Unverified | CTT | TTC | TTT | 3 | C | G |
| TCGA-04-1342 | PCDHB14   | ENST00000239449 | p.H512Q  | c.1536C>G | Unverified | GGC | CAC | CTG | 3 | C | G |
| TCGA-30-1718 | PCDHB8    | ENST00000239444 | p.G584G  | c.1752C>G | Unverified | CCG | GGC | TAC | 3 | C | G |
| TCGA-61-1725 | PCDHGA3_E | ENST00000253812 | p.Q98E   | c.292C>G  | Unverified | GCT | CAG | ATC | 1 | C | G |
| TCGA-61-1915 | PCGF3     | ENST00000362003 | p.L24V   | c.70C>G   | Unverified | tac | ctc | atc | 1 | C | G |
| TCGA-13-1512 | PCSK2     | ENST00000262545 | p.N362K  | c.1086C>G | Verified   | AGG | AAC | CCC | 3 | C | G |
| TCGA-24-1422 | PDCD2L    | ENST00000246535 | p.R161G  | c.481C>G  | Verified   | GCT | CGG | CTC | 1 | C | G |
| TCGA-09-1674 | PDE1C     | ENST00000396184 | p.R330G  | c.988C>G  | Unverified | TTT | CGA | ACC | 1 | C | G |
| TCGA-09-1674 | PDE1C_EN  | ENST00000396191 | p.R330G  | c.988C>G  | Unverified | TTT | CGA | ACC | 1 | C | G |
| TCGA-09-1674 | PDE1C_EN  | ENST00000396193 | p.R390G  | c.1168C>G | Unverified | TTT | CGA | ACC | 1 | C | G |



|              |           |                 |          |           |            |     |     |     |   |   |   |
|--------------|-----------|-----------------|----------|-----------|------------|-----|-----|-----|---|---|---|
| TCGA-61-1740 | PDE4A     | ENST00000344979 | p.Q72E   | c.214C>G  | Unverified | AAA | CAG | CAA | 1 | C | G |
| TCGA-61-1740 | PDE4A_ENS | ENST00000293683 | p.Q285E  | c.853C>G  | Unverified | AAA | CAG | CAA | 1 | C | G |
| TCGA-61-1740 | PDE4A_ENS | ENST00000352831 | p.Q311E  | c.931C>G  | Unverified | AAA | CAG | CAA | 1 | C | G |
| TCGA-61-1740 | PDE4A_ENS | ENST00000440014 | p.Q250E  | c.748C>G  | Unverified | AAA | CAG | CAA | 1 | C | G |
| TCGA-24-2289 | PDE6A     | ENST00000255266 | p.D366E  | c.1098C>G | Unverified | GAG | GAC | TTT | 3 | C | G |
| TCGA-24-1469 | PDGFRB    | ENST00000261799 | p.R849G  | c.2545C>G | Verified   | gct | cga | gac | 1 | C | G |
| TCGA-04-1542 | PDIA4     | ENST00000286091 | p.Q575E  | c.1723C>G | Verified   | GGC | CAA | AAG | 1 | C | G |
| TCGA-61-2109 | PDLIM7    | ENST00000355841 | p.T424S  | c.1271C>G | Unverified | GAC | ACC | TGC | 2 | C | G |
| TCGA-30-1714 | PDS5B     | ENST00000315596 | p.L1297V | c.3889C>G | Unverified | CCT | CTT | GGT | 1 | C | G |
| TCGA-61-2113 | PDXK      | ENST00000291565 | p.P286R  | c.857C>G  | Unverified | agc | ccc | atg | 2 | C | G |
| TCGA-13-1501 | PER1      | ENST00000317276 | p.P403A  | c.1207C>G | Unverified | CGA | CCC | CTC | 1 | C | G |
| TCGA-13-1501 | PER1      | ENST00000317276 | p.P403A  | c.1207C>G | Unverified | CGA | CCC | CTC | 1 | C | G |
| TCGA-23-1022 | PEX3      | ENST00000367591 | p.T177R  | c.530C>G  | Verified   | CTG | ACA | GAA | 2 | C | G |
| TCGA-29-1702 | PFDN5     | ENST00000551018 | p.T95R   | c.284C>G  | Unverified | aag | aca | gct | 2 | C | G |
| TCGA-24-1845 | PFDN6_ENS | ENST00000463584 | p.L89V   | c.265C>G  | Unverified | TTT | CTG | AGG | 1 | C | G |
| TCGA-24-0975 | PFKM      | ENST00000359794 | p.V295V  | c.885C>G  | Verified   | act | gtc | ttg | 3 | C | G |
| TCGA-13-0923 | PHB2      | ENST00000535923 | p.Q258E  | c.772C>G  | Verified   | GCC | CAG | AAT | 1 | C | G |
| TCGA-13-1507 | PHEX      | ENST00000379374 | p.Q383E  | c.1147C>G | Verified   | TTT | CAG | TAT | 1 | C | G |
| TCGA-09-2056 | PI4KB     | ENST00000368875 | p.P540A  | c.1618C>G | Verified   | GAT | CCT | TCT | 1 | C | G |
| TCGA-23-1022 | PIK3C2A   | ENST00000265970 | p.H400Q  | c.1200C>G | Verified   | AAT | CAC | CGC | 3 | C | G |
| TCGA-23-1117 | PIKFYVE   | ENST00000264380 | p.L1530V | c.4588C>G | Verified   | AGA | CTG | AGA | 1 | C | G |
| TCGA-23-1117 | PIKFYVE   | ENST00000264380 | p.L1530V | c.4588C>G | Verified   | AGA | CTG | AGA | 1 | C | G |
| TCGA-13-0920 | PIP5K1A   | ENST00000349792 | p.P196A  | c.586C>G  | Verified   | ctt | cca | gga | 1 | C | G |
| TCGA-29-1785 | PIWIL1    | ENST00000245255 | p.R439G  | c.1315C>G | Unverified | CTT | CGA | GAC | 1 | C | G |
| TCGA-29-1785 | PIWIL1    | ENST00000245255 | p.R439G  | c.1315C>G | Unverified | CTT | CGA | GAC | 1 | C | G |
| TCGA-25-1326 | PIWIL3    | ENST00000332271 | p.L859V  | c.2575C>G | Verified   | AAG | CTG | GCT | 1 | C | G |
| TCGA-24-1469 | PIWIL3    | ENST00000332271 | p.A33G   | c.98C>G   | Verified   | TCA | GCT | ACA | 2 | C | G |
| TCGA-13-1509 | PKD1L1    | ENST00000289672 | p.A1968G | c.5903C>G | Verified   | TAC | GCG | TGT | 2 | C | G |
| TCGA-13-0924 | PKHD1     | ENST00000371117 | p.P875A  | c.2623C>G | Verified   | AAT | CCT | GCT | 1 | C | G |
| TCGA-29-1785 | PLA2G15   | ENST00000219345 | p.R9G    | c.25C>G   | Unverified | TAC | CGT | GTG | 1 | C | G |
| TCGA-29-1785 | PLA2G15   | ENST00000219345 | p.R9G    | c.25C>G   | Unverified | TAC | CGT | GTG | 1 | C | G |
| TCGA-29-1699 | PLA2G3    | ENST00000215885 | p.N40K   | c.120C>G  | Unverified | GGC | AAC | CCA | 3 | C | G |
| TCGA-29-1699 | PLA2G3_EN | ENST00000215885 | p.N40K   | c.120C>G  | Unverified | GGC | AAC | CCA | 3 | C | G |
| TCGA-24-1469 | PLA2G4A   | ENST00000367466 | p.H442Q  | c.1326C>G | Unverified | TCA | CAC | GAA | 3 | C | G |

|              |            |                 |          |           |            |     |     |     |   |   |   |
|--------------|------------|-----------------|----------|-----------|------------|-----|-----|-----|---|---|---|
| TCGA-13-0923 | PLAU       | ENST00000372764 | p.P216R  | c.647C>G  | Verified   | AGC | CCT | TGC | 2 | C | G |
| TCGA-24-1844 | PLCB1_ENST | ENST00000378641 | p.T1152S | c.3455C>G | Unverified | GAA | ACT | TGC | 2 | C | G |
| TCGA-25-2393 | PLCB2      | ENST00000260402 | p.H311Q  | c.933C>G  | Verified   | CTC | CAC | CAC | 3 | C | G |
| TCGA-29-1766 | PLCD3      | NM_133373.2     | p.P464P  | c.1392C>G | Unverified | aat | ccc | gag | 3 | C | G |
| TCGA-29-1766 | PLCD3_ENST | ENST00000322765 | p.P464P  | c.1392C>G | Unverified | AAT | CCC | GAG | 3 | C | G |
| TCGA-61-1740 | PLD1       | ENST00000351298 | p.R700G  | c.2098C>G | Unverified | CAG | CGC | TGG | 1 | C | G |
| TCGA-23-1117 | PLEKHA5    | ENST00000299275 | p.Q1039E | c.3115C>G | Verified   | CCT | CAA | GAT | 1 | C | G |
| TCGA-23-1117 | PLEKHA5    | ENST00000299275 | p.Q1039E | c.3115C>G | Verified   | CCT | CAA | GAT | 1 | C | G |
| TCGA-23-1117 | PLEKHA5_EM | ENST00000429027 | p.Q1200E | c.3598C>G | Verified   | CCT | CAA | GAT | 1 | C | G |
| TCGA-23-1117 | PLEKHA5_EM | ENST00000429027 | p.Q1200E | c.3598C>G | Verified   | CCT | CAA | GAT | 1 | C | G |
| TCGA-25-2392 | PLEKHA6    | ENST00000272203 | p.F82L   | c.246C>G  | Verified   | tgg | ttc | gtc | 3 | C | G |
| TCGA-24-1422 | PLEKHB2    | ENST00000234115 | p.D74E   | c.222C>G  | Verified   | AAA | GAC | TGC | 3 | C | G |
| TCGA-24-1849 | PLEKHB2    | ENST00000234115 | p.N196K  | c.588C>G  | Unverified | GAC | AAC | GAC | 3 | C | G |
| TCGA-13-1505 | PLEKHH3    | ENST00000293349 | p.P64A   | c.190C>G  | Verified   | CAG | CCA | GTG | 1 | C | G |
| TCGA-13-0905 | PLEKHM2    | ENST00000420314 | p.P871R  | c.2612C>G | Verified   | CCC | CCC | GAG | 2 | C | G |
| TCGA-61-1740 | PLSCR1     | ENST00000342435 | p.P23A   | c.67C>G   | Unverified | CCT | CCT | CAG | 1 | C | G |
| TCGA-13-0906 | PLXNB2     | XM_371474.2     | p.P1033R | c.3098C>G | Verified   | gag | ccg | cta | 2 | C | G |
| TCGA-24-1422 | PMPCB      | ENST00000249269 | p.L25V   | c.73C>G   | Verified   | AGT | CTT | CTA | 1 | C | G |
| TCGA-23-2077 | PNLIPRP3   | ENST00000369230 | p.A211G  | c.632C>G  | Unverified | GAT | GCC | AAC | 2 | C | G |
| TCGA-23-1809 | PODXL      | ENST00000378555 | p.I74M   | c.222C>G  | Unverified | GAA | ATC | TTG | 3 | C | G |
| TCGA-23-1124 | POGZ       | ENST00000271715 | p.L235V  | c.703C>G  | Verified   | ACT | CTT | ACC | 1 | C | G |
| TCGA-13-0883 | POLD1      | ENST00000440232 | p.P1102A | c.3304C>G | Unverified | CCC | CCT | GGA | 1 | C | G |
| TCGA-20-0990 | POLD2      | ENST00000406581 | p.A51G   | c.152C>G  | Verified   | TAT | GCC | CAC | 2 | C | G |
| TCGA-09-1665 | POLM       | ENST00000242248 | p.L217V  | c.649C>G  | Unverified | ctg | ctg | gag | 1 | C | G |
| TCGA-29-1761 | POLR2A     | ENST00000322644 | p.G1570G | c.4710C>G | Unverified | CCG | GGC | TCC | 3 | C | G |
| TCGA-09-2051 | POLR2I     | ENST00000221859 | p.Y7*    | c.21C>G   | Unverified | ACT | TAC | GAG | 3 | C | G |
| TCGA-13-1501 | POMGNT1    | ENST00000371984 | p.H358D  | c.1072C>G | Verified   | CAG | CAT | ACT | 1 | C | G |
| TCGA-13-1501 | POMGNT1    | ENST00000371984 | p.H358D  | c.1072C>G | Verified   | CAG | CAT | ACT | 1 | C | G |
| TCGA-04-1338 | PON3       | ENST00000265627 | p.L205V  | c.613C>G  | Verified   | GTT | CTT | TTC | 1 | C | G |
| TCGA-29-1766 | POTEF      | ENST00000409914 | p.Y245*  | c.735C>G  | Unverified | CAC | TAC | GCT | 3 | C | G |
| TCGA-29-1785 | PPL        | ENST00000345988 | p.L1209L | c.3627C>G | Unverified | CAG | CTC | CGG | 3 | C | G |
| TCGA-29-1785 | PPL        | ENST00000345988 | p.L1209L | c.3627C>G | Unverified | CAG | CTC | CGG | 3 | C | G |
| TCGA-61-2109 | PPP1R3A    | NM_002711.2     | p.G433G  | c.1299C>G | Verified   | act | ggc | agc | 3 | C | G |
| TCGA-13-0906 | PPP1R9A    | XM_374491.1     | p.F467L  | c.1401C>G | Verified   | gtt | ttc | aac | 3 | C | G |

|              |            |                 |          |           |            |     |     |     |   |   |   |
|--------------|------------|-----------------|----------|-----------|------------|-----|-----|-----|---|---|---|
| TCGA-23-1031 | PPP3CA     | ENST00000394854 | p.A280A  | c.840C>G  | Verified   | cga | gcc | cac | 3 | C | G |
| TCGA-61-1914 | PPP6R3     | ENST00000265636 | p.T613R  | c.1838C>G | Unverified | GAA | ACA | ACC | 2 | C | G |
| TCGA-61-1914 | PPP6R3_EN  | ENST00000393801 | p.T693R  | c.2078C>G | Unverified | GAA | ACA | ACC | 2 | C | G |
| TCGA-61-1737 | PPPDE1     | ENST00000302550 | p.A173G  | c.518C>G  | Unverified | GAT | GCT | GCC | 2 | C | G |
| TCGA-23-1124 | PRAMEF12   | ENST00000357726 | p.P32R   | c.95C>G   | Verified   | CTG | CCC | AGG | 2 | C | G |
| TCGA-13-0890 | PRC1       | ENST00000394249 | p.P468R  | c.1403C>G | Verified   | GCT | CCT | CGA | 2 | C | G |
| TCGA-24-1844 | PRDM15     | ENST00000269844 | p.P655A  | c.1963C>G | Unverified | GAA | CCC | ACA | 1 | C | G |
| TCGA-61-2094 | PRDM16     | ENST00000270722 | p.L737V  | c.2209C>G | Unverified | TCC | CTT | TAC | 1 | C | G |
| TCGA-24-2289 | PRDM9      | ENST00000296682 | p.H686Q  | c.2058C>G | Unverified | ACA | CAC | ACA | 3 | C | G |
| TCGA-61-1906 | PRICKLE2   | ENST00000295902 | p.P627A  | c.1879C>G | Unverified | AAC | CCC | ATT | 1 | C | G |
| TCGA-61-1906 | PRICKLE2   | ENST00000295902 | p.P627A  | c.1879C>G | Unverified | AAC | CCC | ATT | 1 | C | G |
| TCGA-29-1775 | PRICKLE2   | ENST00000295902 | p.A719G  | c.2156C>G | Unverified | AGA | GCC | AGG | 2 | C | G |
| TCGA-25-2392 | PRKAG3     | ENST00000233944 | p.L331V  | c.991C>G  | Verified   | ttc | ctg | cac | 1 | C | G |
| TCGA-61-2102 | PRKDC      | NM_006904       | p.H1133D | c.3397C>G | Verified   | gat | cac | cta | 1 | C | G |
| TCGA-29-2427 | PRMT8      | ENST00000382622 | p.I250M  | c.750C>G  | Verified   | TGC | ATC | CGG | 3 | C | G |
| TCGA-25-2392 | PROX1      | ENST00000498508 | p.T522R  | c.1565C>G | Verified   | acc | acg | agt | 2 | C | G |
| TCGA-23-1117 | PRPF40A_EM | ENST00000359961 | p.P86A   | c.256C>G  | Verified   | ATG | CCG | CAG | 1 | C | G |
| TCGA-23-1117 | PRPF40A_EM | ENST00000359961 | p.P86A   | c.256C>G  | Verified   | ATG | CCG | CAG | 1 | C | G |
| TCGA-13-1496 | PRR21      | ENST00000408934 | p.G17G   | c.51C>G   | Verified   | CAC | GGC | TTT | 3 | C | G |
| TCGA-61-1914 | PRRC2A     | ENST00000376033 | p.H226D  | c.676C>G  | Unverified | CTT | CAT | CAT | 1 | C | G |
| TCGA-13-1481 | PRRC2A     | ENST00000376033 | p.A407A  | c.1221C>G | Unverified | CCT | GCC | CCA | 3 | C | G |
| TCGA-04-1367 | PRSS21     | ENST00000005995 | p.P241R  | c.722C>G  | Verified   | GGA | CCC | TTG | 2 | C | G |
| TCGA-23-1022 | PSD4       | ENST00000245796 | p.H537Q  | c.1611C>G | Verified   | ATT | CAC | CTG | 3 | C | G |
| TCGA-61-2113 | PSG1_ENST  | ENST00000449000 | p.P158A  | c.472C>G  | Verified   | AAC | CCC | AGG | 1 | C | G |
| TCGA-29-1761 | PSMA3      | ENST00000216455 | p.G5G    | c.15C>G   | Unverified | ATC | GGC | ACT | 3 | C | G |
| TCGA-24-1422 | PSMD13     | ENST00000532097 | p.Q164E  | c.490C>G  | Verified   | TAT | CAA | ACA | 1 | C | G |
| TCGA-24-1422 | PSMD13_EN  | ENST00000431206 | p.Q166E  | c.496C>G  | Verified   | TAT | CAA | ACA | 1 | C | G |
| TCGA-24-1847 | PSME4      | NM_014614.1     | p.P110A  | c.328C>G  | Unverified | cct | cca | gaa | 1 | C | G |
| TCGA-24-1847 | PSME4_ENS  | ENST00000404125 | p.P224A  | c.670C>G  | Unverified | CCT | CCA | GAA | 1 | C | G |
| TCGA-04-1338 | PSORS1C1   | ENST00000259881 | p.L14V   | c.40C>G   | Verified   | GCT | CTC | GGC | 1 | C | G |
| TCGA-24-2288 | PSORS1C2   | ENST00000259845 | p.P58P   | c.174C>G  | Unverified | GCA | CCC | CCT | 3 | C | G |
| TCGA-61-2113 | PTAR1_ENST | ENST00000340434 | p.T359R  | c.1076C>G | Verified   | CGG | ACG | CCA | 2 | C | G |
| TCGA-29-1703 | PTCD2      | ENST00000380639 | p.R38G   | c.112C>G  | Unverified | TGC | CGC | TGC | 1 | C | G |
| TCGA-13-0760 | PTPN13     | ENST00000436978 | p.I1175M | c.3525C>G | Verified   | GTT | ATC | TCT | 3 | C | G |

|              |            |                 |          |            |            |     |     |     |   |   |   |
|--------------|------------|-----------------|----------|------------|------------|-----|-----|-----|---|---|---|
| TCGA-24-1423 | PTPN18     | ENST00000175756 | p.I74M   | c.222C>G   | Verified   | gta | atc | ctc | 3 | C | G |
| TCGA-13-0904 | PTPN21     | ENST00000328736 | p.A969A  | c.2907C>G  | Verified   | ATT | GCC | ACA | 3 | C | G |
| TCGA-23-1124 | PTPRF      | ENST00000359947 | p.N896K  | c.2688C>G  | Verified   | AAG | AAC | CGG | 3 | C | G |
| TCGA-20-0990 | PTPRG      | ENST00000474889 | p.S545R  | c.1635C>G  | Verified   | GCC | AGC | AAG | 3 | C | G |
| TCGA-23-1111 | PTPRG      | ENST00000474889 | p.S77R   | c.231C>G   | Unverified | GTC | AGC | TGT | 3 | C | G |
| TCGA-24-1850 | PTPRK      | ENST00000368226 | p.P684R  | c.2051C>G  | Unverified | gcc | ccg | ttc | 2 | C | G |
| TCGA-24-1850 | PTPRK_ENS1 | ENST00000368213 | p.P684R  | c.2051C>G  | Unverified | GCC | CCG | TTC | 2 | C | G |
| TCGA-29-1769 | PXDN       | ENST00000252804 | p.P348R  | c.1043C>G  | Unverified | CAG | CCA | CAG | 2 | C | G |
| TCGA-09-2049 | PXDN       | ENST00000252804 | p.S250S  | c.750C>G   | Verified   | ACC | TCC | GAG | 3 | C | G |
| TCGA-04-1347 | PZP        | ENST00000261336 | p.I93M   | c.279C>G   | Verified   | AGG | ATC | TCA | 3 | C | G |
| TCGA-13-1488 | Q5I0X0_HUI | ENST00000322446 | p.A155G  | c.464C>G   | Verified   | GCA | GCT | CTT | 2 | C | G |
| TCGA-61-1914 | Q8N8C9_HL  | ENST00000316673 | p.P29R   | c.86C>G    | Unverified | GCG | CCC | AAC | 2 | C | G |
| TCGA-25-2401 | Q96K91_HU  | ENST00000288841 | p.Y549*  | c.1647C>G  | Unverified | CAG | TAC | AAG | 3 | C | G |
| TCGA-13-0906 | RAB2B      | ENST00000397762 | p.T152R  | c.455C>G   | Verified   | aaa | aca | gcc | 2 | C | G |
| TCGA-23-1122 | RABEP1     | ENST00000262477 | p.A445G  | c.1334C>G  | Unverified | GGA | GCA | GAT | 2 | C | G |
| TCGA-25-2042 | RABGAP1    | NM_012197.2     | p.L28L   | c.84C>G    | Verified   | cag | ctc | tcc | 3 | C | G |
| TCGA-13-0887 | RAGE       | ENST00000361847 | p.S364C  | c.1091C>G  | Verified   | tac | tcc | agc | 2 | C | G |
| TCGA-61-2113 | RAI1       | ENST00000353383 | p.L1418V | c.4252C>G  | Unverified | AAA | CTG | TCT | 1 | C | G |
| TCGA-61-1737 | RAPGEF6_EI | ENST00000509018 | p.H1526Q | c.4578C>G  | Unverified | ACA | CAC | CTA | 3 | C | G |
| TCGA-09-2044 | RAPSN      | ENST00000298854 | p.D303E  | c.909C>G   | Verified   | CTG | GAC | AAG | 3 | C | G |
| TCGA-61-1740 | RASA1      | ENST00000274376 | p.L902V  | c.2704C>G  | Unverified | ttt | ctt | cga | 1 | C | G |
| TCGA-61-1740 | RASA1_ENS  | ENST00000456692 | p.L725V  | c.2173C>G  | Unverified | TTT | CTT | CGA | 1 | C | G |
| TCGA-23-1021 | RASA2      | ENST00000286364 | p.T136S  | c.407C>G   | Verified   | GAA | ACT | TGG | 2 | C | G |
| TCGA-29-1691 | RASGRF1    | ENST00000419573 | p.N972K  | c.2916C>G  | Unverified | acc | aac | gat | 3 | C | G |
| TCGA-04-1542 | RASSF2     | ENST00000379400 | p.Q288E  | c.862C>G   | Verified   | att | cag | aag | 1 | C | G |
| TCGA-13-1507 | RBM33      | ENST00000401878 | p.S851*  | c.2552C>G  | Verified   | CCA | TCA | CCC | 2 | C | G |
| TCGA-04-1542 | RBM6       | ENST00000266022 | p.P933A  | c.2797C>G  | Verified   | CAG | CCC | CAG | 1 | C | G |
| TCGA-13-1510 | RBM6       | ENST00000266022 | p.G702G  | c.2106C>G  | Unverified | TAT | GGC | TTT | 3 | C | G |
| TCGA-23-1110 | RDH13      | ENST00000396247 | p.Y216*  | c.648C>G   | Verified   | AAG | TAC | TTC | 3 | C | G |
| TCGA-24-1422 | RDH8       | ENST00000171214 | p.H27D   | c.79C>G    | Verified   | GCC | CAT | GAC | 1 | C | G |
| TCGA-23-1122 | REEP4      | ENST00000306306 | p.V207V  | c.621C>G   | Unverified | GCA | GTC | CCC | 3 | C | G |
| TCGA-24-2288 | REG4       | ENST00000354219 | p.L67V   | c.199C>G   | Unverified | CAC | CTG | GCA | 1 | C | G |
| TCGA-13-1507 | RELB       | ENST00000221452 | p.V372V  | c.1116C>G  | Verified   | att | gtc | gag | 3 | C | G |
| TCGA-13-0904 | RELN       | ENST00000343529 | p.D3348E | c.10044C>G | Unverified | AGT | GAC | CTG | 3 | C | G |

|              |            |                 |          |           |            |     |     |     |   |   |   |
|--------------|------------|-----------------|----------|-----------|------------|-----|-----|-----|---|---|---|
| TCGA-29-1711 | RELN       | ENST00000343529 | p.D1216E | c.3648C>G | Unverified | GAT | GAC | ATC | 3 | C | G |
| TCGA-29-1711 | RELN       | ENST00000343529 | p.D1216E | c.3648C>G | Unverified | GAT | GAC | ATC | 3 | C | G |
| TCGA-24-1423 | RFC1       | ENST00000349703 | p.L209V  | c.625C>G  | Verified   | cag | ctt | gat | 1 | C | G |
| TCGA-04-1356 | RFX3       | ENST00000358730 | p.S178C  | c.533C>G  | Verified   | AGC | TCT | CTT | 2 | C | G |
| TCGA-13-0920 | RGS12      | ENST00000344733 | p.S506C  | c.1517C>G | Unverified | gcc | tct | cct | 2 | C | G |
| TCGA-29-1703 | RGS22      | ENST00000360863 | p.H1107Q | c.3321C>G | Unverified | GAA | CAC | CGG | 3 | C | G |
| TCGA-29-1703 | RGS22_ENS  | ENST00000360863 | p.H1107Q | c.3321C>G | Unverified | GAA | CAC | CGG | 3 | C | G |
| TCGA-24-1104 | RGS8       | ENST00000258302 | p.L119V  | c.355C>G  | Verified   | AAA | CTG | GTC | 1 | C | G |
| TCGA-29-1785 | RHOBTB3    | ENST00000379982 | p.S215C  | c.644C>G  | Unverified | AAC | TCC | TTT | 2 | C | G |
| TCGA-29-1785 | RHOBTB3    | ENST00000379982 | p.S215C  | c.644C>G  | Unverified | AAC | TCC | TTT | 2 | C | G |
| TCGA-04-1361 | RIMS1      | ENST00000521978 | p.T69R   | c.206C>G  | Verified   | AAA | ACA | CCA | 2 | C | G |
| TCGA-04-1361 | RIMS1      | ENST00000521978 | p.T69R   | c.206C>G  | Verified   | AAA | ACA | CCA | 2 | C | G |
| TCGA-61-1915 | RIN2       | NM_018993.2     | p.L325V  | c.973C>G  | Unverified | cgg | ctg | gcc | 1 | C | G |
| TCGA-61-1915 | RIN2_ENST0 | ENST00000255006 | p.L374V  | c.1120C>G | Unverified | CGG | CTG | GCC | 1 | C | G |
| TCGA-61-1899 | RIPK2      | ENST00000220751 | p.P358A  | c.1072C>G | Unverified | TCT | CCT | GAA | 1 | C | G |
| TCGA-13-0920 | RIPK4      | ENST00000332512 | p.I624M  | c.1872C>G | Verified   | CTC | ATC | GAC | 3 | C | G |
| TCGA-13-0923 | RMND5B     | ENST00000313386 | p.H200D  | c.598C>G  | Verified   | ctg | cac | ttc | 1 | C | G |
| TCGA-29-1691 | RNF121     | ENST00000361756 | p.T131T  | c.393C>G  | Unverified | aca | acc | cca | 3 | C | G |
| TCGA-61-1913 | RNF157     | XM_290732.4     | p.Q855E  | c.2563C>G | Unverified | aca | caa | gat | 1 | C | G |
| TCGA-04-1347 | RNF213     | ENST00000336301 | p.F144L  | c.432C>G  | Verified   | CTT | TTC | AAG | 3 | C | G |
| TCGA-29-1783 | ROCK2      | ENST00000315872 | p.L484V  | c.1450C>G | Unverified | GAG | CTA | GAA | 1 | C | G |
| TCGA-29-1783 | ROCK2_ENS  | ENST00000315872 | p.L484V  | c.1450C>G | Unverified | GAG | CTA | GAA | 1 | C | G |
| TCGA-13-0913 | RPE65      | ENST00000262340 | p.H314D  | c.940C>G  | Verified   | CAT | CAC | ATC | 1 | C | G |
| TCGA-29-1783 | RPL30      | ENST00000287038 | p.Y31*   | c.93C>G   | Unverified | GGG | TAC | AAG | 3 | C | G |
| TCGA-23-1029 | RPL8       | ENST00000394920 | p.Q253E  | c.757C>G  | Unverified | GTG | CAG | GAG | 1 | C | G |
| TCGA-61-1907 | RPP21      | ENST00000442966 | p.R86G   | c.256C>G  | Unverified | CAG | CGC | TGG | 1 | C | G |
| TCGA-13-1488 | RPS6KA5    | ENST00000261991 | p.S263C  | c.788C>G  | Verified   | AAT | TCC | CAA | 2 | C | G |
| TCGA-13-0919 | RRAS       | ENST00000246792 | p.Y66*   | c.198C>G  | Unverified | tcc | tac | acg | 3 | C | G |
| TCGA-04-1343 | RREB1      | ENST00000379933 | p.P1539A | c.4615C>G | Verified   | AGG | CCA | TAC | 1 | C | G |
| TCGA-61-1740 | RRP7A      | ENST00000323013 | p.S222R  | c.666C>G  | Unverified | GCC | AGC | TTG | 3 | C | G |
| TCGA-23-2078 | RS1        | ENST00000379984 | p.Y166*  | c.498C>G  | Verified   | tac | tac | aag | 3 | C | G |
| TCGA-20-1687 | RSBN1L     | ENST00000334955 | p.P766A  | c.2296C>G | Unverified | GAA | CCT | GTG | 1 | C | G |
| TCGA-09-2051 | RSPH3      | ENST00000252655 | p.P42P   | c.126C>G  | Unverified | CTT | CCC | GGG | 3 | C | G |
| TCGA-25-2042 | RTN2       | ENST00000245923 | p.R223G  | c.667C>G  | Unverified | TCC | CGA | TCG | 1 | C | G |

|              |             |                 |          |           |            |     |     |     |   |   |   |
|--------------|-------------|-----------------|----------|-----------|------------|-----|-----|-----|---|---|---|
| TCGA-23-2078 | RTN4        | ENST00000357376 | p.S642C  | c.1925C>G | Verified   | ATT | TCT | AAG | 2 | C | G |
| TCGA-13-0920 | RUFY1       | ENST00000437570 | p.L348V  | c.1042C>G | Verified   | CAG | CTG | GAA | 1 | C | G |
| TCGA-13-1501 | RUFY1       | ENST00000437570 | p.T227S  | c.680C>G  | Verified   | AAG | ACT | AAC | 2 | C | G |
| TCGA-13-1501 | RUFY1       | ENST00000437570 | p.T227S  | c.680C>G  | Verified   | AAG | ACT | AAC | 2 | C | G |
| TCGA-24-2035 | RUSC1       | ENST00000292254 | p.L18V   | c.52C>G   | Verified   | GGT | CTT | CTG | 1 | C | G |
| TCGA-23-1022 | RYR1        | ENST00000359596 | p.S2948W | c.8843C>G | Verified   | GAC | TCG | TCT | 2 | C | G |
| TCGA-23-1022 | RYR2        | ENST00000366574 | p.A2936G | c.8807C>G | Verified   | GAA | GCC | CAT | 2 | C | G |
| TCGA-25-1318 | SACS        | NM_014363.3     | p.L2288V | c.6862C>G | Verified   | agt | ctc | att | 1 | C | G |
| TCGA-25-1318 | SACS        | NM_014363.3     | p.L2288V | c.6862C>G | Verified   | agt | ctc | att | 1 | C | G |
| TCGA-61-2094 | SAFB        | ENST00000292123 | p.R913G  | c.2737C>G | Unverified | act | cgc | cgc | 1 | C | G |
| TCGA-29-1761 | SAFB2       | ENST00000252542 | p.P365R  | c.1094C>G | Unverified | GTC | CCT | CCG | 2 | C | G |
| TCGA-24-1850 | SAMD9       | ENST00000379958 | p.S1185* | c.3554C>G | Unverified | AAG | TCA | AAA | 2 | C | G |
| TCGA-13-0903 | SATB1       | ENST00000338745 | p.V267V  | c.801C>G  | Verified   | cat | gtc | aat | 3 | C | G |
| TCGA-13-1498 | SCAF11      | ENST00000369367 | p.T602R  | c.1805C>G | Verified   | AAA | ACA | GAG | 2 | C | G |
| TCGA-04-1652 | SCAF8       | ENST00000367178 | p.P664R  | c.1991C>G | Unverified | ATG | CCG | GTT | 2 | C | G |
| TCGA-04-1652 | SCAF8       | ENST00000367178 | p.P664R  | c.1991C>G | Unverified | ATG | CCG | GTT | 2 | C | G |
| TCGA-61-1907 | SCN11A      | ENST00000302328 | p.F1146L | c.3438C>G | Unverified | TCC | TTC | CGG | 3 | C | G |
| TCGA-61-2012 | SCN1A       | ENST00000375405 | p.S1907C | c.5720C>G | Verified   | GTA | TCT | GCT | 2 | C | G |
| TCGA-09-2050 | SCN3A       | ENST00000283254 | p.A1768G | c.5303C>G | Verified   | ATC | GCG | GTC | 2 | C | G |
| TCGA-13-0904 | SCN9A       | ENST00000409672 | p.N365K  | c.1095C>G | Verified   | GAA | AAC | CTT | 3 | C | G |
| TCGA-24-1845 | SCRN2       | ENST00000290216 | p.T335S  | c.1004C>G | Unverified | CCC | ACT | TTT | 2 | C | G |
| TCGA-04-1530 | SCYL1       | ENST00000270176 | p.H495Q  | c.1485C>G | Unverified | ACC | CAC | AAC | 3 | C | G |
| TCGA-04-1530 | SCYL1_ENST  | ENST00000270176 | p.H495Q  | c.1485C>G | Unverified | ACC | CAC | AAC | 3 | C | G |
| TCGA-61-1915 | SDCBP2      | ENST00000381808 | p.D65E   | c.195C>G  | Unverified | GGG | GAC | CAG | 3 | C | G |
| TCGA-61-1915 | SDCBP2_ENST | ENST00000360779 | p.D150E  | c.450C>G  | Unverified | GGG | GAC | CAG | 3 | C | G |
| TCGA-61-1915 | SDCBP2_ENST | ENST00000381812 | p.D150E  | c.450C>G  | Unverified | GGG | GAC | CAG | 3 | C | G |
| TCGA-13-0755 | SEC14L3     | ENST00000215812 | p.C301W  | c.903C>G  | Verified   | GGC | TGC | GTT | 3 | C | G |
| TCGA-13-0905 | SEC22A      | ENST00000309934 | p.L132V  | c.394C>G  | Verified   | TCT | CTT | TCA | 1 | C | G |
| TCGA-23-1120 | SEC23IP     | ENST00000369075 | p.Q127E  | c.379C>G  | Verified   | TCC | CAA | GAT | 1 | C | G |
| TCGA-24-2024 | SELE        | ENST00000333360 | p.T514S  | c.1541C>G | Verified   | GGC | ACT | GTG | 2 | C | G |
| TCGA-24-1422 | SEMA4C      | ENST00000305476 | p.Y641*  | c.1923C>G | Unverified | GGC | TAC | CTT | 3 | C | G |
| TCGA-13-0890 | SENP6       | ENST00000447266 | p.T297S  | c.890C>G  | Verified   | CAC | ACT | TAT | 2 | C | G |
| TCGA-29-1691 | SERPINB2    | ENST00000299502 | p.S226W  | c.677C>G  | Unverified | aac | tcg | gct | 2 | C | G |
| TCGA-04-1651 | SERPINC1    | ENST00000367698 | p.T433S  | c.1298C>G | Unverified | gtg | act | ttc | 2 | C | G |

|              |            |                 |         |           |            |     |     |     |   |   |   |
|--------------|------------|-----------------|---------|-----------|------------|-----|-----|-----|---|---|---|
| TCGA-04-1651 | SERPINC1   | ENST00000367698 | p.T433S | c.1298C>G | Unverified | gtg | act | ttc | 2 | C | G |
| TCGA-13-0913 | SERPINH1   | ENST00000533603 | p.L80L  | c.240C>G  | Verified   | ggg | ctc | gtg | 3 | C | G |
| TCGA-13-1507 | SETDB1     | ENST00000271640 | p.S504C | c.1511C>G | Verified   | CAT | TCC | TCC | 2 | C | G |
| TCGA-10-0930 | SH2B3      | ENST00000341259 | p.S360C | c.1079C>G | Verified   | CTG | TCC | TGC | 2 | C | G |
| TCGA-10-0930 | SH2B3      | ENST00000341259 | p.S360C | c.1079C>G | Verified   | CTG | TCC | TGC | 2 | C | G |
| TCGA-25-1318 | SIAH1      | ENST00000568007 | p.T13T  | c.39C>G   | Verified   | GGT | ACC | TCG | 3 | C | G |
| TCGA-25-1318 | SIAH1      | ENST00000568007 | p.T13T  | c.39C>G   | Verified   | GGT | ACC | TCG | 3 | C | G |
| TCGA-61-1904 | SIDT2      | ENST00000324225 | p.Q161E | c.481C>G  | Unverified | GAG | CAG | TTC | 1 | C | G |
| TCGA-04-1367 | SIGLEC11   | ENST00000447370 | p.P80R  | c.239C>G  | Verified   | AGC | CCA | AAG | 2 | C | G |
| TCGA-24-2024 | SIGLEC12   | ENST00000291707 | p.L420V | c.1258C>G | Verified   | ACC | CTG | AGC | 1 | C | G |
| TCGA-04-1655 | SIK1       | ENST00000270162 | p.L781V | c.2341C>G | Unverified | GTC | CTG | GTG | 1 | C | G |
| TCGA-61-1900 | SIK3       | SU_QSK          | p.Q848E | c.2542C>G | Unverified | cag | cag | cct | 1 | C | G |
| TCGA-23-1021 | SIPA1L1    | ENST00000555818 | p.S364C | c.1091C>G | Verified   | GCT | TCC | GCA | 2 | C | G |
| TCGA-61-1998 | SIPA1L2    | ENST00000366630 | p.V226V | c.678C>G  | Verified   | ATG | GTC | CCT | 3 | C | G |
| TCGA-61-1998 | SLC10A2    | ENST00000245312 | p.Y253* | c.759C>G  | Verified   | TGG | TAC | AGG | 3 | C | G |
| TCGA-13-0923 | SLC16A4    | ENST00000369779 | p.S307C | c.920C>G  | Verified   | TGG | TCT | TTT | 2 | C | G |
| TCGA-13-0904 | SLC18A3    | ENST00000374115 | p.P515A | c.1543C>G | Verified   | CCG | CCT | GGC | 1 | C | G |
| TCGA-25-1313 | SLC1A7     | ENST00000371494 | p.A449A | c.1347C>G | Verified   | ATT | GCC | GTT | 3 | C | G |
| TCGA-23-1116 | SLC22A17   | ENST00000206544 | p.F354L | c.1062C>G | Unverified | gtc | ttc | ctg | 3 | C | G |
| TCGA-24-1844 | SLC23A3    | ENST00000295738 | p.S97C  | c.290C>G  | Unverified | ATG | TCT | ACC | 2 | C | G |
| TCGA-24-1844 | SLC23A3_EN | ENST00000455516 | p.S97C  | c.290C>G  | Unverified | ATG | TCT | ACC | 2 | C | G |
| TCGA-23-2077 | SLC25A10   | ENST00000350690 | p.V123V | c.369C>G  | Unverified | TTG | GTC | AAC | 3 | C | G |
| TCGA-23-1029 | SLC35D3    | ENST00000331858 | p.A351G | c.1052C>G | Unverified | GAG | GCA | GCA | 2 | C | G |
| TCGA-29-1775 | SLC36A4    | ENST00000326402 | p.P490R | c.1469C>G | Unverified | AGT | CCT | TTT | 2 | C | G |
| TCGA-61-1740 | SLC38A7    | ENST00000219320 | p.P231A | c.691C>G  | Unverified | ACC | CCA | GGG | 1 | C | G |
| TCGA-23-2078 | SLC43A3    | ENST00000395123 | p.A411G | c.1232C>G | Unverified | GCG | GCC | TTC | 2 | C | G |
| TCGA-29-1691 | SLC44A1    | ENST00000374720 | p.S447C | c.1340C>G | Unverified | GGA | TCT | TTC | 2 | C | G |
| TCGA-24-1422 | SLC45A4    | ENST00000024061 | p.P271A | c.811C>G  | Unverified | GAG | CCC | GAG | 1 | C | G |
| TCGA-24-2024 | SLC4A9_ENS | ENST00000506757 | p.P441R | c.1322C>G | Verified   | CAG | CCC | CTC | 2 | C | G |
| TCGA-13-0906 | SLC5A1     | ENST00000266088 | p.S446* | c.1337C>G | Unverified | CAG | TCA | GCA | 2 | C | G |
| TCGA-61-1899 | SLC5A6     | ENST00000310574 | p.L268L | c.804C>G  | Unverified | ATG | CTC | TCC | 3 | C | G |
| TCGA-30-1714 | SLC5A8     | ENST00000536262 | p.T498S | c.1493C>G | Unverified | TTT | ACT | ACT | 2 | C | G |
| TCGA-10-0930 | SLC6A3     | ENST00000270349 | p.R445G | c.1333C>G | Verified   | CAC | CGT | GAG | 1 | C | G |
| TCGA-10-0930 | SLC6A3     | ENST00000270349 | p.R445G | c.1333C>G | Verified   | CAC | CGT | GAG | 1 | C | G |

|              |          |                 |          |           |            |     |     |      |   |   |   |
|--------------|----------|-----------------|----------|-----------|------------|-----|-----|------|---|---|---|
| TCGA-24-1435 | SLCO1C1  | ENST00000266509 | p.L442V  | c.1324C>G | Verified   | TCC | CTG | TTT  | 1 | C | G |
| TCGA-23-1110 | SLCO2A1  | ENST00000310926 | p.A595A  | c.1785C>G | Unverified | TGC | GCC | TAC  | 3 | C | G |
| TCGA-20-1686 | SLCO3A1  | ENST00000318445 | p.L391V  | c.1171C>G | Unverified | CTG | CTT | GGG  | 1 | C | G |
| TCGA-10-0930 | SLIT1    | ENST00000266058 | p.Q163E  | c.487C>G  | Verified   | TTA | CAG | CTG  | 1 | C | G |
| TCGA-10-0930 | SLIT1    | ENST00000266058 | p.Q163E  | c.487C>G  | Verified   | TTA | CAG | CTG  | 1 | C | G |
| TCGA-20-1686 | SLIT2    | ENST00000504154 | p.L832V  | c.2494C>G | Unverified | TCT | CTA | CAT  | 1 | C | G |
| TCGA-13-0762 | SLIT2    | ENST00000504154 | p.P1387R | c.4160C>G | Verified   | TTG | CCC | ATC  | 2 | C | G |
| TCGA-13-0762 | SLIT2    | ENST00000504154 | p.P1387R | c.4160C>G | Verified   | TTG | CCC | ATC  | 2 | C | G |
| TCGA-61-1910 | SLX4     | ENST00000294008 | p.A1409A | c.4227C>G | Unverified | CAG | GCC | AAC  | 3 | C | G |
| TCGA-29-1768 | SMARCA1  | NM_003069.2     | p.F620L  | c.1860C>G | Unverified | gta | ttc | cggt | 3 | C | G |
| TCGA-04-1530 | SMARCAL1 | ENST00000357276 | p.P199R  | c.596C>G  | Verified   | tcc | cct | tcg  | 2 | C | G |
| TCGA-25-1318 | SMC1A    | ENST00000322213 | p.T443T  | c.1329C>G | Verified   | atc | acc | act  | 3 | C | G |
| TCGA-25-1318 | SMC1A    | ENST00000322213 | p.T443T  | c.1329C>G | Verified   | atc | acc | act  | 3 | C | G |
| TCGA-13-0900 | SMC1B    | NM_148674.1     | p.H1143Q | c.3429C>G | Verified   | gtg | cac | agt  | 3 | C | G |
| TCGA-09-1665 | SMOC2    | ENST00000354536 | p.A92A   | c.276C>G  | Verified   | GTG | GCC | GAA  | 3 | C | G |
| TCGA-24-1470 | SMYD1    | ENST00000419482 | p.L62L   | c.186C>G  | Verified   | AAG | CTC | CAT  | 3 | C | G |
| TCGA-13-1488 | SNAP47   | ENST00000366759 | p.S370*  | c.1109C>G | Verified   | TGC | TCA | GTC  | 2 | C | G |
| TCGA-23-1122 | SNPH     | ENST00000381873 | p.A375G  | c.1124C>G | Unverified | GAG | GCC | CCA  | 2 | C | G |
| TCGA-61-1740 | SNTA1    | ENST00000217381 | p.L113V  | c.337C>G  | Unverified | ATT | CTC | ATT  | 1 | C | G |
| TCGA-61-1907 | SNUPN    | ENST00000308588 | p.H312D  | c.934C>G  | Unverified | GAG | CAC | AAG  | 1 | C | G |
| TCGA-13-0795 | SNW1     | ENST00000261531 | p.Q194E  | c.580C>G  | Verified   | aaa | cag | agg  | 1 | C | G |
| TCGA-29-1784 | SNX1     | ENST00000559844 | p.L351V  | c.1051C>G | Unverified | agt | cta | gcc  | 1 | C | G |
| TCGA-09-1665 | SNX27    | ENST00000368843 | p.N206K  | c.618C>G  | Verified   | CAG | AAC | CTG  | 3 | C | G |
| TCGA-61-1907 | SOCS5    | ENST00000306503 | p.L108V  | c.322C>G  | Unverified | aga | ctt | gca  | 1 | C | G |
| TCGA-29-1769 | SORCS3   | ENST00000369701 | p.I213M  | c.639C>G  | Unverified | CTT | ATC | CTG  | 3 | C | G |
| TCGA-04-1530 | SORT1    | ENST00000256637 | p.A762G  | c.2285C>G | Unverified | CTG | GCC | ATC  | 2 | C | G |
| TCGA-04-1362 | SOS1     | ENST00000426016 | p.L1231V | c.3691C>G | Verified   | cca | cta | cat  | 1 | C | G |
| TCGA-25-2400 | SOS1     | ENST00000426016 | p.P1183R | c.3548C>G | Verified   | att | cct | cct  | 2 | C | G |
| TCGA-30-1856 | SOSTDC1  | ENST00000307068 | p.P12A   | c.34C>G   | Unverified | CTT | CCC | CTT  | 1 | C | G |
| TCGA-23-1120 | SOX13    | ENST00000367204 | p.P497R  | c.1490C>G | Unverified | CGG | CCC | AAG  | 2 | C | G |
| TCGA-61-2095 | SOX13    | ENST00000367204 | p.N105K  | c.315C>G  | Unverified | TTC | AAC | CGA  | 3 | C | G |
| TCGA-24-2267 | SOX5     | ENST00000451604 | p.P19R   | c.56C>G   | Verified   | cga | cca | gcc  | 2 | C | G |
| TCGA-13-0760 | SP110    | ENST00000258381 | p.P174A  | c.520C>G  | Verified   | TCG | CCC | AGC  | 1 | C | G |
| TCGA-25-2401 | SP4      | ENST00000222584 | p.Q415E  | c.1243C>G | Verified   | CAA | CAG | ATC  | 1 | C | G |



|              |            |                 |          |            |            |     |     |     |   |   |   |
|--------------|------------|-----------------|----------|------------|------------|-----|-----|-----|---|---|---|
| TCGA-25-1326 | SPAG4      | ENST00000374273 | p.P129R  | c.386C>G   | Unverified | CCC | CCG | CGG | 2 | C | G |
| TCGA-24-1435 | SPANXN3    | ENST00000370503 | p.S134C  | c.401C>G   | Verified   | GGA | TCT | TCA | 2 | C | G |
| TCGA-13-0900 | SPECC1     | ENST00000261503 | p.T144R  | c.431C>G   | Verified   | CCT | ACG | AAA | 2 | C | G |
| TCGA-13-1489 | SPOCD1     | ENST00000360482 | p.P579A  | c.1735C>G  | Verified   | GGC | CCA | ATG | 1 | C | G |
| TCGA-25-2401 | SPRED1     | ENST00000299084 | p.V246V  | c.738C>G   | Verified   | ATT | GTC | AGA | 3 | C | G |
| TCGA-30-1718 | SPRYD5_ENS | ENST00000327733 | p.D29E   | c.87C>G    | Unverified | ATA | GAC | TGT | 3 | C | G |
| TCGA-61-2102 | SPTAN1     | ENST00000372731 | p.L1157V | c.3469C>G  | Verified   | GAC | CTG | GAG | 1 | C | G |
| TCGA-13-0904 | SPTB       | ENST00000389722 | p.L728V  | c.2182C>G  | Verified   | CAG | CTG | AAG | 1 | C | G |
| TCGA-61-1733 | SRCAP      | ENST00000262518 | p.P1878R | c.5633C>G  | Unverified | CCC | CCA | CCA | 2 | C | G |
| TCGA-61-1733 | SRCAP      | ENST00000262518 | p.P1878R | c.5633C>G  | Unverified | CCC | CCA | CCA | 2 | C | G |
| TCGA-24-2280 | SRCAP      | ENST00000262518 | p.F2032L | c.6096C>G  | Unverified | CAG | TTC | CCT | 3 | C | G |
| TCGA-25-1326 | SRCAP      | ENST00000262518 | p.V990V  | c.2970C>G  | Verified   | CCA | GTC | AAG | 3 | C | G |
| TCGA-29-1784 | SREBF2     | ENST00000361204 | p.A373G  | c.1118C>G  | Unverified | AAG | GCC | ATT | 2 | C | G |
| TCGA-13-0885 | SREK1IP1   | ENST00000513458 | p.T47R   | c.140C>G   | Verified   | AGT | ACA | AGT | 2 | C | G |
| TCGA-20-0990 | SRGAP1     | ENST00000355086 | p.S938C  | c.2813C>G  | Verified   | AGG | TCC | ACG | 2 | C | G |
| TCGA-61-2095 | SSH2       | ENST00000269033 | p.H212D  | c.634C>G   | Unverified | AGC | CAT | ATC | 1 | C | G |
| TCGA-24-1435 | ST3GAL3    | ENST00000361746 | p.P117A  | c.349C>G   | Verified   | CAC | CCT | CTA | 1 | C | G |
| TCGA-30-1857 | STK10      | ENST00000176763 | p.T341S  | c.1022C>G  | Unverified | CAT | ACT | CAG | 2 | C | G |
| TCGA-61-1910 | STK16_ENST | ENST00000409638 | p.L247V  | c.739C>G   | Unverified | GCC | CTT | GCT | 1 | C | G |
| TCGA-25-1326 | STK24      | ENST00000376547 | p.A322G  | c.965C>G   | Verified   | GAC | GCG | GAA | 2 | C | G |
| TCGA-13-0755 | STK31      | ENST00000355870 | p.S183C  | c.548C>G   | Verified   | ACC | TCT | GAA | 2 | C | G |
| TCGA-13-0714 | STK32C     | ENST00000298630 | p.Y256*  | c.768C>G   | Unverified | CCG | TAC | ATG | 3 | C | G |
| TCGA-25-2392 | STRADA     | ENST00000336174 | p.H231D  | c.691C>G   | Verified   | GTC | CAC | GAT | 1 | C | G |
| TCGA-61-1740 | STX12      | ENST00000373943 | p.T275R  | c.824C>G   | Unverified | AAA | ACG | AAG | 2 | C | G |
| TCGA-09-2056 | SULF1      | ENST00000260128 | p.F168L  | c.504C>G   | Verified   | CGC | TTC | TAT | 3 | C | G |
| TCGA-36-1577 | SULF2      | ENST00000359930 | p.N640K  | c.1920C>G  | Unverified | cag | aac | aaa | 3 | C | G |
| TCGA-20-1687 | SUPT7L     | ENST00000337768 | p.L158L  | c.474C>G   | Unverified | CTC | CTC | TAC | 3 | C | G |
| TCGA-04-1338 | SVEP1      | ENST00000401783 | p.A807G  | c.2420C>G  | Verified   | GCA | GCT | CGT | 2 | C | G |
| TCGA-29-1785 | SVEP1      | ENST00000401783 | p.A608G  | c.1823C>G  | Unverified | CCA | GCT | TTC | 2 | C | G |
| TCGA-29-1785 | SVEP1      | ENST00000401783 | p.A608G  | c.1823C>G  | Unverified | CCA | GCT | TTC | 2 | C | G |
| TCGA-24-2289 | SVIL       | ENST00000355867 | p.L124V  | c.370C>G   | Unverified | ACT | CTG | GAT | 1 | C | G |
| TCGA-13-0924 | SVIL       | ENST00000355867 | p.V1426V | c.4278C>G  | Verified   | AGC | GTC | AAC | 3 | C | G |
| TCGA-30-1718 | SYNE1      | ENST00000265368 | p.Q3961E | c.11881C>G | Unverified | ACC | CAG | CAA | 1 | C | G |
| TCGA-30-1718 | SYNE1_ENST | ENST00000265368 | p.Q3961E | c.11881C>G | Unverified | ACC | CAG | CAA | 1 | C | G |

|              |          |                 |          |           |            |     |     |     |   |   |   |
|--------------|----------|-----------------|----------|-----------|------------|-----|-----|-----|---|---|---|
| TCGA-13-1497 | SYNJ1    | NM_003895.2     | p.V355V  | c.1065C>G | Verified   | caa | gtc | cag | 3 | C | G |
| TCGA-04-1367 | SYNPO2L  | ENST00000372873 | p.R544G  | c.1630C>G | Verified   | AGC | CGT | GCG | 1 | C | G |
| TCGA-24-1470 | SYT13    | ENST00000020926 | p.H252Q  | c.756C>G  | Verified   | CGT | CAC | AGC | 3 | C | G |
| TCGA-04-1651 | SYT3     | ENST00000338916 | p.S196C  | c.587C>G  | Unverified | GGC | TCT | GGG | 2 | C | G |
| TCGA-04-1651 | SYT3     | ENST00000338916 | p.S196C  | c.587C>G  | Unverified | GGC | TCT | GGG | 2 | C | G |
| TCGA-24-1616 | SYT6     | ENST00000369546 | p.P314R  | c.941C>G  | Verified   | GAT | CCC | TAT | 2 | C | G |
| TCGA-24-1616 | SYT6     | ENST00000369546 | p.S410C  | c.1229C>G | Verified   | CAC | TCC | TTG | 2 | C | G |
| TCGA-24-2288 | TACC2    | ENST00000369005 | p.P1934A | c.5800C>G | Unverified | ACT | CCC | TCC | 1 | C | G |
| TCGA-13-0920 | TADA1    | ENST00000367874 | p.L151V  | c.451C>G  | Verified   | CAG | CTT | GAA | 1 | C | G |
| TCGA-24-0975 | TAF1     | ENST00000373790 | p.S319C  | c.956C>G  | Unverified | gag | tcc | aaa | 2 | C | G |
| TCGA-13-0890 | TAF1     | ENST00000373790 | p.D1416E | c.4248C>G | Verified   | aag | gac | tac | 3 | C | G |
| TCGA-24-1846 | TAF1L    | ENST00000242310 | p.L1148V | c.3442C>G | Unverified | gaa | cta | cgg | 1 | C | G |
| TCGA-13-0923 | TAF4     | ENST00000252996 | p.R459G  | c.1375C>G | Verified   | GTC | CGA | AGT | 1 | C | G |
| TCGA-10-0930 | TAF5     | ENST00000369839 | p.L515V  | c.1543C>G | Verified   | AGT | CTT | ATA | 1 | C | G |
| TCGA-10-0930 | TAF5     | ENST00000369839 | p.L515V  | c.1543C>G | Verified   | AGT | CTT | ATA | 1 | C | G |
| TCGA-13-0900 | TAGAP    | ENST00000367066 | p.R203G  | c.607C>G  | Verified   | CCC | CGG | CCC | 1 | C | G |
| TCGA-24-2288 | TANC1    | ENST00000263635 | p.L1826V | c.5476C>G | Unverified | CAT | CTG | TAC | 1 | C | G |
| TCGA-25-1318 | TARS     | ENST00000265112 | p.H464D  | c.1390C>G | Verified   | GCT | CAC | ATA | 1 | C | G |
| TCGA-25-1318 | TARS     | ENST00000265112 | p.H464D  | c.1390C>G | Verified   | GCT | CAC | ATA | 1 | C | G |
| TCGA-04-1367 | TAS2R50  | ENST00000506868 | p.L12V   | c.34C>G   | Verified   | ATT | CTA | ATA | 1 | C | G |
| TCGA-61-2102 | TBC1D4   | ENST00000377636 | p.L994V  | c.2980C>G | Verified   | AAC | CTC | CTG | 1 | C | G |
| TCGA-24-2024 | TBCA     | ENST00000380377 | p.P65R   | c.194C>G  | Verified   | ATC | CCA | GAT | 2 | C | G |
| TCGA-04-1331 | TBL1XR1  | ENST00000430069 | p.T94R   | c.281C>G  | Verified   | caa | aca | aga | 2 | C | G |
| TCGA-13-1481 | TBXAS1   | ENST00000263552 | p.I179M  | c.537C>G  | Verified   | GAC | ATC | CAG | 3 | C | G |
| TCGA-29-1761 | TCEB1    | ENST00000284811 | p.S24C   | c.71C>G   | Unverified | TCA | TCT | GAT | 2 | C | G |
| TCGA-24-2280 | TCERG1   | ENST00000296702 | p.P988A  | c.2962C>G | Unverified | GAT | CCT | CGA | 1 | C | G |
| TCGA-13-0884 | TCF20    | ENST00000359486 | p.T1831S | c.5492C>G | Verified   | ACC | ACT | TCA | 2 | C | G |
| TCGA-13-1507 | TCF20    | ENST00000359486 | p.A1060A | c.3180C>G | Verified   | CTG | GCC | TCT | 3 | C | G |
| TCGA-24-2267 | TCF20    | ENST00000359486 | p.G522G  | c.1566C>G | Verified   | GGA | GGC | TGC | 3 | C | G |
| TCGA-13-1488 | TCTEX1D2 | ENST00000325318 | p.F140L  | c.420C>G  | Verified   | TGT | TTC | TAC | 3 | C | G |
| TCGA-23-1122 | TDRD6    | ENST00000316081 | p.A1042A | c.3126C>G | Verified   | CTT | GCC | AAG | 3 | C | G |
| TCGA-13-0893 | TESK1    | ENST00000336395 | p.A160G  | c.479C>G  | Verified   | ATT | GCC | CGA | 2 | C | G |
| TCGA-24-1104 | TESK2    | NM_007170       | p.R469R  | c.1407C>G | Verified   | cca | cgc | cta | 3 | C | G |
| TCGA-36-1577 | TEX10    | ENST00000374902 | p.R703G  | c.2107C>G | Verified   | CTT | CGA | GGA | 1 | C | G |

|              |           |                    |          |           |            |     |     |     |   |   |   |
|--------------|-----------|--------------------|----------|-----------|------------|-----|-----|-----|---|---|---|
| TCGA-61-2094 | TEX15     | ENST00000256246    | p.S1842C | c.5525C>G | Unverified | GAC | TCT | CCT | 2 | C | G |
| TCGA-29-1695 | TFAP2D    | ENST00000008391    | p.T400R  | c.1199C>G | Unverified | CAA | ACA | GTT | 2 | C | G |
| TCGA-61-1900 | TFB2M     | ENST00000366514    | p.Q353E  | c.1057C>G | Unverified | ATG | CAA | ATA | 1 | C | G |
| TCGA-24-1423 | TFRC      | ENST00000360110    | p.T658R  | c.1973C>G | Verified   | ACA | ACA | GAT | 2 | C | G |
| TCGA-13-1499 | TGM3      | ENST00000381458    | p.T464R  | c.1391C>G | Verified   | AAC | ACG | CCA | 2 | C | G |
| TCGA-13-0916 | TGM6      | ENST00000202625    | p.V529V  | c.1587C>G | Verified   | AGG | GTC | AAC | 3 | C | G |
| TCGA-23-1110 | TGS1      | ENST00000260129    | p.A726G  | c.2177C>G | Verified   | ATT | GCC | CTT | 2 | C | G |
| TCGA-25-1326 | THEMIS    | ENST00000368248    | p.L184V  | c.550C>G  | Verified   | ACT | CTA | AAG | 1 | C | G |
| TCGA-23-2077 | THOC2     | OTTHUMT00000058153 | p.T896R  | c.2687C>G | Verified   | atc | aca | aaa | 2 | C | G |
| TCGA-09-1674 | THOC6     | ENST00000326266    | p.S338C  | c.1013C>G | Unverified | TTC | TCC | CTG | 2 | C | G |
| TCGA-30-1856 | THSD7B    | ENST00000272643    | p.T1302S | c.3905C>G | Unverified | GTG | ACC | CCC | 2 | C | G |
| TCGA-30-1856 | THSD7B_EN | ENST00000413152    | p.T1271S | c.3812C>G | Unverified | GTG | ACC | CCC | 2 | C | G |
| TCGA-13-1408 | TIAM1     | ENST00000286827    | p.F515L  | c.1545C>G | Verified   | GTC | TTC | TGC | 3 | C | G |
| TCGA-61-1913 | TIMM50    | ENST00000314349    | p.R102R  | c.306C>G  | Unverified | CAG | CGC | AAG | 3 | C | G |
| TCGA-23-1124 | TIMMDC1   | ENST00000494664    | p.D73E   | c.219C>G  | Verified   | AAG | GAC | CTT | 3 | C | G |
| TCGA-61-2094 | TINAG     | ENST00000259782    | p.H39D   | c.115C>G  | Unverified | AAT | CAC | ACC | 1 | C | G |
| TCGA-09-2049 | TJP1      | ENST00000346128    | p.Q1724E | c.5170C>G | Verified   | TGG | CAA | AAC | 1 | C | G |
| TCGA-13-0886 | TKTL1     | ENST00000369915    | p.A491G  | c.1472C>G | Unverified | TTA | GCA | GCT | 2 | C | G |
| TCGA-30-1855 | TLL1      | ENST00000061240    | p.P347A  | c.1039C>G | Unverified | TGT | CCA | GCA | 1 | C | G |
| TCGA-24-1845 | TLN2      | ENST00000306829    | p.P2264A | c.6790C>G | Unverified | ACC | CCA | GAA | 1 | C | G |
| TCGA-04-1331 | TMEM132A  | ENST00000005286    | p.P717R  | c.2150C>G | Unverified | CTG | CCA | GCT | 2 | C | G |
| TCGA-24-2280 | TMEM146   | ENST00000381624    | p.A622G  | c.1865C>G | Unverified | TCG | GCC | ATG | 2 | C | G |
| TCGA-29-1776 | TMEM63B   | ENST00000259746    | p.P530R  | c.1589C>G | Unverified | CTA | CCC | TCG | 2 | C | G |
| TCGA-29-1777 | TMEM74    | ENST00000297459    | p.P50A   | c.148C>G  | Unverified | acc | cca | aga | 1 | C | G |
| TCGA-24-2289 | TMEM87B   | ENST00000283206    | p.L329V  | c.985C>G  | Unverified | CTT | CTA | TAC | 1 | C | G |
| TCGA-20-0991 | TMOD3     | ENST00000308580    | p.Q161E  | c.481C>G  | Verified   | GAC | CAA | GAA | 1 | C | G |
| TCGA-29-1762 | TMPRSS4   | ENST00000437212    | p.N255K  | c.765C>G  | Unverified | TTC | AAC | TGG | 3 | C | G |
| TCGA-13-1510 | TNFAIP3   | ENST00000237289    | p.L421V  | c.1261C>G | Unverified | aag | ctg | aac | 1 | C | G |
| TCGA-04-1337 | TNFRSF1A  | ENST00000162749    | p.F144L  | c.432C>G  | Unverified | tgc | ttc | aat | 3 | C | G |
| TCGA-24-1422 | TNFSF9    | ENST00000245817    | p.L124V  | c.370C>G  | Unverified | ggc | ctg | agc | 1 | C | G |
| TCGA-04-1356 | TNIP1     | ENST00000315050    | p.A102A  | c.306C>G  | Verified   | ACA | GCC | CCT | 3 | C | G |
| TCGA-24-2288 | TNNI3K    | ENST00000326637    | p.Q291E  | c.871C>G  | Unverified | atc | caa | ata | 1 | C | G |
| TCGA-23-2078 | TNR       | ENST00000367674    | p.T113S  | c.338C>G  | Verified   | GTC | ACC | TTT | 2 | C | G |
| TCGA-25-2401 | TNRC18_EN | ENST00000430969    | p.Y1494* | c.4482C>G | Unverified | CAG | TAC | AAG | 3 | C | G |

|              |            |                 |          |           |            |     |     |     |   |   |   |
|--------------|------------|-----------------|----------|-----------|------------|-----|-----|-----|---|---|---|
| TCGA-24-2288 | TOP1       | ENST00000361337 | p.G583G  | c.1749C>G | Unverified | gag | ggc | ttg | 3 | C | G |
| TCGA-13-0919 | TOP2A      | ENST00000423485 | p.Q355E  | c.1063C>G | Verified   | cat | cag | gtg | 1 | C | G |
| TCGA-13-0919 | TOP2A      | ENST00000423485 | p.G307G  | c.921C>G  | Verified   | aaa | ggc | ttt | 3 | C | G |
| TCGA-61-2008 | TOR1AIP2   | ENST00000367612 | p.A138A  | c.414C>G  | Verified   | GTG | GCC | CTC | 3 | C | G |
| TCGA-29-1699 | TP53       | ENST00000269305 | p.R175G  | c.523C>G  | Unverified | AGG | CGC | TGC | 1 | C | G |
| TCGA-61-2094 | TP53       | ENST00000269305 | p.L130V  | c.388C>G  | Verified   | GCC | CTC | AAC | 1 | C | G |
| TCGA-13-0913 | TP53       | ENST00000269305 | p.P278R  | c.833C>G  | Verified   | TGT | CCT | GGG | 2 | C | G |
| TCGA-13-1481 | TP53       | ENST00000269305 | p.P177R  | c.530C>G  | Verified   | TGC | CCC | CAC | 2 | C | G |
| TCGA-30-1714 | TP53       | ENST00000269305 | p.P151R  | c.452C>G  | Unverified | ACA | CCC | CCG | 2 | C | G |
| TCGA-29-1699 | TP53_ENSTC | ENST00000269305 | p.R175G  | c.523C>G  | Unverified | AGG | CGC | TGC | 1 | C | G |
| TCGA-13-1481 | TP53_ENSTC | ENST00000269305 | p.P177R  | c.530C>G  | Verified   | TGC | CCC | CAC | 2 | C | G |
| TCGA-30-1714 | TP53_ENSTC | ENST00000269305 | p.P151R  | c.452C>G  | Unverified | ACA | CCC | CCG | 2 | C | G |
| TCGA-29-1699 | TP53_ENSTC | ENST00000413465 | p.R175G  | c.523C>G  | Unverified | AGG | CGC | TGC | 1 | C | G |
| TCGA-13-1481 | TP53_ENSTC | ENST00000413465 | p.P177R  | c.530C>G  | Verified   | TGC | CCC | CAC | 2 | C | G |
| TCGA-30-1714 | TP53_ENSTC | ENST00000413465 | p.P151R  | c.452C>G  | Unverified | ACA | CCC | CCG | 2 | C | G |
| TCGA-29-1699 | TP53_ENSTC | ENST00000414315 | p.R43G   | c.127C>G  | Unverified | AGG | CGC | TGC | 1 | C | G |
| TCGA-13-1481 | TP53_ENSTC | ENST00000414315 | p.P45R   | c.134C>G  | Verified   | TGC | CCC | CAC | 2 | C | G |
| TCGA-30-1714 | TP53_ENSTC | ENST00000414315 | p.P19R   | c.56C>G   | Unverified | ACA | CCC | CCG | 2 | C | G |
| TCGA-29-1699 | TP53_ENSTC | ENST00000545858 | p.R82G   | c.244C>G  | Unverified | AGG | CGC | TGC | 1 | C | G |
| TCGA-13-1481 | TP53_ENSTC | ENST00000545858 | p.P84R   | c.251C>G  | Verified   | TGC | CCC | CAC | 2 | C | G |
| TCGA-30-1714 | TP53_ENSTC | ENST00000545858 | p.P58R   | c.173C>G  | Unverified | ACA | CCC | CCG | 2 | C | G |
| TCGA-13-1505 | TPH2       | ENST00000333850 | p.T316R  | c.947C>G  | Verified   | GAC | ACA | TGC | 2 | C | G |
| TCGA-25-1326 | TPO        | ENST00000345913 | p.L11V   | c.31C>G   | Verified   | acg | ctg | gtt | 1 | C | G |
| TCGA-24-1850 | TPPP       | ENST00000360578 | p.A148G  | c.443C>G  | Unverified | AAG | GCG | CCC | 2 | C | G |
| TCGA-24-1435 | TRAD       | ENST00000291478 | p.P801A  | c.2401C>G | Verified   | CGG | CCA | AAG | 1 | C | G |
| TCGA-24-1435 | TRAIP      | ENST00000331456 | p.P47A   | c.139C>G  | Verified   | tgc | cca | cag | 1 | C | G |
| TCGA-25-1313 | TRAPPC8    | ENST00000283351 | p.L1102V | c.3304C>G | Verified   | ATG | CTA | GTC | 1 | C | G |
| TCGA-24-1422 | TRAPPC8    | ENST00000283351 | p.A1160G | c.3479C>G | Verified   | AAG | GCA | ATA | 2 | C | G |
| TCGA-25-2392 | TRIB3      | ENST00000217233 | p.P9A    | c.25C>G   | Unverified | GCT | CCT | GCG | 1 | C | G |
| TCGA-30-1855 | TRIM33     | NM_015906       | p.L822V  | c.2464C>G | Unverified | aac | ctg | cat | 1 | C | G |
| TCGA-13-0755 | TRIM46     | ENST00000334634 | p.Q589E  | c.1765C>G | Verified   | acc | cag | ggc | 1 | C | G |
| TCGA-24-1431 | TRIM54     | NM_032546.2     | p.S51C   | c.152C>G  | Unverified | ggc | tcc | acc | 2 | C | G |
| TCGA-04-1331 | TRIO       | ENST00000344204 | p.R400R  | c.1200C>G | Verified   | aac | cgc | atc | 3 | C | G |
| TCGA-25-2392 | TRIO       | ENST00000344204 | p.N1671K | c.5013C>G | Verified   | tgc | aac | agc | 3 | C | G |

|              |            |                 |           |            |            |     |     |     |   |   |   |
|--------------|------------|-----------------|-----------|------------|------------|-----|-----|-----|---|---|---|
| TCGA-09-2056 | TRIOBP_ENS | ENST00000406386 | p.S1153C  | c.3458C>G  | Unverified | GAC | TCT | CTG | 2 | C | G |
| TCGA-24-1422 | TRIP12     | ENST00000283943 | p.Q1281E  | c.3841C>G  | Verified   | AAG | CAG | TGG | 1 | C | G |
| TCGA-23-2078 | TRO        | ENST00000319167 | p.T323S   | c.968C>G   | Unverified | gcc | act | cag | 2 | C | G |
| TCGA-24-1103 | TRPM5      | ENST00000155858 | p.G860G   | c.2580C>G  | Verified   | CTG | GGC | CCC | 3 | C | G |
| TCGA-13-1510 | TRPM7      | ENST00000313478 | p.S1427C  | c.4280C>G  | Verified   | TGC | TCT | AAA | 2 | C | G |
| TCGA-61-1910 | TRRAP      | ENST00000355540 | p.P2528R  | c.7583C>G  | Unverified | GAG | CCC | CGG | 2 | C | G |
| TCGA-61-1910 | TRRAP_ENS  | ENST00000359863 | p.P2546R  | c.7637C>G  | Unverified | GAG | CCC | CGG | 2 | C | G |
| TCGA-23-1031 | TSC22D2    | ENST00000361875 | p.S198C   | c.593C>G   | Verified   | AGA | TCC | GGG | 2 | C | G |
| TCGA-29-1691 | TSHZ3      | NM_020856.1     | p.P791A   | c.2371C>G  | Unverified | cac | ccc | gtc | 1 | C | G |
| TCGA-29-1691 | TSHZ3_ENS  | ENST00000240587 | p.P974A   | c.2920C>G  | Unverified | CAC | CCC | GTC | 1 | C | G |
| TCGA-36-1577 | TSPYL1     | ENST00000368608 | p.Y303*   | c.909C>G   | Unverified | AGG | TAC | ATA | 3 | C | G |
| TCGA-13-0913 | TTBK2      | ENST00000267890 | p.Q752E   | c.2254C>G  | Verified   | tct | caa | gac | 1 | C | G |
| TCGA-61-2095 | TTC16      | ENST00000373289 | p.L555V   | c.1663C>G  | Unverified | GAG | CTG | AAG | 1 | C | G |
| TCGA-13-0760 | TTC17      | ENST0000039989  | p.Y871*   | c.2613C>G  | Verified   | CGT | TAC | CAA | 3 | C | G |
| TCGA-29-1703 | TTC18      | ENST00000355577 | p.P134P   | c.402C>G   | Unverified | TCA | CCC | TTA | 3 | C | G |
| TCGA-61-1737 | TTC21A     | ENST00000431162 | p.P602A   | c.1804C>G  | Unverified | TTG | CCA | GCT | 1 | C | G |
| TCGA-23-1124 | TTC3       | ENST00000354749 | p.H1121D  | c.3361C>G  | Verified   | GAA | CAT | GGT | 1 | C | G |
| TCGA-13-1497 | TTF1       | ENST00000334270 | p.S240W   | c.719C>G   | Verified   | GGA | TCG | CAA | 2 | C | G |
| TCGA-13-1497 | TTK        | ENST00000369798 | p.S214*   | c.641C>G   | Verified   | GAA | TCA | TTT | 2 | C | G |
| TCGA-25-1326 | TTK        | ENST00000369798 | p.T637R   | c.1910C>G  | Verified   | CAC | ACA | ATC | 2 | C | G |
| TCGA-04-1343 | TTN        | NM_003319       | p.L2929V  | c.8785C>G  | Verified   | atg | ctg | aaa | 1 | C | G |
| TCGA-09-2056 | TTN        | NM_003319       | p.H769D   | c.2305C>G  | Verified   | cct | cac | ttt | 1 | C | G |
| TCGA-13-0807 | TTN        | NM_003319       | p.Q25512E | c.76534C>G | Verified   | gat | cag | tat | 1 | C | G |
| TCGA-13-0755 | TTN        | NM_003319       | p.T10524R | c.31571C>G | Verified   | gtt | aca | gaa | 2 | C | G |
| TCGA-24-1463 | TTN        | NM_003319       | p.V25109V | c.75327C>G | Verified   | ggt | gtc | cga | 3 | C | G |
| TCGA-61-1900 | TTN        | NM_003319       | p.Y23013* | c.69039C>G | Unverified | cgg | tac | gat | 3 | C | G |
| TCGA-61-1900 | TTN_ENST00 | ENST00000342175 | p.Y23205* | c.69615C>G | Unverified | CGG | TAC | GAT | 3 | C | G |
| TCGA-61-1900 | TTN_ENST00 | ENST00000342992 | p.Y29510* | c.88530C>G | Unverified | CGG | TAC | GAT | 3 | C | G |
| TCGA-04-1343 | TTN_ENST00 | ENST00000356127 | p.L2975V  | c.8923C>G  | Verified   | ATG | CTG | AAA | 1 | C | G |
| TCGA-09-2056 | TTN_ENST00 | ENST00000356127 | p.H815D   | c.2443C>G  | Verified   | CCT | CAC | TTT | 1 | C | G |
| TCGA-13-0807 | TTN_ENST00 | ENST00000356127 | p.Q32007E | c.96019C>G | Verified   | GAT | CAG | TAT | 1 | C | G |
| TCGA-13-0755 | TTN_ENST00 | ENST00000356127 | p.T17019R | c.51056C>G | Verified   | GTT | ACA | GAA | 2 | C | G |
| TCGA-24-1463 | TTN_ENST00 | ENST00000356127 | p.V31604V | c.94812C>G | Verified   | GGC | GTC | CGA | 3 | C | G |
| TCGA-61-1900 | TTN_ENST00 | ENST00000356127 | p.Y29508* | c.88524C>G | Unverified | CGG | TAC | GAT | 3 | C | G |

|              |                     |                 |           |             |            |     |     |     |   |   |   |
|--------------|---------------------|-----------------|-----------|-------------|------------|-----|-----|-----|---|---|---|
| TCGA-61-1900 | TTN_ENST00000359218 | ENST00000359218 | p.Y23138* | c.69414C>G  | Unverified | CGG | TAC | GAT | 3 | C | G |
| TCGA-04-1343 | TTN_ENST00000360870 | ENST00000360870 | p.L2975V  | c.8923C>G   | Verified   | ATG | CTG | AAA | 1 | C | G |
| TCGA-09-2056 | TTN_ENST00000360870 | ENST00000360870 | p.H815D   | c.2443C>G   | Verified   | CCT | CAC | TTT | 1 | C | G |
| TCGA-13-1481 | TUBB8               | ENST00000328974 | p.P346R   | c.1037C>G   | Verified   | CTC | CCC | AAC | 2 | C | G |
| TCGA-29-1768 | TUBGCP4             | ENST00000564079 | p.H121D   | c.361C>G    | Unverified | TCA | CAT | GTC | 1 | C | G |
| TCGA-24-1431 | TXNRD2              | ENST00000400521 | p.Y194*   | c.582C>G    | Verified   | AGA | TAC | CCC | 3 | C | G |
| TCGA-23-1031 | TYRO3               | NM_006293       | p.A265G   | c.794C>G    | Verified   | ctg | gct | gtt | 2 | C | G |
| TCGA-13-1497 | TYRO3               | NM_006293       | p.P765P   | c.2295C>G   | Verified   | gac | ccc | aag | 3 | C | G |
| TCGA-24-2288 | TYW1                | ENST00000359626 | p.R406G   | c.1216C>G   | Unverified | CAT | CGC | TGC | 1 | C | G |
| TCGA-61-2012 | UBA1                | ENST00000377351 | p.V589V   | c.1767C>G   | Verified   | tgt | gtc | tac | 3 | C | G |
| TCGA-25-1313 | UBAC2               | ENST00000376440 | p.L102V   | c.304C>G    | Verified   | GCT | CTG | TTT | 1 | C | G |
| TCGA-04-1338 | UBAP2               | ENST00000379238 | p.A744G   | c.2231C>G   | Verified   | ACG | GCA | GCG | 2 | C | G |
| TCGA-13-0807 | UBASH3A             | ENST00000319294 | p.N638K   | c.1914C>G   | Verified   | GTG | AAC | CCA | 3 | C | G |
| TCGA-61-2095 | UBE2O               | ENST00000319380 | p.L1258L  | c.3774C>G   | Unverified | CCC | CTC | TTC | 3 | C | G |
| TCGA-25-1313 | UBE2Q2              | ENST00000267938 | p.P371R   | c.1112C>G   | Verified   | CCT | CCA | AAG | 2 | C | G |
| TCGA-13-1499 | UBR4                | ENST00000375254 | p.R1349G  | c.4045C>G   | Verified   | GCT | CGT | GTT | 1 | C | G |
| TCGA-13-0887 | UGT1A10             | ENST00000344644 | p.H37Q    | c.111C>G    | Verified   | AGT | CAC | TGG | 3 | C | G |
| TCGA-61-2012 | UGT1A4              | ENST00000373409 | p.P40P    | c.120C>G    | Unverified | AGC | CCC | TGG | 3 | C | G |
| TCGA-23-1110 | UGT1A8              | ENST00000373450 | p.S78*    | c.233C>G    | Verified   | TAC | TCA | ACC | 2 | C | G |
| TCGA-29-1764 | UGT2A1              | ENST00000503640 | p.Q109E   | c.325C>G    | Unverified | TAT | CAG | GAG | 1 | C | G |
| TCGA-13-1488 | UGT2A3              | ENST00000251566 | p.I129M   | c.387C>G    | Verified   | TTT | ATC | TAC | 3 | C | G |
| TCGA-23-1022 | UMOD                | ENST00000302509 | p.A556G   | c.1667C>G   | Verified   | TTT | GCT | GGA | 2 | C | G |
| TCGA-24-1422 | UMPS                | ENST00000232607 | p.P234A   | c.700C>G    | Unverified | ctg | ccc | agg | 1 | C | G |
| TCGA-29-1702 | UNG                 | ENST00000336865 | p.T129T   | c.387C>G    | Unverified | tgg | acc | cag | 3 | C | G |
| TCGA-29-1702 | UNG_ENST00000242576 | ENST00000242576 | p.T138T   | c.414C>G    | Unverified | TGG | ACC | CAG | 3 | C | G |
| TCGA-24-1104 | UPB1                | ENST00000326010 | p.D309E   | c.927C>G    | Verified   | CAG | GAC | TTT | 3 | C | G |
| TCGA-09-2056 | UPF2                | ENST00000356352 | p.A587G   | c.1760C>G   | Verified   | AAG | GCA | GCA | 2 | C | G |
| TCGA-04-1530 | UQCRC1              | ENST00000203407 | p.T343T   | c.1029C>G   | Unverified | CAG | ACC | TTC | 3 | C | G |
| TCGA-29-1703 | USP21               | ENST00000368002 | p.?       | c.1384+5C>G | Unverified | CTC | CAT | CTG | 1 | C | G |
| TCGA-23-1120 | USP24               | XM_371254.3     | p.L1006V  | c.3016C>G   | Verified   | cag | ctc | gcc | 1 | C | G |
| TCGA-13-0885 | USP25               | ENST00000285679 | p.L881L   | c.2643C>G   | Verified   | tat | ctc | ata | 3 | C | G |
| TCGA-24-1847 | USP29               | ENST00000254181 | p.P324R   | c.971C>G    | Unverified | att | ccc | ttt | 2 | C | G |
| TCGA-23-1124 | USP33               | ENST00000370793 | p.P758R   | c.2273C>G   | Verified   | ggc | cct | att | 2 | C | G |
| TCGA-04-1338 | USP34               | ENST00000398571 | p.F2924L  | c.8772C>G   | Verified   | CAG | TTC | AAG | 3 | C | G |

|              |            |                 |          |           |            |     |     |     |   |   |   |
|--------------|------------|-----------------|----------|-----------|------------|-----|-----|-----|---|---|---|
| TCGA-29-1696 | USP53      | ENST00000274030 | p.S416C  | c.1247C>G | Unverified | TCA | TCT | AAT | 2 | C | G |
| TCGA-29-1696 | USP53      | ENST00000274030 | p.S416C  | c.1247C>G | Unverified | TCA | TCT | AAT | 2 | C | G |
| TCGA-23-1124 | USP7       | ENST00000344836 | p.A27G   | c.80C>G   | Verified   | GAA | GCG | GGA | 2 | C | G |
| TCGA-23-1123 | UTP14A     | ENST00000394422 | p.?      | c.27-3C>G | Verified   | gag | agc | ctt | 3 | C | G |
| TCGA-23-1123 | UTP14A     | ENST00000394422 | p.?      | c.27-3C>G | Verified   | gag | agc | ctt | 3 | C | G |
| TCGA-24-1474 | UTP6       | ENST00000261708 | p.A388G  | c.1163C>G | Verified   | GAA | GCT | CTG | 2 | C | G |
| TCGA-61-1998 | VASP       | ENST00000245932 | p.R86R   | c.258C>G  | Unverified | GCT | CGC | CAG | 3 | C | G |
| TCGA-23-1114 | VCL        | ENST00000211998 | p.Q689E  | c.2065C>G | Unverified | AAT | CAA | GCT | 1 | C | G |
| TCGA-29-1699 | VCL        | ENST00000211998 | p.P847R  | c.2540C>G | Unverified | CCA | CCA | GAC | 2 | C | G |
| TCGA-13-0807 | VN1R4      | ENST00000311170 | p.F23L   | c.69C>G   | Verified   | AGC | TTC | TCT | 3 | C | G |
| TCGA-09-2051 | VNN1       | ENST00000367928 | p.R459G  | c.1375C>G | Unverified | GGA | CGC | TTG | 1 | C | G |
| TCGA-23-1118 | VNN1       | ENST00000367928 | p.S486*  | c.1457C>G | Verified   | GCA | TCA | AAT | 2 | C | G |
| TCGA-04-1347 | VPS11      | ENST00000300793 | p.A196G  | c.587C>G  | Verified   | CAA | GCA | GGA | 2 | C | G |
| TCGA-13-0893 | VPS13C     | ENST00000261517 | p.L935V  | c.2803C>G | Verified   | ATT | CTA | GTA | 1 | C | G |
| TCGA-61-1910 | VPS13C     | ENST00000261517 | p.H2269D | c.6805C>G | Unverified | GAA | CAT | TCA | 1 | C | G |
| TCGA-61-1910 | VPS13C_ENS | ENST00000395896 | p.H2269D | c.6805C>G | Unverified | GAA | CAT | TCA | 1 | C | G |
| TCGA-29-1769 | VPS13D     | ENST00000358136 | p.P3102P | c.9306C>G | Unverified | CGG | CCC | AAA | 3 | C | G |
| TCGA-24-1417 | VPS33B     | ENST00000333371 | p.L399L  | c.1197C>G | Verified   | CGC | CTC | ATG | 3 | C | G |
| TCGA-09-2049 | VPS52      | ENST00000445902 | p.A204G  | c.611C>G  | Verified   | GAT | GCC | AAG | 2 | C | G |
| TCGA-13-0760 | VPS52      | ENST00000445902 | p.T526R  | c.1577C>G | Verified   | CAG | ACA | ATT | 2 | C | G |
| TCGA-24-1464 | VPS52      | ENST00000445902 | p.T597R  | c.1790C>G | Verified   | CGG | ACA | CAG | 2 | C | G |
| TCGA-13-0755 | VSIG1      | ENST00000217957 | p.R89G   | c.265C>G  | Verified   | gat | cga | att | 1 | C | G |
| TCGA-04-1361 | VTI1A      | ENST00000393077 | p.L207V  | c.619C>G  | Verified   | ATC | CTG | ATG | 1 | C | G |
| TCGA-04-1361 | VTI1A      | ENST00000393077 | p.L207V  | c.619C>G  | Verified   | ATC | CTG | ATG | 1 | C | G |
| TCGA-61-2113 | VTN        | ENST00000226218 | p.P240P  | c.720C>G  | Verified   | TAC | CCC | CGA | 3 | C | G |
| TCGA-61-1915 | VWA3B      | ENST00000477737 | p.L15V   | c.43C>G   | Unverified | CAG | CTG | CAG | 1 | C | G |
| TCGA-25-2042 | VWA5A      | ENST00000392748 | p.L230L  | c.690C>G  | Verified   | GAA | CTC | CTG | 3 | C | G |
| TCGA-13-0923 | VWF        | ENST00000261405 | p.T2255S | c.6764C>G | Unverified | TGC | ACT | CAG | 2 | C | G |
| TCGA-24-1423 | WASF2      | ENST00000430629 | p.P268A  | c.802C>G  | Verified   | ttg | cct | cct | 1 | C | G |
| TCGA-23-1022 | WBP2NL     | ENST00000329620 | p.L83V   | c.247C>G  | Verified   | AAC | CTC | ACT | 1 | C | G |
| TCGA-23-1809 | WDR74      | ENST00000529106 | p.R7R    | c.21C>G   | Unverified | GCA | CGC | TGG | 3 | C | G |
| TCGA-23-1809 | WDR74_ENS  | ENST00000525239 | p.R7R    | c.21C>G   | Unverified | GCA | CGC | TGG | 3 | C | G |
| TCGA-25-2042 | WDR75      | ENST00000314761 | p.S743C  | c.2228C>G | Verified   | CCA | TCT | GCT | 2 | C | G |
| TCGA-13-0885 | WNK3       | ENST00000354646 | p.Q625E  | c.1873C>G | Verified   | TAC | CAG | CAA | 1 | C | G |

|              |            |                 |          |           |            |     |     |     |   |   |   |
|--------------|------------|-----------------|----------|-----------|------------|-----|-----|-----|---|---|---|
| TCGA-24-0979 | WNK4       | ENST00000246914 | p.S1231R | c.3693C>G | Verified   | GCA | AGC | AAG | 3 | C | G |
| TCGA-61-2109 | WNT7B      | ENST00000339464 | p.A154G  | c.461C>G  | Unverified | TCG | GCC | GAC | 2 | C | G |
| TCGA-25-2042 | WRN        | ENST00000298139 | p.L211V  | c.631C>G  | Verified   | aaa | ctg | tat | 1 | C | G |
| TCGA-25-1326 | WWC3       | NM_015691.2     | p.P403P  | c.1209C>G | Verified   | aag | ccc | gac | 3 | C | G |
| TCGA-04-1652 | XAB2       | ENST00000358368 | p.F388L  | c.1164C>G | Unverified | CCC | TTC | AAG | 3 | C | G |
| TCGA-04-1652 | XAB2       | ENST00000358368 | p.F388L  | c.1164C>G | Unverified | CCC | TTC | AAG | 3 | C | G |
| TCGA-13-0903 | XDH        | ENST00000379416 | p.T1033S | c.3098C>G | Verified   | CTG | ACC | CAC | 2 | C | G |
| TCGA-13-1497 | XPNPEP1    | ENST00000369680 | p.R473G  | c.1417C>G | Verified   | GCC | CGT | TCA | 1 | C | G |
| TCGA-13-1497 | XYLT1      | ENST00000261381 | p.P849A  | c.2545C>G | Verified   | CAG | CCC | ATC | 1 | C | G |
| TCGA-23-1114 | YARS2      | ENST00000324868 | p.S245C  | c.734C>G  | Unverified | GGA | TCT | GAT | 2 | C | G |
| TCGA-13-1507 | YBX1       | ENST00000321358 | p.P149R  | c.446C>G  | Verified   | TAT | CCA | CGT | 2 | C | G |
| TCGA-30-1891 | YOD1       | ENST00000315927 | p.A53G   | c.158C>G  | Unverified | AAG | GCC | AAG | 2 | C | G |
| TCGA-24-1844 | YTHDC1     | ENST00000344157 | p.S393C  | c.1178C>G | Unverified | AGA | TCT | GCA | 2 | C | G |
| TCGA-13-0755 | YY1AP1     | ENST00000295566 | p.T314S  | c.941C>G  | Verified   | CTA | ACC | TGC | 2 | C | G |
| TCGA-29-1761 | ZBTB12     | ENST00000375527 | p.D99E   | c.297C>G  | Unverified | AGG | GAC | ATC | 3 | C | G |
| TCGA-04-1342 | ZBTB17     | ENST00000375743 | p.A107A  | c.321C>G  | Unverified | ACG | GCC | TGC | 3 | C | G |
| TCGA-24-2288 | ZBTB47     | ENST00000232974 | p.L591V  | c.1771C>G | Unverified | CAG | CTG | CGG | 1 | C | G |
| TCGA-30-1857 | ZBTB5      | ENST00000307750 | p.L158L  | c.474C>G  | Unverified | GCC | CTC | AAT | 3 | C | G |
| TCGA-29-1770 | ZC3H12C    | ENST00000278590 | p.S520S  | c.1560C>G | Unverified | CCT | TCC | TTA | 3 | C | G |
| TCGA-25-2401 | ZC3H18     | ENST00000301011 | p.V359V  | c.1077C>G | Unverified | GAT | GTC | AGA | 3 | C | G |
| TCGA-23-1031 | ZC3H7A     | ENST00000355758 | p.N465K  | c.1395C>G | Verified   | GCT | AAC | ATA | 3 | C | G |
| TCGA-13-1481 | ZDHHC14    | ENST00000359775 | p.Q336E  | c.1006C>G | Verified   | ccg | cag | cca | 1 | C | G |
| TCGA-29-1761 | ZEB2       | ENST00000303660 | p.A191G  | c.572C>G  | Unverified | gag | gcc | aat | 2 | C | G |
| TCGA-04-1649 | ZFAT_ENSTC | ENST00000377838 | p.T933S  | c.2798C>G | Unverified | AGC | ACT | GAG | 2 | C | G |
| TCGA-25-2400 | ZFP28      | ENST00000301318 | p.I152M  | c.456C>G  | Verified   | GTG | ATC | TCC | 3 | C | G |
| TCGA-23-1031 | ZFPM2      | ENST00000407775 | p.S423R  | c.1269C>G | Verified   | CAG | AGC | CAA | 3 | C | G |
| TCGA-13-0762 | ZIC1       | ENST00000282928 | p.S399C  | c.1196C>G | Verified   | AGC | TCT | GGC | 2 | C | G |
| TCGA-13-0762 | ZIC1       | ENST00000282928 | p.S399C  | c.1196C>G | Verified   | AGC | TCT | GGC | 2 | C | G |
| TCGA-13-0920 | ZKSCAN1    | ENST00000324306 | p.Q257E  | c.769C>G  | Verified   | AGG | CAG | GAG | 1 | C | G |
| TCGA-13-1408 | ZMIZ2      | ENST00000309315 | p.P403A  | c.1207C>G | Verified   | AAG | CCC | AAC | 1 | C | G |
| TCGA-61-1998 | ZMIZ2      | ENST00000309315 | p.Q53E   | c.157C>G  | Verified   | ACA | CAG | AGC | 1 | C | G |
| TCGA-24-1431 | ZNF121     | ENST00000320451 | p.A96A   | c.288C>G  | Verified   | GAA | GCC | TTT | 3 | C | G |
| TCGA-04-1338 | ZNF136     | ENST00000343979 | p.L40V   | c.118C>G  | Verified   | AAT | CTG | GCC | 1 | C | G |
| TCGA-61-1900 | ZNF16      | ENST00000394909 | p.P48R   | c.143C>G  | Unverified | ACC | CCC | TGC | 2 | C | G |



|              |            |                 |          |           |            |     |     |     |   |   |   |
|--------------|------------|-----------------|----------|-----------|------------|-----|-----|-----|---|---|---|
| TCGA-61-2094 | ZNF167     | ENST00000273320 | p.L454V  | c.1360C>G | Unverified | CAT | CTC | ATT | 1 | C | G |
| TCGA-24-1563 | ZNF177     | ENST00000343499 | p.H254Q  | c.762C>G  | Verified   | GTG | CAC | AAG | 3 | C | G |
| TCGA-09-1674 | ZNF197     | ENST00000344387 | p.T393S  | c.1178C>G | Unverified | cac | act | ggt | 2 | C | G |
| TCGA-09-1674 | ZNF213     | ENST00000574902 | p.L226V  | c.676C>G  | Unverified | GAT | CTC | TTC | 1 | C | G |
| TCGA-61-2109 | ZNF215     | ENST00000278319 | p.L188V  | c.562C>G  | Unverified | AAC | CTG | TAC | 1 | C | G |
| TCGA-04-1356 | ZNF224     | ENST00000336976 | p.H162Q  | c.486C>G  | Verified   | TCC | CAC | TTT | 3 | C | G |
| TCGA-24-1846 | ZNF24      | ENST00000399061 | p.Q90E   | c.268C>G  | Unverified | GAA | CAA | ATC | 1 | C | G |
| TCGA-23-1809 | ZNF24      | ENST00000399061 | p.S142C  | c.425C>G  | Unverified | GTT | TCT | CTC | 2 | C | G |
| TCGA-30-1856 | ZNF257     | ENST00000322487 | p.L300V  | c.898C>G  | Unverified | GCA | CTA | ACC | 1 | C | G |
| TCGA-20-1685 | ZNF280D    | ENST00000267807 | p.Q496E  | c.1486C>G | Unverified | ACT | CAA | CAC | 1 | C | G |
| TCGA-29-1777 | ZNF333     | ENST00000292530 | p.T72R   | c.215C>G  | Unverified | GCC | ACA | GGT | 2 | C | G |
| TCGA-09-2049 | ZNF385B    | ENST00000410066 | p.P128R  | c.383C>G  | Verified   | TTT | CCA | AAT | 2 | C | G |
| TCGA-29-1702 | ZNF439     | ENST00000304030 | p.S57C   | c.170C>G  | Unverified | ACC | TCT | ATA | 2 | C | G |
| TCGA-04-1343 | ZNF44      | ENST00000426973 | p.P514A  | c.1540C>G | Verified   | AAA | CCT | TAT | 1 | C | G |
| TCGA-30-1855 | ZNF493     | ENST00000355504 | p.H635D  | c.1903C>G | Unverified | ATT | CAT | ATT | 1 | C | G |
| TCGA-30-1855 | ZNF493_ENS | ENST00000392288 | p.H763D  | c.2287C>G | Unverified | ATT | CAT | ATT | 1 | C | G |
| TCGA-13-1481 | ZNF498     | ENST00000394152 | p.R450G  | c.1348C>G | Verified   | CAC | CGG | AGG | 1 | C | G |
| TCGA-13-0760 | ZNF536     | ENST00000355537 | p.P56A   | c.166C>G  | Verified   | AAC | CCC | GAG | 1 | C | G |
| TCGA-13-0906 | ZNF546     | ENST00000347077 | p.S70C   | c.209C>G  | Verified   | CTC | TCC | CAA | 2 | C | G |
| TCGA-09-1665 | ZNF563     | ENST00000293725 | p.S323R  | c.969C>G  | Unverified | GGA | AGC | TTT | 3 | C | G |
| TCGA-29-1761 | ZNF574     | ENST00000359044 | p.R493G  | c.1477C>G | Unverified | GAG | CGG | CGC | 1 | C | G |
| TCGA-04-1337 | ZNF582     | ENST00000301310 | p.T331S  | c.992C>G  | Verified   | CAG | ACT | GTT | 2 | C | G |
| TCGA-13-1507 | ZNF608     | ENST00000306315 | p.L732V  | c.2194C>G | Verified   | AAA | CTG | AAA | 1 | C | G |
| TCGA-29-1762 | ZNF638     | ENST00000264447 | p.T1568S | c.4703C>G | Unverified | GAA | ACT | CTC | 2 | C | G |
| TCGA-29-1693 | ZNF644     | ENST00000370440 | p.S671*  | c.2012C>G | Unverified | CAA | TCA | AGT | 2 | C | G |
| TCGA-25-2400 | ZNF646     | ENST00000300850 | p.A386G  | c.1157C>G | Unverified | CAT | GCT | GGG | 2 | C | G |
| TCGA-29-2427 | ZNF70      | ENST00000341976 | p.L284V  | c.850C>G  | Verified   | GAT | CTC | TGT | 1 | C | G |
| TCGA-04-1651 | ZNF700     | ENST00000254321 | p.A544A  | c.1632C>G | Unverified | AAA | GCC | TTC | 3 | C | G |
| TCGA-04-1651 | ZNF700     | ENST00000254321 | p.A544A  | c.1632C>G | Unverified | AAA | GCC | TTC | 3 | C | G |
| TCGA-24-1435 | ZNF729     | ENST00000357491 | p.T763S  | c.2288C>G | Unverified | CAT | ACT | AGG | 2 | C | G |
| TCGA-29-1764 | ZNF777     | ENST00000247930 | p.P132A  | c.394C>G  | Unverified | TCC | CCT | GAA | 1 | C | G |
| TCGA-24-1850 | ZNF862     | ENST00000223210 | p.I778M  | c.2334C>G | Unverified | GAG | ATC | ATC | 3 | C | G |
| TCGA-24-1463 | ZNRF3      | ENST00000406323 | p.T275T  | c.825C>G  | Verified   | AGG | ACC | AAC | 3 | C | G |
| TCGA-13-1509 | ZSCAN21    | ENST00000292450 | p.T321T  | c.963C>G  | Verified   | CTC | ACC | CTC | 3 | C | G |

|              |            |                 |          |            |            |     |     |     |   |   |   |
|--------------|------------|-----------------|----------|------------|------------|-----|-----|-----|---|---|---|
| TCGA-13-0760 | ZZEF1      | ENST00000381638 | p.L2607L | c.7821C>G  | Verified   | TAC | CTC | TTC | 3 | C | G |
| TCGA-04-1638 | A2M        | ENST00000318602 | p.V476V  | c.1428C>T  | Unverified | ACA | GTC | CAG | 3 | C | T |
| TCGA-30-1718 | A4GNT      | ENST00000236709 | p.T306I  | c.917C>T   | Unverified | AAC | ACA | CTG | 2 | C | T |
| TCGA-24-1103 | AACS       | ENST00000316519 | p.P413S  | c.1237C>T  | Verified   | TCC | CCA | CTG | 1 | C | T |
| TCGA-61-2113 | AARS2      | ENST00000244571 | p.P700P  | c.2100C>T  | Unverified | GTG | CCC | CTG | 3 | C | T |
| TCGA-24-1616 | AASDH      | ENST00000205214 | p.R442*  | c.1324C>T  | Verified   | GGA | CGA | AAA | 1 | C | T |
| TCGA-23-1122 | ABCA10     | ENST00000269081 | p.L930F  | c.2788C>T  | Verified   | GAT | CTT | GGT | 1 | C | T |
| TCGA-23-1032 | ABCA12     | ENST00000272895 | p.H1573Y | c.4717C>T  | Verified   | TAT | CAC | CTC | 1 | C | T |
| TCGA-61-1737 | ABCA12     | ENST00000272895 | p.Y1997Y | c.5991C>T  | Unverified | GGC | TAC | TCT | 3 | C | T |
| TCGA-29-1761 | ABCA13_EN  | ENST00000435803 | p.T1377M | c.4130C>T  | Unverified | GAC | ACG | TTA | 2 | C | T |
| TCGA-29-1702 | ABCA13_EN  | ENST00000435803 | p.R4043R | c.12129C>T | Unverified | GAC | CGC | GTG | 3 | C | T |
| TCGA-04-1337 | ABCA3      | ENST00000301732 | p.H1069Y | c.3205C>T  | Unverified | CCT | CAC | GCC | 1 | C | T |
| TCGA-13-0755 | ABCA3      | ENST00000301732 | p.C1494C | c.4482C>T  | Verified   | GCC | TGC | GTG | 3 | C | T |
| TCGA-13-1507 | ABCA4      | ENST00000370225 | p.S281L  | c.842C>T   | Verified   | ATG | TCA | CCA | 2 | C | T |
| TCGA-25-2393 | ABCA6      | ENST00000284425 | p.A1534V | c.4601C>T  | Verified   | CAG | GCT | GCA | 2 | C | T |
| TCGA-23-1122 | ABCA9      | ENST00000340001 | p.P898S  | c.2692C>T  | Verified   | TCT | CCA | AAT | 1 | C | T |
| TCGA-61-1904 | ABCB4      | ENST00000359206 | p.T560M  | c.1679C>T  | Unverified | GCC | ACG | TCA | 2 | C | T |
| TCGA-04-1342 | ABCB9      | ENST00000392439 | p.R700W  | c.2098C>T  | Unverified | CAC | CGG | CTG | 1 | C | T |
| TCGA-20-0991 | ABCC10     | ENST00000244533 | p.R957W  | c.2869C>T  | Verified   | CTC | CGG | GCA | 1 | C | T |
| TCGA-23-1022 | ABCC10     | ENST00000244533 | p.Q311*  | c.931C>T   | Verified   | CTT | CAG | GCA | 1 | C | T |
| TCGA-30-1714 | ABCC11     | ENST00000356608 | p.T70T   | c.210C>T   | Unverified | AGA | ACC | ATG | 3 | C | T |
| TCGA-29-1693 | ABCC5      | ENST00000334444 | p.S944S  | c.2832C>T  | Unverified | GCT | TCC | TCC | 3 | C | T |
| TCGA-23-1122 | ABCC6      | ENST00000205557 | p.A624V  | c.1871C>T  | Verified   | GCT | GCC | GGG | 2 | C | T |
| TCGA-13-0883 | ABCC9      | ENST00000261200 | p.S51S   | c.153C>T   | Verified   | GGG | AGC | CAA | 3 | C | T |
| TCGA-24-1844 | ABCC9      | ENST00000261200 | p.V1319V | c.3957C>T  | Unverified | TGT | GTC | AGA | 3 | C | T |
| TCGA-24-1844 | ABCC9_ENS  | ENST00000261201 | p.V1319V | c.3957C>T  | Unverified | TGT | GTC | AGA | 3 | C | T |
| TCGA-23-1120 | ABCF1      | ENST00000326195 | p.P843S  | c.2527C>T  | Verified   | CGG | CCC | CGA | 1 | C | T |
| TCGA-29-1703 | ABCF2      | ENST00000287844 | p.A170V  | c.509C>T   | Unverified | CGG | GCC | ATG | 2 | C | T |
| TCGA-29-1695 | ABCF2      | ENST00000287844 | p.N622N  | c.1866C>T  | Unverified | CAC | AAC | GTG | 3 | C | T |
| TCGA-13-1499 | ABCG4      | ENST00000307417 | p.A608V  | c.1823C>T  | Verified   | CGA | GCG | CTG | 2 | C | T |
| TCGA-23-1029 | ABCG8      | ENST00000272286 | p.Y37Y   | c.111C>T   | Unverified | CTG | TAC | TTC | 3 | C | T |
| TCGA-20-1683 | ABHD16B    | ENST00000369916 | p.V227V  | c.681C>T   | Unverified | GTG | GTC | GAG | 3 | C | T |
| TCGA-36-1577 | ABHD6      | ENST00000295962 | p.P269L  | c.806C>T   | Verified   | GTT | CCG | ACG | 2 | C | T |
| TCGA-29-1691 | AC003101.1 | ENST00000412403 | p.V133V  | c.399C>T   | Unverified | TAC | GTC | CAA | 3 | C | T |

|              |            |                     |          |           |            |     |     |     |   |   |   |
|--------------|------------|---------------------|----------|-----------|------------|-----|-----|-----|---|---|---|
| TCGA-29-1691 | AC003101.1 | ENST00000412403_v68 | p.V133V  | c.399C>T  | Unverified | TAC | GTC | CAA | 3 | C | T |
| TCGA-29-1703 | AC011537.1 | ENST00000412610     | p.R149C  | c.445C>T  | Unverified | TGC | CGC | CTG | 1 | C | T |
| TCGA-29-1703 | AC011537.1 | ENST00000412610_v68 | p.R149C  | c.445C>T  | Unverified | TGC | CGC | CTG | 1 | C | T |
| TCGA-61-1910 | AC012100.1 | ENST00000261854     | p.P272L  | c.815C>T  | Unverified | ATA | CCA | TAT | 2 | C | T |
| TCGA-29-1783 | AC013469_ξ | ENST00000408934     | p.R53W   | c.157C>T  | Unverified | CCA | CGG | CTC | 1 | C | T |
| TCGA-23-1124 | AC027369_ξ | ENST00000402751     | p.L450L  | c.1348C>T | Verified   | TCC | CTG | ATA | 1 | C | T |
| TCGA-23-1120 | ACACB      | ENST00000377848     | p.T1404I | c.4211C>T | Verified   | CGC | ACC | TCC | 2 | C | T |
| TCGA-13-0919 | ACAD10     | ENST00000313698     | p.A990V  | c.2969C>T | Unverified | GCA | GCC | TTG | 2 | C | T |
| TCGA-04-1362 | ACAD10     | ENST00000313698     | p.R939R  | c.2817C>T | Verified   | GCC | CGC | GTG | 3 | C | T |
| TCGA-24-1470 | ACADVL     | ENST00000356839     | p.I258I  | c.774C>T  | Verified   | GAC | ATC | TTC | 3 | C | T |
| TCGA-29-1698 | ACAP1      | ENST00000158762     | p.H381H  | c.1143C>T | Unverified | GGA | CAC | CTG | 3 | C | T |
| TCGA-09-0369 | ACBD4      | ENST00000398322     | p.R67*   | c.199C>T  | Verified   | GGA | CGA | TAT | 1 | C | T |
| TCGA-09-0369 | ACBD4      | ENST00000398322     | p.R67*   | c.199C>T  | Verified   | GGA | CGA | TAT | 1 | C | T |
| TCGA-23-1122 | ACCN3      | ENST00000349064     | p.P259S  | c.775C>T  | Verified   | TCC | CCG | GGC | 1 | C | T |
| TCGA-29-1768 | ACER1      | ENST00000301452     | p.S10S   | c.30C>T   | Unverified | AGC | TCC | GAG | 3 | C | T |
| TCGA-29-1770 | ACIN1      | ENST00000262710     | p.L529L  | c.1587C>T | Unverified | CCC | CTC | CCT | 3 | C | T |
| TCGA-29-1691 | ACOT12     | ENST00000307624     | p.F108F  | c.324C>T  | Unverified | GCT | TTC | TCC | 3 | C | T |
| TCGA-24-1850 | ACP1_ENST0 | ENST00000272067     | p.N51N   | c.153C>T  | Unverified | TGG | AAC | GTG | 3 | C | T |
| TCGA-23-1124 | ACP6       | ENST00000369238     | p.Y110Y  | c.330C>T  | Verified   | CAA | TAC | CAT | 3 | C | T |
| TCGA-61-1904 | ACRBP      | ENST00000229243     | p.Q293*  | c.877C>T  | Unverified | GCC | CAG | GAA | 1 | C | T |
| TCGA-24-1616 | ACRC       | ENST00000373695     | p.D206D  | c.618C>T  | Unverified | TCC | GAC | GAC | 3 | C | T |
| TCGA-24-2262 | ACSBG1     | ENST00000258873     | p.I540I  | c.1620C>T | Unverified | GCC | ATC | GAC | 3 | C | T |
| TCGA-29-1783 | ACSBG1     | ENST00000258873     | p.G552G  | c.1656C>T | Unverified | GCT | GGC | CGC | 3 | C | T |
| TCGA-09-2049 | ACSBG2     | ENST00000252669     | p.S338S  | c.1014C>T | Verified   | AAG | TCC | ATG | 3 | C | T |
| TCGA-20-1686 | ACSL4      | ENST00000469796     | p.P418L  | c.1253C>T | Unverified | gca | cct | ctt | 2 | C | T |
| TCGA-23-1809 | ACTL7A     | ENST00000333999     | p.A41A   | c.123C>T  | Unverified | CGG | GCC | GTG | 3 | C | T |
| TCGA-24-2267 | ACTL8      | ENST00000375406     | p.Q134*  | c.400C>T  | Verified   | CTG | CAG | ATG | 1 | C | T |
| TCGA-04-1331 | ACTRT1     | ENST00000371124     | p.R231C  | c.691C>T  | Verified   | cta | cgc | aag | 1 | C | T |
| TCGA-25-2400 | ADA        | ENST00000372874     | p.R253W  | c.757C>T  | Verified   | ctg | cgg | cag | 1 | C | T |
| TCGA-29-1784 | ADAM11     | ENST00000200557     | p.S145F  | c.434C>T  | Unverified | CAC | TCC | TTC | 2 | C | T |
| TCGA-29-1784 | ADAM11_EM  | ENST00000200557     | p.S145F  | c.434C>T  | Unverified | CAC | TCC | TTC | 2 | C | T |
| TCGA-24-1417 | ADAM15     | ENST00000356955     | p.L402F  | c.1204C>T | Verified   | gcc | ctc | ctg | 1 | C | T |
| TCGA-13-0920 | ADAM19     | NM_023038.2         | p.P685S  | c.2053C>T | Verified   | aca | ccg | ggc | 1 | C | T |
| TCGA-23-1029 | ADAM30     | ENST00000369400     | p.A252V  | c.755C>T  | Unverified | aag | gct | ctt | 2 | C | T |

|              |           |                 |          |           |            |     |     |     |   |   |   |
|--------------|-----------|-----------------|----------|-----------|------------|-----|-----|-----|---|---|---|
| TCGA-61-1895 | ADAM9     | ENST00000487273 | p.P790L  | c.2369C>T | Unverified | agg | cca | cct | 2 | C | T |
| TCGA-61-2012 | ADAMTS13  | ENST00000371929 | p.P557S  | c.1669C>T | Verified   | AGC | CCA | CGG | 1 | C | T |
| TCGA-24-1844 | ADAMTS19  | NM_133638.1     | p.L605L  | c.1813C>T | Unverified | aag | cta | gac | 1 | C | T |
| TCGA-04-1652 | ADAMTS5   | ENST00000284987 | p.S566S  | c.1698C>T | Unverified | TCA | AGC | CAT | 3 | C | T |
| TCGA-04-1652 | ADAMTS5   | ENST00000284987 | p.S566S  | c.1698C>T | Unverified | TCA | AGC | CAT | 3 | C | T |
| TCGA-13-0906 | ADAMTS5   | ENST00000284987 | p.R614R  | c.1842C>T | Verified   | TAC | CGC | TCC | 3 | C | T |
| TCGA-29-1695 | ADAMTS5   | ENST00000284987 | p.A458A  | c.1374C>T | Unverified | TCA | GCC | ACC | 3 | C | T |
| TCGA-29-1695 | ADAMTS5   | ENST00000284987 | p.C721C  | c.2163C>T | Unverified | AAG | TGC | GGA | 3 | C | T |
| TCGA-20-1686 | ADAMTS7   | ENST00000388820 | p.D512D  | c.1536C>T | Unverified | GTG | GAC | GGC | 3 | C | T |
| TCGA-61-1904 | ADAMTS8   | ENST00000257359 | p.C294C  | c.882C>T  | Unverified | TTC | TGC | AAC | 3 | C | T |
| TCGA-61-1904 | ADAMTS8_E | ENST00000257359 | p.C294C  | c.882C>T  | Unverified | TTC | TGC | AAC | 3 | C | T |
| TCGA-61-1904 | ADAMTS8_E | ENST00000414575 | p.C323C  | c.969C>T  | Unverified | GAG | TGC | AAG | 3 | C | T |
| TCGA-24-2267 | ADAMTSL1  | NM_139238.1     | p.C49C   | c.147C>T  | Verified   | acc | tgc | ggg | 3 | C | T |
| TCGA-24-2267 | ADAMTSL1_ | ENST00000380548 | p.C49C   | c.147C>T  | Verified   | ACC | TGC | GGG | 3 | C | T |
| TCGA-04-1343 | ADAMTSL3  | ENST00000286744 | p.R958W  | c.2872C>T | Verified   | AAA | CGG | CTT | 1 | C | T |
| TCGA-20-1686 | ADAMTSL4  | ENST00000369038 | p.R1060C | c.3178C>T | Unverified | TGC | CGC | TCT | 1 | C | T |
| TCGA-24-1850 | ADARB2    | ENST00000381312 | p.T692M  | c.2075C>T | Unverified | GAC | ACG | CCC | 2 | C | T |
| TCGA-30-1856 | ADC       | ENST00000373443 | p.P374S  | c.1120C>T | Unverified | CTG | CCG | CAA | 1 | C | T |
| TCGA-29-1776 | ADCK3     | NM_020247       | p.D278D  | c.834C>T  | Unverified | gaa | gac | gcc | 3 | C | T |
| TCGA-29-1776 | ADCK3_ENS | ENST00000366779 | p.D557D  | c.1671C>T | Unverified | GAA | GAC | GCC | 3 | C | T |
| TCGA-13-1510 | ADCY3     | ENST00000260600 | p.P25S   | c.73C>T   | Unverified | CTG | CCC | TCC | 1 | C | T |
| TCGA-29-1762 | ADCY3     | ENST00000260600 | p.T976I  | c.2927C>T | Unverified | AAA | ACC | ATT | 2 | C | T |
| TCGA-23-2078 | ADCY4     | ENST00000310677 | p.P847L  | c.2540C>T | Unverified | CTC | CCT | GCA | 2 | C | T |
| TCGA-23-1114 | ADCY9     | ENST00000294016 | p.N1280N | c.3840C>T | Unverified | GCC | AAC | CTG | 3 | C | T |
| TCGA-25-2392 | ADD2      | ENST00000355733 | p.R420*  | c.1258C>T | Verified   | CTG | CGA | CAG | 1 | C | T |
| TCGA-13-0920 | ADH1A     | ENST00000209668 | p.V84V   | c.252C>T  | Verified   | aca | gtc | aaa | 3 | C | T |
| TCGA-24-1474 | ADH1B     | ENST00000305046 | p.S194F  | c.581C>T  | Verified   | GGC | TCT | ACC | 2 | C | T |
| TCGA-61-1738 | ADIPOR1   | ENST00000340990 | p.G278G  | c.834C>T  | Unverified | AGT | GGC | GTC | 3 | C | T |
| TCGA-61-1738 | ADIPOR1   | ENST00000340990 | p.G278G  | c.834C>T  | Unverified | AGT | GGC | GTC | 3 | C | T |
| TCGA-13-0791 | ADNP2     | ENST00000262198 | p.I916I  | c.2748C>T | Verified   | TGC | ATC | CAC | 3 | C | T |
| TCGA-24-1847 | ADNP2     | ENST00000262198 | p.L390L  | c.1170C>T | Unverified | GTC | CTC | CCC | 3 | C | T |
| TCGA-23-1022 | ADORA2B   | ENST00000304222 | p.L310F  | c.928C>T  | Verified   | ctt | ctc | tgc | 1 | C | T |
| TCGA-29-1763 | AEN       | ENST00000332810 | p.A201V  | c.602C>T  | Unverified | CAG | GCG | CTC | 2 | C | T |
| TCGA-13-0885 | AFF3      | ENST00000356421 | p.D1117D | c.3351C>T | Verified   | ATC | GAC | TAT | 3 | C | T |

|              |            |                 |          |            |            |     |     |     |   |   |   |
|--------------|------------|-----------------|----------|------------|------------|-----|-----|-----|---|---|---|
| TCGA-24-2280 | AFF4       | ENST00000265343 | p.S965F  | c.2894C>T  | Unverified | AAA | TCC | CCA | 2 | C | T |
| TCGA-23-1123 | AFP        | ENST00000395792 | p.I255I  | c.765C>T   | Verified   | GAA | ATC | CAG | 3 | C | T |
| TCGA-23-1123 | AFP        | ENST00000395792 | p.I255I  | c.765C>T   | Verified   | GAA | ATC | CAG | 3 | C | T |
| TCGA-13-1496 | AGBL5      | ENST00000360131 | p.S664F  | c.1991C>T  | Verified   | AAT | TCC | CCC | 2 | C | T |
| TCGA-13-0900 | AHCYL1     | ENST00000369799 | p.R365W  | c.1093C>T  | Verified   | ATC | CGG | CAA | 1 | C | T |
| TCGA-13-0795 | AHCYL2     | ENST00000325006 | p.Q150*  | c.448C>T   | Verified   | TCT | CAG | TCA | 1 | C | T |
| TCGA-24-2280 | AHNAK      | ENST00000378024 | p.P3575S | c.10723C>T | Unverified | GGG | CCA | GAG | 1 | C | T |
| TCGA-24-0979 | AHNAK      | ENST00000378024 | p.P2656L | c.7967C>T  | Verified   | GGC | CCA | GAT | 2 | C | T |
| TCGA-61-2094 | AHNAK2_EN  | ENST00000333244 | p.S3955F | c.11864C>T | Unverified | CTG | TCC | CTG | 2 | C | T |
| TCGA-09-0369 | AIM1       | ENST00000369066 | p.L613F  | c.1837C>T  | Verified   | GAG | CTC | GCG | 1 | C | T |
| TCGA-09-0369 | AIM1       | ENST00000369066 | p.L613F  | c.1837C>T  | Verified   | GAG | CTC | GCG | 1 | C | T |
| TCGA-29-1763 | AKAP13     | ENST00000361243 | p.T1888I | c.5663C>T  | Unverified | gaa | acc | gct | 2 | C | T |
| TCGA-29-1763 | AKAP13_EN  | ENST00000394518 | p.T1884I | c.5651C>T  | Unverified | GAA | ACC | GCT | 2 | C | T |
| TCGA-30-1714 | AKD1_ENST  | ENST00000424296 | p.T1810I | c.5429C>T  | Unverified | GCA | ACT | TCT | 2 | C | T |
| TCGA-24-1470 | AKR1C1     | ENST00000380872 | p.L257L  | c.769C>T   | Verified   | GCC | CTG | CGC | 1 | C | T |
| TCGA-29-1711 | AKR1C4     | ENST00000380448 | p.T127M  | c.380C>T   | Unverified | GAG | ACG | CCA | 2 | C | T |
| TCGA-29-1711 | AKR1C4     | ENST00000380448 | p.T127M  | c.380C>T   | Unverified | GAG | ACG | CCA | 2 | C | T |
| TCGA-20-0990 | AKR1D1     | ENST00000242375 | p.I21I   | c.63C>T    | Unverified | ATC | ATC | GGA | 3 | C | T |
| TCGA-04-1338 | ALB        | ENST00000295897 | p.H312H  | c.936C>T   | Verified   | TCC | CAC | TGC | 3 | C | T |
| TCGA-13-0923 | ALDH3A2    | ENST00000581518 | p.P441L  | c.1322C>T  | Verified   | tat | cct | ccc | 2 | C | T |
| TCGA-13-0923 | ALG8       | ENST00000299626 | p.H160Y  | c.478C>T   | Verified   | GAC | CAT | ATT | 1 | C | T |
| TCGA-04-1336 | ALOX15B    | ENST00000380183 | p.A363V  | c.1088C>T  | Verified   | aat | gcc | gag | 2 | C | T |
| TCGA-04-1331 | ALOXE3     | NM_021628.1     | p.I148I  | c.444C>T   | Unverified | aag | atc | tat | 3 | C | T |
| TCGA-13-1481 | ALPK1      | ENST00000458497 | p.A848A  | c.2544C>T  | Verified   | GAT | GCC | TCC | 3 | C | T |
| TCGA-09-1665 | ALPK2      | NM_052947       | p.A1230V | c.3689C>T  | Verified   | act | gct | gaa | 2 | C | T |
| TCGA-25-2398 | ALPK2      | NM_052947       | p.A650A  | c.1950C>T  | Verified   | ttg | gcc | ccc | 3 | C | T |
| TCGA-09-1665 | ALPK2_ENST | ENST00000361673 | p.A1869V | c.5606C>T  | Verified   | ACT | GCT | GAA | 2 | C | T |
| TCGA-25-2398 | ALPK2_ENST | ENST00000361673 | p.A1289A | c.3867C>T  | Verified   | TTG | GCC | CCC | 3 | C | T |
| TCGA-24-1469 | ALPP       | ENST00000392027 | p.P4S    | c.10C>T    | Verified   | GGG | CCC | TGC | 1 | C | T |
| TCGA-23-2077 | AMDHD1     | ENST00000266736 | p.A302A  | c.906C>T   | Unverified | TCT | GCC | ATC | 3 | C | T |
| TCGA-29-1781 | AMPD1      | NM_000036.1     | p.A412V  | c.1235C>T  | Unverified | ggt | gcg | gac | 2 | C | T |
| TCGA-24-2289 | AMPD1      | NM_000036.1     | p.F637F  | c.1911C>T  | Unverified | gat | ttc | ctt | 3 | C | T |
| TCGA-29-1781 | AMPD1_EN   | ENST00000520113 | p.A445V  | c.1334C>T  | Unverified | GGT | GCG | GAC | 2 | C | T |
| TCGA-09-1665 | AMPH       | ENST00000356264 | p.P249S  | c.745C>T   | Verified   | GCG | CCC | AGT | 1 | C | T |

|              |            |                     |          |           |            |     |     |     |   |   |   |
|--------------|------------|---------------------|----------|-----------|------------|-----|-----|-----|---|---|---|
| TCGA-04-1337 | ANGPTL2    | ENST00000373425     | p.V224V  | c.672C>T  | Unverified | CGG | GTC | TAC | 3 | C | T |
| TCGA-24-2289 | ANGPTL5    | ENST00000334289     | p.C324C  | c.972C>T  | Unverified | AGC | TGC | AGT | 3 | C | T |
| TCGA-61-1738 | ANK2       | ENST00000357077     | p.R1062C | c.3184C>T | Unverified | AGC | CGC | ATT | 1 | C | T |
| TCGA-61-1738 | ANK2       | ENST00000357077     | p.R1062C | c.3184C>T | Unverified | AGC | CGC | ATT | 1 | C | T |
| TCGA-61-1914 | ANK2       | ENST00000357077     | p.L1044F | c.3130C>T | Unverified | AAA | CTT | CAC | 1 | C | T |
| TCGA-61-2113 | ANK2       | ENST00000357077     | p.H242Y  | c.724C>T  | Verified   | GCA | CAT | TAC | 1 | C | T |
| TCGA-24-2289 | ANK2       | ENST00000357077     | p.A702V  | c.2105C>T | Unverified | CTT | GCA | GCC | 2 | C | T |
| TCGA-61-1725 | ANKHD1     | ENST00000360839     | p.G2172G | c.6516C>T | Unverified | caa | ggc | cca | 3 | C | T |
| TCGA-13-0755 | ANKHD1-EIF | ENST00000297183     | p.C2579C | c.7737C>T | Verified   | CAT | TGC | CCG | 3 | C | T |
| TCGA-61-1725 | ANKHD1-EIF | ENST00000297183     | p.G2172G | c.6516C>T | Unverified | CAA | GGC | CCA | 3 | C | T |
| TCGA-13-0807 | ANKRD17    | NM_032217.3         | p.N2366N | c.7098C>T | Verified   | gct | aac | ttt | 3 | C | T |
| TCGA-25-2400 | ANKRD30A   | ENST00000361713     | p.I327I  | c.981C>T  | Verified   | AAG | ATC | GCA | 3 | C | T |
| TCGA-13-0885 | ANO2       | ENST00000327087     | p.D312D  | c.936C>T  | Verified   | CAT | GAC | GGT | 3 | C | T |
| TCGA-04-1652 | ANO2       | ENST00000327087     | p.N769N  | c.2307C>T | Unverified | AAC | AAC | GTC | 3 | C | T |
| TCGA-04-1652 | ANO2       | ENST00000327087     | p.N769N  | c.2307C>T | Unverified | AAC | AAC | GTC | 3 | C | T |
| TCGA-04-1652 | ANO2_ENST  | ENST00000327087_v68 | p.N769N  | c.2307C>T | Unverified | AAC | AAC | GTC | 3 | C | T |
| TCGA-04-1652 | ANO2_ENST  | ENST00000327087_v68 | p.N769N  | c.2307C>T | Unverified | AAC | AAC | GTC | 3 | C | T |
| TCGA-13-1496 | ANO4       | ENST00000392979     | p.T573I  | c.1718C>T | Verified   | TCC | ACA | TTT | 2 | C | T |
| TCGA-29-1775 | ANO7       | ENST00000274979     | p.D111D  | c.333C>T  | Unverified | GCA | GAC | TTC | 3 | C | T |
| TCGA-10-0930 | ANO8       | ENST00000159087     | p.D783D  | c.2349C>T | Verified   | AGC | GAC | GCC | 3 | C | T |
| TCGA-10-0930 | ANO8       | ENST00000159087     | p.D783D  | c.2349C>T | Verified   | AGC | GAC | GCC | 3 | C | T |
| TCGA-13-0884 | ANTXR2     | ENST00000307333     | p.P269L  | c.806C>T  | Verified   | AAA | CCA | GTA | 2 | C | T |
| TCGA-24-1845 | ANTXR2     | ENST00000307333     | p.L24L   | c.72C>T   | Unverified | GTG | CTC | AGC | 3 | C | T |
| TCGA-24-1845 | ANTXR2_EN  | ENST00000403729     | p.L24L   | c.72C>T   | Unverified | GTG | CTC | AGC | 3 | C | T |
| TCGA-09-0369 | AOC2       | ENST00000253799     | p.Q632*  | c.1894C>T | Verified   | ACC | CAG | AGA | 1 | C | T |
| TCGA-09-0369 | AOC2       | ENST00000253799     | p.Q632*  | c.1894C>T | Verified   | ACC | CAG | AGA | 1 | C | T |
| TCGA-23-1123 | AOC2       | ENST00000253799     | p.S311L  | c.932C>T  | Verified   | TTC | TCG | CCC | 2 | C | T |
| TCGA-23-1123 | AOC2       | ENST00000253799     | p.S311L  | c.932C>T  | Verified   | TTC | TCG | CCC | 2 | C | T |
| TCGA-29-1702 | AOC3       | ENST00000308423     | p.R329*  | c.985C>T  | Unverified | AGT | CGA | GTG | 1 | C | T |
| TCGA-13-1496 | AP001011.2 | ENST00000261598     | p.H430Y  | c.1288C>T | Verified   | TAT | CAT | CCA | 1 | C | T |
| TCGA-13-1496 | AP001011.3 | ENST00000320876     | p.H430Y  | c.1288C>T | Verified   | TAT | CAT | CCA | 1 | C | T |
| TCGA-09-1674 | AP1G2      | ENST00000397120     | p.R40C   | c.118C>T  | Unverified | TTC | CGC | GAC | 1 | C | T |
| TCGA-13-0904 | AP2A1      | ENST00000359032     | p.S179L  | c.536C>T  | Verified   | GCC | TCG | CCT | 2 | C | T |
| TCGA-13-1510 | AP3B2      | ENST00000261722     | p.C954C  | c.2862C>T | Unverified | CTG | TGC | ACC | 3 | C | T |

|              |           |                 |          |           |            |     |     |     |   |   |   |
|--------------|-----------|-----------------|----------|-----------|------------|-----|-----|-----|---|---|---|
| TCGA-29-1784 | AP4E1     | ENST00000261842 | p.Q57*   | c.169C>T  | Unverified | ATC | CAG | CAG | 1 | C | T |
| TCGA-61-1725 | APBA2     | ENST00000561069 | p.A57V   | c.170C>T  | Unverified | CCC | GCG | CCA | 2 | C | T |
| TCGA-29-1761 | APOB      | ENST00000233242 | p.I2218I | c.6654C>T | Unverified | CAT | ATC | CGT | 3 | C | T |
| TCGA-61-1895 | APOB      | ENST00000233242 | p.S242S  | c.726C>T  | Unverified | AGC | AGC | CAG | 3 | C | T |
| TCGA-13-0890 | APOBEC3B  | ENST00000333467 | p.A295V  | c.884C>T  | Verified   | cgt | gcg | ttc | 2 | C | T |
| TCGA-24-1470 | APOBEC3D_ | ENST00000216099 | p.A301A  | c.903C>T  | Unverified | GTG | GCC | GAG | 3 | C | T |
| TCGA-13-1498 | APTX      | ENST00000309615 | p.R43C   | c.127C>T  | Verified   | GGG | CGT | GGC | 1 | C | T |
| TCGA-25-2391 | AQR       | ENST00000156471 | p.I226I  | c.678C>T  | Unverified | CTC | ATC | CAG | 3 | C | T |
| TCGA-09-2056 | ARAF      | ENST00000377045 | p.P561P  | c.1683C>T | Verified   | ttc | ccc | cag | 3 | C | T |
| TCGA-20-0990 | ARHGAP19_ | ENST00000358531 | p.R18W   | c.52C>T   | Verified   | GGC | CGG | AGT | 1 | C | T |
| TCGA-24-1435 | ARHGAP30  | ENST00000368013 | p.V286V  | c.858C>T  | Verified   | AAG | GTC | AGG | 3 | C | T |
| TCGA-25-1313 | ARHGAP31  | ENST00000264245 | p.L310L  | c.928C>T  | Verified   | AAC | CTG | GGA | 1 | C | T |
| TCGA-29-1699 | ARHGAP36  | NM_144967.2     | p.R483W  | c.1447C>T | Unverified | gcc | cgg | gct | 1 | C | T |
| TCGA-13-1408 | ARHGAP6   | ENST00000337414 | p.R580W  | c.1738C>T | Unverified | GCC | CGG | GCT | 1 | C | T |
| TCGA-09-1674 | ARHGAP8   | ENST00000389774 | p.P144L  | c.431C>T  | Unverified | CAC | CCC | ACC | 2 | C | T |
| TCGA-25-2391 | ARHGEF10L | ENST00000361221 | p.G631G  | c.1893C>T | Unverified | TCA | GGC | GCC | 3 | C | T |
| TCGA-04-1347 | ARHGEF11  | ENST00000368194 | p.A515A  | c.1545C>T | Verified   | ttc | gcc | ctc | 3 | C | T |
| TCGA-25-1318 | ARHGEF12  | ENST00000397843 | p.L1267L | c.3799C>T | Unverified | CAG | CTA | GGT | 1 | C | T |
| TCGA-25-1318 | ARHGEF12  | ENST00000397843 | p.L1267L | c.3799C>T | Unverified | CAG | CTA | GGT | 1 | C | T |
| TCGA-29-1702 | ARHGEF15  | ENST00000361926 | p.S69S   | c.207C>T  | Unverified | gca | tcc | ctc | 3 | C | T |
| TCGA-61-1740 | ARHGEF2   | ENST00000313695 | p.I370I  | c.1110C>T | Unverified | ctc | atc | agc | 3 | C | T |
| TCGA-29-1695 | ARHGEF26  | ENST00000356448 | p.V703V  | c.2109C>T | Unverified | AAC | GTC | AAT | 3 | C | T |
| TCGA-29-1695 | ARHGEF26_ | ENST00000356448 | p.V703V  | c.2109C>T | Unverified | AAC | GTC | AAT | 3 | C | T |
| TCGA-24-2280 | ARHGEF4   | ENST00000326016 | p.H526H  | c.1578C>T | Unverified | gac | cac | cag | 3 | C | T |
| TCGA-13-0760 | ARID1A    | ENST00000324856 | p.Q1708* | c.5122C>T | Verified   | agt | cag | ctc | 1 | C | T |
| TCGA-61-1998 | ARID2     | ENST00000334344 | p.P1144S | c.3430C>T | Unverified | GTG | CCC | ATT | 1 | C | T |
| TCGA-04-1343 | ARID2     | ENST00000334344 | p.S742F  | c.2225C>T | Verified   | AGT | TCT | GTT | 2 | C | T |
| TCGA-13-0920 | ARMC10    | ENST00000323716 | p.H271Y  | c.811C>T  | Verified   | AGC | CAC | GTA | 1 | C | T |
| TCGA-09-2050 | ARMCX1    | ENST00000372829 | p.D32D   | c.96C>T   | Verified   | aga | gac | gag | 3 | C | T |
| TCGA-13-1496 | ARMCX1    | ENST00000372829 | p.N277N  | c.831C>T  | Verified   | gtg | aac | gca | 3 | C | T |
| TCGA-25-2393 | ARPP21    | ENST00000187397 | p.P528L  | c.1583C>T | Unverified | TCC | CCG | CAG | 2 | C | T |
| TCGA-29-1701 | ARPP21    | ENST00000187397 | p.T651M  | c.1952C>T | Unverified | ACC | ACG | CAA | 2 | C | T |
| TCGA-04-1651 | ARSB      | ENST00000264914 | p.L502L  | c.1504C>T | Unverified | CGC | CTA | CAG | 1 | C | T |
| TCGA-04-1651 | ARSB      | ENST00000264914 | p.L502L  | c.1504C>T | Unverified | CGC | CTA | CAG | 1 | C | T |

|              |             |                 |          |           |            |     |     |     |   |   |   |
|--------------|-------------|-----------------|----------|-----------|------------|-----|-----|-----|---|---|---|
| TCGA-29-1703 | ARSI        | ENST00000328668 | p.S378S  | c.1134C>T | Unverified | ATC | AGC | GAG | 3 | C | T |
| TCGA-13-1501 | ART5        | ENST00000397068 | p.R80*   | c.238C>T  | Verified   | CGT | CGA | GGG | 1 | C | T |
| TCGA-13-1501 | ART5        | ENST00000397068 | p.R80*   | c.238C>T  | Verified   | CGT | CGA | GGG | 1 | C | T |
| TCGA-13-0913 | ASCC3       | ENST00000369162 | p.A348V  | c.1043C>T | Verified   | ATT | GCC | AGA | 2 | C | T |
| TCGA-25-1313 | ASF1B       | ENST00000263382 | p.P130S  | c.388C>T  | Unverified | AAG | CCA | GAT | 1 | C | T |
| TCGA-04-1542 | ASNA1       | ENST00000357332 | p.R189W  | c.565C>T  | Verified   | GGC | CGG | CTT | 1 | C | T |
| TCGA-24-2267 | ASPHD2      | ENST00000382701 | p.T22T   | c.66C>T   | Verified   | GCC | ACC | GGC | 3 | C | T |
| TCGA-20-1686 | ASPM        | ENST00000367409 | p.A1719V | c.5156C>T | Unverified | GCT | GCA | CAA | 2 | C | T |
| TCGA-20-1686 | ASPN        | ENST00000375544 | p.R84*   | c.250C>T  | Unverified | TCA | CGA | GTT | 1 | C | T |
| TCGA-29-1690 | ASXL1       | ENST00000375687 | p.A1312V | c.3935C>T | Unverified | GCT | GCA | ACC | 2 | C | T |
| TCGA-29-1769 | ASXL3_ENST  | ENST00000269197 | p.T93M   | c.278C>T  | Unverified | GGC | ACG | TTG | 2 | C | T |
| TCGA-61-1733 | ASXL3_ENST  | ENST00000269197 | p.T563I  | c.1688C>T | Unverified | GAA | ACT | GCA | 2 | C | T |
| TCGA-61-1733 | ASXL3_ENST  | ENST00000269197 | p.T563I  | c.1688C>T | Unverified | GAA | ACT | GCA | 2 | C | T |
| TCGA-29-1711 | ATG7        | ENST00000354449 | p.A57V   | c.170C>T  | Unverified | TCT | GCT | GGG | 2 | C | T |
| TCGA-29-1711 | ATG7        | ENST00000354449 | p.A57V   | c.170C>T  | Unverified | TCT | GCT | GGG | 2 | C | T |
| TCGA-29-1693 | ATM         | ENST00000278616 | p.R451C  | c.1351C>T | Unverified | GAA | CGT | ACA | 1 | C | T |
| TCGA-29-1693 | ATM_ENST0   | ENST00000278616 | p.R451C  | c.1351C>T | Unverified | GAA | CGT | ACA | 1 | C | T |
| TCGA-10-0930 | ATN1        | ENST00000396684 | p.A1071V | c.3212C>T | Verified   | CAT | GCA | GCC | 2 | C | T |
| TCGA-10-0930 | ATN1        | ENST00000396684 | p.A1071V | c.3212C>T | Verified   | CAT | GCA | GCC | 2 | C | T |
| TCGA-23-1809 | ATP10B      | ENST00000327245 | p.S667F  | c.2000C>T | Unverified | GCA | TCT | GTG | 2 | C | T |
| TCGA-04-1336 | ATP10B      | ENST00000327245 | p.A711A  | c.2133C>T | Verified   | CTG | GCC | AGG | 3 | C | T |
| TCGA-30-1718 | ATP12A      | ENST00000381946 | p.A345A  | c.1035C>T | Unverified | GTG | GCC | AAT | 3 | C | T |
| TCGA-04-1361 | ATP13A1     | ENST00000357324 | p.Q1086* | c.3256C>T | Verified   | GAG | CAG | TTC | 1 | C | T |
| TCGA-04-1361 | ATP13A1     | ENST00000357324 | p.Q1086* | c.3256C>T | Verified   | GAG | CAG | TTC | 1 | C | T |
| TCGA-24-1103 | ATP1A1      | ENST00000295598 | p.R385W  | c.1153C>T | Verified   | AAC | CGG | ATG | 1 | C | T |
| TCGA-61-1740 | ATP1A4      | ENST00000368081 | p.A938V  | c.2813C>T | Unverified | TGG | GCG | GAT | 2 | C | T |
| TCGA-24-1431 | ATP1B1      | ENST00000367816 | p.T67I   | c.200C>T  | Verified   | CCC | ACA | TAT | 2 | C | T |
| TCGA-29-1703 | ATP2A1      | ENST00000357084 | p.D707D  | c.2121C>T | Unverified | AAT | GAC | GCC | 3 | C | T |
| TCGA-23-1031 | ATP2B2      | ENST00000383800 | p.R59C   | c.175C>T  | Verified   | CGG | CGC | CTC | 1 | C | T |
| TCGA-25-2393 | ATP2B3      | ENST00000359149 | p.S163S  | c.489C>T  | Unverified | CTG | TCC | GTC | 3 | C | T |
| TCGA-25-2393 | ATP2B3_ENST | ENST00000349466 | p.S163S  | c.489C>T  | Unverified | CTG | TCC | GTC | 3 | C | T |
| TCGA-25-2393 | ATP2B3_ENST | ENST00000370186 | p.S163S  | c.489C>T  | Unverified | CTG | TCC | GTC | 3 | C | T |
| TCGA-30-1856 | ATP4A       | ENST00000262623 | p.R95W   | c.283C>T  | Unverified | CCA | CGG | GGC | 1 | C | T |
| TCGA-24-1849 | ATP5C1      | ENST00000356708 | p.R4C    | c.10C>T   | Unverified | TCT | CGC | GCG | 1 | C | T |



|              |            |                 |          |           |            |     |     |     |   |   |   |
|--------------|------------|-----------------|----------|-----------|------------|-----|-----|-----|---|---|---|
| TCGA-29-1764 | ATP5E      | ENST00000395659 | p.S16F   | c.47C>T   | Unverified | TAC | TCC | CAG | 2 | C | T |
| TCGA-23-1110 | ATP7B      | ENST00000242839 | p.R1411W | c.4231C>T | Verified   | TGG | CGG | GAC | 1 | C | T |
| TCGA-24-1616 | ATP8A2     | ENST00000381655 | p.P944S  | c.2830C>T | Verified   | TTT | CCC | CAG | 1 | C | T |
| TCGA-04-1337 | ATP8B3     | ENST00000539485 | p.H1250Y | c.3748C>T | Unverified | CCT | CAT | GTA | 1 | C | T |
| TCGA-13-0795 | ATP9A      | ENST00000338821 | p.S184L  | c.551C>T  | Verified   | GGG | TCA | TGC | 2 | C | T |
| TCGA-61-2008 | ATRNL1     | ENST00000355044 | p.L603L  | c.1809C>T | Verified   | GTA | CTC | CTT | 3 | C | T |
| TCGA-13-0883 | ATXN7L2    | ENST00000369870 | p.H103Y  | c.307C>T  | Verified   | AGA | CAT | GGG | 1 | C | T |
| TCGA-29-1770 | AUP1       | ENST00000377526 | p.V315V  | c.945C>T  | Unverified | GGT | GTC | ATC | 3 | C | T |
| TCGA-24-2262 | AUTS2      | ENST00000342771 | p.P596P  | c.1788C>T | Verified   | CCA | CCC | ACT | 3 | C | T |
| TCGA-29-1777 | AVP11      | ENST00000370626 | p.R130C  | c.388C>T  | Unverified | ATC | CGC | CGG | 1 | C | T |
| TCGA-13-0890 | AWAT1      | XM_088691.4     | p.T165M  | c.494C>T  | Verified   | att | acg | atc | 2 | C | T |
| TCGA-23-1111 | AXDND1     | ENST00000367618 | p.P10L   | c.29C>T   | Unverified | ACC | CCG | CTA | 2 | C | T |
| TCGA-29-1775 | AZGP1      | ENST00000292401 | p.A46V   | c.137C>T  | Unverified | CCC | GCG | TTT | 2 | C | T |
| TCGA-04-1652 | AZI1       | ENST00000374782 | p.P133P  | c.399C>T  | Unverified | CAG | CCC | CGG | 3 | C | T |
| TCGA-04-1652 | AZI1       | ENST00000374782 | p.P133P  | c.399C>T  | Unverified | CAG | CCC | CGG | 3 | C | T |
| TCGA-04-1652 | AZI1_ENST0 | ENST00000450824 | p.P133P  | c.399C>T  | Unverified | CAG | CCC | CGG | 3 | C | T |
| TCGA-04-1652 | AZI1_ENST0 | ENST00000450824 | p.P133P  | c.399C>T  | Unverified | CAG | CCC | CGG | 3 | C | T |
| TCGA-23-1031 | AZI2       | ENST00000479665 | p.S83S   | c.249C>T  | Verified   | AGT | TCC | GTG | 3 | C | T |
| TCGA-24-1469 | B3GALTL    | ENST00000343307 | p.H323Y  | c.967C>T  | Verified   | GGT | CAT | TGT | 1 | C | T |
| TCGA-13-0923 | B3GAT3     | ENST00000265471 | p.V190V  | c.570C>T  | Unverified | GTC | GTC | TAC | 3 | C | T |
| TCGA-29-1775 | B4GALNT2   | ENST00000300404 | p.Q493*  | c.1477C>T | Unverified | CTG | CAA | CGA | 1 | C | T |
| TCGA-23-1124 | B7         | ENST00000323702 | p.P300S  | c.898C>T  | Verified   | GTG | CCG | GTC | 1 | C | T |
| TCGA-24-1843 | BACH2      | ENST00000257749 | p.Y528Y  | c.1584C>T | Unverified | TCC | TAC | GCG | 3 | C | T |
| TCGA-24-1843 | BACH2_ENS  | ENST00000257749 | p.Y528Y  | c.1584C>T | Unverified | TCC | TAC | GCG | 3 | C | T |
| TCGA-13-0760 | BAG3       | ENST00000369085 | p.T285M  | c.854C>T  | Verified   | AGC | ACG | CCA | 2 | C | T |
| TCGA-23-1114 | BAHCC1     | ENST00000436173 | p.F1829F | c.5487C>T | Unverified | AGC | TTC | GCC | 3 | C | T |
| TCGA-20-0991 | BAI1       | NM_001702.1     | p.R865C  | c.2593C>T | Verified   | ctg | cgc | aca | 1 | C | T |
| TCGA-29-1701 | BAI2       | ENST00000373658 | p.T507M  | c.1520C>T | Unverified | GGC | ACG | CAG | 2 | C | T |
| TCGA-23-1809 | BAIAP3     | ENST00000324385 | p.P81P   | c.243C>T  | Unverified | AAA | CCC | GGG | 3 | C | T |
| TCGA-24-1470 | BAK1       | ENST00000374467 | p.Y38Y   | c.114C>T  | Verified   | agc | tac | gtt | 3 | C | T |
| TCGA-13-0884 | BANK1      | ENST00000322953 | p.T94I   | c.281C>T  | Verified   | CTA | ACT | CCA | 2 | C | T |
| TCGA-13-0714 | BAP1       | ENST00000460680 | p.R227C  | c.679C>T  | Verified   | ATC | CGC | TTC | 1 | C | T |
| TCGA-29-1766 | BASP1      | ENST00000322611 | p.G71G   | c.213C>T  | Unverified | GAG | GGC | GAG | 3 | C | T |
| TCGA-29-1695 | BAT2D1     | ENST00000392078 | p.R2825W | c.8473C>T | Unverified | CAA | CGG | TTC | 1 | C | T |

|              |           |                 |          |            |            |     |     |     |   |   |   |
|--------------|-----------|-----------------|----------|------------|------------|-----|-----|-----|---|---|---|
| TCGA-61-1899 | BAT2D1    | ENST00000392078 | p.P659L  | c.1976C>T  | Unverified | CGG | CCG | GCT | 2 | C | T |
| TCGA-29-1695 | BAT2D1_EN | ENST00000392078 | p.R2825W | c.8473C>T  | Unverified | CAA | CGG | TTC | 1 | C | T |
| TCGA-61-1899 | BAT2D1_EN | ENST00000392078 | p.P659L  | c.1976C>T  | Unverified | CGG | CCG | GCT | 2 | C | T |
| TCGA-61-1915 | BBS2      | ENST00000245157 | p.D636D  | c.1908C>T  | Unverified | AGG | GAC | ATG | 3 | C | T |
| TCGA-23-1122 | BBX       | ENST00000415149 | p.P705L  | c.2114C>T  | Verified   | AGT | CCT | GTT | 2 | C | T |
| TCGA-13-0885 | BCL3      | ENST00000164227 | p.R153W  | c.457C>T   | Verified   | CAC | CGG | CTG | 1 | C | T |
| TCGA-04-1542 | BCL9L     | NM_182557.1     | p.R680W  | c.2038C>T  | Verified   | ctg | cgg | cac | 1 | C | T |
| TCGA-23-1022 | BCOR      | ENST00000397354 | p.H1333H | c.3999C>T  | Verified   | AAA | CAC | TTG | 3 | C | T |
| TCGA-29-1770 | BCORL1    | ENST00000218147 | p.P901L  | c.2702C>T  | Unverified | gac | cct | gtt | 2 | C | T |
| TCGA-24-1431 | BDKRB1    | ENST00000216629 | p.A250V  | c.749C>T   | Verified   | ACA | GCG | CTG | 2 | C | T |
| TCGA-29-1770 | BDKRB2    | ENST00000554311 | p.L159L  | c.475C>T   | Unverified | GCC | CTG | GTG | 1 | C | T |
| TCGA-25-1326 | BEST2     | ENST00000042931 | p.Q238*  | c.712C>T   | Verified   | ACG | CAG | GTG | 1 | C | T |
| TCGA-04-1338 | BIRC2     | ENST00000227758 | p.S109S  | c.327C>T   | Verified   | cct | agc | tgt | 3 | C | T |
| TCGA-25-1318 | BIRC6     | ENST00000421745 | p.T4672M | c.14015C>T | Unverified | AAC | ACG | TGG | 2 | C | T |
| TCGA-25-1318 | BIRC6     | ENST00000421745 | p.T4672M | c.14015C>T | Unverified | AAC | ACG | TGG | 2 | C | T |
| TCGA-04-1356 | BMP10     | ENST00000295379 | p.P396S  | c.1186C>T  | Verified   | GAG | CCC | ATC | 1 | C | T |
| TCGA-61-2113 | BMP3      | ENST00000282701 | p.A188A  | c.564C>T   | Verified   | ATG | GCC | AAA | 3 | C | T |
| TCGA-29-1701 | BMP7      | ENST00000395863 | p.H384H  | c.1152C>T  | Unverified | gtc | cac | ttc | 3 | C | T |
| TCGA-04-1542 | BNC1      | ENST00000345382 | p.R107C  | c.319C>T   | Verified   | GTT | CGC | CTA | 1 | C | T |
| TCGA-13-0795 | BNIP1     | ENST00000231668 | p.V9V    | c.27C>T    | Verified   | CAC | GTC | CGG | 3 | C | T |
| TCGA-04-1343 | BOD1      | ENST00000311086 | p.A81V   | c.242C>T   | Verified   | CCA | GCT | TAC | 2 | C | T |
| TCGA-24-1847 | BOD1L     | ENST00000040738 | p.Q137*  | c.409C>T   | Unverified | TCT | CAG | GTT | 1 | C | T |
| TCGA-13-0885 | BPI       | ENST00000262865 | p.V22V   | c.66C>T    | Verified   | CTG | GTC | GCC | 3 | C | T |
| TCGA-24-1431 | BPI       | ENST00000262865 | p.S396S  | c.1188C>T  | Verified   | GGT | TCC | ATG | 3 | C | T |
| TCGA-23-1120 | BPIL2     | ENST00000397452 | p.R408C  | c.1222C>T  | Verified   | TTC | CGC | CTT | 1 | C | T |
| TCGA-24-1474 | BPIL3     | ENST00000349552 | p.A295V  | c.884C>T   | Verified   | CTG | GCT | CGC | 2 | C | T |
| TCGA-23-1122 | BRPF3     | ENST00000357641 | p.G997G  | c.2991C>T  | Verified   | ACA | GGC | ATG | 3 | C | T |
| TCGA-61-1899 | BRWD1     | ENST00000342449 | p.S145F  | c.434C>T   | Unverified | GGT | TCC | CCA | 2 | C | T |
| TCGA-61-1899 | BRWD1_EN  | ENST00000333229 | p.S145F  | c.434C>T   | Unverified | GGT | TCC | CCA | 2 | C | T |
| TCGA-04-1342 | BSN       | ENST00000296452 | p.P533L  | c.1598C>T  | Unverified | CCG | CCG | CCC | 2 | C | T |
| TCGA-61-2094 | BSND      | ENST00000371265 | p.P193S  | c.577C>T   | Unverified | GCC | CCC | TTG | 1 | C | T |
| TCGA-20-0990 | BTBD11    | ENST00000280758 | p.A775V  | c.2324C>T  | Verified   | CTG | GCG | GAG | 2 | C | T |
| TCGA-24-2288 | BTBD7     | ENST00000334746 | p.R963R  | c.2889C>T  | Unverified | AGA | CGC | ACC | 3 | C | T |
| TCGA-29-1701 | BTBD9     | ENST00000314100 | p.R31W   | c.91C>T    | Unverified | GGG | CGG | GCA | 1 | C | T |

|              |             |                     |          |           |            |     |     |     |   |   |   |
|--------------|-------------|---------------------|----------|-----------|------------|-----|-----|-----|---|---|---|
| TCGA-29-1701 | BTBD9_ENS   | ENST00000403056     | p.R99W   | c.295C>T  | Unverified | GGG | CGG | GCA | 1 | C | T |
| TCGA-13-1489 | BTK         | ENST00000308731     | p.S592F  | c.1775C>T | Verified   | TAC | TCC | CTG | 2 | C | T |
| TCGA-61-1907 | BTK         | ENST00000308731     | p.Y134Y  | c.402C>T  | Unverified | CGG | TAC | AAC | 3 | C | T |
| TCGA-23-1111 | BTN2A3      | ENST00000297020     | p.F337F  | c.1011C>T | Unverified | AGA | TTC | GAC | 3 | C | T |
| TCGA-09-2056 | BTNL9       | ENST00000327705     | p.A457V  | c.1370C>T | Verified   | GAG | GCC | GGA | 2 | C | T |
| TCGA-13-0887 | BTRC        | ENST00000370187     | p.P66S   | c.196C>T  | Verified   | ccc | cct | agg | 1 | C | T |
| TCGA-23-1117 | C10orf68    | ENST00000302316     | p.Q150*  | c.448C>T  | Verified   | GTG | CAA | TTA | 1 | C | T |
| TCGA-23-1117 | C10orf68    | ENST00000302316     | p.Q150*  | c.448C>T  | Verified   | GTG | CAA | TTA | 1 | C | T |
| TCGA-13-1507 | C11orf63    | ENST00000227349     | p.H762H  | c.2286C>T | Verified   | AGA | CAC | GAA | 3 | C | T |
| TCGA-61-1733 | C11orf63    | ENST00000227349     | p.L163L  | c.489C>T  | Unverified | CCC | CTC | TAC | 3 | C | T |
| TCGA-61-1733 | C11orf63    | ENST00000227349     | p.L163L  | c.489C>T  | Unverified | CCC | CTC | TAC | 3 | C | T |
| TCGA-30-1856 | C11orf67    | ENST00000526415     | p.G68G   | c.204C>T  | Unverified | ATT | GGC | CGA | 3 | C | T |
| TCGA-30-1891 | C11orf70    | ENST00000260246     | p.P98L   | c.293C>T  | Unverified | GAT | CCA | TTT | 2 | C | T |
| TCGA-09-2044 | C11orf82    | ENST00000430323     | p.S60F   | c.179C>T  | Verified   | CTT | TCC | TTA | 2 | C | T |
| TCGA-24-1463 | C12orf42    | ENST00000548883     | p.A281V  | c.842C>T  | Unverified | ATG | GCG | CCG | 2 | C | T |
| TCGA-13-0887 | C12orf42    | ENST00000548883     | p.A213A  | c.639C>T  | Verified   | TCT | GCC | GCC | 3 | C | T |
| TCGA-04-1331 | C12orf49    | ENST00000261318     | p.G123G  | c.369C>T  | Verified   | AAC | GGC | TGC | 3 | C | T |
| TCGA-13-0916 | C12orf50    | ENST00000298699     | p.Q53*   | c.157C>T  | Verified   | ATT | CAG | GAA | 1 | C | T |
| TCGA-61-1904 | C12orf51_EI | ENST00000377560_v62 | p.S1388S | c.4164C>T | Unverified | AGC | AGC | TCC | 3 | C | T |
| TCGA-13-0885 | C12orf59    | ENST00000298530     | p.S12S   | c.36C>T   | Verified   | TCA | TCC | TGT | 3 | C | T |
| TCGA-13-0904 | C12orf66    | ENST00000398055     | p.T92T   | c.276C>T  | Verified   | CGC | ACC | ATC | 3 | C | T |
| TCGA-61-1899 | C14orf37    | ENST00000267485     | p.S20S   | c.60C>T   | Unverified | TTC | AGC | GTT | 3 | C | T |
| TCGA-13-0883 | C14orf43    | ENST00000286523     | p.R322C  | c.964C>T  | Verified   | CTG | CGC | AAG | 1 | C | T |
| TCGA-24-2289 | C15orf2     | ENST00000329468     | p.A1084V | c.3251C>T | Unverified | TCT | GCT | GCC | 2 | C | T |
| TCGA-13-0923 | C15orf32    | ENST00000333334     | p.H68Y   | c.202C>T  | Verified   | TTG | CAC | CCA | 1 | C | T |
| TCGA-29-1785 | C15orf32    | ENST00000333334     | p.P104L  | c.311C>T  | Unverified | ACA | CCA | TCT | 2 | C | T |
| TCGA-29-1785 | C15orf32    | ENST00000333334     | p.P104L  | c.311C>T  | Unverified | ACA | CCA | TCT | 2 | C | T |
| TCGA-24-1435 | C15orf44    | ENST00000395644     | p.S22S   | c.66C>T   | Verified   | GGG | TCC | GAG | 3 | C | T |
| TCGA-13-0762 | C16orf89    | ENST00000350219     | p.S58S   | c.174C>T  | Verified   | TGG | TCC | TCC | 3 | C | T |
| TCGA-13-0762 | C16orf89    | ENST00000350219     | p.S58S   | c.174C>T  | Verified   | TGG | TCC | TCC | 3 | C | T |
| TCGA-23-1031 | C17orf39    | ENST00000268719     | p.Y230Y  | c.690C>T  | Unverified | GAC | TAC | GTC | 3 | C | T |
| TCGA-24-2262 | C19orf51    | ENST00000391720     | p.P68S   | c.202C>T  | Unverified | TCC | CCG | GCG | 1 | C | T |
| TCGA-23-1031 | C19orf55    | ENST00000396908     | p.H184H  | c.552C>T  | Verified   | CTC | CAC | ACA | 3 | C | T |
| TCGA-13-0893 | C1orf162    | ENST00000343534     | p.A121V  | c.362C>T  | Verified   | TAT | GCC | AGC | 2 | C | T |

|              |            |                 |         |           |            |     |     |     |   |   |   |
|--------------|------------|-----------------|---------|-----------|------------|-----|-----|-----|---|---|---|
| TCGA-24-1845 | C1orf173   | ENST00000326665 | p.L16F  | c.46C>T   | Unverified | AGC | CTT | ATG | 1 | C | T |
| TCGA-30-1856 | C1orf174   | ENST00000361605 | p.P142L | c.425C>T  | Unverified | GTG | CCA | AAA | 2 | C | T |
| TCGA-25-1313 | C1orf201   | ENST00000003583 | p.P142L | c.425C>T  | Verified   | CCT | CCC | CCA | 2 | C | T |
| TCGA-04-1338 | C1orf38    | ENST00000373925 | p.T101I | c.302C>T  | Verified   | ACA | ACT | CAG | 2 | C | T |
| TCGA-20-0991 | C1orf85    | ENST00000362007 | p.P104P | c.312C>T  | Verified   | GAG | CCC | GAT | 3 | C | T |
| TCGA-29-1691 | C1QTNF9    | ENST00000382071 | p.D46D  | c.138C>T  | Unverified | CGA | GAC | GGA | 3 | C | T |
| TCGA-29-1691 | C1QTNF9B   | ENST00000382140 | p.D46D  | c.138C>T  | Unverified | CGA | GAC | GGA | 3 | C | T |
| TCGA-29-1770 | C20orf112  | ENST00000359676 | p.S105F | c.314C>T  | Unverified | GCC | TCC | TAC | 2 | C | T |
| TCGA-24-1850 | C22orf15   | ENST00000336186 | p.G16G  | c.48C>T   | Unverified | AGA | GGC | AGA | 3 | C | T |
| TCGA-13-0791 | C2orf3     | ENST00000321027 | p.Q229* | c.685C>T  | Verified   | CAA | CAG | CAA | 1 | C | T |
| TCGA-25-1313 | C3orf15    | ENST00000273390 | p.A207V | c.620C>T  | Verified   | TCT | GCA | GAA | 2 | C | T |
| TCGA-25-2391 | C3orf25    | ENST00000505956 | p.P507L | c.1520C>T | Unverified | TGG | CCG | GGT | 2 | C | T |
| TCGA-23-1022 | C3orf25    | ENST00000505956 | p.P24P  | c.72C>T   | Verified   | ACT | CCC | ATC | 3 | C | T |
| TCGA-24-1423 | C3orf54    | ENST00000333323 | p.R236W | c.706C>T  | Unverified | CGC | CGG | CTG | 1 | C | T |
| TCGA-13-0807 | C4orf27    | ENST00000393381 | p.T207T | c.621C>T  | Verified   | AGA | ACC | GTG | 3 | C | T |
| TCGA-24-1469 | C5AR1      | ENST00000355085 | p.T29I  | c.86C>T   | Verified   | AAA | ACT | TCT | 2 | C | T |
| TCGA-30-1857 | C6orf105   | ENST00000414691 | p.F197F | c.591C>T  | Unverified | TTC | TTC | TCT | 3 | C | T |
| TCGA-23-1123 | C6orf146   | ENST00000274673 | p.P152S | c.454C>T  | Verified   | TGG | CCC | TAT | 1 | C | T |
| TCGA-23-1123 | C6orf146   | ENST00000274673 | p.P152S | c.454C>T  | Verified   | TGG | CCC | TAT | 1 | C | T |
| TCGA-24-2262 | C6orf222   | ENST00000437635 | p.R483W | c.1447C>T | Unverified | CAT | CGG | CCC | 1 | C | T |
| TCGA-30-1714 | C6orf224   | ENST00000321784 | p.T209I | c.626C>T  | Unverified | GCA | ACT | TCT | 2 | C | T |
| TCGA-13-0893 | C7_ENST000 | ENST00000313164 | p.Y719Y | c.2157C>T | Verified   | CCC | TAC | GAA | 3 | C | T |
| TCGA-13-0887 | C7orf57    | ENST00000348904 | p.S39F  | c.116C>T  | Verified   | GCG | TCC | CAG | 2 | C | T |
| TCGA-23-1114 | C7orf62    | ENST00000297203 | p.V5V   | c.15C>T   | Unverified | TCG | GTC | CAT | 3 | C | T |
| TCGA-13-0762 | C8orf4     | ENST00000315792 | p.H23Y  | c.67C>T   | Verified   | ATC | CAT | GGC | 1 | C | T |
| TCGA-13-0762 | C8orf4     | ENST00000315792 | p.H23Y  | c.67C>T   | Verified   | ATC | CAT | GGC | 1 | C | T |
| TCGA-25-1326 | C9orf106   | ENST00000316786 | p.L170L | c.510C>T  | Unverified | GCC | CTC | AGA | 3 | C | T |
| TCGA-29-1698 | C9orf114   | ENST00000361256 | p.P80L  | c.239C>T  | Unverified | CTG | CCG | GGC | 2 | C | T |
| TCGA-23-1114 | C9orf125   | ENST00000374848 | p.A75V  | c.224C>T  | Unverified | GAG | GCT | GCC | 2 | C | T |
| TCGA-61-1998 | C9orf125   | ENST00000374848 | p.T5T   | c.15C>T   | Unverified | TCA | ACC | TCT | 3 | C | T |
| TCGA-09-1674 | C9orf131   | ENST00000312292 | p.S719S | c.2157C>T | Unverified | CCC | AGC | CCT | 3 | C | T |
| TCGA-23-1124 | C9orf24    | ENST00000297623 | p.R129W | c.385C>T  | Verified   | CCT | CGG | CTG | 1 | C | T |
| TCGA-13-1512 | C9orf41    | ENST00000376834 | p.S160F | c.479C>T  | Verified   | AAA | TCC | ACG | 2 | C | T |
| TCGA-30-1714 | C9orf72    | ENST00000380003 | p.G390G | c.1170C>T | Unverified | CCT | GGC | TTA | 3 | C | T |

|              |            |                 |          |           |            |     |     |     |   |   |   |
|--------------|------------|-----------------|----------|-----------|------------|-----|-----|-----|---|---|---|
| TCGA-23-1123 | C9orf79    | ENST00000325643 | p.H1207H | c.3621C>T | Verified   | GCC | CAC | AGG | 3 | C | T |
| TCGA-23-1123 | C9orf79    | ENST00000325643 | p.H1207H | c.3621C>T | Verified   | GCC | CAC | AGG | 3 | C | T |
| TCGA-13-1497 | C9orf84    | ENST00000394779 | p.A421V  | c.1262C>T | Verified   | GGA | GCA | GCA | 2 | C | T |
| TCGA-24-1846 | CAB39_ENS  | ENST00000258418 | p.Q289*  | c.865C>T  | Unverified | ACG | CAG | CCC | 1 | C | T |
| TCGA-29-1785 | CABP4      | ENST00000325656 | p.P242S  | c.724C>T  | Unverified | GAG | CCG | CTG | 1 | C | T |
| TCGA-29-1785 | CABP4      | ENST00000325656 | p.P242S  | c.724C>T  | Unverified | GAG | CCG | CTG | 1 | C | T |
| TCGA-61-2102 | CACNA1C    | ENST00000402845 | p.N1547N | c.4641C>T | Verified   | ATC | AAC | CTC | 3 | C | T |
| TCGA-61-1904 | CACNA1D    | ENST00000288139 | p.R2093C | c.6277C>T | Unverified | GGA | CGC | TAT | 1 | C | T |
| TCGA-24-0979 | CACNA1H_E  | ENST00000358590 | p.I359I  | c.1077C>T | Unverified | GCC | ATC | AAC | 3 | C | T |
| TCGA-13-1498 | CACNA1S    | ENST00000362061 | p.L202L  | c.604C>T  | Verified   | CTG | CTG | GTC | 1 | C | T |
| TCGA-29-1699 | CACNA1S    | ENST00000362061 | p.S525S  | c.1575C>T | Unverified | ATC | TCC | GTG | 3 | C | T |
| TCGA-23-1110 | CACNG7     | ENST00000391767 | p.S244S  | c.732C>T  | Verified   | CCC | TCC | GAC | 3 | C | T |
| TCGA-09-1665 | CADM3      | ENST00000368124 | p.T229I  | c.686C>T  | Verified   | GTG | ACA | TTC | 2 | C | T |
| TCGA-13-0762 | CADPS2     | ENST00000449022 | p.N265N  | c.795C>T  | Verified   | GAT | AAC | GCA | 3 | C | T |
| TCGA-13-0762 | CADPS2     | ENST00000449022 | p.N265N  | c.795C>T  | Verified   | GAT | AAC | GCA | 3 | C | T |
| TCGA-24-2024 | CAGE1_ENS  | ENST00000338150 | p.Q456*  | c.1366C>T | Verified   | CTA | CAA | CAA | 1 | C | T |
| TCGA-13-1496 | CALCR      | ENST00000394441 | p.R45*   | c.133C>T  | Verified   | GGA | CGA | AAG | 1 | C | T |
| TCGA-24-2035 | CAMSAP1    | ENST00000389532 | p.H934Y  | c.2800C>T | Verified   | GAG | CAC | TTT | 1 | C | T |
| TCGA-24-1563 | CAMTA1     | ENST00000303635 | p.S44S   | c.132C>T  | Verified   | AAC | AGC | AAT | 3 | C | T |
| TCGA-25-1326 | CAPN11     | ENST00000398776 | p.Q450*  | c.1348C>T | Verified   | ATG | CAG | AAG | 1 | C | T |
| TCGA-30-1855 | CAPN9      | ENST00000354537 | p.P484S  | c.1450C>T | Unverified | AAG | CCA | ACT | 1 | C | T |
| TCGA-30-1855 | CAPN9_ENS  | ENST00000271971 | p.P510S  | c.1528C>T | Unverified | AAG | CCA | ACT | 1 | C | T |
| TCGA-29-2427 | CARD11     | ENST00000396946 | p.I573I  | c.1719C>T | Verified   | TCC | ATC | GTC | 3 | C | T |
| TCGA-09-1674 | CARD14     | ENST00000573882 | p.P506L  | c.1517C>T | Unverified | ATC | CCG | GAG | 2 | C | T |
| TCGA-61-2012 | CARD14     | ENST00000573882 | p.I586I  | c.1758C>T | Verified   | GTC | ATC | GGC | 3 | C | T |
| TCGA-09-1674 | CARD14_EN  | ENST00000309710 | p.P269L  | c.806C>T  | Unverified | ATC | CCG | GAG | 2 | C | T |
| TCGA-61-1907 | CARKD      | ENST00000309957 | p.A193A  | c.579C>T  | Unverified | CCG | GCC | CTC | 3 | C | T |
| TCGA-61-2009 | CARTPT     | ENST00000296777 | p.S42F   | c.125C>T  | Verified   | TAC | TCT | GCC | 2 | C | T |
| TCGA-23-1032 | CASKIN1    | ENST00000343516 | p.S366L  | c.1097C>T | Unverified | TCA | TCG | GGA | 2 | C | T |
| TCGA-23-1032 | CASKIN1_EN | ENST00000382453 | p.S195L  | c.584C>T  | Unverified | TCA | TCG | GGA | 2 | C | T |
| TCGA-29-1699 | CASP8      | ENST00000264275 | p.P451L  | c.1352C>T | Unverified | TGT | CCT | CGA | 2 | C | T |
| TCGA-29-1699 | CASP8_ENS1 | ENST00000264275 | p.P451L  | c.1352C>T | Unverified | TGT | CCT | CGA | 2 | C | T |
| TCGA-29-1699 | CASP8_ENS1 | ENST00000358485 | p.P493L  | c.1478C>T | Unverified | TGT | CCT | CGA | 2 | C | T |
| TCGA-09-1665 | CASR       | ENST00000296154 | p.R1041W | c.3121C>T | Verified   | CAG | CGG | CCA | 1 | C | T |

|              |           |                 |          |           |            |     |     |     |   |   |   |
|--------------|-----------|-----------------|----------|-----------|------------|-----|-----|-----|---|---|---|
| TCGA-24-0975 | CASZ1     | ENST00000377022 | p.F1280F | c.3840C>T | Unverified | TAC | TTC | ACC | 3 | C | T |
| TCGA-61-1906 | CATSPER1  | ENST00000312106 | p.N4N    | c.12C>T   | Unverified | CAA | AAC | TCA | 3 | C | T |
| TCGA-61-1906 | CATSPER1  | ENST00000312106 | p.N4N    | c.12C>T   | Unverified | CAA | AAC | TCA | 3 | C | T |
| TCGA-23-1031 | CATSPERG  | ENST00000312265 | p.S768F  | c.2303C>T | Verified   | CCG | TCT | CTG | 2 | C | T |
| TCGA-61-2012 | CBLL1     | ENST00000440859 | p.Q279*  | c.835C>T  | Verified   | AGT | CAG | GAA | 1 | C | T |
| TCGA-23-1022 | CBLL1     | ENST00000440859 | p.L30L   | c.90C>T   | Verified   | AAG | CTC | ATC | 3 | C | T |
| TCGA-13-0905 | CC2D1B    | ENST00000371586 | p.R534W  | c.1600C>T | Verified   | GTG | CGG | GAG | 1 | C | T |
| TCGA-61-2102 | CCBL1     | ENST00000302586 | p.R174C  | c.520C>T  | Verified   | TCA | CGC | ACC | 1 | C | T |
| TCGA-13-0893 | CCDC102B  | ENST00000360242 | p.L426F  | c.1276C>T | Verified   | AAC | CTT | CAA | 1 | C | T |
| TCGA-23-1110 | CCDC113   | ENST00000219299 | p.S6F    | c.17C>T   | Unverified | GAG | TCC | GAG | 2 | C | T |
| TCGA-24-1844 | CCDC129   | ENST00000407970 | p.I643I  | c.1929C>T | Unverified | TGT | ATC | CCC | 3 | C | T |
| TCGA-24-2290 | CCDC136   | ENST00000397697 | p.R354W  | c.1060C>T | Verified   | CTT | CGG | TTT | 1 | C | T |
| TCGA-24-2290 | CCDC136   | ENST00000397697 | p.R354W  | c.1060C>T | Verified   | CTT | CGG | TTT | 1 | C | T |
| TCGA-61-1907 | CCDC137   | ENST00000329214 | p.T93I   | c.278C>T  | Unverified | GTG | ACC | TTC | 2 | C | T |
| TCGA-25-2392 | CCDC141   | ENST00000343876 | p.P875S  | c.2623C>T | Verified   | AAG | CCA | TAA | 1 | C | T |
| TCGA-04-1542 | CCDC144B  | ENST00000360524 | p.C240C  | c.720C>T  | Verified   | GGA | TGC | GAA | 3 | C | T |
| TCGA-61-1910 | CCDC15    | ENST00000344762 | p.Q707*  | c.2119C>T | Unverified | GAC | CAA | GAC | 1 | C | T |
| TCGA-61-1910 | CCDC15_EN | ENST00000344762 | p.Q707*  | c.2119C>T | Unverified | GAC | CAA | GAC | 1 | C | T |
| TCGA-23-1120 | CCDC155   | ENST00000447857 | p.A43V   | c.128C>T  | Verified   | GAA | GCT | TGT | 2 | C | T |
| TCGA-24-2024 | CCDC159   | ENST00000427879 | p.F259F  | c.777C>T  | Verified   | AAG | TTC | CTG | 3 | C | T |
| TCGA-13-1496 | CCDC164   | ENST00000288710 | p.L157L  | c.471C>T  | Verified   | ATG | CTC | AAT | 3 | C | T |
| TCGA-13-0913 | CCDC165   | ENST00000359865 | p.S1269F | c.3806C>T | Verified   | GCC | TCC | CCA | 2 | C | T |
| TCGA-13-0884 | CCDC8     | ENST00000307522 | p.S233S  | c.699C>T  | Verified   | GAG | AGC | GCA | 3 | C | T |
| TCGA-13-0885 | CCDC8     | ENST00000307522 | p.T63T   | c.189C>T  | Verified   | AGC | ACC | CCG | 3 | C | T |
| TCGA-13-0755 | CCDC85A   | ENST00000407595 | p.R131C  | c.391C>T  | Verified   | GGT | CGC | TAC | 1 | C | T |
| TCGA-04-1367 | CCDC88C   | ENST00000389857 | p.R1425C | c.4273C>T | Verified   | GAA | CGC | TTA | 1 | C | T |
| TCGA-25-2042 | CCDC94    | ENST00000262962 | p.Y77Y   | c.231C>T  | Unverified | TTT | TAC | ATC | 3 | C | T |
| TCGA-20-0991 | CCNB3     | ENST00000376042 | p.S361F  | c.1082C>T | Verified   | GAT | TCC | CTT | 2 | C | T |
| TCGA-20-0991 | CCNB3_ENS | ENST00000376042 | p.S361F  | c.1082C>T | Verified   | GAT | TCC | CTT | 2 | C | T |
| TCGA-29-1785 | CCNYL2_EN | ENST00000426433 | p.Q19*   | c.55C>T   | Unverified | CAC | CAG | CAC | 1 | C | T |
| TCGA-29-1785 | CCNYL2_EN | ENST00000426433 | p.Q19*   | c.55C>T   | Unverified | CAC | CAG | CAC | 1 | C | T |
| TCGA-29-1703 | CCR2      | ENST00000292301 | p.N234N  | c.702C>T  | Unverified | CGA | AAC | GAG | 3 | C | T |
| TCGA-29-1703 | CCR2_ENST | ENST00000445132 | p.N234N  | c.702C>T  | Unverified | CGA | AAC | GAG | 3 | C | T |
| TCGA-20-1687 | CCT8L2    | ENST00000359963 | p.T258M  | c.773C>T  | Unverified | GCA | ACG | GCC | 2 | C | T |

|              |           |                 |          |           |            |     |     |     |   |   |   |
|--------------|-----------|-----------------|----------|-----------|------------|-----|-----|-----|---|---|---|
| TCGA-61-1914 | CD163L1   | ENST00000313599 | p.P199L  | c.596C>T  | Unverified | TGT | CCA | TCT | 2 | C | T |
| TCGA-13-0923 | CD1C      | ENST00000368170 | p.L12F   | c.34C>T   | Verified   | CTT | CTT | CTC | 1 | C | T |
| TCGA-61-1737 | CD2       | ENST00000369478 | p.P338S  | c.1012C>T | Unverified | CCT | CCC | CAT | 1 | C | T |
| TCGA-09-2050 | CD22      | ENST00000085219 | p.S320L  | c.959C>T  | Verified   | AGG | TCG | GAA | 2 | C | T |
| TCGA-13-1509 | CD2AP     | ENST00000359314 | p.R504C  | c.1510C>T | Verified   | GGC | CGT | TTC | 1 | C | T |
| TCGA-13-1488 | CD3D      | ENST00000300692 | p.D54D   | c.162C>T  | Verified   | TCA | GAC | ATT | 3 | C | T |
| TCGA-61-2094 | CD48      | ENST00000368046 | p.T24T   | c.72C>T   | Unverified | GTG | ACC | AGC | 3 | C | T |
| TCGA-29-1695 | CD68      | ENST00000250092 | p.T161M  | c.482C>T  | Unverified | TAC | ACG | TGG | 2 | C | T |
| TCGA-25-1318 | CD79A     | ENST00000221972 | p.F52F   | c.156C>T  | Verified   | CAC | TTC | CAA | 3 | C | T |
| TCGA-25-1318 | CD79A     | ENST00000221972 | p.F52F   | c.156C>T  | Verified   | CAC | TTC | CAA | 3 | C | T |
| TCGA-13-0923 | CD84      | ENST00000368054 | p.R84W   | c.250C>T  | Verified   | GAA | CGG | ATA | 1 | C | T |
| TCGA-20-1683 | CD97      | ENST00000242786 | p.G606G  | c.1818C>T | Unverified | GGC | GGC | CAG | 3 | C | T |
| TCGA-61-1904 | CDC20B    | ENST00000296733 | p.S87F   | c.260C>T  | Unverified | TCC | TCT | GAT | 2 | C | T |
| TCGA-13-1507 | CDCA4     | ENST00000392590 | p.R67W   | c.199C>T  | Verified   | GTC | CGG | CAG | 1 | C | T |
| TCGA-29-1766 | CDH11     | ENST00000268603 | p.P504S  | c.1510C>T | Unverified | AAG | CCA | CTT | 1 | C | T |
| TCGA-30-1855 | CDH18     | ENST00000382275 | p.T757M  | c.2270C>T | Unverified | GCA | ACG | ACA | 2 | C | T |
| TCGA-30-1855 | CDH18_ENS | ENST00000507958 | p.T757M  | c.2270C>T | Unverified | GCA | ACG | ACA | 2 | C | T |
| TCGA-13-0923 | CDH23     | ENST00000398860 | p.P2316S | c.6946C>T | Verified   | ACC | CCT | GGG | 1 | C | T |
| TCGA-61-2113 | CDH23     | ENST00000398860 | p.I920I  | c.2760C>T | Unverified | GCC | ATC | GAC | 3 | C | T |
| TCGA-23-1032 | CDH4      | ENST00000360469 | p.R194W  | c.580C>T  | Verified   | ATC | CGG | TCC | 1 | C | T |
| TCGA-23-1114 | CDH4      | ENST00000360469 | p.Y581Y  | c.1743C>T | Unverified | GTC | TAC | GAG | 3 | C | T |
| TCGA-23-1021 | CDH7      | ENST00000323011 | p.A742V  | c.2225C>T | Verified   | GTT | GCT | GAA | 2 | C | T |
| TCGA-30-1857 | CDH7      | ENST00000323011 | p.P357L  | c.1070C>T | Unverified | GGT | CCG | TTC | 2 | C | T |
| TCGA-61-1738 | CDH7      | ENST00000323011 | p.D588D  | c.1764C>T | Unverified | GCT | GAC | GGC | 3 | C | T |
| TCGA-61-1738 | CDH7      | ENST00000323011 | p.D588D  | c.1764C>T | Unverified | GCT | GAC | GGC | 3 | C | T |
| TCGA-30-1857 | CDH7_ENST | ENST00000323011 | p.P357L  | c.1070C>T | Unverified | GGT | CCG | TTC | 2 | C | T |
| TCGA-61-1738 | CDH7_ENST | ENST00000323011 | p.D588D  | c.1764C>T | Unverified | GCT | GAC | GGC | 3 | C | T |
| TCGA-61-1738 | CDH7_ENST | ENST00000323011 | p.D588D  | c.1764C>T | Unverified | GCT | GAC | GGC | 3 | C | T |
| TCGA-29-1691 | CDH8      | ENST00000577390 | p.P79L   | c.236C>T  | Unverified | GAA | CCG | ATT | 2 | C | T |
| TCGA-24-1616 | CDH8      | ENST00000577390 | p.Y775Y  | c.2325C>T | Verified   | GAC | TAC | CTC | 3 | C | T |
| TCGA-29-1711 | CDK12     | NM_016507       | p.P653L  | c.1958C>T | Unverified | aaa | cct | gtg | 2 | C | T |
| TCGA-29-1711 | CDK12     | NM_016507       | p.P653L  | c.1958C>T | Unverified | aaa | cct | gtg | 2 | C | T |
| TCGA-10-0930 | CDK5R1    | ENST00000313401 | p.P174P  | c.522C>T  | Verified   | gac | ccc | gtg | 3 | C | T |
| TCGA-10-0930 | CDK5R1    | ENST00000313401 | p.P174P  | c.522C>T  | Verified   | gac | ccc | gtg | 3 | C | T |

|              |            |                   |          |           |            |     |     |     |   |   |   |
|--------------|------------|-------------------|----------|-----------|------------|-----|-----|-----|---|---|---|
| TCGA-20-0990 | CDK5RAP1   | ENST00000346416   | p.R169W  | c.505C>T  | Verified   | agg | cgg | ccc | 1 | C | T |
| TCGA-29-1690 | CDK5RAP2   | ENST00000349780   | p.S613S  | c.1839C>T | Unverified | atc | agc | gaa | 3 | C | T |
| TCGA-29-1703 | CDK6       | ENST00000265734   | p.Y196Y  | c.588C>T  | Unverified | agc | tac | gcc | 3 | C | T |
| TCGA-09-1665 | CDKL1      | ENST00000395834   | p.L222L  | c.666C>T  | Verified   | GAT | CTC | ATT | 3 | C | T |
| TCGA-20-1687 | CDRT1_ENS  | ENST00000395906   | p.S235F  | c.704C>T  | Unverified | ATA | TCC | GAA | 2 | C | T |
| TCGA-24-1464 | CDX1       | ENST00000231656   | p.T162T  | c.486C>T  | Verified   | TAC | ACC | GAC | 3 | C | T |
| TCGA-04-1337 | CEACAM18_  | ENST00000451626   | p.R27*   | c.79C>T   | Verified   | AGA | CGA | GAC | 1 | C | T |
| TCGA-25-2401 | CEACAM8    | ENST00000244336   | p.L202L  | c.604C>T  | Verified   | ACT | CTA | CTC | 1 | C | T |
| TCGA-29-1776 | CECR1      | ENST00000399837   | p.P193S  | c.577C>T  | Unverified | CAC | CCG | GAG | 1 | C | T |
| TCGA-24-1846 | CECR2      | ENST00000400585   | p.A360V  | c.1079C>T | Unverified | AGG | GCA | TGG | 2 | C | T |
| TCGA-20-1687 | CECR2      | ENST00000400585   | p.H785H  | c.2355C>T | Unverified | GGT | CAC | GTG | 3 | C | T |
| TCGA-24-1846 | CECR2_ENS1 | ENST00000262608   | p.A361V  | c.1082C>T | Unverified | ATG | TCT | GAT | 2 | C | T |
| TCGA-20-1687 | CECR2_ENS1 | ENST00000262608   | p.H786H  | c.2358C>T | Unverified | TCA | GCC | CCC | 3 | C | T |
| TCGA-04-1336 | CELA2A     | ENST00000359621   | p.S195S  | c.585C>T  | Verified   | AGC | AGC | GTG | 3 | C | T |
| TCGA-25-2392 | CELF4      | ENST00000361795   | p.A308V  | c.923C>T  | Verified   | CTG | GCG | GCC | 2 | C | T |
| TCGA-25-2393 | CELSR2     | ENST00000271332   | p.A687V  | c.2060C>T | Verified   | ACC | GCC | TCC | 2 | C | T |
| TCGA-61-1725 | CENPE      | ENST00000265148.1 | p.R290*  | c.868C>T  | Unverified | aca | cga | att | 1 | C | T |
| TCGA-13-0883 | CENPF      | ENST00000366955   | p.Q541*  | c.1621C>T | Verified   | CTT | CAA | GAA | 1 | C | T |
| TCGA-13-1509 | CENPF      | ENST00000366955   | p.L1300L | c.3898C>T | Verified   | AAG | CTG | AAT | 1 | C | T |
| TCGA-30-1891 | CENPJ      | ENST00000381884   | p.D49D   | c.147C>T  | Unverified | GTG | GAC | ATT | 3 | C | T |
| TCGA-23-1809 | CEP170     | ENST00000366542   | p.R956*  | c.2866C>T | Unverified | AAG | CGA | AAG | 1 | C | T |
| TCGA-13-0755 | CEP170     | ENST00000366542   | p.T565I  | c.1694C>T | Verified   | ACT | ACA | TCT | 2 | C | T |
| TCGA-30-1714 | CEP290     | ENST00000552810   | p.R2112W | c.6334C>T | Unverified | CAG | CGG | AAA | 1 | C | T |
| TCGA-24-1423 | CEP72      | ENST00000264935   | p.H150Y  | c.448C>T  | Verified   | CTG | CAT | TTT | 1 | C | T |
| TCGA-61-2012 | CEP78      | ENST00000277082   | p.L613L  | c.1839C>T | Verified   | CCT | CTC | GAC | 3 | C | T |
| TCGA-20-0990 | CERCAM     | ENST00000372842   | p.L455L  | c.1365C>T | Unverified | CTG | CTC | GCT | 3 | C | T |
| TCGA-25-2398 | CETN1      | ENST00000327228   | p.R164W  | c.490C>T  | Verified   | CTT | CGG | ATC | 1 | C | T |
| TCGA-29-1695 | CFB        | ENST00000425368   | p.H737H  | c.2211C>T | Unverified | GCT | CAC | GCC | 3 | C | T |
| TCGA-29-1763 | CHD3       | ENST00000330494   | p.S1902S | c.5706C>T | Unverified | CGC | AGC | ATC | 3 | C | T |
| TCGA-04-1651 | CHD6       | ENST00000373233   | p.Q1861* | c.5581C>T | Unverified | agt | cag | aac | 1 | C | T |
| TCGA-04-1651 | CHD6       | ENST00000373233   | p.Q1861* | c.5581C>T | Unverified | agt | cag | aac | 1 | C | T |
| TCGA-09-2051 | CHD9       | NM_025134.3       | p.Q230*  | c.688C>T  | Unverified | cag | caa | ttt | 1 | C | T |
| TCGA-09-0369 | CHEK2      | ENST00000328354   | p.P536L  | c.1607C>T | Unverified | cgc | cca | gct | 2 | C | T |
| TCGA-09-0369 | CHEK2      | ENST00000328354   | p.P536L  | c.1607C>T | Unverified | cgc | cca | gct | 2 | C | T |



|              |            |                 |          |           |            |     |     |     |   |   |   |
|--------------|------------|-----------------|----------|-----------|------------|-----|-----|-----|---|---|---|
| TCGA-13-0755 | CHEK2      | ENST00000328354 | p.P536L  | c.1607C>T | Unverified | cgc | cca | gct | 2 | C | T |
| TCGA-13-0760 | CHEK2      | ENST00000328354 | p.P536L  | c.1607C>T | Unverified | cgc | cca | gct | 2 | C | T |
| TCGA-24-1850 | CHEK2      | ENST00000328354 | p.T45M   | c.134C>T  | Unverified | agc | acg | atg | 2 | C | T |
| TCGA-09-0369 | CHEK2      | ENST00000328354 | p.P522P  | c.1566C>T | Unverified | cgg | ccc | cgt | 3 | C | T |
| TCGA-09-0369 | CHEK2      | ENST00000328354 | p.P522P  | c.1566C>T | Unverified | cgg | ccc | cgt | 3 | C | T |
| TCGA-13-0755 | CHEK2      | ENST00000328354 | p.P522P  | c.1566C>T | Unverified | cgg | ccc | cgt | 3 | C | T |
| TCGA-13-0760 | CHEK2      | ENST00000328354 | p.P522P  | c.1566C>T | Unverified | cgg | ccc | cgt | 3 | C | T |
| TCGA-13-0762 | CHEK2      | ENST00000328354 | p.P522P  | c.1566C>T | Unverified | cgg | ccc | cgt | 3 | C | T |
| TCGA-13-0762 | CHEK2      | ENST00000328354 | p.P522P  | c.1566C>T | Unverified | cgg | ccc | cgt | 3 | C | T |
| TCGA-20-1683 | CHGB       | ENST00000378961 | p.Y526Y  | c.1578C>T | Unverified | TAC | TAC | GAC | 3 | C | T |
| TCGA-23-2078 | CHKB       | ENST00000406938 | p.G112G  | c.336C>T  | Unverified | CAG | GGC | GTG | 3 | C | T |
| TCGA-13-0761 | CHMP6      | ENST00000325167 | p.A195V  | c.584C>T  | Verified   | CAG | GCG | GAG | 2 | C | T |
| TCGA-13-0761 | CHMP6      | ENST00000325167 | p.A195V  | c.584C>T  | Verified   | CAG | GCG | GAG | 2 | C | T |
| TCGA-13-0920 | CHRNA2     | ENST00000407991 | p.R61W   | c.181C>T  | Verified   | GAC | CGG | CTC | 1 | C | T |
| TCGA-09-2049 | CHRNA3     | ENST00000326828 | p.S423F  | c.1268C>T | Verified   | AGC | TCT | AGT | 2 | C | T |
| TCGA-24-2267 | CHST2      | ENST00000309575 | p.A391V  | c.1172C>T | Verified   | CAC | GCT | CTG | 2 | C | T |
| TCGA-04-1362 | CHUK       | ENST00000370397 | p.S263S  | c.789C>T  | Verified   | AAT | AGC | CTT | 3 | C | T |
| TCGA-61-1998 | CIC        | ENST00000160740 | p.S1389F | c.4166C>T | Unverified | GGC | TCT | TAC | 2 | C | T |
| TCGA-24-1846 | CIDEB      | ENST00000258807 | p.D85D   | c.255C>T  | Unverified | GTG | GAC | AGT | 3 | C | T |
| TCGA-29-2427 | CLASP1     | ENST00000263710 | p.A344V  | c.1031C>T | Verified   | AAT | GCT | CTA | 2 | C | T |
| TCGA-23-1116 | CLCN1      | ENST00000343257 | p.R47W   | c.139C>T  | Unverified | CTC | CGG | AAG | 1 | C | T |
| TCGA-04-1651 | CLCN7      | ENST00000382745 | p.S232S  | c.696C>T  | Unverified | GTG | TCC | GGT | 3 | C | T |
| TCGA-04-1651 | CLCN7      | ENST00000382745 | p.S232S  | c.696C>T  | Unverified | GTG | TCC | GGT | 3 | C | T |
| TCGA-13-0791 | CLCNKA     | ENST00000331433 | p.L94F   | c.280C>T  | Unverified | TAT | CTT | TCC | 1 | C | T |
| TCGA-29-1701 | CLCNKB     | ENST00000375679 | p.L444L  | c.1332C>T | Unverified | ACT | CTC | TCT | 3 | C | T |
| TCGA-61-1740 | CLEC17A_EM | ENST00000417570 | p.P100S  | c.298C>T  | Unverified | AGA | CCT | CCA | 1 | C | T |
| TCGA-29-1693 | CLEC18B    | ENST00000339953 | p.T151M  | c.452C>T  | Unverified | TAC | ACG | CAG | 2 | C | T |
| TCGA-30-1857 | CLEC18B    | ENST00000339953 | p.A79A   | c.237C>T  | Unverified | CTG | GCC | CAA | 3 | C | T |
| TCGA-04-1362 | CLGN       | ENST00000325617 | p.S579F  | c.1736C>T | Verified   | AAG | TCT | GGG | 2 | C | T |
| TCGA-13-1489 | CLIC5      | ENST00000339561 | p.N220N  | c.660C>T  | Verified   | AAG | AAC | GCC | 3 | C | T |
| TCGA-24-2035 | CLINT1     | ENST00000523094 | p.T240M  | c.719C>T  | Verified   | GTG | ACG | ACA | 2 | C | T |
| TCGA-24-1843 | CLIP1      | ENST00000358808 | p.S147L  | c.440C>T  | Unverified | ACT | TCA | CCG | 2 | C | T |
| TCGA-04-1338 | CLIP4      | ENST00000320081 | p.A254V  | c.761C>T  | Verified   | GAT | GCG | GTG | 2 | C | T |
| TCGA-13-0923 | CLK4       | ENST00000316308 | p.R2W    | c.4C>T    | Verified   | ATG | CGG | CAT | 1 | C | T |

|              |           |                 |          |           |            |     |     |     |   |   |   |
|--------------|-----------|-----------------|----------|-----------|------------|-----|-----|-----|---|---|---|
| TCGA-13-0885 | CLN5      | ENST00000377453 | p.F206F  | c.618C>T  | Verified   | CCT | TTC | TGG | 3 | C | T |
| TCGA-13-0923 | CLPP      | ENST00000245816 | p.I177I  | c.531C>T  | Unverified | ATG | ATC | CAC | 3 | C | T |
| TCGA-29-1698 | CLPTM1L   | ENST00000320895 | p.S261S  | c.783C>T  | Unverified | TAC | TCC | CTG | 3 | C | T |
| TCGA-30-1857 | CLSTN2    | ENST00000458420 | p.T170M  | c.509C>T  | Unverified | GTG | ACG | GAG | 2 | C | T |
| TCGA-04-1362 | CLU       | NM_001831.2     | p.R250W  | c.748C>T  | Verified   | acc | cgg | gag | 1 | C | T |
| TCGA-04-1338 | CLU       | NM_001831.2     | p.P286L  | c.857C>T  | Verified   | tct | ccg | tac | 2 | C | T |
| TCGA-13-0760 | CLUAP1    | ENST00000576634 | p.D257D  | c.771C>T  | Verified   | TAT | GAC | ACT | 3 | C | T |
| TCGA-13-1497 | CMYA5     | ENST00000238522 | p.T2592I | c.7775C>T | Verified   | GCT | ACA | TCA | 2 | C | T |
| TCGA-29-1703 | CNBD1     | ENST00000518476 | p.R380*  | c.1138C>T | Unverified | CTA | CGA | TCA | 1 | C | T |
| TCGA-29-1703 | CNBD1_ENS | ENST00000518476 | p.R380*  | c.1138C>T | Unverified | CTA | CGA | TCA | 1 | C | T |
| TCGA-23-1122 | CNDP2     | ENST00000324262 | p.A465V  | c.1394C>T | Verified   | GCC | GCG | TAC | 2 | C | T |
| TCGA-24-2288 | CNGA1     | ENST00000358519 | p.R643*  | c.1927C>T | Unverified | GCC | CGA | ATC | 1 | C | T |
| TCGA-13-0913 | CNGA3     | ENST00000272602 | p.T654I  | c.1961C>T | Verified   | GCC | ACC | CAG | 2 | C | T |
| TCGA-23-1111 | CNGA3     | ENST00000272602 | p.T565M  | c.1694C>T | Unverified | AGG | ACG | GCC | 2 | C | T |
| TCGA-29-1761 | CNGA3     | ENST00000272602 | p.P683P  | c.2049C>T | Unverified | GTT | CCC | GGG | 3 | C | T |
| TCGA-61-2095 | CNGA3     | ENST00000272602 | p.V382V  | c.1146C>T | Verified   | GTG | GTC | GTA | 3 | C | T |
| TCGA-61-1910 | CNGA4     | ENST00000379936 | p.I487I  | c.1461C>T | Unverified | GAG | ATC | GCC | 3 | C | T |
| TCGA-61-1907 | CNGB1     | ENST00000251102 | p.N653N  | c.1959C>T | Unverified | ACC | AAC | CTG | 3 | C | T |
| TCGA-23-1032 | CNIH4     | ENST00000465271 | p.S28F   | c.83C>T   | Unverified | TTG | TCT | GAT | 2 | C | T |
| TCGA-61-1740 | CNKSR1    | ENST00000361530 | p.L585L  | c.1753C>T | Unverified | CTC | CTA | GGC | 1 | C | T |
| TCGA-23-1114 | CNN3      | ENST00000370206 | p.G326G  | c.978C>T  | Unverified | CAA | GGC | ATT | 3 | C | T |
| TCGA-13-1510 | CNPY1     | ENST00000321736 | p.L63F   | c.187C>T  | Unverified | TCA | CTT | ATC | 1 | C | T |
| TCGA-13-0900 | CNPY3     | ENST00000372836 | p.N153N  | c.459C>T  | Verified   | TGG | AAC | GAG | 3 | C | T |
| TCGA-29-1693 | CNR1      | ENST00000369499 | p.I348I  | c.1044C>T | Unverified | CTG | ATC | CTG | 3 | C | T |
| TCGA-13-1509 | CNTN4     | ENST00000397459 | p.L134F  | c.400C>T  | Verified   | AAC | CTC | AGA | 1 | C | T |
| TCGA-61-1899 | CNTNAP2   | ENST00000361727 | p.N379N  | c.1137C>T | Unverified | TTC | AAC | GCT | 3 | C | T |
| TCGA-04-1655 | CNTNAP5   | ENST00000431078 | p.R1302W | c.3904C>T | Unverified | AAA | CGG | GAA | 1 | C | T |
| TCGA-61-1740 | COG7      | ENST00000307149 | p.F324F  | c.972C>T  | Unverified | CAC | TTC | GCC | 3 | C | T |
| TCGA-04-1331 | COL15A1   | ENST00000375001 | p.S37F   | c.110C>T  | Verified   | GCT | TCC | CAG | 2 | C | T |
| TCGA-04-1652 | COL16A1   | ENST00000373672 | p.P764P  | c.2292C>T | Unverified | CAA | CCC | GGT | 3 | C | T |
| TCGA-04-1652 | COL16A1   | ENST00000373672 | p.P764P  | c.2292C>T | Unverified | CAA | CCC | GGT | 3 | C | T |
| TCGA-23-1116 | COL22A1   | ENST00000303045 | p.R216C  | c.646C>T  | Unverified | CGC | CGT | CTT | 1 | C | T |
| TCGA-13-1496 | COL22A1   | ENST00000303045 | p.G508G  | c.1524C>T | Verified   | GTT | GGC | GCT | 3 | C | T |
| TCGA-20-0991 | COL22A1   | ENST00000303045 | p.G178G  | c.534C>T  | Verified   | GTG | GGC | GAG | 3 | C | T |

|              |           |                 |          |           |            |     |     |     |   |   |   |
|--------------|-----------|-----------------|----------|-----------|------------|-----|-----|-----|---|---|---|
| TCGA-30-1857 | COL23A1   | ENST00000390654 | p.G424G  | c.1272C>T | Unverified | ATG | GGC | CTC | 3 | C | T |
| TCGA-25-1313 | COL25A1   | ENST00000399132 | p.R364W  | c.1090C>T | Verified   | GAA | CGG | GGG | 1 | C | T |
| TCGA-13-1505 | COL27A1   | ENST00000356083 | p.R1611W | c.4831C>T | Verified   | GGG | CGG | CCC | 1 | C | T |
| TCGA-61-2113 | COL27A1   | ENST00000356083 | p.G775G  | c.2325C>T | Verified   | CGA | GGC | CTG | 3 | C | T |
| TCGA-23-1124 | COL2A1    | ENST00000337299 | p.R265W  | c.793C>T  | Verified   | GGA | CGG | ACT | 1 | C | T |
| TCGA-13-0884 | COL4A1    | ENST00000375820 | p.P1367S | c.4099C>T | Verified   | GGC | CCC | CCA | 1 | C | T |
| TCGA-13-0791 | COL4A2    | ENST00000360467 | p.P164S  | c.490C>T  | Verified   | GGA | CCA | AAA | 1 | C | T |
| TCGA-25-2393 | COL4A4    | ENST00000396625 | p.P1174L | c.3521C>T | Verified   | TCA | CCT | GGC | 2 | C | T |
| TCGA-29-1784 | COL4A6    | ENST00000334504 | p.P1554P | c.4662C>T | Unverified | ATG | CCC | GTC | 3 | C | T |
| TCGA-24-2288 | COL5A2    | ENST00000374866 | p.P659S  | c.1975C>T | Unverified | CCG | CCG | GGT | 1 | C | T |
| TCGA-29-1699 | COL5A2    | ENST00000374866 | p.T434M  | c.1301C>T | Unverified | CCA | ACG | GGC | 2 | C | T |
| TCGA-29-1691 | COL5A3    | ENST00000264828 | p.P299L  | c.896C>T  | Unverified | CTG | CCT | CCG | 2 | C | T |
| TCGA-30-1855 | COL5A3    | ENST00000264828 | p.A125V  | c.374C>T  | Unverified | CCA | GCG | CTG | 2 | C | T |
| TCGA-20-0990 | COL6A2    | ENST00000300527 | p.R933C  | c.2797C>T | Unverified | CCG | CGT | GGC | 1 | C | T |
| TCGA-24-1843 | COL6A3    | ENST00000295550 | p.R1727W | c.5179C>T | Unverified | CTG | CGG | GTA | 1 | C | T |
| TCGA-30-1714 | COL6A3    | ENST00000295550 | p.R1742W | c.5224C>T | Unverified | CAG | CGG | GTC | 1 | C | T |
| TCGA-29-1781 | COL6A3    | ENST00000295550 | p.S454F  | c.1361C>T | Unverified | TCA | TCT | GCA | 2 | C | T |
| TCGA-29-1775 | COL6A3    | ENST00000295550 | p.P8P    | c.24C>T   | Unverified | TTG | CCC | TTA | 3 | C | T |
| TCGA-29-1781 | COL6A3_EN | ENST00000392004 | p.S248F  | c.743C>T  | Unverified | TCA | TCT | GCA | 2 | C | T |
| TCGA-29-1775 | COL6A3_EN | ENST00000392004 | p.P8P    | c.24C>T   | Unverified | TTG | CCC | TTA | 3 | C | T |
| TCGA-61-2009 | COL6A6    | ENST00000358511 | p.T932M  | c.2795C>T | Verified   | GCC | ACG | GCA | 2 | C | T |
| TCGA-13-0883 | COL6A6    | ENST00000358511 | p.A1867A | c.5601C>T | Verified   | ATC | GCC | ACA | 3 | C | T |
| TCGA-24-2288 | COL7A1    | ENST00000328333 | p.G1863G | c.5589C>T | Unverified | TCA | GGC | GCC | 3 | C | T |
| TCGA-04-1331 | COL9A1    | ENST00000357250 | p.R352C  | c.1054C>T | Verified   | TCG | CGT | GGA | 1 | C | T |
| TCGA-24-1604 | COL9A2    | ENST00000372748 | p.G340G  | c.1020C>T | Verified   | CCA | GGC | CAG | 3 | C | T |
| TCGA-24-1846 | COLQ      | ENST00000383788 | p.D395D  | c.1185C>T | Unverified | GGT | GAC | GAC | 3 | C | T |
| TCGA-24-1846 | COLQ_ENST | ENST00000383781 | p.D385D  | c.1155C>T | Unverified | GGT | GAC | GAC | 3 | C | T |
| TCGA-24-1464 | COMMMD10  | ENST00000274458 | p.V110V  | c.330C>T  | Verified   | TTT | GTC | AAT | 3 | C | T |
| TCGA-20-0991 | COPA      | ENST00000241704 | p.P594L  | c.1781C>T | Verified   | GAT | CCC | ACT | 2 | C | T |
| TCGA-24-1845 | CORO2A    | ENST00000343933 | p.S28F   | c.83C>T   | Unverified | gac | tcc | gtg | 2 | C | T |
| TCGA-29-1699 | CORO2B    | ENST00000566799 | p.R474C  | c.1420C>T | Unverified | TTG | CGC | AAC | 1 | C | T |
| TCGA-24-1104 | COX6B1_EN | ENST00000392201 | p.Q6*    | c.16C>T   | Verified   | CCT | CAG | ATA | 1 | C | T |
| TCGA-25-2392 | CPA1      | ENST00000011292 | p.L210L  | c.630C>T  | Verified   | ATT | CTC | GAC | 3 | C | T |
| TCGA-61-1895 | CPA2      | ENST00000222481 | p.R394C  | c.1180C>T | Unverified | GCC | CGT | CAG | 1 | C | T |

|              |            |                 |          |           |            |     |     |     |   |   |   |
|--------------|------------|-----------------|----------|-----------|------------|-----|-----|-----|---|---|---|
| TCGA-13-0793 | CPA5       | ENST00000393213 | p.P73S   | c.217C>T  | Verified   | GGC | CCA | GCC | 1 | C | T |
| TCGA-24-2280 | CPA5       | ENST00000393213 | p.R335*  | c.1003C>T | Unverified | GGC | CGA | TTG | 1 | C | T |
| TCGA-23-1123 | CPB1       | ENST00000282957 | p.R152C  | c.454C>T  | Verified   | GGA | CGC | GCT | 1 | C | T |
| TCGA-23-1123 | CPB1       | ENST00000282957 | p.R152C  | c.454C>T  | Verified   | GGA | CGC | GCT | 1 | C | T |
| TCGA-13-0714 | CPN2       | ENST00000323830 | p.P49L   | c.146C>T  | Verified   | CCG | CCA | TAT | 2 | C | T |
| TCGA-29-1777 | CPNE6      | ENST00000397016 | p.P334P  | c.1002C>T | Unverified | CAG | CCC | AAC | 3 | C | T |
| TCGA-04-1336 | CPXM1      | ENST00000380605 | p.H180Y  | c.538C>T  | Verified   | GGG | CAC | CCC | 1 | C | T |
| TCGA-24-1846 | CPXM2      | ENST00000241305 | p.S662S  | c.1986C>T | Unverified | ATC | TCC | GTA | 3 | C | T |
| TCGA-09-1674 | CPZ        | ENST00000360986 | p.T181I  | c.542C>T  | Unverified | CCC | ACC | TTC | 2 | C | T |
| TCGA-04-1362 | CRB1       | ENST00000367400 | p.H699Y  | c.2095C>T | Verified   | TGC | CAC | AGG | 1 | C | T |
| TCGA-09-2051 | CRB1       | ENST00000367400 | p.T289M  | c.866C>T  | Unverified | TGC | ACG | GGT | 2 | C | T |
| TCGA-20-0991 | CRCT1      | ENST00000368790 | p.C75C   | c.225C>T  | Unverified | GGT | TGC | TGC | 3 | C | T |
| TCGA-61-1915 | CREB3L2    | ENST00000330387 | p.S150F  | c.449C>T  | Unverified | atc | tcc | acc | 2 | C | T |
| TCGA-20-1687 | CRISPLD2   | ENST00000262424 | p.P426L  | c.1277C>T | Unverified | GCT | CCG | GTG | 2 | C | T |
| TCGA-29-1761 | CRLS1      | ENST00000378863 | p.Q297*  | c.889C>T  | Unverified | GTT | CAG | GTG | 1 | C | T |
| TCGA-24-1470 | CRMP1      | ENST00000324989 | p.A375A  | c.1125C>T | Verified   | GCA | GCC | GAC | 3 | C | T |
| TCGA-29-1785 | CROCC      | ENST00000375541 | p.R918W  | c.2752C>T | Unverified | CAA | CGG | CAG | 1 | C | T |
| TCGA-29-1785 | CROCC      | ENST00000375541 | p.R918W  | c.2752C>T | Unverified | CAA | CGG | CAG | 1 | C | T |
| TCGA-61-1998 | CRTC2      | ENST00000368633 | p.R200*  | c.598C>T  | Verified   | AGC | CGA | CGT | 1 | C | T |
| TCGA-29-1695 | CRTC3      | ENST00000268184 | p.R386W  | c.1156C>T | Unverified | CGT | CGG | CAG | 1 | C | T |
| TCGA-04-1331 | CSAD       | ENST00000308926 | p.R379W  | c.1135C>T | Verified   | GAG | CGG | CGC | 1 | C | T |
| TCGA-29-1770 | CSF1R      | ENST00000286301 | p.Q835*  | c.2503C>T | Unverified | GTT | CAG | AGC | 1 | C | T |
| TCGA-29-1770 | CSF1R_ENST | ENST00000286301 | p.Q835*  | c.2503C>T | Unverified | GTT | CAG | AGC | 1 | C | T |
| TCGA-29-1785 | CSF2RA     | ENST00000381529 | p.L27L   | c.79C>T   | Unverified | gat | ctg | cga | 1 | C | T |
| TCGA-29-1785 | CSF2RA     | ENST00000381529 | p.L27L   | c.79C>T   | Unverified | gat | ctg | cga | 1 | C | T |
| TCGA-29-1785 | CSF2RA_ENS | ENST00000355432 | p.L27L   | c.79C>T   | Unverified | GAT | CTG | CGA | 1 | C | T |
| TCGA-29-1785 | CSF2RA_ENS | ENST00000355432 | p.L27L   | c.79C>T   | Unverified | GAT | CTG | CGA | 1 | C | T |
| TCGA-29-1785 | CSF2RA_ENS | ENST00000381509 | p.L27L   | c.79C>T   | Unverified | GAT | CTG | CGA | 1 | C | T |
| TCGA-29-1785 | CSF2RA_ENS | ENST00000381509 | p.L27L   | c.79C>T   | Unverified | GAT | CTG | CGA | 1 | C | T |
| TCGA-04-1649 | CSH2_ENST  | ENST00000392886 | p.R159C  | c.475C>T  | Unverified | AGC | CGC | CGG | 1 | C | T |
| TCGA-04-1638 | CSMD1_ENS  | ENST00000318252 | p.S2904S | c.8712C>T | Unverified | TTC | TTC | CAG | 3 | C | T |
| TCGA-29-1762 | CSMD1_ENS  | ENST00000318252 | p.T2236T | c.6708C>T | Unverified | GAG | TTC | ACT | 3 | C | T |
| TCGA-04-1638 | CSMD1_ENS  | ENST00000537824 | p.S3175S | c.9525C>T | Unverified | AAG | TCC | GAA | 3 | C | T |
| TCGA-04-1652 | CSMD1_ENS  | ENST00000537824 | p.N2867N | c.8601C>T | Unverified | GCC | AAC | GCC | 3 | C | T |

|              |            |                 |          |           |            |     |     |     |   |   |   |
|--------------|------------|-----------------|----------|-----------|------------|-----|-----|-----|---|---|---|
| TCGA-04-1652 | CSMD1_ENS  | ENST00000537824 | p.N2867N | c.8601C>T | Unverified | GCC | AAC | GCC | 3 | C | T |
| TCGA-29-1762 | CSMD1_ENS  | ENST00000537824 | p.T2507T | c.7521C>T | Unverified | TTT | ACC | GGG | 3 | C | T |
| TCGA-20-1686 | CSMD2      | ENST00000241312 | p.Y49Y   | c.147C>T  | Unverified | AAT | TAC | GCC | 3 | C | T |
| TCGA-20-1686 | CSMD2_ENS  | ENST00000373381 | p.Y89Y   | c.267C>T  | Unverified | AAT | TAC | GCC | 3 | C | T |
| TCGA-29-1785 | CSMD3      | ENST00000297405 | p.P141S  | c.421C>T  | Unverified | ctg | cca | cct | 1 | C | T |
| TCGA-29-1785 | CSMD3      | ENST00000297405 | p.P141S  | c.421C>T  | Unverified | ctg | cca | cct | 1 | C | T |
| TCGA-29-1785 | CSMD3_ENS  | ENST00000343508 | p.P101S  | c.301C>T  | Unverified | CTG | CCA | CCT | 1 | C | T |
| TCGA-29-1785 | CSMD3_ENS  | ENST00000343508 | p.P101S  | c.301C>T  | Unverified | CTG | CCA | CCT | 1 | C | T |
| TCGA-13-1481 | CSPG4      | ENST00000308508 | p.F1906F | c.5718C>T | Verified   | gcc | ttc | gtg | 3 | C | T |
| TCGA-13-1488 | CTAGE4     | ENST00000486333 | p.S733F  | c.2198C>T | Unverified | GCT | TCT | CGA | 2 | C | T |
| TCGA-29-1703 | CTC1       | ENST00000315684 | p.P516L  | c.1547C>T | Unverified | GCT | CCG | CCA | 2 | C | T |
| TCGA-04-1649 | CTDSP1     | ENST00000273062 | p.D248D  | c.744C>T  | Unverified | GTG | GAC | GAC | 3 | C | T |
| TCGA-20-0990 | CTNNA3     | NM_013266.1     | p.R297*  | c.889C>T  | Verified   | ata | cga | cca | 1 | C | T |
| TCGA-61-1740 | CTNNA3     | NM_013266.1     | p.T422I  | c.1265C>T | Unverified | cac | acc | agc | 2 | C | T |
| TCGA-04-1652 | CTNNA3     | NM_013266.1     | p.S434S  | c.1302C>T | Unverified | tgt | tcc | atg | 3 | C | T |
| TCGA-04-1652 | CTNNA3     | NM_013266.1     | p.S434S  | c.1302C>T | Unverified | tgt | tcc | atg | 3 | C | T |
| TCGA-61-1740 | CTNNA3_EN  | ENST00000433211 | p.T422I  | c.1265C>T | Unverified | CAC | ACC | AGC | 2 | C | T |
| TCGA-04-1652 | CTNNA3_EN  | ENST00000433211 | p.S434S  | c.1302C>T | Unverified | TGT | TCC | ATG | 3 | C | T |
| TCGA-04-1652 | CTNNA3_EN  | ENST00000433211 | p.S434S  | c.1302C>T | Unverified | TGT | TCC | ATG | 3 | C | T |
| TCGA-20-0990 | CTSL1      | ENST00000343150 | p.H36Y   | c.106C>T  | Verified   | ATG | CAC | AAC | 1 | C | T |
| TCGA-24-2288 | CUL9       | ENST00000252050 | p.R1730C | c.5188C>T | Verified   | GAC | CGT | TTC | 1 | C | T |
| TCGA-04-1367 | CUX2       | ENST00000261726 | p.R1088W | c.3262C>T | Verified   | TCC | CGG | CCC | 1 | C | T |
| TCGA-25-2391 | CUX2       | ENST00000261726 | p.P1256S | c.3766C>T | Unverified | GAC | CCC | ACC | 1 | C | T |
| TCGA-13-0923 | CUZD1      | ENST00000368904 | p.D94D   | c.282C>T  | Verified   | TTT | GAC | GGA | 3 | C | T |
| TCGA-61-1740 | CXCR2      | ENST00000318507 | p.A255V  | c.764C>T  | Unverified | ttt | gct | gtc | 2 | C | T |
| TCGA-13-1509 | CXorf57    | ENST00000372548 | p.P315S  | c.943C>T  | Verified   | GTC | CCC | GTG | 1 | C | T |
| TCGA-23-1110 | CXorf67    | NM_203407.1     | p.T494I  | c.1481C>T | Verified   | agc | aca | gct | 2 | C | T |
| TCGA-24-2262 | CYB5R1     | ENST00000367249 | p.R196W  | c.586C>T  | Verified   | ATC | CGG | GCC | 1 | C | T |
| TCGA-13-0886 | CYP11B2    | ENST00000323110 | p.D335D  | c.1005C>T | Unverified | CCC | GAC | GTG | 3 | C | T |
| TCGA-29-1776 | CYP26B1    | ENST00000001146 | p.R469W  | c.1405C>T | Unverified | ACA | CGG | ACC | 1 | C | T |
| TCGA-20-0990 | CYP2A13    | ENST00000330436 | p.P75S   | c.223C>T  | Verified   | GGG | CCC | CGG | 1 | C | T |
| TCGA-13-1509 | CYP2B6     | ENST00000324071 | p.R378*  | c.1132C>T | Verified   | TTC | CGA | GGG | 1 | C | T |
| TCGA-04-1649 | CYP2D6     | ENST00000359033 | p.S166L  | c.497C>T  | Unverified | GAG | TCG | GGC | 2 | C | T |
| TCGA-04-1649 | CYP2D6_EN! | ENST00000360608 | p.S217L  | c.650C>T  | Unverified | GAG | TCG | GGC | 2 | C | T |

|              |            |                 |         |           |            |     |     |     |   |   |   |
|--------------|------------|-----------------|---------|-----------|------------|-----|-----|-----|---|---|---|
| TCGA-13-0807 | CYP2R1     | ENST00000334636 | p.R138* | c.412C>T  | Verified   | AGA | CGA | TTA | 1 | C | T |
| TCGA-61-1737 | CYP4A22    | ENST00000371891 | p.L48F  | c.142C>T  | Unverified | GCC | CTC | CAG | 1 | C | T |
| TCGA-61-1998 | CYP4A22    | ENST00000371891 | p.P157S | c.469C>T  | Verified   | AAG | CCA | TAC | 1 | C | T |
| TCGA-23-1122 | CYP4F2     | ENST00000221700 | p.R274W | c.820C>T  | Verified   | GAG | CGG | CGC | 1 | C | T |
| TCGA-13-1497 | CYP4F3     | ENST00000221307 | p.H264H | c.792C>T  | Verified   | GTG | CAC | GAC | 3 | C | T |
| TCGA-29-1781 | CYP7A1     | ENST00000301645 | p.Y401Y | c.1203C>T | Unverified | ATC | TAC | CCA | 3 | C | T |
| TCGA-09-2044 | CYP7B1     | ENST00000310193 | p.T426I | c.1277C>T | Verified   | AAA | ACC | ACC | 2 | C | T |
| TCGA-23-1021 | CYTH4      | ENST00000248901 | p.L140L | c.420C>T  | Verified   | AAC | CTC | GTC | 3 | C | T |
| TCGA-13-0923 | DAB1       | ENST00000371233 | p.G304G | c.912C>T  | Unverified | ATG | GGC | GCT | 3 | C | T |
| TCGA-13-1501 | DAGLB      | ENST00000297056 | p.P88L  | c.263C>T  | Verified   | AAC | CCT | GGA | 2 | C | T |
| TCGA-13-1501 | DAGLB      | ENST00000297056 | p.P88L  | c.263C>T  | Verified   | AAC | CCT | GGA | 2 | C | T |
| TCGA-13-0905 | DAGLB      | ENST00000297056 | p.A458A | c.1374C>T | Verified   | AGA | GCC | GCC | 3 | C | T |
| TCGA-25-1326 | DAP3       | ENST00000368336 | p.S215S | c.645C>T  | Verified   | gaa | agc | act | 3 | C | T |
| TCGA-24-1843 | DARC_ENST  | ENST00000368121 | p.T172I | c.515C>T  | Unverified | CTC | ACT | GTG | 2 | C | T |
| TCGA-29-1776 | DBC1       | ENST00000373969 | p.R198C | c.592C>T  | Unverified | ACA | CGC | ACT | 1 | C | T |
| TCGA-24-1847 | DBH        | ENST00000393056 | p.L197F | c.589C>T  | Unverified | CAG | CTC | CTG | 1 | C | T |
| TCGA-61-2095 | DBH        | ENST00000393056 | p.R79W  | c.235C>T  | Unverified | GTG | CGG | AGG | 1 | C | T |
| TCGA-29-1691 | DBN1_ENST  | ENST00000292385 | p.R22R  | c.66C>T   | Unverified | GGA | CGC | GAG | 3 | C | T |
| TCGA-29-1691 | DCAF12L2   | ENST00000538699 | p.N107N | c.321C>T  | Unverified | ctg | aac | gcc | 3 | C | T |
| TCGA-29-1702 | DCAF4L2    | ENST00000319675 | p.L37L  | c.111C>T  | Unverified | TTC | CTC | AGA | 3 | C | T |
| TCGA-24-1845 | DCAF4L2    | ENST00000319675 | p.N361N | c.1083C>T | Unverified | GAG | AAC | GAC | 3 | C | T |
| TCGA-04-1649 | DCC        | ENST00000442544 | p.R130W | c.388C>T  | Unverified | AGT | CGG | ACA | 1 | C | T |
| TCGA-13-0792 | DCC        | ENST00000442544 | p.D620D | c.1860C>T | Verified   | TCT | GAC | GTG | 3 | C | T |
| TCGA-20-1686 | DCC        | ENST00000442544 | p.A812A | c.2436C>T | Unverified | AGT | GCC | ACC | 3 | C | T |
| TCGA-13-1498 | DCLK1      | ENST00000255448 | p.A560V | c.1679C>T | Verified   | ATT | GCA | GAG | 2 | C | T |
| TCGA-13-0760 | DCLK3      | ENST00000416516 | p.R592W | c.1774C>T | Verified   | agc | cgg | ttg | 1 | C | T |
| TCGA-20-1683 | DCLRE1C    | ENST00000378246 | p.P539P | c.1617C>T | Unverified | GTT | CCC | TCA | 3 | C | T |
| TCGA-20-1683 | DCLRE1C_EM | ENST00000378278 | p.P654P | c.1962C>T | Unverified | GTT | CCC | TCA | 3 | C | T |
| TCGA-13-1496 | DCST2      | ENST00000368424 | p.T134T | c.402C>T  | Verified   | CAG | ACC | GCC | 3 | C | T |
| TCGA-61-1913 | DDAH1      | ENST00000284031 | p.S276L | c.827C>T  | Unverified | TGC | TCA | GTT | 2 | C | T |
| TCGA-04-1338 | DDB1       | ENST00000301764 | p.P721L | c.2162C>T | Verified   | TCT | CCA | AGG | 2 | C | T |
| TCGA-13-0920 | DDR2       | ENST00000367922 | p.G39G  | c.117C>T  | Verified   | GGA | GGC | CAG | 3 | C | T |
| TCGA-61-2009 | DDX24      | ENST00000330836 | p.T667T | c.2001C>T | Verified   | cgt | acc | tcg | 3 | C | T |
| TCGA-13-0884 | DDX42      | ENST00000578681 | p.R858W | c.2572C>T | Verified   | cat | cgg | cac | 1 | C | T |

|              |            |                 |          |           |            |     |     |     |   |   |   |
|--------------|------------|-----------------|----------|-----------|------------|-----|-----|-----|---|---|---|
| TCGA-24-1417 | DDX50      | ENST00000373585 | p.S527S  | c.1581C>T | Verified   | AAA | AGC | ATG | 3 | C | T |
| TCGA-13-1488 | DEFB118    | ENST00000253381 | p.Q37*   | c.109C>T  | Verified   | AAA | CAA | TGC | 1 | C | T |
| TCGA-29-1690 | DEFB118    | ENST00000253381 | p.R64*   | c.190C>T  | Unverified | AGG | CGA | GTT | 1 | C | T |
| TCGA-13-1488 | DEFB125    | ENST00000382410 | p.S137F  | c.410C>T  | Verified   | CCA | TCT | GAG | 2 | C | T |
| TCGA-13-1488 | DENND3     | ENST00000262585 | p.H461Y  | c.1381C>T | Verified   | TCG | CAC | CTG | 1 | C | T |
| TCGA-25-2400 | DENND4A    | ENST00000431932 | p.T155M  | c.464C>T  | Verified   | AAT | ACG | TTG | 2 | C | T |
| TCGA-24-1845 | DENND5B    | ENST00000389082 | p.R1216C | c.3646C>T | Unverified | GAT | CGC | CTG | 1 | C | T |
| TCGA-23-1032 | DEPDC5     | ENST00000400248 | p.Q107*  | c.319C>T  | Verified   | GAT | CAG | TAT | 1 | C | T |
| TCGA-04-1361 | DEPDC5     | ENST00000400248 | p.S442F  | c.1325C>T | Verified   | ACA | TCT | CTC | 2 | C | T |
| TCGA-04-1361 | DEPDC5     | ENST00000400248 | p.S442F  | c.1325C>T | Verified   | ACA | TCT | CTC | 2 | C | T |
| TCGA-13-0885 | DERL3      | ENST00000318109 | p.D187D  | c.561C>T  | Verified   | GAG | GAC | GTC | 3 | C | T |
| TCGA-04-1361 | DFNA5      | ENST00000342947 | p.R108R  | c.324C>T  | Verified   | AGC | CGC | GTA | 3 | C | T |
| TCGA-04-1361 | DFNA5      | ENST00000342947 | p.R108R  | c.324C>T  | Verified   | AGC | CGC | GTA | 3 | C | T |
| TCGA-24-2035 | DFNB31     | ENST00000362057 | p.L816L  | c.2446C>T | Unverified | ACT | CTG | GTC | 1 | C | T |
| TCGA-29-1775 | DGKB       | ENST00000403951 | p.T696T  | c.2088C>T | Unverified | ACC | ACC | GTC | 3 | C | T |
| TCGA-10-0930 | DHCR7      | ENST00000407721 | p.T135I  | c.404C>T  | Verified   | GTG | ACT | CCT | 2 | C | T |
| TCGA-10-0930 | DHCR7      | ENST00000407721 | p.T135I  | c.404C>T  | Verified   | GTG | ACT | CCT | 2 | C | T |
| TCGA-13-0795 | DHRS4      | ENST00000313250 | p.A47V   | c.140C>T  | Verified   | TTC | GCC | ATC | 2 | C | T |
| TCGA-04-1362 | DIAPH3     | ENST00000400324 | p.P940S  | c.2818C>T | Verified   | TTT | CCC | CCT | 1 | C | T |
| TCGA-13-1512 | DIDO1      | ENST00000395343 | p.A333V  | c.998C>T  | Verified   | ACG | GCA | GAT | 2 | C | T |
| TCGA-13-1512 | DIDO1      | ENST00000395343 | p.S1812L | c.5435C>T | Unverified | TTC | TCG | GGG | 2 | C | T |
| TCGA-30-1856 | DIS3       | ENST00000377767 | p.D554D  | c.1662C>T | Unverified | TGT | GAC | GTG | 3 | C | T |
| TCGA-25-2401 | DISP2      | ENST00000267889 | p.R1337W | c.4009C>T | Verified   | AAG | CGG | GAC | 1 | C | T |
| TCGA-13-1510 | DKFZP434P1 | ENST00000305663 | p.F34F   | c.102C>T  | Unverified | GGC | TTC | CTT | 3 | C | T |
| TCGA-24-1844 | DKK2       | ENST00000285311 | p.R230C  | c.688C>T  | Unverified | cag | cgt | tgc | 1 | C | T |
| TCGA-20-1686 | DLGAP1     | ENST00000315677 | p.H216H  | c.648C>T  | Unverified | TAC | CAC | GCC | 3 | C | T |
| TCGA-09-0369 | DLGAP2_EN  | ENST00000356067 | p.N289N  | c.867C>T  | Verified   | CGC | AGC | TCC | 3 | C | T |
| TCGA-09-0369 | DLGAP2_EN  | ENST00000356067 | p.N289N  | c.867C>T  | Verified   | CGC | AGC | TCC | 3 | C | T |
| TCGA-13-1408 | DLGAP3     | ENST00000373347 | p.H238Y  | c.712C>T  | Verified   | CGG | CAC | GGC | 1 | C | T |
| TCGA-13-0883 | DLK1       | ENST00000341267 | p.G161G  | c.483C>T  | Verified   | CCT | GGC | TTC | 3 | C | T |
| TCGA-13-0913 | DLK1       | ENST00000341267 | p.D380D  | c.1140C>T | Verified   | GGC | GAC | GAG | 3 | C | T |
| TCGA-23-1122 | DMBT1_ENS  | ENST00000368915 | p.L1723L | c.5169C>T | Verified   | TGG | CTC | TCC | 3 | C | T |
| TCGA-24-2280 | DMP1       | ENST00000339673 | p.D112D  | c.336C>T  | Unverified | gat | gac | acc | 3 | C | T |
| TCGA-61-1900 | DNAH1      | ENST00000273600 | p.A438V  | c.1313C>T | Unverified | CTT | GCC | AGA | 2 | C | T |

|              |           |                 |          |            |            |     |     |     |   |   |   |
|--------------|-----------|-----------------|----------|------------|------------|-----|-----|-----|---|---|---|
| TCGA-61-1900 | DNAH1_ENS | ENST00000420323 | p.A438V  | c.1313C>T  | Unverified | CTT | GCC | AGA | 2 | C | T |
| TCGA-24-1469 | DNAH17    | ENST00000300671 | p.I2196I | c.6588C>T  | Verified   | TGG | ATC | ATC | 3 | C | T |
| TCGA-29-1690 | DNAH2     | ENST00000389173 | p.R330C  | c.988C>T   | Unverified | TCT | CGT | CAA | 1 | C | T |
| TCGA-29-1762 | DNAH2     | ENST00000389173 | p.A25V   | c.74C>T    | Unverified | CGG | GCC | ACT | 2 | C | T |
| TCGA-20-0990 | DNAH5     | ENST00000265104 | p.R3197W | c.9589C>T  | Verified   | GTG | CGG | ACC | 1 | C | T |
| TCGA-61-1914 | DNAH5     | ENST00000265104 | p.N119N  | c.357C>T   | Unverified | GGA | AAC | GAT | 3 | C | T |
| TCGA-25-1318 | DNAH9     | ENST00000262442 | p.P935L  | c.2804C>T  | Verified   | TAT | CCG | TCT | 2 | C | T |
| TCGA-25-1318 | DNAH9     | ENST00000262442 | p.P935L  | c.2804C>T  | Verified   | TAT | CCG | TCT | 2 | C | T |
| TCGA-61-1733 | DNAH9     | ENST00000262442 | p.A2449V | c.7346C>T  | Unverified | CAG | GCG | TGT | 2 | C | T |
| TCGA-61-1733 | DNAH9     | ENST00000262442 | p.A2449V | c.7346C>T  | Unverified | CAG | GCG | TGT | 2 | C | T |
| TCGA-24-1435 | DNAH9     | ENST00000262442 | p.N2504N | c.7512C>T  | Verified   | AAA | AAC | GTG | 3 | C | T |
| TCGA-13-1496 | DNAI2     | ENST00000311014 | p.H363Y  | c.1087C>T  | Verified   | GGC | CAT | CAT | 1 | C | T |
| TCGA-04-1347 | DNAI2     | ENST00000311014 | p.Y199Y  | c.597C>T   | Verified   | TCA | TAC | ATC | 3 | C | T |
| TCGA-13-0762 | DNAJC18   | ENST00000302060 | p.D17D   | c.51C>T    | Verified   | ATT | GAC | GCA | 3 | C | T |
| TCGA-13-0762 | DNAJC18   | ENST00000302060 | p.D17D   | c.51C>T    | Verified   | ATT | GAC | GCA | 3 | C | T |
| TCGA-09-2049 | DNAJC22   | ENST00000549441 | p.L178L  | c.534C>T   | Verified   | ccg | ctc | agt | 3 | C | T |
| TCGA-24-1847 | DNAJC22   | ENST00000549441 | p.P333P  | c.999C>T   | Unverified | caa | ccc | agg | 3 | C | T |
| TCGA-23-1809 | DNAJC5    | ENST00000360864 | p.T117M  | c.350C>T   | Unverified | ctc | acg | tgc | 2 | C | T |
| TCGA-30-1718 | DNAJC5    | ENST00000360864 | p.N25N   | c.75C>T    | Unverified | aag | aac | gca | 3 | C | T |
| TCGA-29-1703 | DNAJC6    | ENST00000395325 | p.R766C  | c.2296C>T  | Unverified | gaa | cgt | ggg | 1 | C | T |
| TCGA-29-1691 | DNALI1    | ENST00000296218 | p.A7V    | c.20C>T    | Unverified | AAG | GCC | CAC | 2 | C | T |
| TCGA-24-1846 | DNHD1     | ENST00000254579 | p.S4675F | c.14024C>T | Unverified | CCT | TCC | AGC | 2 | C | T |
| TCGA-13-1497 | DNMT3A    | ENST00000321117 | p.L737F  | c.2209C>T  | Verified   | cgc | ctc | ctg | 1 | C | T |
| TCGA-23-1022 | DOC2A     | ENST00000350119 | p.A65V   | c.194C>T   | Verified   | CCT | GCA | GCC | 2 | C | T |
| TCGA-23-1110 | DOCK1     | NM_001380.2     | p.R279*  | c.835C>T   | Verified   | ttg | cga | gcc | 1 | C | T |
| TCGA-24-1846 | DOCK10    | ENST00000258390 | p.S1984L | c.5951C>T  | Unverified | CTG | TCG | GGC | 2 | C | T |
| TCGA-24-1846 | DOCK10_EN | ENST00000373702 | p.S493L  | c.1478C>T  | Unverified | CTG | TCG | GGC | 2 | C | T |
| TCGA-20-0990 | DOCK3_ENS | ENST00000266037 | p.R202C  | c.604C>T   | Verified   | ATG | CGC | CCA | 1 | C | T |
| TCGA-04-1337 | DOCK6     | ENST00000319867 | p.P1926S | c.5776C>T  | Verified   | GAC | CCA | CCA | 1 | C | T |
| TCGA-61-1899 | DOCK6     | ENST00000319867 | p.P482L  | c.1445C>T  | Unverified | CGC | CCG | TCG | 2 | C | T |
| TCGA-24-1846 | DOCK6     | ENST00000319867 | p.H1882H | c.5646C>T  | Unverified | GAC | CAC | GCC | 3 | C | T |
| TCGA-20-0990 | DOCK8     | ENST00000432829 | p.R1965C | c.5893C>T  | Verified   | AAG | CGT | CTC | 1 | C | T |
| TCGA-24-1849 | DOK7_ENST | ENST00000389653 | p.P540P  | c.1620C>T  | Unverified | ATC | CCC | GTC | 3 | C | T |
| TCGA-29-1696 | DOPEY2    | ENST00000399151 | p.L367F  | c.1099C>T  | Unverified | GTC | CTC | ATC | 1 | C | T |



|              |            |                 |          |           |            |     |     |     |   |   |   |
|--------------|------------|-----------------|----------|-----------|------------|-----|-----|-----|---|---|---|
| TCGA-29-1696 | DOPEY2     | ENST00000399151 | p.L367F  | c.1099C>T | Unverified | GTC | CTC | ATC | 1 | C | T |
| TCGA-24-1846 | DPP4       | ENST00000360534 | p.V233V  | c.699C>T  | Unverified | GAA | GTC | CCA | 3 | C | T |
| TCGA-04-1652 | DPP6       | ENST00000404039 | p.T268T  | c.804C>T  | Unverified | TAC | ACC | GGC | 3 | C | T |
| TCGA-04-1652 | DPP6       | ENST00000404039 | p.T268T  | c.804C>T  | Unverified | TAC | ACC | GGC | 3 | C | T |
| TCGA-04-1652 | DPP6_ENST  | ENST00000332007 | p.T270T  | c.810C>T  | Unverified | TAC | ACC | GGC | 3 | C | T |
| TCGA-04-1652 | DPP6_ENST  | ENST00000332007 | p.T270T  | c.810C>T  | Unverified | TAC | ACC | GGC | 3 | C | T |
| TCGA-04-1652 | DPP6_ENST  | ENST00000377770 | p.T332T  | c.996C>T  | Unverified | TAC | ACC | GGC | 3 | C | T |
| TCGA-04-1652 | DPP6_ENST  | ENST00000377770 | p.T332T  | c.996C>T  | Unverified | TAC | ACC | GGC | 3 | C | T |
| TCGA-61-2113 | DPP7       | ENST00000371579 | p.A193V  | c.578C>T  | Unverified | GTG | GCA | GGC | 2 | C | T |
| TCGA-13-0760 | DQX1       | ENST00000393951 | p.P116L  | c.347C>T  | Verified   | TCC | CCC | ATC | 2 | C | T |
| TCGA-29-1699 | DRP2       | ENST00000402866 | p.T506M  | c.1517C>T | Unverified | GGC | ACG | GAA | 2 | C | T |
| TCGA-04-1356 | DRP2       | ENST00000402866 | p.G156G  | c.468C>T  | Verified   | CGG | GGC | CCC | 3 | C | T |
| TCGA-24-2267 | DSC1       | ENST00000257197 | p.S643F  | c.1928C>T | Verified   | TAT | TCT | GTG | 2 | C | T |
| TCGA-04-1655 | DSCAM      | ENST00000400454 | p.G381G  | c.1143C>T | Unverified | GGG | GGC | GCA | 3 | C | T |
| TCGA-24-2280 | DSCAML1    | ENST00000321322 | p.T2092I | c.6275C>T | Unverified | AGC | ACA | TCG | 2 | C | T |
| TCGA-04-1331 | DSEL       | ENST00000310045 | p.T46I   | c.137C>T  | Verified   | TTC | ACA | GAT | 2 | C | T |
| TCGA-23-1031 | DSG3       | ENST00000257189 | p.S512S  | c.1536C>T | Verified   | GTC | TCC | GCT | 3 | C | T |
| TCGA-25-2391 | DSP        | ENST00000379802 | p.V860V  | c.2580C>T | Unverified | AAA | GTC | ACA | 3 | C | T |
| TCGA-29-1703 | DST        | ENST00000370765 | p.L2508L | c.7522C>T | Unverified | GGC | CTG | GTT | 1 | C | T |
| TCGA-29-1703 | DST_ENSTO  | ENST00000370765 | p.L2508L | c.7522C>T | Unverified | GGC | CTG | GTT | 1 | C | T |
| TCGA-04-1652 | DTX3L      | ENST00000296161 | p.L553L  | c.1657C>T | Unverified | GAA | CTG | GAC | 1 | C | T |
| TCGA-04-1652 | DTX3L      | ENST00000296161 | p.L553L  | c.1657C>T | Unverified | GAA | CTG | GAC | 1 | C | T |
| TCGA-29-1775 | DTX3L      | ENST00000296161 | p.P10L   | c.29C>T   | Unverified | TCC | CCG | CTC | 2 | C | T |
| TCGA-23-1110 | DUOX1      | ENST00000389037 | p.I962I  | c.2886C>T | Verified   | ATG | ATC | TGT | 3 | C | T |
| TCGA-04-1651 | DUPD1      | ENST00000338487 | p.D167D  | c.501C>T  | Unverified | AAG | GAC | ATG | 3 | C | T |
| TCGA-04-1651 | DUPD1      | ENST00000338487 | p.D167D  | c.501C>T  | Unverified | AAG | GAC | ATG | 3 | C | T |
| TCGA-24-1423 | DUPD1      | ENST00000338487 | p.D133D  | c.399C>T  | Verified   | ATC | GAC | AGA | 3 | C | T |
| TCGA-61-1907 | DUSP27     | ENST00000361200 | p.G228G  | c.684C>T  | Unverified | ATG | GGC | ATC | 3 | C | T |
| TCGA-24-1469 | DYNC2H1_E  | ENST00000398093 | p.F222F  | c.666C>T  | Verified   | AAC | TTC | ATG | 3 | C | T |
| TCGA-24-1850 | DYRK2      | ENST00000344096 | p.R386C  | c.1156C>T | Unverified | TCG | CGT | TTT | 1 | C | T |
| TCGA-24-1849 | DYSF       | ENST00000258104 | p.R253W  | c.757C>T  | Unverified | ACG | CGG | ATC | 1 | C | T |
| TCGA-24-1849 | DYSF_ENSTC | ENST00000410020 | p.R285W  | c.853C>T  | Unverified | ACG | CGG | ATC | 1 | C | T |
| TCGA-13-0913 | DYTN       | ENST00000452335 | p.A558V  | c.1673C>T | Verified   | GGA | GCT | CAG | 2 | C | T |
| TCGA-13-0793 | EBP        | ENST00000495186 | p.A54V   | c.161C>T  | Verified   | gct | gcg | gtt | 2 | C | T |

|              |                           |                 |           |            |            |     |     |     |   |   |   |
|--------------|---------------------------|-----------------|-----------|------------|------------|-----|-----|-----|---|---|---|
| TCGA-25-2398 | ECE2                      | ENST00000359140 | p.T266M   | c.797C>T   | Unverified | TCC | ACG | AGG | 2 | C | T |
| TCGA-25-2398 | ECE2_ENSTC                | ENST00000402825 | p.T413M   | c.1238C>T  | Unverified | TCC | ACG | AGG | 2 | C | T |
| TCGA-09-2051 | EDC4                      | ENST00000358933 | p.R860*   | c.2578C>T  | Unverified | CAC | CGA | CCA | 1 | C | T |
| TCGA-25-2401 | EFHB_ENSTC                | ENST00000295824 | p.A778V   | c.2333C>T  | Verified   | ATT | GCA | GAG | 2 | C | T |
| TCGA-25-2400 | EFNB1                     | ENST00000204961 | p.R266C   | c.796C>T   | Unverified | cta | cgc | aag | 1 | C | T |
| TCGA-13-0923 | EFNB2                     | ENST00000245323 | p.P261L   | c.782C>T   | Verified   | TCG | CCG | CAG | 2 | C | T |
| TCGA-29-1775 | EFTUD2                    | ENST00000426333 | p.R220C   | c.658C>T   | Unverified | TTG | CGC | ATC | 1 | C | T |
| TCGA-24-1844 | EGFL4                     | ENST00000251268 | p.P1589S  | c.4765C>T  | Unverified | ATG | CCG | GTG | 1 | C | T |
| TCGA-13-0887 | EGFLAM                    | ENST00000322350 | p.C810C   | c.2430C>T  | Verified   | GAC | TGC | CCC | 3 | C | T |
| TCGA-23-2078 | EGLN2                     | ENST00000303961 | p.R187W   | c.559C>T   | Verified   | atg | cgg | tac | 1 | C | T |
| TCGA-61-2012 | EHD4                      | ENST00000220325 | p.A505V   | c.1514C>T  | Verified   | TTC | GCG | CTG | 2 | C | T |
| TCGA-10-0930 | EHD4                      | ENST00000220325 | p.N133N   | c.399C>T   | Verified   | GGA | AAC | GCT | 3 | C | T |
| TCGA-10-0930 | EHD4                      | ENST00000220325 | p.N133N   | c.399C>T   | Verified   | GGA | AAC | GCT | 3 | C | T |
| TCGA-24-1431 | EHMT1                     | ENST00000298728 | p.T616T   | c.1848C>T  | Unverified | GAC | ACC | ACC | 3 | C | T |
| TCGA-13-0887 | EHMT2                     | ENST00000375537 | p.S119F   | c.356C>T   | Verified   | TCT | TCC | CCC | 2 | C | T |
| TCGA-29-1699 | EIF2B1                    | ENST00000424014 | p.D274D   | c.822C>T   | Unverified | GTC | GAC | TAC | 3 | C | T |
| TCGA-09-2051 | EIF3B                     | ENST00000397011 | p.G536G   | c.1608C>T  | Unverified | AAA | GGC | ACC | 3 | C | T |
| TCGA-13-0755 | EIF4EBP3                  | ENST00000310331 | p.A54V    | c.161C>T   | Verified   | ATT | GCC | CGG | 2 | C | T |
| TCGA-23-2077 | ELF3                      | ENST00000359651 | p.P30S    | c.88C>T    | Unverified | GTT | CCC | CCT | 1 | C | T |
| TCGA-13-1505 | ELF4                      | ENST00000335997 | p.P360S   | c.1078C>T  | Verified   | CAG | CCA | TCT | 1 | C | T |
| TCGA-25-1326 | ELK3                      | ENST00000228741 | p.C112C   | c.336C>T   | Unverified | gac | tgc | aag | 3 | C | T |
| TCGA-04-1336 | ELL3                      | ENST00000319359 | p.R320C   | c.958C>T   | Verified   | GCC | CGT | GTT | 1 | C | T |
| TCGA-13-0795 | ELMO1                     | ENST00000310758 | p.I280I   | c.840C>T   | Verified   | GTC | ATC | CGA | 3 | C | T |
| TCGA-29-1770 | ELMO3                     | ENST00000393997 | p.A64A    | c.192C>T   | Unverified | ATT | GCC | ATC | 3 | C | T |
| TCGA-30-1714 | ELOVL2                    | ENST00000354666 | p.T218M   | c.653C>T   | Unverified | ATC | ACG | CAC | 2 | C | T |
| TCGA-13-0904 | EMID2                     | ENST00000397927 | p.F27F    | c.81C>T    | Unverified | CCC | TTC | TCG | 3 | C | T |
| TCGA-23-1116 | EMX2                      | ENST00000369201 | p.A59V    | c.176C>T   | Unverified | GCC | GCC | GGT | 2 | C | T |
| TCGA-24-1469 | ENO1                      | ENST00000234590 | p.F178F   | c.534C>T   | Verified   | aac | ttc | agg | 3 | C | T |
| TCGA-23-1022 | ENPP1                     | ENST00000360971 | p.R59C    | c.175C>T   | Verified   | GGT | CGC | TGT | 1 | C | T |
| TCGA-25-2400 | ENPP7                     | ENST00000328313 | p.Y388Y   | c.1164C>T  | Unverified | GTG | TAC | GAG | 3 | C | T |
| TCGA-13-0792 | ENSG00000:ENST00000314191 | p.A2031V        | c.6092C>T | Unverified | TTG        | GCA | GAC | 2   | C | T |   |
| TCGA-04-1652 | ENSG00000:ENST00000324457 | p.R67C          | c.199C>T  | Unverified | TCC        | CGC | GTG | 1   | C | T |   |
| TCGA-04-1652 | ENSG00000:ENST00000324457 | p.R67C          | c.199C>T  | Unverified | TCC        | CGC | GTG | 1   | C | T |   |
| TCGA-29-1785 | ENSG00000:ENST00000456556 | p.A1627V        | c.4880C>T | Unverified | CAA        | GCT | GAG | 2   | C | T |   |

|              |                            |          |           |            |     |     |     |   |   |   |
|--------------|----------------------------|----------|-----------|------------|-----|-----|-----|---|---|---|
| TCGA-29-1785 | ENSG00000: ENST00000456556 | p.A1627V | c.4880C>T | Unverified | CAA | GCT | GAG | 2 | C | T |
| TCGA-29-1693 | ENSG00000: ENST00000330252 | p.T101M  | c.302C>T  | Unverified | ACC | ACG | TGG | 2 | C | T |
| TCGA-13-0887 | ENSG00000: ENST00000334646 | p.P165L  | c.494C>T  | Verified   | CTG | CCC | TTC | 2 | C | T |
| TCGA-24-1470 | ENSG00000: ENST00000341569 | p.T135M  | c.404C>T  | Verified   | GTT | ACG | TTG | 2 | C | T |
| TCGA-20-1685 | ENSG00000: ENST00000400226 | p.A246V  | c.737C>T  | Unverified | CAG | GCG | CTG | 2 | C | T |
| TCGA-29-1711 | ENSG00000: ENST00000402510 | p.T1498T | c.4494C>T | Unverified | TTC | ACC | CAG | 3 | C | T |
| TCGA-29-1711 | ENSG00000: ENST00000402510 | p.T1498T | c.4494C>T | Unverified | TTC | ACC | CAG | 3 | C | T |
| TCGA-20-1687 | ENSG00000: ENST00000395906 | p.S235F  | c.704C>T  | Unverified | ATA | TCC | GAA | 2 | C | T |
| TCGA-13-0920 | ENTHD1 ENST00000325157     | p.N27N   | c.81C>T   | Verified   | TCT | AAC | GAC | 3 | C | T |
| TCGA-09-2050 | EP400 ENST00000389561      | p.A1150A | c.3450C>T | Verified   | TGG | GCC | GAA | 3 | C | T |
| TCGA-24-1464 | EPB41L1 ENST00000338074    | p.H37H   | c.111C>T  | Verified   | GGC | CAC | GGC | 3 | C | T |
| TCGA-61-2009 | EPB41L1 ENST00000338074    | p.G581G  | c.1743C>T | Verified   | ACA | GGC | GAT | 3 | C | T |
| TCGA-25-1313 | EPB41L3 ENST00000341928    | p.T752M  | c.2255C>T | Verified   | GTA | ACG | AAT | 2 | C | T |
| TCGA-61-1740 | EPDR1 ENST00000559325      | p.S65F   | c.194C>T  | Unverified | GCG | TCC | GGA | 2 | C | T |
| TCGA-29-1785 | EPG5 ENST00000282041       | p.P247L  | c.740C>T  | Unverified | CTC | CCG | TCT | 2 | C | T |
| TCGA-29-1785 | EPG5 ENST00000282041       | p.P247L  | c.740C>T  | Unverified | CTC | CCG | TCT | 2 | C | T |
| TCGA-13-1497 | EPHA1 ENST00000275815      | p.R966C  | c.2896C>T | Verified   | AAG | CGC | ATT | 1 | C | T |
| TCGA-30-1718 | EPHA10 CGP_EPHA10.1        | p.T516T  | c.1548C>T | Unverified | gtc | acc | gtc | 3 | C | T |
| TCGA-29-1699 | EPHA3 ENST00000336596      | p.V543V  | c.1629C>T | Unverified | gtg | gtc | atg | 3 | C | T |
| TCGA-13-0920 | EPHA5 ENST00000273854      | p.C610C  | c.1830C>T | Verified   | CTG | TGC | GCT | 3 | C | T |
| TCGA-61-2095 | EPHA6 SU_EPHA6             | p.P730S  | c.2188C>T | Unverified | cat | cca | gtg | 1 | C | T |
| TCGA-04-1655 | EPHB1 ENST00000398015      | p.T387M  | c.1160C>T | Unverified | CTG | ACG | GAG | 2 | C | T |
| TCGA-04-1655 | EPHB1_ENS ENST00000398015  | p.T387M  | c.1160C>T | Unverified | CTG | ACG | GAG | 2 | C | T |
| TCGA-29-1766 | EPHB2 NM_017449            | p.R79W   | c.235C>T  | Unverified | atc | cgg | cgc | 1 | C | T |
| TCGA-29-1766 | EPHB2_ENS ENST00000374632  | p.R79W   | c.235C>T  | Unverified | ATC | CGG | CGC | 1 | C | T |
| TCGA-61-2008 | EPOR ENST00000222139       | p.T466I  | c.1397C>T | Verified   | TCA | ACT | GAC | 2 | C | T |
| TCGA-61-1904 | EPSTI1 ENST00000313640     | p.D26D   | c.78C>T   | Unverified | CAG | GAC | CCT | 3 | C | T |
| TCGA-61-1910 | EPSTI1 ENST00000313640     | p.L301L  | c.903C>T  | Unverified | GGC | CTC | GAG | 3 | C | T |
| TCGA-24-1463 | EPX ENST00000225371        | p.R645*  | c.1933C>T | Verified   | GCC | CGA | GAC | 1 | C | T |
| TCGA-13-0884 | ERC1 ENST00000397203       | p.Q827*  | c.2479C>T | Verified   | cag | cag | cta | 1 | C | T |
| TCGA-09-2044 | ERCC4 ENST00000311895      | p.S780S  | c.2340C>T | Verified   | atc | tcc | agc | 3 | C | T |
| TCGA-13-0905 | ERCC4 ENST00000311895      | p.D457D  | c.1371C>T | Verified   | gaa | gac | agt | 3 | C | T |
| TCGA-30-1891 | ERCC5 ENST00000355739      | p.S1078F | c.3233C>T | Unverified | GAT | TCT | AAA | 2 | C | T |
| TCGA-13-0885 | ERCC5 ENST00000355739      | p.A1165A | c.3495C>T | Verified   | ACC | GCC | AGA | 3 | C | T |

|              |            |                 |          |           |            |     |     |     |   |   |   |
|--------------|------------|-----------------|----------|-----------|------------|-----|-----|-----|---|---|---|
| TCGA-24-1104 | ERCC6      | ENST00000355832 | p.Q524*  | c.1570C>T | Verified   | TGC | CAG | CAG | 1 | C | T |
| TCGA-04-1336 | ERG        | ENST00000442448 | p.S305L  | c.914C>T  | Verified   | CTG | TCG | GAC | 2 | C | T |
| TCGA-23-2078 | ERMN       | ENST00000397283 | p.T148I  | c.443C>T  | Verified   | ATT | ACT | GAG | 2 | C | T |
| TCGA-04-1542 | ESRRG      | ENST00000408911 | p.S81L   | c.242C>T  | Verified   | gac | tcg | cca | 2 | C | T |
| TCGA-61-1906 | ESRRG      | ENST00000408911 | p.P112L  | c.335C>T  | Unverified | gat | ccc | cag | 2 | C | T |
| TCGA-61-1906 | ESRRG      | ENST00000408911 | p.P112L  | c.335C>T  | Unverified | gat | ccc | cag | 2 | C | T |
| TCGA-13-0916 | ESX1       | ENST00000372588 | p.A364V  | c.1091C>T | Verified   | atg | gcg | cct | 2 | C | T |
| TCGA-61-1910 | ETV3L      | ENST00000454449 | p.Y202Y  | c.606C>T  | Unverified | GTC | TAC | CGA | 3 | C | T |
| TCGA-61-1910 | ETV3L_ENST | ENST00000454449 | p.Y202Y  | c.606C>T  | Unverified | GTC | TAC | CGA | 3 | C | T |
| TCGA-13-1408 | EVC2       | ENST00000344408 | p.A785V  | c.2354C>T | Unverified | ATG | GCT | GCA | 2 | C | T |
| TCGA-13-1496 | EVC2       | ENST00000344408 | p.A814V  | c.2441C>T | Verified   | GAC | GCT | CCT | 2 | C | T |
| TCGA-13-0919 | EVI2B      | NM_006495.2     | p.T87I   | c.260C>T  | Verified   | tat | acc | tct | 2 | C | T |
| TCGA-25-1326 | EVI2B      | NM_006495.2     | p.S150L  | c.449C>T  | Verified   | caa | tca | tca | 2 | C | T |
| TCGA-61-1915 | EXOC8      | ENST00000360394 | p.F541F  | c.1623C>T | Unverified | ACC | TTC | ATC | 3 | C | T |
| TCGA-61-2012 | EXTL1      | ENST00000374280 | p.L30F   | c.88C>T   | Unverified | CTT | CTC | CGC | 1 | C | T |
| TCGA-13-1512 | F11R       | ENST00000289779 | p.L14F   | c.40C>T   | Verified   | TGC | CTC | TTC | 1 | C | T |
| TCGA-24-1104 | F2         | ENST00000311907 | p.R198C  | c.592C>T  | Verified   | CCA | CGC | TCC | 1 | C | T |
| TCGA-04-1367 | F8         | ENST00000360256 | p.R1715* | c.5143C>T | Verified   | ACA | CGA | CAC | 1 | C | T |
| TCGA-04-1367 | F8_ENST000 | ENST00000360256 | p.R1715* | c.5143C>T | Verified   | ACA | CGA | CAC | 1 | C | T |
| TCGA-04-1331 | FAAH2      | ENST00000374900 | p.R148C  | c.442C>T  | Verified   | AAC | CGT | CGT | 1 | C | T |
| TCGA-20-0990 | FAHD2A     | ENST00000233379 | p.A163A  | c.489C>T  | Verified   | CTG | GCC | GTG | 3 | C | T |
| TCGA-23-1021 | FAIM2      | ENST00000320634 | p.C223C  | c.669C>T  | Verified   | tcc | tgc | cag | 3 | C | T |
| TCGA-23-1116 | FAM102A    | ENST00000373095 | p.T317T  | c.951C>T  | Unverified | CCG | ACC | TGG | 3 | C | T |
| TCGA-23-1021 | FAM113A    | ENST00000360652 | p.P201P  | c.603C>T  | Verified   | CAG | CCC | CTG | 3 | C | T |
| TCGA-29-1703 | FAM120C    | ENST00000375180 | p.L754F  | c.2260C>T | Unverified | ATG | CTC | AAT | 1 | C | T |
| TCGA-09-0369 | FAM123B_E  | ENST00000330258 | p.G877G  | c.2631C>T | Verified   | CCT | GGC | CTG | 3 | C | T |
| TCGA-09-0369 | FAM123B_E  | ENST00000330258 | p.G877G  | c.2631C>T | Verified   | CCT | GGC | CTG | 3 | C | T |
| TCGA-29-1693 | FAM134B    | ENST00000306320 | p.V122V  | c.366C>T  | Unverified | TCC | GTC | ATG | 3 | C | T |
| TCGA-13-0760 | FAM135B    | ENST00000395297 | p.I398I  | c.1194C>T | Verified   | GAC | ATC | GAC | 3 | C | T |
| TCGA-61-2095 | FAM161A_E  | ENST00000405894 | p.L15L   | c.45C>T   | Unverified | AGT | CTC | CAG | 3 | C | T |
| TCGA-25-1326 | FAM164A    | ENST00000263849 | p.L219F  | c.655C>T  | Verified   | AAA | CTT | CAG | 1 | C | T |
| TCGA-13-1496 | FAM184A    | ENST00000338891 | p.T723M  | c.2168C>T | Verified   | TTT | ACG | CAA | 2 | C | T |
| TCGA-23-1022 | FAM187B    | ENST00000324675 | p.L92F   | c.274C>T  | Verified   | GGC | CTC | TAC | 1 | C | T |
| TCGA-29-1699 | FAM187B    | ENST00000324675 | p.F296F  | c.888C>T  | Unverified | CAG | TTC | AAA | 3 | C | T |

|              |            |                     |          |            |            |     |     |     |   |   |   |
|--------------|------------|---------------------|----------|------------|------------|-----|-----|-----|---|---|---|
| TCGA-24-1469 | FAM193A    | ENST00000382839     | p.S858S  | c.2574C>T  | Verified   | AGC | TCC | GAA | 3 | C | T |
| TCGA-20-1686 | FAM21C     | ENST00000374362     | p.S637F  | c.1910C>T  | Unverified | GCA | TCT | GAC | 2 | C | T |
| TCGA-61-1725 | FAM47A     | ENST00000346193     | p.R500W  | c.1498C>T  | Unverified | cgt | cgg | acg | 1 | C | T |
| TCGA-61-2095 | FAM50A     | ENST00000393600     | p.I252I  | c.756C>T   | Unverified | tac | atc | aag | 3 | C | T |
| TCGA-09-1674 | FAM5B      | ENST00000361539     | p.R524C  | c.1570C>T  | Unverified | AGC | CGC | ATT | 1 | C | T |
| TCGA-04-1367 | FAM63A     | ENST00000361936     | p.P374L  | c.1121C>T  | Verified   | GGG | CCT | GGA | 2 | C | T |
| TCGA-23-1029 | FAM65A     | ENST0000042381      | p.S688S  | c.2064C>T  | Unverified | CTC | TCC | AGC | 3 | C | T |
| TCGA-13-1507 | FAM65C     | ENST00000327979     | p.P750S  | c.2248C>T  | Verified   | CTC | CCC | GGA | 1 | C | T |
| TCGA-24-2290 | FAM71D     | ENST00000311864     | p.S172S  | c.516C>T   | Verified   | ATC | TCC | CTC | 3 | C | T |
| TCGA-24-2290 | FAM71D     | ENST00000311864     | p.S172S  | c.516C>T   | Verified   | ATC | TCC | CTC | 3 | C | T |
| TCGA-30-1855 | FAM75D1    | ENST00000344803     | p.L143L  | c.427C>T   | Unverified | CAA | CTG | CTG | 1 | C | T |
| TCGA-30-1855 | FAM75D4    | ENST00000344803     | p.L143L  | c.427C>T   | Unverified | CAA | CTG | CTG | 1 | C | T |
| TCGA-04-1367 | FAM83A     | ENST00000518448     | p.A109V  | c.326C>T   | Verified   | gtg | gcc | tca | 2 | C | T |
| TCGA-04-1331 | FAM83D     | ENST00000217429     | p.S503S  | c.1509C>T  | Unverified | TCT | TCC | AGT | 3 | C | T |
| TCGA-61-1904 | FAM83E     | ENST00000263266     | p.P57S   | c.169C>T   | Unverified | TGG | CCC | TTC | 1 | C | T |
| TCGA-61-1907 | FAM90A20   | ENST00000360191     | p.V441V  | c.1323C>T  | Unverified | CGT | GTC | CCA | 3 | C | T |
| TCGA-13-1499 | FANCE      | ENST00000229769     | p.H236Y  | c.706C>T   | Verified   | GAA | CAT | AAG | 1 | C | T |
| TCGA-13-0904 | FANCG      | ENST00000378643     | p.Y367Y  | c.1101C>T  | Verified   | cat | tac | ttg | 3 | C | T |
| TCGA-24-2267 | FANCL      | ENST00000233741     | p.T367I  | c.1100C>T  | Verified   | ATT | ACC | TTA | 2 | C | T |
| TCGA-24-1469 | FAP        | ENST00000188790     | p.P245L  | c.734C>T   | Verified   | TAT | CCT | AGA | 2 | C | T |
| TCGA-25-1326 | FARP2      | ENST00000264042     | p.L578L  | c.1732C>T  | Verified   | ACG | CTG | CTC | 1 | C | T |
| TCGA-04-1347 | FAT1       | ENST00000441802     | p.A250V  | c.749C>T   | Verified   | CAG | GCC | AAT | 2 | C | T |
| TCGA-24-1470 | FAT1       | ENST00000441802     | p.S172S  | c.516C>T   | Verified   | GTC | AGC | GCC | 3 | C | T |
| TCGA-61-1725 | FAT2       | ENST00000261800     | p.Q2016* | c.6046C>T  | Unverified | GTC | CAG | TCA | 1 | C | T |
| TCGA-13-1488 | FAT3_ENSTC | ENST00000298047_v61 | p.A100V  | c.299C>T   | Unverified | ATT | GCA | GAT | 2 | C | T |
| TCGA-29-1699 | FAT3_ENSTC | ENST00000298047_v61 | p.C2360C | c.7080C>T  | Unverified | CAC | TGC | ACT | 3 | C | T |
| TCGA-13-1488 | FAT3_ENSTC | ENST00000409404     | p.A100V  | c.299C>T   | Unverified | ATT | GCA | GAT | 2 | C | T |
| TCGA-29-1699 | FAT3_ENSTC | ENST00000409404     | p.C2360C | c.7080C>T  | Unverified | CAC | TGC | ACT | 3 | C | T |
| TCGA-13-1498 | FAT4       | ENST00000330166     | p.P4292L | c.12875C>T | Verified   | ATT | CCA | CCC | 2 | C | T |
| TCGA-61-2102 | FAT4       | ENST00000330166     | p.S1342S | c.4026C>T  | Verified   | GAT | TCC | GAT | 3 | C | T |
| TCGA-13-1498 | FAT4_ENSTC | ENST00000394329     | p.P4349L | c.13046C>T | Verified   | ATT | CCA | CCC | 2 | C | T |
| TCGA-61-2102 | FAT4_ENSTC | ENST00000394329     | p.S1342S | c.4026C>T  | Verified   | GAT | TCC | GAT | 3 | C | T |
| TCGA-13-1498 | FBN1       | ENST00000316623     | p.D2567D | c.7701C>T  | Verified   | GAA | GAC | GTG | 3 | C | T |
| TCGA-24-2280 | FBN1       | ENST00000316623     | p.S2613S | c.7839C>T  | Unverified | CTC | AGC | GCT | 3 | C | T |

|              |           |                 |          |            |            |     |     |     |   |   |   |
|--------------|-----------|-----------------|----------|------------|------------|-----|-----|-----|---|---|---|
| TCGA-09-2056 | FBN2      | ENST00000262464 | p.T1748I | c.5243C>T  | Verified   | ACC | ACT | TGT | 2 | C | T |
| TCGA-61-2009 | FBN2      | ENST00000262464 | p.I633I  | c.1899C>T  | Verified   | TGC | ATC | AAT | 3 | C | T |
| TCGA-13-1499 | FBN3      | ENST00000270509 | p.P221S  | c.661C>T   | Verified   | CTT | CCA | TGT | 1 | C | T |
| TCGA-13-0760 | FBN3      | ENST00000270509 | p.T404T  | c.1212C>T  | Verified   | GCT | ACC | CTG | 3 | C | T |
| TCGA-13-1499 | FBN3      | ENST00000270509 | p.C846C  | c.2538C>T  | Verified   | CCC | TGC | GAA | 3 | C | T |
| TCGA-29-1762 | FBXL13    | ENST00000436908 | p.R513*  | c.1537C>T  | Unverified | TTA | CGA | AAT | 1 | C | T |
| TCGA-24-1423 | FBXL19    | NM_019085.1     | p.R408C  | c.1222C>T  | Verified   | ctg | cgt | ctg | 1 | C | T |
| TCGA-29-1699 | FBXL4     | ENST00000369244 | p.S618S  | c.1854C>T  | Unverified | aag | agc | ttt | 3 | C | T |
| TCGA-13-1497 | FBXL7     | ENST00000504595 | p.R152W  | c.454C>T   | Verified   | ccg | cgg | ctc | 1 | C | T |
| TCGA-23-1123 | FBXL7     | ENST00000504595 | p.T160M  | c.479C>T   | Verified   | ctg | acg | ggc | 2 | C | T |
| TCGA-23-1123 | FBXL7     | ENST00000504595 | p.T160M  | c.479C>T   | Verified   | ctg | acg | ggc | 2 | C | T |
| TCGA-24-1847 | FBXO18    | ENST00000379999 | p.Q215*  | c.643C>T   | Unverified | agg | caa | gaa | 1 | C | T |
| TCGA-23-1110 | FBXO46    | ENST00000317683 | p.F503F  | c.1509C>T  | Unverified | cac | ttc | aag | 3 | C | T |
| TCGA-24-1469 | FBXO7     | ENST00000266087 | p.T217I  | c.650C>T   | Verified   | GGC | ACC | GAA | 2 | C | T |
| TCGA-04-1342 | FCAR      | ENST00000355524 | p.L238L  | c.714C>T   | Verified   | GTC | CTC | GTG | 3 | C | T |
| TCGA-24-0975 | FCGBP     | ENST00000221347 | p.D4257D | c.12771C>T | Unverified | TGG | GAC | GAA | 3 | C | T |
| TCGA-61-1904 | FCGBP     | ENST00000221347 | p.Y198Y  | c.594C>T   | Unverified | CCC | TAC | AAT | 3 | C | T |
| TCGA-13-1489 | FCRL1     | ENST00000368176 | p.A60A   | c.180C>T   | Verified   | CGG | GCC | TTG | 3 | C | T |
| TCGA-24-2280 | FCRL5     | ENST00000361835 | p.Y447Y  | c.1341C>T  | Verified   | TAC | TAC | TGC | 3 | C | T |
| TCGA-13-1501 | FER1L5    | ENST00000505256 | p.Y1394Y | c.4182C>T  | Verified   | CTC | TAC | AGA | 3 | C | T |
| TCGA-13-1501 | FER1L5    | ENST00000505256 | p.Y1394Y | c.4182C>T  | Verified   | CTC | TAC | AGA | 3 | C | T |
| TCGA-04-1530 | FER1L6    | ENST00000399018 | p.G810G  | c.2430C>T  | Verified   | GCT | GGC | ACC | 3 | C | T |
| TCGA-61-1740 | FERD3L    | ENST00000275461 | p.R82R   | c.246C>T   | Unverified | GAG | CGC | GGA | 3 | C | T |
| TCGA-24-1464 | FERMT3    | ENST00000279227 | p.R542C  | c.1624C>T  | Verified   | CTG | CGC | TTC | 1 | C | T |
| TCGA-13-0760 | FFAR3     | ENST00000327809 | p.N32N   | c.96C>T    | Unverified | CTC | AAC | CTG | 3 | C | T |
| TCGA-23-1123 | FGD4      | ENST00000427716 | p.H197Y  | c.589C>T   | Verified   | CAC | CAT | GAG | 1 | C | T |
| TCGA-23-1123 | FGD4      | ENST00000427716 | p.H197Y  | c.589C>T   | Verified   | CAC | CAT | GAG | 1 | C | T |
| TCGA-25-2393 | FGD4      | ENST00000427716 | p.R224*  | c.670C>T   | Verified   | AAC | CGA | CTT | 1 | C | T |
| TCGA-29-1705 | FGF8      | ENST00000320185 | p.T194M  | c.581C>T   | Unverified | AAG | ACG | CGG | 2 | C | T |
| TCGA-13-1510 | FGFRL1    | ENST00000398484 | p.A94A   | c.282C>T   | Unverified | GAT | GCC | GGC | 3 | C | T |
| TCGA-29-1775 | FGGY      | ENST00000315089 | p.I190I  | c.570C>T   | Unverified | GGG | ATC | AGC | 3 | C | T |
| TCGA-29-1775 | FGGY_ENST | ENST00000303721 | p.I302I  | c.906C>T   | Unverified | GGG | ATC | AGC | 3 | C | T |
| TCGA-24-1464 | FHL2      | ENST00000409177 | p.L75L   | c.223C>T   | Verified   | TCA | CTG | GTG | 1 | C | T |
| TCGA-13-1496 | FHOD3     | ENST00000257209 | p.A1324V | c.3971C>T  | Verified   | GAC | GCG | GCT | 2 | C | T |

|              |            |                 |          |            |            |     |     |     |   |   |   |
|--------------|------------|-----------------|----------|------------|------------|-----|-----|-----|---|---|---|
| TCGA-29-1690 | FLG        | ENST00000368799 | p.D2781D | c.8343C>T  | Unverified | CAA | GAC | GGT | 3 | C | T |
| TCGA-61-1904 | FLG        | ENST00000368799 | p.S3845S | c.11535C>T | Unverified | CAG | TCC | GGC | 3 | C | T |
| TCGA-20-0991 | FLI1       | ENST00000429175 | p.Y332Y  | c.996C>T   | Verified   | aat | tac | gac | 3 | C | T |
| TCGA-09-2049 | FLJ13236   | ENST00000395069 | p.L178L  | c.534C>T   | Verified   | CCG | CTC | AGT | 3 | C | T |
| TCGA-24-1847 | FLJ13236   | ENST00000395069 | p.P333P  | c.999C>T   | Unverified | CAA | CCC | AGG | 3 | C | T |
| TCGA-61-1740 | FLJ16165   | ENST00000331256 | p.S67L   | c.200C>T   | Unverified | CCG | TCG | GGG | 2 | C | T |
| TCGA-10-0930 | FLJ90650   | ENST00000357872 | p.V43V   | c.129C>T   | Verified   | CGC | GTC | CCA | 3 | C | T |
| TCGA-10-0930 | FLJ90650   | ENST00000357872 | p.V43V   | c.129C>T   | Verified   | CGC | GTC | CCA | 3 | C | T |
| TCGA-29-1696 | FLNB       | ENST00000295956 | p.F1443F | c.4329C>T  | Unverified | TCC | TTC | ACG | 3 | C | T |
| TCGA-29-1696 | FLNB       | ENST00000295956 | p.F1443F | c.4329C>T  | Unverified | TCC | TTC | ACG | 3 | C | T |
| TCGA-29-1696 | FLNB_ENSTC | ENST00000490882 | p.F1443F | c.4329C>T  | Unverified | TCC | TTC | ACG | 3 | C | T |
| TCGA-29-1696 | FLNB_ENSTC | ENST00000490882 | p.F1443F | c.4329C>T  | Unverified | TCC | TTC | ACG | 3 | C | T |
| TCGA-29-1783 | FLNC       | ENST00000325888 | p.R269*  | c.805C>T   | Unverified | GTT | CGA | TCC | 1 | C | T |
| TCGA-13-0920 | FLRT2      | ENST00000330753 | p.I609I  | c.1827C>T  | Verified   | CAG | ATC | GTC | 3 | C | T |
| TCGA-04-1331 | FLYWCH2    | ENST00000293981 | p.N128N  | c.384C>T   | Unverified | GAG | AAC | TTT | 3 | C | T |
| TCGA-23-1124 | FMNL2      | ENST00000288670 | p.S160S  | c.480C>T   | Verified   | GAG | AGC | TCG | 3 | C | T |
| TCGA-20-1686 | FNDC1      | ENST00000297267 | p.Y198Y  | c.594C>T   | Unverified | GGC | TAC | GGG | 3 | C | T |
| TCGA-24-1103 | FNDC8      | ENST00000158009 | p.P300P  | c.900C>T   | Verified   | GAA | CCC | CGG | 3 | C | T |
| TCGA-25-2400 | FOXA3      | ENST00000302177 | p.R212C  | c.634C>T   | Unverified | aaa | cgc | ttc | 1 | C | T |
| TCGA-29-1785 | FOXH1      | ENST00000377317 | p.S5S    | c.15C>T    | Unverified | tgc | agc | ggc | 3 | C | T |
| TCGA-29-1785 | FOXH1      | ENST00000377317 | p.S5S    | c.15C>T    | Unverified | tgc | agc | ggc | 3 | C | T |
| TCGA-20-1683 | FOXJ3      | ENST00000372573 | p.P387L  | c.1160C>T  | Unverified | cga | ccg | cat | 2 | C | T |
| TCGA-04-1652 | FREM1      | ENST00000422223 | p.R1654C | c.4960C>T  | Unverified | TCC | CGC | GTG | 1 | C | T |
| TCGA-04-1652 | FREM1      | ENST00000422223 | p.R1654C | c.4960C>T  | Unverified | TCC | CGC | GTG | 1 | C | T |
| TCGA-13-1505 | FREM2      | ENST00000280481 | p.S402F  | c.1205C>T  | Verified   | GAC | TCT | GAC | 2 | C | T |
| TCGA-13-0904 | FRG2B      | ENST00000425520 | p.R214W  | c.640C>T   | Unverified | CTC | CGG | GGG | 1 | C | T |
| TCGA-13-0904 | FRG2C      | ENST00000308062 | p.R215W  | c.643C>T   | Verified   | CTC | CGG | GGG | 1 | C | T |
| TCGA-13-0884 | FRMPD1     | ENST00000377765 | p.N915N  | c.2745C>T  | Verified   | ACA | AAC | CCA | 3 | C | T |
| TCGA-24-1422 | FRMPD4     | ENST00000380682 | p.A728V  | c.2183C>T  | Verified   | gcc | gcg | gag | 2 | C | T |
| TCGA-61-1907 | FRRS1      | ENST00000287474 | p.L459F  | c.1375C>T  | Unverified | GTT | CTT | CAG | 1 | C | T |
| TCGA-13-0906 | FRS3       | ENST00000259748 | p.R121C  | c.361C>T   | Verified   | ACC | CGC | AAT | 1 | C | T |
| TCGA-61-1740 | FRY        | ENST00000380250 | p.Y556Y  | c.1668C>T  | Unverified | TAT | TAC | TCT | 3 | C | T |
| TCGA-13-0913 | FSCN1      | ENST00000382361 | p.F394F  | c.1182C>T  | Verified   | GGC | TTC | ATC | 3 | C | T |
| TCGA-24-1474 | FUBP3      | ENST00000319725 | p.Y558Y  | c.1674C>T  | Unverified | TTC | TAC | GGA | 3 | C | T |

|              |           |                     |          |           |            |     |     |     |   |   |   |
|--------------|-----------|---------------------|----------|-----------|------------|-----|-----|-----|---|---|---|
| TCGA-25-2393 | FUT1      | ENST00000310160     | p.A343V  | c.1028C>T | Verified   | gag | gcg | gcc | 2 | C | T |
| TCGA-29-1703 | FUT10     | ENST00000327671     | p.T236I  | c.707C>T  | Unverified | ATG | ACT | TAC | 2 | C | T |
| TCGA-24-1616 | FYB       | ENST00000351578     | p.P584L  | c.1751C>T | Verified   | GCC | CCT | TCA | 2 | C | T |
| TCGA-29-1777 | FZD1      | ENST00000287934     | p.P313L  | c.938C>T  | Unverified | ggg | ccc | gag | 2 | C | T |
| TCGA-13-0792 | G6PD      | ENST00000291567     | p.P512S  | c.1534C>T | Verified   | AAC | CCC | CAC | 1 | C | T |
| TCGA-24-1469 | G6PD      | ENST00000291567     | p.S180F  | c.539C>T  | Verified   | AGC | TCT | GAC | 2 | C | T |
| TCGA-29-2427 | GABRA6    | ENST00000274545     | p.P401L  | c.1202C>T | Verified   | ACA | CCT | GTC | 2 | C | T |
| TCGA-61-2095 | GAL3ST3   | ENST00000312006     | p.H72Y   | c.214C>T  | Unverified | ACT | CAC | AAG | 1 | C | T |
| TCGA-61-1738 | GALK2     | ENST00000327171     | p.R330*  | c.988C>T  | Unverified | GCG | CGA | GTG | 1 | C | T |
| TCGA-61-1738 | GALK2     | ENST00000327171     | p.R330*  | c.988C>T  | Unverified | GCG | CGA | GTG | 1 | C | T |
| TCGA-61-1738 | GALK2_ENS | ENST00000560031     | p.R341*  | c.1021C>T | Unverified | GCG | CGA | GTG | 1 | C | T |
| TCGA-61-1738 | GALK2_ENS | ENST00000560031     | p.R341*  | c.1021C>T | Unverified | GCG | CGA | GTG | 1 | C | T |
| TCGA-30-1856 | GALNT14   | ENST00000349752     | p.I228I  | c.684C>T  | Unverified | GTG | ATC | GAT | 3 | C | T |
| TCGA-25-1326 | GALNT2    | ENST00000366672     | p.D80D   | c.240C>T  | Verified   | CCA | GAC | TTT | 3 | C | T |
| TCGA-20-0991 | GALNTL1   | ENST00000337827     | p.F412F  | c.1236C>T | Verified   | TCC | TTC | CGC | 3 | C | T |
| TCGA-13-0755 | GANAB     | ENST00000356638     | p.C47C   | c.141C>T  | Verified   | TTC | TGC | AAG | 3 | C | T |
| TCGA-25-1326 | GATA3     | ENST00000379328     | p.S199F  | c.596C>T  | Verified   | tcg | tcc | cac | 2 | C | T |
| TCGA-29-1696 | GATC      | ENST00000551765     | p.A35V   | c.104C>T  | Unverified | GCT | GCG | GTG | 2 | C | T |
| TCGA-29-1696 | GATC      | ENST00000551765     | p.A35V   | c.104C>T  | Unverified | GCT | GCG | GTG | 2 | C | T |
| TCGA-13-1505 | GBE1      | ENST00000429644     | p.D571D  | c.1713C>T | Verified   | ACT | GAC | GAC | 3 | C | T |
| TCGA-24-1563 | GBE1      | ENST00000429644     | p.N58N   | c.174C>T  | Verified   | AAG | AAC | ATT | 3 | C | T |
| TCGA-09-0369 | GCHFR     | ENST00000260447     | p.P53L   | c.158C>T  | Verified   | CCT | CCC | CGC | 2 | C | T |
| TCGA-09-0369 | GCHFR     | ENST00000260447     | p.P53L   | c.158C>T  | Verified   | CCT | CCC | CGC | 2 | C | T |
| TCGA-24-1850 | GCK       | ENST00000345378     | p.R44C   | c.130C>T  | Unverified | gac | cgc | ggc | 1 | C | T |
| TCGA-24-1850 | GCK_ENST0 | ENST00000403799     | p.R43C   | c.127C>T  | Unverified | GAC | CGC | GGC | 1 | C | T |
| TCGA-24-1464 | GCN1L1    | ENST00000300648     | p.P1020P | c.3060C>T | Verified   | TCC | CCC | AAC | 3 | C | T |
| TCGA-61-2009 | GDAP2     | ENST00000369443     | p.P429P  | c.1287C>T | Verified   | CAT | CCC | ACA | 3 | C | T |
| TCGA-30-1857 | GDF5OS    | ENST00000374375     | p.Y48Y   | c.144C>T  | Unverified | AGG | TAC | TCA | 3 | C | T |
| TCGA-30-1857 | GDF5OS_EN | ENST00000374375_v68 | p.Y48Y   | c.144C>T  | Unverified | AGG | TAC | TCA | 3 | C | T |
| TCGA-04-1342 | GDF6      | ENST00000287020     | p.D73D   | c.219C>T  | Verified   | cag | gac | gaa | 3 | C | T |
| TCGA-13-0916 | GDPD2     | ENST00000374382     | p.A165V  | c.494C>T  | Verified   | GCA | GCC | GCT | 2 | C | T |
| TCGA-13-0761 | GEMIN4    | ENST00000319004     | p.I402I  | c.1206C>T | Verified   | GAT | ATC | ACA | 3 | C | T |
| TCGA-13-0761 | GEMIN4    | ENST00000319004     | p.I402I  | c.1206C>T | Verified   | GAT | ATC | ACA | 3 | C | T |
| TCGA-13-0923 | GEMIN4    | ENST00000319004     | p.H285H  | c.855C>T  | Unverified | TAC | CAC | CAG | 3 | C | T |



|              |           |                 |          |           |            |     |     |     |   |   |   |
|--------------|-----------|-----------------|----------|-----------|------------|-----|-----|-----|---|---|---|
| TCGA-24-1843 | GFM1      | ENST00000486715 | p.R164C  | c.490C>T  | Unverified | AAG | CGC | TAC | 1 | C | T |
| TCGA-24-1422 | GGT7      | ENST00000336431 | p.L439L  | c.1317C>T | Verified   | ATG | CTC | AGC | 3 | C | T |
| TCGA-23-2077 | GIGYF2    | ENST00000373563 | p.A793V  | c.2378C>T | Verified   | GAG | GCT | CTG | 2 | C | T |
| TCGA-09-2056 | GIMAP4    | ENST00000255945 | p.T39T   | c.117C>T  | Verified   | AAA | ACC | GGA | 3 | C | T |
| TCGA-24-2262 | GJA8      | ENST00000369235 | p.A96V   | c.287C>T  | Verified   | CAC | GCG | GTG | 2 | C | T |
| TCGA-29-1690 | GJD4      | ENST00000321660 | p.L87F   | c.259C>T  | Unverified | CTC | CTC | CCC | 1 | C | T |
| TCGA-23-1022 | GLDN      | ENST00000335449 | p.S223S  | c.669C>T  | Verified   | GTG | TCC | AAC | 3 | C | T |
| TCGA-23-1120 | GLG1      | ENST00000205061 | p.L880F  | c.2638C>T | Unverified | ACC | CTC | ATG | 1 | C | T |
| TCGA-61-1914 | GLG1      | ENST00000205061 | p.T783T  | c.2349C>T | Unverified | ACG | ACC | GTG | 3 | C | T |
| TCGA-09-0369 | GLI2      | ENST00000361492 | p.T648T  | c.1944C>T | Unverified | AAG | ACC | GAG | 3 | C | T |
| TCGA-09-0369 | GLI2      | ENST00000361492 | p.T648T  | c.1944C>T | Unverified | AAG | ACC | GAG | 3 | C | T |
| TCGA-61-1737 | GLI2      | ENST00000361492 | p.D1435D | c.4305C>T | Unverified | CAG | GAC | GCA | 3 | C | T |
| TCGA-29-1766 | GLRA4     | XM_497139.1     | p.L119F  | c.355C>T  | Unverified | gac | ctc | gat | 1 | C | T |
| TCGA-29-1766 | GLRA4_ENS | ENST00000372617 | p.L119F  | c.355C>T  | Unverified | GAC | CTC | GAT | 1 | C | T |
| TCGA-23-1111 | GLT25D1   | ENST00000252599 | p.D91D   | c.273C>T  | Unverified | ACG | GAC | CAC | 3 | C | T |
| TCGA-61-1733 | GLT8D2    | ENST00000360814 | p.A179V  | c.536C>T  | Unverified | GCG | GCG | GCT | 2 | C | T |
| TCGA-61-1733 | GLT8D2    | ENST00000360814 | p.A179V  | c.536C>T  | Unverified | GCG | GCG | GCT | 2 | C | T |
| TCGA-13-0924 | GMPS      | ENST00000496455 | p.Q626*  | c.1876C>T | Verified   | ctt | caa | aag | 1 | C | T |
| TCGA-20-1687 | GNB1      | ENST00000378609 | p.C114C  | c.342C>T  | Unverified | gcc | tgc | ggt | 3 | C | T |
| TCGA-25-2042 | GNL1      | ENST00000376621 | p.P467S  | c.1399C>T | Verified   | GAC | CCC | TCA | 1 | C | T |
| TCGA-04-1367 | GNL2      | ENST00000373062 | p.F427F  | c.1281C>T | Verified   | GCT | TTC | CGG | 3 | C | T |
| TCGA-09-1674 | GNPTAB    | ENST00000299314 | p.R46*   | c.136C>T  | Unverified | AGC | CGA | GAT | 1 | C | T |
| TCGA-24-1616 | GNPTAB    | ENST00000299314 | p.Q1075* | c.3223C>T | Verified   | ACT | CAG | GAA | 1 | C | T |
| TCGA-61-2008 | GOLGA5    | ENST00000163416 | p.L492F  | c.1474C>T | Verified   | CAG | CTC | AGA | 1 | C | T |
| TCGA-24-2024 | GOLGB1    | ENST00000340645 | p.S2612F | c.7835C>T | Verified   | ATA | TCC | CAG | 2 | C | T |
| TCGA-61-2012 | GON4L     | ENST00000361040 | p.A784V  | c.2351C>T | Verified   | ACT | GCG | AAT | 2 | C | T |
| TCGA-24-1435 | GORASP1   | ENST00000319283 | p.R106C  | c.316C>T  | Verified   | TTC | CGC | AGG | 1 | C | T |
| TCGA-61-2109 | GOSR1     | ENST00000225724 | p.S200L  | c.599C>T  | Unverified | AAG | TCA | ATT | 2 | C | T |
| TCGA-29-1777 | GP2       | ENST00000381362 | p.L491L  | c.1471C>T | Unverified | GAC | CTA | GCC | 1 | C | T |
| TCGA-13-0714 | GPATCH2   | ENST00000366935 | p.P482S  | c.1444C>T | Verified   | ACG | CCT | GGG | 1 | C | T |
| TCGA-09-2050 | GPATCH4   | ENST00000368232 | p.T4T    | c.12C>T   | Verified   | GTC | ACC | CCA | 3 | C | T |
| TCGA-13-0886 | GPBP1L1   | ENST00000290795 | p.S126S  | c.378C>T  | Verified   | CAC | TCC | CGG | 3 | C | T |
| TCGA-23-2078 | GPCPD1    | ENST00000379019 | p.R629R  | c.1887C>T | Unverified | GAA | CGC | CTG | 3 | C | T |
| TCGA-24-1616 | GPD2      | ENST00000310454 | p.A708V  | c.2123C>T | Verified   | ACT | GCA | GAA | 2 | C | T |

|              |            |                 |         |           |            |     |     |     |   |   |   |
|--------------|------------|-----------------|---------|-----------|------------|-----|-----|-----|---|---|---|
| TCGA-61-1899 | GPR1       | ENST00000407325 | p.R149* | c.445C>T  | Unverified | CAT | CGA | ACC | 1 | C | T |
| TCGA-09-1674 | GPR110     | ENST00000371253 | p.R426W | c.1276C>T | Unverified | TCT | CGG | AAA | 1 | C | T |
| TCGA-25-1313 | GPR110     | ENST00000371253 | p.L382F | c.1144C>T | Verified   | ATC | CTT | AAT | 1 | C | T |
| TCGA-04-1336 | GPR112     | ENST00000394143 | p.S549L | c.1646C>T | Verified   | atg | tcg | aaa | 2 | C | T |
| TCGA-13-1505 | GPR113     | ENST00000333478 | p.A611A | c.1833C>T | Verified   | CAC | GCC | GCC | 3 | C | T |
| TCGA-29-1690 | GPR113     | ENST00000333478 | p.H515H | c.1545C>T | Unverified | CCT | CAC | TGT | 3 | C | T |
| TCGA-29-1770 | GPR113     | ENST00000333478 | p.S425S | c.1275C>T | Unverified | TAC | AGC | ATC | 3 | C | T |
| TCGA-29-1690 | GPR113_EN: | ENST00000311519 | p.H714H | c.2142C>T | Unverified | CCT | CAC | TGT | 3 | C | T |
| TCGA-29-1770 | GPR113_EN: | ENST00000311519 | p.S624S | c.1872C>T | Unverified | TAC | AGC | ATC | 3 | C | T |
| TCGA-24-2289 | GPR116     | ENST00000265417 | p.Q786* | c.2356C>T | Unverified | ACC | CAA | GTA | 1 | C | T |
| TCGA-13-0760 | GPR119     | ENST00000276218 | p.L305F | c.913C>T  | Verified   | ttc | ctc | ctc | 1 | C | T |
| TCGA-25-2392 | GPR124     | ENST00000412232 | p.P384P | c.1152C>T | Verified   | TAT | CCC | TTC | 3 | C | T |
| TCGA-23-1022 | GPR128     | ENST00000273352 | p.P780L | c.2339C>T | Verified   | TCT | CCG | AGT | 2 | C | T |
| TCGA-23-1118 | GPR139     | ENST00000570682 | p.P256S | c.766C>T  | Verified   | GCG | CCC | ATC | 1 | C | T |
| TCGA-23-1029 | GPR142     | ENST00000335666 | p.F375F | c.1125C>T | Unverified | GTC | TTC | GTC | 3 | C | T |
| TCGA-29-1769 | GPR155     | ENST00000392551 | p.T584I | c.1751C>T | Unverified | TTT | ACA | AGC | 2 | C | T |
| TCGA-04-1651 | GPR158     | ENST00000376351 | p.R928C | c.2782C>T | Unverified | GAA | CGC | ACT | 1 | C | T |
| TCGA-04-1651 | GPR158     | ENST00000376351 | p.R928C | c.2782C>T | Unverified | GAA | CGC | ACT | 1 | C | T |
| TCGA-13-0923 | GPR173     | ENST00000332582 | p.V74V  | c.222C>T  | Unverified | GCC | GTC | TGC | 3 | C | T |
| TCGA-61-1998 | GPR25      | ENST00000304244 | p.T326T | c.978C>T  | Verified   | CGC | ACC | GGC | 3 | C | T |
| TCGA-25-1326 | GPR27      | ENST00000304411 | p.L292L | c.876C>T  | Verified   | CTG | CTC | TTC | 3 | C | T |
| TCGA-24-1849 | GPR31      | ENST00000366834 | p.L145L | c.435C>T  | Unverified | GCC | CTC | ACC | 3 | C | T |
| TCGA-61-1906 | GPR34      | ENST00000378142 | p.P34L  | c.101C>T  | Unverified | ccg | cca | caa | 2 | C | T |
| TCGA-61-1906 | GPR34      | ENST00000378142 | p.P34L  | c.101C>T  | Unverified | ccg | cca | caa | 2 | C | T |
| TCGA-61-1899 | GPR37      | ENST00000303921 | p.N585N | c.1755C>T | Unverified | GAC | AAC | GAG | 3 | C | T |
| TCGA-29-2427 | GPR63      | ENST00000369268 | p.N117N | c.351C>T  | Verified   | ATT | AAC | ATC | 3 | C | T |
| TCGA-24-2262 | GPR78      | ENST00000382487 | p.R235C | c.703C>T  | Unverified | CGG | CGC | CGC | 1 | C | T |
| TCGA-24-2280 | GPRC5A     | ENST00000014914 | p.S196F | c.587C>T  | Unverified | TCC | TCC | TTC | 2 | C | T |
| TCGA-29-1691 | GPRIN1     | ENST00000303991 | p.C98C  | c.294C>T  | Unverified | ACC | TGC | TTC | 3 | C | T |
| TCGA-13-0900 | GPT2       | ENST00000340124 | p.D97D  | c.291C>T  | Verified   | GGG | GAC | GCC | 3 | C | T |
| TCGA-24-1849 | GPX6       | ENST00000361902 | p.V207V | c.621C>T  | Unverified | ACA | GTC | AAG | 3 | C | T |
| TCGA-04-1331 | GRAMD1B    | ENST00000322282 | p.P415S | c.1243C>T | Verified   | CAT | CCA | TGG | 1 | C | T |
| TCGA-61-2113 | GRAMD1B    | ENST00000322282 | p.P208S | c.622C>T  | Unverified | AAG | CCT | CTG | 1 | C | T |
| TCGA-04-1649 | GRAMD4     | ENST00000361034 | p.L312F | c.934C>T  | Unverified | AAC | CTT | TTC | 1 | C | T |

|              |            |                     |          |           |            |     |     |     |   |   |   |
|--------------|------------|---------------------|----------|-----------|------------|-----|-----|-----|---|---|---|
| TCGA-13-0793 | GRB2       | ENST00000392564     | p.V185V  | c.555C>T  | Verified   | cat | gtc | atg | 3 | C | T |
| TCGA-29-1698 | GREB1_ENS  | ENST00000381486     | p.I1349I | c.4047C>T | Unverified | CAG | ATC | GGG | 3 | C | T |
| TCGA-13-1505 | GRIA1      | ENST00000285900     | p.N425N  | c.1275C>T | Verified   | AAG | AAC | GCC | 3 | C | T |
| TCGA-13-0884 | GRID1      | ENST00000327946     | p.G479G  | c.1437C>T | Verified   | CTG | GGC | TTT | 3 | C | T |
| TCGA-24-2290 | GRIK3      | ENST00000373091     | p.T118T  | c.354C>T  | Verified   | TGC | ACC | AAT | 3 | C | T |
| TCGA-24-2290 | GRIK3      | ENST00000373091     | p.T118T  | c.354C>T  | Verified   | TGC | ACC | AAT | 3 | C | T |
| TCGA-61-2102 | GRIK3      | ENST00000373091     | p.P131P  | c.393C>T  | Verified   | GTG | CCC | CAC | 3 | C | T |
| TCGA-04-1530 | GRIK3      | ENST00000373091     | p.Y745Y  | c.2235C>T | Unverified | GAG | TAC | GTC | 3 | C | T |
| TCGA-09-1665 | GRIK4      | ENST00000527524     | p.I207I  | c.621C>T  | Verified   | GAG | ATC | CGG | 3 | C | T |
| TCGA-04-1342 | GRIP2      | ENST00000273083     | p.R951W  | c.2851C>T | Unverified | ATG | CGG | CAT | 1 | C | T |
| TCGA-25-1318 | GRK1       | NM_002929.2         | p.A14V   | c.41C>T   | Verified   | tct | gcc | ttc | 2 | C | T |
| TCGA-25-1318 | GRK1       | NM_002929.2         | p.A14V   | c.41C>T   | Verified   | tct | gcc | ttc | 2 | C | T |
| TCGA-13-1505 | GRLF1_ENS1 | ENST00000317082_v61 | p.R1145* | c.3433C>T | Unverified | GAG | CGA | GGG | 1 | C | T |
| TCGA-25-2398 | GRLF1_ENS1 | ENST00000317082_v61 | p.Q586*  | c.1756C>T | Verified   | AAT | CAG | AAA | 1 | C | T |
| TCGA-13-0905 | GRM6       | ENST00000231188     | p.P573S  | c.1717C>T | Verified   | CGC | CCC | ACA | 1 | C | T |
| TCGA-24-0979 | GRM7       | ENST00000389335     | p.T377M  | c.1130C>T | Verified   | TTG | ACG | ATT | 2 | C | T |
| TCGA-29-1783 | GRM8       | ENST00000339582     | p.S219L  | c.656C>T  | Unverified | GTT | TCG | ACA | 2 | C | T |
| TCGA-29-1783 | GRM8_ENS1  | ENST00000405249     | p.S219L  | c.656C>T  | Unverified | GTT | TCG | ACA | 2 | C | T |
| TCGA-25-2401 | GSG1L      | ENST00000380897     | p.S71F   | c.212C>T  | Verified   | GGC | TCC | TTT | 2 | C | T |
| TCGA-61-2113 | GSK3A      | ENST00000222330     | p.S482S  | c.1446C>T | Verified   | AAC | TCC | TCC | 3 | C | T |
| TCGA-24-2024 | GSPT2      | ENST00000340438     | p.D16D   | c.48C>T   | Verified   | tgg | gac | cag | 3 | C | T |
| TCGA-30-1718 | GTF2B      | ENST00000370500     | p.R185*  | c.553C>T  | Unverified | TCA | CGA | ATT | 1 | C | T |
| TCGA-24-2280 | GTF2IRD1   | ENST00000265755     | p.C15C   | c.45C>T   | Unverified | GGC | TGC | GGA | 3 | C | T |
| TCGA-20-1687 | GTF2IRD2B  | ENST00000312575     | p.T876M  | c.2627C>T | Unverified | AAC | ACG | GTC | 2 | C | T |
| TCGA-61-1998 | GTPBP4     | ENST00000360803     | p.I280I  | c.840C>T  | Verified   | TTC | ATC | AAC | 3 | C | T |
| TCGA-24-1847 | GTPBP5     | ENST00000370823     | p.G281G  | c.843C>T  | Unverified | CCC | GGC | ATC | 3 | C | T |
| TCGA-13-0916 | GUCY1A2    | ENST00000526355     | p.Y572Y  | c.1716C>T | Verified   | GCC | TAC | TGT | 3 | C | T |
| TCGA-09-1665 | GUCY2C     | ENST00000261170     | p.T682I  | c.2045C>T | Verified   | TAC | ACT | TTG | 2 | C | T |
| TCGA-23-1116 | GYS1       | ENST00000323798     | p.A215A  | c.645C>T  | Verified   | TGT | GCC | GGT | 3 | C | T |
| TCGA-61-1913 | GYS1       | ENST00000323798     | p.F22F   | c.66C>T   | Unverified | GAA | TTC | GAC | 3 | C | T |
| TCGA-13-1507 | H2BFM      | XM_210048.3         | p.R88C   | c.262C>T  | Verified   | aac | cgc | cgt | 1 | C | T |
| TCGA-13-1498 | HAAO       | ENST00000294973     | p.S270F  | c.809C>T  | Verified   | GGC | TCT | GTG | 2 | C | T |
| TCGA-13-1498 | HAL        | ENST00000261208     | p.V579V  | c.1737C>T | Verified   | AAG | GTC | TAT | 3 | C | T |
| TCGA-13-1489 | HAO1       | ENST00000378789     | p.R4W    | c.10C>T   | Verified   | CCC | CGG | CTA | 1 | C | T |

|              |            |                 |          |            |            |     |     |     |   |   |   |
|--------------|------------|-----------------|----------|------------|------------|-----|-----|-----|---|---|---|
| TCGA-13-0913 | HAPLN3     | ENST00000359595 | p.N174N  | c.522C>T   | Unverified | CCC | AAC | GGG | 3 | C | T |
| TCGA-13-1507 | HCAR1      | ENST00000356987 | p.H121H  | c.363C>T   | Verified   | CCC | CAC | CAC | 3 | C | T |
| TCGA-29-1764 | HCFC1      | NM_005334.1     | p.T637T  | c.1911C>T  | Unverified | acc | acc | atc | 3 | C | T |
| TCGA-09-2049 | HCFC1_ENST | ENST00000310441 | p.R37C   | c.109C>T   | Verified   | CAC | CGC | GCC | 1 | C | T |
| TCGA-29-1764 | HCFC1_ENST | ENST00000310441 | p.T734T  | c.2202C>T  | Unverified | ACC | ACC | ATC | 3 | C | T |
| TCGA-13-0920 | HCFC2      | ENST00000229330 | p.T458M  | c.1373C>T  | Verified   | CTG | ACG | GAT | 2 | C | T |
| TCGA-29-1701 | HCN3       | ENST00000368358 | p.G313G  | c.939C>T   | Unverified | ATT | GGC | TAT | 3 | C | T |
| TCGA-61-1913 | HCN4       | ENST00000261917 | p.H512H  | c.1536C>T  | Unverified | GGC | CAC | GCC | 3 | C | T |
| TCGA-13-0904 | HDAC6      | ENST00000334136 | p.L147L  | c.439C>T   | Verified   | agc | cta | gaa | 1 | C | T |
| TCGA-24-2288 | HDC        | ENST00000267845 | p.A343A  | c.1029C>T  | Unverified | GTG | GCC | ACC | 3 | C | T |
| TCGA-29-1691 | HDX        | ENST00000297977 | p.L278L  | c.832C>T   | Unverified | att | ctg | gga | 1 | C | T |
| TCGA-61-1895 | HECTD1     | ENST00000399332 | p.R1055* | c.3163C>T  | Unverified | GTT | CGA | AAA | 1 | C | T |
| TCGA-13-1498 | HECW2      | ENST00000260983 | p.D354D  | c.1062C>T  | Verified   | gat | gac | gag | 3 | C | T |
| TCGA-13-1499 | HECW2      | ENST00000260983 | p.R867R  | c.2601C>T  | Verified   | atc | cgc | aga | 3 | C | T |
| TCGA-24-1469 | HEPH       | NM_138737.1     | p.A306V  | c.917C>T   | Verified   | aca | gca | ttt | 2 | C | T |
| TCGA-13-1497 | HEPH       | NM_138737.1     | p.A525A  | c.1575C>T  | Verified   | cat | gcc | ggt | 3 | C | T |
| TCGA-04-1347 | HEPHL1     | ENST00000315765 | p.A7V    | c.20C>T    | Verified   | CCA | GCT | GGC | 2 | C | T |
| TCGA-29-1761 | HEPN1      | ENST00000408930 | p.F66F   | c.198C>T   | Unverified | CTG | TTC | AAT | 3 | C | T |
| TCGA-13-0760 | HERC1      | ENST00000443617 | p.H3625Y | c.10873C>T | Verified   | GCA | CAT | AAG | 1 | C | T |
| TCGA-23-2078 | HERC1      | ENST00000443617 | p.I2785I | c.8355C>T  | Verified   | AAT | ATC | ACT | 3 | C | T |
| TCGA-09-2051 | HERC2      | NM_004667.3     | p.R1725W | c.5173C>T  | Unverified | aat | cgg | atg | 1 | C | T |
| TCGA-24-1469 | HERC2      | NM_004667.3     | p.L2162L | c.6486C>T  | Verified   | ggg | ctc | atc | 3 | C | T |
| TCGA-61-2095 | HERC2      | NM_004667.3     | p.V1436V | c.4308C>T  | Unverified | gag | gtc | ggt | 3 | C | T |
| TCGA-24-0979 | HERC5      | NM_016323.1     | p.R885W  | c.2653C>T  | Verified   | ttt | cgg | aga | 1 | C | T |
| TCGA-04-1356 | HERC6_ENST | ENST00000264346 | p.A249V  | c.746C>T   | Verified   | ACT | GCG | GTG | 2 | C | T |
| TCGA-61-1733 | HERPUD2    | ENST00000396081 | p.Q316*  | c.946C>T   | Unverified | CAC | CAA | GCT | 1 | C | T |
| TCGA-61-1733 | HERPUD2    | ENST00000396081 | p.Q316*  | c.946C>T   | Unverified | CAC | CAA | GCT | 1 | C | T |
| TCGA-23-1022 | HEXA       | ENST00000268097 | p.Y435Y  | c.1305C>T  | Verified   | TTC | TAC | ATA | 3 | C | T |
| TCGA-25-2042 | HEYL       | ENST00000372852 | p.S10S   | c.30C>T    | Verified   | GGC | TCC | GAC | 3 | C | T |
| TCGA-30-1718 | HGS        | ENST00000329138 | p.A301V  | c.902C>T   | Unverified | TCA | GCG | CCC | 2 | C | T |
| TCGA-29-1703 | HHATL      | ENST00000310417 | p.G167G  | c.501C>T   | Unverified | ACA | GGC | ACT | 3 | C | T |
| TCGA-23-1122 | HIC2       | ENST00000407464 | p.T577M  | c.1730C>T  | Unverified | CTC | ACG | GAG | 2 | C | T |
| TCGA-61-1740 | HIGD2BP    | ENST00000311755 | p.R41C   | c.121C>T   | Unverified | CTT | CGC | AAG | 1 | C | T |
| TCGA-13-1489 | HIPK2      | NM_022740       | p.T772I  | c.2315C>T  | Verified   | ttg | acc | ggt | 2 | C | T |

|              |            |                 |          |            |            |     |     |     |   |   |   |
|--------------|------------|-----------------|----------|------------|------------|-----|-----|-----|---|---|---|
| TCGA-24-2280 | HIST1H1A   | ENST00000244573 | p.A71V   | c.212C>T   | Unverified | GCG | GCC | GCA | 2 | C | T |
| TCGA-13-0714 | HIST1H1C   | ENST00000343677 | p.A61V   | c.182C>T   | Verified   | gct | gct | ctg | 2 | C | T |
| TCGA-23-1111 | HIST1H2AG  | ENST00000359193 | p.L35F   | c.103C>T   | Unverified | CTG | CTC | CGC | 1 | C | T |
| TCGA-61-1733 | HIST1H2BC  | ENST00000396984 | p.V119V  | c.357C>T   | Unverified | GCC | GTC | ACC | 3 | C | T |
| TCGA-61-1733 | HIST1H2BC  | ENST00000396984 | p.V119V  | c.357C>T   | Unverified | GCC | GTC | ACC | 3 | C | T |
| TCGA-13-1488 | HIST1H2BH  | ENST00000356350 | p.P11L   | c.32C>T    | Verified   | GCC | CCG | AAG | 2 | C | T |
| TCGA-29-1766 | HIST1H2BK  | ENST00000356950 | p.A118A  | c.354C>T   | Unverified | AAG | GCC | GTC | 3 | C | T |
| TCGA-29-1766 | HIST1H2BK_ | ENST00000396891 | p.A118A  | c.354C>T   | Unverified | AAG | GCC | GTC | 3 | C | T |
| TCGA-13-1499 | HIST1H4H   | ENST00000377727 | p.A16V   | c.47C>T    | Verified   | GGA | GCT | AAG | 2 | C | T |
| TCGA-09-2044 | HIST2H2AC  | ENST00000331380 | p.Q25*   | c.73C>T    | Verified   | CTC | CAG | TTC | 1 | C | T |
| TCGA-13-1509 | HIST2H3PS2 | ENST00000369176 | p.R9C    | c.25C>T    | Verified   | GCC | CGC | AAG | 1 | C | T |
| TCGA-29-1693 | HIVEP1     | ENST00000379388 | p.G1350G | c.4050C>T  | Unverified | GCT | GGC | TTG | 3 | C | T |
| TCGA-20-0991 | HIVEP3     | ENST00000372583 | p.S1504L | c.4511C>T  | Verified   | TCC | TCA | GAT | 2 | C | T |
| TCGA-29-1775 | HK2        | ENST00000290573 | p.R849C  | c.2545C>T  | Unverified | aac | cgt | ggg | 1 | C | T |
| TCGA-23-1031 | HKR1       | ENST00000324411 | p.P147S  | c.439C>T   | Verified   | AAT | CCT | CTC | 1 | C | T |
| TCGA-61-1910 | HLA-DQB2   | ENST00000411527 | p.L225F  | c.673C>T   | Unverified | GGA | CTC | CTG | 1 | C | T |
| TCGA-09-2051 | HMCN1      | ENST00000271588 | p.P997L  | c.2990C>T  | Unverified | ATT | CCA | GTA | 2 | C | T |
| TCGA-04-1347 | HMCN1      | ENST00000271588 | p.C5470C | c.16410C>T | Verified   | ACA | TGC | CAA | 3 | C | T |
| TCGA-13-1499 | HMCN1      | ENST00000271588 | p.H1910H | c.5730C>T  | Verified   | CAG | CAC | ATT | 3 | C | T |
| TCGA-24-2289 | HMGCL      | ENST00000374490 | p.L281L  | c.841C>T   | Unverified | GAC | CTG | GTC | 1 | C | T |
| TCGA-13-0920 | HMGCS2     | ENST00000369406 | p.F420F  | c.1260C>T  | Verified   | AGT | TTC | TTT | 3 | C | T |
| TCGA-13-0795 | HMOX1      | ENST00000216117 | p.D92D   | c.276C>T   | Verified   | CAG | GAC | CTG | 3 | C | T |
| TCGA-61-1740 | HNF1A      | ENST00000257555 | p.S337S  | c.1011C>T  | Unverified | AGC | AGC | GGC | 3 | C | T |
| TCGA-09-1674 | HNRNPA0    | ENST00000314940 | p.G236G  | c.708C>T   | Unverified | GGA | GGC | GGC | 3 | C | T |
| TCGA-23-1809 | HNRNPA3    | ENST00000392524 | p.G278G  | c.834C>T   | Unverified | TAT | GGC | GGT | 3 | C | T |
| TCGA-61-1900 | HNRNPL     | ENST00000221419 | p.H587H  | c.1761C>T  | Unverified | CAG | CAC | GCC | 3 | C | T |
| TCGA-61-1900 | HNRPL      | ENST00000388749 | p.H454H  | c.1362C>T  | Unverified | CAG | CAC | GCC | 3 | C | T |
| TCGA-29-1766 | HOMER1     | ENST00000334082 | p.T9I    | c.26C>T    | Unverified | AGC | ACT | CGA | 2 | C | T |
| TCGA-24-1844 | HOOK2      | ENST00000397668 | p.Q281*  | c.841C>T   | Unverified | AAC | CAG | GCG | 1 | C | T |
| TCGA-13-0760 | HOOK2      | ENST00000397668 | p.A274V  | c.821C>T   | Verified   | GTT | GCG | GAG | 2 | C | T |
| TCGA-61-1737 | HOOK2      | ENST00000397668 | p.D592D  | c.1776C>T  | Unverified | GCG | GAC | TTG | 3 | C | T |
| TCGA-61-2102 | HOXA10     | ENST00000283921 | p.G23G   | c.69C>T    | Unverified | GAG | AGC | CCC | 3 | C | T |
| TCGA-61-1914 | HOXA2      | ENST00000222718 | p.I135I  | c.405C>T   | Unverified | GAA | ATC | GCC | 3 | C | T |
| TCGA-24-1423 | HPCA       | ENST00000373467 | p.D60D   | c.180C>T   | Verified   | GGT | GAC | GCC | 3 | C | T |

|              |             |                 |          |            |            |     |     |     |   |   |   |
|--------------|-------------|-----------------|----------|------------|------------|-----|-----|-----|---|---|---|
| TCGA-13-0924 | HPS3        | ENST00000296051 | p.P656L  | c.1967C>T  | Verified   | AAT | CCT | TTA | 2 | C | T |
| TCGA-13-1481 | HR          | ENST00000381418 | p.A588A  | c.1764C>T  | Verified   | CCA | GCC | GTG | 3 | C | T |
| TCGA-29-1763 | HRNR        | ENST00000368801 | p.S358S  | c.1074C>T  | Unverified | CAG | TCC | TCT | 3 | C | T |
| TCGA-61-1915 | HS3ST4      | ENST00000331351 | p.L323L  | c.967C>T   | Unverified | GGG | CTG | ATC | 1 | C | T |
| TCGA-61-1915 | HS3ST4_ENS  | ENST00000331351 | p.L323L  | c.967C>T   | Unverified | GGG | CTG | ATC | 1 | C | T |
| TCGA-24-1464 | HSD17B2     | ENST00000199936 | p.P340S  | c.1018C>T  | Verified   | ACG | CCA | GGG | 1 | C | T |
| TCGA-61-1906 | HSPG2       | ENST00000374695 | p.Y3867Y | c.11601C>T | Unverified | AGC | TAC | GTG | 3 | C | T |
| TCGA-61-1906 | HSPG2       | ENST00000374695 | p.Y3867Y | c.11601C>T | Unverified | AGC | TAC | GTG | 3 | C | T |
| TCGA-24-1431 | HTR1A       | ENST00000323865 | p.A60V   | c.179C>T   | Verified   | GCT | GCC | ATC | 2 | C | T |
| TCGA-24-1846 | HTR1E       | ENST00000369584 | p.Y213Y  | c.639C>T   | Unverified | CTT | TAC | CAG | 3 | C | T |
| TCGA-13-0923 | HTR2C       | ENST00000371951 | p.P188L  | c.563C>T   | Verified   | ggt | cct | atc | 2 | C | T |
| TCGA-13-0916 | HTR7        | ENST00000336152 | p.V206V  | c.618C>T   | Verified   | TCC | GTC | TGG | 3 | C | T |
| TCGA-29-1691 | HTT         | ENST00000355072 | p.P2849L | c.8546C>T  | Unverified | GGG | CCG | GAA | 2 | C | T |
| TCGA-13-1505 | HTT         | ENST00000355072 | p.S1950S | c.5850C>T  | Unverified | GCC | AGC | GGC | 3 | C | T |
| TCGA-13-1505 | HUNK        | ENST00000270112 | p.S454F  | c.1361C>T  | Unverified | ttc | tcc | aag | 2 | C | T |
| TCGA-25-2400 | IBTK        | ENST00000306270 | p.N656N  | c.1968C>T  | Verified   | AAA | AAC | CCA | 3 | C | T |
| TCGA-61-2008 | ICAM2       | ENST00000449662 | p.Q72*   | c.214C>T   | Verified   | GAA | CAG | GCT | 1 | C | T |
| TCGA-24-1845 | IFI44L      | ENST00000342282 | p.R7C    | c.19C>T    | Unverified | AGC | CGT | CAG | 1 | C | T |
| TCGA-24-1845 | IFI44L_ENST | ENST00000370751 | p.R46C   | c.136C>T   | Unverified | AGC | CGT | CAG | 1 | C | T |
| TCGA-23-1022 | IPLTD1      | ENST00000282881 | p.A210V  | c.629C>T   | Verified   | GCA | GCA | TCT | 2 | C | T |
| TCGA-24-1616 | IFNA17      | ENST00000413767 | p.P62P   | c.186C>T   | Unverified | CTT | CCC | CAG | 3 | C | T |
| TCGA-24-2267 | IFNA4       | ENST00000421715 | p.L119L  | c.355C>T   | Verified   | GAC | CTG | GAA | 1 | C | T |
| TCGA-20-1683 | IFNGR2      | ENST00000290219 | p.N42N   | c.126C>T   | Unverified | tac | aac | gca | 3 | C | T |
| TCGA-61-2094 | IFNW1       | ENST00000380229 | p.L185L  | c.553C>T   | Unverified | AGA | CTG | AGA | 1 | C | T |
| TCGA-13-0795 | IFT140      | ENST00000426508 | p.R158W  | c.472C>T   | Verified   | TTC | CGG | CTC | 1 | C | T |
| TCGA-09-2049 | IFT140      | ENST00000426508 | p.D972D  | c.2916C>T  | Unverified | ATG | GAC | GCC | 3 | C | T |
| TCGA-13-0890 | IFT172      | ENST00000260570 | p.T35I   | c.104C>T   | Verified   | TGC | ACA | GTG | 2 | C | T |
| TCGA-09-1665 | IGF2R       | ENST00000356956 | p.F2246F | c.6738C>T  | Verified   | TTC | TTC | CAC | 3 | C | T |
| TCGA-23-1116 | IGSF1       | ENST00000361420 | p.L956L  | c.2868C>T  | Unverified | TAT | CTC | AGT | 3 | C | T |
| TCGA-23-1032 | IGSF10      | ENST00000282466 | p.T1381I | c.4142C>T  | Verified   | ACC | ACA | GCC | 2 | C | T |
| TCGA-29-1691 | IGSF21      | ENST00000251296 | p.R288C  | c.862C>T   | Unverified | CTG | CGC | CAC | 1 | C | T |
| TCGA-30-1714 | IGSF21      | ENST00000251296 | p.A201V  | c.602C>T   | Unverified | GCT | GCG | AGC | 2 | C | T |
| TCGA-13-1496 | IGSF21      | ENST00000251296 | p.D393D  | c.1179C>T  | Verified   | TTC | GAC | GGG | 3 | C | T |
| TCGA-24-1616 | IGSF3       | ENST00000369486 | p.R21W   | c.61C>T    | Verified   | CAG | CGG | CAG | 1 | C | T |

|              |          |                 |          |           |            |     |     |     |   |   |   |
|--------------|----------|-----------------|----------|-----------|------------|-----|-----|-----|---|---|---|
| TCGA-13-1481 | IGSF9    | ENST00000361509 | p.R645W  | c.1933C>T | Verified   | GGC | CGG | CAA | 1 | C | T |
| TCGA-20-1687 | IGSF9    | ENST00000361509 | p.T258I  | c.773C>T  | Unverified | CTC | ACC | TAC | 2 | C | T |
| TCGA-29-1705 | IKBKE    | ENST00000367120 | p.Q655*  | c.1963C>T | Unverified | CTT | CAG | GAC | 1 | C | T |
| TCGA-24-1616 | IKBKE    | ENST00000367120 | p.A371V  | c.1112C>T | Verified   | ATC | GCC | CAC | 2 | C | T |
| TCGA-13-0924 | IKBKE    | ENST00000367120 | p.P400P  | c.1200C>T | Verified   | GTC | CCC | AAG | 3 | C | T |
| TCGA-29-1784 | IL1RAPL2 | ENST00000372582 | p.P604S  | c.1810C>T | Unverified | ctc | cct | gaa | 1 | C | T |
| TCGA-04-1338 | IL20RB   | ENST00000329582 | p.T146T  | c.438C>T  | Verified   | ATC | ACC | AAA | 3 | C | T |
| TCGA-29-1696 | IL25     | ENST00000329715 | p.H107H  | c.321C>T  | Unverified | TAC | CAC | GCC | 3 | C | T |
| TCGA-29-1696 | IL25     | ENST00000329715 | p.H107H  | c.321C>T  | Unverified | TAC | CAC | GCC | 3 | C | T |
| TCGA-29-1691 | IL8      | ENST00000307407 | p.T39I   | c.116C>T  | Unverified | AAG | ACA | TAC | 2 | C | T |
| TCGA-13-0913 | ILF3     | ENST00000318511 | p.S503S  | c.1509C>T | Verified   | GTC | TCC | ACC | 3 | C | T |
| TCGA-04-1338 | IMMT     | ENST00000410111 | p.S150F  | c.449C>T  | Unverified | ATT | TCT | GCA | 2 | C | T |
| TCGA-23-1031 | IMPG1    | ENST00000369950 | p.P482S  | c.1444C>T | Verified   | ATC | CCC | ACC | 1 | C | T |
| TCGA-24-0979 | INADL    | ENST00000371158 | p.H66Y   | c.196C>T  | Verified   | AAC | CAT | ATA | 1 | C | T |
| TCGA-24-1844 | INADL    | ENST00000371158 | p.R1261C | c.3781C>T | Unverified | TCA | CGC | ATG | 1 | C | T |
| TCGA-25-2398 | INO80    | ENST00000361937 | p.D1379D | c.4137C>T | Verified   | AGT | GAC | ATG | 3 | C | T |
| TCGA-25-2398 | INOC1    | ENST00000361937 | p.D1379D | c.4137C>T | Verified   | agt | gac | atg | 3 | C | T |
| TCGA-13-0762 | INSC     | ENST00000379554 | p.R3W    | c.7C>T    | Verified   | AGA | CGG | CCC | 1 | C | T |
| TCGA-13-0762 | INSC     | ENST00000379554 | p.R3W    | c.7C>T    | Verified   | AGA | CGG | CCC | 1 | C | T |
| TCGA-04-1367 | INSC     | ENST00000379554 | p.P5L    | c.14C>T   | Verified   | CCC | CCT | GGC | 2 | C | T |
| TCGA-61-2008 | INSR     | ENST00000302850 | p.S787S  | c.2361C>T | Verified   | ACC | AGC | GTG | 3 | C | T |
| TCGA-24-2035 | INTS3    | ENST00000318967 | p.F285F  | c.855C>T  | Verified   | CAG | TTC | ACA | 3 | C | T |
| TCGA-20-0991 | INTS4    | ENST00000534064 | p.N421N  | c.1263C>T | Verified   | TTC | AAC | GAT | 3 | C | T |
| TCGA-09-2049 | INTS5    | ENST00000330574 | p.S240S  | c.720C>T  | Verified   | ATT | TCC | CGG | 3 | C | T |
| TCGA-29-1690 | IPO13    | ENST00000372343 | p.H756Y  | c.2266C>T | Unverified | GCT | CAT | GAG | 1 | C | T |
| TCGA-24-1843 | IPO13    | ENST00000372343 | p.T430M  | c.1289C>T | Unverified | GAC | ACG | CTC | 2 | C | T |
| TCGA-61-1904 | IPO4     | ENST00000354464 | p.T784T  | c.2352C>T | Unverified | GGG | ACC | CTC | 3 | C | T |
| TCGA-13-0900 | IQCF1    | ENST00000310914 | p.R141C  | c.421C>T  | Verified   | ATC | CGC | AGA | 1 | C | T |
| TCGA-61-2008 | IQCH     | ENST00000335894 | p.T966T  | c.2898C>T | Verified   | ATG | ACC | TTT | 3 | C | T |
| TCGA-04-1367 | IQGAP2   | ENST00000274364 | p.Q115*  | c.343C>T  | Verified   | GTC | CAG | TGG | 1 | C | T |
| TCGA-13-1497 | IQGAP3   | ENST00000361170 | p.L237L  | c.709C>T  | Verified   | CTT | CTG | GAG | 1 | C | T |
| TCGA-61-1915 | IQUB     | ENST00000324698 | p.A565V  | c.1694C>T | Unverified | ATT | GCG | ACA | 2 | C | T |
| TCGA-13-0919 | IRF2BPL  | ENST00000238647 | p.P196L  | c.587C>T  | Unverified | GGC | CCA | AAC | 2 | C | T |
| TCGA-24-2024 | IRF3     | ENST00000309877 | p.P103S  | c.307C>T  | Verified   | GAC | CCA | CAT | 1 | C | T |

|              |            |                 |          |           |            |     |     |     |   |   |   |
|--------------|------------|-----------------|----------|-----------|------------|-----|-----|-----|---|---|---|
| TCGA-61-1740 | IRF6       | ENST00000367021 | p.P104S  | c.310C>T  | Unverified | GTG | CCC | ATG | 1 | C | T |
| TCGA-24-1464 | IRX1       | ENST00000302006 | p.A249A  | c.747C>T  | Verified   | aag | gcc | gag | 3 | C | T |
| TCGA-24-2289 | IRX1       | ENST00000302006 | p.F123F  | c.369C>T  | Unverified | cag | ttc | caa | 3 | C | T |
| TCGA-24-1843 | ITGA2      | NM_002203.2     | p.Q693*  | c.2077C>T | Unverified | aat | caa | gtg | 1 | C | T |
| TCGA-24-1843 | ITGA2_ENST | ENST00000296585 | p.Q693*  | c.2077C>T | Unverified | AAT | CAA | GTG | 1 | C | T |
| TCGA-25-1313 | ITGB3      | ENST00000262017 | p.D510D  | c.1530C>T | Unverified | cag | gac | gaa | 3 | C | T |
| TCGA-29-1777 | ITGBL1     | ENST00000376180 | p.T268I  | c.803C>T  | Unverified | GAC | ACC | TGT | 2 | C | T |
| TCGA-13-0791 | ITIH1      | ENST00000273283 | p.T685T  | c.2055C>T | Verified   | GAC | ACC | CTG | 3 | C | T |
| TCGA-61-1910 | ITIH1      | ENST00000273283 | p.I21I   | c.63C>T   | Unverified | CTC | ATC | CTG | 3 | C | T |
| TCGA-24-1422 | ITIH3      | ENST00000398670 | p.L14F   | c.40C>T   | Verified   | CTG | CTC | TCC | 1 | C | T |
| TCGA-24-2288 | ITIH5      | ENST00000256861 | p.P481L  | c.1442C>T | Unverified | ACC | CCG | CTC | 2 | C | T |
| TCGA-23-2078 | ITK        | ENST00000422843 | p.P159L  | c.476C>T  | Verified   | CCT | CCT | ACT | 2 | C | T |
| TCGA-25-1313 | ITPK1      | ENST00000267615 | p.S223L  | c.668C>T  | Unverified | ACA | TCA | GAC | 2 | C | T |
| TCGA-24-1470 | ITPKB      | NM_002221       | p.R48C   | c.142C>T  | Verified   | acg | cgt | ggc | 1 | C | T |
| TCGA-25-2392 | JAK1       | ENST00000342505 | p.T478T  | c.1434C>T | Verified   | ATG | ACC | GTC | 3 | C | T |
| TCGA-61-1740 | JAK2       | ENST00000381652 | p.S1115S | c.3345C>T | Unverified | CCC | TCC | TTT | 3 | C | T |
| TCGA-13-0900 | JAKMIP2    | ENST00000265272 | p.Q778*  | c.2332C>T | Unverified | TTA | CAG | CAA | 1 | C | T |
| TCGA-13-0900 | JAKMIP2    | ENST00000265272 | p.R204W  | c.610C>T  | Unverified | GAG | CGG | GAT | 1 | C | T |
| TCGA-09-2051 | JMJD1C     | ENST00000402544 | p.S100S  | c.300C>T  | Unverified | GAT | AGC | AGT | 3 | C | T |
| TCGA-29-1691 | JPH4       | ENST00000356300 | p.P453P  | c.1359C>T | Unverified | ACC | CCC | TCA | 3 | C | T |
| TCGA-13-0885 | KANK4      | ENST00000371153 | p.N669N  | c.2007C>T | Verified   | GTT | AAC | GGT | 3 | C | T |
| TCGA-13-0791 | KBTBD12    | ENST00000405109 | p.C557C  | c.1671C>T | Verified   | GTC | TGC | GGG | 3 | C | T |
| TCGA-04-1652 | KBTBD5     | ENST00000287777 | p.R402C  | c.1204C>T | Unverified | CCC | CGC | TGC | 1 | C | T |
| TCGA-04-1652 | KBTBD5     | ENST00000287777 | p.R402C  | c.1204C>T | Unverified | CCC | CGC | TGC | 1 | C | T |
| TCGA-13-0903 | KCMF1      | ENST00000409785 | p.S169L  | c.506C>T  | Verified   | AGA | TCA | AAC | 2 | C | T |
| TCGA-29-1783 | KCND3      | ENST00000369697 | p.R37W   | c.109C>T  | Unverified | AAG | CGG | CAG | 1 | C | T |
| TCGA-24-1463 | KCNH1      | ENST00000271751 | p.N941N  | c.2823C>T | Verified   | TTA | AAC | GCC | 3 | C | T |
| TCGA-04-1338 | KCNJ12     | ENST00000331718 | p.S343L  | c.1028C>T | Verified   | TAC | TCG | CAC | 2 | C | T |
| TCGA-13-0761 | KCNJ12     | ENST00000331718 | p.S343L  | c.1028C>T | Verified   | TAC | TCG | CAC | 2 | C | T |
| TCGA-13-0761 | KCNJ12     | ENST00000331718 | p.S343L  | c.1028C>T | Verified   | TAC | TCG | CAC | 2 | C | T |
| TCGA-13-1497 | KCNJ16     | ENST00000392670 | p.Y46Y   | c.138C>T  | Verified   | GTC | TAC | TTC | 3 | C | T |
| TCGA-29-1785 | KCNJ3      | ENST00000295101 | p.I167I  | c.501C>T  | Unverified | TCC | ATC | CTG | 3 | C | T |
| TCGA-29-1785 | KCNJ3      | ENST00000295101 | p.I167I  | c.501C>T  | Unverified | TCC | ATC | CTG | 3 | C | T |
| TCGA-23-1114 | KCNK13     | ENST00000282146 | p.I156I  | c.468C>T  | Unverified | TAC | ATC | ATG | 3 | C | T |



|              |            |                 |          |           |            |     |     |     |   |   |   |
|--------------|------------|-----------------|----------|-----------|------------|-----|-----|-----|---|---|---|
| TCGA-04-1331 | KCNK17     | ENST00000373231 | p.F135F  | c.405C>T  | Unverified | atc | ttc | ttt | 3 | C | T |
| TCGA-23-2078 | KCNMB1     | ENST00000274629 | p.D119D  | c.357C>T  | Verified   | GCC | GAC | GTG | 3 | C | T |
| TCGA-13-1496 | KCNS2      | ENST00000287042 | p.Y377Y  | c.1131C>T | Verified   | GGG | TAC | GGG | 3 | C | T |
| TCGA-13-0795 | KCNT2      | ENST00000294725 | p.P751P  | c.2253C>T | Verified   | AAT | CCC | ATA | 3 | C | T |
| TCGA-23-1110 | KCNU1      | ENST00000399881 | p.A424V  | c.1271C>T | Verified   | CAT | GCT | GAA | 2 | C | T |
| TCGA-29-1784 | KCNV1      | ENST00000524391 | p.H328Y  | c.982C>T  | Unverified | aga | cat | tcc | 1 | C | T |
| TCGA-29-1691 | KCNV1      | ENST00000524391 | p.A209V  | c.626C>T  | Unverified | gct | gcc | cgt | 2 | C | T |
| TCGA-23-1029 | KCTD17     | ENST00000352736 | p.P275P  | c.825C>T  | Unverified | GCA | CCC | GGA | 3 | C | T |
| TCGA-61-1740 | KCTD20     | ENST00000373731 | p.H4Y    | c.10C>T   | Unverified | GTT | CAC | CGT | 1 | C | T |
| TCGA-23-2077 | KDELC2     | ENST00000323468 | p.T376T  | c.1128C>T | Verified   | GGG | ACC | GTG | 3 | C | T |
| TCGA-13-0760 | KDM2A      | ENST00000529006 | p.R1117C | c.3349C>T | Verified   | cgg | cgc | att | 1 | C | T |
| TCGA-09-2049 | KDM5A      | NM_005056.1     | p.L1229F | c.3685C>T | Verified   | tca | ctc | ctg | 1 | C | T |
| TCGA-30-1718 | KDM5A      | NM_005056.1     | p.L1453F | c.4357C>T | Unverified | gaa | ctt | atg | 1 | C | T |
| TCGA-30-1718 | KDM5A_ENS  | ENST00000399788 | p.L1448F | c.4342C>T | Unverified | GAA | CTT | ATG | 1 | C | T |
| TCGA-09-2056 | KDM5C      | ENST00000375401 | p.P1429L | c.4286C>T | Verified   | CCC | CCA | GAC | 2 | C | T |
| TCGA-24-2289 | KDM6B      | XM_043272.9     | p.T1276T | c.3828C>T | Unverified | acc | acc | att | 3 | C | T |
| TCGA-24-1846 | KDR        | ENST00000263923 | p.H1144Y | c.3430C>T | Unverified | tgg | cac | ggg | 1 | C | T |
| TCGA-23-1021 | KEL        | ENST00000355265 | p.A491V  | c.1472C>T | Verified   | CTG | GCC | CGA | 2 | C | T |
| TCGA-24-1469 | KIAA0090   | ENST00000477853 | p.S287F  | c.860C>T  | Verified   | GCT | TCC | CGG | 2 | C | T |
| TCGA-13-0791 | KIAA0182   | ENST00000253458 | p.A1156V | c.3467C>T | Verified   | gag | gcc | cgg | 2 | C | T |
| TCGA-24-1604 | KIAA0196   | ENST00000318410 | p.R391C  | c.1171C>T | Verified   | AAA | CGC | CTT | 1 | C | T |
| TCGA-13-1499 | KIAA0317   | ENST00000356357 | p.H101Y  | c.301C>T  | Verified   | GTT | CAC | ATC | 1 | C | T |
| TCGA-25-2393 | KIAA0355   | ENST00000299505 | p.P813S  | c.2437C>T | Verified   | GGA | CCT | AGA | 1 | C | T |
| TCGA-24-1847 | KIAA0430   | ENST00000396368 | p.H1530H | c.4590C>T | Unverified | GGC | CAC | AGC | 3 | C | T |
| TCGA-20-1687 | KIAA0467_E | ENST00000372442 | p.Q2299* | c.6895C>T | Unverified | AGC | CAG | CGA | 1 | C | T |
| TCGA-29-1785 | KIAA0556   | ENST00000261588 | p.R107*  | c.319C>T  | Unverified | GGA | CGA | AGA | 1 | C | T |
| TCGA-29-1785 | KIAA0556   | ENST00000261588 | p.R107*  | c.319C>T  | Unverified | GGA | CGA | AGA | 1 | C | T |
| TCGA-04-1638 | KIAA0556   | ENST00000261588 | p.T917M  | c.2750C>T | Unverified | AAC | ACG | GAG | 2 | C | T |
| TCGA-29-1785 | KIAA0556_E | ENST00000261588 | p.R107*  | c.319C>T  | Unverified | GGA | CGA | AGA | 1 | C | T |
| TCGA-29-1785 | KIAA0556_E | ENST00000261588 | p.R107*  | c.319C>T  | Unverified | GGA | CGA | AGA | 1 | C | T |
| TCGA-04-1638 | KIAA0556_E | ENST00000261588 | p.T917M  | c.2750C>T | Unverified | AAC | ACG | GAG | 2 | C | T |
| TCGA-61-2095 | KIAA0701   | ENST00000356828 | p.H78Y   | c.232C>T  | Unverified | ACA | CAT | CCC | 1 | C | T |
| TCGA-25-2401 | KIAA0889   | ENST00000237536 | p.H551H  | c.1653C>T | Verified   | GAG | CAC | GAG | 3 | C | T |
| TCGA-24-1849 | KIAA1024   | ENST00000305428 | p.P58S   | c.172C>T  | Unverified | GAT | CCC | AAT | 1 | C | T |

|              |            |                 |          |           |            |     |     |     |   |   |   |
|--------------|------------|-----------------|----------|-----------|------------|-----|-----|-----|---|---|---|
| TCGA-29-1711 | KIAA1210   | XM_172801.3     | p.T1322T | c.3966C>T | Unverified | ttc | acc | cag | 3 | C | T |
| TCGA-29-1711 | KIAA1210   | XM_172801.3     | p.T1322T | c.3966C>T | Unverified | ttc | acc | cag | 3 | C | T |
| TCGA-13-1488 | KIAA1217   | ENST00000376454 | p.S302F  | c.905C>T  | Verified   | GGA | TCT | ACT | 2 | C | T |
| TCGA-24-1104 | KIAA1217   | ENST00000376454 | p.P300P  | c.900C>T  | Verified   | CGC | CCC | GGA | 3 | C | T |
| TCGA-24-1616 | KIAA1409   | ENST00000256339 | p.S1937L | c.5810C>T | Verified   | GCC | TCG | TCT | 2 | C | T |
| TCGA-20-0990 | KIAA1522   | ENST00000401073 | p.R479W  | c.1435C>T | Unverified | ATT | CGG | AGC | 1 | C | T |
| TCGA-24-1563 | KIAA1614   | ENST00000367588 | p.T597I  | c.1790C>T | Verified   | GAA | ACA | CAC | 2 | C | T |
| TCGA-25-2392 | KIAA1683   | ENST00000359737 | p.A707V  | c.2120C>T | Verified   | CTG | GCC | CAT | 2 | C | T |
| TCGA-13-1488 | KIAA1755   | ENST00000279024 | p.G295G  | c.885C>T  | Verified   | GCA | GGC | ACA | 3 | C | T |
| TCGA-61-2012 | KIAA1755   | ENST00000279024 | p.T182T  | c.546C>T  | Unverified | ATA | ACC | AGC | 3 | C | T |
| TCGA-24-1850 | KIAA1797   | ENST00000380249 | p.G1636G | c.4908C>T | Unverified | ACG | GGC | GTT | 3 | C | T |
| TCGA-24-2289 | KIAA1804   | ENST00000366624 | p.R575*  | c.1723C>T | Unverified | TTT | CGA | CAA | 1 | C | T |
| TCGA-29-1701 | KIAA1958   | ENST00000337530 | p.R528R  | c.1584C>T | Unverified | TCT | CGC | AAC | 3 | C | T |
| TCGA-09-1674 | KIAA1967   | ENST00000389279 | p.P37S   | c.109C>T  | Unverified | CCT | CCT | GTG | 1 | C | T |
| TCGA-20-1686 | KIAA2013   | ENST00000376572 | p.T393M  | c.1178C>T | Unverified | TCG | ACG | CTC | 2 | C | T |
| TCGA-24-2289 | KIAA2018   | ENST00000316407 | p.P1069L | c.3206C>T | Unverified | CTC | CCT | GAT | 2 | C | T |
| TCGA-29-1703 | KIF13A_ENS | ENST00000378814 | p.T1746I | c.5237C>T | Unverified | GGC | ACA | ACC | 2 | C | T |
| TCGA-04-1638 | KIF13B     | ENST00000524189 | p.R641W  | c.1921C>T | Unverified | CTC | CGG | AGA | 1 | C | T |
| TCGA-04-1638 | KIF13B_ENS | ENST00000524189 | p.R641W  | c.1921C>T | Unverified | CTC | CGG | AGA | 1 | C | T |
| TCGA-29-2427 | KIF14      | ENST00000367350 | p.P1552S | c.4654C>T | Verified   | GTG | CCT | TCT | 1 | C | T |
| TCGA-61-1733 | KIF18B     | ENST00000339151 | p.P835P  | c.2505C>T | Unverified | AGT | CCC | CTG | 3 | C | T |
| TCGA-61-1733 | KIF18B     | ENST00000339151 | p.P835P  | c.2505C>T | Unverified | AGT | CCC | CTG | 3 | C | T |
| TCGA-13-1510 | KIF21A     | ENST00000361961 | p.S1261F | c.3782C>T | Unverified | CCT | TCT | TCC | 2 | C | T |
| TCGA-29-1691 | KIF21B     | ENST00000332129 | p.A1303V | c.3908C>T | Unverified | GAT | GCC | ACA | 2 | C | T |
| TCGA-30-1714 | KIF21B     | ENST00000332129 | p.P1246L | c.3737C>T | Unverified | CGG | CCC | CGC | 2 | C | T |
| TCGA-13-1488 | KIF26B     | ENST00000407071 | p.L415L  | c.1245C>T | Verified   | CCG | CTC | TTT | 3 | C | T |
| TCGA-29-1769 | KIF27      | ENST00000297814 | p.R717C  | c.2149C>T | Unverified | GAA | CGC | ATA | 1 | C | T |
| TCGA-24-2280 | KIF3A      | ENST00000378746 | p.A556V  | c.1667C>T | Unverified | GCT | GCA | AAG | 2 | C | T |
| TCGA-24-1847 | KIF5A      | ENST00000455537 | p.T58I   | c.173C>T  | Unverified | ACG | ACT | CAA | 2 | C | T |
| TCGA-13-1498 | KIRREL     | ENST00000392272 | p.T293T  | c.879C>T  | Verified   | CTC | ACC | ATC | 3 | C | T |
| TCGA-24-2267 | KIRREL3    | ENST00000278934 | p.S466S  | c.1398C>T | Verified   | GGC | TCC | GAC | 3 | C | T |
| TCGA-09-1665 | KIT        | ENST00000288135 | p.P31L   | c.92C>T   | Verified   | agt | cca | ggg | 2 | C | T |
| TCGA-09-2056 | KIT        | ENST00000288135 | p.N326N  | c.978C>T  | Verified   | gta | aac | gat | 3 | C | T |
| TCGA-13-0923 | KITLG      | ENST00000228280 | p.H67Y   | c.199C>T  | Verified   | agt | cat | tgt | 1 | C | T |

|              |            |                 |         |           |            |     |     |     |   |   |   |
|--------------|------------|-----------------|---------|-----------|------------|-----|-----|-----|---|---|---|
| TCGA-13-0900 | KLC3       | ENST00000391946 | p.T282M | c.845C>T  | Verified   | CAG | ACG | CTG | 2 | C | T |
| TCGA-09-1674 | KLF13      | ENST00000307145 | p.A246V | c.737C>T  | Unverified | CAC | GCG | CGC | 2 | C | T |
| TCGA-25-2392 | KLF3       | ENST00000261438 | p.P205L | c.614C>T  | Verified   | GAA | CCA | CAG | 2 | C | T |
| TCGA-13-1510 | KLHDC1     | ENST00000359332 | p.H225H | c.675C>T  | Unverified | TTG | CAC | TAT | 3 | C | T |
| TCGA-61-1904 | KLHDC7A    | ENST00000400664 | p.R558C | c.1672C>T | Unverified | AGC | CGC | GTC | 1 | C | T |
| TCGA-04-1342 | KLHL1      | ENST00000377844 | p.L57L  | c.171C>T  | Unverified | CTG | CTC | AAA | 3 | C | T |
| TCGA-13-0916 | KLHL14     | ENST00000359358 | p.R452C | c.1354C>T | Verified   | TGG | CGC | TAT | 1 | C | T |
| TCGA-13-1505 | KLHL25     | ENST00000337975 | p.L39F  | c.115C>T  | Verified   | ACG | CTT | CGC | 1 | C | T |
| TCGA-13-0714 | KLHL29     | ENST00000288548 | p.S141S | c.423C>T  | Verified   | AGG | TCC | GTG | 3 | C | T |
| TCGA-24-1563 | KLHL32     | ENST00000369261 | p.A588V | c.1763C>T | Verified   | TTT | GCT | TCC | 2 | C | T |
| TCGA-61-1737 | KLK1       | ENST00000301420 | p.P234L | c.701C>T  | Unverified | gtc | cct | tgt | 2 | C | T |
| TCGA-13-1507 | KLK12      | ENST00000250351 | p.C161C | c.483C>T  | Verified   | cag | tgc | ctc | 3 | C | T |
| TCGA-61-1998 | KLK2       | ENST00000325321 | p.P237S | c.709C>T  | Verified   | ctg | cct | gaa | 1 | C | T |
| TCGA-04-1649 | KLRAQ1     | ENST00000281394 | p.I550I | c.1650C>T | Unverified | CGC | ATC | CTT | 3 | C | T |
| TCGA-13-1488 | KLRC3      | ENST00000381903 | p.N149N | c.447C>T  | Verified   | AAG | AAC | TCT | 3 | C | T |
| TCGA-23-1114 | KNTC1      | ENST00000333479 | p.T13T  | c.39C>T   | Unverified | gat | acc | gga | 3 | C | T |
| TCGA-61-1738 | KPNA5      | ENST00000368564 | p.A21A  | c.63C>T   | Unverified | aaa | gcc | cta | 3 | C | T |
| TCGA-61-1738 | KPNA5      | ENST00000368564 | p.A21A  | c.63C>T   | Unverified | aaa | gcc | cta | 3 | C | T |
| TCGA-24-2267 | KPTN       | ENST00000338134 | p.L190L | c.570C>T  | Unverified | AAC | CTC | TTC | 3 | C | T |
| TCGA-25-2398 | KREMEN1    | ENST00000327813 | p.S421F | c.1262C>T | Verified   | aaa | tcc | cat | 2 | C | T |
| TCGA-24-2262 | KRT17      | ENST00000311208 | p.L99L  | c.295C>T  | Verified   | TAC | CTG | GAC | 1 | C | T |
| TCGA-29-1766 | KRT17      | ENST00000311208 | p.I300I | c.900C>T  | Unverified | GAG | ATC | TCG | 3 | C | T |
| TCGA-24-1469 | KRT2       | ENST00000309680 | p.G566G | c.1698C>T | Verified   | TCT | GGC | GGT | 3 | C | T |
| TCGA-29-1701 | KRT31      | ENST00000251645 | p.S55S  | c.165C>T  | Unverified | GGT | AGC | GAG | 3 | C | T |
| TCGA-29-1701 | KRT31_ENST | ENST00000251645 | p.S55S  | c.165C>T  | Unverified | GGT | AGC | GAG | 3 | C | T |
| TCGA-13-0919 | KRT6A      | ENST00000330722 | p.A403A | c.1209C>T | Verified   | TGC | GCC | AAC | 3 | C | T |
| TCGA-13-0904 | KRT6C      | ENST00000252250 | p.L434L | c.1300C>T | Verified   | GCC | CTG | CAG | 1 | C | T |
| TCGA-25-2401 | KRT73      | ENST00000305748 | p.A82V  | c.245C>T  | Verified   | TTT | GCT | GGC | 2 | C | T |
| TCGA-13-0760 | KRT74      | ENST00000305620 | p.S430S | c.1290C>T | Verified   | ATG | AGC | CTG | 3 | C | T |
| TCGA-13-0919 | KRT9       | ENST00000246662 | p.R261W | c.781C>T  | Verified   | CTG | CGG | CAG | 1 | C | T |
| TCGA-09-2049 | KRTAP12-4  | ENST00000391618 | p.T4I   | c.11C>T   | Verified   | CAC | ACC | AGC | 2 | C | T |
| TCGA-29-1699 | KRTAP27-1  | ENST00000382835 | p.F151F | c.453C>T  | Unverified | AAT | TTC | GAA | 3 | C | T |
| TCGA-29-1703 | KRTAP4-5   | ENST00000343246 | p.R37C  | c.109C>T  | Unverified | TGC | CGC | CCC | 1 | C | T |
| TCGA-20-1687 | KRTAP5-4   | ENST00000399682 | p.G106G | c.318C>T  | Unverified | GGG | GGC | TCC | 3 | C | T |

|              |            |                 |          |           |            |     |     |     |   |   |   |
|--------------|------------|-----------------|----------|-----------|------------|-----|-----|-----|---|---|---|
| TCGA-10-0930 | KY         | ENST00000423778 | p.R479C  | c.1435C>T | Verified   | GGG | CGC | TGC | 1 | C | T |
| TCGA-10-0930 | KY         | ENST00000423778 | p.R479C  | c.1435C>T | Verified   | GGG | CGC | TGC | 1 | C | T |
| TCGA-20-0990 | L1CAM      | ENST00000370060 | p.S1062F | c.3185C>T | Verified   | GCT | TCC | CTT | 2 | C | T |
| TCGA-29-1777 | LAG3       | ENST00000203629 | p.N250N  | c.750C>T  | Unverified | TTC | AAC | GTC | 3 | C | T |
| TCGA-61-1904 | LAMA1      | ENST00000389658 | p.P424L  | c.1271C>T | Unverified | CAG | CCA | GGT | 2 | C | T |
| TCGA-24-2262 | LAMA1      | ENST00000389658 | p.P1085P | c.3255C>T | Verified   | TTT | CCC | GAC | 3 | C | T |
| TCGA-13-0923 | LAMA4      | ENST00000389463 | p.Q331*  | c.991C>T  | Verified   | ATA | CAA | ATC | 1 | C | T |
| TCGA-13-1498 | LAMA4      | ENST00000389463 | p.H1451H | c.4353C>T | Verified   | TGC | CAC | CTT | 3 | C | T |
| TCGA-23-1021 | LAMB1      | ENST00000222399 | p.A1437V | c.4310C>T | Verified   | GTT | GCA | CAC | 2 | C | T |
| TCGA-30-1856 | LARGE      | ENST00000397394 | p.I554I  | c.1662C>T | Unverified | CAC | ATC | AGC | 3 | C | T |
| TCGA-13-1488 | LARS2      | ENST00000265537 | p.I314I  | c.942C>T  | Verified   | GCC | ATC | TCG | 3 | C | T |
| TCGA-23-2077 | LCE2B      | ENST00000368780 | p.C110C  | c.330C>T  | Verified   | TGC | TGC | TGA | 3 | C | T |
| TCGA-23-1110 | LCE5A      | ENST00000334269 | p.P33L   | c.98C>T   | Verified   | TGT | CCC | CCA | 2 | C | T |
| TCGA-09-2049 | LCK        | ENST00000336890 | p.V434V  | c.1302C>T | Verified   | ATT | GTC | ACC | 3 | C | T |
| TCGA-20-0991 | LCT        | ENST00000264162 | p.S1387F | c.4160C>T | Verified   | GCT | TCT | GCT | 2 | C | T |
| TCGA-10-0930 | LDB3       | ENST00000361373 | p.S241S  | c.723C>T  | Verified   | GAC | AGC | GCC | 3 | C | T |
| TCGA-10-0930 | LDB3       | ENST00000361373 | p.S241S  | c.723C>T  | Verified   | GAC | AGC | GCC | 3 | C | T |
| TCGA-23-1029 | LDHAL6A    | ENST00000280706 | p.V49V   | c.147C>T  | Unverified | CTT | GTC | CTT | 3 | C | T |
| TCGA-13-1507 | LDLR       | ENST00000558518 | p.P848L  | c.2543C>T | Verified   | TAC | CCC | TCG | 2 | C | T |
| TCGA-29-1783 | LDLRAP1    | ENST00000374338 | p.R151W  | c.451C>T  | Unverified | AAG | CGG | AAG | 1 | C | T |
| TCGA-20-1683 | LEPR       | ENST00000371060 | p.T85I   | c.254C>T  | Unverified | AAA | ACA | ACT | 2 | C | T |
| TCGA-61-1733 | LEPR       | ENST00000371060 | p.S60L   | c.179C>T  | Unverified | AAT | TCG | AAT | 2 | C | T |
| TCGA-61-1733 | LEPR       | ENST00000371060 | p.S60L   | c.179C>T  | Unverified | AAT | TCG | AAT | 2 | C | T |
| TCGA-20-1683 | LEPR_ENSTC | ENST00000344610 | p.T85I   | c.254C>T  | Unverified | AAA | ACA | ACT | 2 | C | T |
| TCGA-61-1733 | LEPR_ENSTC | ENST00000344610 | p.S60L   | c.179C>T  | Unverified | AAT | TCG | AAT | 2 | C | T |
| TCGA-61-1733 | LEPR_ENSTC | ENST00000344610 | p.S60L   | c.179C>T  | Unverified | AAT | TCG | AAT | 2 | C | T |
| TCGA-20-1683 | LEPR_ENSTC | ENST00000349533 | p.T85I   | c.254C>T  | Unverified | AAA | ACA | ACT | 2 | C | T |
| TCGA-61-1733 | LEPR_ENSTC | ENST00000349533 | p.S60L   | c.179C>T  | Unverified | AAT | TCG | AAT | 2 | C | T |
| TCGA-61-1733 | LEPR_ENSTC | ENST00000349533 | p.S60L   | c.179C>T  | Unverified | AAT | TCG | AAT | 2 | C | T |
| TCGA-61-1998 | LGALS13    | ENST00000221797 | p.D79D   | c.237C>T  | Verified   | ACA | GAC | TAC | 3 | C | T |
| TCGA-23-1021 | LHX1       | ENST00000254457 | p.H85H   | c.255C>T  | Verified   | TTT | CAC | CTG | 3 | C | T |
| TCGA-29-1775 | LHX8       | ENST00000294638 | p.H355Y  | c.1063C>T | Unverified | AGT | CAT | ACC | 1 | C | T |
| TCGA-25-2401 | LIG3       | NM_002311.2     | p.A128V  | c.383C>T  | Verified   | ggc | gcc | tca | 2 | C | T |
| TCGA-24-2288 | LIG4       | ENST00000405925 | p.P492L  | c.1475C>T | Unverified | ccc | cct | cct | 2 | C | T |

|              |            |                 |          |           |            |     |     |     |   |   |   |
|--------------|------------|-----------------|----------|-----------|------------|-----|-----|-----|---|---|---|
| TCGA-09-2044 | LILRA1     | ENST00000251372 | p.P113S  | c.337C>T  | Verified   | GAC | CCC | CTG | 1 | C | T |
| TCGA-24-1844 | LILRA4     | ENST00000291759 | p.Y376Y  | c.1128C>T | Unverified | AAG | TAC | CAG | 3 | C | T |
| TCGA-23-1111 | LILRB1     | ENST00000396331 | p.R179R  | c.537C>T  | Unverified | TCC | CGC | GCC | 3 | C | T |
| TCGA-29-1691 | LILRB2     | ENST00000314446 | p.L243F  | c.727C>T  | Unverified | ACC | CTC | CAG | 1 | C | T |
| TCGA-13-0760 | LIMA1      | ENST00000341247 | p.R9W    | c.25C>T   | Verified   | AGA | CGG | CAA | 1 | C | T |
| TCGA-25-2392 | LIMK2      | ENST00000331728 | p.L244L  | c.730C>T  | Verified   | CGC | CTG | GAC | 1 | C | T |
| TCGA-23-2078 | LIN28B     | ENST00000345080 | p.P146L  | c.437C>T  | Unverified | CCT | CCT | CAG | 2 | C | T |
| TCGA-61-1900 | LIN7A      | ENST00000552864 | p.R204*  | c.610C>T  | Unverified | CTA | CGA | ACA | 1 | C | T |
| TCGA-13-0792 | LIPK       | ENST00000404190 | p.Y168Y  | c.504C>T  | Verified   | TAC | TAC | GTG | 3 | C | T |
| TCGA-13-0795 | LLOXNC01-2 | ENST00000218249 | p.T70M   | c.209C>T  | Verified   | gat | acg | tcg | 2 | C | T |
| TCGA-61-1915 | LLOXNC01-2 | ENST00000218249 | p.Y11Y   | c.33C>T   | Unverified | gcc | tac | gac | 3 | C | T |
| TCGA-29-1701 | LLPH       | ENST00000266604 | p.P23S   | c.67C>T   | Unverified | GCC | CCA | AAG | 1 | C | T |
| TCGA-13-0884 | LMBRD1     | ENST00000370577 | p.S461F  | c.1382C>T | Verified   | CTT | TCT | GTG | 2 | C | T |
| TCGA-29-1695 | LMX1A      | ENST00000367893 | p.R197C  | c.589C>T  | Unverified | AAA | CGT | CCG | 1 | C | T |
| TCGA-13-0884 | LNx2       | ENST00000316334 | p.P227S  | c.679C>T  | Verified   | tta | cca | gaa | 1 | C | T |
| TCGA-04-1331 | LOC114984  | ENST00000396958 | p.N128N  | c.384C>T  | Unverified | GAG | AAC | TTT | 3 | C | T |
| TCGA-13-1488 | LOC168850  | ENST00000393313 | p.H310Y  | c.928C>T  | Verified   | GTT | CAT | AGA | 1 | C | T |
| TCGA-24-1844 | LOC223075  | ENST00000319386 | p.I495I  | c.1485C>T | Unverified | TGT | ATC | CCC | 3 | C | T |
| TCGA-24-1435 | LOC257106  | ENST00000368016 | p.V286V  | c.858C>T  | Verified   | AAG | GTC | AGG | 3 | C | T |
| TCGA-29-1691 | LOC340578  | ENST00000360028 | p.N107N  | c.321C>T  | Unverified | CTG | AAC | GCC | 3 | C | T |
| TCGA-23-1111 | LOC389900  | XM_372261.2     | p.D416D  | c.1248C>T | Unverified | ctg | gac | cat | 3 | C | T |
| TCGA-13-0760 | LOC51059   | ENST00000395297 | p.I398I  | c.1194C>T | Verified   | GAC | ATC | GAC | 3 | C | T |
| TCGA-61-1737 | LOC65121   | ENST00000332296 | p.H324Y  | c.970C>T  | Unverified | AAG | CAT | CTG | 1 | C | T |
| TCGA-13-0883 | LOC652153  | ENST00000316490 | p.T2472M | c.7415C>T | Unverified | CGC | ACG | GAG | 2 | C | T |
| TCGA-13-0883 | LOC652737  | ENST00000309900 | p.T151M  | c.452C>T  | Unverified | CGC | ACG | GAG | 2 | C | T |
| TCGA-13-0887 | LOC91807   | ENST00000394809 | p.F673F  | c.2019C>T | Verified   | AAC | TTC | GGC | 3 | C | T |
| TCGA-24-1844 | LONP1      | ENST00000360614 | p.T190M  | c.569C>T  | Unverified | GGG | ACG | TTT | 2 | C | T |
| TCGA-29-1695 | LONP1      | ENST00000360614 | p.A341A  | c.1023C>T | Unverified | GGG | GCC | GAG | 3 | C | T |
| TCGA-24-1474 | LOXL4      | ENST00000260702 | p.I694I  | c.2082C>T | Verified   | tat | atc | ttc | 3 | C | T |
| TCGA-13-0755 | LPA        | ENST00000316300 | p.T331M  | c.992C>T  | Verified   | CTG | ACG | CAA | 2 | C | T |
| TCGA-24-1844 | LPA        | ENST00000316300 | p.T1349M | c.4046C>T | Unverified | CTG | ACG | CAA | 2 | C | T |
| TCGA-29-1690 | LPA        | ENST00000316300 | p.T1739M | c.5216C>T | Unverified | GGG | ACG | CCA | 2 | C | T |
| TCGA-30-1714 | LPA        | ENST00000316300 | p.A912V  | c.2735C>T | Unverified | GTC | GCG | CCT | 2 | C | T |
| TCGA-24-2035 | LPAR6      | ENST00000345941 | p.S92F   | c.275C>T  | Verified   | ATT | TCT | GTG | 2 | C | T |

|              |            |                 |          |            |            |     |     |     |   |   |   |
|--------------|------------|-----------------|----------|------------|------------|-----|-----|-----|---|---|---|
| TCGA-13-1507 | LPCAT1     | ENST00000283415 | p.A507V  | c.1520C>T  | Verified   | CCT | GCG | CCA | 2 | C | T |
| TCGA-20-0990 | LPIN3      | ENST00000373257 | p.N788N  | c.2364C>T  | Verified   | GTC | AAC | CCC | 3 | C | T |
| TCGA-24-1616 | LPPR4      | ENST00000370185 | p.Y661Y  | c.1983C>T  | Verified   | ACT | TAC | GAG | 3 | C | T |
| TCGA-61-1913 | LRCH2      | NM_020871.2     | p.N279N  | c.837C>T   | Unverified | gat | aac | aat | 3 | C | T |
| TCGA-61-1913 | LRCH2_ENST | ENST00000317135 | p.N279N  | c.837C>T   | Unverified | GAT | AAC | AAT | 3 | C | T |
| TCGA-24-1463 | LRFN2      | ENST00000338305 | p.T788M  | c.2363C>T  | Unverified | AGC | ACG | GTC | 2 | C | T |
| TCGA-29-1695 | LRFN3      | ENST00000246529 | p.C515C  | c.1545C>T  | Unverified | GGC | TGC | GCC | 3 | C | T |
| TCGA-61-2012 | LRFN5      | ENST00000298119 | p.T691M  | c.2072C>T  | Verified   | CCC | ACG | TCT | 2 | C | T |
| TCGA-09-2051 | LRGUK      | ENST00000285928 | p.I328I  | c.984C>T   | Unverified | CCC | ATC | CTT | 3 | C | T |
| TCGA-13-0760 | LRP1       | ENST00000243077 | p.R1423C | c.4267C>T  | Verified   | GGG | CGC | CGC | 1 | C | T |
| TCGA-30-1857 | LRP1       | ENST00000243077 | p.R2135* | c.6403C>T  | Unverified | CTG | CGA | ACC | 1 | C | T |
| TCGA-61-1740 | LRP1       | ENST00000243077 | p.C3439C | c.10317C>T | Unverified | AAC | TGC | GGA | 3 | C | T |
| TCGA-09-2051 | LRP5       | ENST00000294304 | p.D736D  | c.2208C>T  | Unverified | GCC | GAC | ACT | 3 | C | T |
| TCGA-29-1781 | LRRC1      | ENST00000370888 | p.R497W  | c.1489C>T  | Unverified | TTA | CGG | AAT | 1 | C | T |
| TCGA-24-1464 | LRRC17     | ENST00000339431 | p.N298N  | c.894C>T   | Verified   | TTA | AAC | CTC | 3 | C | T |
| TCGA-09-2051 | LRRC36     | ENST00000329956 | p.P325S  | c.973C>T   | Unverified | TTA | CCT | TCA | 1 | C | T |
| TCGA-23-1022 | LRRC39     | ENST00000370137 | p.F275F  | c.825C>T   | Verified   | AAC | TTC | AGA | 3 | C | T |
| TCGA-24-2290 | LRRC41     | ENST00000343304 | p.H766Y  | c.2296C>T  | Verified   | GGT | CAC | CTG | 1 | C | T |
| TCGA-24-2290 | LRRC41     | ENST00000343304 | p.H766Y  | c.2296C>T  | Verified   | GGT | CAC | CTG | 1 | C | T |
| TCGA-13-0886 | LRRC8C     | ENST00000370454 | p.P746L  | c.2237C>T  | Verified   | TCA | CCG | AAA | 2 | C | T |
| TCGA-13-0795 | LRRFIP2    | ENST00000336686 | p.D390D  | c.1170C>T  | Verified   | TTA | GAC | AAT | 3 | C | T |
| TCGA-09-2056 | LRRIQ1     | ENST00000256007 | p.R329*  | c.985C>T   | Verified   | ATA | CGA | CAA | 1 | C | T |
| TCGA-23-1032 | LRRN3      | ENST00000308478 | p.I241I  | c.723C>T   | Verified   | AGC | ATC | TCT | 3 | C | T |
| TCGA-61-1907 | LRRTM4     | ENST00000409088 | p.R181W  | c.541C>T   | Unverified | TGT | CGG | AAT | 1 | C | T |
| TCGA-61-1907 | LRRTM4_EN  | ENST00000409093 | p.R181W  | c.541C>T   | Unverified | TGT | CGG | AAT | 1 | C | T |
| TCGA-13-0923 | LRTM2      | ENST00000299194 | p.Y335Y  | c.1005C>T  | Unverified | ATC | TAC | GCC | 3 | C | T |
| TCGA-13-1481 | LSMD1      | ENST00000333775 | p.T36I   | c.107C>T   | Verified   | GGA | ACT | GCA | 2 | C | T |
| TCGA-61-2109 | LTBP1      | NM_206943.1     | p.C943C  | c.2829C>T  | Unverified | att | tgc | cca | 3 | C | T |
| TCGA-23-1116 | LTBR       | ENST00000228918 | p.H349Y  | c.1045C>T  | Unverified | ATT | CAT | GTC | 1 | C | T |
| TCGA-13-1497 | LTN1       | ENST00000361371 | p.T96I   | c.287C>T   | Verified   | GAC | ACA | GAA | 2 | C | T |
| TCGA-29-1690 | LUC7L3     | ENST00000505658 | p.R261W  | c.781C>T   | Unverified | GAA | CGG | GAG | 1 | C | T |
| TCGA-29-1701 | LY6G6F     | ENST00000375832 | p.P296P  | c.888C>T   | Unverified | AAG | CCC | AGG | 3 | C | T |
| TCGA-13-0903 | LYST       | ENST00000389793 | p.P837S  | c.2509C>T  | Verified   | GTT | CCA | GAT | 1 | C | T |
| TCGA-61-1904 | LZTR1      | ENST00000215739 | p.D185D  | c.555C>T   | Unverified | AGT | GAC | AAG | 3 | C | T |

|              |           |                 |          |           |            |     |     |     |   |   |   |
|--------------|-----------|-----------------|----------|-----------|------------|-----|-----|-----|---|---|---|
| TCGA-13-0884 | MADD      | ENST00000311027 | p.A1421V | c.4262C>T | Verified   | CTG | GCG | AAC | 2 | C | T |
| TCGA-24-0979 | MALT1     | ENST00000345724 | p.F746F  | c.2238C>T | Verified   | CCA | TTC | CAT | 3 | C | T |
| TCGA-25-1326 | MALT1     | ENST00000345724 | p.L348L  | c.1044C>T | Verified   | AAG | CTC | AAA | 3 | C | T |
| TCGA-24-1469 | MAML2     | ENST00000524717 | p.L1148F | c.3442C>T | Unverified | aat | ctt | gat | 1 | C | T |
| TCGA-04-1336 | MAMSTR    | ENST00000356751 | p.S297F  | c.890C>T  | Verified   | TTA | TCT | GAC | 2 | C | T |
| TCGA-23-1122 | MAN1A2    | ENST00000356554 | p.D59D   | c.177C>T  | Unverified | CCA | GAC | TCT | 3 | C | T |
| TCGA-24-1849 | MAN2A1    | ENST00000261483 | p.S551L  | c.1652C>T | Unverified | TCA | TCA | CTT | 2 | C | T |
| TCGA-13-1498 | MAP1A     | ENST00000300231 | p.S2229L | c.6686C>T | Verified   | TCC | TCA | CTG | 2 | C | T |
| TCGA-24-2024 | MAP3K12   | ENST00000267079 | p.S805L  | c.2414C>T | Verified   | CCT | TCA | GAG | 2 | C | T |
| TCGA-09-1665 | MAP3K5    | ENST00000359015 | p.P834S  | c.2500C>T | Verified   | AAC | CCC | TGT | 1 | C | T |
| TCGA-24-2288 | MAP4K1_EN | ENST00000396857 | p.P811L  | c.2432C>T | Unverified | GAT | CCT | ACT | 2 | C | T |
| TCGA-61-1904 | MAP4K4    | NM_145686       | p.P976S  | c.2926C>T | Unverified | gat | cct | acc | 1 | C | T |
| TCGA-13-0885 | MAP7D2    | ENST00000379651 | p.P722S  | c.2164C>T | Verified   | AGT | CCT | GGC | 1 | C | T |
| TCGA-61-1998 | MAPK8     | ENST00000374182 | p.L198F  | c.592C>T  | Verified   | atc | ctt | ggc | 1 | C | T |
| TCGA-30-1891 | MAPRE3    | ENST00000233121 | p.I251I  | c.753C>T  | Unverified | GGC | ATC | ATT | 3 | C | T |
| TCGA-24-0975 | MAPT      | ENST00000262410 | p.D704D  | c.2112C>T | Unverified | ACA | GAC | CAC | 3 | C | T |
| TCGA-24-1470 | MARCKSL1  | ENST00000329421 | p.Q126*  | c.376C>T  | Verified   | GAG | CAG | GAG | 1 | C | T |
| TCGA-23-1118 | MARS      | ENST00000262027 | p.A657V  | c.1970C>T | Verified   | aga | gct | ggg | 2 | C | T |
| TCGA-30-1714 | MAST1     | ENST00000251472 | p.R117R  | c.351C>T  | Unverified | GAG | CGC | CTT | 3 | C | T |
| TCGA-30-1714 | MAST1_ENS | ENST00000251472 | p.R117R  | c.351C>T  | Unverified | GAG | CGC | CTT | 3 | C | T |
| TCGA-13-0807 | MAST2     | NM_015112       | p.P730L  | c.2189C>T | Verified   | act | ccg | gag | 2 | C | T |
| TCGA-13-0807 | MAST2_ENS | ENST00000361297 | p.P730L  | c.2189C>T | Verified   | ACT | CCG | GAG | 2 | C | T |
| TCGA-20-0991 | MAST4_ENS | ENST00000403625 | p.R199C  | c.595C>T  | Unverified | ATG | CGC | AGC | 1 | C | T |
| TCGA-04-1651 | MASTL     | ENST00000375946 | p.A237V  | c.710C>T  | Unverified | TCA | GCC | TGT | 2 | C | T |
| TCGA-04-1651 | MASTL     | ENST00000375946 | p.A237V  | c.710C>T  | Unverified | TCA | GCC | TGT | 2 | C | T |
| TCGA-24-1850 | MAT2A     | ENST00000306434 | p.R177C  | c.529C>T  | Unverified | TTA | CGC | CCT | 1 | C | T |
| TCGA-24-1474 | MATN4     | ENST00000372756 | p.R182C  | c.544C>T  | Unverified | CTG | CGC | GCC | 1 | C | T |
| TCGA-23-2078 | MATN4     | ENST00000372756 | p.F48F   | c.144C>T  | Unverified | CCT | TTC | GAG | 3 | C | T |
| TCGA-29-1696 | MAVS      | ENST00000428216 | p.D53D   | c.159C>T  | Unverified | CGG | GAC | ACC | 3 | C | T |
| TCGA-29-1696 | MAVS      | ENST00000428216 | p.D53D   | c.159C>T  | Unverified | CGG | GAC | ACC | 3 | C | T |
| TCGA-23-1114 | MBD5      | ENST00000407073 | p.P1080L | c.3239C>T | Unverified | GGC | CCA | GGT | 2 | C | T |
| TCGA-13-1507 | MC2R      | ENST00000399821 | p.C293C  | c.879C>T  | Verified   | TTC | TGC | AGC | 3 | C | T |
| TCGA-61-1914 | MC3R      | NM_019888.2     | p.R344C  | c.1030C>T | Unverified | ttg | cgc | aac | 1 | C | T |
| TCGA-20-1687 | MC3R      | NM_019888.2     | p.V75V   | c.225C>T  | Unverified | cag | gtc | ttc | 3 | C | T |

|              |           |                     |          |            |            |     |     |     |   |   |   |
|--------------|-----------|---------------------|----------|------------|------------|-----|-----|-----|---|---|---|
| TCGA-24-2024 | MC3R      | NM_019888.2         | p.N103N  | c.309C>T   | Verified   | agg | aac | ggc | 3 | C | T |
| TCGA-09-2049 | MC5R      | ENST00000324750     | p.T171M  | c.512C>T   | Verified   | TGC | ACG | GGC | 2 | C | T |
| TCGA-10-0930 | MC5R      | ENST00000324750     | p.I219I  | c.657C>T   | Verified   | CGG | ATC | GCG | 3 | C | T |
| TCGA-10-0930 | MC5R      | ENST00000324750     | p.I219I  | c.657C>T   | Verified   | CGG | ATC | GCG | 3 | C | T |
| TCGA-25-1318 | MCCC1     | ENST00000265594     | p.L515L  | c.1545C>T  | Verified   | GGT | CTC | ATC | 3 | C | T |
| TCGA-25-1318 | MCCC1     | ENST00000265594     | p.L515L  | c.1545C>T  | Verified   | GGT | CTC | ATC | 3 | C | T |
| TCGA-13-0906 | MCM3      | ENST00000229854     | p.A509V  | c.1526C>T  | Verified   | aga | gca | cct | 2 | C | T |
| TCGA-24-2024 | MDN1      | ENST00000369393     | p.Q5005* | c.15013C>T | Verified   | TTC | CAG | CCC | 1 | C | T |
| TCGA-29-1766 | MDN1      | ENST00000369393     | p.H91Y   | c.271C>T   | Unverified | CTG | CAT | GAA | 1 | C | T |
| TCGA-13-0903 | MECR      | ENST00000263702     | p.P292P  | c.876C>T   | Verified   | CAG | CCC | GTC | 3 | C | T |
| TCGA-25-2393 | MED12     | ENST00000374080     | p.P1734S | c.5200C>T  | Unverified | CGG | CCC | CGC | 1 | C | T |
| TCGA-13-0923 | MED13L    | ENST00000281928     | p.S1604F | c.4811C>T  | Verified   | tct | tct | tca | 2 | C | T |
| TCGA-24-1850 | MED22     | ENST00000344469     | p.D121D  | c.363C>T   | Unverified | CGA | GAC | GAG | 3 | C | T |
| TCGA-04-1338 | MED24     | NM_014815.2         | p.S601F  | c.1802C>T  | Verified   | gag | tcc | atc | 2 | C | T |
| TCGA-29-1785 | MED25     | ENST00000312865     | p.I114I  | c.342C>T   | Unverified | CTC | ATC | GCG | 3 | C | T |
| TCGA-29-1785 | MED25     | ENST00000312865     | p.I114I  | c.342C>T   | Unverified | CTC | ATC | GCG | 3 | C | T |
| TCGA-29-1785 | MED25_ENS | ENST00000312881     | p.I114I  | c.342C>T   | Unverified | CTC | ATC | GCG | 3 | C | T |
| TCGA-29-1785 | MED25_ENS | ENST00000312881     | p.I114I  | c.342C>T   | Unverified | CTC | ATC | GCG | 3 | C | T |
| TCGA-24-1843 | MED29     | ENST00000315588     | p.P56S   | c.166C>T   | Unverified | CCG | CCA | GCA | 1 | C | T |
| TCGA-24-1844 | MEGF8     | ENST00000251268_v61 | p.P2048S | c.6142C>T  | Unverified | ATG | CCG | GTG | 1 | C | T |
| TCGA-24-1844 | MEGF8_ENS | ENST00000334370     | p.P1981S | c.5941C>T  | Unverified | ATG | CCG | GTG | 1 | C | T |
| TCGA-23-1118 | MELK      | ENST00000298048     | p.H514Y  | c.1540C>T  | Verified   | GCA | CAT | ATG | 1 | C | T |
| TCGA-13-0755 | MELK      | ENST00000298048     | p.P346L  | c.1037C>T  | Verified   | ACC | CCA | TTC | 2 | C | T |
| TCGA-29-1769 | MEPCE     | ENST00000310512     | p.R170C  | c.508C>T   | Unverified | AGG | CGC | AGG | 1 | C | T |
| TCGA-04-1362 | MEST      | ENST00000223215     | p.Q123*  | c.367C>T   | Verified   | GAG | CAG | GCC | 1 | C | T |
| TCGA-13-0761 | MEST      | ENST00000223215     | p.L157F  | c.469C>T   | Verified   | CTT | CTC | TAC | 1 | C | T |
| TCGA-13-0761 | MEST      | ENST00000223215     | p.L157F  | c.469C>T   | Verified   | CTT | CTC | TAC | 1 | C | T |
| TCGA-29-1703 | METTL11A  | ENST00000372480     | p.I163I  | c.489C>T   | Unverified | ATC | ATC | GTC | 3 | C | T |
| TCGA-29-1699 | METTL13   | ENST00000361735     | p.L666L  | c.1996C>T  | Unverified | CTC | CTA | GAA | 1 | C | T |
| TCGA-04-1342 | METTL16   | NM_024086.2         | p.A442A  | c.1326C>T  | Verified   | gct | gcc | gct | 3 | C | T |
| TCGA-13-1488 | METTL19   | ENST00000285635     | p.P15L   | c.44C>T    | Verified   | ACA | CCC | AAT | 2 | C | T |
| TCGA-04-1347 | MFN2      | ENST00000235329     | p.R564W  | c.1690C>T  | Verified   | CGT | CGG | GCC | 1 | C | T |
| TCGA-23-1124 | MGAT1     | ENST00000333055     | p.R187C  | c.559C>T   | Verified   | GCG | CGC | CAC | 1 | C | T |
| TCGA-25-2400 | MGAT1     | ENST00000333055     | p.P227L  | c.680C>T   | Unverified | TAT | CCG | CTG | 2 | C | T |



|              |            |                 |          |           |            |     |     |     |   |   |   |
|--------------|------------|-----------------|----------|-----------|------------|-----|-----|-----|---|---|---|
| TCGA-29-1776 | MGAT1      | ENST00000333055 | p.D60D   | c.180C>T  | Unverified | CAA | GAC | GCC | 3 | C | T |
| TCGA-29-2427 | MGAT4C     | ENST00000332156 | p.F73F   | c.219C>T  | Verified   | ACT | TTC | AAG | 3 | C | T |
| TCGA-09-2050 | MGAT5      | ENST00000281923 | p.Q12*   | c.34C>T   | Verified   | TCT | CAG | AAG | 1 | C | T |
| TCGA-23-1124 | MGC42105   | ENST00000326035 | p.F337F  | c.1011C>T | Verified   | CCT | TTC | CAA | 3 | C | T |
| TCGA-61-2102 | MGMT       | NM_002412.1     | p.I76I   | c.228C>T  | Verified   | gct | atc | gaa | 3 | C | T |
| TCGA-13-0760 | MGP        | ENST00000539261 | p.A91V   | c.272C>T  | Verified   | GCT | GCC | TAT | 2 | C | T |
| TCGA-25-2398 | MGRN1      | ENST00000262370 | p.S233F  | c.698C>T  | Verified   | TTC | TCT | GTG | 2 | C | T |
| TCGA-24-1846 | MIA3       | ENST00000344922 | p.H880Y  | c.2638C>T | Unverified | GAC | CAT | GAG | 1 | C | T |
| TCGA-25-1313 | MIA3       | ENST00000344922 | p.G1883G | c.5649C>T | Verified   | TCA | GGC | TCT | 3 | C | T |
| TCGA-23-2077 | MICAL2     | ENST00000256194 | p.I489I  | c.1467C>T | Unverified | TAT | ATC | ACT | 3 | C | T |
| TCGA-13-1501 | MID2       | NM_012216.2     | p.R85C   | c.253C>T  | Verified   | gat | cgc | ttc | 1 | C | T |
| TCGA-13-1501 | MID2       | NM_012216.2     | p.R85C   | c.253C>T  | Verified   | gat | cgc | ttc | 1 | C | T |
| TCGA-30-1714 | MIDN       | ENST00000300952 | p.S442S  | c.1326C>T | Unverified | GCC | TCC | GGC | 3 | C | T |
| TCGA-29-1698 | MIER2      | ENST00000264819 | p.Q43*   | c.127C>T  | Unverified | CAT | CAG | TTC | 1 | C | T |
| TCGA-13-1507 | MIIP       | ENST00000235332 | p.H280H  | c.840C>T  | Verified   | GCG | CAC | GTC | 3 | C | T |
| TCGA-24-1846 | MINK1_ENS' | ENST00000347992 | p.L1220L | c.3658C>T | Unverified | GTG | CTG | CAG | 1 | C | T |
| TCGA-24-1846 | MINK1_ENS' | ENST00000355280 | p.L1249L | c.3745C>T | Unverified | GTG | CTG | CAG | 1 | C | T |
| TCGA-13-0795 | MKI67      | ENST00000368654 | p.T1655I | c.4964C>T | Verified   | CAG | ACA | TCA | 2 | C | T |
| TCGA-23-1032 | MKRN3      | ENST00000314520 | p.P76S   | c.226C>T  | Verified   | GCC | CCA | GCC | 1 | C | T |
| TCGA-61-1900 | MKRN3      | ENST00000314520 | p.A75A   | c.225C>T  | Unverified | CCT | GCC | CCA | 3 | C | T |
| TCGA-25-2400 | MKS1       | ENST00000393119 | p.Q548*  | c.1642C>T | Verified   | CCG | CAG | GAC | 1 | C | T |
| TCGA-04-1336 | MLIP       | ENST00000274897 | p.S404L  | c.1211C>T | Verified   | CTC | TCA | CAT | 2 | C | T |
| TCGA-24-2280 | MLIP       | ENST00000274897 | p.S418S  | c.1254C>T | Verified   | CTG | TCC | TTC | 3 | C | T |
| TCGA-24-1847 | MLL4       | ENST00000222270 | p.R152W  | c.454C>T  | Unverified | GGT | CGG | GGT | 1 | C | T |
| TCGA-24-1431 | MLNR       | ENST00000218721 | p.P280L  | c.839C>T  | Unverified | CGG | CCG | CTG | 2 | C | T |
| TCGA-29-1702 | MMEL1      | ENST00000288709 | p.I579I  | c.1737C>T | Unverified | GGG | ATC | CTC | 3 | C | T |
| TCGA-13-0904 | MMP15      | ENST00000219271 | p.P474S  | c.1420C>T | Unverified | gag | ccc | aca | 1 | C | T |
| TCGA-29-1761 | MMP16      | ENST00000286614 | p.P336P  | c.1008C>T | Unverified | tat | ccc | gga | 3 | C | T |
| TCGA-09-0369 | MMP2       | ENST00000219070 | p.A366A  | c.1098C>T | Unverified | AGC | GCC | GGC | 3 | C | T |
| TCGA-09-0369 | MMP2       | ENST00000219070 | p.A366A  | c.1098C>T | Unverified | AGC | GCC | GGC | 3 | C | T |
| TCGA-20-0991 | MMP21      | ENST00000368808 | p.T297M  | c.890C>T  | Verified   | agg | acg | gga | 2 | C | T |
| TCGA-29-1775 | MMP27      | ENST00000260229 | p.A482V  | c.1445C>T | Unverified | AAA | GCA | CAT | 2 | C | T |
| TCGA-24-1845 | MMP27      | ENST00000260229 | p.A232A  | c.696C>T  | Unverified | ACA | GCC | TTG | 3 | C | T |
| TCGA-23-1116 | MMP8       | ENST00000236826 | p.D378D  | c.1134C>T | Unverified | att | gac | gca | 3 | C | T |

|              |            |                     |           |            |            |     |     |     |   |   |   |
|--------------|------------|---------------------|-----------|------------|------------|-----|-----|-----|---|---|---|
| TCGA-13-0924 | MOG        | ENST00000376917     | p.R233*   | c.697C>T   | Verified   | CAT | CGA | AGA | 1 | C | T |
| TCGA-24-1474 | MORC2      | ENST00000215862     | p.R674W   | c.2020C>T  | Verified   | AGT | CGG | AAG | 1 | C | T |
| TCGA-04-1542 | MOV10      | ENST00000357443     | p.S631L   | c.1892C>T  | Verified   | GTC | TCG | GCC | 2 | C | T |
| TCGA-61-1737 | MPL        | ENST00000372470     | p.P70L    | c.209C>T   | Unverified | tac | ccg | cgg | 2 | C | T |
| TCGA-13-1481 | MPO        | ENST00000225275     | p.L463L   | c.1387C>T  | Verified   | TAC | CTG | CCC | 1 | C | T |
| TCGA-29-1691 | MPP3       | ENST00000398389     | p.T513M   | c.1538C>T  | Unverified | AAA | ACG | CCA | 2 | C | T |
| TCGA-29-2427 | MPP4_ENST  | ENST00000409474     | p.P320L   | c.959C>T   | Verified   | CAG | CCG | TAC | 2 | C | T |
| TCGA-25-2391 | MRPL38     | ENST00000309352     | p.A208V   | c.623C>T   | Unverified | GAG | GCA | GAA | 2 | C | T |
| TCGA-13-1481 | MRPS5      | ENST00000272418     | p.D407D   | c.1221C>T  | Verified   | CTG | GAC | TGG | 3 | C | T |
| TCGA-13-0760 | MS4A4E     | ENST00000427611     | p.P20L    | c.59C>T    | Verified   | AAC | CCA | AAG | 2 | C | T |
| TCGA-29-1775 | MSH2       | ENST00000233146     | p.A917V   | c.2750C>T  | Unverified | ata | gca | aag | 2 | C | T |
| TCGA-13-0885 | MSL3       | ENST00000312196     | p.L253F   | c.757C>T   | Verified   | GAC | CTT | TGT | 1 | C | T |
| TCGA-04-1361 | MST4       | ENST00000394334     | p.L381L   | c.1143C>T  | Verified   | gaa | ctc | gag | 3 | C | T |
| TCGA-04-1361 | MST4       | ENST00000394334     | p.L381L   | c.1143C>T  | Verified   | gaa | ctc | gag | 3 | C | T |
| TCGA-29-1693 | MT-ATP6    | ENST00000361899     | p.L222L   | c.664C>T   | Unverified | TAC | CTG | CAC | 1 | C | T |
| TCGA-61-1895 | MT-ATP6    | ENST00000361899     | p.L5L     | c.13C>T    | Unverified | AAT | CTG | TTC | 1 | C | T |
| TCGA-61-1900 | MT-ATP6    | ENST00000361899     | p.S99F    | c.296C>T   | Unverified | CTA | TCT | ATA | 2 | C | T |
| TCGA-29-1693 | MT-ATP6_EI | ENST00000361899_v68 | p.L222L   | c.664C>T   | Unverified | TAC | CTG | CAC | 1 | C | T |
| TCGA-61-1895 | MT-ATP6_EI | ENST00000361899_v68 | p.L5L     | c.13C>T    | Unverified | AAT | CTG | TTC | 1 | C | T |
| TCGA-61-1900 | MT-ATP6_EI | ENST00000361899_v68 | p.S99F    | c.296C>T   | Unverified | CTA | TCT | ATA | 2 | C | T |
| TCGA-61-1913 | MT-ATP8    | ENST00000361851     | p.L22L    | c.66C>T    | Unverified | TTC | CTC | ATC | 3 | C | T |
| TCGA-04-1342 | MTF1       | ENST00000373036     | p.G178G   | c.534C>T   | Unverified | TGT | GGC | AAA | 3 | C | T |
| TCGA-61-1738 | MTHFD2_EN  | ENST00000394053     | p.R54W    | c.160C>T   | Unverified | GTG | CGG | CAG | 1 | C | T |
| TCGA-61-1738 | MTHFD2_EN  | ENST00000394053     | p.R54W    | c.160C>T   | Unverified | GTG | CGG | CAG | 1 | C | T |
| TCGA-23-2078 | MTM1       | ENST00000370396     | p.P226S   | c.676C>T   | Verified   | att | cca | gtg | 1 | C | T |
| TCGA-13-0791 | MTMR1      | ENST00000370390     | p.T301M   | c.902C>T   | Verified   | gca | acg | att | 2 | C | T |
| TCGA-61-1907 | MTNR1B     | ENST00000257068     | p.D104D   | c.312C>T   | Unverified | TAT | GAC | GGC | 3 | C | T |
| TCGA-61-1733 | MTO1       | ENST00000370300     | p.R328C   | c.982C>T   | Unverified | AAC | CGT | CTA | 1 | C | T |
| TCGA-61-1733 | MTO1       | ENST00000370300     | p.R328C   | c.982C>T   | Unverified | AAC | CGT | CTA | 1 | C | T |
| TCGA-23-1021 | MTUS1      | ENST00000262102     | p.Y243Y   | c.729C>T   | Verified   | ACT | TAC | ACA | 3 | C | T |
| TCGA-29-1703 | MUC16      | ENST00000397910     | p.T5962T  | c.17886C>T | Unverified | CTC | ACC | TCT | 3 | C | T |
| TCGA-29-1703 | MUC16_ENS  | ENST00000331986     | p.T1595T  | c.4785C>T  | Unverified | TTG | GAC | ACA | 3 | C | T |
| TCGA-13-0920 | MUC16_ENS  | ENST00000397910     | p.I14083I | c.42249C>T | Verified   | ACC | ATC | TCC | 3 | C | T |
| TCGA-29-1703 | MUC16_ENS  | ENST00000397910     | p.T5962T  | c.17886C>T | Unverified | CTC | ACC | TCT | 3 | C | T |

|              |           |                 |          |            |            |     |     |     |   |   |   |
|--------------|-----------|-----------------|----------|------------|------------|-----|-----|-----|---|---|---|
| TCGA-04-1652 | MUC20     | ENST00000447234 | p.A521V  | c.1562C>T  | Unverified | GGA | GCT | CTG | 2 | C | T |
| TCGA-04-1652 | MUC20     | ENST00000447234 | p.A521V  | c.1562C>T  | Unverified | GGA | GCT | CTG | 2 | C | T |
| TCGA-24-2289 | MUC5AC    | ENST00000349637 | p.T4770M | c.14309C>T | Unverified | GGG | ACG | ACC | 2 | C | T |
| TCGA-13-0714 | MUC6      | ENST00000421673 | p.S1676S | c.5028C>T  | Unverified | ACC | AGC | GGG | 3 | C | T |
| TCGA-23-1122 | MVD       | ENST00000301012 | p.Q76*   | c.226C>T   | Unverified | GGG | CAG | CCG | 1 | C | T |
| TCGA-23-1809 | MVK       | ENST00000228510 | p.S150L  | c.449C>T   | Unverified | TAC | TCG | GTG | 2 | C | T |
| TCGA-24-1103 | MX2       | ENST00000330714 | p.S147S  | c.441C>T   | Verified   | GGC | AGC | GGA | 3 | C | T |
| TCGA-24-1470 | MXRA5     | ENST00000381114 | p.P820S  | c.2458C>T  | Verified   | CCA | CCT | TTT | 1 | C | T |
| TCGA-61-1895 | MXRA5     | ENST00000381114 | p.A2044V | c.6131C>T  | Unverified | GCG | GCA | CTG | 2 | C | T |
| TCGA-61-1895 | MXRA5_ENS | ENST00000381114 | p.A2044V | c.6131C>T  | Unverified | GCG | GCA | CTG | 2 | C | T |
| TCGA-13-1505 | MYCBPAP   | NM_032133.2     | p.R210C  | c.628C>T   | Unverified | cag | cgt | aac | 1 | C | T |
| TCGA-09-0369 | MYCN      | ENST00000281043 | p.P358L  | c.1073C>T  | Verified   | cgt | ccg | ctc | 2 | C | T |
| TCGA-09-0369 | MYCN      | ENST00000281043 | p.P358L  | c.1073C>T  | Verified   | cgt | ccg | ctc | 2 | C | T |
| TCGA-24-1563 | MYH1      | ENST00000226207 | p.R1638C | c.4912C>T  | Verified   | AAC | CGC | ATG | 1 | C | T |
| TCGA-29-1785 | MYH11     | ENST00000338282 | p.R1895C | c.5683C>T  | Unverified | CAG | CGC | ATC | 1 | C | T |
| TCGA-29-1785 | MYH11     | ENST00000338282 | p.R1895C | c.5683C>T  | Unverified | CAG | CGC | ATC | 1 | C | T |
| TCGA-29-1785 | MYH11_ENS | ENST00000396324 | p.R1902C | c.5704C>T  | Unverified | CAG | CGC | ATC | 1 | C | T |
| TCGA-29-1785 | MYH11_ENS | ENST00000396324 | p.R1902C | c.5704C>T  | Unverified | CAG | CGC | ATC | 1 | C | T |
| TCGA-30-1856 | MYH15     | ENST00000273353 | p.L892F  | c.2674C>T  | Unverified | TCC | CTC | ACT | 1 | C | T |
| TCGA-29-1763 | MYH4      | ENST00000255381 | p.F233F  | c.699C>T   | Unverified | GCC | TTC | GGC | 3 | C | T |
| TCGA-13-0913 | MYH7      | ENST00000355349 | p.R143W  | c.427C>T   | Verified   | TAC | CGG | GGC | 1 | C | T |
| TCGA-61-1910 | MYH9      | ENST00000216181 | p.T1009I | c.3026C>T  | Unverified | CTC | ACA | GAA | 2 | C | T |
| TCGA-04-1331 | MYLK      | NM_053025       | p.T690M  | c.2069C>T  | Unverified | gac | acg | ggc | 2 | C | T |
| TCGA-13-0887 | MYLK3     | SU_caMLCK       | p.F752F  | c.2256C>T  | Verified   | aac | ttc | ggc | 3 | C | T |
| TCGA-09-2044 | MYO10     | ENST00000274203 | p.A1743V | c.5228C>T  | Verified   | TTT | GCT | TTG | 2 | C | T |
| TCGA-61-2008 | MYO16     | ENST00000357550 | p.S1689S | c.5067C>T  | Unverified | AAA | TCC | GCG | 3 | C | T |
| TCGA-13-0904 | MYO18B    | ENST00000335473 | p.L736L  | c.2208C>T  | Unverified | CAG | CTC | CAG | 3 | C | T |
| TCGA-29-1783 | MYO1A     | ENST00000300119 | p.R352C  | c.1054C>T  | Unverified | agc | cgc | ctc | 1 | C | T |
| TCGA-24-1604 | MYO1F     | ENST00000338257 | p.Y242Y  | c.726C>T   | Verified   | ACC | TAC | CAG | 3 | C | T |
| TCGA-04-1542 | MYO3A     | ENST00000265944 | p.H1400Y | c.4198C>T  | Verified   | AAA | CAT | GAG | 1 | C | T |
| TCGA-13-1496 | MYO7A     | ENST00000409709 | p.R302C  | c.904C>T   | Unverified | ATC | CGC | TCC | 1 | C | T |
| TCGA-24-2267 | MYOCD     | ENST00000343344 | p.S185L  | c.554C>T   | Verified   | GCC | TCA | GAT | 2 | C | T |
| TCGA-24-2267 | MYOF      | ENST00000359263 | p.H927H  | c.2781C>T  | Verified   | GGT | CAC | ACG | 3 | C | T |
| TCGA-29-1696 | MYOM1     | ENST00000356443 | p.T1141I | c.3422C>T  | Unverified | GGA | ACC | AAA | 2 | C | T |

|              |                      |                 |          |           |            |     |     |     |   |   |   |
|--------------|----------------------|-----------------|----------|-----------|------------|-----|-----|-----|---|---|---|
| TCGA-29-1696 | MYOM1                | ENST00000356443 | p.T1141I | c.3422C>T | Unverified | GGA | ACC | AAA | 2 | C | T |
| TCGA-61-2095 | MYST4                | ENST00000287239 | p.Q2022* | c.6064C>T | Unverified | ATG | CAG | ATG | 1 | C | T |
| TCGA-04-1638 | MYT1L                | ENST00000399161 | p.G209G  | c.627C>T  | Unverified | CTC | GGC | AAA | 3 | C | T |
| TCGA-20-0990 | N4BP2L1              | ENST00000380139 | p.T136T  | c.408C>T  | Verified   | CAG | ACC | GAA | 3 | C | T |
| TCGA-61-1998 | NAA30                | ENST00000556492 | p.L191L  | c.571C>T  | Unverified | TCC | CTG | ACC | 1 | C | T |
| TCGA-29-1690 | NAP1L3               | ENST00000373079 | p.P308L  | c.923C>T  | Unverified | gac | cct | aaa | 2 | C | T |
| TCGA-29-1691 | NASP                 | ENST00000341288 | p.A737V  | c.2210C>T | Unverified | AAA | GCC | AAA | 2 | C | T |
| TCGA-24-1844 | NAT2                 | ENST00000286479 | p.Q143*  | c.427C>T  | Unverified | GAT | CAG | CCT | 1 | C | T |
| TCGA-23-1124 | NAV3                 | NM_014903.3     | p.R1937C | c.5809C>T | Verified   | aga | cgt | ctc | 1 | C | T |
| TCGA-13-0807 | NBEA                 | ENST00000310336 | p.R1325W | c.3973C>T | Verified   | CCA | CGG | ACT | 1 | C | T |
| TCGA-13-1496 | NBL1                 | ENST00000375136 | p.T41T   | c.123C>T  | Verified   | ATC | ACC | CAG | 3 | C | T |
| TCGA-13-1498 | NBL1                 | ENST00000375136 | p.T71T   | c.213C>T  | Unverified | AAC | ACC | TTC | 3 | C | T |
| TCGA-23-1122 | NBPF14               | ENST00000369219 | p.L909F  | c.2725C>T | Verified   | AGT | CTC | CAC | 1 | C | T |
| TCGA-04-1347 | NCAM2                | ENST00000400546 | p.P302S  | c.904C>T  | Verified   | CAG | CCT | CAC | 1 | C | T |
| TCGA-61-1899 | NCAM2                | ENST00000400546 | p.T79T   | c.237C>T  | Unverified | TTA | ACC | ATC | 3 | C | T |
| TCGA-25-1313 | NCAPD2               | ENST00000315579 | p.C816C  | c.2448C>T | Verified   | GTG | TGC | CAT | 3 | C | T |
| TCGA-29-1775 | NCAPD3               | ENST00000534548 | p.D1031D | c.3093C>T | Unverified | cca | gac | att | 3 | C | T |
| TCGA-29-2427 | NCAPG2               | NM_017760.4     | p.F289F  | c.867C>T  | Verified   | gac | ttc | atg | 3 | C | T |
| TCGA-13-0793 | NCOA1                | ENST00000406961 | p.P356L  | c.1067C>T | Verified   | CAA | CCT | TTC | 2 | C | T |
| TCGA-61-1895 | NCOA3                | ENST00000371998 | p.D718D  | c.2154C>T | Unverified | ggg | gac | gga | 3 | C | T |
| TCGA-13-1497 | NCOA6                | ENST00000374796 | p.R1323W | c.3967C>T | Verified   | AAA | CGG | GCA | 1 | C | T |
| TCGA-13-1510 | NDST1                | ENST00000261797 | p.R80C   | c.238C>T  | Unverified | TCC | CGC | ACA | 1 | C | T |
| TCGA-20-1686 | NDUFAF1              | ENST00000260361 | p.R217W  | c.649C>T  | Unverified | GGT | CGG | CCT | 1 | C | T |
| TCGA-23-1809 | NEB                  | ENST00000409198 | p.L2634L | c.7900C>T | Unverified | TGC | CTG | CCC | 1 | C | T |
| TCGA-23-1809 | NEB_ENST00000397345  | ENST00000397345 | p.L2634L | c.7900C>T | Unverified | TGC | CTG | CCC | 1 | C | T |
| TCGA-23-1809 | NEB_ENST00000427231  | ENST00000427231 | p.L2634L | c.7900C>T | Unverified | TGC | CTG | CCC | 1 | C | T |
| TCGA-61-1915 | NEBL_ENST00000417816 | ENST00000417816 | p.N40N   | c.120C>T  | Unverified | CTC | AAC | ATG | 3 | C | T |
| TCGA-13-1481 | NECAB2               | ENST00000305202 | p.L365L  | c.1093C>T | Verified   | ACA | CTG | AGC | 1 | C | T |
| TCGA-30-1714 | NEK11                | ENST00000429253 | p.R53*   | c.157C>T  | Unverified | AAA | CGA | GGA | 1 | C | T |
| TCGA-04-1652 | NES                  | ENST00000368223 | p.R766W  | c.2296C>T | Unverified | CGA | CGG | AGG | 1 | C | T |
| TCGA-04-1652 | NES                  | ENST00000368223 | p.R766W  | c.2296C>T | Unverified | CGA | CGG | AGG | 1 | C | T |
| TCGA-13-0900 | NEU1                 | ENST00000375631 | p.R294C  | c.880C>T  | Verified   | CTC | CGC | AGC | 1 | C | T |
| TCGA-24-2035 | NEU3                 | ENST00000294064 | p.H437Y  | c.1309C>T | Verified   | ACA | CAC | CGG | 1 | C | T |
| TCGA-20-0991 | NEUROD4              | ENST00000242994 | p.D105D  | c.315C>T  | Verified   | AAT | GAC | GCC | 3 | C | T |

|              |           |                 |          |           |            |     |     |     |   |   |   |
|--------------|-----------|-----------------|----------|-----------|------------|-----|-----|-----|---|---|---|
| TCGA-04-1367 | NF1       | ENST00000358273 | p.Q112*  | c.334C>T  | Verified   | AAA | CAG | TTG | 1 | C | T |
| TCGA-24-2024 | NFASC     | ENST00000360049 | p.R844C  | c.2530C>T | Verified   | AAC | CGC | GTC | 1 | C | T |
| TCGA-04-1356 | NFATC1    | ENST00000329101 | p.H554H  | c.1662C>T | Unverified | ggt | cac | gtc | 3 | C | T |
| TCGA-24-1850 | NFATC2    | ENST00000396009 | p.T512I  | c.1535C>T | Unverified | GCA | ACC | ATC | 2 | C | T |
| TCGA-09-1674 | NFE2L1    | ENST00000362042 | p.F625F  | c.1875C>T | Unverified | CCT | TTC | ACC | 3 | C | T |
| TCGA-29-1761 | NFKB1     | ENST00000226574 | p.A111V  | c.332C>T  | Unverified | CAT | GCC | CAC | 2 | C | T |
| TCGA-24-2290 | NFRKB     | ENST00000524794 | p.A1056A | c.3168C>T | Verified   | AGT | GCC | CCT | 3 | C | T |
| TCGA-24-2290 | NFRKB     | ENST00000524794 | p.A1056A | c.3168C>T | Verified   | AGT | GCC | CCT | 3 | C | T |
| TCGA-13-1498 | NFS1      | ENST00000374092 | p.Q235*  | c.703C>T  | Verified   | GCC | CAG | GCT | 1 | C | T |
| TCGA-24-1845 | NIP7      | ENST00000254940 | p.P158S  | c.472C>T  | Unverified | GAC | CCC | ATG | 1 | C | T |
| TCGA-25-2042 | NIT2      | ENST00000394140 | p.H221Y  | c.661C>T  | Verified   | GGA | CAC | AGC | 1 | C | T |
| TCGA-24-2267 | NKAP      | ENST00000371410 | p.A86V   | c.257C>T  | Verified   | TCT | GCG | CCC | 2 | C | T |
| TCGA-24-1423 | NLGN4X    | ENST00000381095 | p.D617D  | c.1851C>T | Unverified | cca | gac | atg | 3 | C | T |
| TCGA-13-0893 | NLRP12    | ENST00000324134 | p.N505N  | c.1515C>T | Verified   | ATC | AAC | TGT | 3 | C | T |
| TCGA-29-1781 | NLRP2_ENS | ENST00000543010 | p.L813L  | c.2437C>T | Unverified | TCC | CTG | ACG | 1 | C | T |
| TCGA-29-1770 | NLRP3     | ENST00000391828 | p.P294L  | c.881C>T  | Unverified | aaa | ccc | tcc | 2 | C | T |
| TCGA-24-1563 | NLRP5     | ENST00000390649 | p.R562C  | c.1684C>T | Verified   | CTC | CGT | GCT | 1 | C | T |
| TCGA-04-1342 | NLRP5     | ENST00000390649 | p.T281M  | c.842C>T  | Verified   | CGC | ACG | GTG | 2 | C | T |
| TCGA-61-1914 | NLRP5_ENS | ENST00000390649 | p.I1061I | c.3183C>T | Unverified | GTG | ATC | TCG | 3 | C | T |
| TCGA-24-1844 | NLRP7     | ENST00000448121 | p.L551L  | c.1651C>T | Unverified | TTG | CTG | CAA | 1 | C | T |
| TCGA-24-1844 | NLRP7_ENS | ENST00000328092 | p.L551L  | c.1651C>T | Unverified | TTG | CTG | CAA | 1 | C | T |
| TCGA-23-1032 | NMBR      | ENST00000258042 | p.S102L  | c.305C>T  | Unverified | GCC | TCG | CGC | 2 | C | T |
| TCGA-61-1907 | NMT2      | ENST00000378165 | p.R148C  | c.442C>T  | Unverified | GTA | CGC | CAA | 1 | C | T |
| TCGA-04-1652 | NMUR2     | ENST00000255262 | p.T123M  | c.368C>T  | Unverified | AAG | ACG | GCC | 2 | C | T |
| TCGA-04-1652 | NMUR2     | ENST00000255262 | p.T123M  | c.368C>T  | Unverified | AAG | ACG | GCC | 2 | C | T |
| TCGA-24-1850 | NNT       | ENST00000264663 | p.G804G  | c.2412C>T | Unverified | ACT | GGC | ATC | 3 | C | T |
| TCGA-29-1695 | NOBOX     | ENST00000223140 | p.R324W  | c.970C>T  | Unverified | CGC | CGG | GCC | 1 | C | T |
| TCGA-04-1638 | NOBOX     | ENST00000223140 | p.S54S   | c.162C>T  | Unverified | AGC | TCC | TTC | 3 | C | T |
| TCGA-29-1695 | NOBOX_ENS | ENST00000467773 | p.R356W  | c.1066C>T | Unverified | CGC | CGG | GCC | 1 | C | T |
| TCGA-04-1638 | NOBOX_ENS | ENST00000467773 | p.S54S   | c.162C>T  | Unverified | AGC | TCC | TTC | 3 | C | T |
| TCGA-04-1542 | NOD2      | ENST00000300589 | p.Q571*  | c.1711C>T | Verified   | ctc | cag | gca | 1 | C | T |
| TCGA-29-1711 | NODAL     | ENST00000287139 | p.P182L  | c.545C>T  | Unverified | TGG | CCG | CGG | 2 | C | T |
| TCGA-29-1711 | NODAL     | ENST00000287139 | p.P182L  | c.545C>T  | Unverified | TGG | CCG | CGG | 2 | C | T |
| TCGA-25-2391 | NOG       | ENST00000332822 | p.S195S  | c.585C>T  | Unverified | CCG | TCC | AAG | 3 | C | T |

|              |           |                 |          |           |            |     |     |     |   |   |   |
|--------------|-----------|-----------------|----------|-----------|------------|-----|-----|-----|---|---|---|
| TCGA-13-0916 | NOLC1     | ENST00000370007 | p.R262W  | c.784C>T  | Verified   | ACC | CGG | AAG | 1 | C | T |
| TCGA-24-2280 | NOMO1     | ENST00000287667 | p.A599V  | c.1796C>T | Unverified | CAC | GCC | ATC | 2 | C | T |
| TCGA-04-1331 | NOP56     | ENST00000329276 | p.Q215*  | c.643C>T  | Unverified | GCC | CAG | TTT | 1 | C | T |
| TCGA-61-2012 | NOTCH1    | ENST00000277541 | p.R2327W | c.6979C>T | Unverified | CTG | CGG | GGG | 1 | C | T |
| TCGA-29-2427 | NOTCH1    | ENST00000277541 | p.D1807D | c.5421C>T | Unverified | ATG | GAC | GAC | 3 | C | T |
| TCGA-61-2012 | NOTCH1_EN | ENST00000277541 | p.R2327W | c.6979C>T | Unverified | CTG | CGG | GGG | 1 | C | T |
| TCGA-29-2427 | NOTCH1_EN | ENST00000277541 | p.D1807D | c.5421C>T | Unverified | ATG | GAC | GAC | 3 | C | T |
| TCGA-24-1849 | NOTCH2    | ENST00000256646 | p.R5R    | c.15C>T   | Unverified | ctg | cgc | ccc | 3 | C | T |
| TCGA-04-1347 | NOTCH4    | ENST00000375023 | p.R132C  | c.394C>T  | Verified   | ggc | cgc | tgc | 1 | C | T |
| TCGA-61-1915 | NOTCH4    | ENST00000375023 | p.P1173S | c.3517C>T | Unverified | aaa | ccc | gga | 1 | C | T |
| TCGA-09-2044 | NPBWR1    | ENST00000331251 | p.T323I  | c.968C>T  | Verified   | ATA | ACT | TGC | 2 | C | T |
| TCGA-29-1768 | NPC1      | ENST00000269228 | p.S1197S | c.3591C>T | Unverified | AGC | TCC | GTG | 3 | C | T |
| TCGA-23-1114 | NPC1      | ENST00000269228 | p.S809S  | c.2427C>T | Unverified | ACA | AGC | GTC | 3 | C | T |
| TCGA-10-0930 | NPC1L1    | ENST00000289547 | p.P1149P | c.3447C>T | Verified   | GTG | CCC | ACC | 3 | C | T |
| TCGA-10-0930 | NPC1L1    | ENST00000289547 | p.P1149P | c.3447C>T | Verified   | GTG | CCC | ACC | 3 | C | T |
| TCGA-29-1784 | NPHP4     | ENST00000378156 | p.S209F  | c.626C>T  | Unverified | GTG | TCT | GGT | 2 | C | T |
| TCGA-13-1509 | NPHS1     | ENST00000378910 | p.R695W  | c.2083C>T | Verified   | CCC | CGG | CAT | 1 | C | T |
| TCGA-29-1785 | NPHS1     | ENST00000378910 | p.Y1193Y | c.3579C>T | Unverified | CTC | TAC | GAT | 3 | C | T |
| TCGA-29-1785 | NPHS1     | ENST00000378910 | p.Y1193Y | c.3579C>T | Unverified | CTC | TAC | GAT | 3 | C | T |
| TCGA-13-0795 | NR2C1     | ENST00000333003 | p.N317N  | c.951C>T  | Verified   | ACC | AAC | GGT | 3 | C | T |
| TCGA-61-1904 | NR3C2     | ENST00000358102 | p.R28C   | c.82C>T   | Unverified | GAG | CGT | TCT | 1 | C | T |
| TCGA-13-1488 | NRK       | SU_ZC4-NRK      | p.S108S  | c.324C>T  | Verified   | gtg | tcc | ttc | 3 | C | T |
| TCGA-23-2078 | NRXN1_ENS | ENST00000406316 | p.T1035I | c.3104C>T | Verified   | GAA | ACA | TAC | 2 | C | T |
| TCGA-24-1847 | NRXN3_ENS | ENST00000428277 | p.S42S   | c.126C>T  | Unverified | TCC | TCC | TCC | 3 | C | T |
| TCGA-04-1338 | NT5E      | ENST00000257770 | p.S438S  | c.1314C>T | Verified   | CAT | AGC | GTG | 3 | C | T |
| TCGA-25-1313 | NTRK1     | ENST00000524377 | p.R649W  | c.1945C>T | Verified   | CAC | CGG | GAC | 1 | C | T |
| TCGA-24-2280 | NTRK1     | ENST00000524377 | p.T264M  | c.791C>T  | Unverified | GTG | ACG | TGC | 2 | C | T |
| TCGA-13-1498 | NTRK1     | ENST00000524377 | p.V634V  | c.1902C>T | Verified   | CAG | GTC | GCT | 3 | C | T |
| TCGA-24-2280 | NTRK1_ENS | ENST00000392302 | p.T234M  | c.701C>T  | Unverified | GTG | ACG | TGC | 2 | C | T |
| TCGA-61-1733 | NTRK2     | ENST00000376214 | p.N355N  | c.1065C>T | Unverified | ATG | AAC | AAT | 3 | C | T |
| TCGA-61-1733 | NTRK2     | ENST00000376214 | p.N355N  | c.1065C>T | Unverified | ATG | AAC | AAT | 3 | C | T |
| TCGA-61-1733 | NTRK2_ENS | ENST00000304053 | p.N355N  | c.1065C>T | Unverified | ATG | AAC | AAT | 3 | C | T |
| TCGA-61-1733 | NTRK2_ENS | ENST00000304053 | p.N355N  | c.1065C>T | Unverified | ATG | AAC | AAT | 3 | C | T |
| TCGA-61-1733 | NTRK2_ENS | ENST00000376214 | p.N355N  | c.1065C>T | Unverified | ATG | AAC | AAT | 3 | C | T |

|              |            |                 |          |           |            |     |     |     |   |   |   |
|--------------|------------|-----------------|----------|-----------|------------|-----|-----|-----|---|---|---|
| TCGA-61-1733 | NTRK2_ENS  | ENST00000376214 | p.N355N  | c.1065C>T | Unverified | ATG | AAC | AAT | 3 | C | T |
| TCGA-24-1845 | NTRK3      | ENST00000394480 | p.P304L  | c.911C>T  | Unverified | TAT | CCC | CCA | 2 | C | T |
| TCGA-24-1845 | NTRK3_ENS  | ENST00000317501 | p.P304L  | c.911C>T  | Unverified | TAT | CCC | CCA | 2 | C | T |
| TCGA-24-1845 | NTRK3_ENS  | ENST00000360948 | p.P304L  | c.911C>T  | Unverified | TAT | CCC | CCA | 2 | C | T |
| TCGA-24-1844 | NUDT11     | ENST00000375992 | p.S27S   | c.81C>T   | Unverified | cgg | agc | gaa | 3 | C | T |
| TCGA-61-1914 | NUDT16     | ENST00000359850 | p.G132G  | c.396C>T  | Unverified | ATT | GGC | TCT | 3 | C | T |
| TCGA-24-2289 | NUMA1      | ENST00000393695 | p.A601V  | c.1802C>T | Unverified | gat | gcg | gct | 2 | C | T |
| TCGA-23-1022 | NUMBL      | ENST00000252891 | p.R94W   | c.280C>T  | Verified   | TCC | CGG | GGA | 1 | C | T |
| TCGA-24-1850 | NUP155     | ENST00000231498 | p.A646A  | c.1938C>T | Unverified | CAG | GCC | ACA | 3 | C | T |
| TCGA-13-1481 | NUP160     | ENST00000378460 | p.P768S  | c.2302C>T | Verified   | GCT | CCC | CTA | 1 | C | T |
| TCGA-23-1123 | NUP160     | ENST00000378460 | p.R43W   | c.127C>T  | Verified   | GAA | CGG | AGC | 1 | C | T |
| TCGA-23-1123 | NUP160     | ENST00000378460 | p.R43W   | c.127C>T  | Verified   | GAA | CGG | AGC | 1 | C | T |
| TCGA-04-1342 | NUP160     | ENST00000378460 | p.R53R   | c.159C>T  | Verified   | GAG | CGC | GAA | 3 | C | T |
| TCGA-13-1512 | NUP210     | ENST00000254508 | p.D1221D | c.3663C>T | Verified   | CTG | GAC | CTC | 3 | C | T |
| TCGA-29-1693 | NXF2       | ENST00000372757 | p.T101M  | c.302C>T  | Unverified | ACC | ACG | TGG | 2 | C | T |
| TCGA-24-1845 | NXF2B      | ENST00000372750 | p.P108S  | c.322C>T  | Unverified | CCT | CCG | GAG | 1 | C | T |
| TCGA-13-1498 | O52L2_HUM  | ENST00000316540 | p.Q315*  | c.943C>T  | Verified   | ACC | CAG | AAG | 1 | C | T |
| TCGA-13-0890 | O95431_HU  | ENST00000238638 | p.T128I  | c.383C>T  | Verified   | CGA | ACC | AGC | 2 | C | T |
| TCGA-24-1845 | OASL       | ENST00000257570 | p.Q435*  | c.1303C>T | Unverified | ATC | CAG | GTC | 1 | C | T |
| TCGA-61-1738 | OASL       | ENST00000257570 | p.I178I  | c.534C>T  | Unverified | CTG | ATC | AAG | 3 | C | T |
| TCGA-61-1738 | OASL       | ENST00000257570 | p.I178I  | c.534C>T  | Unverified | CTG | ATC | AAG | 3 | C | T |
| TCGA-23-1029 | OBFC1      | ENST00000369764 | p.D156D  | c.468C>T  | Unverified | GTG | GAC | GAC | 3 | C | T |
| TCGA-24-1845 | OCA2       | ENST00000354638 | p.Q309*  | c.925C>T  | Unverified | CTG | CAG | CAG | 1 | C | T |
| TCGA-29-1691 | ODC1       | ENST00000234111 | p.R165C  | c.493C>T  | Unverified | TGT | CGT | CTC | 1 | C | T |
| TCGA-13-0913 | ODF2L      | ENST00000370567 | p.T444M  | c.1331C>T | Verified   | TTG | ACG | GCG | 2 | C | T |
| TCGA-13-0904 | ODZ1       | ENST00000371130 | p.A2258V | c.6773C>T | Verified   | GTC | GCG | AGT | 2 | C | T |
| TCGA-29-1699 | ODZ2       | ENST00000388903 | p.T2539M | c.7616C>T | Unverified | AGC | ACC | GGG | 2 | C | T |
| TCGA-29-1699 | ODZ2_ENSTI | ENST00000518659 | p.T2706M | c.8117C>T | Unverified | GGC | ACG | GCC | 2 | C | T |
| TCGA-29-1699 | ODZ2_ENSTI | ENST00000519204 | p.T2585M | c.7754C>T | Unverified | GGC | ACG | GCC | 2 | C | T |
| TCGA-61-1737 | OFCC1      | ENST00000331403 | p.T109M  | c.326C>T  | Unverified | GCG | ACG | GAG | 2 | C | T |
| TCGA-29-1784 | OFCC1      | ENST00000331403 | p.Y89Y   | c.267C>T  | Unverified | GAA | TAC | GGC | 3 | C | T |
| TCGA-09-2051 | OGDHL      | ENST00000374103 | p.N482N  | c.1446C>T | Unverified | AGA | AAC | ACT | 3 | C | T |
| TCGA-61-1910 | OGN        | ENST00000375561 | p.D110D  | c.330C>T  | Unverified | GTT | GAC | ATT | 3 | C | T |
| TCGA-29-1766 | OLFML1     | ENST00000329293 | p.T53M   | c.158C>T  | Unverified | GCA | ACG | AGG | 2 | C | T |

|              |         |                 |         |           |            |     |     |     |   |   |   |
|--------------|---------|-----------------|---------|-----------|------------|-----|-----|-----|---|---|---|
| TCGA-61-2009 | OMG     | ENST00000247271 | p.P253L | c.758C>T  | Verified   | ACT | CCA | TGT | 2 | C | T |
| TCGA-61-2012 | ONECUT2 | ENST00000262095 | p.R438C | c.1312C>T | Verified   | CAA | CGC | CGA | 1 | C | T |
| TCGA-20-1683 | OPA1    | ENST00000361510 | p.R873W | c.2617C>T | Unverified | GTC | CGG | AAG | 1 | C | T |
| TCGA-24-0975 | OPLAH   | ENST00000360660 | p.H29H  | c.87C>T   | Unverified | GGG | CAC | GTG | 3 | C | T |
| TCGA-09-0369 | OR10A7  | ENST00000326258 | p.T232I | c.695C>T  | Verified   | GCC | ACT | GGC | 2 | C | T |
| TCGA-09-0369 | OR10A7  | ENST00000326258 | p.T232I | c.695C>T  | Verified   | GCC | ACT | GGC | 2 | C | T |
| TCGA-24-2288 | OR10C1  | ENST00000444197 | p.T307M | c.920C>T  | Unverified | AAA | ACG | GTG | 2 | C | T |
| TCGA-24-2024 | OR10G4  | ENST00000320891 | p.A297V | c.890C>T  | Verified   | AAA | GCT | GTG | 2 | C | T |
| TCGA-13-0885 | OR10J3  | ENST00000332217 | p.S268F | c.803C>T  | Verified   | AGT | TCC | CTG | 2 | C | T |
| TCGA-24-1464 | OR10Q1  | ENST00000316770 | p.R142R | c.426C>T  | Verified   | ACC | CGC | GAG | 3 | C | T |
| TCGA-29-1763 | OR10R2  | ENST00000368152 | p.T295M | c.884C>T  | Unverified | GTG | ACG | GTG | 2 | C | T |
| TCGA-24-2289 | OR10W1  | ENST00000395079 | p.G55G  | c.165C>T  | Unverified | CTG | GGC | AGC | 3 | C | T |
| TCGA-23-1124 | OR11H4  | ENST00000315409 | p.S85S  | c.255C>T  | Verified   | GTG | TCC | TCC | 3 | C | T |
| TCGA-13-0755 | OR12D3  | ENST00000377143 | p.A110V | c.329C>T  | Verified   | GAG | GCC | ATT | 2 | C | T |
| TCGA-25-1326 | OR1K1   | ENST00000277309 | p.P132S | c.394C>T  | Verified   | CTC | CCC | TAT | 1 | C | T |
| TCGA-13-1507 | OR1Q1   | ENST00000297913 | p.G233G | c.699C>T  | Verified   | AAG | GGC | AGG | 3 | C | T |
| TCGA-09-2049 | OR1S2   | ENST00000302592 | p.H189H | c.567C>T  | Verified   | CCA | CAC | TTC | 3 | C | T |
| TCGA-24-1422 | OR2A5   | ENST00000408906 | p.I181I | c.543C>T  | Verified   | GAA | ATC | CTG | 3 | C | T |
| TCGA-29-1784 | OR2F2   | ENST00000408955 | p.P79S  | c.235C>T  | Unverified | GTC | CCC | CAG | 1 | C | T |
| TCGA-13-1497 | OR2G6   | ENST00000343414 | p.T193I | c.578C>T  | Verified   | ACG | ACT | TTC | 2 | C | T |
| TCGA-25-2393 | OR2G6   | ENST00000343414 | p.Y132Y | c.396C>T  | Unverified | CGC | TAC | ATA | 3 | C | T |
| TCGA-29-1766 | OR2J2   | ENST00000377167 | p.T241I | c.722C>T  | Unverified | AGG | ACA | TGT | 2 | C | T |
| TCGA-61-1899 | OR2M4   | ENST00000306687 | p.L15L  | c.43C>T   | Unverified | CTG | CTG | GGA | 1 | C | T |
| TCGA-30-1714 | OR2M4   | ENST00000306687 | p.T267M | c.800C>T  | Unverified | CAT | ACG | CCA | 2 | C | T |
| TCGA-29-1690 | OR2T2   | ENST00000342927 | p.I222I | c.666C>T  | Unverified | CAC | ATC | CTC | 3 | C | T |
| TCGA-13-0916 | OR2T6   | ENST00000355728 | p.G88G  | c.264C>T  | Verified   | ATG | GGC | GAG | 3 | C | T |
| TCGA-24-1422 | OR4A47  | ENST00000446524 | p.P181L | c.542C>T  | Verified   | TAT | CCC | TTA | 2 | C | T |
| TCGA-23-1114 | OR4M2   | ENST00000332663 | p.P282S | c.844C>T  | Unverified | TTC | CCT | TTA | 1 | C | T |
| TCGA-29-1695 | OR4X1   | ENST00000320048 | p.R120C | c.358C>T  | Unverified | GAC | CGC | TAT | 1 | C | T |
| TCGA-29-1699 | OR52A5  | ENST00000307388 | p.Q301* | c.901C>T  | Unverified | AAG | CAA | ATT | 1 | C | T |
| TCGA-24-1850 | OR52K2  | ENST00000325719 | p.T298T | c.894C>T  | Unverified | AAG | ACC | AAG | 3 | C | T |
| TCGA-29-1761 | OR52N1  | ENST00000317078 | p.T7T   | c.21C>T   | Unverified | GGC | ACC | AGC | 3 | C | T |
| TCGA-29-1761 | OR5B2   | ENST00000302581 | p.S169F | c.506C>T  | Unverified | AAA | TCC | AAT | 2 | C | T |
| TCGA-61-1740 | OR5F1   | ENST00000278409 | p.T110T | c.330C>T  | Unverified | ACA | ACC | GAA | 3 | C | T |



|              |            |                 |          |           |            |     |     |     |   |   |   |
|--------------|------------|-----------------|----------|-----------|------------|-----|-----|-----|---|---|---|
| TCGA-13-1496 | OR5H2      | ENST00000355273 | p.L53F   | c.157C>T  | Verified   | GCT | CTT | ATC | 1 | C | T |
| TCGA-13-0920 | OR5I1      | ENST00000301532 | p.T59T   | c.177C>T  | Unverified | CAA | ACC | CCC | 3 | C | T |
| TCGA-13-1499 | OR5M1_ENS  | ENST00000526538 | p.L107L  | c.319C>T  | Verified   | GCC | CTG | GTG | 1 | C | T |
| TCGA-25-1313 | OR5T1      | ENST00000313033 | p.F322F  | c.966C>T  | Verified   | TGG | TTC | ATA | 3 | C | T |
| TCGA-25-2398 | OR6A2      | ENST00000332601 | p.R266W  | c.796C>T  | Verified   | GCT | CGG | CCA | 1 | C | T |
| TCGA-24-2280 | OR6B3      | ENST00000319423 | p.R91C   | c.271C>T  | Unverified | AAA | CGC | ATC | 1 | C | T |
| TCGA-29-1702 | OR6K6      | ENST00000368144 | p.F96F   | c.288C>T  | Unverified | TCC | TTC | CTG | 3 | C | T |
| TCGA-09-2050 | OR6X1      | ENST00000327930 | p.F166F  | c.498C>T  | Verified   | CCA | TTC | TGT | 3 | C | T |
| TCGA-29-1764 | OR7D4      | ENST00000308682 | p.Y278Y  | c.834C>T  | Unverified | ATG | TAC | GCC | 3 | C | T |
| TCGA-61-2094 | OR7E24     | ENST00000456448 | p.S82F   | c.245C>T  | Unverified | CTC | TCC | AAC | 2 | C | T |
| TCGA-29-1695 | OR8H1      | ENST00000313022 | p.T15M   | c.44C>T   | Unverified | CTT | ACG | GGA | 2 | C | T |
| TCGA-30-1718 | OR8H3      | ENST00000313472 | p.N172N  | c.516C>T  | Unverified | TCA | AAC | ATA | 3 | C | T |
| TCGA-29-1770 | OR8I2      | ENST00000302124 | p.V280V  | c.840C>T  | Unverified | ATT | GTC | ATT | 3 | C | T |
| TCGA-61-1740 | OR8J3      | ENST00000301529 | p.G72G   | c.216C>T  | Unverified | CTT | GGC | AAC | 3 | C | T |
| TCGA-13-0714 | OR9Q1      | ENST00000335397 | p.A230V  | c.689C>T  | Verified   | CCT | GCT | GGA | 2 | C | T |
| TCGA-29-1776 | ORC2       | ENST00000234296 | p.T450I  | c.1349C>T | Unverified | act | aca | tac | 2 | C | T |
| TCGA-25-2392 | OSBPL1A    | ENST00000319481 | p.C872C  | c.2616C>T | Verified   | GAC | TGC | AGG | 3 | C | T |
| TCGA-24-2267 | OTOF       | ENST00000272371 | p.R1680C | c.5038C>T | Unverified | TGC | CGC | CTG | 1 | C | T |
| TCGA-25-2392 | OTOF       | ENST00000272371 | p.P476S  | c.1426C>T | Unverified | GAG | CCC | CTG | 1 | C | T |
| TCGA-61-1904 | OTOF       | ENST00000272371 | p.P218S  | c.652C>T  | Unverified | GAT | CCC | GAC | 1 | C | T |
| TCGA-13-1497 | OTOF       | ENST00000272371 | p.S1456F | c.4367C>T | Verified   | GGC | TCC | CTC | 2 | C | T |
| TCGA-24-2267 | OTOF_ENSTI | ENST00000339598 | p.R913C  | c.2737C>T | Unverified | TGC | CGC | CTG | 1 | C | T |
| TCGA-13-1497 | OTOF_ENSTI | ENST00000339598 | p.S689F  | c.2066C>T | Verified   | GGC | TCC | CTC | 2 | C | T |
| TCGA-04-1362 | OTOP2      | ENST00000331427 | p.R548C  | c.1642C>T | Verified   | TAC | CGC | ATG | 1 | C | T |
| TCGA-13-1497 | OTOP3      | ENST00000328801 | p.L534F  | c.1600C>T | Verified   | TTC | CTC | ATC | 1 | C | T |
| TCGA-04-1655 | OTUD7B     | ENST00000369135 | p.R233C  | c.697C>T  | Unverified | AGG | CGC | TGG | 1 | C | T |
| TCGA-61-2009 | OVCH1      | ENST00000318184 | p.A477V  | c.1430C>T | Verified   | GAT | GCT | GTT | 2 | C | T |
| TCGA-61-1738 | P2RX1      | ENST00000225538 | p.N153N  | c.459C>T  | Unverified | TTC | AAC | GAC | 3 | C | T |
| TCGA-61-1738 | P2RX1      | ENST00000225538 | p.N153N  | c.459C>T  | Unverified | TTC | AAC | GAC | 3 | C | T |
| TCGA-29-1702 | P2RY1      | ENST00000305097 | p.A327V  | c.980C>T  | Unverified | TTG | GCG | GGA | 2 | C | T |
| TCGA-04-1638 | P2RY11     | ENST00000321826 | p.R103C  | c.307C>T  | Unverified | TGC | CGC | CTG | 1 | C | T |
| TCGA-29-1693 | P2RY11     | ENST00000321826 | p.A313A  | c.939C>T  | Unverified | CTG | GCC | TTC | 3 | C | T |
| TCGA-09-2044 | PACS1      | ENST00000320580 | p.R203W  | c.607C>T  | Verified   | AAT | CGG | ACC | 1 | C | T |
| TCGA-30-1856 | PADI2      | NM_007365.1     | p.R126W  | c.376C>T  | Unverified | gac | cgg | gat | 1 | C | T |

|              |           |                 |          |           |            |     |     |     |   |   |   |
|--------------|-----------|-----------------|----------|-----------|------------|-----|-----|-----|---|---|---|
| TCGA-61-1914 | PAH       | ENST00000553106 | p.I174I  | c.522C>T  | Unverified | CCC | ATC | CCT | 3 | C | T |
| TCGA-29-1698 | PAK6      | ENST00000441369 | p.S628S  | c.1884C>T | Unverified | gtc | tcc | cca | 3 | C | T |
| TCGA-13-1498 | PAK7      | ENST00000378429 | p.S260S  | c.780C>T  | Verified   | ccc | agc | ctg | 3 | C | T |
| TCGA-09-2056 | PALB2     | ENST00000261584 | p.Q370*  | c.1108C>T | Verified   | CTT | CAG | GAA | 1 | C | T |
| TCGA-23-1124 | PALLD     | ENST00000261509 | p.H823H  | c.2469C>T | Verified   | GAT | CAC | TAC | 3 | C | T |
| TCGA-24-1850 | PALM2     | ENST00000374531 | p.R70W   | c.208C>T  | Unverified | AGG | CGG | CAG | 1 | C | T |
| TCGA-24-1850 | PALM2-AKA | ENST00000374530 | p.R68W   | c.202C>T  | Unverified | AGG | CGG | CAG | 1 | C | T |
| TCGA-13-0760 | PAMR1     | ENST00000278360 | p.R699C  | c.2095C>T | Verified   | CCA | CGC | TGG | 1 | C | T |
| TCGA-24-1846 | PAPOLA    | ENST00000216277 | p.N557N  | c.1671C>T | Unverified | AGA | AAC | AGT | 3 | C | T |
| TCGA-29-1761 | PAPPA2    | ENST00000367662 | p.D1547D | c.4641C>T | Unverified | CAC | GAC | GTG | 3 | C | T |
| TCGA-29-1784 | PAPPA2    | ENST00000367662 | p.P847P  | c.2541C>T | Unverified | ATC | CCC | ATT | 3 | C | T |
| TCGA-09-1665 | PAQR5     | ENST00000395407 | p.S98S   | c.294C>T  | Verified   | GTG | TCC | AGC | 3 | C | T |
| TCGA-13-1505 | PARD6A    | ENST00000219255 | p.R262C  | c.784C>T  | Verified   | GGG | CGT | TTG | 1 | C | T |
| TCGA-24-2024 | PARP1     | ENST00000366794 | p.T556T  | c.1668C>T | Verified   | GCC | ACC | CTT | 3 | C | T |
| TCGA-24-1422 | PARP12    | ENST00000263549 | p.R582W  | c.1744C>T | Verified   | TGG | CGG | GTC | 1 | C | T |
| TCGA-61-1914 | PARP9     | ENST00000360356 | p.P843S  | c.2527C>T | Unverified | CAT | CCT | TGG | 1 | C | T |
| TCGA-23-1117 | PASD1     | ENST00000370357 | p.A194V  | c.581C>T  | Verified   | GAA | GCT | GTA | 2 | C | T |
| TCGA-23-1117 | PASD1     | ENST00000370357 | p.A194V  | c.581C>T  | Verified   | GAA | GCT | GTA | 2 | C | T |
| TCGA-25-1318 | PASD1     | ENST00000370357 | p.T675I  | c.2024C>T | Verified   | ATA | ACT | TCA | 2 | C | T |
| TCGA-25-1318 | PASD1     | ENST00000370357 | p.T675I  | c.2024C>T | Verified   | ATA | ACT | TCA | 2 | C | T |
| TCGA-13-1481 | PCDH12    | ENST00000231484 | p.S992S  | c.2976C>T | Verified   | GGC | AGC | AGG | 3 | C | T |
| TCGA-24-1470 | PCDH15    | ENST00000361849 | p.L429L  | c.1285C>T | Verified   | GCT | CTG | GAC | 1 | C | T |
| TCGA-61-1906 | PCDH15    | ENST00000361849 | p.R962C  | c.2884C>T | Unverified | AGT | CGT | GTG | 1 | C | T |
| TCGA-61-1906 | PCDH15    | ENST00000361849 | p.R962C  | c.2884C>T | Unverified | AGT | CGT | GTG | 1 | C | T |
| TCGA-61-1906 | PCDH15_EN | ENST00000395438 | p.R962C  | c.2884C>T | Unverified | AGT | CGT | GTG | 1 | C | T |
| TCGA-61-1906 | PCDH15_EN | ENST00000395438 | p.R962C  | c.2884C>T | Unverified | AGT | CGT | GTG | 1 | C | T |
| TCGA-61-1906 | PCDH15_EN | ENST00000414778 | p.R967C  | c.2899C>T | Unverified | AGT | CGT | GTG | 1 | C | T |
| TCGA-61-1906 | PCDH15_EN | ENST00000414778 | p.R967C  | c.2899C>T | Unverified | AGT | CGT | GTG | 1 | C | T |
| TCGA-61-1906 | PCDH15_EN | ENST00000417177 | p.R967C  | c.2899C>T | Unverified | AGT | CGT | GTG | 1 | C | T |
| TCGA-61-1906 | PCDH15_EN | ENST00000417177 | p.R967C  | c.2899C>T | Unverified | AGT | CGT | GTG | 1 | C | T |
| TCGA-29-1784 | PCDH19    | ENST00000373034 | p.P566S  | c.1696C>T | Unverified | GCC | CCA | CCT | 1 | C | T |
| TCGA-29-1784 | PCDH19_NM | NM_020766.1     | p.P67S   | c.199C>T  | Unverified | gcc | cca | cct | 1 | C | T |
| TCGA-13-1489 | PCDH9     | ENST00000377865 | p.P1145S | c.3433C>T | Verified   | ATG | CCT | CCT | 1 | C | T |
| TCGA-24-2035 | PCDHA10   | ENST00000506939 | p.S614S  | c.1842C>T | Verified   | CAA | TCC | GGT | 3 | C | T |

|              |           |                 |          |           |            |     |     |     |   |   |   |
|--------------|-----------|-----------------|----------|-----------|------------|-----|-----|-----|---|---|---|
| TCGA-23-2078 | PCDHA13   | ENST00000289272 | p.S280L  | c.839C>T  | Unverified | TAC | TCA | TTT | 2 | C | T |
| TCGA-24-1843 | PCDHA13   | ENST00000289272 | p.D481D  | c.1443C>T | Unverified | CAG | GAC | GCG | 3 | C | T |
| TCGA-24-2035 | PCDHA13   | ENST00000289272 | p.S879S  | c.2637C>T | Verified   | CAA | TCC | GGT | 3 | C | T |
| TCGA-09-2050 | PCDHA2    | ENST00000378132 | p.S411S  | c.1233C>T | Verified   | GAC | AGC | GCC | 3 | C | T |
| TCGA-61-1998 | PCDHA4    | ENST00000356878 | p.P134S  | c.400C>T  | Unverified | TTC | CCA | GCA | 1 | C | T |
| TCGA-29-1766 | PCDHA4    | ENST00000356878 | p.F455F  | c.1365C>T | Unverified | GCG | TTC | GCG | 3 | C | T |
| TCGA-29-1766 | PCDHA4_EN | ENST00000530339 | p.F455F  | c.1365C>T | Unverified | GCG | TTC | GCG | 3 | C | T |
| TCGA-24-2035 | PCDHAC1   | ENST00000253807 | p.S892S  | c.2676C>T | Verified   | CAA | TCC | GGT | 3 | C | T |
| TCGA-24-2035 | PCDHAC2   | ENST00000289269 | p.S936S  | c.2808C>T | Verified   | CAA | TCC | GGT | 3 | C | T |
| TCGA-24-1470 | PCDHB10   | ENST00000239446 | p.R792*  | c.2374C>T | Verified   | TTC | CGA | AAT | 1 | C | T |
| TCGA-24-2262 | PCDHB11   | ENST00000354757 | p.N555N  | c.1665C>T | Unverified | GCC | AAC | GAC | 3 | C | T |
| TCGA-04-1652 | PCDHB12   | ENST00000239450 | p.R289C  | c.865C>T  | Unverified | ATT | CGC | AAG | 1 | C | T |
| TCGA-04-1652 | PCDHB12   | ENST00000239450 | p.R289C  | c.865C>T  | Unverified | ATT | CGC | AAG | 1 | C | T |
| TCGA-24-1435 | PCDHB12   | ENST00000239450 | p.A677A  | c.2031C>T | Unverified | GCG | GCC | CCG | 3 | C | T |
| TCGA-23-1114 | PCDHB13   | ENST00000341948 | p.R530C  | c.1588C>T | Unverified | TTC | CGC | GTG | 1 | C | T |
| TCGA-13-0916 | PCDHB13   | ENST00000341948 | p.P221L  | c.662C>T  | Verified   | TCT | CCG | CCC | 2 | C | T |
| TCGA-30-1855 | PCDHB13   | ENST00000341948 | p.T626T  | c.1878C>T | Unverified | CGC | ACC | GCC | 3 | C | T |
| TCGA-13-0884 | PCDHB16   | ENST00000361016 | p.N169N  | c.507C>T  | Verified   | CAA | AAC | TAT | 3 | C | T |
| TCGA-24-2267 | PCDHB2    | ENST00000194155 | p.A678V  | c.2033C>T | Verified   | GAG | GCG | GCA | 2 | C | T |
| TCGA-13-0792 | PCDHB5    | ENST00000231134 | p.R789W  | c.2365C>T | Verified   | TTC | CGG | AAT | 1 | C | T |
| TCGA-23-1031 | PCDHGA12  | ENST00000252085 | p.S763L  | c.2288C>T | Unverified | GAC | TCG | CGG | 2 | C | T |
| TCGA-23-1031 | PCDHGA12_ | ENST00000252085 | p.S763L  | c.2288C>T | Unverified | GAC | TCG | CGG | 2 | C | T |
| TCGA-04-1343 | PCDHGA5   | ENST00000518069 | p.R805*  | c.2413C>T | Verified   | CGG | CGA | GTT | 1 | C | T |
| TCGA-24-1470 | PCNT      | ENST00000359568 | p.Q2821* | c.8461C>T | Verified   | CAG | CAG | CTT | 1 | C | T |
| TCGA-04-1337 | PCSK1     | ENST00000311106 | p.L741L  | c.2221C>T | Verified   | CGG | CTG | CTT | 1 | C | T |
| TCGA-13-1501 | PCSK2     | ENST00000262545 | p.R419W  | c.1255C>T | Verified   | AAA | CGG | AAC | 1 | C | T |
| TCGA-13-1501 | PCSK2     | ENST00000262545 | p.R419W  | c.1255C>T | Verified   | AAA | CGG | AAC | 1 | C | T |
| TCGA-20-0991 | PCSK2     | ENST00000262545 | p.T340I  | c.1019C>T | Verified   | AGG | ACT | GCC | 2 | C | T |
| TCGA-13-1512 | PDCD11    | ENST00000369797 | p.P665S  | c.1993C>T | Verified   | ctc | ccc | aca | 1 | C | T |
| TCGA-04-1542 | PDE11A    | ENST00000286063 | p.A341V  | c.1022C>T | Verified   | CAA | GCG | ATA | 2 | C | T |
| TCGA-04-1652 | PDE1C     | ENST00000396184 | p.R112W  | c.334C>T  | Unverified | ACG | CGG | CAG | 1 | C | T |
| TCGA-04-1652 | PDE1C     | ENST00000396184 | p.R112W  | c.334C>T  | Unverified | ACG | CGG | CAG | 1 | C | T |
| TCGA-29-1768 | PDE1C     | ENST00000396184 | p.H132H  | c.396C>T  | Unverified | GTT | CAC | GCA | 3 | C | T |
| TCGA-04-1652 | PDE1C_ENS | ENST00000396191 | p.R112W  | c.334C>T  | Unverified | ACG | CGG | CAG | 1 | C | T |

|              |            |                 |         |                  |            |     |     |     |   |   |   |
|--------------|------------|-----------------|---------|------------------|------------|-----|-----|-----|---|---|---|
| TCGA-04-1652 | PDE1C_ENS  | ENST00000396191 | p.R112W | c.334C>T         | Unverified | ACG | CGG | CAG | 1 | C | T |
| TCGA-29-1768 | PDE1C_ENS  | ENST00000396191 | p.H132H | c.396C>T         | Unverified | GTT | CAC | GCA | 3 | C | T |
| TCGA-04-1652 | PDE1C_ENS  | ENST00000396193 | p.R172W | c.514C>T         | Unverified | ACG | CGG | CAG | 1 | C | T |
| TCGA-04-1652 | PDE1C_ENS  | ENST00000396193 | p.R172W | c.514C>T         | Unverified | ACG | CGG | CAG | 1 | C | T |
| TCGA-29-1768 | PDE1C_ENS  | ENST00000396193 | p.H192H | c.576C>T         | Unverified | GTT | CAC | GCA | 3 | C | T |
| TCGA-24-1844 | PDE2A      | ENST00000334456 | p.R905C | c.2713C>T        | Unverified | ATC | CGC | GGC | 1 | C | T |
| TCGA-13-0919 | PDE4C      | ENST00000355502 | p.P648P | c.1944C>T        | Verified   | AAC | CCC | GAG | 3 | C | T |
| TCGA-24-1422 | PDE6B      | ENST00000255622 | p.?     | c.2269-4_2271del | Unverified | ATT | CCT | ATG | 1 | C | T |
| TCGA-29-1695 | PDGFRA     | ENST00000257290 | p.H920H | c.2760C>T        | Unverified | GAC | CAC | GCT | 3 | C | T |
| TCGA-13-1498 | PDHB       | ENST00000302746 | p.V283V | c.849C>T         | Verified   | AGT | GTC | ATG | 3 | C | T |
| TCGA-23-2077 | PDIA3      | ENST00000300289 | p.A19V  | c.56C>T          | Unverified | GCG | GCC | CGC | 2 | C | T |
| TCGA-04-1343 | PDXP       | ENST00000215904 | p.C221C | c.663C>T         | Verified   | GAG | TGC | ATC | 3 | C | T |
| TCGA-20-1685 | PDZD8      | ENST00000334464 | p.A759V | c.2276C>T        | Unverified | GAA | GCC | CCC | 2 | C | T |
| TCGA-13-1498 | PDZRN3     | NM_015009.1     | p.T612T | c.1836C>T        | Verified   | gac | acc | ttg | 3 | C | T |
| TCGA-04-1367 | PEG3       | ENST00000326441 | p.R193W | c.577C>T         | Verified   | CCG | CGG | GAT | 1 | C | T |
| TCGA-61-2012 | PEPD       | ENST00000244137 | p.G149G | c.447C>T         | Verified   | CGT | GGC | GTC | 3 | C | T |
| TCGA-23-1111 | PER1       | ENST00000317276 | p.R230* | c.688C>T         | Unverified | GGC | CGA | ATC | 1 | C | T |
| TCGA-30-1891 | PER1       | ENST00000317276 | p.Q846* | c.2536C>T        | Unverified | CAC | CAG | AAC | 1 | C | T |
| TCGA-13-1489 | PEX16      | ENST00000241041 | p.P228L | c.683C>T         | Verified   | CGG | CCG | CTG | 2 | C | T |
| TCGA-09-1665 | PEX5       | ENST00000266564 | p.L507L | c.1521C>T        | Verified   | GCC | CTC | AGC | 3 | C | T |
| TCGA-23-1114 | PEX5       | ENST00000266564 | p.T417T | c.1251C>T        | Unverified | GAA | ACC | CTA | 3 | C | T |
| TCGA-13-0885 | PEX6       | ENST00000304611 | p.P697L | c.2090C>T        | Verified   | GCC | CCC | AAG | 2 | C | T |
| TCGA-04-1356 | PFKFB3     | ENST00000379775 | p.Q228* | c.682C>T         | Unverified | GTG | CAG | GAC | 1 | C | T |
| TCGA-24-1469 | PGBD1      | ENST00000259883 | p.I695I | c.2085C>T        | Verified   | ATT | ATC | AGT | 3 | C | T |
| TCGA-23-2077 | PGBD5      | ENST00000321327 | p.Q35*  | c.103C>T         | Verified   | CTG | CAG | CCA | 1 | C | T |
| TCGA-09-2044 | PGLYRP4    | ENST00000359650 | p.R253C | c.757C>T         | Verified   | TGC | CGC | CTG | 1 | C | T |
| TCGA-13-1497 | PGLYRP4    | ENST00000359650 | p.T74M  | c.221C>T         | Verified   | ACC | ACG | CCA | 2 | C | T |
| TCGA-24-1463 | PGM2L1     | ENST00000298198 | p.F352F | c.1056C>T        | Verified   | GTT | TTC | ACA | 3 | C | T |
| TCGA-29-1762 | PHACTR1_EI | ENST00000432934 | p.L248L | c.742C>T         | Unverified | CTA | CTG | CCC | 1 | C | T |
| TCGA-20-0991 | PHACTR2    | ENST00000305766 | p.H198Y | c.592C>T         | Verified   | TCT | CAC | CTG | 1 | C | T |
| TCGA-09-1674 | PHACTR3    | ENST00000371015 | p.R396W | c.1186C>T        | Unverified | CCA | CGG | AAA | 1 | C | T |
| TCGA-25-1326 | PHC1       | ENST00000251757 | p.T320I | c.959C>T         | Unverified | CAA | ACA | GTG | 2 | C | T |
| TCGA-29-1691 | PHF14      | NM_001007157.1  | p.P180L | c.539C>T         | Unverified | gag | cca | aaa | 2 | C | T |
| TCGA-24-0979 | PHF2       | ENST00000359246 | p.T312T | c.936C>T         | Verified   | CAG | ACC | CTC | 3 | C | T |

|              |            |                 |          |            |            |     |     |     |   |   |   |
|--------------|------------|-----------------|----------|------------|------------|-----|-----|-----|---|---|---|
| TCGA-61-1899 | PHF20      | ENST00000374012 | p.P342S  | c.1024C>T  | Unverified | GAT | CCT | GAC | 1 | C | T |
| TCGA-13-1481 | PHKA1      | ENST00000373542 | p.R802W  | c.2404C>T  | Verified   | GAA | CGG | AGT | 1 | C | T |
| TCGA-23-1022 | PIAS1      | ENST00000249636 | p.D159D  | c.477C>T   | Verified   | tca | gac | aac | 3 | C | T |
| TCGA-24-1849 | PIGO       | ENST00000378617 | p.Q389*  | c.1165C>T  | Unverified | ctt | caa | gct | 1 | C | T |
| TCGA-13-0755 | PIH1D2     | ENST00000280350 | p.T307M  | c.920C>T   | Verified   | TCC | ACG | CTA | 2 | C | T |
| TCGA-25-1313 | PIK3C2G    | ENST00000433979 | p.Y1017Y | c.3051C>T  | Verified   | TTC | TAC | TCC | 3 | C | T |
| TCGA-13-0890 | PIK3CA     | NM_006218.1     | p.H510H  | c.1530C>T  | Verified   | tcc | cac | gca | 3 | C | T |
| TCGA-24-1844 | PIK3R2     | ENST00000222254 | p.D400D  | c.1200C>T  | Unverified | GTG | GAC | CTC | 3 | C | T |
| TCGA-13-0923 | PIKFYVE    | ENST00000264380 | p.R1984* | c.5950C>T  | Verified   | GTT | CGA | GAC | 1 | C | T |
| TCGA-13-0887 | PITPNM3    | ENST00000262483 | p.R624W  | c.1870C>T  | Verified   | AAG | CGG | ACT | 1 | C | T |
| TCGA-61-2012 | PKP2       | ENST00000070846 | p.H213Y  | c.637C>T   | Verified   | CGC | CAC | TTT | 1 | C | T |
| TCGA-23-1111 | PKP4       | ENST00000389759 | p.R53*   | c.157C>T   | Unverified | ACC | CGA | GAA | 1 | C | T |
| TCGA-25-2392 | PLA2G12B   | ENST00000373032 | p.G104G  | c.312C>T   | Verified   | TTG | GGC | ATT | 3 | C | T |
| TCGA-04-1338 | PLA2G15    | ENST00000219345 | p.Y72Y   | c.216C>T   | Verified   | AGC | TAC | TTC | 3 | C | T |
| TCGA-24-2289 | PLA2G4C    | ENST00000413144 | p.Y486Y  | c.1458C>T  | Unverified | ACA | TAC | GAC | 3 | C | T |
| TCGA-61-1733 | PLA2R1     | ENST00000283243 | p.H240H  | c.720C>T   | Unverified | TCA | CAC | ATT | 3 | C | T |
| TCGA-61-1733 | PLA2R1     | ENST00000283243 | p.H240H  | c.720C>T   | Unverified | TCA | CAC | ATT | 3 | C | T |
| TCGA-13-0884 | PLAGL2     | ENST00000246229 | p.A80V   | c.239C>T   | Verified   | ttt | gct | tcc | 2 | C | T |
| TCGA-29-1785 | PLBD2      | ENST00000280800 | p.A437V  | c.1310C>T  | Unverified | AAT | GCC | AGT | 2 | C | T |
| TCGA-29-1785 | PLBD2      | ENST00000280800 | p.A437V  | c.1310C>T  | Unverified | AAT | GCC | AGT | 2 | C | T |
| TCGA-61-1738 | PLCB3      | ENST00000279230 | p.H865H  | c.2595C>T  | Unverified | AAG | CAC | GTC | 3 | C | T |
| TCGA-61-1738 | PLCB3      | ENST00000279230 | p.H865H  | c.2595C>T  | Unverified | AAG | CAC | GTC | 3 | C | T |
| TCGA-24-2267 | PLCE1      | ENST00000260766 | p.D257D  | c.771C>T   | Verified   | TGT | GAC | ACC | 3 | C | T |
| TCGA-61-1907 | PLCH1      | ENST00000334686 | p.R573*  | c.1717C>T  | Unverified | CGC | CGA | AGG | 1 | C | T |
| TCGA-29-1785 | PLCH1      | ENST00000334686 | p.T1620M | c.4859C>T  | Unverified | TGC | ACG | GCT | 2 | C | T |
| TCGA-29-1785 | PLCH1      | ENST00000334686 | p.T1620M | c.4859C>T  | Unverified | TGC | ACG | GCT | 2 | C | T |
| TCGA-61-1907 | PLCH1_ENST | ENST00000340059 | p.R591*  | c.1771C>T  | Unverified | CGC | CGA | AGG | 1 | C | T |
| TCGA-29-1785 | PLCH1_ENST | ENST00000340059 | p.T1658M | c.4973C>T  | Unverified | TGC | ACG | GCT | 2 | C | T |
| TCGA-29-1785 | PLCH1_ENST | ENST00000340059 | p.T1658M | c.4973C>T  | Unverified | TGC | ACG | GCT | 2 | C | T |
| TCGA-24-1849 | PLCL1      | NM_006226.1     | p.T248I  | c.743C>T   | Unverified | gtc | acc | cat | 2 | C | T |
| TCGA-24-1849 | PLCL1_ENST | ENST00000428675 | p.T346I  | c.1037C>T  | Unverified | GTC | ACC | CAT | 2 | C | T |
| TCGA-09-2050 | PLD2_ENST  | ENST00000263088 | p.D13D   | c.39C>T    | Verified   | GGG | GAC | GAA | 3 | C | T |
| TCGA-13-0906 | PLD3       | ENST00000359274 | p.F411F  | c.1233C>T  | Verified   | ATT | TTC | CTG | 3 | C | T |
| TCGA-23-1116 | PLEC       | ENST00000322810 | p.P3956S | c.11866C>T | Unverified | CTT | CCC | CTG | 1 | C | T |

|              |            |                 |          |           |            |     |     |     |   |   |   |
|--------------|------------|-----------------|----------|-----------|------------|-----|-----|-----|---|---|---|
| TCGA-24-1849 | PLEC       | ENST00000322810 | p.A2242V | c.6725C>T | Unverified | GCG | GCG | CAG | 2 | C | T |
| TCGA-24-1849 | PLEC_ENST0 | ENST00000345136 | p.A2105V | c.6314C>T | Unverified | GCG | GCG | CAG | 2 | C | T |
| TCGA-24-1849 | PLEC_ENST0 | ENST00000436759 | p.A2132V | c.6395C>T | Unverified | GCG | GCG | CAG | 2 | C | T |
| TCGA-24-1616 | PLEKHG1    | ENST00000358517 | p.P150S  | c.448C>T  | Verified   | CTT | CCC | CTG | 1 | C | T |
| TCGA-25-2400 | PLEKHG4    | ENST00000360461 | p.L190L  | c.568C>T  | Unverified | CTG | CTG | GCC | 1 | C | T |
| TCGA-25-1313 | PLEKHG4    | ENST00000360461 | p.S11F   | c.32C>T   | Unverified | GAG | TCC | CCA | 2 | C | T |
| TCGA-24-2290 | PLOD1      | ENST00000196061 | p.L311L  | c.933C>T  | Verified   | CGG | CTC | CAC | 3 | C | T |
| TCGA-24-2290 | PLOD1      | ENST00000196061 | p.L311L  | c.933C>T  | Verified   | CGG | CTC | CAC | 3 | C | T |
| TCGA-29-1761 | PLOD3      | ENST00000223127 | p.Q349*  | c.1045C>T | Unverified | CCG | CAG | CTC | 1 | C | T |
| TCGA-36-1577 | PLVAP      | ENST00000252590 | p.R107R  | c.321C>T  | Unverified | CGC | CGC | GAC | 3 | C | T |
| TCGA-61-2012 | PLXNA4_EN  | ENST00000321063 | p.T1777I | c.5330C>T | Verified   | CAG | ACC | TTC | 2 | C | T |
| TCGA-24-1850 | PLXNC1     | ENST00000258526 | p.S691L  | c.2072C>T | Unverified | GCA | TCG | AAC | 2 | C | T |
| TCGA-24-2288 | PMPCA      | ENST00000371717 | p.P174L  | c.521C>T  | Unverified | CAG | CCC | CGG | 2 | C | T |
| TCGA-13-1488 | PNMA1      | ENST00000316836 | p.A210A  | c.630C>T  | Verified   | CCC | GCC | GCT | 3 | C | T |
| TCGA-10-0930 | PNPLA6     | ENST00000221249 | p.D809D  | c.2427C>T | Verified   | ACG | GAC | GCC | 3 | C | T |
| TCGA-10-0930 | PNPLA6     | ENST00000221249 | p.D809D  | c.2427C>T | Verified   | ACG | GAC | GCC | 3 | C | T |
| TCGA-24-1417 | POGK       | ENST00000367875 | p.P542L  | c.1625C>T | Verified   | AAG | CCA | CCC | 2 | C | T |
| TCGA-24-2290 | POLE       | ENST00000320574 | p.V1394V | c.4182C>T | Verified   | ATG | GTC | TAC | 3 | C | T |
| TCGA-24-2290 | POLE       | ENST00000320574 | p.V1394V | c.4182C>T | Verified   | ATG | GTC | TAC | 3 | C | T |
| TCGA-23-1124 | POLM       | ENST00000242248 | p.S64S   | c.192C>T  | Verified   | agc | tcc | gaa | 3 | C | T |
| TCGA-24-1844 | POLR1A     | ENST00000263857 | p.R1113C | c.3337C>T | Unverified | GGC | CGC | AGC | 1 | C | T |
| TCGA-24-2024 | POLR1A     | ENST00000263857 | p.S1677S | c.5031C>T | Verified   | ACC | AGC | TTC | 3 | C | T |
| TCGA-30-1718 | POLR2A_EN  | ENST00000412468 | p.V112V  | c.336C>T  | Unverified | AAC | GTC | CTC | 3 | C | T |
| TCGA-29-1783 | POLR3B     | ENST00000228347 | p.P1006P | c.3018C>T | Unverified | GGC | CCC | GTG | 3 | C | T |
| TCGA-24-1474 | POP5       | ENST00000357500 | p.P18L   | c.53C>T   | Unverified | GAC | CCC | CGC | 2 | C | T |
| TCGA-20-0991 | POSTN      | ENST00000379747 | p.N445N  | c.1335C>T | Verified   | TAC | AAC | GGG | 3 | C | T |
| TCGA-13-1488 | POTEF      | ENST00000409914 | p.Q759*  | c.2275C>T | Unverified | GCC | CAG | AGC | 1 | C | T |
| TCGA-24-2035 | POU2F2     | ENST00000389341 | p.R280W  | c.838C>T  | Verified   | ggc | cgg | aga | 1 | C | T |
| TCGA-04-1638 | PPAN-P2RY1 | ENST00000393796 | p.R523C  | c.1567C>T | Unverified | TGC | CGC | CTG | 1 | C | T |
| TCGA-29-1693 | PPAN-P2RY1 | ENST00000393796 | p.A733A  | c.2199C>T | Unverified | CTG | GCC | TTC | 3 | C | T |
| TCGA-13-0795 | PPARD      | ENST00000360694 | p.H287Y  | c.859C>T  | Verified   | gtg | cac | gag | 1 | C | T |
| TCGA-04-1652 | PPARGC1A   | ENST00000264867 | p.S359S  | c.1077C>T | Unverified | ctc | agc | aag | 3 | C | T |
| TCGA-04-1652 | PPARGC1A   | ENST00000264867 | p.S359S  | c.1077C>T | Unverified | ctc | agc | aag | 3 | C | T |
| TCGA-61-2012 | PPARGC1B   | ENST00000309241 | p.D120D  | c.360C>T  | Unverified | GGA | GAC | GCT | 3 | C | T |

|              |             |                 |          |           |            |     |     |     |   |   |   |
|--------------|-------------|-----------------|----------|-----------|------------|-----|-----|-----|---|---|---|
| TCGA-23-1123 | PPFIBP2     | ENST00000299492 | p.D449D  | c.1347C>T | Verified   | cct | gac | gcc | 3 | C | T |
| TCGA-23-1123 | PPFIBP2     | ENST00000299492 | p.D449D  | c.1347C>T | Verified   | cct | gac | gcc | 3 | C | T |
| TCGA-13-0791 | PPIL1       | ENST00000373699 | p.A3V    | c.8C>T    | Verified   | GCG | GCA | ATT | 2 | C | T |
| TCGA-61-2009 | PPOX        | ENST00000352210 | p.N476N  | c.1428C>T | Verified   | CCT | AAC | AGC | 3 | C | T |
| TCGA-04-1649 | PPP1R21     | ENST00000294952 | p.I550I  | c.1650C>T | Unverified | CGC | ATC | CTT | 3 | C | T |
| TCGA-61-1910 | PPP1R7      | ENST00000407025 | p.N218N  | c.654C>T  | Unverified | aaa | aac | aaa | 3 | C | T |
| TCGA-20-1683 | PPP2R2B     | ENST00000336640 | p.R329C  | c.985C>T  | Unverified | ctc | cgc | agc | 1 | C | T |
| TCGA-20-1683 | PPP2R2B_ENS | ENST00000394409 | p.R384C  | c.1150C>T | Unverified | CTC | CGC | AGC | 1 | C | T |
| TCGA-20-1683 | PPP2R2B_ENS | ENST00000394413 | p.R326C  | c.976C>T  | Unverified | CTC | CGC | AGC | 1 | C | T |
| TCGA-20-1683 | PPP2R2B_ENS | ENST00000508545 | p.R315C  | c.943C>T  | Unverified | CTC | CGC | AGC | 1 | C | T |
| TCGA-23-1124 | PPP3CC      | ENST00000240139 | p.P305S  | c.913C>T  | Verified   | gcc | ccc | aat | 1 | C | T |
| TCGA-25-1313 | PPP6C       | ENST00000373547 | p.L149L  | c.447C>T  | Verified   | atg | ctc | aca | 3 | C | T |
| TCGA-24-1431 | PPP6R2      | ENST00000359139 | p.P420L  | c.1259C>T | Unverified | CCT | CCG | CAT | 2 | C | T |
| TCGA-61-1738 | PQLC1       | ENST00000397778 | p.T181T  | c.543C>T  | Unverified | CTG | ACC | GAA | 3 | C | T |
| TCGA-61-1738 | PQLC1       | ENST00000397778 | p.T181T  | c.543C>T  | Unverified | CTG | ACC | GAA | 3 | C | T |
| TCGA-61-1737 | PRAMEF1     | ENST00000332296 | p.H324Y  | c.970C>T  | Unverified | AAG | CAT | CTG | 1 | C | T |
| TCGA-25-2042 | PRDM16      | ENST00000270722 | p.G651G  | c.1953C>T | Verified   | GGG | GGC | GGC | 3 | C | T |
| TCGA-29-1762 | PRDM9       | ENST00000296682 | p.R619W  | c.1855C>T | Unverified | AGC | CGG | CAG | 1 | C | T |
| TCGA-23-1122 | PRELP       | ENST00000343110 | p.A168V  | c.503C>T  | Verified   | TCG | GCC | CTG | 2 | C | T |
| TCGA-04-1343 | PREP        | ENST00000369110 | p.P482P  | c.1446C>T | Verified   | ACA | CCC | AAC | 3 | C | T |
| TCGA-20-1686 | PREX1       | ENST00000371941 | p.A222V  | c.665C>T  | Unverified | CCC | GCG | GTC | 2 | C | T |
| TCGA-20-1686 | PREX1_ENS   | ENST00000396220 | p.A222V  | c.665C>T  | Unverified | CCC | GCG | GTC | 2 | C | T |
| TCGA-04-1638 | PRIC285     | ENST00000467148 | p.D1028D | c.3084C>T | Unverified | GGA | GAC | GCA | 3 | C | T |
| TCGA-24-1844 | PRKCA       | ENST00000413366 | p.R632*  | c.1894C>T | Unverified | ACA | CGA | GGA | 1 | C | T |
| TCGA-24-1844 | PRKCB       | ENST00000303531 | p.L575L  | c.1723C>T | Unverified | GGG | CTG | ATG | 1 | C | T |
| TCGA-24-1844 | PRKCB_ENS   | ENST00000303531 | p.L575L  | c.1723C>T | Unverified | GGG | CTG | ATG | 1 | C | T |
| TCGA-24-1844 | PRKCB_ENS   | ENST00000321728 | p.L575L  | c.1723C>T | Unverified | GGG | CTG | ATG | 1 | C | T |
| TCGA-04-1638 | PRKCE       | ENST00000306156 | p.V208V  | c.624C>T  | Unverified | GTG | GTC | CAC | 3 | C | T |
| TCGA-23-1031 | PRKCSH      | ENST00000252455 | p.L25L   | c.75C>T   | Unverified | TCC | CTC | ACC | 3 | C | T |
| TCGA-36-1577 | PRKD1       | ENST00000331968 | p.P270L  | c.809C>T  | Verified   | GTG | CCG | CAC | 2 | C | T |
| TCGA-36-1577 | PRKD1_ENS   | ENST00000331968 | p.P270L  | c.809C>T  | Verified   | GTG | CCG | CAC | 2 | C | T |
| TCGA-24-1604 | PRMT2       | ENST00000397637 | p.G74G   | c.222C>T  | Verified   | GCG | GGC | TGC | 3 | C | T |
| TCGA-13-1488 | PRODH2      | ENST00000301175 | p.R525W  | c.1573C>T | Verified   | TGG | CGG | CGG | 1 | C | T |
| TCGA-61-1740 | PROKR1      | ENST00000303786 | p.I305I  | c.915C>T  | Unverified | ACC | ATC | GTG | 3 | C | T |

|              |            |                 |          |           |            |     |     |     |   |   |   |
|--------------|------------|-----------------|----------|-----------|------------|-----|-----|-----|---|---|---|
| TCGA-25-1313 | PROKR2     | ENST00000217270 | p.R85C   | c.253C>T  | Verified   | TTG | CGC | AAC | 1 | C | T |
| TCGA-30-1891 | PROKR2     | ENST00000217270 | p.S98S   | c.294C>T  | Unverified | ATC | TCC | GAC | 3 | C | T |
| TCGA-13-1509 | PRPF31     | ENST00000321030 | p.I279I  | c.837C>T  | Verified   | GAC | ATC | GTG | 3 | C | T |
| TCGA-04-1542 | PRPF4B_ENS | ENST00000337659 | p.R183*  | c.547C>T  | Verified   | AAA | CGA | AGT | 1 | C | T |
| TCGA-04-1542 | PRPS1L1_EN | ENST00000506618 | p.R49C   | c.145C>T  | Verified   | ATG | CTC | TCT | 1 | C | T |
| TCGA-29-1783 | PRR21      | ENST00000408934 | p.R53W   | c.157C>T  | Unverified | CCA | CGG | CTC | 1 | C | T |
| TCGA-09-1674 | PRR5-ARHG, | NM_181334.1     | p.P149L  | c.446C>T  | Unverified | cac | ccc | acc | 2 | C | T |
| TCGA-61-1910 | PRRC2A     | ENST00000376033 | p.R904C  | c.2710C>T | Unverified | GCC | CGC | GGA | 1 | C | T |
| TCGA-13-0913 | PRRC2A     | ENST00000376033 | p.R1831R | c.5493C>T | Verified   | CAG | CGC | CTG | 3 | C | T |
| TCGA-30-1718 | PRSS23     | ENST00000280258 | p.T99M   | c.296C>T  | Unverified | GAG | ACG | CAG | 2 | C | T |
| TCGA-13-0762 | PRSS3      | ENST00000379405 | p.S200F  | c.599C>T  | Unverified | GAC | TCT | GGT | 2 | C | T |
| TCGA-13-0762 | PRSS3      | ENST00000379405 | p.S200F  | c.599C>T  | Unverified | GAC | TCT | GGT | 2 | C | T |
| TCGA-04-1361 | PSAP       | ENST00000394936 | p.P294S  | c.880C>T  | Verified   | ATC | CCT | GCC | 1 | C | T |
| TCGA-04-1361 | PSAP       | ENST00000394936 | p.P294S  | c.880C>T  | Verified   | ATC | CCT | GCC | 1 | C | T |
| TCGA-13-1496 | PSD4       | ENST00000245796 | p.R594C  | c.1780C>T | Verified   | TCA | CGC | CTC | 1 | C | T |
| TCGA-29-1763 | PSD4       | ENST00000245796 | p.D82D   | c.246C>T  | Unverified | CAG | GAC | GGG | 3 | C | T |
| TCGA-09-0369 | PSENE      | ENST00000222266 | p.R82W   | c.244C>T  | Verified   | tac | cgg | ccc | 1 | C | T |
| TCGA-09-0369 | PSENE      | ENST00000222266 | p.R82W   | c.244C>T  | Verified   | tac | cgg | ccc | 1 | C | T |
| TCGA-24-1844 | PSG3       | ENST00000327495 | p.L4F    | c.10C>T   | Unverified | CCC | CTC | TCA | 1 | C | T |
| TCGA-23-1120 | PSMB6      | ENST00000270586 | p.L210L  | c.628C>T  | Verified   | CGC | CTG | GCA | 1 | C | T |
| TCGA-13-0760 | PSMC3      | ENST00000298852 | p.Q184*  | c.550C>T  | Verified   | GAG | CAA | TAC | 1 | C | T |
| TCGA-24-2289 | PSMC5      | ENST00000310144 | p.A238V  | c.713C>T  | Unverified | ATG | GCA | CGG | 2 | C | T |
| TCGA-30-1718 | PSME4      | NM_014614.1     | p.S861F  | c.2582C>T | Unverified | tta | tct | aca | 2 | C | T |
| TCGA-30-1718 | PSME4_ENS  | ENST00000404125 | p.S975F  | c.2924C>T | Unverified | TTA | TCT | ACA | 2 | C | T |
| TCGA-61-1915 | PSMF1      | ENST00000335877 | p.R180W  | c.538C>T  | Unverified | AGT | CGG | CAG | 1 | C | T |
| TCGA-25-2400 | PSPN       | ENST00000245810 | p.A32A   | c.96C>T   | Unverified | GTG | GCC | GAT | 3 | C | T |
| TCGA-20-1683 | PTBP2      | ENST00000426398 | p.P57S   | c.169C>T  | Unverified | GCT | CCT | TCT | 1 | C | T |
| TCGA-29-1781 | PTCH1      | ENST00000331920 | p.P1441S | c.4321C>T | Unverified | AGG | CCC | CGG | 1 | C | T |
| TCGA-29-1781 | PTCH1_ENS  | ENST00000331920 | p.P1441S | c.4321C>T | Unverified | AGG | CCC | CGG | 1 | C | T |
| TCGA-29-1781 | PTCH1_ENS  | ENST00000375274 | p.P1440S | c.4318C>T | Unverified | AGG | CCC | CGG | 1 | C | T |
| TCGA-29-1781 | PTCH1_ENS  | ENST00000375274 | p.P1440S | c.4318C>T | Unverified | AGG | CCC | CGG | 1 | C | T |
| TCGA-23-2078 | PTCHD2     | XM_052561.7     | p.R335C  | c.1003C>T | Verified   | cag | cgt | ttc | 1 | C | T |
| TCGA-24-1843 | PTCHD2     | XM_052561.7     | p.R631C  | c.1891C>T | Unverified | gac | cgc | tgg | 1 | C | T |
| TCGA-61-1740 | PTEN       | ENST00000371953 | p.H123Y  | c.367C>T  | Unverified | att | cac | tgt | 1 | C | T |



|              |           |                 |          |           |            |     |     |     |   |   |   |
|--------------|-----------|-----------------|----------|-----------|------------|-----|-----|-----|---|---|---|
| TCGA-25-2392 | PTGFR     | ENST00000370756 | p.A253V  | c.758C>T  | Verified   | CTG | GCG | ATA | 2 | C | T |
| TCGA-25-2392 | PTGFR_ENS | ENST00000370758 | p.A253V  | c.758C>T  | Verified   | CTG | GCG | ATA | 2 | C | T |
| TCGA-29-2427 | PTGIR     | ENST00000291294 | p.F146F  | c.438C>T  | Unverified | GCC | TTC | TGC | 3 | C | T |
| TCGA-29-1698 | PTGS1_ENS | ENST00000362012 | p.P582L  | c.1745C>T | Unverified | GTG | CCG | GAT | 2 | C | T |
| TCGA-24-2035 | PTK2      | NM_005607       | p.R448*  | c.1342C>T | Verified   | gga | cga | tgt | 1 | C | T |
| TCGA-61-1907 | PTK6      | ENST00000217185 | p.Y251Y  | c.753C>T  | Unverified | ctg | tac | gcc | 3 | C | T |
| TCGA-23-1022 | PTPN13    | ENST00000436978 | p.T673I  | c.2018C>T | Verified   | CAT | ACT | CTG | 2 | C | T |
| TCGA-13-0807 | PTPN18    | ENST00000175756 | p.R331C  | c.991C>T  | Verified   | ccc | cgc | cca | 1 | C | T |
| TCGA-61-1915 | PTPN23    | ENST00000265562 | p.F510F  | c.1530C>T | Unverified | TCC | TTC | ACC | 3 | C | T |
| TCGA-13-1499 | PTPN3     | ENST00000394831 | p.R371C  | c.1111C>T | Verified   | TCT | CGT | TCC | 1 | C | T |
| TCGA-24-2280 | PTPRD     | ENST00000381196 | p.P974S  | c.2920C>T | Unverified | GTT | CCA | GCT | 1 | C | T |
| TCGA-25-1326 | PTPRG     | ENST00000474889 | p.P570L  | c.1709C>T | Unverified | TCA | CCA | ACC | 2 | C | T |
| TCGA-04-1655 | PTPRN     | ENST00000295718 | p.V443V  | c.1329C>T | Unverified | cct | gtc | ctg | 3 | C | T |
| TCGA-24-1849 | PTPRN2    | NM_002847.2     | p.A617V  | c.1850C>T | Unverified | atc | gcg | ctc | 2 | C | T |
| TCGA-61-1899 | PTPRN2    | NM_002847.2     | p.A467A  | c.1401C>T | Unverified | ggg | gcc | gct | 3 | C | T |
| TCGA-24-2280 | PTPRS     | ENST00000357368 | p.R188*  | c.562C>T  | Unverified | CTG | CGA | TCA | 1 | C | T |
| TCGA-13-1507 | PTPRT     | NM_133170.2     | p.A149V  | c.446C>T  | Verified   | aag | gca | gag | 2 | C | T |
| TCGA-61-2113 | PURA      | ENST00000331327 | p.L159F  | c.475C>T  | Unverified | GAT | CTC | AAG | 1 | C | T |
| TCGA-29-1766 | PWP2      | ENST00000291576 | p.T791I  | c.2372C>T | Unverified | GTC | ACC | TCC | 2 | C | T |
| TCGA-61-2094 | PXDN      | ENST00000252804 | p.Y118Y  | c.354C>T  | Unverified | CTG | TAC | AAG | 3 | C | T |
| TCGA-61-1910 | PYGL      | ENST00000216392 | p.D51D   | c.153C>T  | Unverified | CGC | GAC | TAC | 3 | C | T |
| TCGA-20-1686 | PYGM      | ENST00000164139 | p.R570W  | c.1708C>T | Unverified | AAG | CGG | ATT | 1 | C | T |
| TCGA-09-0369 | PZP       | ENST00000261336 | p.T89I   | c.266C>T  | Verified   | TTC | ACT | CTC | 2 | C | T |
| TCGA-09-0369 | PZP       | ENST00000261336 | p.T89I   | c.266C>T  | Verified   | TTC | ACT | CTC | 2 | C | T |
| TCGA-04-1362 | PZP       | ENST00000261336 | p.V130V  | c.390C>T  | Verified   | TTT | GTC | CAG | 3 | C | T |
| TCGA-29-1784 | Q5TBE2_HU | ENST00000315260 | p.Q79*   | c.235C>T  | Unverified | ATT | CAA | GAT | 1 | C | T |
| TCGA-61-2102 | Q6YL47_HU | ENST00000322367 | p.N1004N | c.3012C>T | Verified   | ATC | AAC | CTC | 3 | C | T |
| TCGA-23-1111 | Q7Z5Z2_HU | ENST00000340697 | p.S20L   | c.59C>T   | Unverified | TCT | TCG | ACA | 2 | C | T |
| TCGA-13-0887 | Q8N0W1_H  | ENST00000330155 | p.P165L  | c.494C>T  | Verified   | CTG | CCC | TTC | 2 | C | T |
| TCGA-29-1691 | Q8NFX8_HU | ENST00000330652 | p.P100L  | c.299C>T  | Unverified | TTG | CCC | ACA | 2 | C | T |
| TCGA-10-0930 | Q8NGM6_H  | ENST00000316506 | p.H99H   | c.297C>T  | Verified   | GTC | CAC | GCT | 3 | C | T |
| TCGA-10-0930 | Q8NGM6_H  | ENST00000316506 | p.H99H   | c.297C>T  | Verified   | GTC | CAC | GCT | 3 | C | T |
| TCGA-24-1847 | Q8NH77_HL | ENST00000316517 | p.F115F  | c.345C>T  | Unverified | ATC | TTC | CTC | 3 | C | T |
| TCGA-23-2078 | RAB11FIP1 | ENST00000330843 | p.V897V  | c.2691C>T | Verified   | GAA | GTC | CCC | 3 | C | T |

|              |           |                 |          |           |            |     |     |     |   |   |   |
|--------------|-----------|-----------------|----------|-----------|------------|-----|-----|-----|---|---|---|
| TCGA-29-1770 | RAB11FIP5 | ENST00000258098 | p.P433L  | c.1298C>T | Unverified | AAG | CCA | GTC | 2 | C | T |
| TCGA-04-1342 | RAB28     | ENST00000288723 | p.R146W  | c.436C>T  | Verified   | TTA | CGG | TTT | 1 | C | T |
| TCGA-24-2267 | RAB3D     | ENST00000222120 | p.D156D  | c.468C>T  | Verified   | gac | gac | ctt | 3 | C | T |
| TCGA-24-1463 | RAB3GAP1  | ENST00000264158 | p.L963L  | c.2889C>T | Verified   | GTT | CTC | ACC | 3 | C | T |
| TCGA-20-1683 | RAB3IL1   | ENST00000394836 | p.R316W  | c.946C>T  | Unverified | ATC | CGG | CTC | 1 | C | T |
| TCGA-13-0795 | RAB40AL   | ENST00000218249 | p.T70M   | c.209C>T  | Verified   | GAT | ACG | TCG | 2 | C | T |
| TCGA-61-1915 | RAB40AL   | ENST00000218249 | p.Y11Y   | c.33C>T   | Unverified | GCC | TAC | GAC | 3 | C | T |
| TCGA-29-1761 | RAB4B     | NM_016154.2     | p.A171A  | c.513C>T  | Unverified | gag | gcc | tcc | 3 | C | T |
| TCGA-24-1431 | RAB9A     | ENST00000464506 | p.A138V  | c.413C>T  | Verified   | gaa | gcc | caa | 2 | C | T |
| TCGA-23-1110 | RABEP2    | ENST00000358201 | p.R322W  | c.964C>T  | Verified   | AGA | CGG | AGC | 1 | C | T |
| TCGA-13-0885 | RABGAP1   | NM_012197.2     | p.L144L  | c.432C>T  | Verified   | atc | ctc | ttc | 3 | C | T |
| TCGA-24-1843 | RABIF     | ENST00000367262 | p.L65L   | c.195C>T  | Unverified | ctc | ctc | cag | 3 | C | T |
| TCGA-20-1685 | RAD51AP2  | ENST00000399080 | p.P1122L | c.3365C>T | Unverified | CGA | CCG | CTT | 2 | C | T |
| TCGA-29-1691 | RAD54L    | ENST00000442598 | p.P269S  | c.805C>T  | Unverified | TCT | CCC | ATC | 1 | C | T |
| TCGA-24-1847 | RALGAPA2  | ENST00000202677 | p.A1650V | c.4949C>T | Unverified | ATC | GCA | GTG | 2 | C | T |
| TCGA-24-1847 | RALGAPA2_ | ENST00000202677 | p.A1650V | c.4949C>T | Unverified | ATC | GCA | GTG | 2 | C | T |
| TCGA-61-1914 | RAMP3     | ENST00000242249 | p.P114L  | c.341C>T  | Unverified | GAC | CCC | CCA | 2 | C | T |
| TCGA-04-1638 | RANBP2    | ENST00000283195 | p.P512L  | c.1535C>T | Unverified | CAG | CCG | TTA | 2 | C | T |
| TCGA-04-1638 | RANBP2_EN | ENST00000283195 | p.P512L  | c.1535C>T | Unverified | CAG | CCG | TTA | 2 | C | T |
| TCGA-24-2280 | RAPGEF2   | ENST00000264431 | p.T923I  | c.2768C>T | Unverified | AGG | ACT | CGG | 2 | C | T |
| TCGA-24-1850 | RAPGEFL1  | ENST00000264644 | p.R92C   | c.274C>T  | Unverified | ttc | cgc | cgg | 1 | C | T |
| TCGA-23-1122 | RAPSN     | ENST00000298854 | p.L247L  | c.741C>T  | Unverified | GCG | CTC | TGC | 3 | C | T |
| TCGA-29-1785 | RARRES3   | ENST00000255688 | p.I92I   | c.276C>T  | Unverified | GTG | ATC | ATC | 3 | C | T |
| TCGA-29-1785 | RARRES3   | ENST00000255688 | p.I92I   | c.276C>T  | Unverified | GTG | ATC | ATC | 3 | C | T |
| TCGA-24-1845 | RASGRF1   | ENST00000419573 | p.L182F  | c.544C>T  | Unverified | ctg | ctc | aag | 1 | C | T |
| TCGA-24-2280 | RASGRF1   | ENST00000419573 | p.P877S  | c.2629C>T | Unverified | ttc | cca | ctc | 1 | C | T |
| TCGA-30-1856 | RASGRF1   | ENST00000419573 | p.R161W  | c.481C>T  | Unverified | ctt | cgg | cag | 1 | C | T |
| TCGA-24-1563 | RASGRP1   | ENST00000310803 | p.S314L  | c.941C>T  | Verified   | AGT | TCG | CAT | 2 | C | T |
| TCGA-61-2095 | RASL11B   | ENST00000248706 | p.P211L  | c.632C>T  | Unverified | ACA | CCC | GAG | 2 | C | T |
| TCGA-29-1761 | RASSF2    | ENST00000379400 | p.R245*  | c.733C>T  | Unverified | gcc | cga | atc | 1 | C | T |
| TCGA-29-1691 | RB1       | ENST00000267163 | p.Q575*  | c.1723C>T | Unverified | AAA | CAA | TCA | 1 | C | T |
| TCGA-09-1665 | RB1       | ENST00000267163 | p.A264V  | c.791C>T  | Verified   | ATA | GCA | AAA | 2 | C | T |
| TCGA-29-1691 | RB1_ENSTO | ENST00000267163 | p.Q575*  | c.1723C>T | Unverified | AAA | CAA | TCA | 1 | C | T |
| TCGA-04-1530 | RBBP6     | ENST00000319715 | p.P602S  | c.1804C>T | Unverified | cct | cca | ggg | 1 | C | T |

|              |            |                 |          |           |            |     |     |     |   |   |   |
|--------------|------------|-----------------|----------|-----------|------------|-----|-----|-----|---|---|---|
| TCGA-61-1733 | RBBP6      | ENST00000319715 | p.N1394N | c.4182C>T | Unverified | aaa | aac | tct | 3 | C | T |
| TCGA-61-1733 | RBBP6      | ENST00000319715 | p.N1394N | c.4182C>T | Unverified | aaa | aac | tct | 3 | C | T |
| TCGA-25-2398 | RBL2       | ENST00000262133 | p.T742M  | c.2225C>T | Unverified | CAA | ACG | GTA | 2 | C | T |
| TCGA-24-2289 | RBM22      | ENST00000199814 | p.Q13*   | c.37C>T   | Unverified | agg | cag | aac | 1 | C | T |
| TCGA-24-2262 | RBM41      | ENST00000372479 | p.G351G  | c.1053C>T | Verified   | AGG | GGC | CAG | 3 | C | T |
| TCGA-20-0991 | RBM45      | ENST00000286070 | p.l146l  | c.438C>T  | Unverified | GAT | ATC | GAG | 3 | C | T |
| TCGA-24-1845 | RC3H2      | ENST00000373670 | p.L321L  | c.961C>T  | Unverified | AAG | CTA | CAG | 1 | C | T |
| TCGA-24-1845 | RC3H2_ENS  | ENST00000335387 | p.L321L  | c.961C>T  | Unverified | AAG | CTA | CAG | 1 | C | T |
| TCGA-61-2113 | RCBTB2     | ENST00000344532 | p.H317Y  | c.949C>T  | Verified   | tgt | cac | tcc | 1 | C | T |
| TCGA-09-1665 | RCBTB2     | ENST00000344532 | p.V228V  | c.684C>T  | Verified   | tat | gtc | tgg | 3 | C | T |
| TCGA-13-0887 | RCN3       | ENST00000270645 | p.l106l  | c.318C>T  | Verified   | TGG | ATC | GCG | 3 | C | T |
| TCGA-61-1740 | RCOR2      | ENST00000301459 | p.P217S  | c.649C>T  | Unverified | GAG | CCC | GAT | 1 | C | T |
| TCGA-61-1895 | RECK       | ENST00000377966 | p.Q645*  | c.1933C>T | Unverified | GGG | CAG | AAT | 1 | C | T |
| TCGA-13-1498 | REG4       | ENST00000354219 | p.R157*  | c.469C>T  | Verified   | TAC | CGA | CCA | 1 | C | T |
| TCGA-25-1313 | RET        | ENST00000355710 | p.N437N  | c.1311C>T | Unverified | atc | aac | gtc | 3 | C | T |
| TCGA-23-1110 | RFTN1      | ENST00000334133 | p.R448*  | c.1342C>T | Verified   | TGG | CGA | TTC | 1 | C | T |
| TCGA-29-1783 | RFTN2      | ENST00000295049 | p.Y36Y   | c.108C>T  | Unverified | GCT | TAC | GAA | 3 | C | T |
| TCGA-29-1770 | RFX3_ENSTC | ENST00000382004 | p.L720L  | c.2160C>T | Unverified | AGC | CTC | CTG | 3 | C | T |
| TCGA-61-1910 | RFX5       | ENST00000368870 | p.A371A  | c.1113C>T | Unverified | AGG | GCC | GGG | 3 | C | T |
| TCGA-29-1781 | RFX6       | ENST00000332958 | p.L306L  | c.918C>T  | Unverified | CTG | CTC | GAA | 3 | C | T |
| TCGA-09-2049 | RGAG4      | XM_291322.3     | p.S185S  | c.555C>T  | Verified   | cgc | agc | acc | 3 | C | T |
| TCGA-13-0903 | RGPD3      | ENST00000409886 | p.S496S  | c.1488C>T | Verified   | ACC | AGC | CAC | 3 | C | T |
| TCGA-61-1914 | RGR        | ENST00000359452 | p.F138F  | c.414C>T  | Unverified | CTC | TTC | GTG | 3 | C | T |
| TCGA-29-1763 | RGS16      | ENST00000367558 | p.A187A  | c.561C>T  | Unverified | GCC | GCC | TCT | 3 | C | T |
| TCGA-24-1435 | RGS22      | ENST00000360863 | p.T12l   | c.35C>T   | Verified   | CCA | ACT | ATT | 2 | C | T |
| TCGA-23-1031 | RGS3       | NM_144488.2     | p.l26l   | c.78C>T   | Verified   | agg | atc | acg | 3 | C | T |
| TCGA-23-1032 | RGS4       | ENST00000367909 | p.R166C  | c.496C>T  | Verified   | tac | cgc | cgc | 1 | C | T |
| TCGA-04-1652 | RGS7BP     | ENST00000334025 | p.S40S   | c.120C>T  | Unverified | GGC | TCC | GAG | 3 | C | T |
| TCGA-04-1652 | RGS7BP     | ENST00000334025 | p.S40S   | c.120C>T  | Unverified | GGC | TCC | GAG | 3 | C | T |
| TCGA-13-0760 | RHBDF1     | ENST00000262316 | p.Y654Y  | c.1962C>T | Verified   | TTC | TAC | CGC | 3 | C | T |
| TCGA-13-0923 | RHPN2      | ENST00000254260 | p.S548L  | c.1643C>T | Verified   | GCC | TCG | GTG | 2 | C | T |
| TCGA-09-2049 | RICTOR     | ENST00000357387 | p.S1373F | c.4118C>T | Verified   | GAG | TCC | AGA | 2 | C | T |
| TCGA-13-1505 | RILP       | ENST00000301336 | p.A397A  | c.1191C>T | Verified   | TCA | GCC | GCC | 3 | C | T |
| TCGA-04-1649 | RIMBP2     | ENST00000261655 | p.P320L  | c.959C>T  | Unverified | CCC | CCG | GCG | 2 | C | T |

|              |            |                 |          |           |            |     |     |     |   |   |   |
|--------------|------------|-----------------|----------|-----------|------------|-----|-----|-----|---|---|---|
| TCGA-61-1904 | RIMKLA     | ENST00000372570 | p.R318W  | c.952C>T  | Unverified | ATC | CGG | GAT | 1 | C | T |
| TCGA-61-1998 | RIMS1      | ENST00000521978 | p.L1140L | c.3418C>T | Unverified | TCC | CTA | GAT | 1 | C | T |
| TCGA-13-1497 | RIMS4      | ENST00000372851 | p.R36W   | c.106C>T  | Verified   | AGC | CGG | AGG | 1 | C | T |
| TCGA-23-1022 | RIMS4      | ENST00000372851 | p.L223L  | c.667C>T  | Verified   | GAG | CTG | GAC | 1 | C | T |
| TCGA-23-2077 | RIMS4      | ENST00000372851 | p.R108C  | c.322C>T  | Unverified | GGC | CGC | CAG | 1 | C | T |
| TCGA-29-1763 | RIN2       | NM_018993.2     | p.Q820*  | c.2458C>T | Unverified | tgt | cag | atc | 1 | C | T |
| TCGA-29-1763 | RIN2_ENST0 | ENST00000255006 | p.Q869*  | c.2605C>T | Unverified | TGT | CAG | ATC | 1 | C | T |
| TCGA-24-2035 | RLIM       | ENST00000332687 | p.S501L  | c.1502C>T | Verified   | agc | tca | tca | 2 | C | T |
| TCGA-23-1029 | RLN1       | ENST00000223862 | p.R41R   | c.123C>T  | Unverified | GTT | CGC | GCG | 3 | C | T |
| TCGA-09-2044 | RMI2       | ENST00000312499 | p.L125F  | c.373C>T  | Verified   | GAC | CTT | TCT | 1 | C | T |
| TCGA-24-1470 | RNASEH1    | ENST00000315212 | p.Y163Y  | c.489C>T  | Verified   | GTT | TAC | TGG | 3 | C | T |
| TCGA-29-1702 | RNF111     | ENST00000348370 | p.R949C  | c.2845C>T | Unverified | AGA | CGT | CTT | 1 | C | T |
| TCGA-29-1702 | RNF111_EN! | ENST00000434298 | p.R966C  | c.2896C>T | Unverified | AGA | CGT | CTT | 1 | C | T |
| TCGA-04-1347 | RNF114     | ENST00000244061 | p.R76*   | c.226C>T  | Verified   | GTC | CGA | GCC | 1 | C | T |
| TCGA-20-0991 | RNF150     | XM_371709.3     | p.I75I   | c.225C>T  | Verified   | gac | atc | gtg | 3 | C | T |
| TCGA-04-1338 | RNF25      | ENST00000295704 | p.P305L  | c.914C>T  | Verified   | ttg | cca | cct | 2 | C | T |
| TCGA-24-1843 | ROBO1      | ENST00000464233 | p.P303S  | c.907C>T  | Unverified | CTG | CCC | AAA | 1 | C | T |
| TCGA-24-1850 | ROBO1      | ENST00000464233 | p.R1420* | c.4258C>T | Unverified | GCA | CGA | CGG | 1 | C | T |
| TCGA-24-1843 | ROBO1_ENS  | ENST00000464233 | p.P303S  | c.907C>T  | Unverified | CTG | CCC | AAA | 1 | C | T |
| TCGA-24-1850 | ROBO1_ENS  | ENST00000464233 | p.R1420* | c.4258C>T | Unverified | GCA | CGA | CGG | 1 | C | T |
| TCGA-24-1843 | ROBO1_ENS  | ENST00000464233 | p.P303S  | c.907C>T  | Unverified | CTG | CCC | AAA | 1 | C | T |
| TCGA-24-1850 | ROBO1_ENS  | ENST00000464233 | p.R1420* | c.4258C>T | Unverified | GCA | CGA | CGG | 1 | C | T |
| TCGA-24-1843 | ROBO1_ENS  | ENST00000495273 | p.P264S  | c.790C>T  | Unverified | CTG | CCC | AAA | 1 | C | T |
| TCGA-24-1850 | ROBO1_ENS  | ENST00000495273 | p.R1375* | c.4123C>T | Unverified | GCA | CGA | CGG | 1 | C | T |
| TCGA-24-1844 | ROBO2      | ENST00000461745 | p.P551L  | c.1652C>T | Unverified | CTT | CCA | GCA | 2 | C | T |
| TCGA-24-1844 | ROBO2_ENS  | ENST00000487694 | p.P567L  | c.1700C>T | Unverified | CTT | CCA | GCA | 2 | C | T |
| TCGA-29-1777 | ROCK2      | ENST00000315872 | p.A612V  | c.1835C>T | Unverified | ACT | GCC | AAG | 2 | C | T |
| TCGA-29-1777 | ROCK2_ENS  | ENST00000315872 | p.A612V  | c.1835C>T | Unverified | ACT | GCC | AAG | 2 | C | T |
| TCGA-13-0884 | ROR2       | ENST00000375708 | p.P516L  | c.1547C>T | Verified   | ggg | ccc | ctg | 2 | C | T |
| TCGA-09-1665 | ROS1       | ENST00000368508 | p.Q177*  | c.529C>T  | Unverified | CTG | CAG | CTC | 1 | C | T |
| TCGA-24-2262 | RP1L1      | ENST00000382483 | p.R1622W | c.4864C>T | Unverified | GAG | CGG | ACC | 1 | C | T |
| TCGA-61-1910 | RP2        | ENST00000218340 | p.D287D  | c.861C>T  | Unverified | CCT | GAC | TTC | 3 | C | T |
| TCGA-61-1733 | RPL22      | ENST00000234875 | p.R97C   | c.289C>T  | Unverified | CTA | CGT | GAC | 1 | C | T |
| TCGA-61-1733 | RPL22      | ENST00000234875 | p.R97C   | c.289C>T  | Unverified | CTA | CGT | GAC | 1 | C | T |

|              |            |                 |          |            |            |     |     |     |   |   |   |
|--------------|------------|-----------------|----------|------------|------------|-----|-----|-----|---|---|---|
| TCGA-29-1698 | RPL22L1    | ENST00000295830 | p.P3S    | c.7C>T     | Unverified | GCG | CCG | CAG | 1 | C | T |
| TCGA-23-1117 | RPN2       | ENST00000237530 | p.V567V  | c.1701C>T  | Verified   | AAT | GTC | TCC | 3 | C | T |
| TCGA-23-1117 | RPN2       | ENST00000237530 | p.V567V  | c.1701C>T  | Verified   | AAT | GTC | TCC | 3 | C | T |
| TCGA-30-1856 | RPS6KC1    | ENST00000366960 | p.A743V  | c.2228C>T  | Unverified | caa | gca | cat | 2 | C | T |
| TCGA-61-2102 | RPS8       | ENST00000396651 | p.P120P  | c.360C>T   | Verified   | CTG | CCC | CTG | 3 | C | T |
| TCGA-13-1510 | RRBP1      | ENST00000360807 | p.D5D    | c.15C>T    | Unverified | TAC | GAC | ACT | 3 | C | T |
| TCGA-10-0930 | RREB1      | ENST00000379933 | p.S1140F | c.3419C>T  | Verified   | GCC | TCT | CCC | 2 | C | T |
| TCGA-10-0930 | RREB1      | ENST00000379933 | p.S1140F | c.3419C>T  | Verified   | GCC | TCT | CCC | 2 | C | T |
| TCGA-20-1683 | RREB1      | ENST00000379933 | p.A684A  | c.2052C>T  | Unverified | AAG | GCC | GCG | 3 | C | T |
| TCGA-20-1683 | RREB1_ENST | ENST00000379938 | p.A684A  | c.2052C>T  | Unverified | AAG | GCC | GCG | 3 | C | T |
| TCGA-13-0884 | RRP12      | ENST00000370992 | p.T436M  | c.1307C>T  | Verified   | GCT | ACG | CAG | 2 | C | T |
| TCGA-13-0886 | RSAD2      | ENST00000382040 | p.P320L  | c.959C>T   | Unverified | GAC | CCT | TCC | 2 | C | T |
| TCGA-23-1114 | RSBN1L     | ENST00000334955 | p.S832L  | c.2495C>T  | Unverified | AGT | TCA | GCA | 2 | C | T |
| TCGA-25-2401 | RSF1       | ENST00000308488 | p.L126L  | c.378C>T   | Verified   | TAC | CTC | TGT | 3 | C | T |
| TCGA-61-2102 | RSL24D1    | ENST00000260443 | p.N130N  | c.390C>T   | Verified   | CAA | AAC | ATC | 3 | C | T |
| TCGA-04-1638 | RSPH6A     | ENST00000221538 | p.P410L  | c.1229C>T  | Unverified | AAG | CCG | CCG | 2 | C | T |
| TCGA-24-1474 | RTP1       | ENST00000312295 | p.A220V  | c.659C>T   | Verified   | CGG | GCG | CCC | 2 | C | T |
| TCGA-30-1891 | RUNDC3A    | ENST00000426726 | p.R147C  | c.439C>T   | Unverified | CTG | CGT | GAC | 1 | C | T |
| TCGA-04-1655 | RUNX1T1    | ENST00000360348 | p.R496*  | c.1486C>T  | Unverified | GCC | CGA | TAC | 1 | C | T |
| TCGA-04-1655 | RUNX1T1_EI | ENST00000265814 | p.R533*  | c.1597C>T  | Unverified | GCC | CGA | TAC | 1 | C | T |
| TCGA-04-1655 | RUNX1T1_EI | ENST00000436581 | p.R544*  | c.1630C>T  | Unverified | GCC | CGA | TAC | 1 | C | T |
| TCGA-61-1740 | RUVBL2_EN  | ENST00000221413 | p.S310F  | c.929C>T   | Unverified | TTC | TCC | TTC | 2 | C | T |
| TCGA-23-1124 | RXR8       | ENST00000374680 | p.R252C  | c.754C>T   | Verified   | aag | cgc | cag | 1 | C | T |
| TCGA-23-1022 | RXR8       | ENST00000374680 | p.S410L  | c.1229C>T  | Verified   | cat | tca | gca | 2 | C | T |
| TCGA-61-2012 | RYK        | NM_002958       | p.R340C  | c.1018C>T  | Verified   | ggg | cgt | att | 1 | C | T |
| TCGA-04-1655 | RYR1       | ENST00000359596 | p.G3299G | c.9897C>T  | Unverified | GCC | GGC | GCC | 3 | C | T |
| TCGA-23-1021 | RYR1       | ENST00000359596 | p.I4902I | c.14706C>T | Verified   | GAG | ATC | GAG | 3 | C | T |
| TCGA-25-2401 | RYR2       | ENST00000366574 | p.A2498V | c.7493C>T  | Verified   | CGG | GCG | GCT | 2 | C | T |
| TCGA-23-1031 | RYR2       | ENST00000366574 | p.I4094I | c.12282C>T | Verified   | GAC | ATC | GGC | 3 | C | T |
| TCGA-61-1998 | RYR3       | ENST00000389232 | p.I666I  | c.1998C>T  | Verified   | ATT | ATC | GAC | 3 | C | T |
| TCGA-24-1469 | SACS       | NM_014363.3     | p.Q1481* | c.4441C>T  | Verified   | tgt | cag | tta | 1 | C | T |
| TCGA-13-0904 | SAMD3      | ENST00000368134 | p.A277V  | c.830C>T   | Verified   | GAA | GCT | GTT | 2 | C | T |
| TCGA-13-1497 | SAMSN1     | ENST00000400566 | p.L296L  | c.886C>T   | Verified   | TTA | CTA | TCA | 1 | C | T |
| TCGA-29-1766 | SAP130     | ENST00000259235 | p.T410T  | c.1230C>T  | Unverified | GTT | ACC | ATG | 3 | C | T |

|              |            |                     |          |           |            |     |     |     |   |   |   |
|--------------|------------|---------------------|----------|-----------|------------|-----|-----|-----|---|---|---|
| TCGA-29-1766 | SAP130_ENS | ENST00000357702     | p.T410T  | c.1230C>T | Unverified | GTT | ACC | ATG | 3 | C | T |
| TCGA-61-1998 | SAP30BP    | ENST00000584667     | p.Y151Y  | c.453C>T  | Verified   | AAC | TAC | ATT | 3 | C | T |
| TCGA-61-1907 | SASH1      | ENST00000367467     | p.A879V  | c.2636C>T | Unverified | AAG | GCC | CAG | 2 | C | T |
| TCGA-04-1542 | SASS6      | ENST00000287482     | p.A378V  | c.1133C>T | Verified   | TCT | GCA | GAA | 2 | C | T |
| TCGA-29-1691 | SATB2      | ENST00000417098     | p.P606L  | c.1817C>T | Unverified | CCT | CCG | ACT | 2 | C | T |
| TCGA-61-1910 | SATB2      | ENST00000417098     | p.S707S  | c.2121C>T | Unverified | GGC | TCC | GAG | 3 | C | T |
| TCGA-61-1915 | SATL1      | ENST00000509231     | p.P484S  | c.1450C>T | Unverified | gaa | ccg | ggg | 1 | C | T |
| TCGA-13-0924 | SC5DL      | ENST00000392789     | p.V120V  | c.360C>T  | Verified   | CTT | GTC | GTT | 3 | C | T |
| TCGA-24-1417 | SCAMP3     | ENST00000302631     | p.R329*  | c.985C>T  | Unverified | GTG | CGA | ACC | 1 | C | T |
| TCGA-13-0886 | SCAND3     | ENST00000452236     | p.A3V    | c.8C>T    | Verified   | GAA | GCA | GTC | 2 | C | T |
| TCGA-20-1683 | SCARF1     | ENST00000263071     | p.P687S  | c.2059C>T | Unverified | GGC | CCT | GTG | 1 | C | T |
| TCGA-24-1844 | SCD5       | ENST00000319540     | p.N259N  | c.777C>T  | Unverified | CAG | AAC | CCA | 3 | C | T |
| TCGA-13-0916 | SCEL       | ENST00000349847     | p.H361Y  | c.1081C>T | Verified   | GGA | CAT | GAA | 1 | C | T |
| TCGA-24-0975 | SCEL       | ENST00000349847     | p.Q318*  | c.952C>T  | Unverified | AAT | CAA | AGG | 1 | C | T |
| TCGA-13-0885 | SCFD2      | ENST00000401642     | p.P157L  | c.470C>T  | Verified   | GTC | CCG | TTA | 2 | C | T |
| TCGA-23-1022 | SCGB2A2    | ENST00000227918     | p.A10V   | c.29C>T   | Verified   | CTG | GCG | GCC | 2 | C | T |
| TCGA-24-2289 | SCGB3A2    | ENST00000296694     | p.P38L   | c.113C>T  | Unverified | TTA | CCT | CTG | 2 | C | T |
| TCGA-04-1342 | SCN10A     | ENST00000449082     | p.R302*  | c.904C>T  | Verified   | AAG | CGA | GGC | 1 | C | T |
| TCGA-13-1509 | SCN10A     | ENST00000449082     | p.R498W  | c.1492C>T | Verified   | CGC | CGG | GCT | 1 | C | T |
| TCGA-10-0930 | SCN10A     | ENST00000449082     | p.S1622F | c.4865C>T | Verified   | TAC | TCT | ATC | 2 | C | T |
| TCGA-10-0930 | SCN10A     | ENST00000449082     | p.S1622F | c.4865C>T | Verified   | TAC | TCT | ATC | 2 | C | T |
| TCGA-04-1638 | SCN10A     | ENST00000449082     | p.I75I   | c.225C>T  | Unverified | CTG | ATC | GGG | 3 | C | T |
| TCGA-36-1577 | SCN1A      | ENST00000375405     | p.Q459*  | c.1375C>T | Unverified | GCT | CAG | CAG | 1 | C | T |
| TCGA-13-1489 | SCN1A      | ENST00000375405     | p.F590F  | c.1770C>T | Verified   | GAC | TTC | GCA | 3 | C | T |
| TCGA-13-1509 | SCN2A      | ENST00000375427     | p.P360L  | c.1079C>T | Verified   | AAC | CCC | AAC | 2 | C | T |
| TCGA-13-1512 | SCN3A      | ENST00000283254     | p.R1621* | c.4861C>T | Verified   | TTC | CGA | GTG | 1 | C | T |
| TCGA-24-1616 | SCN3B      | ENST00000299333     | p.R132W  | c.394C>T  | Verified   | CAT | CGG | CCC | 1 | C | T |
| TCGA-29-1768 | SCN5A      | ENST00000333535     | p.T1131T | c.3393C>T | Unverified | GAG | ACC | CCA | 3 | C | T |
| TCGA-30-1891 | SCN5A      | ENST00000333535     | p.S1937S | c.5811C>T | Unverified | CTC | TCC | GAA | 3 | C | T |
| TCGA-29-1768 | SCN5A_ENS  | ENST00000333535_v68 | p.T1131T | c.3393C>T | Unverified | GAG | ACC | CCA | 3 | C | T |
| TCGA-29-1768 | SCN5A_ENS  | ENST00000413689     | p.T1131T | c.3393C>T | Unverified | GAG | ACC | CCA | 3 | C | T |
| TCGA-29-1781 | SCN7A      | ENST00000409855     | p.A1156V | c.3467C>T | Unverified | GTT | GCT | GTT | 2 | C | T |
| TCGA-29-1781 | SCN7A_ENS  | ENST00000409855     | p.A1156V | c.3467C>T | Unverified | GTT | GCT | GTT | 2 | C | T |
| TCGA-61-2095 | SCP2       | ENST00000371514     | p.P356S  | c.1066C>T | Unverified | CAC | CCA | CTA | 1 | C | T |

|              |            |                 |          |           |            |     |     |     |   |   |   |
|--------------|------------|-----------------|----------|-----------|------------|-----|-----|-----|---|---|---|
| TCGA-61-1913 | SDK2       | ENST00000316893 | p.P1766P | c.5298C>T | Unverified | AGC | CCC | GTG | 3 | C | T |
| TCGA-09-2049 | SEC16A     | ENST00000313050 | p.A685V  | c.2054C>T | Unverified | GAA | GCT | GTG | 2 | C | T |
| TCGA-09-1674 | SEC16B     | ENST00000308284 | p.P968L  | c.2903C>T | Unverified | CTG | CCG | GAT | 2 | C | T |
| TCGA-04-1356 | SEL1L2     | ENST00000284951 | p.T267M  | c.800C>T  | Verified   | CTA | ACG | GAA | 2 | C | T |
| TCGA-29-1703 | SELP       | ENST00000367790 | p.R559R  | c.1677C>T | Unverified | GGA | CGC | TGG | 3 | C | T |
| TCGA-20-1683 | SEMA3A     | ENST00000265362 | p.T696I  | c.2087C>T | Unverified | ATG | ACA | CCT | 2 | C | T |
| TCGA-20-1686 | SEMA5A     | ENST00000382496 | p.P1053L | c.3158C>T | Unverified | AAC | CCA | CAT | 2 | C | T |
| TCGA-29-1691 | SEMA5B     | ENST00000357599 | p.Q446*  | c.1336C>T | Unverified | GCG | CAG | CGC | 1 | C | T |
| TCGA-29-1691 | SEMA5B_EN  | ENST00000451055 | p.Q500*  | c.1498C>T | Unverified | GCG | CAG | CGC | 1 | C | T |
| TCGA-20-1685 | SENP7      | NM_020654.2     | p.L302L  | c.904C>T  | Unverified | aag | cta | tcc | 1 | C | T |
| TCGA-25-2398 | SENP7      | NM_020654.2     | p.L797L  | c.2391C>T | Verified   | tat | ctc | gca | 3 | C | T |
| TCGA-20-1685 | SENP7_ENS1 | ENST00000394095 | p.L368L  | c.1102C>T | Unverified | AAA | CTA | TCC | 1 | C | T |
| TCGA-61-1900 | SERINC3    | ENST00000255175 | p.L333L  | c.997C>T  | Unverified | tta | ctg | gat | 1 | C | T |
| TCGA-24-1850 | SERPINA1   | ENST00000440909 | p.F57F   | c.171C>T  | Unverified | gag | ttc | gcc | 3 | C | T |
| TCGA-61-1740 | SERPINA2   | XM_372532.2     | p.S327F  | c.980C>T  | Unverified | gcc | tct | tcc | 2 | C | T |
| TCGA-20-1683 | SERPINB2   | ENST00000299502 | p.H356H  | c.1068C>T | Unverified | ttc | cac | caa | 3 | C | T |
| TCGA-13-0920 | SERPINE1   | ENST00000223095 | p.A119V  | c.356C>T  | Verified   | gac | gcg | atc | 2 | C | T |
| TCGA-04-1347 | SESN2      | ENST00000253063 | p.Y375Y  | c.1125C>T | Verified   | acc | tac | aat | 3 | C | T |
| TCGA-13-0791 | SETD1A     | ENST00000262519 | p.D581D  | c.1743C>T | Unverified | GGA | GAC | GAC | 3 | C | T |
| TCGA-24-1470 | SEZ6L      | ENST00000248933 | p.L824L  | c.2470C>T | Verified   | GTG | CTG | CTG | 1 | C | T |
| TCGA-61-1740 | SEZ6L      | ENST00000248933 | p.D376D  | c.1128C>T | Unverified | CAG | GAC | GAC | 3 | C | T |
| TCGA-25-1313 | SF3B2      | ENST00000322535 | p.P559S  | c.1675C>T | Verified   | CGG | CCT | AAG | 1 | C | T |
| TCGA-13-1501 | SF3B4      | ENST00000271628 | p.P304S  | c.910C>T  | Verified   | CAT | CCA | GGG | 1 | C | T |
| TCGA-13-1501 | SF3B4      | ENST00000271628 | p.P304S  | c.910C>T  | Verified   | CAT | CCA | GGG | 1 | C | T |
| TCGA-13-0755 | SFSWAP     | ENST00000261674 | p.V936V  | c.2808C>T | Verified   | AAA | GTC | AGA | 3 | C | T |
| TCGA-13-0904 | SG223_HUM  | ENST00000330777 | p.T755T  | c.2265C>T | Verified   | ACC | ACC | GGC | 3 | C | T |
| TCGA-29-1695 | SGEF       | ENST00000356448 | p.V703V  | c.2109C>T | Unverified | AAC | GTC | AAT | 3 | C | T |
| TCGA-13-0904 | SgK223     | SU_SgK223       | p.T757T  | c.2271C>T | Verified   | acc | acc | ggc | 3 | C | T |
| TCGA-25-2401 | SGMS1      | ENST00000361781 | p.D251D  | c.753C>T  | Verified   | gga | gac | tgg | 3 | C | T |
| TCGA-24-1845 | SGPP1      | ENST00000247225 | p.P351S  | c.1051C>T | Unverified | TTA | CCT | TTA | 1 | C | T |
| TCGA-24-2035 | SGSH       | ENST00000326317 | p.P329S  | c.985C>T  | Verified   | ATC | CCG | TAC | 1 | C | T |
| TCGA-10-0930 | SGSM1      | ENST00000400358 | p.Q92*   | c.274C>T  | Verified   | GTG | CAA | GAC | 1 | C | T |
| TCGA-10-0930 | SGSM1      | ENST00000400358 | p.Q92*   | c.274C>T  | Verified   | GTG | CAA | GAC | 1 | C | T |
| TCGA-61-1738 | SGSM2      | ENST00000268989 | p.I683I  | c.2049C>T | Unverified | AGC | ATC | GAC | 3 | C | T |

|              |            |                 |          |           |            |     |     |     |   |   |   |
|--------------|------------|-----------------|----------|-----------|------------|-----|-----|-----|---|---|---|
| TCGA-61-1738 | SGSM2      | ENST00000268989 | p.I683I  | c.2049C>T | Unverified | AGC | ATC | GAC | 3 | C | T |
| TCGA-13-0792 | SH2B1      | ENST00000337120 | p.S627F  | c.1880C>T | Verified   | CCA | TCC | TCC | 2 | C | T |
| TCGA-09-1674 | SH3BGR     | ENST00000333634 | p.S239F  | c.716C>T  | Unverified | GAT | TCC | TAG | 2 | C | T |
| TCGA-30-1891 | SH3BP5     | ENST00000383791 | p.Q319*  | c.955C>T  | Unverified | ACC | CAG | TCC | 1 | C | T |
| TCGA-61-2094 | SH3BP5L    | ENST00000366472 | p.T330T  | c.990C>T  | Unverified | GAC | ACC | GAT | 3 | C | T |
| TCGA-13-0807 | SH3GL1     | ENST00000269886 | p.R290*  | c.868C>T  | Verified   | TTC | CGA | TCT | 1 | C | T |
| TCGA-29-1702 | SH3GL3     | ENST00000324537 | p.T97M   | c.290C>T  | Unverified | CAG | ACG | GAA | 2 | C | T |
| TCGA-24-1431 | SH3PXD2A   | ENST00000355946 | p.T778M  | c.2333C>T | Unverified | cag | acg | gcc | 2 | C | T |
| TCGA-13-1510 | SH3RF3     | ENST00000309415 | p.H256H  | c.768C>T  | Unverified | CCA | CAC | GCC | 3 | C | T |
| TCGA-24-1470 | SH3RF3     | ENST00000309415 | p.Y205Y  | c.615C>T  | Verified   | AGC | TAC | GAG | 3 | C | T |
| TCGA-61-1740 | SHANK1     | ENST00000293441 | p.P555L  | c.1664C>T | Unverified | GTA | CCC | GGA | 2 | C | T |
| TCGA-29-1702 | SHANK2     | ENST00000294018 | p.N685N  | c.2055C>T | Unverified | GAG | AAC | AAG | 3 | C | T |
| TCGA-29-1702 | SHANK2_EN  | ENST00000338508 | p.N1281N | c.3843C>T | Unverified | GAG | AAC | AAG | 3 | C | T |
| TCGA-23-1022 | SHARPIN    | ENST00000398712 | p.A362A  | c.1086C>T | Verified   | AAT | GCC | CCA | 3 | C | T |
| TCGA-23-1022 | SHC1_ENSTC | ENST00000448116 | p.A87V   | c.260C>T  | Verified   | AGG | GCA | GCT | 2 | C | T |
| TCGA-61-1904 | SHC3       | ENST00000375835 | p.I212I  | c.636C>T  | Unverified | AGC | ATC | TTG | 3 | C | T |
| TCGA-13-0755 | SHH        | ENST00000297261 | p.D229D  | c.687C>T  | Unverified | GAC | GAC | CAG | 3 | C | T |
| TCGA-61-2012 | SHMT2      | ENST00000328923 | p.R359W  | c.1075C>T | Verified   | GCT | CGG | GCC | 1 | C | T |
| TCGA-61-2012 | SHOC2      | ENST00000369452 | p.P231S  | c.691C>T  | Verified   | CTA | CCT | GCT | 1 | C | T |
| TCGA-04-1542 | SHOX2_ENS  | ENST00000425436 | p.A151V  | c.452C>T  | Verified   | GAT | GCG | AAA | 2 | C | T |
| TCGA-24-0975 | SI         | ENST00000264382 | p.R250C  | c.748C>T  | Unverified | TTT | CGT | CAT | 1 | C | T |
| TCGA-04-1652 | SIDT2      | ENST00000324225 | p.P600L  | c.1799C>T | Unverified | CAC | CCG | GAC | 2 | C | T |
| TCGA-04-1652 | SIDT2      | ENST00000324225 | p.P600L  | c.1799C>T | Unverified | CAC | CCG | GAC | 2 | C | T |
| TCGA-13-0904 | SIGLEC1    | ENST00000344754 | p.N1429N | c.4287C>T | Unverified | CAA | AAC | TTG | 3 | C | T |
| TCGA-23-1809 | SIGLEC1    | ENST00000344754 | p.D1083D | c.3249C>T | Unverified | TTC | GAC | GCT | 3 | C | T |
| TCGA-13-0762 | SIGLEC11   | ENST00000447370 | p.Q613*  | c.1837C>T | Unverified | CAC | CAG | CAT | 1 | C | T |
| TCGA-13-0762 | SIGLEC11   | ENST00000447370 | p.Q613*  | c.1837C>T | Unverified | CAC | CAG | CAT | 1 | C | T |
| TCGA-24-1469 | SIGLEC12   | ENST00000291707 | p.T89I   | c.266C>T  | Verified   | GAG | ACT | CGG | 2 | C | T |
| TCGA-61-2095 | SIGLEC12   | ENST00000291707 | p.T306M  | c.917C>T  | Unverified | CCC | ACG | ATC | 2 | C | T |
| TCGA-13-0793 | SIK3       | SU_QSK          | p.R879R  | c.2637C>T | Verified   | ggg | cgc | ggc | 3 | C | T |
| TCGA-13-0900 | SIN3A      | ENST00000394947 | p.H990Y  | c.2968C>T | Verified   | att | cat | gcc | 1 | C | T |
| TCGA-29-1691 | SIPA1L1    | ENST00000555818 | p.T912I  | c.2735C>T | Unverified | GAC | ACC | AGC | 2 | C | T |
| TCGA-30-1857 | SIRT1      | ENST00000212015 | p.S159S  | c.477C>T  | Unverified | cat | tcc | tgt | 3 | C | T |
| TCGA-61-1900 | SIX1       | ENST00000247182 | p.L203L  | c.609C>T  | Unverified | CAA | CTC | TCT | 3 | C | T |



|              |            |                 |          |           |            |     |     |     |   |   |   |
|--------------|------------|-----------------|----------|-----------|------------|-----|-----|-----|---|---|---|
| TCGA-13-0890 | SIX5       | ENST00000317578 | p.L240L  | c.718C>T  | Verified   | GGC | CTG | TCG | 1 | C | T |
| TCGA-29-1691 | SKA1       | ENST00000285116 | p.G18G   | c.54C>T   | Unverified | ATT | GGC | AAT | 3 | C | T |
| TCGA-20-1683 | SKAP2      | ENST00000345317 | p.R126C  | c.376C>T  | Unverified | AAA | CGC | AGA | 1 | C | T |
| TCGA-24-2262 | SKIL       | ENST00000259119 | p.A634V  | c.1901C>T | Verified   | TTG | GCA | GAA | 2 | C | T |
| TCGA-61-1740 | SLC11A1    | ENST00000233202 | p.P21S   | c.61C>T   | Unverified | AGC | CCG | ACC | 1 | C | T |
| TCGA-13-1481 | SLC11A1    | ENST00000233202 | p.R273R  | c.819C>T  | Verified   | GCC | CGC | CGA | 3 | C | T |
| TCGA-29-1693 | SLC12A1    | ENST00000380993 | p.P494P  | c.1482C>T | Unverified | GGC | CCC | CTC | 3 | C | T |
| TCGA-29-1693 | SLC12A1_EN | ENST00000396577 | p.P494P  | c.1482C>T | Unverified | GGC | CCC | CTC | 3 | C | T |
| TCGA-61-1910 | SLC12A2    | ENST00000262461 | p.R878C  | c.2632C>T | Unverified | GGT | CGT | ATG | 1 | C | T |
| TCGA-23-1029 | SLC12A5    | ENST00000243964 | p.F859F  | c.2577C>T | Unverified | ATC | TTC | ACT | 3 | C | T |
| TCGA-61-1740 | SLC12A5    | ENST00000243964 | p.G703G  | c.2109C>T | Unverified | AAG | GGC | CTG | 3 | C | T |
| TCGA-24-2288 | SLC12A6    | ENST00000290209 | p.A1011V | c.3032C>T | Unverified | AAA | GCG | AAG | 2 | C | T |
| TCGA-24-1104 | SLC13A1    | ENST00000194130 | p.A153V  | c.458C>T  | Verified   | GAG | GCT | GTA | 2 | C | T |
| TCGA-61-1910 | SLC14A2    | ENST00000255226 | p.A372A  | c.1116C>T | Unverified | CTG | GCC | CTC | 3 | C | T |
| TCGA-29-1775 | SLC15A1    | ENST00000376503 | p.C25C   | c.75C>T   | Unverified | TTT | TGC | GAA | 3 | C | T |
| TCGA-13-0893 | SLC16A4    | ENST00000369779 | p.T98I   | c.293C>T  | Verified   | GTT | ACT | GGT | 2 | C | T |
| TCGA-09-1665 | SLC17A6    | ENST00000263160 | p.T162T  | c.486C>T  | Verified   | CTT | ACC | TCT | 3 | C | T |
| TCGA-13-0884 | SLC1A6     | ENST00000221742 | p.A354A  | c.1062C>T | Verified   | CAT | GCC | GGC | 3 | C | T |
| TCGA-13-0755 | SLC20A2    | ENST00000342228 | p.N31N   | c.93C>T   | Verified   | GCC | AAC | TCC | 3 | C | T |
| TCGA-10-0930 | SLC22A11   | ENST00000301891 | p.D109D  | c.327C>T  | Verified   | GCT | GAC | ACG | 3 | C | T |
| TCGA-10-0930 | SLC22A11   | ENST00000301891 | p.D109D  | c.327C>T  | Verified   | GCT | GAC | ACG | 3 | C | T |
| TCGA-13-1507 | SLC22A3    | ENST00000275300 | p.L556F  | c.1666C>T | Verified   | CAC | CTT | TGA | 1 | C | T |
| TCGA-61-1900 | SLC22A6    | ENST00000377871 | p.L91L   | c.273C>T  | Unverified | TTT | CTC | AAT | 3 | C | T |
| TCGA-61-1738 | SLC23A1    | ENST00000353963 | p.V203V  | c.609C>T  | Unverified | TCT | GTC | TTC | 3 | C | T |
| TCGA-61-1738 | SLC23A1    | ENST00000353963 | p.V203V  | c.609C>T  | Unverified | TCT | GTC | TTC | 3 | C | T |
| TCGA-24-1417 | SLC24A4    | ENST00000298877 | p.I461I  | c.1383C>T | Unverified | ATT | ATC | GGA | 3 | C | T |
| TCGA-61-1904 | SLC24A4    | ENST00000298877 | p.Y230Y  | c.690C>T  | Unverified | AAG | TAC | AAT | 3 | C | T |
| TCGA-13-0886 | SLC26A11   | ENST00000361193 | p.S523S  | c.1569C>T | Unverified | TGC | AGC | ATC | 3 | C | T |
| TCGA-29-1703 | SLC26A9    | ENST00000367135 | p.N366N  | c.1098C>T | Unverified | TCG | AAC | CAG | 3 | C | T |
| TCGA-29-1703 | SLC26A9_EN | ENST00000367134 | p.N366N  | c.1098C>T | Unverified | TCG | AAC | CAG | 3 | C | T |
| TCGA-30-1855 | SLC28A1    | ENST00000286749 | p.L132L  | c.394C>T  | Unverified | CTT | CTG | GGG | 1 | C | T |
| TCGA-30-1855 | SLC28A1_EN | ENST00000338602 | p.L132L  | c.394C>T  | Unverified | CTT | CTG | GGG | 1 | C | T |
| TCGA-13-1509 | SLC28A2    | ENST00000347644 | p.A359V  | c.1076C>T | Verified   | GAT | GCA | TCA | 2 | C | T |
| TCGA-24-1104 | SLC28A3    | ENST00000376238 | p.Y488Y  | c.1464C>T | Verified   | TCC | TAC | ATC | 3 | C | T |

|              |            |                 |         |           |            |     |     |     |   |   |   |
|--------------|------------|-----------------|---------|-----------|------------|-----|-----|-----|---|---|---|
| TCGA-13-0906 | SLC29A1    | ENST00000371708 | p.S46F  | c.137C>T  | Unverified | ATG | TCC | CAG | 2 | C | T |
| TCGA-20-0990 | SLC2A10    | ENST00000359271 | p.T411T | c.1233C>T | Verified   | TGG | ACC | GCA | 3 | C | T |
| TCGA-29-1711 | SLC2A2     | ENST00000314251 | p.P463L | c.1388C>T | Unverified | GGA | CCT | TAT | 2 | C | T |
| TCGA-29-1711 | SLC2A2     | ENST00000314251 | p.P463L | c.1388C>T | Unverified | GGA | CCT | TAT | 2 | C | T |
| TCGA-04-1542 | SLC30A9    | ENST00000264451 | p.G96G  | c.288C>T  | Verified   | ATA | GGC | ACA | 3 | C | T |
| TCGA-13-1507 | SLC33A1    | ENST00000392845 | p.Y298Y | c.894C>T  | Verified   | ACT | TAC | AAG | 3 | C | T |
| TCGA-24-1422 | SLC33A1    | ENST00000392845 | p.N282N | c.846C>T  | Verified   | GAA | AAC | GAA | 3 | C | T |
| TCGA-24-2267 | SLC35E1    | ENST00000248069 | p.F102F | c.306C>T  | Verified   | GCT | TTC | CTG | 3 | C | T |
| TCGA-30-1855 | SLC36A2    | ENST00000335244 | p.N186N | c.558C>T  | Unverified | AAC | AAC | TGC | 3 | C | T |
| TCGA-29-1769 | SLC36A3    | ENST00000335230 | p.S335F | c.1004C>T | Unverified | TAC | TCT | ATC | 2 | C | T |
| TCGA-24-0979 | SLC38A4    | ENST00000266579 | p.A382V | c.1145C>T | Verified   | CTT | GCC | GCC | 2 | C | T |
| TCGA-04-1347 | SLC38A5    | ENST00000376876 | p.A118V | c.353C>T  | Verified   | AGG | GCA | TTC | 2 | C | T |
| TCGA-13-1507 | SLC38A5    | ENST00000376876 | p.I404I | c.1212C>T | Verified   | GTT | ATC | GGG | 3 | C | T |
| TCGA-09-2051 | SLC38A7    | ENST00000219320 | p.S207S | c.621C>T  | Unverified | CTG | AGC | GTC | 3 | C | T |
| TCGA-13-0884 | SLC39A11   | ENST00000255559 | p.A89V  | c.266C>T  | Verified   | GGA | GCG | GCT | 2 | C | T |
| TCGA-24-0979 | SLC39A2    | ENST00000298681 | p.H202Y | c.604C>T  | Verified   | GCT | CAT | AAG | 1 | C | T |
| TCGA-09-2050 | SLC39A2    | ENST00000298681 | p.I27I  | c.81C>T   | Verified   | CCC | ATC | TGC | 3 | C | T |
| TCGA-13-1510 | SLC39A4    | ENST00000301305 | p.L619L | c.1857C>T | Unverified | TGG | CTC | CTC | 3 | C | T |
| TCGA-29-1691 | SLC43A3    | ENST00000395123 | p.Q265* | c.793C>T  | Unverified | AAG | CAG | GAA | 1 | C | T |
| TCGA-61-2113 | SLC45A1    | ENST00000289877 | p.F608F | c.1824C>T | Unverified | TAC | TTC | ATC | 3 | C | T |
| TCGA-13-0923 | SLC45A2    | ENST00000296589 | p.L226L | c.678C>T  | Verified   | GTG | CTC | ACT | 3 | C | T |
| TCGA-20-0991 | SLC45A4    | ENST00000024061 | p.V507V | c.1521C>T | Verified   | GGG | GTC | AAG | 3 | C | T |
| TCGA-20-1687 | SLC45A4    | ENST00000024061 | p.A684A | c.2052C>T | Unverified | TTG | GCC | GGC | 3 | C | T |
| TCGA-23-1120 | SLC4A1     | ENST00000262418 | p.T728T | c.2184C>T | Verified   | ACC | ACC | GTG | 3 | C | T |
| TCGA-24-1846 | SLC4A4     | ENST00000340595 | p.R397W | c.1189C>T | Unverified | GGA | CGG | TTC | 1 | C | T |
| TCGA-24-1846 | SLC4A4_ENS | ENST00000425175 | p.R441W | c.1321C>T | Unverified | GGA | CGG | TTC | 1 | C | T |
| TCGA-23-1124 | SLC4A5     | ENST00000394019 | p.R217C | c.649C>T  | Verified   | CAC | CGC | CAC | 1 | C | T |
| TCGA-13-0885 | SLC5A9     | ENST00000236495 | p.L531L | c.1591C>T | Verified   | ATC | CTG | GAG | 1 | C | T |
| TCGA-61-2009 | SLC5A9     | ENST00000236495 | p.R61*  | c.181C>T  | Verified   | AGT | CGA | GGG | 1 | C | T |
| TCGA-09-2044 | SLC6A1     | ENST00000287766 | p.F122F | c.366C>T  | Verified   | ATG | TTC | AAG | 3 | C | T |
| TCGA-13-0885 | SLC6A16    | ENST00000335875 | p.A318V | c.953C>T  | Verified   | GGG | GCA | AAA | 2 | C | T |
| TCGA-29-1764 | SLC6A18    | ENST00000324642 | p.I331I | c.993C>T  | Unverified | CTC | ATC | AAC | 3 | C | T |
| TCGA-04-1649 | SLC6A4     | ENST00000261707 | p.R234C | c.700C>T  | Unverified | ACG | CGC | CAC | 1 | C | T |
| TCGA-24-2035 | SLC6A9     | ENST00000372310 | p.C550C | c.1650C>T | Unverified | CTC | TGC | ATC | 3 | C | T |

|              |            |                 |          |           |            |     |     |     |   |   |   |
|--------------|------------|-----------------|----------|-----------|------------|-----|-----|-----|---|---|---|
| TCGA-29-2427 | SLC8A3     | ENST00000381269 | p.D471D  | c.1413C>T | Verified   | GAT | GAC | GAC | 3 | C | T |
| TCGA-13-0887 | SLC9A1     | ENST00000263980 | p.G702G  | c.2106C>T | Verified   | ATC | GGC | TCA | 3 | C | T |
| TCGA-20-1685 | SLC9A6     | ENST00000370698 | p.A287V  | c.860C>T  | Unverified | aca | gcg | atg | 2 | C | T |
| TCGA-13-1507 | SLC9A9     | ENST00000316549 | p.T128I  | c.383C>T  | Verified   | atg | aca | ttt | 2 | C | T |
| TCGA-25-2042 | SLCO1B3    | ENST00000381545 | p.C430C  | c.1290C>T | Unverified | ATC | TGC | GAA | 3 | C | T |
| TCGA-24-1104 | SLCO4A1    | ENST00000370507 | p.A325A  | c.975C>T  | Verified   | ACC | GCC | GTT | 3 | C | T |
| TCGA-61-2012 | SLFN13     | ENST00000285013 | p.Q368*  | c.1102C>T | Verified   | TCT | CAG | TTG | 1 | C | T |
| TCGA-24-2288 | SLITRK1    | ENST00000377084 | p.I236I  | c.708C>T  | Unverified | CTG | ATC | GGC | 3 | C | T |
| TCGA-24-2262 | SLITRK2    | ENST00000447897 | p.R22C   | c.64C>T   | Verified   | agt | cgc | aaa | 1 | C | T |
| TCGA-04-1542 | SLITRK3    | ENST00000241274 | p.P785L  | c.2354C>T | Verified   | CCA | CCG | GGA | 2 | C | T |
| TCGA-09-2056 | SLITRK3    | ENST00000241274 | p.T832M  | c.2495C>T | Verified   | GTG | ACG | GTG | 2 | C | T |
| TCGA-29-1770 | SLITRK5    | ENST00000325089 | p.P649S  | c.1945C>T | Unverified | GCC | CCC | GCG | 1 | C | T |
| TCGA-24-1474 | SMARCA1    | NM_003069.2     | p.R253*  | c.757C>T  | Verified   | aaa | cga | tgg | 1 | C | T |
| TCGA-24-1474 | SMARCA4    | ENST00000429416 | p.L1108L | c.3324C>T | Verified   | tcc | ctc | atg | 3 | C | T |
| TCGA-24-1604 | SMARCA4    | ENST00000429416 | p.S613S  | c.1839C>T | Verified   | atg | agc | gac | 3 | C | T |
| TCGA-13-0762 | SMARCB1    | ENST00000263121 | p.P351S  | c.1051C>T | Unverified | tgc | cca | ctg | 1 | C | T |
| TCGA-13-0762 | SMARCB1    | ENST00000263121 | p.P351S  | c.1051C>T | Unverified | tgc | cca | ctg | 1 | C | T |
| TCGA-13-0893 | SMG5       | ENST00000361813 | p.R634R  | c.1902C>T | Verified   | GGA | CGC | TCC | 3 | C | T |
| TCGA-13-0793 | SMG6       | ENST00000263073 | p.Q283*  | c.847C>T  | Unverified | CGA | CAG | GAT | 1 | C | T |
| TCGA-25-1318 | SMG6       | ENST00000263073 | p.Q283*  | c.847C>T  | Unverified | CGA | CAG | GAT | 1 | C | T |
| TCGA-25-1318 | SMG6       | ENST00000263073 | p.Q283*  | c.847C>T  | Unverified | CGA | CAG | GAT | 1 | C | T |
| TCGA-04-1336 | SMG8       | ENST00000300917 | p.P370S  | c.1108C>T | Verified   | GTG | CCT | GCA | 1 | C | T |
| TCGA-29-1698 | SMOC1      | ENST00000361956 | p.R96C   | c.286C>T  | Unverified | TGT | CGC | CTG | 1 | C | T |
| TCGA-13-0886 | SMOC1      | ENST00000361956 | p.S22F   | c.65C>T   | Unverified | CTG | TCC | CCT | 2 | C | T |
| TCGA-24-2289 | SMTN       | ENST00000333137 | p.N483N  | c.1449C>T | Unverified | GGC | AAC | CAG | 3 | C | T |
| TCGA-29-1785 | SMU1       | ENST00000397149 | p.G151G  | c.453C>T  | Unverified | GCT | GGC | GAA | 3 | C | T |
| TCGA-29-1785 | SMU1       | ENST00000397149 | p.G151G  | c.453C>T  | Unverified | GCT | GGC | GAA | 3 | C | T |
| TCGA-23-1123 | SMYD1      | ENST00000419482 | p.A107V  | c.320C>T  | Verified   | CTG | GCG | GCG | 2 | C | T |
| TCGA-23-1123 | SMYD1      | ENST00000419482 | p.A107V  | c.320C>T  | Verified   | CTG | GCG | GCG | 2 | C | T |
| TCGA-24-2289 | SNCAIP     | ENST00000261368 | p.P388L  | c.1163C>T | Unverified | ACT | CCA | GCA | 2 | C | T |
| TCGA-24-2289 | SNCAIP_ENS | ENST00000379533 | p.P435L  | c.1304C>T | Unverified | ACT | CCA | GCA | 2 | C | T |
| TCGA-24-2289 | SNPH       | ENST00000381873 | p.Q173*  | c.517C>T  | Unverified | ATC | CAG | AAC | 1 | C | T |
| TCGA-04-1342 | SNRNP200   | ENST00000323853 | p.R739W  | c.2215C>T | Verified   | ATC | CGG | GAC | 1 | C | T |
| TCGA-24-1422 | SNRNP200   | ENST00000323853 | p.T239I  | c.716C>T  | Verified   | TGC | ACC | CTC | 2 | C | T |

|              |            |                 |          |           |            |     |     |     |   |   |   |
|--------------|------------|-----------------|----------|-----------|------------|-----|-----|-----|---|---|---|
| TCGA-23-1114 | SNRPB      | ENST00000438552 | p.S6S    | c.18C>T   | Unverified | aag | agc | agc | 3 | C | T |
| TCGA-09-1665 | SNTG1      | ENST00000518864 | p.I209I  | c.627C>T  | Verified   | CTG | ATC | CCT | 3 | C | T |
| TCGA-13-0760 | SNX17      | ENST00000233575 | p.L266L  | c.796C>T  | Verified   | acg | ctg | cgg | 1 | C | T |
| TCGA-61-2095 | SOCS5      | ENST00000306503 | p.S195S  | c.585C>T  | Unverified | tac | agc | aag | 3 | C | T |
| TCGA-04-1362 | SON        | ENST00000356577 | p.S1782F | c.5345C>T | Verified   | GAG | TCT | TCT | 2 | C | T |
| TCGA-29-1784 | SORBS2     | ENST00000284776 | p.P111L  | c.332C>T  | Unverified | aag | ccg | gat | 2 | C | T |
| TCGA-29-1784 | SORBS2_EN! | ENST00000393528 | p.P157L  | c.470C>T  | Unverified | AAG | CCG | GAT | 2 | C | T |
| TCGA-29-1784 | SORBS2_EN! | ENST00000437304 | p.P290L  | c.869C>T  | Unverified | AAG | CCG | GAT | 2 | C | T |
| TCGA-29-1784 | SORBS2_EN! | ENST00000448662 | p.P180L  | c.539C>T  | Unverified | AAG | CCG | GAT | 2 | C | T |
| TCGA-29-1691 | SORCS3     | ENST00000369701 | p.S233L  | c.698C>T  | Unverified | AGG | TCG | ACA | 2 | C | T |
| TCGA-04-1347 | SORL1      | ENST00000260197 | p.D1434D | c.4302C>T | Verified   | ATG | GAC | ACC | 3 | C | T |
| TCGA-29-1690 | SOS1       | ENST00000426016 | p.P1276L | c.3827C>T | Unverified | tca | cca | cca | 2 | C | T |
| TCGA-24-1422 | SOX5       | ENST00000451604 | p.S370F  | c.1109C>T | Verified   | gta | tct | cct | 2 | C | T |
| TCGA-23-1123 | SOX6       | ENST00000316399 | p.R592C  | c.1774C>T | Verified   | GCC | CGC | GGC | 1 | C | T |
| TCGA-23-1123 | SOX6       | ENST00000316399 | p.R592C  | c.1774C>T | Verified   | GCC | CGC | GGC | 1 | C | T |
| TCGA-61-2113 | SP4        | ENST00000222584 | p.R665*  | c.1993C>T | Verified   | TTA | CGA | GCA | 1 | C | T |
| TCGA-23-1032 | SPAG1      | ENST00000388798 | p.L900L  | c.2698C>T | Verified   | CAG | CTG | TTT | 1 | C | T |
| TCGA-24-1843 | SPAM1      | ENST00000340011 | p.S430F  | c.1289C>T | Unverified | TTT | TCT | GAA | 2 | C | T |
| TCGA-24-1843 | SPAM1_ENS  | ENST00000439500 | p.S430F  | c.1289C>T | Unverified | TTT | TCT | GAA | 2 | C | T |
| TCGA-13-0760 | SPDEF      | ENST00000374037 | p.S3S    | c.9C>T    | Verified   | ggc | agc | gcc | 3 | C | T |
| TCGA-24-1463 | SPECC1     | ENST00000261503 | p.S131L  | c.392C>T  | Verified   | AAA | TCA | GTG | 2 | C | T |
| TCGA-13-1509 | SPEF2_ENST | ENST00000356031 | p.S1319L | c.3956C>T | Verified   | AAA | TCA | CCA | 2 | C | T |
| TCGA-24-1469 | SPEG       | SU_SPEG         | p.T159M  | c.476C>T  | Verified   | ccc | acg | ggg | 2 | C | T |
| TCGA-04-1338 | SPG11      | ENST00000261866 | p.L920L  | c.2758C>T | Verified   | CTT | CTG | ACT | 1 | C | T |
| TCGA-23-1117 | SPG11      | ENST00000261866 | p.L113L  | c.337C>T  | Verified   | GAA | CTG | CTT | 1 | C | T |
| TCGA-23-1117 | SPG11      | ENST00000261866 | p.L113L  | c.337C>T  | Verified   | GAA | CTG | CTT | 1 | C | T |
| TCGA-61-1915 | SPG11      | ENST00000261866 | p.V1908V | c.5724C>T | Unverified | GAT | GTC | GCC | 3 | C | T |
| TCGA-09-2049 | SPI1       | NM_003120.1     | p.S247S  | c.741C>T  | Unverified | ttc | agc | ggc | 3 | C | T |
| TCGA-61-2109 | SPIN2A     | ENST00000374908 | p.V251V  | c.753C>T  | Unverified | TAT | GTC | TAC | 3 | C | T |
| TCGA-29-1783 | SPIN3_ENST | ENST00000374919 | p.P170L  | c.509C>T  | Unverified | GAT | CCT | GTA | 2 | C | T |
| TCGA-20-0990 | SPIRE1     | ENST00000309836 | p.T323I  | c.968C>T  | Unverified | TCC | ACA | AGG | 2 | C | T |
| TCGA-61-2113 | SPOCK2     | ENST00000317376 | p.T259T  | c.777C>T  | Unverified | GAC | ACC | AGT | 3 | C | T |
| TCGA-61-1910 | SPPL2A     | ENST00000261854 | p.P272L  | c.815C>T  | Unverified | ata | cca | tat | 2 | C | T |
| TCGA-29-1761 | SPRYD5     | NM_032681.1     | p.H38Y   | c.112C>T  | Unverified | cat | cac | ttg | 1 | C | T |

|              |            |                 |          |           |            |     |     |     |   |   |   |
|--------------|------------|-----------------|----------|-----------|------------|-----|-----|-----|---|---|---|
| TCGA-29-1761 | SPRYD5_EN! | ENST00000327733 | p.H197Y  | c.589C>T  | Unverified | CAT | CAC | TTG | 1 | C | T |
| TCGA-61-2012 | SPTAN1     | ENST00000372731 | p.S43F   | c.128C>T  | Verified   | GAT | TCC | TAT | 2 | C | T |
| TCGA-13-0893 | SPTBN1     | ENST00000356805 | p.L962F  | c.2884C>T | Verified   | CAC | CTC | GAG | 1 | C | T |
| TCGA-13-1512 | SPTBN4     | ENST00000352632 | p.S2105S | c.6315C>T | Verified   | TTC | AGC | TCT | 3 | C | T |
| TCGA-25-1313 | SPTBN4     | ENST00000352632 | p.S235S  | c.705C>T  | Verified   | AAG | TCC | AAT | 3 | C | T |
| TCGA-23-2078 | SPTBN5     | ENST00000320955 | p.C842C  | c.2526C>T | Unverified | TCC | TGC | CAC | 3 | C | T |
| TCGA-13-1497 | SRCAP      | ENST00000262518 | p.S956F  | c.2867C>T | Verified   | GTC | TCT | CGA | 2 | C | T |
| TCGA-25-1326 | SRPK2      | ENST00000357311 | p.V146V  | c.438C>T  | Unverified | gtg | gtc | cag | 3 | C | T |
| TCGA-24-1474 | SRRT       | ENST00000347433 | p.S366S  | c.1098C>T | Verified   | GGC | AGC | GTG | 3 | C | T |
| TCGA-10-0930 | SS18L1     | ENST00000331758 | p.R293W  | c.877C>T  | Verified   | GAC | CGG | TCC | 1 | C | T |
| TCGA-10-0930 | SS18L1     | ENST00000331758 | p.R293W  | c.877C>T  | Verified   | GAC | CGG | TCC | 1 | C | T |
| TCGA-13-0760 | SSH1       | ENST00000326495 | p.A401V  | c.1202C>T | Verified   | TCG | GCC | TCC | 2 | C | T |
| TCGA-23-1032 | SSH3       | ENST00000308127 | p.S636F  | c.1907C>T | Unverified | ATT | TCC | TCT | 2 | C | T |
| TCGA-09-2044 | SSRP1      | ENST00000278412 | p.N498N  | c.1494C>T | Verified   | agc | aac | gcc | 3 | C | T |
| TCGA-61-1725 | ST18       | ENST00000276480 | p.R557C  | c.1669C>T | Unverified | GGC | CGT | GCC | 1 | C | T |
| TCGA-61-2009 | ST3GAL3    | ENST00000361746 | p.R190W  | c.568C>T  | Verified   | ATC | CGG | GAG | 1 | C | T |
| TCGA-13-1509 | ST6GAL2    | ENST00000361686 | p.S360L  | c.1079C>T | Verified   | AGT | TCA | CTG | 2 | C | T |
| TCGA-13-0893 | ST6GAL2    | ENST00000361686 | p.A64A   | c.192C>T  | Verified   | GGC | GCC | GCA | 3 | C | T |
| TCGA-61-1914 | ST6GALNAC  | ENST00000156626 | p.T163M  | c.488C>T  | Unverified | AAG | ACG | ACC | 2 | C | T |
| TCGA-09-2051 | ST8SIA1    | ENST00000396037 | p.S120L  | c.359C>T  | Verified   | AAT | TCA | ACT | 2 | C | T |
| TCGA-29-1690 | STAB1      | ENST00000321725 | p.P1458P | c.4374C>T | Unverified | GAC | CCC | TGC | 3 | C | T |
| TCGA-23-1022 | STAB2      | ENST00000388887 | p.L583F  | c.1747C>T | Verified   | AAG | CTT | CTG | 1 | C | T |
| TCGA-61-1906 | STAB2      | ENST00000388887 | p.R69*   | c.205C>T  | Unverified | GTT | CGA | GAT | 1 | C | T |
| TCGA-61-1906 | STAB2      | ENST00000388887 | p.R69*   | c.205C>T  | Unverified | GTT | CGA | GAT | 1 | C | T |
| TCGA-24-1616 | STAB2      | ENST00000388887 | p.A1874A | c.5622C>T | Verified   | GTG | GCC | TAC | 3 | C | T |
| TCGA-20-0990 | STAG2      | ENST00000371160 | p.R184W  | c.550C>T  | Verified   | gta | cgg | caa | 1 | C | T |
| TCGA-61-1738 | STAG3      | ENST00000426455 | p.S1016F | c.3047C>T | Unverified | ttt | tcc | ccc | 2 | C | T |
| TCGA-61-1738 | STAG3      | ENST00000426455 | p.S1016F | c.3047C>T | Unverified | ttt | tcc | ccc | 2 | C | T |
| TCGA-61-1740 | STAM       | ENST00000377524 | p.L342L  | c.1026C>T | Unverified | cct | ctc | att | 3 | C | T |
| TCGA-23-1021 | STAT4      | ENST00000358470 | p.H401Y  | c.1201C>T | Verified   | cga | cat | ttg | 1 | C | T |
| TCGA-20-0991 | STAT6      | ENST00000300134 | p.V7V    | c.21C>T   | Verified   | ctg | gtc | tcc | 3 | C | T |
| TCGA-13-0913 | STAU1      | ENST00000371856 | p.A359V  | c.1076C>T | Verified   | cag | gcg | cag | 2 | C | T |
| TCGA-13-0887 | STK33      | ENST00000447869 | p.T140M  | c.419C>T  | Verified   | GAA | ACG | AAG | 2 | C | T |
| TCGA-29-1763 | STRA6      | ENST00000395105 | p.A130V  | c.389C>T  | Unverified | CTC | GCC | TCA | 2 | C | T |

|              |            |                 |          |           |            |     |     |     |   |   |   |
|--------------|------------|-----------------|----------|-----------|------------|-----|-----|-----|---|---|---|
| TCGA-29-1711 | STRC_ENSTC | ENST00000450892 | p.T259I  | c.776C>T  | Unverified | GTC | ACT | CAC | 2 | C | T |
| TCGA-29-1711 | STRC_ENSTC | ENST00000450892 | p.T259I  | c.776C>T  | Unverified | GTC | ACT | CAC | 2 | C | T |
| TCGA-29-1776 | STX16      | ENST00000371132 | p.Q243*  | c.727C>T  | Unverified | GAA | CAG | GGT | 1 | C | T |
| TCGA-61-1915 | STX5       | ENST00000294179 | p.Q210*  | c.628C>T  | Unverified | GAG | CAG | TTC | 1 | C | T |
| TCGA-29-1693 | STXBP3     | ENST00000370008 | p.F110F  | c.330C>T  | Unverified | TAC | TTC | ACT | 3 | C | T |
| TCGA-29-1775 | SUB1       | ENST00000265073 | p.S4L    | c.11C>T   | Unverified | AAA | TCA | AAG | 2 | C | T |
| TCGA-20-1683 | SULF2      | ENST00000359930 | p.Y604Y  | c.1812C>T | Unverified | tgc | tac | atc | 3 | C | T |
| TCGA-09-0369 | SUMF2      | ENST00000275607 | p.P297L  | c.890C>T  | Verified   | CGG | CCG | CCA | 2 | C | T |
| TCGA-09-0369 | SUMF2      | ENST00000275607 | p.P297L  | c.890C>T  | Verified   | CGG | CCG | CCA | 2 | C | T |
| TCGA-24-2289 | SUN5       | ENST00000356173 | p.Y193Y  | c.579C>T  | Unverified | GAT | TAC | ATC | 3 | C | T |
| TCGA-13-1497 | SUPT5H     | ENST00000359191 | p.R416W  | c.1246C>T | Verified   | GAG | CGG | GAG | 1 | C | T |
| TCGA-24-1850 | SURF5      | ENST00000343730 | p.D121D  | c.363C>T  | Unverified | CGA | GAC | GAG | 3 | C | T |
| TCGA-13-0905 | SUSD5      | ENST00000309558 | p.C86C   | c.258C>T  | Verified   | GTG | TGC | ACC | 3 | C | T |
| TCGA-25-1326 | SV2A       | ENST00000369146 | p.R419C  | c.1255C>T | Verified   | CAG | CGC | TGG | 1 | C | T |
| TCGA-25-2401 | SV2B       | ENST00000394232 | p.G264G  | c.792C>T  | Verified   | TGG | GGC | TTC | 3 | C | T |
| TCGA-61-1904 | SVEP1      | ENST00000401783 | p.T2519T | c.7557C>T | Unverified | CAG | ACC | GTT | 3 | C | T |
| TCGA-13-0885 | SWAP70     | ENST00000318950 | p.A480V  | c.1439C>T | Verified   | GAG | GCG | GAG | 2 | C | T |
| TCGA-13-0885 | SWT1       | ENST00000367501 | p.N216N  | c.648C>T  | Verified   | TAT | AAC | TCC | 3 | C | T |
| TCGA-61-2008 | SYCP2      | ENST00000357552 | p.S1161L | c.3482C>T | Verified   | AAG | TCA | CCC | 2 | C | T |
| TCGA-61-1904 | SYMPK      | ENST00000245934 | p.T193T  | c.579C>T  | Unverified | GTC | ACC | CTG | 3 | C | T |
| TCGA-25-2392 | SYNC       | ENST00000373484 | p.A51V   | c.152C>T  | Verified   | GAG | GCC | CGG | 2 | C | T |
| TCGA-29-1699 | SYNCRIP    | ENST00000369622 | p.R577W  | c.1729C>T | Unverified | AAG | CGG | CGC | 1 | C | T |
| TCGA-13-0900 | SYNE2      | ENST00000358025 | p.L2522F | c.7564C>T | Verified   | GTC | CTC | AGA | 1 | C | T |
| TCGA-23-1111 | SYNE2      | ENST00000358025 | p.S285S  | c.855C>T  | Unverified | TAT | TCC | AAA | 3 | C | T |
| TCGA-61-1915 | SYNGAP1    | ENST00000418600 | p.A585V  | c.1754C>T | Unverified | ATC | GCA | GAC | 2 | C | T |
| TCGA-61-1915 | SYNGAP1_EI | ENST00000293748 | p.A585V  | c.1754C>T | Unverified | ATC | GCA | GAC | 2 | C | T |
| TCGA-61-1900 | SYNJ1      | NM_003895.2     | p.A691V  | c.2072C>T | Unverified | ttt | gct | gca | 2 | C | T |
| TCGA-61-1900 | SYNJ1_ENST | ENST00000433931 | p.A730V  | c.2189C>T | Unverified | TTT | GCT | GCA | 2 | C | T |
| TCGA-61-2012 | SYNM       | ENST00000328642 | p.D292D  | c.876C>T  | Verified   | CGG | GAC | TAT | 3 | C | T |
| TCGA-13-1507 | SYNPO2     | ENST00000307142 | p.S1022L | c.3065C>T | Verified   | GCT | TCG | TCA | 2 | C | T |
| TCGA-29-1695 | SYPL2      | ENST00000369872 | p.A115A  | c.345C>T  | Unverified | CCC | GCC | GAG | 3 | C | T |
| TCGA-29-1695 | SYPL2      | ENST00000369872 | p.F48F   | c.144C>T  | Unverified | ATT | TTC | GCC | 3 | C | T |
| TCGA-25-2392 | SYPL2      | ENST00000369872 | p.C96C   | c.288C>T  | Verified   | CTC | TGC | GAT | 3 | C | T |
| TCGA-29-1762 | SYT10      | ENST00000228567 | p.Q159*  | c.475C>T  | Unverified | GTG | CAA | AGA | 1 | C | T |

|              |            |                     |          |           |            |     |     |     |   |   |   |
|--------------|------------|---------------------|----------|-----------|------------|-----|-----|-----|---|---|---|
| TCGA-29-1693 | SYTL2      | ENST00000354566     | p.P751P  | c.2253C>T | Unverified | CAA | CCC | ATT | 3 | C | T |
| TCGA-29-1696 | SYTL2_ENST | ENST00000316356     | p.L46L   | c.136C>T  | Unverified | CAG | CTG | AAG | 1 | C | T |
| TCGA-29-1696 | SYTL2_ENST | ENST00000316356     | p.L46L   | c.136C>T  | Unverified | CAG | CTG | AAG | 1 | C | T |
| TCGA-13-1498 | SYVN1      | ENST00000377190     | p.R508C  | c.1522C>T | Verified   | CTG | CGT | AAC | 1 | C | T |
| TCGA-20-1687 | SZT2       | ENST00000372442     | p.Q2299* | c.6895C>T | Unverified | AGC | CAG | CGA | 1 | C | T |
| TCGA-20-1687 | SZT2_ENST0 | ENST00000562955     | p.Q3141* | c.9421C>T | Unverified | AGC | CAG | CGA | 1 | C | T |
| TCGA-24-2290 | TAAR8      | ENST00000275200     | p.S39S   | c.117C>T  | Verified   | TTT | AGC | TTT | 3 | C | T |
| TCGA-24-2290 | TAAR8      | ENST00000275200     | p.S39S   | c.117C>T  | Verified   | TTT | AGC | TTT | 3 | C | T |
| TCGA-13-0920 | TACC2      | ENST00000369005     | p.S408F  | c.1223C>T | Verified   | CCT | TCC | CTG | 2 | C | T |
| TCGA-13-1512 | TACC3      | ENST00000313288     | p.A148V  | c.443C>T  | Verified   | GGT | GCC | CTG | 2 | C | T |
| TCGA-30-1718 | TADA2B     | ENST00000310074     | p.Y369Y  | c.1107C>T | Unverified | CGC | TAC | GTG | 3 | C | T |
| TCGA-09-2050 | TAF1C      | ENST00000378541     | p.A655V  | c.1964C>T | Verified   | ACA | GCA | CCC | 2 | C | T |
| TCGA-25-2042 | TAF3       | ENST00000344293     | p.D565D  | c.1695C>T | Unverified | AAA | GAC | AAG | 3 | C | T |
| TCGA-24-1604 | TAF5L      | ENST00000366675     | p.P254L  | c.761C>T  | Verified   | CCT | CCC | TCC | 2 | C | T |
| TCGA-13-0886 | TAF6L      | ENST00000294168     | p.P423S  | c.1267C>T | Verified   | CCG | CCA | GGG | 1 | C | T |
| TCGA-23-1122 | TAF8       | ENST00000372977     | p.L309L  | c.927C>T  | Verified   | TCC | CTC | TCC | 3 | C | T |
| TCGA-61-1895 | TAL2_ENSTC | ENST00000334077     | p.A69V   | c.206C>T  | Unverified | GTG | GCT | GCT | 2 | C | T |
| TCGA-30-1891 | TANC1      | ENST00000263635     | p.Q1555* | c.4663C>T | Unverified | GTT | CAG | ATC | 1 | C | T |
| TCGA-29-1766 | TANC2      | ENST00000389520     | p.R1066* | c.3196C>T | Unverified | CGC | CGA | GGA | 1 | C | T |
| TCGA-29-1766 | TANC2_ENS' | ENST00000389520_v65 | p.R1066* | c.3196C>T | Unverified | CGC | CGA | GGA | 1 | C | T |
| TCGA-61-1900 | TAOK2      | ENST00000279394     | p.D376D  | c.1128C>T | Unverified | TCA | GAC | AAC | 3 | C | T |
| TCGA-61-1900 | TAOK2_ENS' | ENST00000308893     | p.D376D  | c.1128C>T | Unverified | TCA | GAC | AAC | 3 | C | T |
| TCGA-09-2049 | TAPBP      | ENST00000434618     | p.R379C  | c.1135C>T | Verified   | GCA | CGC | TAT | 1 | C | T |
| TCGA-13-1481 | TAPBP      | ENST00000434618     | p.H354Y  | c.1060C>T | Unverified | CGC | CAC | CAT | 1 | C | T |
| TCGA-61-1998 | TAPBP      | ENST00000434618     | p.A192V  | c.575C>T  | Unverified | GCC | GCC | TCA | 2 | C | T |
| TCGA-13-0885 | TARDBP     | ENST00000240185     | p.A329V  | c.986C>T  | Verified   | GCA | GCA | CTA | 2 | C | T |
| TCGA-23-1117 | TARDBP     | ENST00000240185     | p.T153M  | c.458C>T  | Verified   | TTT | ACG | GAA | 2 | C | T |
| TCGA-23-1117 | TARDBP     | ENST00000240185     | p.T153M  | c.458C>T  | Verified   | TTT | ACG | GAA | 2 | C | T |
| TCGA-13-0886 | TARS2      | ENST00000369064     | p.H367Y  | c.1099C>T | Verified   | GGG | CAC | TGG | 1 | C | T |
| TCGA-20-1683 | TAS2R38    | ENST00000547270     | p.L107L  | c.321C>T  | Unverified | AAC | CTC | TGG | 3 | C | T |
| TCGA-61-2009 | TAT        | ENST00000355962     | p.P3S    | c.7C>T    | Verified   | GAC | CCA | TAC | 1 | C | T |
| TCGA-04-1542 | TBC1D1     | ENST00000261439     | p.Q137*  | c.409C>T  | Verified   | GAT | CAA | ACA | 1 | C | T |
| TCGA-24-1422 | TBC1D1     | ENST00000261439     | p.F260F  | c.780C>T  | Unverified | GGC | TTC | TTC | 3 | C | T |
| TCGA-04-1338 | TBC1D7     | ENST00000379300     | p.R110C  | c.328C>T  | Verified   | CTC | CGC | ATG | 1 | C | T |

|              |            |                 |          |           |            |     |     |     |   |   |   |
|--------------|------------|-----------------|----------|-----------|------------|-----|-----|-----|---|---|---|
| TCGA-23-1809 | TBC1D8B    | ENST00000357242 | p.R370C  | c.1108C>T | Unverified | ttt | cgc | ttc | 1 | C | T |
| TCGA-23-1809 | TBC1D8B_EI | ENST00000310452 | p.R370C  | c.1108C>T | Unverified | TTT | CGC | TTC | 1 | C | T |
| TCGA-24-2267 | TBL3       | ENST00000568546 | p.H38Y   | c.112C>T  | Unverified | CAG | CAC | CTC | 1 | C | T |
| TCGA-04-1343 | TBR1       | ENST00000389554 | p.N154N  | c.462C>T  | Verified   | ACC | AAC | GGA | 3 | C | T |
| TCGA-04-1347 | TBX1       | ENST00000332710 | p.P197L  | c.590C>T  | Verified   | CAC | CCG | GAC | 2 | C | T |
| TCGA-30-1714 | TBX15      | ENST00000207157 | p.S349L  | c.1046C>T | Unverified | CCC | TCG | TTG | 2 | C | T |
| TCGA-23-1116 | TBX2       | ENST00000240328 | p.A648A  | c.1944C>T | Unverified | AAG | GCC | GCT | 3 | C | T |
| TCGA-04-1337 | TBX4       | ENST00000240335 | p.P380S  | c.1138C>T | Unverified | agc | ccc | tcc | 1 | C | T |
| TCGA-25-1313 | TBX5       | ENST00000310346 | p.R375W  | c.1123C>T | Verified   | CAG | CGG | CAA | 1 | C | T |
| TCGA-13-1499 | TCEAL8     | ENST00000360000 | p.S43S   | c.129C>T  | Verified   | gta | agc | cag | 3 | C | T |
| TCGA-24-1616 | TCL1B      | ENST00000340722 | p.P92P   | c.276C>T  | Verified   | TAC | CCC | GGG | 3 | C | T |
| TCGA-29-1711 | TCP11L2    | ENST00000299045 | p.S16S   | c.48C>T   | Unverified | CCA | AGC | GAT | 3 | C | T |
| TCGA-29-1711 | TCP11L2    | ENST00000299045 | p.S16S   | c.48C>T   | Unverified | CCA | AGC | GAT | 3 | C | T |
| TCGA-29-1784 | TCTE1      | ENST00000371505 | p.A66V   | c.197C>T  | Unverified | ATT | GCT | GAG | 2 | C | T |
| TCGA-04-1649 | TDRD1      | ENST00000251864 | p.R827W  | c.2479C>T | Unverified | ATA | CGG | TGC | 1 | C | T |
| TCGA-24-1849 | TDRD3      | ENST00000377894 | p.S37L   | c.110C>T  | Unverified | CTC | TCA | GGC | 2 | C | T |
| TCGA-61-2008 | TEKT5      | ENST00000283025 | p.P479L  | c.1436C>T | Verified   | ACC | CCG | CGC | 2 | C | T |
| TCGA-24-1604 | TEP1       | ENST00000262715 | p.Q1309* | c.3925C>T | Verified   | GAG | CAG | AGC | 1 | C | T |
| TCGA-13-0924 | TESK2      | NM_007170       | p.H110Y  | c.328C>T  | Verified   | tcc | cat | ccc | 1 | C | T |
| TCGA-13-0919 | TEX14      | ENST00000349033 | p.P1370L | c.4109C>T | Unverified | CAG | CCA | CCT | 2 | C | T |
| TCGA-13-0919 | TEX14_ENST | ENST00000240361 | p.P1416L | c.4247C>T | Unverified | CAG | CCA | CCT | 2 | C | T |
| TCGA-13-0920 | TEX15      | ENST00000256246 | p.L1383F | c.4147C>T | Verified   | GAG | CTT | CTA | 1 | C | T |
| TCGA-29-1770 | TFAP2B     | ENST00000393655 | p.T368M  | c.1103C>T | Unverified | TTT | ACG | GAT | 2 | C | T |
| TCGA-23-2077 | TFAP2D     | ENST00000008391 | p.P389L  | c.1166C>T | Verified   | ACT | CCG | GCA | 2 | C | T |
| TCGA-61-1900 | TFCP2L1    | ENST00000263707 | p.N360N  | c.1080C>T | Unverified | TTC | AAC | GCC | 3 | C | T |
| TCGA-24-1843 | TFRC       | ENST00000360110 | p.Y689Y  | c.2067C>T | Unverified | CCC | TAC | GTA | 3 | C | T |
| TCGA-29-1695 | TG         | ENST00000220616 | p.A2097A | c.6291C>T | Unverified | CTG | GCC | CTC | 3 | C | T |
| TCGA-29-1761 | TG         | ENST00000220616 | p.T199T  | c.597C>T  | Unverified | AAC | ACC | ACA | 3 | C | T |
| TCGA-24-2280 | TGIF2      | ENST00000373872 | p.F180F  | c.540C>T  | Unverified | CTC | TTC | AAC | 3 | C | T |
| TCGA-13-0893 | TGM6       | ENST00000202625 | p.F462F  | c.1386C>T | Verified   | CTG | TTC | GGC | 3 | C | T |
| TCGA-61-1910 | TGM6       | ENST00000202625 | p.G244G  | c.732C>T  | Unverified | GGC | GGC | GGC | 3 | C | T |
| TCGA-13-0906 | THADA      | ENST00000405975 | p.L278F  | c.832C>T  | Unverified | ctg | ctt | cgt | 1 | C | T |
| TCGA-13-0906 | THADA      | ENST00000405975 | p.R279C  | c.835C>T  | Unverified | ctt | cgt | tca | 1 | C | T |
| TCGA-23-1032 | THBS2      | ENST00000366787 | p.T99M   | c.296C>T  | Verified   | GGC | ACG | CTG | 2 | C | T |



|              |            |                 |          |           |            |     |     |     |   |   |   |
|--------------|------------|-----------------|----------|-----------|------------|-----|-----|-----|---|---|---|
| TCGA-61-1914 | THBS2      | ENST00000366787 | p.D863D  | c.2589C>T | Unverified | GAG | GAC | ATA | 3 | C | T |
| TCGA-13-0714 | THSD7B     | ENST00000272643 | p.T327I  | c.980C>T  | Verified   | TTG | ACT | GTT | 2 | C | T |
| TCGA-24-2035 | TIAL1      | ENST00000369093 | p.T126I  | c.377C>T  | Verified   | ATT | ACA | ACA | 2 | C | T |
| TCGA-23-1022 | TIAM1      | ENST00000286827 | p.S170F  | c.509C>T  | Verified   | CGC | TCC | AAA | 2 | C | T |
| TCGA-25-2391 | TIAM2      | ENST00000318981 | p.R300W  | c.898C>T  | Unverified | CTC | CGG | GAA | 1 | C | T |
| TCGA-13-1499 | TIAM2      | ENST00000318981 | p.A37V   | c.110C>T  | Verified   | CAT | GCA | AAA | 2 | C | T |
| TCGA-20-0990 | TIAM2      | ENST00000318981 | p.Y1194Y | c.3582C>T | Verified   | TAT | TAC | GCG | 3 | C | T |
| TCGA-13-0885 | TIGD6      | ENST00000296736 | p.D438D  | c.1314C>T | Verified   | CAG | GAC | ATG | 3 | C | T |
| TCGA-13-1510 | TIMM44     | ENST00000270538 | p.D373D  | c.1119C>T | Unverified | ATT | GAC | AAC | 3 | C | T |
| TCGA-24-1845 | TIMMDC1    | ENST00000494664 | p.T80M   | c.239C>T  | Unverified | AAG | ACG | GCA | 2 | C | T |
| TCGA-25-1313 | TINAG      | ENST00000259782 | p.R299C  | c.895C>T  | Verified   | AAA | CGT | GGA | 1 | C | T |
| TCGA-30-1714 | TIPARP     | ENST00000295924 | p.T6T    | c.18C>T   | Unverified | ACC | ACC | GAA | 3 | C | T |
| TCGA-29-1701 | TJP3       | ENST00000262968 | p.Q634*  | c.1900C>T | Unverified | CGA | CAG | GGC | 1 | C | T |
| TCGA-61-1913 | TLE3       | ENST00000317509 | p.P345S  | c.1033C>T | Unverified | CCT | CCG | GGC | 1 | C | T |
| TCGA-61-1913 | TLE3_ENST0 | ENST00000558939 | p.P345S  | c.1033C>T | Unverified | CCT | CCG | GGC | 1 | C | T |
| TCGA-13-1499 | TLL1       | ENST00000061240 | p.A181A  | c.543C>T  | Verified   | CAG | GCC | ATG | 3 | C | T |
| TCGA-29-1761 | TLN2       | ENST00000306829 | p.A1149A | c.3447C>T | Unverified | GCG | GCC | GCC | 3 | C | T |
| TCGA-24-1843 | TLR1       | ENST00000308979 | p.S506L  | c.1517C>T | Unverified | CCA | TCG | GCT | 2 | C | T |
| TCGA-24-1843 | TM4SF1     | ENST00000305366 | p.L125L  | c.375C>T  | Unverified | TCC | CTC | GGC | 3 | C | T |
| TCGA-61-2102 | TM7SF4     | ENST00000297581 | p.P24L   | c.71C>T   | Verified   | AGC | CCC | GGA | 2 | C | T |
| TCGA-13-1497 | TM9SF1     | ENST00000261789 | p.R221C  | c.661C>T  | Verified   | CGC | CGT | GGT | 1 | C | T |
| TCGA-24-1422 | TM9SF2     | ENST00000376387 | p.A572V  | c.1715C>T | Verified   | GAA | GCA | ACT | 2 | C | T |
| TCGA-23-1029 | TM9SF4     | ENST00000217315 | p.L587F  | c.1759C>T | Unverified | CTC | CTC | TAC | 1 | C | T |
| TCGA-29-1761 | TMCO7_ENST | ENST00000261778 | p.I223I  | c.669C>T  | Unverified | GAT | ATC | GCA | 3 | C | T |
| TCGA-61-2109 | TMEM109    | ENST00000227525 | p.L25F   | c.73C>T   | Unverified | GCC | CTT | ATC | 1 | C | T |
| TCGA-29-1691 | TMEM119    | ENST00000392806 | p.P64L   | c.191C>T  | Unverified | AGC | CCC | ACA | 2 | C | T |
| TCGA-23-1117 | TMEM119    | ENST00000392806 | p.G192G  | c.576C>T  | Verified   | CTG | GGC | GGT | 3 | C | T |
| TCGA-23-1117 | TMEM119    | ENST00000392806 | p.G192G  | c.576C>T  | Verified   | CTG | GGC | GGT | 3 | C | T |
| TCGA-20-0991 | TMEM132B   | ENST00000299308 | p.A425V  | c.1274C>T | Verified   | CTT | GCC | ATG | 2 | C | T |
| TCGA-20-0990 | TMEM132B   | ENST00000299308 | p.S562S  | c.1686C>T | Verified   | TGC | TCC | CTG | 3 | C | T |
| TCGA-13-0791 | TMEM132D   | ENST00000422113 | p.P219L  | c.656C>T  | Verified   | CAG | CCG | GAG | 2 | C | T |
| TCGA-23-1117 | TMEM132D   | ENST00000422113 | p.I267I  | c.801C>T  | Verified   | AGG | ATC | GGG | 3 | C | T |
| TCGA-23-1117 | TMEM132D   | ENST00000422113 | p.I267I  | c.801C>T  | Verified   | AGG | ATC | GGG | 3 | C | T |
| TCGA-24-1849 | TMEM132E   | ENST00000321639 | p.F787F  | c.2361C>T | Unverified | GGC | TTC | CTG | 3 | C | T |

|              |           |                 |          |           |            |     |     |     |   |   |   |
|--------------|-----------|-----------------|----------|-----------|------------|-----|-----|-----|---|---|---|
| TCGA-29-1761 | TMEM174   | ENST00000296776 | p.R7C    | c.19C>T   | Unverified | GGC | CGC | TTG | 1 | C | T |
| TCGA-23-1032 | TMEM176B  | ENST00000326442 | p.T2M    | c.5C>T    | Verified   | ATG | ACG | CAA | 2 | C | T |
| TCGA-09-1674 | TMEM177   | ENST00000272521 | p.L171L  | c.511C>T  | Unverified | GCC | CTG | CTG | 1 | C | T |
| TCGA-24-1431 | TMEM181   | ENST00000367090 | p.A142V  | c.425C>T  | Verified   | CTG | GCG | CCC | 2 | C | T |
| TCGA-61-1915 | TMEM189   | ENST00000371652 | p.A68V   | c.203C>T  | Unverified | CTG | GCC | CGC | 2 | C | T |
| TCGA-61-1915 | TMEM189-L | ENST00000341698 | p.A68V   | c.203C>T  | Unverified | CTG | GCC | CGC | 2 | C | T |
| TCGA-09-2051 | TMEM204   | ENST00000253934 | p.A9V    | c.26C>T   | Unverified | GCC | GCG | GCC | 2 | C | T |
| TCGA-13-0890 | TMEM27    | ENST00000380342 | p.P221S  | c.661C>T  | Verified   | acc | cct | ctc | 1 | C | T |
| TCGA-04-1530 | TMEM39A   | ENST00000319172 | p.V431V  | c.1293C>T | Unverified | AGT | GTC | GTC | 3 | C | T |
| TCGA-29-2427 | TMEM53    | ENST00000372237 | p.H252H  | c.756C>T  | Verified   | GCA | CAC | GTC | 3 | C | T |
| TCGA-13-0760 | TMEM63A   | ENST00000366835 | p.Q794*  | c.2380C>T | Verified   | GCG | CAG | AGC | 1 | C | T |
| TCGA-13-1498 | TMEM67    | ENST00000453321 | p.V695V  | c.2085C>T | Verified   | ACT | GTC | CTC | 3 | C | T |
| TCGA-30-1855 | TMEM69    | ENST00000372025 | p.P150S  | c.448C>T  | Unverified | CTA | CCA | GAA | 1 | C | T |
| TCGA-29-1702 | TMEM71    | ENST00000356838 | p.C48C   | c.144C>T  | Unverified | GAA | TGC | GGC | 3 | C | T |
| TCGA-24-0979 | TMPRSS4   | ENST00000437212 | p.R175C  | c.523C>T  | Unverified | CTT | CGC | ATG | 1 | C | T |
| TCGA-29-1696 | TNC       | ENST00000350763 | p.T635M  | c.1904C>T | Unverified | GTG | ACG | GAA | 2 | C | T |
| TCGA-29-1696 | TNC       | ENST00000350763 | p.T635M  | c.1904C>T | Unverified | GTG | ACG | GAA | 2 | C | T |
| TCGA-23-1022 | TNF       | ENST00000449264 | p.L151F  | c.451C>T  | Verified   | gtg | ctc | ctc | 1 | C | T |
| TCGA-61-1915 | TNFRSF11A | ENST00000269485 | p.S164F  | c.491C>T  | Unverified | ttt | tcc | tcc | 2 | C | T |
| TCGA-13-0904 | TNIP3     | ENST00000057513 | p.R215*  | c.643C>T  | Verified   | GAA | CGA | TCG | 1 | C | T |
| TCGA-29-1770 | TNKS1BP1  | ENST00000358252 | p.P1702L | c.5105C>T | Unverified | TTA | CCT | CCC | 2 | C | T |
| TCGA-04-1338 | TNNI3K    | ENST00000326637 | p.F636F  | c.1908C>T | Verified   | gtg | ttc | acg | 3 | C | T |
| TCGA-29-1769 | TNRC6A    | ENST00000395799 | p.Q1469* | c.4405C>T | Unverified | CAG | CAG | ACT | 1 | C | T |
| TCGA-29-1777 | TNS1      | ENST00000171887 | p.G1281G | c.3843C>T | Unverified | CAA | GGC | AAC | 3 | C | T |
| TCGA-04-1331 | TP53      | ENST00000269305 | p.R306*  | c.916C>T  | Verified   | AAG | CGA | GCA | 1 | C | T |
| TCGA-04-1336 | TP53      | ENST00000269305 | p.R248W  | c.742C>T  | Verified   | AAC | CGG | AGG | 1 | C | T |
| TCGA-13-0884 | TP53      | ENST00000269305 | p.R342*  | c.1024C>T | Verified   | TTC | CGA | GAG | 1 | C | T |
| TCGA-13-0887 | TP53      | ENST00000269305 | p.R213*  | c.637C>T  | Verified   | TTT | CGA | CAT | 1 | C | T |
| TCGA-13-0916 | TP53      | ENST00000269305 | p.R196*  | c.586C>T  | Verified   | ATC | CGA | GTG | 1 | C | T |
| TCGA-13-0920 | TP53      | ENST00000269305 | p.Q100*  | c.298C>T  | Verified   | TCC | CAG | AAA | 1 | C | T |
| TCGA-13-1488 | TP53      | ENST00000269305 | p.R306*  | c.916C>T  | Verified   | AAG | CGA | GCA | 1 | C | T |
| TCGA-13-1489 | TP53      | ENST00000269305 | p.R342*  | c.1024C>T | Verified   | TTC | CGA | GAG | 1 | C | T |
| TCGA-13-1499 | TP53      | ENST00000269305 | p.R273C  | c.817C>T  | Verified   | GTG | CGT | GTT | 1 | C | T |
| TCGA-13-1510 | TP53      | ENST00000269305 | p.R213*  | c.637C>T  | Verified   | TTT | CGA | CAT | 1 | C | T |

|              |            |                 |         |           |            |     |     |     |   |   |   |
|--------------|------------|-----------------|---------|-----------|------------|-----|-----|-----|---|---|---|
| TCGA-20-0990 | TP53       | ENST00000269305 | p.Q144* | c.430C>T  | Verified   | GTG | CAG | CTG | 1 | C | T |
| TCGA-23-1118 | TP53       | ENST00000269305 | p.P151S | c.451C>T  | Verified   | ACA | CCC | CCG | 1 | C | T |
| TCGA-24-1417 | TP53       | ENST00000269305 | p.R248W | c.742C>T  | Verified   | AAC | CGG | AGG | 1 | C | T |
| TCGA-24-1422 | TP53       | ENST00000269305 | p.R248W | c.742C>T  | Verified   | AAC | CGG | AGG | 1 | C | T |
| TCGA-24-1431 | TP53       | ENST00000269305 | p.Q192* | c.574C>T  | Verified   | CCT | CAG | CAT | 1 | C | T |
| TCGA-24-1474 | TP53       | ENST00000269305 | p.Q192* | c.574C>T  | Verified   | CCT | CAG | CAT | 1 | C | T |
| TCGA-24-2280 | TP53       | ENST00000269305 | p.Q192* | c.574C>T  | Verified   | CCT | CAG | CAT | 1 | C | T |
| TCGA-24-2289 | TP53       | ENST00000269305 | p.R196* | c.586C>T  | Verified   | ATC | CGA | GTG | 1 | C | T |
| TCGA-25-2392 | TP53       | ENST00000269305 | p.R273C | c.817C>T  | Verified   | GTG | CGT | GTT | 1 | C | T |
| TCGA-29-1775 | TP53       | ENST00000269305 | p.Q104* | c.310C>T  | Unverified | TAC | CAG | GGC | 1 | C | T |
| TCGA-04-1367 | TP53       | ENST00000269305 | p.S241F | c.722C>T  | Verified   | AGT | TCC | TGC | 2 | C | T |
| TCGA-13-0714 | TP53       | ENST00000269305 | p.S127F | c.380C>T  | Verified   | TAC | TCC | CCT | 2 | C | T |
| TCGA-20-0991 | TP53       | ENST00000269305 | p.S241F | c.722C>T  | Verified   | AGT | TCC | TGC | 2 | C | T |
| TCGA-23-1021 | TP53       | ENST00000269305 | p.A159V | c.476C>T  | Verified   | CGC | GCC | ATG | 2 | C | T |
| TCGA-24-2288 | TP53       | ENST00000269305 | p.P250L | c.749C>T  | Verified   | AGG | CCC | ATC | 2 | C | T |
| TCGA-13-1510 | TP53_ENSTC | ENST00000269305 | p.R213* | c.637C>T  | Verified   | TTT | CGA | CAT | 1 | C | T |
| TCGA-24-1417 | TP53_ENSTC | ENST00000269305 | p.R248W | c.742C>T  | Verified   | AAC | CGG | AGG | 1 | C | T |
| TCGA-24-1431 | TP53_ENSTC | ENST00000269305 | p.Q192* | c.574C>T  | Verified   | CCT | CAG | CAT | 1 | C | T |
| TCGA-24-2280 | TP53_ENSTC | ENST00000269305 | p.Q192* | c.574C>T  | Verified   | CCT | CAG | CAT | 1 | C | T |
| TCGA-29-1775 | TP53_ENSTC | ENST00000269305 | p.Q104* | c.310C>T  | Unverified | TAC | CAG | GGC | 1 | C | T |
| TCGA-13-1510 | TP53_ENSTC | ENST00000413465 | p.R213* | c.637C>T  | Verified   | TTT | CGA | CAT | 1 | C | T |
| TCGA-24-1417 | TP53_ENSTC | ENST00000413465 | p.R248W | c.742C>T  | Verified   | AAC | CGG | AGG | 1 | C | T |
| TCGA-24-1431 | TP53_ENSTC | ENST00000413465 | p.Q192* | c.574C>T  | Verified   | CCT | CAG | CAT | 1 | C | T |
| TCGA-24-2280 | TP53_ENSTC | ENST00000413465 | p.Q192* | c.574C>T  | Verified   | CCT | CAG | CAT | 1 | C | T |
| TCGA-29-1775 | TP53_ENSTC | ENST00000413465 | p.Q104* | c.310C>T  | Unverified | TAC | CAG | GGC | 1 | C | T |
| TCGA-13-1510 | TP53_ENSTC | ENST00000414315 | p.R81*  | c.241C>T  | Verified   | TTT | CGA | CAT | 1 | C | T |
| TCGA-24-1431 | TP53_ENSTC | ENST00000414315 | p.Q60*  | c.178C>T  | Verified   | CCT | CAG | CAT | 1 | C | T |
| TCGA-24-2280 | TP53_ENSTC | ENST00000414315 | p.Q60*  | c.178C>T  | Verified   | CCT | CAG | CAT | 1 | C | T |
| TCGA-13-1510 | TP53_ENSTC | ENST00000545858 | p.R120* | c.358C>T  | Verified   | TTT | CGA | CAT | 1 | C | T |
| TCGA-24-1431 | TP53_ENSTC | ENST00000545858 | p.Q99*  | c.295C>T  | Verified   | CCT | CAG | CAT | 1 | C | T |
| TCGA-24-2280 | TP53_ENSTC | ENST00000545858 | p.Q99*  | c.295C>T  | Verified   | CCT | CAG | CAT | 1 | C | T |
| TCGA-04-1655 | TPBG       | ENST00000369750 | p.H238H | c.714C>T  | Unverified | AGG | CAC | CTG | 3 | C | T |
| TCGA-23-1032 | TPCN1      | ENST00000335509 | p.H662Y | c.1984C>T | Unverified | TCC | CAC | TGG | 1 | C | T |
| TCGA-29-1769 | TPCN2      | ENST00000294309 | p.Q83*  | c.247C>T  | Unverified | TGC | CAA | CGG | 1 | C | T |

|              |            |                 |          |           |            |     |     |     |   |   |   |
|--------------|------------|-----------------|----------|-----------|------------|-----|-----|-----|---|---|---|
| TCGA-29-1701 | TP11       | ENST00000396705 | p.H186H  | c.558C>T  | Unverified | gta | cac | gag | 3 | C | T |
| TCGA-29-1701 | TP11_ENST0 | ENST00000229270 | p.H223H  | c.669C>T  | Unverified | GTA | CAC | GAG | 3 | C | T |
| TCGA-29-1777 | TPRG1L     | ENST00000378344 | p.L237L  | c.709C>T  | Unverified | GTG | CTG | ATC | 1 | C | T |
| TCGA-09-0369 | TRAF2      | ENST00000536468 | p.L268F  | c.802C>T  | Verified   | gag | ctc | ctg | 1 | C | T |
| TCGA-09-0369 | TRAF2      | ENST00000536468 | p.L268F  | c.802C>T  | Verified   | gag | ctc | ctg | 1 | C | T |
| TCGA-04-1362 | TRAPPC8    | ENST00000283351 | p.L913L  | c.2737C>T | Verified   | CCA | CTG | TTG | 1 | C | T |
| TCGA-61-2095 | TRAPPC8    | ENST00000283351 | p.S237L  | c.710C>T  | Verified   | GCA | TCA | GAT | 2 | C | T |
| TCGA-61-2102 | TRAPPC8    | ENST00000283351 | p.S1319L | c.3956C>T | Verified   | GAA | TCA | TTT | 2 | C | T |
| TCGA-29-1705 | TRDMT1     | ENST00000377799 | p.P173S  | c.517C>T  | Unverified | gag | cca | tta | 1 | C | T |
| TCGA-24-1469 | TREML2     | ENST00000373108 | p.P62L   | c.185C>T  | Verified   | GCC | CCA | GCC | 2 | C | T |
| TCGA-30-1855 | TRHDE      | ENST00000261180 | p.H271Y  | c.811C>T  | Unverified | ACA | CAT | GCC | 1 | C | T |
| TCGA-20-0991 | TRHDE      | ENST00000261180 | p.D500D  | c.1500C>T | Verified   | CTG | GAC | GGT | 3 | C | T |
| TCGA-20-1687 | TRIM10     | ENST00000449742 | p.C31C   | c.93C>T   | Unverified | GAC | TGC | GGC | 3 | C | T |
| TCGA-20-1687 | TRIM10_EN! | ENST00000449742 | p.C31C   | c.93C>T   | Unverified | GAC | TGC | GGC | 3 | C | T |
| TCGA-04-1347 | TRIM13     | ENST00000420995 | p.Q195*  | c.583C>T  | Verified   | gat | caa | aag | 1 | C | T |
| TCGA-24-2262 | TRIM3      | ENST00000525074 | p.G249G  | c.747C>T  | Verified   | atc | ggc | agt | 3 | C | T |
| TCGA-29-1769 | TRIM32     | ENST00000450136 | p.R238R  | c.714C>T  | Unverified | TCT | CGC | TGT | 3 | C | T |
| TCGA-24-1604 | TRIM33     | NM_015906       | p.P603S  | c.1807C>T | Verified   | ata | ccc | agg | 1 | C | T |
| TCGA-25-1326 | TRIM47     | ENST00000254816 | p.C377C  | c.1131C>T | Verified   | gcc | tgc | gtc | 3 | C | T |
| TCGA-29-1695 | TRIM60     | ENST00000512596 | p.A398V  | c.1193C>T | Unverified | gtt | gcg | tca | 2 | C | T |
| TCGA-29-1693 | TRIM7_ENS  | ENST00000393319 | p.H12Y   | c.34C>T   | Unverified | CTC | CAT | GTT | 1 | C | T |
| TCGA-13-0793 | TRIM71     | ENST00000383763 | p.G491G  | c.1473C>T | Verified   | ACA | GGC | GAT | 3 | C | T |
| TCGA-61-1907 | TRIML1     | ENST00000332517 | p.Q438*  | c.1312C>T | Unverified | TTC | CAA | GAG | 1 | C | T |
| TCGA-29-1764 | TRIOBP_ENS | ENST00000406386 | p.R727W  | c.2179C>T | Unverified | CGA | CGG | GAC | 1 | C | T |
| TCGA-24-1470 | TRIP11     | ENST00000267622 | p.L546F  | c.1636C>T | Verified   | CAA | CTT | GAA | 1 | C | T |
| TCGA-24-1469 | TRIP12     | ENST00000283943 | p.G1610G | c.4830C>T | Verified   | CTC | GGC | AGC | 3 | C | T |
| TCGA-25-2398 | TRMT1      | ENST00000357720 | p.T459I  | c.1376C>T | Verified   | AAC | ACA | CCA | 2 | C | T |
| TCGA-61-1733 | TRMT2A     | ENST00000252136 | p.L105F  | c.313C>T  | Unverified | AAA | CTC | TTT | 1 | C | T |
| TCGA-61-1733 | TRMT2A     | ENST00000252136 | p.L105F  | c.313C>T  | Unverified | AAA | CTC | TTT | 1 | C | T |
| TCGA-24-1604 | TRMT2B     | ENST00000545398 | p.Y280Y  | c.840C>T  | Verified   | ctt | tac | ttc | 3 | C | T |
| TCGA-24-1845 | TRPA1      | NM_007332.1     | p.N687N  | c.2061C>T | Unverified | ctc | aac | gca | 3 | C | T |
| TCGA-13-1499 | TRPC1      | ENST00000273482 | p.P491S  | c.1471C>T | Verified   | GGT | CCA | TTA | 1 | C | T |
| TCGA-29-1761 | TRPM3      | ENST00000377106 | p.D587D  | c.1761C>T | Unverified | CAG | GAC | GAA | 3 | C | T |
| TCGA-29-1761 | TRPM3_ENS  | ENST00000377110 | p.D715D  | c.2145C>T | Unverified | CAG | GAC | GAA | 3 | C | T |

|              |           |                 |           |            |            |     |     |     |   |   |   |
|--------------|-----------|-----------------|-----------|------------|------------|-----|-----|-----|---|---|---|
| TCGA-29-1761 | TRPM3_ENS | ENST00000423814 | p.D719D   | c.2157C>T  | Unverified | CAG | GAC | GAA | 3 | C | T |
| TCGA-23-1114 | TRPM4     | ENST00000252826 | p.R337C   | c.1009C>T  | Unverified | AGG | CGT | TTC | 1 | C | T |
| TCGA-04-1651 | TRPM8     | ENST00000324695 | p.D544D   | c.1632C>T  | Unverified | CGG | GAC | GAG | 3 | C | T |
| TCGA-04-1651 | TRPM8     | ENST00000324695 | p.D544D   | c.1632C>T  | Unverified | CGG | GAC | GAG | 3 | C | T |
| TCGA-23-1124 | TRPV3     | ENST00000576742 | p.A560V   | c.1679C>T  | Verified   | TGG | GCG | AAC | 2 | C | T |
| TCGA-24-2267 | TRPV3     | ENST00000576742 | p.Y544Y   | c.1632C>T  | Verified   | GCC | TAC | AAA | 3 | C | T |
| TCGA-61-1907 | TSHB      | ENST00000256592 | p.S137F   | c.410C>T   | Unverified | TTT | TCT | GTC | 2 | C | T |
| TCGA-25-2391 | TSNARE1   | ENST00000307180 | p.N267N   | c.801C>T   | Unverified | GCC | AAC | GTC | 3 | C | T |
| TCGA-25-2392 | TSPAN14   | ENST00000372156 | p.D121D   | c.363C>T   | Verified   | AGG | GAC | CGG | 3 | C | T |
| TCGA-24-1847 | TSPAN16   | ENST00000316737 | p.A41V    | c.122C>T   | Unverified | GGG | GCC | TCT | 2 | C | T |
| TCGA-25-1326 | TSPAN16   | ENST00000316737 | p.L47L    | c.141C>T   | Unverified | GTC | CTC | GGG | 3 | C | T |
| TCGA-04-1347 | TSSK1B    | ENST00000390666 | p.G189G   | c.567C>T   | Verified   | CAG | GGC | ATT | 3 | C | T |
| TCGA-23-1123 | TTC15     | ENST00000382110 | p.R543C   | c.1627C>T  | Verified   | TCA | CGT | CTG | 1 | C | T |
| TCGA-23-1123 | TTC15     | ENST00000382110 | p.R543C   | c.1627C>T  | Verified   | TCA | CGT | CTG | 1 | C | T |
| TCGA-29-1775 | TTC23L    | ENST00000505624 | p.A232V   | c.695C>T   | Unverified | CTA | GCT | CTG | 2 | C | T |
| TCGA-23-1031 | TTC26     | ENST00000464848 | p.V150V   | c.450C>T   | Verified   | GAT | GTC | ACA | 3 | C | T |
| TCGA-29-1690 | TTC9      | ENST00000256367 | p.R169W   | c.505C>T   | Unverified | TAC | CGG | TCT | 1 | C | T |
| TCGA-24-1849 | TLL12     | ENST00000216129 | p.P388P   | c.1164C>T  | Unverified | CTG | CCC | CGA | 3 | C | T |
| TCGA-24-1474 | TLL2      | ENST00000239587 | p.T323M   | c.968C>T   | Verified   | TGG | ACG | CTC | 2 | C | T |
| TCGA-13-0760 | TLL5      | ENST00000298832 | p.P926S   | c.2776C>T  | Verified   | ATC | CCC | AGC | 1 | C | T |
| TCGA-29-1768 | TLL8      | ENST00000266182 | p.R61W    | c.181C>T   | Unverified | GCC | CGG | GTC | 1 | C | T |
| TCGA-29-1768 | TLL8_ENST | ENST00000433387 | p.R97W    | c.289C>T   | Unverified | GCC | CGG | GTC | 1 | C | T |
| TCGA-23-1032 | TLL9      | ENST00000375938 | p.C416C   | c.1248C>T  | Verified   | GGC | TGC | GTC | 3 | C | T |
| TCGA-04-1331 | TTN       | NM_003319       | p.P10772S | c.32314C>T | Verified   | act | cca | gtt | 1 | C | T |
| TCGA-13-0792 | TTN       | NM_003319       | p.R8634C  | c.25900C>T | Verified   | ggt | cgc | cct | 1 | C | T |
| TCGA-29-1775 | TTN       | NM_003319       | p.R14835W | c.44503C>T | Unverified | ttc | cgg | gtg | 1 | C | T |
| TCGA-30-1856 | TTN       | NM_003319       | p.R6018W  | c.18052C>T | Unverified | gga | cgg | aag | 1 | C | T |
| TCGA-13-1505 | TTN       | NM_003319       | p.R25529C | c.76585C>T | Verified   | aag | cgc | atc | 1 | C | T |
| TCGA-04-1542 | TTN       | NM_003319       | p.P26166L | c.78497C>T | Verified   | tca | cca | cca | 2 | C | T |
| TCGA-24-1469 | TTN       | NM_003319       | p.S5398L  | c.16193C>T | Verified   | cat | tca | atg | 2 | C | T |
| TCGA-13-0760 | TTN       | NM_003319       | p.D6342D  | c.19026C>T | Verified   | gat | gac | gct | 3 | C | T |
| TCGA-20-1687 | TTN       | NM_003319       | p.R7163R  | c.21489C>T | Unverified | tac | cgc | gtg | 3 | C | T |
| TCGA-25-1318 | TTN       | NM_003319       | p.N24809N | c.74427C>T | Verified   | aga | aac | atc | 3 | C | T |
| TCGA-25-1318 | TTN       | NM_003319       | p.N24809N | c.74427C>T | Verified   | aga | aac | atc | 3 | C | T |

|              |            |                 |           |            |            |     |     |     |   |   |   |
|--------------|------------|-----------------|-----------|------------|------------|-----|-----|-----|---|---|---|
| TCGA-29-1761 | TTN        | NM_003319       | p.D5481D  | c.16443C>T | Unverified | caa | gac | gaa | 3 | C | T |
| TCGA-29-1775 | TTN_ENST0C | ENST00000342175 | p.R15027W | c.45079C>T | Unverified | TTC | CGG | GTG | 1 | C | T |
| TCGA-30-1856 | TTN_ENST0C | ENST00000342175 | p.R6210W  | c.18628C>T | Unverified | GGA | CGG | AAG | 1 | C | T |
| TCGA-20-1687 | TTN_ENST0C | ENST00000342175 | p.R7355R  | c.22065C>T | Unverified | TAC | CGC | GTG | 3 | C | T |
| TCGA-29-1761 | TTN_ENST0C | ENST00000342175 | p.D5673D  | c.17019C>T | Unverified | CAA | GAC | GAA | 3 | C | T |
| TCGA-29-1775 | TTN_ENST0C | ENST00000342992 | p.R21332W | c.63994C>T | Unverified | TTC | CGG | GTG | 1 | C | T |
| TCGA-30-1856 | TTN_ENST0C | ENST00000342992 | p.R12515W | c.37543C>T | Unverified | GGA | CGG | AAG | 1 | C | T |
| TCGA-20-1687 | TTN_ENST0C | ENST00000342992 | p.R13660R | c.40980C>T | Unverified | TAC | CGC | GTG | 3 | C | T |
| TCGA-29-1761 | TTN_ENST0C | ENST00000342992 | p.D11978D | c.35934C>T | Unverified | CAA | GAC | GAA | 3 | C | T |
| TCGA-04-1331 | TTN_ENST0C | ENST00000356127 | p.P17267S | c.51799C>T | Verified   | ACT | CCA | GTT | 1 | C | T |
| TCGA-13-0792 | TTN_ENST0C | ENST00000356127 | p.R15131C | c.45391C>T | Verified   | GGT | CGC | CCT | 1 | C | T |
| TCGA-29-1775 | TTN_ENST0C | ENST00000356127 | p.R21330W | c.63988C>T | Unverified | TTC | CGG | GTG | 1 | C | T |
| TCGA-30-1856 | TTN_ENST0C | ENST00000356127 | p.R12515W | c.37543C>T | Unverified | GGA | CGG | AAG | 1 | C | T |
| TCGA-13-1505 | TTN_ENST0C | ENST00000356127 | p.R32024C | c.96070C>T | Verified   | AAG | CGC | ATC | 1 | C | T |
| TCGA-04-1542 | TTN_ENST0C | ENST00000356127 | p.P32661L | c.97982C>T | Verified   | TCA | CCA | CCA | 2 | C | T |
| TCGA-09-2050 | TTN_ENST0C | ENST00000356127 | p.T3676M  | c.11027C>T | Verified   | GTT | ACG | TGG | 2 | C | T |
| TCGA-13-0920 | TTN_ENST0C | ENST00000356127 | p.P16144L | c.48431C>T | Verified   | TTC | CCG | ACA | 2 | C | T |
| TCGA-23-1032 | TTN_ENST0C | ENST00000356127 | p.A6451V  | c.19352C>T | Verified   | ACA | GCG | TTG | 2 | C | T |
| TCGA-24-1469 | TTN_ENST0C | ENST00000356127 | p.S11895L | c.35684C>T | Verified   | CAT | TCA | ATG | 2 | C | T |
| TCGA-13-0760 | TTN_ENST0C | ENST00000356127 | p.D12839D | c.38517C>T | Verified   | GAT | GAC | GCT | 3 | C | T |
| TCGA-20-1687 | TTN_ENST0C | ENST00000356127 | p.R13660R | c.40980C>T | Unverified | TAC | CGC | GTG | 3 | C | T |
| TCGA-24-1464 | TTN_ENST0C | ENST00000356127 | p.F7526F  | c.22578C>T | Verified   | TGG | TTC | AAA | 3 | C | T |
| TCGA-25-1318 | TTN_ENST0C | ENST00000356127 | p.N31304N | c.93912C>T | Verified   | AGA | AAC | ATC | 3 | C | T |
| TCGA-25-1318 | TTN_ENST0C | ENST00000356127 | p.N31304N | c.93912C>T | Verified   | AGA | AAC | ATC | 3 | C | T |
| TCGA-29-1761 | TTN_ENST0C | ENST00000356127 | p.D11978D | c.35934C>T | Unverified | CAA | GAC | GAA | 3 | C | T |
| TCGA-29-1775 | TTN_ENST0C | ENST00000359218 | p.R14960W | c.44878C>T | Unverified | TTC | CGG | GTG | 1 | C | T |
| TCGA-30-1856 | TTN_ENST0C | ENST00000359218 | p.R6143W  | c.18427C>T | Unverified | GGA | CGG | AAG | 1 | C | T |
| TCGA-20-1687 | TTN_ENST0C | ENST00000359218 | p.R7288R  | c.21864C>T | Unverified | TAC | CGC | GTG | 3 | C | T |
| TCGA-29-1761 | TTN_ENST0C | ENST00000359218 | p.D5606D  | c.16818C>T | Unverified | CAA | GAC | GAA | 3 | C | T |
| TCGA-61-2094 | TTPAL      | ENST00000262605 | p.D77D    | c.231C>T   | Unverified | CTC | GAC | GAT | 3 | C | T |
| TCGA-13-0913 | TTYH2      | ENST00000269346 | p.H359H   | c.1077C>T  | Verified   | CTT | CAC | CAG | 3 | C | T |
| TCGA-29-1785 | TUB        | ENST00000305253 | p.R419C   | c.1255C>T  | Unverified | TTA | CGT | CAG | 1 | C | T |
| TCGA-29-1785 | TUB        | ENST00000305253 | p.R419C   | c.1255C>T  | Unverified | TTA | CGT | CAG | 1 | C | T |
| TCGA-04-1652 | TUBA3C     | ENST00000400113 | p.T94T    | c.282C>T   | Unverified | ATC | ACC | GGG | 3 | C | T |

|              |           |                 |          |           |            |     |     |     |   |   |   |
|--------------|-----------|-----------------|----------|-----------|------------|-----|-----|-----|---|---|---|
| TCGA-04-1652 | TUBA3C    | ENST00000400113 | p.T94T   | c.282C>T  | Unverified | ATC | ACC | GGG | 3 | C | T |
| TCGA-04-1343 | TUBB      | ENST00000327892 | p.G140G  | c.420C>T  | Verified   | CTG | GGC | GGG | 3 | C | T |
| TCGA-24-2024 | TUBGCP6   | ENST00000248846 | p.N1112N | c.3336C>T | Verified   | TCC | AAC | GCC | 3 | C | T |
| TCGA-13-1505 | TXNDC3    | ENST00000199447 | p.A302V  | c.905C>T  | Unverified | GAT | GCT | TTC | 2 | C | T |
| TCGA-25-2042 | TXNRD2    | ENST00000400521 | p.G83G   | c.249C>T  | Unverified | CTC | GGC | GGC | 3 | C | T |
| TCGA-13-1510 | TYK2      | ENST00000525621 | p.P466P  | c.1398C>T | Unverified | CGG | CCC | GAG | 3 | C | T |
| TCGA-20-1683 | TYSND1    | ENST00000287078 | p.L526L  | c.1576C>T | Unverified | GCC | CTG | CAG | 1 | C | T |
| TCGA-24-2035 | UBASH3A   | ENST00000319294 | p.A546V  | c.1637C>T | Verified   | CCC | GCG | TTT | 2 | C | T |
| TCGA-13-0893 | UBQLN3    | ENST00000311659 | p.R218W  | c.652C>T  | Verified   | ATG | CGG | CAG | 1 | C | T |
| TCGA-24-2267 | UBQLN3    | ENST00000311659 | p.T439I  | c.1316C>T | Verified   | AGC | ACA | AAC | 2 | C | T |
| TCGA-23-1032 | UGT1A7    | ENST00000373426 | p.R254*  | c.760C>T  | Verified   | ttg | cga | act | 1 | C | T |
| TCGA-23-1124 | UGT1A8    | ENST00000373450 | p.H53Y   | c.157C>T  | Verified   | GGG | CAT | GAG | 1 | C | T |
| TCGA-04-1342 | UGT2B17   | ENST00000317746 | p.T31I   | c.92C>T   | Unverified | CCC | ACA | GAA | 2 | C | T |
| TCGA-29-1761 | UGT2B4    | ENST00000305107 | p.L498L  | c.1492C>T | Unverified | CTG | CTG | GCC | 1 | C | T |
| TCGA-61-2095 | UHRF1BP1L | ENST00000279907 | p.H78Y   | c.232C>T  | Unverified | ACA | CAT | CCC | 1 | C | T |
| TCGA-13-1512 | UMODL1    | ENST00000400424 | p.R231W  | c.691C>T  | Verified   | CCA | CGG | AAG | 1 | C | T |
| TCGA-29-1703 | UNC13A    | ENST00000428389 | p.S883L  | c.2648C>T | Unverified | GTG | TCG | GGT | 2 | C | T |
| TCGA-30-1857 | UNC13A    | ENST00000428389 | p.D1431D | c.4293C>T | Unverified | CAG | GAC | GCG | 3 | C | T |
| TCGA-29-1703 | UNC13A_EN | ENST00000519716 | p.S795L  | c.2384C>T | Unverified | GTG | TCG | GGT | 2 | C | T |
| TCGA-30-1857 | UNC13A_EN | ENST00000519716 | p.D1343D | c.4029C>T | Unverified | CAG | GAC | GCG | 3 | C | T |
| TCGA-09-2044 | UNC13B    | ENST00000378495 | p.H281Y  | c.841C>T  | Verified   | TAT | CAC | GAA | 1 | C | T |
| TCGA-61-1904 | UNC13C    | ENST00000260323 | p.R375*  | c.1123C>T | Unverified | CCT | CGA | CCC | 1 | C | T |
| TCGA-61-1904 | UNC13C_EN | ENST00000260323 | p.R375*  | c.1123C>T | Unverified | CCT | CGA | CCC | 1 | C | T |
| TCGA-04-1347 | UNC45A    | ENST00000418476 | p.T417M  | c.1250C>T | Verified   | CAG | ACG | GTG | 2 | C | T |
| TCGA-24-2267 | UNC45A    | ENST00000418476 | p.I283I  | c.849C>T  | Unverified | GCC | ATC | ATT | 3 | C | T |
| TCGA-04-1338 | UNC5B     | ENST00000335350 | p.R271W  | c.811C>T  | Verified   | ACC | CGG | ACC | 1 | C | T |
| TCGA-13-0792 | UNC5C     | ENST00000453304 | p.T506I  | c.1517C>T | Verified   | ATG | ACC | CAG | 2 | C | T |
| TCGA-30-1718 | UPB1      | ENST00000326010 | p.L133F  | c.397C>T  | Unverified | AAG | CTT | CCT | 1 | C | T |
| TCGA-13-0885 | UPB1      | ENST00000326010 | p.N206N  | c.618C>T  | Verified   | TTC | AAC | GAG | 3 | C | T |
| TCGA-13-0760 | UPF1      | ENST00000262803 | p.D298D  | c.894C>T  | Verified   | GAG | GAC | GCC | 3 | C | T |
| TCGA-13-1505 | UPF3B     | ENST00000276201 | p.R368W  | c.1102C>T | Verified   | aag | cgg | caa | 1 | C | T |
| TCGA-23-1031 | UPP1      | ENST00000331803 | p.R285C  | c.853C>T  | Unverified | CCT | CGC | AAT | 1 | C | T |
| TCGA-24-1563 | UQCR10    | ENST00000332801 | p.A3A    | c.9C>T    | Verified   | GCG | GCC | GCG | 3 | C | T |
| TCGA-24-1464 | URP2      | ENST00000345728 | p.R538C  | c.1612C>T | Verified   | CTG | CGC | TTC | 1 | C | T |

|              |            |                 |          |            |            |     |     |     |   |   |   |
|--------------|------------|-----------------|----------|------------|------------|-----|-----|-----|---|---|---|
| TCGA-13-0886 | USF1       | ENST00000368020 | p.S145L  | c.434C>T   | Verified   | GGC | TCA | GAG | 2 | C | T |
| TCGA-23-1021 | USH2A      | ENST00000307340 | p.R189C  | c.565C>T   | Verified   | TAT | CGC | ACA | 1 | C | T |
| TCGA-23-1117 | USH2A      | ENST00000307340 | p.R737*  | c.2209C>T  | Verified   | CTC | CGA | AGC | 1 | C | T |
| TCGA-23-1117 | USH2A      | ENST00000307340 | p.R737*  | c.2209C>T  | Verified   | CTC | CGA | AGC | 1 | C | T |
| TCGA-29-1698 | USH2A      | ENST00000307340 | p.R5116C | c.15346C>T | Unverified | ATC | CGC | AGC | 1 | C | T |
| TCGA-13-1497 | USP19      | XM_496642.1     | p.P362P  | c.1086C>T  | Verified   | gag | ccc | gag | 3 | C | T |
| TCGA-25-2401 | USP20_ENST | ENST00000372429 | p.P500S  | c.1498C>T  | Verified   | AAG | CCA | GGC | 1 | C | T |
| TCGA-24-1435 | USP21      | ENST00000368002 | p.A125V  | c.374C>T   | Verified   | ATT | GCC | TTG | 2 | C | T |
| TCGA-13-0755 | USP21      | ENST00000368002 | p.F222F  | c.666C>T   | Verified   | TGC | TTC | CTG | 3 | C | T |
| TCGA-29-1776 | USP32      | ENST00000300896 | p.R985*  | c.2953C>T  | Unverified | gta | cga | ctc | 1 | C | T |
| TCGA-24-1844 | USP34      | ENST00000398571 | p.H3506Y | c.10516C>T | Unverified | GGC | CAT | TCC | 1 | C | T |
| TCGA-25-1313 | USP34      | ENST00000398571 | p.P1272S | c.3814C>T  | Verified   | TTT | CCT | GGA | 1 | C | T |
| TCGA-61-1914 | USP34      | ENST00000398571 | p.Q80*   | c.238C>T   | Unverified | GAC | CAG | CTT | 1 | C | T |
| TCGA-23-1124 | USP34      | ENST00000398571 | p.S1433S | c.4299C>T  | Verified   | AAG | AGC | GCC | 3 | C | T |
| TCGA-24-2289 | USP4       | ENST00000265560 | p.P480S  | c.1438C>T  | Unverified | ctg | cca | ctg | 1 | C | T |
| TCGA-13-0904 | USP49      | ENST00000373006 | p.L496F  | c.1486C>T  | Verified   | TTG | CTC | ACT | 1 | C | T |
| TCGA-24-1469 | USP54_ENST | ENST00000408019 | p.A147V  | c.440C>T   | Verified   | ACT | GCC | CAA | 2 | C | T |
| TCGA-61-1725 | USP7       | ENST00000344836 | p.H501Y  | c.1501C>T  | Unverified | GGT | CAC | GAT | 1 | C | T |
| TCGA-09-2049 | USP7       | ENST00000344836 | p.T190I  | c.569C>T   | Verified   | GTT | ACC | TTT | 2 | C | T |
| TCGA-61-2009 | UTP14C     | ENST00000521776 | p.S462F  | c.1385C>T  | Verified   | CTA | TCT | CAG | 2 | C | T |
| TCGA-25-2393 | UTP14C     | ENST00000521776 | p.S456S  | c.1368C>T  | Verified   | CTG | TCC | GAA | 3 | C | T |
| TCGA-29-1703 | UTRN       | ENST00000367545 | p.H416H  | c.1248C>T  | Unverified | CTG | CAC | GAT | 3 | C | T |
| TCGA-13-1498 | VAR5       | ENST00000375663 | p.P1232L | c.3695C>T  | Verified   | GTG | CCG | CTC | 2 | C | T |
| TCGA-09-0369 | VAV2       | ENST00000406606 | p.A111V  | c.332C>T   | Verified   | TCC | GCG | GTG | 2 | C | T |
| TCGA-09-0369 | VAV2       | ENST00000406606 | p.A111V  | c.332C>T   | Verified   | TCC | GCG | GTG | 2 | C | T |
| TCGA-61-1740 | VEPH1      | ENST00000392832 | p.F791F  | c.2373C>T  | Unverified | ATC | TTC | ACA | 3 | C | T |
| TCGA-13-0762 | VIL1       | ENST00000248444 | p.R495C  | c.1483C>T  | Verified   | GGA | CGC | ATG | 1 | C | T |
| TCGA-13-0762 | VIL1       | ENST00000248444 | p.R495C  | c.1483C>T  | Verified   | GGA | CGC | ATG | 1 | C | T |
| TCGA-29-1766 | VIL1       | ENST00000248444 | p.I174I  | c.522C>T   | Unverified | CTT | ATC | ATC | 3 | C | T |
| TCGA-24-2280 | VLDLR      | ENST00000382100 | p.I451I  | c.1353C>T  | Unverified | GAC | ATC | AGG | 3 | C | T |
| TCGA-09-2049 | VPRBP      | ENST00000273612 | p.H25Y   | c.73C>T    | Verified   | GAA | CAT | GGC | 1 | C | T |
| TCGA-24-1849 | VPRBP      | ENST00000273612 | p.I778I  | c.2334C>T  | Unverified | CAG | ATC | ATC | 3 | C | T |
| TCGA-24-1422 | VPS13B     | ENST00000358544 | p.R3530W | c.10588C>T | Verified   | gct | cgg | tta | 1 | C | T |
| TCGA-30-1857 | VPS13B     | ENST00000358544 | p.Q323*  | c.967C>T   | Unverified | atg | caa | tat | 1 | C | T |



|              |           |                 |          |            |            |     |     |     |   |   |   |
|--------------|-----------|-----------------|----------|------------|------------|-----|-----|-----|---|---|---|
| TCGA-29-1703 | VPS13B    | ENST00000358544 | p.D3332D | c.9996C>T  | Unverified | att | gac | atc | 3 | C | T |
| TCGA-30-1857 | VPS13B_EN | ENST00000357162 | p.Q323*  | c.967C>T   | Unverified | ATG | CAA | TAT | 1 | C | T |
| TCGA-29-1703 | VPS13B_EN | ENST00000357162 | p.D3307D | c.9921C>T  | Unverified | ATT | GAC | ATC | 3 | C | T |
| TCGA-61-1914 | VPS13C    | ENST00000261517 | p.V1033V | c.3099C>T  | Unverified | CTT | GTC | GCT | 3 | C | T |
| TCGA-61-1914 | VPS13C_EN | ENST00000395896 | p.V1033V | c.3099C>T  | Unverified | CTT | GTC | GCT | 3 | C | T |
| TCGA-61-2095 | VPS13D    | ENST00000358136 | p.F4044F | c.12132C>T | Verified   | GAG | TTC | ATC | 3 | C | T |
| TCGA-29-1698 | VPS53     | ENST00000291074 | p.H108H  | c.324C>T   | Unverified | GAT | CAC | GCC | 3 | C | T |
| TCGA-29-1698 | VPS53_EN  | ENST00000437048 | p.H137H  | c.411C>T   | Unverified | GAT | CAC | GCC | 3 | C | T |
| TCGA-25-2400 | VRTN      | ENST00000256362 | p.R105W  | c.313C>T   | Unverified | CTG | CGG | GCC | 1 | C | T |
| TCGA-13-0760 | VSIG2     | ENST00000326621 | p.F261F  | c.783C>T   | Verified   | GCG | TTC | TGC | 3 | C | T |
| TCGA-29-1769 | VSIG7     | ENST00000338912 | p.S94S   | c.282C>T   | Unverified | ACA | TCC | ATG | 3 | C | T |
| TCGA-04-1356 | VWF       | ENST00000261405 | p.A1344A | c.4032C>T  | Verified   | ATT | GCC | AGC | 3 | C | T |
| TCGA-13-0904 | VWF       | ENST00000261405 | p.T286T  | c.858C>T   | Verified   | TGG | ACC | GAC | 3 | C | T |
| TCGA-23-1117 | VWF       | ENST00000261405 | p.D533D  | c.1599C>T  | Verified   | GGC | GAC | GAC | 3 | C | T |
| TCGA-23-1117 | VWF       | ENST00000261405 | p.D533D  | c.1599C>T  | Verified   | GGC | GAC | GAC | 3 | C | T |
| TCGA-29-1761 | VWF       | ENST00000261405 | p.S2285S | c.6855C>T  | Unverified | CTC | AGC | GGG | 3 | C | T |
| TCGA-25-2400 | WAS       | ENST00000376701 | p.P417S  | c.1249C>T  | Verified   | cct | cct | gct | 1 | C | T |
| TCGA-09-2051 | WBSCR17   | ENST00000333538 | p.S171S  | c.513C>T   | Unverified | CGG | TCC | GTG | 3 | C | T |
| TCGA-24-2289 | WDHD1     | ENST00000360586 | p.H667Y  | c.1999C>T  | Unverified | GAG | CAC | TGC | 1 | C | T |
| TCGA-61-1740 | WDR13     | ENST00000376729 | p.D464D  | c.1392C>T  | Unverified | TGC | GAC | GAG | 3 | C | T |
| TCGA-61-1740 | WDR13_EN  | ENST00000218056 | p.D464D  | c.1392C>T  | Unverified | TGC | GAC | GAG | 3 | C | T |
| TCGA-23-1032 | WDR16     | ENST00000352665 | p.N394N  | c.1182C>T  | Verified   | TGG | AAC | GAC | 3 | C | T |
| TCGA-29-1763 | WDR6      | ENST00000315574 | p.R1106C | c.3316C>T  | Unverified | CAC | CGT | TGT | 1 | C | T |
| TCGA-24-2289 | WDR6      | ENST00000315574 | p.T226I  | c.677C>T   | Unverified | GCT | ACA | GCT | 2 | C | T |
| TCGA-13-0755 | WDR61     | ENST00000267973 | p.L182F  | c.544C>T   | Verified   | AAA | CTT | CTG | 1 | C | T |
| TCGA-20-1683 | WDR65     | ENST00000528956 | p.L659L  | c.1975C>T  | Unverified | CTG | CTA | CGT | 1 | C | T |
| TCGA-29-1775 | WFDC12    | ENST00000372785 | p.C34C   | c.102C>T   | Unverified | GTT | TGC | CCA | 3 | C | T |
| TCGA-13-0913 | WFDC5     | ENST00000372789 | p.D47D   | c.141C>T   | Verified   | CCT | GAC | CAG | 3 | C | T |
| TCGA-13-0913 | WFIKKN2   | ENST00000311378 | p.L230F  | c.688C>T   | Verified   | TTC | CTC | TGT | 1 | C | T |
| TCGA-09-2050 | WIPF3     | ENST00000409290 | p.A48V   | c.143C>T   | Verified   | AGT | GCG | CTG | 2 | C | T |
| TCGA-13-0760 | WNK1      | NM_018979       | p.T870I  | c.2609C>T  | Verified   | att | act | cag | 2 | C | T |
| TCGA-23-1117 | WNK1      | NM_018979       | p.A1351V | c.4052C>T  | Verified   | gca | gca | gcc | 2 | C | T |
| TCGA-23-1117 | WNK1      | NM_018979       | p.A1351V | c.4052C>T  | Verified   | gca | gca | gcc | 2 | C | T |
| TCGA-13-0913 | WNK1      | NM_018979       | p.Y422Y  | c.1266C>T  | Verified   | cct | tac | tcg | 3 | C | T |

|              |                     |                 |          |           |            |     |     |     |   |   |   |
|--------------|---------------------|-----------------|----------|-----------|------------|-----|-----|-----|---|---|---|
| TCGA-30-1891 | WNK3                | ENST00000354646 | p.T489M  | c.1466C>T | Unverified | GTG | ACG | CCA | 2 | C | T |
| TCGA-20-1687 | WNT2B               | ENST00000369684 | p.R293C  | c.877C>T  | Unverified | CGC | CGT | GCC | 1 | C | T |
| TCGA-13-1507 | WNT4                | ENST00000290167 | p.R107W  | c.319C>T  | Verified   | ACT | CGG | GAG | 1 | C | T |
| TCGA-13-0760 | WNT9A               | ENST00000272164 | p.R186W  | c.556C>T  | Unverified | AGA | CGG | TCA | 1 | C | T |
| TCGA-30-1718 | WSCD1               | ENST00000317744 | p.A424V  | c.1271C>T | Unverified | TCA | GCC | ATC | 2 | C | T |
| TCGA-23-1122 | WWC2                | ENST00000403733 | p.R795*  | c.2383C>T | Verified   | CAC | CGA | AGG | 1 | C | T |
| TCGA-24-1469 | WWC2                | ENST00000403733 | p.S227F  | c.680C>T  | Verified   | AAA | TCT | ATC | 2 | C | T |
| TCGA-04-1362 | WWC3                | NM_015691.2     | p.A53A   | c.159C>T  | Verified   | ctg | gcc | cag | 3 | C | T |
| TCGA-23-1124 | XCR1                | ENST00000309285 | p.P240P  | c.720C>T  | Verified   | GGT | CCC | TAC | 3 | C | T |
| TCGA-29-1762 | XIRP1               | ENST00000340369 | p.L1219L | c.3657C>T | Unverified | GGC | CTC | CAA | 3 | C | T |
| TCGA-61-1907 | XIRP2               | ENST00000295237 | p.F736F  | c.2208C>T | Unverified | TGT | TTC | GAA | 3 | C | T |
| TCGA-13-0795 | XKR7                | ENST00000217299 | p.T497T  | c.1491C>T | Verified   | CCC | ACC | CCA | 3 | C | T |
| TCGA-23-1123 | XPO1                | ENST00000401558 | p.L255L  | c.763C>T  | Verified   | ttc | ctg | aat | 1 | C | T |
| TCGA-23-1123 | XPO1                | ENST00000401558 | p.L255L  | c.763C>T  | Verified   | ttc | ctg | aat | 1 | C | T |
| TCGA-23-1031 | XPO5                | ENST00000265351 | p.P1136P | c.3408C>T | Unverified | AAC | CCC | TCC | 3 | C | T |
| TCGA-13-0793 | XPO7                | NM_015024.2     | p.R812C  | c.2434C>T | Verified   | aat | cgc | atc | 1 | C | T |
| TCGA-29-1761 | XRCC6               | ENST00000360079 | p.T302I  | c.905C>T  | Unverified | CGG | ACC | TTT | 2 | C | T |
| TCGA-13-1496 | XRCC6BP1            | ENST00000300145 | p.C88C   | c.264C>T  | Verified   | TCT | TGC | GAA | 3 | C | T |
| TCGA-13-1507 | YBX1                | ENST00000321358 | p.P316P  | c.948C>T  | Verified   | GCT | CCC | GAG | 3 | C | T |
| TCGA-23-1124 | YES1                | ENST00000584307 | p.Q495*  | c.1483C>T | Verified   | CCT | CAG | GGC | 1 | C | T |
| TCGA-29-1691 | YLPM1               | ENST00000238571 | p.S1800S | c.5400C>T | Unverified | GAA | AGC | GAA | 3 | C | T |
| TCGA-29-1691 | YLPM1_ENS           | ENST00000325680 | p.S2035S | c.6105C>T | Unverified | GAA | AGC | GAA | 3 | C | T |
| TCGA-23-1117 | YTHDF2              | ENST00000373812 | p.R355W  | c.1063C>T | Verified   | CCT | CGG | AAC | 1 | C | T |
| TCGA-23-1117 | YTHDF2              | ENST00000373812 | p.R355W  | c.1063C>T | Verified   | CCT | CGG | AAC | 1 | C | T |
| TCGA-30-1891 | YWHAE               | ENST00000264335 | p.L44F   | c.130C>T  | Unverified | AAC | CTC | CTA | 1 | C | T |
| TCGA-61-1904 | ZAN                 | ENST00000348028 | p.L1782L | c.5344C>T | Unverified | GCC | CTG | TGC | 1 | C | T |
| TCGA-61-1904 | ZAN_ENST00000348028 | ENST00000542585 | p.L1782L | c.5344C>T | Unverified | GCC | CTG | TGC | 1 | C | T |
| TCGA-61-1904 | ZAN_ENST00000348028 | ENST00000546213 | p.L359L  | c.1075C>T | Unverified | GCC | CTG | TGC | 1 | C | T |
| TCGA-04-1343 | ZBTB22              | ENST00000418724 | p.Q50*   | c.148C>T  | Verified   | CAG | CAG | CGT | 1 | C | T |
| TCGA-29-1763 | ZBTB24              | ENST00000230122 | p.F415F  | c.1245C>T | Unverified | AAA | TTC | ATG | 3 | C | T |
| TCGA-24-2280 | ZBTB25              | ENST00000394715 | p.R94C   | c.280C>T  | Unverified | AGT | CGT | TTG | 1 | C | T |
| TCGA-09-2050 | ZBTB4               | ENST00000380599 | p.D639D  | c.1917C>T | Verified   | GAG | GAC | GAA | 3 | C | T |
| TCGA-04-1347 | ZBTB43              | ENST00000373457 | p.Y454Y  | c.1362C>T | Verified   | TCC | TAC | GAA | 3 | C | T |
| TCGA-29-1775 | ZC3H4               | ENST00000253048 | p.S76S   | c.228C>T  | Unverified | ACC | TCC | GGA | 3 | C | T |

|              |            |                 |          |           |            |     |     |     |   |   |   |
|--------------|------------|-----------------|----------|-----------|------------|-----|-----|-----|---|---|---|
| TCGA-23-1123 | ZC4H2      | ENST00000374839 | p.S40L   | c.119C>T  | Verified   | gag | tca | gag | 2 | C | T |
| TCGA-23-1123 | ZC4H2      | ENST00000374839 | p.S40L   | c.119C>T  | Verified   | gag | tca | gag | 2 | C | T |
| TCGA-13-0893 | ZCCHC16    | ENST00000340433 | p.P146L  | c.437C>T  | Verified   | AAT | CCT | CTG | 2 | C | T |
| TCGA-09-1665 | ZCCHC9     | ENST00000380199 | p.P258L  | c.773C>T  | Verified   | AAA | CCG | CAA | 2 | C | T |
| TCGA-09-2049 | ZDHHC19    | ENST00000296326 | p.A293V  | c.878C>T  | Verified   | CCA | GCC | CCA | 2 | C | T |
| TCGA-13-1497 | ZDHHC19    | ENST00000296326 | p.P16L   | c.47C>T   | Verified   | CAT | CCC | CTG | 2 | C | T |
| TCGA-29-1702 | ZEB1       | ENST00000320985 | p.C772C  | c.2316C>T | Unverified | TCT | TGC | GCA | 3 | C | T |
| TCGA-24-1846 | ZFAT       | ENST00000398946 | p.S664L  | c.1991C>T | Unverified | AGG | TCA | AAC | 2 | C | T |
| TCGA-24-1846 | ZFAT_ENSTC | ENST00000377838 | p.S676L  | c.2027C>T | Unverified | AGG | TCA | AAC | 2 | C | T |
| TCGA-23-1809 | ZFH3       | ENST00000268489 | p.R1396C | c.4186C>T | Unverified | GAT | CGC | CAT | 1 | C | T |
| TCGA-13-1488 | ZFH4       | ENST00000521891 | p.G3000G | c.9000C>T | Verified   | CAA | GGC | GGA | 3 | C | T |
| TCGA-24-1843 | ZFP14      | ENST00000270001 | p.C77C   | c.231C>T  | Unverified | TAC | TGC | CCT | 3 | C | T |
| TCGA-24-1850 | ZFP36L1    | ENST00000336440 | p.I10I   | c.30C>T   | Unverified | ACC | ATC | TTC | 3 | C | T |
| TCGA-30-1857 | ZFYVE26    | ENST00000347230 | p.L1027F | c.3079C>T | Unverified | GTT | CTT | CAG | 1 | C | T |
| TCGA-23-2077 | ZFYVE26    | ENST00000347230 | p.A539V  | c.1616C>T | Verified   | CCA | GCG | AAT | 2 | C | T |
| TCGA-13-0923 | ZIC3       | ENST00000287538 | p.D385D  | c.1155C>T | Verified   | tcg | gac | aag | 3 | C | T |
| TCGA-04-1367 | ZIM2       | ENST00000221722 | p.R68W   | c.202C>T  | Verified   | CCG | CGG | GAT | 1 | C | T |
| TCGA-13-1488 | ZIM2       | ENST00000221722 | p.R505*  | c.1513C>T | Verified   | GGC | CGA | CCC | 1 | C | T |
| TCGA-24-1850 | ZKSCAN4    | ENST00000377294 | p.Q311*  | c.931C>T  | Unverified | AAG | CAG | AAA | 1 | C | T |
| TCGA-23-1123 | ZMAT1_ENS  | ENST00000372782 | p.L134F  | c.400C>T  | Verified   | CCA | CTT | ATT | 1 | C | T |
| TCGA-23-1123 | ZMAT1_ENS  | ENST00000372782 | p.L134F  | c.400C>T  | Verified   | CCA | CTT | ATT | 1 | C | T |
| TCGA-29-1695 | ZMIZ1      | ENST00000334512 | p.T356M  | c.1067C>T | Unverified | atg | acg | ccc | 2 | C | T |
| TCGA-24-0975 | ZMIZ2      | ENST00000309315 | p.P293P  | c.879C>T  | Unverified | GCG | CCC | AGC | 3 | C | T |
| TCGA-61-1915 | ZMYM4      | ENST00000314607 | p.S390L  | c.1169C>T | Unverified | TGT | TCA | AGT | 2 | C | T |
| TCGA-13-0887 | ZMYND8     | ENST00000461685 | p.A497A  | c.1491C>T | Verified   | cca | gcc | tcc | 3 | C | T |
| TCGA-13-1510 | ZNF121     | ENST00000320451 | p.Q100*  | c.298C>T  | Unverified | GAT | CAG | TCA | 1 | C | T |
| TCGA-24-2035 | ZNF135     | ENST00000313434 | p.R514*  | c.1540C>T | Verified   | CAG | CGA | ATC | 1 | C | T |
| TCGA-23-1124 | ZNF14      | ENST00000344099 | p.H297Y  | c.889C>T  | Verified   | AGG | CAT | AAA | 1 | C | T |
| TCGA-24-1104 | ZNF16      | ENST00000394909 | p.Q102*  | c.304C>T  | Verified   | TCC | CAG | GTA | 1 | C | T |
| TCGA-13-1499 | ZNF167     | ENST00000273320 | p.R394W  | c.1180C>T | Verified   | AAT | CGG | AGT | 1 | C | T |
| TCGA-23-1123 | ZNF182     | ENST00000396965 | p.T257M  | c.770C>T  | Verified   | cat | acg | gga | 2 | C | T |
| TCGA-23-1123 | ZNF182     | ENST00000396965 | p.T257M  | c.770C>T  | Verified   | cat | acg | gga | 2 | C | T |
| TCGA-04-1338 | ZNF185     | NM_007150.1     | p.I76I   | c.228C>T  | Verified   | ttt | atc | gcg | 3 | C | T |
| TCGA-24-1431 | ZNF213     | ENST00000574902 | p.L252L  | c.754C>T  | Unverified | TCC | CTG | CTG | 1 | C | T |

|              |            |                     |          |           |            |     |     |     |   |   |   |
|--------------|------------|---------------------|----------|-----------|------------|-----|-----|-----|---|---|---|
| TCGA-29-1701 | ZNF217     | ENST00000371471     | p.P450P  | c.1350C>T | Unverified | CTT | CCC | GAA | 3 | C | T |
| TCGA-29-1701 | ZNF217_ENS | ENST00000371471     | p.P450P  | c.1350C>T | Unverified | CTT | CCC | GAA | 3 | C | T |
| TCGA-25-2400 | ZNF238     | ENST00000358704     | p.R482C  | c.1444C>T | Unverified | GAG | CGC | AGG | 1 | C | T |
| TCGA-23-1124 | ZNF263     | ENST00000219069     | p.L62L   | c.186C>T  | Verified   | CGG | CTC | CAA | 3 | C | T |
| TCGA-25-1313 | ZNF292     | ENST00000339907     | p.P1119L | c.3356C>T | Verified   | CTT | CCT | TTA | 2 | C | T |
| TCGA-61-1737 | ZNF3       | ENST00000299667     | p.S185S  | c.555C>T  | Unverified | AAT | TCC | AAC | 3 | C | T |
| TCGA-13-0905 | ZNF300     | ENST00000394226     | p.S475F  | c.1424C>T | Verified   | TTC | TCC | CGC | 2 | C | T |
| TCGA-25-2398 | ZNF319     | ENST00000299237     | p.D500D  | c.1500C>T | Unverified | TCA | GAC | CTG | 3 | C | T |
| TCGA-20-1686 | ZNF324B    | ENST00000336614     | p.P396L  | c.1187C>T | Unverified | AAG | CCC | TTC | 2 | C | T |
| TCGA-61-1904 | ZNF33A     | ENST00000307441     | p.P383L  | c.1148C>T | Unverified | AAA | CCT | TTT | 2 | C | T |
| TCGA-61-1899 | ZNF341     | ENST00000342427     | p.R73W   | c.217C>T  | Unverified | AAG | CGG | GAA | 1 | C | T |
| TCGA-24-1422 | ZNF385     | ENST00000394313     | p.R179W  | c.535C>T  | Verified   | AAG | CGG | CTG | 1 | C | T |
| TCGA-24-1422 | ZNF385A    | ENST00000551109     | p.R179W  | c.535C>T  | Verified   | AAG | CGG | CTG | 1 | C | T |
| TCGA-24-1844 | ZNF407     | ENST00000299687     | p.R321*  | c.961C>T  | Unverified | TTA | CGA | AAT | 1 | C | T |
| TCGA-24-1844 | ZNF407_ENS | ENST00000582337     | p.R321*  | c.961C>T  | Unverified | TTA | CGA | AAT | 1 | C | T |
| TCGA-61-1899 | ZNF423     | ENST00000561648     | p.L82L   | c.244C>T  | Unverified | GAC | CTG | ACG | 1 | C | T |
| TCGA-61-2102 | ZNF423     | ENST00000561648     | p.S21S   | c.63C>T   | Verified   | TCC | TCC | GTG | 3 | C | T |
| TCGA-61-1899 | ZNF423_ENS | ENST00000262383     | p.L82L   | c.244C>T  | Unverified | GAC | CTG | ACG | 1 | C | T |
| TCGA-13-0760 | ZNF498     | ENST00000394152     | p.G146G  | c.438C>T  | Verified   | AGA | GGC | GCT | 3 | C | T |
| TCGA-23-1032 | ZNF518A_EM | ENST00000371192_v61 | p.P261S  | c.781C>T  | Verified   | TTT | CCC | TTC | 1 | C | T |
| TCGA-30-1718 | ZNF521     | NM_015461.1         | p.R163C  | c.487C>T  | Unverified | gat | cgc | cac | 1 | C | T |
| TCGA-24-2262 | ZNF521     | NM_015461.1         | p.L726L  | c.2178C>T | Verified   | acc | ctc | tgc | 3 | C | T |
| TCGA-61-2012 | ZNF527     | ENST00000356178     | p.S287L  | c.860C>T  | Verified   | TAC | TCA | TTC | 2 | C | T |
| TCGA-24-2280 | ZNF546     | ENST00000347077     | p.D78D   | c.234C>T  | Unverified | CTG | GAC | GCT | 3 | C | T |
| TCGA-24-2262 | ZNF564     | ENST00000339282     | p.R157*  | c.469C>T  | Verified   | TTT | CGA | AGA | 1 | C | T |
| TCGA-20-0991 | ZNF570     | ENST00000330173     | p.P497L  | c.1490C>T | Verified   | AGA | CCC | TAT | 2 | C | T |
| TCGA-13-1496 | ZNF586     | ENST00000396154     | p.P400L  | c.1199C>T | Verified   | AGG | CCT | TAT | 2 | C | T |
| TCGA-29-1762 | ZNF592     | ENST00000299927     | p.Q903*  | c.2707C>T | Unverified | GTG | CAG | AAG | 1 | C | T |
| TCGA-13-1507 | ZNF592     | ENST00000299927     | p.H1031H | c.3093C>T | Verified   | AAA | CAC | ATC | 3 | C | T |
| TCGA-13-0795 | ZNF594     | ENST00000399604     | p.C598C  | c.1794C>T | Verified   | GAA | TGC | AAA | 3 | C | T |
| TCGA-24-2289 | ZNF597     | ENST00000301744     | p.R229*  | c.685C>T  | Unverified | TCC | CGA | CAC | 1 | C | T |
| TCGA-24-1463 | ZNF606     | ENST00000341164     | p.H694Y  | c.2080C>T | Verified   | TCT | CAC | CTC | 1 | C | T |
| TCGA-10-0930 | ZNF610     | ENST00000327920     | p.I31I   | c.93C>T   | Verified   | GCC | ATC | GAA | 3 | C | T |
| TCGA-10-0930 | ZNF610     | ENST00000327920     | p.I31I   | c.93C>T   | Verified   | GCC | ATC | GAA | 3 | C | T |

|              |            |                 |          |           |            |     |     |     |   |   |   |
|--------------|------------|-----------------|----------|-----------|------------|-----|-----|-----|---|---|---|
| TCGA-29-1777 | ZNF619     | ENST00000314686 | p.G71G   | c.213C>T  | Unverified | AAT | GGC | GTG | 3 | C | T |
| TCGA-04-1655 | ZNF627     | ENST00000361113 | p.H65Y   | c.193C>T  | Unverified | AGT | CAT | ATT | 1 | C | T |
| TCGA-30-1856 | ZNF645     | ENST00000323684 | p.A283V  | c.848C>T  | Unverified | tat | gcg | cca | 2 | C | T |
| TCGA-24-2024 | ZNF654     | ENST00000309495 | p.A18V   | c.53C>T   | Verified   | CAG | GCT | CAT | 2 | C | T |
| TCGA-24-1103 | ZNF682     | ENST00000397165 | p.A321V  | c.962C>T  | Verified   | AAA | GCC | TTT | 2 | C | T |
| TCGA-04-1342 | ZNF721     | ENST00000338977 | p.Q310*  | c.928C>T  | Verified   | AGA | CAG | TCC | 1 | C | T |
| TCGA-13-1501 | ZNF746     | ENST00000340622 | p.R31C   | c.91C>T   | Verified   | GCT | CGC | CTG | 1 | C | T |
| TCGA-13-1501 | ZNF746     | ENST00000340622 | p.R31C   | c.91C>T   | Verified   | GCT | CGC | CTG | 1 | C | T |
| TCGA-13-0885 | ZNF764     | ENST00000252797 | p.Y178Y  | c.534C>T  | Verified   | TGC | TAC | GTG | 3 | C | T |
| TCGA-13-0760 | ZNF785     | ENST00000395216 | p.T279M  | c.836C>T  | Verified   | CAC | ACG | GGC | 2 | C | T |
| TCGA-30-1891 | ZNF79      | ENST00000342483 | p.R105*  | c.313C>T  | Unverified | CTG | CGA | AGT | 1 | C | T |
| TCGA-61-2113 | ZNF79      | ENST00000342483 | p.Y389Y  | c.1167C>T | Unverified | CCC | TAC | AAG | 3 | C | T |
| TCGA-13-0923 | ZNF80      | ENST00000308095 | p.F92F   | c.276C>T  | Unverified | GAC | TTC | GTT | 3 | C | T |
| TCGA-13-1488 | ZNF800     | ENST00000393312 | p.H310Y  | c.928C>T  | Verified   | GTT | CAT | AGA | 1 | C | T |
| TCGA-09-1674 | ZNF804B    | ENST00000333190 | p.P536S  | c.1606C>T | Unverified | AAA | CCA | AAG | 1 | C | T |
| TCGA-61-1733 | ZNF816     | ENST00000357666 | p.H168H  | c.504C>T  | Unverified | CTC | CAC | ATG | 3 | C | T |
| TCGA-61-1733 | ZNF816     | ENST00000357666 | p.H168H  | c.504C>T  | Unverified | CTC | CAC | ATG | 3 | C | T |
| TCGA-13-0791 | ZNF841_ENS | ENST00000359973 | p.G291G  | c.873C>T  | Verified   | TGT | GGC | AAA | 3 | C | T |
| TCGA-13-0760 | ZNF860     | ENST00000360311 | p.A78V   | c.233C>T  | Verified   | ACA | GCG | CAA | 2 | C | T |
| TCGA-24-1470 | ZNF98      | ENST00000357774 | p.S474F  | c.1421C>T | Verified   | CAG | TCC | TCA | 2 | C | T |
| TCGA-13-1496 | ZSCAN10    | ENST00000252463 | p.R534C  | c.1600C>T | Unverified | GTG | CGC | CGG | 1 | C | T |
| TCGA-29-1701 | ZSCAN5B    | ENST00000358992 | p.N453N  | c.1359C>T | Unverified | GGG | AAC | CTG | 3 | C | T |
| TCGA-29-1701 | ZSCAN5B_EI | ENST00000358992 | p.N453N  | c.1359C>T | Unverified | GGG | AAC | CTG | 3 | C | T |
| TCGA-29-1781 | ZWILCH     | ENST00000307897 | p.P416S  | c.1246C>T | Unverified | ATT | CCA | GTT | 1 | C | T |
| TCGA-20-1687 | ZZEF1      | ENST00000381638 | p.T561M  | c.1682C>T | Unverified | CTT | ACG | GAA | 2 | C | T |
| TCGA-29-1761 | ZZZ3       | ENST00000370801 | p.A34V   | c.101C>T  | Unverified | ATT | GCG | CAT | 2 | C | T |
| TCGA-23-1029 | A1CF       | ENST00000374001 | p.R26H   | c.77G>A   | Unverified | CAG | CGC | ACA | 2 | G | A |
| TCGA-25-2398 | A2ML1      | ENST00000299698 | p.A307A  | c.921G>A  | Verified   | TAT | GCG | TAC | 3 | G | A |
| TCGA-61-1899 | ABCA1      | ENST00000374736 | p.R1897Q | c.5690G>A | Unverified | AGG | CGG | GAA | 2 | G | A |
| TCGA-61-2109 | ABCA1      | ENST00000374736 | p.W685*  | c.2055G>A | Unverified | AGC | TGG | TTC | 3 | G | A |
| TCGA-13-1499 | ABCA3      | ENST00000301732 | p.G429S  | c.1285G>A | Verified   | AAA | GGC | ATG | 1 | G | A |
| TCGA-61-1740 | ABCA3      | ENST00000301732 | p.W179*  | c.537G>A  | Unverified | GGC | TGG | CAC | 3 | G | A |
| TCGA-20-1683 | ABCA4      | ENST00000370225 | p.R1368H | c.4103G>A | Unverified | ATC | CGC | AGC | 2 | G | A |
| TCGA-29-1783 | ABCA4      | ENST00000370225 | p.G1573E | c.4718G>A | Unverified | ACG | GGG | GAA | 2 | G | A |

|              |            |                 |          |            |            |     |     |     |   |   |   |
|--------------|------------|-----------------|----------|------------|------------|-----|-----|-----|---|---|---|
| TCGA-04-1361 | ABCB4      | ENST00000359206 | p.L1205L | c.3615G>A  | Verified   | GCT | CTG | GAT | 3 | G | A |
| TCGA-04-1361 | ABCB4      | ENST00000359206 | p.L1205L | c.3615G>A  | Verified   | GCT | CTG | GAT | 3 | G | A |
| TCGA-13-0883 | ABCB5      | ENST00000258738 | p.R440H  | c.1319G>A  | Verified   | ATA | CGT | ACT | 2 | G | A |
| TCGA-04-1331 | ABCB8      | ENST00000358849 | p.G112E  | c.335G>A   | Unverified | GTG | GGG | TCT | 2 | G | A |
| TCGA-23-1032 | ABCC1      | ENST00000399410 | p.L1043L | c.3129G>A  | Unverified | ATC | TTG | GCT | 3 | G | A |
| TCGA-24-2267 | ABCC11     | ENST00000356608 | p.S835S  | c.2505G>A  | Verified   | GGC | TCG | GGG | 3 | G | A |
| TCGA-24-1470 | ABCC9      | ENST00000261200 | p.R1546H | c.4637G>A  | Verified   | GTT | CGC | GCA | 2 | G | A |
| TCGA-25-1326 | ABCC9      | ENST00000261200 | p.A825A  | c.2475G>A  | Verified   | CGA | GCG | CTG | 3 | G | A |
| TCGA-13-0905 | ABCG1      | ENST00000361802 | p.R213Q  | c.638G>A   | Verified   | ACG | CGG | ACC | 2 | G | A |
| TCGA-24-1470 | ABCG1      | ENST00000361802 | p.L440L  | c.1320G>A  | Verified   | CTG | CTG | TAC | 3 | G | A |
| TCGA-29-1769 | ABL2       | NM_005158       | p.L1111L | c.3333G>A  | Unverified | agc | ctg | cag | 3 | G | A |
| TCGA-29-1769 | ABL2_ENSTC | ENST00000502732 | p.L1147L | c.3441G>A  | Unverified | AGC | CTG | CAG | 3 | G | A |
| TCGA-29-1769 | ABL2_ENSTC | ENST00000512653 | p.L1132L | c.3396G>A  | Unverified | AGC | CTG | CAG | 3 | G | A |
| TCGA-13-0903 | ABO        | ENST00000319878 | p.?      | c.203+1G>A | Unverified | CCA | AGG | ATG | 2 | G | A |
| TCGA-13-0886 | ABR        | ENST00000302538 | p.E35K   | c.103G>A   | Unverified | AAT | GAG | GAG | 1 | G | A |
| TCGA-61-1915 | AC012100.1 | ENST00000261854 | p.?      | c.585-1G>A | Unverified | GAA | TTG | GAA | 3 | G | A |
| TCGA-13-0890 | ACACB      | ENST00000377848 | p.S1199S | c.3597G>A  | Verified   | CTG | TCG | GAC | 3 | G | A |
| TCGA-30-1857 | ACAD11     | ENST00000264990 | p.G443R  | c.1327G>A  | Unverified | AGC | GGA | CTC | 1 | G | A |
| TCGA-24-1469 | ACADM      | ENST00000370841 | p.G195R  | c.583G>A   | Verified   | AAC | GGA | GGA | 1 | G | A |
| TCGA-29-1699 | ACADM      | ENST00000370841 | p.?      | c.850-1G>A | Unverified | GTA | GTA | GCT | 1 | G | A |
| TCGA-24-1616 | ACADSB     | ENST00000358776 | p.V268I  | c.802G>A   | Verified   | AAT | GTC | AAG | 1 | G | A |
| TCGA-24-2280 | ACCN1_ENS  | ENST00000359872 | p.V50M   | c.148G>A   | Unverified | TTC | GTG | GGC | 1 | G | A |
| TCGA-24-1604 | ACE        | ENST00000290866 | p.R508Q  | c.1523G>A  | Verified   | ACC | CGA | AAC | 2 | G | A |
| TCGA-36-1577 | ACE        | ENST00000290866 | p.G1099D | c.3296G>A  | Verified   | CAG | GGC | CTC | 2 | G | A |
| TCGA-29-1698 | ACRBP      | ENST00000229243 | p.E463E  | c.1389G>A  | Unverified | ACT | GAG | TTC | 3 | G | A |
| TCGA-04-1361 | ACSL1      | ENST00000281455 | p.W611*  | c.1832G>A  | Verified   | TCC | TGG | GCC | 2 | G | A |
| TCGA-04-1361 | ACSL1      | ENST00000281455 | p.W611*  | c.1832G>A  | Verified   | TCC | TGG | GCC | 2 | G | A |
| TCGA-61-1733 | ACTL7A     | ENST00000333999 | p.T47T   | c.141G>A   | Unverified | CAT | ACG | AGT | 3 | G | A |
| TCGA-61-1733 | ACTL7A     | ENST00000333999 | p.T47T   | c.141G>A   | Unverified | CAT | ACG | AGT | 3 | G | A |
| TCGA-24-1464 | ACTL8      | ENST00000375406 | p.R365R  | c.1095G>A  | Verified   | ATG | AGG | ATG | 3 | G | A |
| TCGA-13-0919 | ACVR1C     | ENST00000243349 | p.R462H  | c.1385G>A  | Verified   | ATG | CGT | GAG | 2 | G | A |
| TCGA-13-0924 | ADAM12     | ENST00000368679 | p.G37R   | c.109G>A   | Verified   | CAA | GGA | AGA | 1 | G | A |
| TCGA-30-1718 | ADAM12     | ENST00000368679 | p.R176Q  | c.527G>A   | Unverified | GTC | CGG | GGA | 2 | G | A |
| TCGA-30-1718 | ADAM12_EM  | ENST00000368676 | p.R176Q  | c.527G>A   | Unverified | GTC | CGG | GGA | 2 | G | A |

|              |           |                 |          |           |            |     |     |     |   |   |   |
|--------------|-----------|-----------------|----------|-----------|------------|-----|-----|-----|---|---|---|
| TCGA-30-1718 | ADAM12_EN | ENST00000368679 | p.R176Q  | c.527G>A  | Unverified | GTC | CGG | GGA | 2 | G | A |
| TCGA-29-1763 | ADAM19    | NM_023038.2     | p.D186N  | c.556G>A  | Unverified | agg | gac | tgg | 1 | G | A |
| TCGA-23-1809 | ADAM19    | NM_023038.2     | p.R793Q  | c.2378G>A | Unverified | ccc | cgg | ccc | 2 | G | A |
| TCGA-29-1763 | ADAM19_EN | ENST00000257527 | p.D185N  | c.553G>A  | Unverified | AGG | GAC | TGG | 1 | G | A |
| TCGA-23-1809 | ADAM19_EN | ENST00000257527 | p.R792Q  | c.2375G>A | Unverified | CCC | CGG | CCC | 2 | G | A |
| TCGA-24-2289 | ADAM2     | ENST00000265708 | p.P30P   | c.90G>A   | Unverified | gtt | ccg | gag | 3 | G | A |
| TCGA-13-0906 | ADAM22    | ENST00000265727 | p.A3A    | c.9G>A    | Unverified | CAG | GCG | GCA | 3 | G | A |
| TCGA-13-0906 | ADAM22_EN | ENST00000398209 | p.A3A    | c.9G>A    | Unverified | CAG | GCG | GCA | 3 | G | A |
| TCGA-13-0923 | ADAM23    | ENST00000264377 | p.G578S  | c.1732G>A | Verified   | tct | ggt | cag | 1 | G | A |
| TCGA-24-1845 | ADAM30    | ENST00000369400 | p.V159I  | c.475G>A  | Unverified | gtc | gtc | tat | 1 | G | A |
| TCGA-29-1691 | ADAM30    | ENST00000369400 | p.G394R  | c.1180G>A | Unverified | cca | gga | cta | 1 | G | A |
| TCGA-13-0884 | ADAM32    | ENST00000379907 | p.P390P  | c.1170G>A | Verified   | TCT | CCG | AAA | 3 | G | A |
| TCGA-23-1114 | ADAM7     | ENST00000175238 | p.V358M  | c.1072G>A | Unverified | TGC | GTG | ATG | 1 | G | A |
| TCGA-24-2288 | ADAMTS1   | ENST00000284984 | p.G174E  | c.521G>A  | Unverified | CCA | GGG | GAG | 2 | G | A |
| TCGA-13-1408 | ADAMTS12  | ENST00000504830 | p.T144T  | c.432G>A  | Verified   | ggc | acg | gtt | 3 | G | A |
| TCGA-20-1686 | ADAMTS12  | ENST00000504830 | p.V295V  | c.885G>A  | Unverified | gtt | gtg | gtt | 3 | G | A |
| TCGA-09-0369 | ADAMTS14  | NM_139155.1     | p.G377D  | c.1130G>A | Verified   | act | ggc | atg | 2 | G | A |
| TCGA-09-0369 | ADAMTS14  | NM_139155.1     | p.G377D  | c.1130G>A | Verified   | act | ggc | atg | 2 | G | A |
| TCGA-09-1674 | ADAMTS19  | NM_133638.1     | p.R1057H | c.3170G>A | Unverified | ata | cgt | cat | 2 | G | A |
| TCGA-23-1022 | ADAMTS19  | NM_133638.1     | p.A1042A | c.3126G>A | Verified   | gag | gcg | gga | 3 | G | A |
| TCGA-24-1563 | ADAMTS20  | ENST00000389420 | p.S1031N | c.3092G>A | Verified   | TGG | AGC | GAG | 2 | G | A |
| TCGA-24-2288 | ADAMTS7   | ENST00000388820 | p.R585H  | c.1754G>A | Unverified | TTC | CGC | CTC | 2 | G | A |
| TCGA-29-1699 | ADAMTSL3  | ENST00000286744 | p.D976N  | c.2926G>A | Unverified | CCC | GAC | ATC | 1 | G | A |
| TCGA-29-1705 | ADARB1    | ENST00000360697 | p.A289A  | c.867G>A  | Unverified | GCT | GCG | CAG | 3 | G | A |
| TCGA-29-1705 | ADARB1_EN | ENST00000389863 | p.A289A  | c.867G>A  | Unverified | GCT | GCG | CAG | 3 | G | A |
| TCGA-61-1913 | ADCK4     | ENST00000324464 | p.A139T  | c.415G>A  | Unverified | AAT | GCC | GAG | 1 | G | A |
| TCGA-61-1913 | ADCK4_ENS | ENST00000324464 | p.A139T  | c.415G>A  | Unverified | AAT | GCC | GAG | 1 | G | A |
| TCGA-24-1423 | ADCY2     | ENST00000338316 | p.R238H  | c.713G>A  | Unverified | AAA | CGT | CAA | 2 | G | A |
| TCGA-24-2280 | ADD2      | ENST00000355733 | p.L191L  | c.573G>A  | Unverified | ATT | CTG | GGA | 3 | G | A |
| TCGA-23-1123 | ADNP      | ENST00000349014 | p.V690I  | c.2068G>A | Verified   | GGC | GTT | GGA | 1 | G | A |
| TCGA-23-1123 | ADNP      | ENST00000349014 | p.V690I  | c.2068G>A | Verified   | GGC | GTT | GGA | 1 | G | A |
| TCGA-13-0900 | ADORA3_EN | ENST00000369716 | p.G125G  | c.375G>A  | Verified   | CCT | GGG | TGC | 3 | G | A |
| TCGA-25-1313 | ADRA2B    | ENST00000409345 | p.R161H  | c.482G>A  | Unverified | GGG | CGC | CCC | 2 | G | A |
| TCGA-29-1761 | AEBP1     | ENST00000223357 | p.G974R  | c.2920G>A | Unverified | ATC | GGG | GCC | 1 | G | A |

|              |           |                 |          |           |            |     |     |     |   |   |   |
|--------------|-----------|-----------------|----------|-----------|------------|-----|-----|-----|---|---|---|
| TCGA-09-2049 | AFTPH     | ENST00000238856 | p.A895T  | c.2683G>A | Verified   | CCA | GCC | ACG | 1 | G | A |
| TCGA-61-1895 | AGAP1     | ENST00000304032 | p.R188K  | c.563G>A  | Unverified | CCG | AGG | GTC | 2 | G | A |
| TCGA-29-1702 | AGAP6     | ENST00000374056 | p.E28K   | c.82G>A   | Unverified | TCT | GAA | TCT | 1 | G | A |
| TCGA-24-1103 | AGTPBP1   | ENST00000376083 | p.G20R   | c.58G>A   | Verified   | GTA | GGA | CTC | 1 | G | A |
| TCGA-29-2427 | AHCTF1    | ENST00000391829 | p.E85K   | c.253G>A  | Verified   | AAA | GAA | TTC | 1 | G | A |
| TCGA-13-0906 | AHNAK     | ENST00000378024 | p.V431M  | c.1291G>A | Verified   | AAT | GTG | CCC | 1 | G | A |
| TCGA-29-1763 | AHNAK     | ENST00000378024 | p.K2978K | c.8934G>A | Unverified | GTG | AAG | GGC | 3 | G | A |
| TCGA-24-1846 | AIFM2     | ENST00000307864 | p.S258N  | c.773G>A  | Unverified | GAG | AGC | AGA | 2 | G | A |
| TCGA-24-1103 | AIFM3     | ENST00000399167 | p.S194N  | c.581G>A  | Verified   | AGT | AGC | ACC | 2 | G | A |
| TCGA-30-1856 | AIPL1     | ENST00000381129 | p.A275T  | c.823G>A  | Unverified | CAC | GCA | GAG | 1 | G | A |
| TCGA-13-1408 | AKAP2     | ENST00000374525 | p.A499T  | c.1495G>A | Verified   | ACA | GCC | TCT | 1 | G | A |
| TCGA-09-2044 | AKAP6     | ENST00000280979 | p.L441L  | c.1323G>A | Verified   | GTA | TTG | CAG | 3 | G | A |
| TCGA-61-2012 | AKAP9     | NM_147171.1     | p.V2886V | c.8658G>A | Verified   | gca | gtg | ata | 3 | G | A |
| TCGA-61-2012 | AKAP9_ENS | ENST00000356239 | p.V2874V | c.8622G>A | Verified   | GCA | GTG | ATA | 3 | G | A |
| TCGA-61-2095 | AKNA      | ENST00000307564 | p.G248D  | c.743G>A  | Verified   | GAT | GGC | AGA | 2 | G | A |
| TCGA-04-1361 | AKNAD1    | ENST00000370001 | p.P174P  | c.522G>A  | Verified   | AAC | CCG | AAA | 3 | G | A |
| TCGA-04-1361 | AKNAD1    | ENST00000370001 | p.P174P  | c.522G>A  | Verified   | AAC | CCG | AAA | 3 | G | A |
| TCGA-13-1501 | AKR1B15   | ENST00000418096 | p.E197K  | c.589G>A  | Verified   | GAC | GAG | GGG | 1 | G | A |
| TCGA-13-1501 | AKR1B15   | ENST00000418096 | p.E197K  | c.589G>A  | Verified   | GAC | GAG | GGG | 1 | G | A |
| TCGA-24-2289 | AKR1C1    | ENST00000380872 | p.A44T   | c.130G>A  | Unverified | GAA | GCT | GGC | 1 | G | A |
| TCGA-30-1855 | AKT1      | ENST00000349310 | p.S122S  | c.366G>A  | Unverified | CGG | TCG | GGC | 3 | G | A |
| TCGA-23-1110 | ALAS2     | NM_000032.1     | p.E342E  | c.1026G>A | Verified   | gag | gag | ttg | 3 | G | A |
| TCGA-24-1103 | ALDH1A1   | ENST00000297785 | p.E107E  | c.321G>A  | Verified   | atg | gag | tca | 3 | G | A |
| TCGA-13-0885 | ALDH1A1   | ENST00000297785 | p.G376G  | c.1128G>A | Verified   | tgg | ggg | aat | 3 | G | A |
| TCGA-61-1725 | ALDH1B1   | ENST00000377698 | p.R281K  | c.842G>A  | Unverified | aag | aga | gtc | 2 | G | A |
| TCGA-23-1111 | ALDH1L1   | ENST00000393434 | p.A467T  | c.1399G>A | Unverified | GCC | GCA | GCC | 1 | G | A |
| TCGA-09-1674 | ALDH1L1   | ENST00000393434 | p.E257K  | c.769G>A  | Unverified | CCC | GAG | GGA | 1 | G | A |
| TCGA-61-2113 | ALDH1L1   | ENST00000393434 | p.G628E  | c.1883G>A | Unverified | CCA | GGA | TCT | 2 | G | A |
| TCGA-20-1683 | ALDH3A1   | ENST00000225740 | p.G438D  | c.1313G>A | Unverified | gaa | ggc | ctg | 2 | G | A |
| TCGA-09-2051 | ALDH6A1   | ENST00000553458 | p.R535H  | c.1604G>A | Unverified | GGC | CGT | TAG | 2 | G | A |
| TCGA-20-1686 | ALDOA     | ENST00000338110 | p.G341E  | c.1022G>A | Unverified | caa | gga | aag | 2 | G | A |
| TCGA-09-1674 | ALG1      | ENST00000262374 | p.G145S  | c.433G>A  | Unverified | GTG | GGC | TGC | 1 | G | A |
| TCGA-04-1655 | ALG1      | ENST00000262374 | p.G407D  | c.1220G>A | Unverified | AAT | GGC | CTG | 2 | G | A |
| TCGA-24-2035 | ALG10B    | ENST00000308742 | p.M249I  | c.747G>A  | Verified   | AGT | ATG | CTT | 3 | G | A |



|              |            |                 |          |             |            |     |     |     |   |   |   |
|--------------|------------|-----------------|----------|-------------|------------|-----|-----|-----|---|---|---|
| TCGA-13-1489 | ALG9       | ENST00000531154 | p.G123E  | c.368G>A    | Verified   | CAT | GGA | CCT | 2 | G | A |
| TCGA-61-1740 | ALK        | ENST00000389048 | p.?      | c.3515+1G>A | Unverified | atc | agc | aaa | 2 | G | A |
| TCGA-25-1313 | ALK        | ENST00000389048 | p.P1112P | c.3336G>A   | Unverified | gtg | ccg | cgg | 3 | G | A |
| TCGA-04-1342 | ALKBH1     | ENST00000216489 | p.D142N  | c.424G>A    | Verified   | CAA | GAT | CTG | 1 | G | A |
| TCGA-23-1114 | ALMS1      | ENST00000264448 | p.D844N  | c.2530G>A   | Unverified | GCT | GAC | GGA | 1 | G | A |
| TCGA-24-1849 | ALOX15B    | ENST00000380183 | p.L402L  | c.1206G>A   | Unverified | ctg | ctg | atc | 3 | G | A |
| TCGA-04-1652 | ALOX5      | ENST00000374391 | p.E147K  | c.439G>A    | Unverified | atg | gag | tgg | 1 | G | A |
| TCGA-04-1652 | ALOX5      | ENST00000374391 | p.E147K  | c.439G>A    | Unverified | atg | gag | tgg | 1 | G | A |
| TCGA-04-1336 | ALPK1      | ENST00000458497 | p.G487R  | c.1459G>A   | Verified   | ACA | GGA | GTC | 1 | G | A |
| TCGA-29-1695 | ALPK1      | ENST00000458497 | p.T305T  | c.915G>A    | Unverified | GGC | ACG | TGT | 3 | G | A |
| TCGA-30-1857 | ALX1       | ENST00000316824 | p.E112E  | c.336G>A    | Unverified | CAA | GAG | AAG | 3 | G | A |
| TCGA-30-1855 | AMAC1      | ENST00000297307 | p.D158N  | c.472G>A    | Unverified | TAC | GAC | TGG | 1 | G | A |
| TCGA-61-2012 | AMIGO1     | ENST00000369862 | p.L265L  | c.795G>A    | Verified   | AAC | CTG | AGT | 3 | G | A |
| TCGA-25-1318 | AMIGO2     | ENST00000266581 | p.L140L  | c.420G>A    | Verified   | GAG | TTG | AAG | 3 | G | A |
| TCGA-25-1318 | AMIGO2     | ENST00000266581 | p.L140L  | c.420G>A    | Verified   | GAG | TTG | AAG | 3 | G | A |
| TCGA-24-1847 | ANGEL1     | ENST00000251089 | p.G432R  | c.1294G>A   | Unverified | TGC | GGG | GAC | 1 | G | A |
| TCGA-13-1497 | ANGPT4     | ENST00000381922 | p.R379H  | c.1136G>A   | Verified   | CTG | CGT | GTG | 2 | G | A |
| TCGA-61-1913 | ANK1       | ENST00000347528 | p.C1357Y | c.4070G>A   | Unverified | ctc | tgc | cac | 2 | G | A |
| TCGA-61-1913 | ANK1_ENSTI | ENST00000265709 | p.C1398Y | c.4193G>A   | Unverified | CTC | TGC | CAC | 2 | G | A |
| TCGA-09-2050 | ANK3       | ENST00000280772 | p.V373V  | c.1119G>A   | Verified   | CAC | GTG | GCT | 3 | G | A |
| TCGA-13-0893 | ANKHD1     | ENST00000360839 | p.A2383T | c.7147G>A   | Verified   | gtt | gca | caa | 1 | G | A |
| TCGA-23-1118 | ANKHD1     | ENST00000360839 | p.K1462K | c.4386G>A   | Verified   | aaa | aag | aaa | 3 | G | A |
| TCGA-13-0893 | ANKHD1-EIF | ENST00000297183 | p.A2383T | c.7147G>A   | Verified   | GTT | GCA | CAA | 1 | G | A |
| TCGA-23-1118 | ANKHD1-EIF | ENST00000297183 | p.K1462K | c.4386G>A   | Verified   | AAA | AAG | AAA | 3 | G | A |
| TCGA-29-1777 | ANKRD11    | ENST00000301030 | p.K59K   | c.177G>A    | Unverified | CGG | AAG | CTG | 3 | G | A |
| TCGA-04-1342 | ANKRD12    | ENST00000262126 | p.A138T  | c.412G>A    | Verified   | ATG | GCA | CTT | 1 | G | A |
| TCGA-29-1690 | ANKRD13C   | ENST00000370944 | p.E424K  | c.1270G>A   | Unverified | GAA | GAA | TAT | 1 | G | A |
| TCGA-04-1530 | ANKRD17    | NM_032217.3     | p.G2330S | c.6988G>A   | Unverified | tat | ggt | tct | 1 | G | A |
| TCGA-29-1703 | ANKRD26    | ENST00000376087 | p.Q64Q   | c.192G>A    | Unverified | CAG | CAG | ATC | 3 | G | A |
| TCGA-30-1891 | ANKRD28_E  | ENST00000383777 | p.L475L  | c.1425G>A   | Unverified | CCA | CTG | CAC | 3 | G | A |
| TCGA-13-1481 | ANKRD33    | ENST00000301190 | p.S334S  | c.1002G>A   | Unverified | CCT | TCG | CTG | 3 | G | A |
| TCGA-04-1652 | ANKRD34B   | ENST00000338682 | p.A245T  | c.733G>A    | Unverified | CAC | GCT | CCA | 1 | G | A |
| TCGA-04-1652 | ANKRD34B   | ENST00000338682 | p.A245T  | c.733G>A    | Unverified | CAC | GCT | CCA | 1 | G | A |
| TCGA-13-0883 | ANKRD35    | ENST00000355594 | p.E914K  | c.2740G>A   | Verified   | AAA | GAG | AAG | 1 | G | A |

|              |            |                 |          |           |            |     |     |     |   |   |   |
|--------------|------------|-----------------|----------|-----------|------------|-----|-----|-----|---|---|---|
| TCGA-13-1507 | ANKRD44    | NM_153697.1     | p.G711R  | c.2131G>A | Verified   | aga | ggg | agg | 1 | G | A |
| TCGA-13-0903 | ANKRD44    | NM_153697.1     | p.L783L  | c.2349G>A | Verified   | cca | ctg | cac | 3 | G | A |
| TCGA-30-1891 | ANKRD57    | ENST00000356454 | p.A363T  | c.1087G>A | Unverified | GGG | GCC | TAC | 1 | G | A |
| TCGA-25-2393 | ANO1       | ENST00000355303 | p.M378I  | c.1134G>A | Verified   | ACC | ATG | TGC | 3 | G | A |
| TCGA-13-0791 | ANO4       | ENST00000392979 | p.G581R  | c.1741G>A | Verified   | CTC | GGA | AGA | 1 | G | A |
| TCGA-04-1367 | ANP32C     | ENST00000330241 | p.E192E  | c.576G>A  | Unverified | GAG | GAG | GAA | 3 | G | A |
| TCGA-24-1469 | ANTXR1     | ENST00000303714 | p.A192T  | c.574G>A  | Verified   | ATT | GCG | GAC | 1 | G | A |
| TCGA-29-1696 | AP001011.2 | ENST00000261598 | p.G910D  | c.2729G>A | Unverified | CCT | GGC | TTA | 2 | G | A |
| TCGA-29-1696 | AP001011.2 | ENST00000261598 | p.G910D  | c.2729G>A | Unverified | CCT | GGC | TTA | 2 | G | A |
| TCGA-29-1696 | AP001011.3 | ENST00000320876 | p.G910D  | c.2729G>A | Unverified | CCT | GGC | TTA | 2 | G | A |
| TCGA-29-1696 | AP001011.3 | ENST00000320876 | p.G910D  | c.2729G>A | Unverified | CCT | GGC | TTA | 2 | G | A |
| TCGA-61-1915 | AP1G2      | ENST00000397120 | p.D41N   | c.121G>A  | Unverified | CGC | GAC | GGG | 1 | G | A |
| TCGA-09-0369 | AP1M1      | ENST00000291439 | p.V25M   | c.73G>A   | Verified   | GAC | GTG | GAC | 1 | G | A |
| TCGA-09-0369 | AP1M1      | ENST00000291439 | p.V25M   | c.73G>A   | Verified   | GAC | GTG | GAC | 1 | G | A |
| TCGA-23-1120 | AP2A2      | ENST00000448903 | p.R515K  | c.1544G>A | Unverified | CCG | AGA | TCC | 2 | G | A |
| TCGA-09-1665 | APAF1      | ENST00000551964 | p.D479N  | c.1435G>A | Verified   | gaa | gac | tgt | 1 | G | A |
| TCGA-23-1022 | APC        | ENST00000457016 | p.G1120E | c.3359G>A | Verified   | CAT | GGA | ATT | 2 | G | A |
| TCGA-04-1367 | APCS       | ENST00000255040 | p.L133L  | c.399G>A  | Verified   | CCT | TTG | GTG | 3 | G | A |
| TCGA-13-1507 | APEX1      | ENST00000555414 | p.R193H  | c.578G>A  | Verified   | ttt | cgc | aag | 2 | G | A |
| TCGA-36-1577 | APOB       | ENST00000233242 | p.G1227S | c.3679G>A | Unverified | GTG | GGT | TCC | 1 | G | A |
| TCGA-61-1914 | APOBEC1    | ENST00000229304 | p.E41K   | c.121G>A  | Unverified | tac | gaa | atc | 1 | G | A |
| TCGA-29-1703 | APOBR      | ENST00000328423 | p.V993M  | c.2977G>A | Unverified | CGC | GTG | CAC | 1 | G | A |
| TCGA-23-1110 | ARAP2      | ENST00000303965 | p.L45L   | c.135G>A  | Verified   | AGC | CTG | CTG | 3 | G | A |
| TCGA-25-1326 | ARFGEF1    | ENST00000262215 | p.V1305I | c.3913G>A | Verified   | att | gtc | acc | 1 | G | A |
| TCGA-23-1021 | ARHGAP21   | NM_020824.2     | p.T1551T | c.4653G>A | Verified   | agc | acg | tct | 3 | G | A |
| TCGA-61-1910 | ARHGAP26   | ENST00000274498 | p.R171R  | c.513G>A  | Unverified | GTC | CGG | CAG | 3 | G | A |
| TCGA-20-1686 | ARHGAP31   | ENST00000264245 | p.V1075M | c.3223G>A | Unverified | AGC | GTG | CAG | 1 | G | A |
| TCGA-29-1769 | ARHGAP31   | ENST00000264245 | p.E1070K | c.3208G>A | Unverified | AAG | GAG | AGT | 1 | G | A |
| TCGA-13-1488 | ARHGAP33   | ENST00000314737 | p.G668S  | c.2002G>A | Verified   | ccc | ggc | cgg | 1 | G | A |
| TCGA-24-1435 | ARHGAP5    | ENST00000345122 | p.V474I  | c.1420G>A | Verified   | GAG | GTA | TAT | 1 | G | A |
| TCGA-13-1499 | ARHGEF1    | ENST00000337665 | p.A76T   | c.226G>A  | Verified   | atg | gcc | ctc | 1 | G | A |
| TCGA-29-1770 | ARHGEF1    | ENST00000337665 | p.T812T  | c.2436G>A | Unverified | gag | acg | tct | 3 | G | A |
| TCGA-29-1701 | ARHGEF10   | NM_014629.1     | p.V819I  | c.2455G>A | Unverified | ggc | gtc | cta | 1 | G | A |
| TCGA-24-2289 | ARHGEF10_  | ENST00000349830 | p.E115K  | c.343G>A  | Unverified | GAG | GAG | AAT | 1 | G | A |

|              |            |                 |          |            |            |     |     |     |   |   |   |
|--------------|------------|-----------------|----------|------------|------------|-----|-----|-----|---|---|---|
| TCGA-29-1701 | ARHGEF10_  | ENST00000349830 | p.V1042I | c.3124G>A  | Unverified | GGC | GTC | CTA | 1 | G | A |
| TCGA-04-1361 | ARHGEF10L  | ENST00000361221 | p.A420T  | c.1258G>A  | Verified   | AGT | GCC | ATG | 1 | G | A |
| TCGA-04-1361 | ARHGEF10L  | ENST00000361221 | p.A420T  | c.1258G>A  | Verified   | AGT | GCC | ATG | 1 | G | A |
| TCGA-13-0924 | ARHGEF11   | ENST00000368194 | p.D1350N | c.4048G>A  | Verified   | gaa | gat | gct | 1 | G | A |
| TCGA-24-1850 | ARHGEF11   | ENST00000368194 | p.V1132I | c.3394G>A  | Unverified | ccc | gtc | cat | 1 | G | A |
| TCGA-13-0887 | ARHGEF16   | NM_014448.2     | p.E77E   | c.231G>A   | Verified   | gag | gag | cac | 3 | G | A |
| TCGA-29-1695 | ARHGEF26   | ENST00000356448 | p.E229K  | c.685G>A   | Unverified | CTC | GAG | AAT | 1 | G | A |
| TCGA-29-1695 | ARHGEF26_  | ENST00000356448 | p.E229K  | c.685G>A   | Unverified | CTC | GAG | AAT | 1 | G | A |
| TCGA-13-0919 | ARHGEF37   | ENST00000333677 | p.W671*  | c.2013G>A  | Unverified | GGC | TGG | AGT | 3 | G | A |
| TCGA-23-1032 | ARID4B     | ENST00000366603 | p.W935*  | c.2805G>A  | Verified   | cag | tgg | cct | 3 | G | A |
| TCGA-23-1032 | ARID4B_ENS | ENST00000264183 | p.W935*  | c.2805G>A  | Verified   | CAG | TGG | CCT | 3 | G | A |
| TCGA-25-1326 | ARIH1      | ENST00000379887 | p.?      | c.681+1G>A | Unverified | GGT | CAG | ACT | 3 | G | A |
| TCGA-20-1685 | ARL5B      | ENST00000377275 | p.G49E   | c.146G>A   | Unverified | ata | gga | agc | 2 | G | A |
| TCGA-61-1998 | ARMC6      | ENST00000269932 | p.G420S  | c.1258G>A  | Unverified | CAC | GGC | CAG | 1 | G | A |
| TCGA-24-1604 | ARMC9      | ENST00000349938 | p.D117N  | c.349G>A   | Verified   | CCG | GAC | AAA | 1 | G | A |
| TCGA-13-1505 | ARMCX2     | ENST00000330154 | p.A330T  | c.988G>A   | Verified   | cag | gct | ttc | 1 | G | A |
| TCGA-25-2398 | ARMCX2     | ENST00000330154 | p.V145V  | c.435G>A   | Verified   | ggg | gtg | aca | 3 | G | A |
| TCGA-20-1687 | ARNT2      | ENST00000303329 | p.T217T  | c.651G>A   | Unverified | GGG | ACG | GTC | 3 | G | A |
| TCGA-30-1718 | ARPC1B     | ENST00000252725 | p.V45M   | c.133G>A   | Unverified | AAG | GTG | CAC | 1 | G | A |
| TCGA-13-0714 | ARPP21     | ENST00000187397 | p.Q751Q  | c.2253G>A  | Verified   | AAC | CAG | GCA | 3 | G | A |
| TCGA-24-1844 | ARRDC3     | ENST00000265138 | p.R251H  | c.752G>A   | Unverified | TTG | CGT | GGG | 2 | G | A |
| TCGA-24-1844 | ARSI       | ENST00000328668 | p.V415M  | c.1243G>A  | Unverified | GCC | GTG | CAG | 1 | G | A |
| TCGA-29-1781 | ART1       | ENST00000250693 | p.R30Q   | c.89G>A    | Unverified | CGA | CGA | GAC | 2 | G | A |
| TCGA-29-1783 | ASAH2_ENS  | ENST00000395526 | p.D159N  | c.475G>A   | Unverified | ATC | GAC | ATA | 1 | G | A |
| TCGA-24-2280 | ASB2       | ENST00000315988 | p.A214T  | c.640G>A   | Unverified | GGA | GCC | AAG | 1 | G | A |
| TCGA-24-1463 | ASPM       | ENST00000367409 | p.R2111K | c.6332G>A  | Verified   | AGA | AGA | CAT | 2 | G | A |
| TCGA-04-1347 | ASPM       | ENST00000367409 | p.K2575K | c.7725G>A  | Verified   | CAA | AAG | CTT | 3 | G | A |
| TCGA-24-1616 | ASTN1      | ENST00000361833 | p.Q1174Q | c.3522G>A  | Verified   | cag | cag | acc | 3 | G | A |
| TCGA-13-0761 | ASTN2      | ENST00000361209 | p.A489T  | c.1465G>A  | Verified   | TAT | GCC | CCT | 1 | G | A |
| TCGA-13-0761 | ASTN2      | ENST00000361209 | p.A489T  | c.1465G>A  | Verified   | TAT | GCC | CCT | 1 | G | A |
| TCGA-29-1764 | ASXL2      | ENST00000272341 | p.L132L  | c.396G>A   | Unverified | AAA | TTG | ACA | 3 | G | A |
| TCGA-29-1764 | ASXL2_ENST | ENST00000435504 | p.L392L  | c.1176G>A  | Unverified | AAA | TTG | ACA | 3 | G | A |
| TCGA-29-1695 | ATG4D      | ENST00000309469 | p.A282T  | c.844G>A   | Unverified | AAG | GCG | GAT | 1 | G | A |
| TCGA-29-1785 | ATP10B     | ENST00000327245 | p.K972K  | c.2916G>A  | Unverified | CGC | AAG | CTC | 3 | G | A |

|              |            |                 |          |             |            |     |     |     |   |   |   |
|--------------|------------|-----------------|----------|-------------|------------|-----|-----|-----|---|---|---|
| TCGA-29-1785 | ATP10B     | ENST00000327245 | p.K972K  | c.2916G>A   | Unverified | CGC | AAG | CTC | 3 | G | A |
| TCGA-24-2267 | ATP11C     | ENST00000327569 | p.?      | c.246+1G>A  | Verified   | GTA | CAG | GTC | 3 | G | A |
| TCGA-61-1906 | ATP1A4     | ENST00000368081 | p.?      | c.1855-1G>A | Unverified | AAG | GTG | ATC | 1 | G | A |
| TCGA-61-1906 | ATP1A4     | ENST00000368081 | p.?      | c.1855-1G>A | Unverified | AAG | GTG | ATC | 1 | G | A |
| TCGA-13-0890 | ATP2A1     | ENST00000357084 | p.E381K  | c.1141G>A   | Verified   | AAT | GAG | TTC | 1 | G | A |
| TCGA-13-1505 | ATP2A1     | ENST00000357084 | p.A547A  | c.1641G>A   | Verified   | ATG | GCG | GTG | 3 | G | A |
| TCGA-24-1844 | ATP2B2     | ENST00000383800 | p.S425S  | c.1275G>A   | Unverified | TAT | TCG | GTG | 3 | G | A |
| TCGA-24-1844 | ATP2B2_EN! | ENST00000360273 | p.S470S  | c.1410G>A   | Unverified | TAT | TCG | GTG | 3 | G | A |
| TCGA-23-1117 | ATP2B3_EN! | ENST00000349466 | p.V1216M | c.3646G>A   | Verified   | AGC | GTG | GAG | 1 | G | A |
| TCGA-23-1117 | ATP2B3_EN! | ENST00000349466 | p.V1216M | c.3646G>A   | Verified   | AGC | GTG | GAG | 1 | G | A |
| TCGA-29-1695 | ATP2C2     | ENST00000262429 | p.G819R  | c.2455G>A   | Unverified | AGC | GGG | ACC | 1 | G | A |
| TCGA-29-1783 | ATP5A1     | ENST00000398752 | p.M105I  | c.315G>A    | Unverified | GGT | ATG | TCC | 3 | G | A |
| TCGA-29-1784 | ATP5J2     | ENST00000292475 | p.K59K   | c.177G>A    | Unverified | GTG | AAG | AAG | 3 | G | A |
| TCGA-13-0755 | ATP5S      | ENST00000311459 | p.L214L  | c.642G>A    | Verified   | CAA | TTG | AAG | 3 | G | A |
| TCGA-61-1915 | ATP6V0D2   | ENST00000285393 | p.A5A    | c.15G>A     | Unverified | GGT | GCG | GAG | 3 | G | A |
| TCGA-25-2392 | ATP6V1A    | ENST00000273398 | p.Q494Q  | c.1482G>A   | Verified   | GTA | CAG | CTT | 3 | G | A |
| TCGA-09-0369 | ATP6V1D    | ENST00000554087 | p.E242K  | c.724G>A    | Verified   | gac | gag | gat | 1 | G | A |
| TCGA-09-0369 | ATP6V1D    | ENST00000554087 | p.E242K  | c.724G>A    | Verified   | gac | gag | gat | 1 | G | A |
| TCGA-23-1116 | ATP6V1E2   | ENST00000306448 | p.R135H  | c.404G>A    | Verified   | GTA | CGC | TGC | 2 | G | A |
| TCGA-29-1764 | ATP8A2     | ENST00000381655 | p.G827R  | c.2479G>A   | Unverified | GTC | GGG | ATG | 1 | G | A |
| TCGA-13-1512 | ATP8A2     | ENST00000381655 | p.R1139Q | c.3416G>A   | Unverified | GGC | CGG | AAG | 2 | G | A |
| TCGA-24-2262 | ATP9A      | ENST00000338821 | p.V800M  | c.2398G>A   | Verified   | GGC | GTG | GGA | 1 | G | A |
| TCGA-04-1530 | ATP9A      | ENST00000338821 | p.R556Q  | c.1667G>A   | Unverified | GTG | CGG | GAT | 2 | G | A |
| TCGA-13-1489 | ATXN3L     | ENST00000380622 | p.R237H  | c.710G>A    | Verified   | agc | cgc | caa | 2 | G | A |
| TCGA-61-2094 | AUTS2      | ENST00000342771 | p.A996T  | c.2986G>A   | Unverified | GAG | GCC | CCG | 1 | G | A |
| TCGA-61-1904 | AVP        | ENST00000380293 | p.P26P   | c.78G>A     | Unverified | TGC | CCG | AGG | 3 | G | A |
| TCGA-24-2035 | AXIN1      | ENST00000262320 | p.Q706Q  | c.2118G>A   | Unverified | acc | cag | ctg | 3 | G | A |
| TCGA-61-1915 | B3GALNT1   | ENST00000392779 | p.V91M   | c.271G>A    | Unverified | GAT | GTG | AAA | 1 | G | A |
| TCGA-29-1702 | B3GNT1     | ENST00000311181 | p.V330M  | c.988G>A    | Unverified | TAC | GTG | GCA | 1 | G | A |
| TCGA-24-2289 | B3GNT4     | ENST00000324189 | p.D180N  | c.538G>A    | Unverified | GAT | GAC | ATC | 1 | G | A |
| TCGA-61-2009 | B3GNT4     | ENST00000324189 | p.R133Q  | c.398G>A    | Verified   | GAG | CGA | CGT | 2 | G | A |
| TCGA-61-1740 | BAG1       | ENST00000472232 | p.G219R  | c.655G>A    | Unverified | TTG | GAG | GAG | 1 | G | A |
| TCGA-61-1998 | BAI2       | ENST00000373658 | p.V687M  | c.2059G>A   | Unverified | CAG | GTG | TCC | 1 | G | A |
| TCGA-25-2400 | BAI2       | ENST00000373658 | p.L1406L | c.4218G>A   | Unverified | GGC | CTG | GGG | 3 | G | A |

|              |            |                 |          |             |            |     |     |     |   |   |   |
|--------------|------------|-----------------|----------|-------------|------------|-----|-----|-----|---|---|---|
| TCGA-61-1907 | BAIAP2L2   | ENST00000381669 | p.E180K  | c.538G>A    | Unverified | GAA | GAG | AAG | 1 | G | A |
| TCGA-13-0795 | BATF2      | ENST00000301887 | p.Q102Q  | c.306G>A    | Verified   | GAC | CAG | GCT | 3 | G | A |
| TCGA-25-2393 | BCORL1     | ENST00000218147 | p.E692K  | c.2074G>A   | Verified   | ccc | gag | atc | 1 | G | A |
| TCGA-13-1481 | BDKRB2     | ENST00000554311 | p.G388E  | c.1163G>A   | Verified   | GCA | GGG | AGC | 2 | G | A |
| TCGA-13-1496 | BDKRB2     | ENST00000554311 | p.R196Q  | c.587G>A    | Verified   | TTC | CGG | ACC | 2 | G | A |
| TCGA-13-0920 | BEND2      | ENST00000380033 | p.V49I   | c.145G>A    | Verified   | TAT | GTC | ACA | 1 | G | A |
| TCGA-13-1510 | BEND3      | ENST00000369042 | p.D507N  | c.1519G>A   | Unverified | GAC | GAC | ATC | 1 | G | A |
| TCGA-04-1362 | BEND3      | ENST00000369042 | p.L219L  | c.657G>A    | Verified   | GAC | CTG | CTC | 3 | G | A |
| TCGA-24-0979 | BEX2       | ENST00000372677 | p.A8A    | c.24G>A     | Verified   | cga | gcg | tta | 3 | G | A |
| TCGA-13-0885 | BHLHB9     | ENST00000457056 | p.A60T   | c.178G>A    | Verified   | AAG | GCA | GTG | 1 | G | A |
| TCGA-09-2044 | BIN1       | ENST00000316724 | p.D93N   | c.277G>A    | Verified   | ccc | gat | tgg | 1 | G | A |
| TCGA-13-0887 | BIN2       | ENST00000267012 | p.E92K   | c.274G>A    | Verified   | AGC | GAG | TGG | 1 | G | A |
| TCGA-23-1120 | BMPR2      | ENST00000374580 | p.L758L  | c.2274G>A   | Verified   | agt | ttg | cct | 3 | G | A |
| TCGA-09-1665 | BNC1       | ENST00000345382 | p.G391R  | c.1171G>A   | Verified   | GAA | GGG | TGT | 1 | G | A |
| TCGA-04-1356 | BOC        | ENST00000355385 | p.G50R   | c.148G>A    | Verified   | CCC | GGA | GGC | 1 | G | A |
| TCGA-61-2094 | BPIL1      | ENST00000170150 | p.G395D  | c.1184G>A   | Unverified | GTG | GGC | TTC | 2 | G | A |
| TCGA-29-1783 | BRIP1      | ENST00000259008 | p.A395T  | c.1183G>A   | Unverified | GAA | GCT | CAT | 1 | G | A |
| TCGA-29-1783 | BRIP1_ENST | ENST00000259008 | p.A395T  | c.1183G>A   | Unverified | GAA | GCT | CAT | 1 | G | A |
| TCGA-61-1738 | BRPF3      | ENST00000357641 | p.R257H  | c.770G>A    | Unverified | TGC | CGC | TGC | 2 | G | A |
| TCGA-61-1738 | BRPF3      | ENST00000357641 | p.R257H  | c.770G>A    | Unverified | TGC | CGC | TGC | 2 | G | A |
| TCGA-04-1342 | BRSK1      | ENST00000309383 | p.G327D  | c.980G>A    | Verified   | CTG | GGC | TGC | 2 | G | A |
| TCGA-24-1844 | BRWD3      | ENST00000373275 | p.R1287K | c.3860G>A   | Unverified | GGA | AGA | AAG | 2 | G | A |
| TCGA-24-2024 | BSN        | ENST00000296452 | p.R3591H | c.10772G>A  | Verified   | GCC | CGC | TCT | 2 | G | A |
| TCGA-13-1509 | BSN        | ENST00000296452 | p.T2676T | c.8028G>A   | Verified   | CAG | ACG | GAG | 3 | G | A |
| TCGA-04-1347 | BSND       | ENST00000371265 | p.Q95Q   | c.285G>A    | Verified   | CCC | CAG | CCG | 3 | G | A |
| TCGA-29-1761 | BTBD11     | ENST00000280758 | p.A784T  | c.2350G>A   | Unverified | TGC | GCC | AGC | 1 | G | A |
| TCGA-29-1763 | BTBD7      | ENST00000334746 | p.E890E  | c.2670G>A   | Unverified | CCA | GAG | CTT | 3 | G | A |
| TCGA-24-1843 | BTNL2      | ENST00000374993 | p.V224I  | c.670G>A    | Unverified | CCC | GTC | CTC | 1 | G | A |
| TCGA-29-1766 | BUB1       | ENST00000302759 | p.?      | c.1616+1G>A | Unverified | tat | gga | tta | 2 | G | A |
| TCGA-61-1906 | BZW1       | ENST00000353957 | p.A67T   | c.199G>A    | Unverified | TAT | GCA | GAA | 1 | G | A |
| TCGA-61-1906 | BZW1       | ENST00000353957 | p.A67T   | c.199G>A    | Unverified | TAT | GCA | GAA | 1 | G | A |
| TCGA-61-1906 | BZW1_ENST  | ENST00000452790 | p.A99T   | c.295G>A    | Unverified | TAT | GCA | GAA | 1 | G | A |
| TCGA-61-1906 | BZW1_ENST  | ENST00000452790 | p.A99T   | c.295G>A    | Unverified | TAT | GCA | GAA | 1 | G | A |
| TCGA-04-1638 | C10orf58   | ENST00000372188 | p.R155H  | c.464G>A    | Unverified | ATC | CGT | CTG | 2 | G | A |

|              |             |                     |          |           |            |     |     |     |   |   |   |
|--------------|-------------|---------------------|----------|-----------|------------|-----|-----|-----|---|---|---|
| TCGA-29-1777 | C10orf71_E1 | ENST00000323868     | p.E28K   | c.82G>A   | Unverified | AGG | GAG | GTG | 1 | G | A |
| TCGA-29-1777 | C10orf71_E1 | ENST00000374144     | p.E28K   | c.82G>A   | Unverified | AGG | GAG | GTG | 1 | G | A |
| TCGA-24-1422 | C10orf71_E1 | ENST00000374144     | p.Q123Q  | c.369G>A  | Verified   | GTC | CAG | AGG | 3 | G | A |
| TCGA-61-2012 | C11orf41    | ENST00000265654     | p.R1106Q | c.3317G>A | Unverified | CGG | CGG | TTT | 2 | G | A |
| TCGA-24-1422 | C11orf57    | ENST00000280352     | p.R274H  | c.821G>A  | Verified   | AAA | CGC | ACA | 2 | G | A |
| TCGA-61-2109 | C12orf29    | ENST00000356891     | p.A166T  | c.496G>A  | Unverified | ATT | GCC | CTG | 1 | G | A |
| TCGA-24-1850 | C12orf32    | ENST00000303648     | p.Q143Q  | c.429G>A  | Unverified | GTG | CAG | GCA | 3 | G | A |
| TCGA-20-0991 | C12orf34    | ENST00000358906     | p.E29K   | c.85G>A   | Verified   | TGC | GAG | GCG | 1 | G | A |
| TCGA-09-2051 | C12orf51_E1 | ENST00000377560_v62 | p.W278*  | c.834G>A  | Unverified | ATC | TGG | TCT | 3 | G | A |
| TCGA-24-1474 | C12orf76    | ENST00000309050     | p.A126A  | c.378G>A  | Unverified | TCG | GCG | TCG | 3 | G | A |
| TCGA-61-2095 | C15orf2     | ENST00000329468     | p.A80T   | c.238G>A  | Unverified | GCC | GCC | CCT | 1 | G | A |
| TCGA-13-0905 | C15orf38    | ENST00000357484     | p.S17N   | c.50G>A   | Unverified | CAG | AGC | GTC | 2 | G | A |
| TCGA-25-2391 | C15orf40_E1 | ENST00000451195     | p.R3R    | c.9G>A    | Unverified | CTG | CGG | CTC | 3 | G | A |
| TCGA-04-1331 | C15orf42    | ENST00000268138     | p.V803I  | c.2407G>A | Verified   | GGT | GTC | CTT | 1 | G | A |
| TCGA-13-1510 | C15orf42    | ENST00000268138     | p.E1184K | c.3550G>A | Unverified | GGA | GAA | GGT | 1 | G | A |
| TCGA-13-0920 | C16orf58    | ENST00000327237     | p.G262E  | c.785G>A  | Verified   | CTT | GGA | TGT | 2 | G | A |
| TCGA-24-2024 | C17orf101   | ENST00000329197     | p.G83G   | c.249G>A  | Verified   | GCA | GGG | AGA | 3 | G | A |
| TCGA-24-1431 | C17orf39    | ENST00000268719     | p.M233I  | c.699G>A  | Unverified | TTC | ATG | AGG | 3 | G | A |
| TCGA-24-1845 | C17orf58    | ENST00000334461     | p.R14Q   | c.41G>A   | Unverified | TTC | CGA | GTC | 2 | G | A |
| TCGA-24-1845 | C17orf58_E1 | ENST00000449250     | p.R14Q   | c.41G>A   | Unverified | TTC | CGA | GTC | 2 | G | A |
| TCGA-30-1714 | C17orf97    | ENST00000360127     | p.E350K  | c.1048G>A | Unverified | CCC | GAG | GCC | 1 | G | A |
| TCGA-30-1714 | C17orf97_E1 | ENST00000360127     | p.E350K  | c.1048G>A | Unverified | CCC | GAG | GCC | 1 | G | A |
| TCGA-29-1703 | C19orf28    | ENST00000398558     | p.G536R  | c.1606G>A | Unverified | TGG | GGG | ACC | 1 | G | A |
| TCGA-24-1469 | C19orf45    | ENST00000361270     | p.L378L  | c.1134G>A | Unverified | CAC | TTG | CAG | 3 | G | A |
| TCGA-24-1469 | C19orf45    | ENST00000361270     | p.Q371Q  | c.1113G>A | Unverified | GTG | CAG | AAA | 3 | G | A |
| TCGA-24-1464 | C19orf48    | ENST00000391812     | p.G24G   | c.72G>A   | Verified   | CCA | GGG | CCC | 3 | G | A |
| TCGA-30-1857 | C1orf112    | ENST00000286031     | p.E603K  | c.1807G>A | Unverified | ATC | GAA | GTT | 1 | G | A |
| TCGA-09-1674 | C1orf114    | ENST00000367805     | p.S404N  | c.1211G>A | Unverified | AAC | AGT | AGA | 2 | G | A |
| TCGA-29-1690 | C1orf172    | ENST00000320567     | p.R310H  | c.929G>A  | Unverified | AGC | CGT | GCT | 2 | G | A |
| TCGA-20-1687 | C1orf192    | ENST00000367974     | p.M70I   | c.210G>A  | Unverified | CAA | ATG | CCT | 3 | G | A |
| TCGA-04-1342 | C1orf85     | ENST00000362007     | p.V81I   | c.241G>A  | Verified   | GTG | GTA | ATG | 1 | G | A |
| TCGA-23-2078 | C1orf9      | ENST00000263688     | p.E52K   | c.154G>A  | Verified   | AAT | GAA | GAT | 1 | G | A |
| TCGA-23-1022 | C1QTNF1     | ENST00000311661     | p.S61N   | c.182G>A  | Verified   | AAG | AGC | CAC | 2 | G | A |
| TCGA-13-0885 | C20orf185   | ENST00000375494     | p.A362T  | c.1084G>A | Verified   | CCA | GCC | AAC | 1 | G | A |

|              |             |                 |         |             |            |     |     |     |   |   |   |
|--------------|-------------|-----------------|---------|-------------|------------|-----|-----|-----|---|---|---|
| TCGA-13-0885 | C20orf185   | ENST00000375494 | p.M125I | c.375G>A    | Verified   | GGC | ATG | CAT | 3 | G | A |
| TCGA-04-1361 | C20orf70    | ENST00000253362 | p.V60I  | c.178G>A    | Verified   | AAG | GTC | GAC | 1 | G | A |
| TCGA-04-1361 | C20orf70    | ENST00000253362 | p.V60I  | c.178G>A    | Verified   | AAG | GTC | GAC | 1 | G | A |
| TCGA-61-1914 | C21orf2     | ENST00000339818 | p.R133H | c.398G>A    | Unverified | TCC | CGT | GCA | 2 | G | A |
| TCGA-13-0762 | C22orf32    | ENST00000331479 | p.R52H  | c.155G>A    | Verified   | ACC | CGC | AGC | 2 | G | A |
| TCGA-13-0762 | C22orf32    | ENST00000331479 | p.R52H  | c.155G>A    | Verified   | ACC | CGC | AGC | 2 | G | A |
| TCGA-61-1998 | C2CD2       | ENST00000380486 | p.E381E | c.1143G>A   | Unverified | GCA | GAG | TTC | 3 | G | A |
| TCGA-61-1899 | C2CD2       | ENST00000380486 | p.P559P | c.1677G>A   | Unverified | GCC | CCG | CCA | 3 | G | A |
| TCGA-25-1313 | C2orf67     | ENST00000281772 | p.R762Q | c.2285G>A   | Verified   | CGA | CGG | AGA | 2 | G | A |
| TCGA-13-0791 | C2orf85     | ENST00000343216 | p.G503S | c.1507G>A   | Verified   | CAA | GGC | TAT | 1 | G | A |
| TCGA-61-2094 | C3orf20     | ENST00000253697 | p.E652K | c.1954G>A   | Unverified | CGC | GAG | GGG | 1 | G | A |
| TCGA-24-1422 | C3orf25     | ENST00000505956 | p.D288N | c.862G>A    | Verified   | AGA | GAT | TCC | 1 | G | A |
| TCGA-25-1326 | C3orf64     | ENST00000295571 | p.C79Y  | c.236G>A    | Verified   | TAC | TGC | TGG | 2 | G | A |
| TCGA-61-1738 | C4orf21     | ENST00000309071 | p.W559* | c.1677G>A   | Unverified | AGT | TGG | GTA | 3 | G | A |
| TCGA-61-1738 | C4orf21     | ENST00000309071 | p.W559* | c.1677G>A   | Unverified | AGT | TGG | GTA | 3 | G | A |
| TCGA-61-1738 | C4orf21_EN: | ENST00000505019 | p.W559* | c.1677G>A   | Unverified | AGT | TGG | GTA | 3 | G | A |
| TCGA-61-1738 | C4orf21_EN: | ENST00000505019 | p.W559* | c.1677G>A   | Unverified | AGT | TGG | GTA | 3 | G | A |
| TCGA-24-1846 | C5          | ENST00000223642 | p.?     | c.3486+1G>A | Unverified | CTG | GTG | AAA | 3 | G | A |
| TCGA-13-0900 | C6          | ENST00000263413 | p.T702T | c.2106G>A   | Verified   | CGG | ACG | GAG | 3 | G | A |
| TCGA-29-1691 | C6orf138    | ENST00000339488 | p.E67K  | c.199G>A    | Unverified | CCC | GAG | GGC | 1 | G | A |
| TCGA-24-1847 | C6orf138    | ENST00000339488 | p.Q206Q | c.618G>A    | Unverified | CTC | CAG | GAG | 3 | G | A |
| TCGA-20-0991 | C6orf174    | ENST00000368268 | p.E657E | c.1971G>A   | Verified   | ACG | GAG | CTG | 3 | G | A |
| TCGA-30-1714 | C6orf222    | ENST00000437635 | p.E137K | c.409G>A    | Unverified | CTG | GAA | GCA | 1 | G | A |
| TCGA-36-1577 | C6orf27     | ENST00000375688 | p.R835Q | c.2504G>A   | Verified   | GAC | CGG | CAC | 2 | G | A |
| TCGA-29-1781 | C7orf45     | ENST00000297819 | p.R131H | c.392G>A    | Unverified | AGG | CGC | CAG | 2 | G | A |
| TCGA-13-0916 | C8A         | ENST00000361249 | p.R59Q  | c.176G>A    | Verified   | TAC | CGA | CAC | 2 | G | A |
| TCGA-13-0761 | C8orf80     | ENST00000341513 | p.G679S | c.2035G>A   | Unverified | ACG | GGC | AAA | 1 | G | A |
| TCGA-13-0761 | C8orf80     | ENST00000341513 | p.G679S | c.2035G>A   | Unverified | ACG | GGC | AAA | 1 | G | A |
| TCGA-61-1740 | C8orf80     | ENST00000341513 | p.G793R | c.2377G>A   | Unverified | CCC | GGG | ACA | 1 | G | A |
| TCGA-61-1740 | C8orf80_EN: | ENST00000413272 | p.G793R | c.2377G>A   | Unverified | CCC | GGG | ACA | 1 | G | A |
| TCGA-04-1342 | C9orf114    | ENST00000361256 | p.E111K | c.331G>A    | Unverified | GAT | GAG | ATC | 1 | G | A |
| TCGA-29-1769 | C9orf119    | ENST00000320188 | p.V206M | c.616G>A    | Unverified | GAT | GTG | GGG | 1 | G | A |
| TCGA-13-1507 | C9orf135    | ENST00000377197 | p.K40K  | c.120G>A    | Verified   | CAC | AAG | AAA | 3 | G | A |
| TCGA-13-0793 | C9orf171    | ENST00000343036 | p.R161H | c.482G>A    | Verified   | AAC | CGC | GGG | 2 | G | A |

|              |            |                 |          |           |            |     |     |     |   |   |   |
|--------------|------------|-----------------|----------|-----------|------------|-----|-----|-----|---|---|---|
| TCGA-23-1022 | C9orf48    | ENST00000403891 | p.C756Y  | c.2267G>A | Verified   | AGC | TGC | TCT | 2 | G | A |
| TCGA-29-1702 | C9orf66    | ENST00000382387 | p.G241E  | c.722G>A  | Unverified | CCC | GGG | GCC | 2 | G | A |
| TCGA-30-1718 | C9orf79    | ENST00000325643 | p.A235T  | c.703G>A  | Unverified | CCT | GCA | ACC | 1 | G | A |
| TCGA-61-2102 | CA10       | ENST00000285273 | p.M98I   | c.294G>A  | Verified   | ACC | ATG | TAC | 3 | G | A |
| TCGA-04-1362 | CA9        | ENST00000378357 | p.A276T  | c.826G>A  | Verified   | TTG | GCC | GCC | 1 | G | A |
| TCGA-13-0755 | CA9        | ENST00000378357 | p.L65L   | c.195G>A  | Verified   | GAT | CTG | CCC | 3 | G | A |
| TCGA-24-1563 | CABIN1     | ENST00000398319 | p.G1281G | c.3843G>A | Verified   | TCT | GGG | GTT | 3 | G | A |
| TCGA-04-1530 | CABLES1    | ENST00000256925 | p.A541T  | c.1621G>A | Unverified | ATG | GCC | TTC | 1 | G | A |
| TCGA-29-1775 | CABP1_ENS  | ENST00000288616 | p.Q49Q   | c.147G>A  | Unverified | GCC | CAG | AAC | 3 | G | A |
| TCGA-24-1474 | CACHD1     | ENST00000290039 | p.M1090I | c.3270G>A | Verified   | CGT | ATG | TCC | 3 | G | A |
| TCGA-23-1123 | CACNA1A_E  | ENST00000357018 | p.V1953M | c.5857G>A | Verified   | ACC | GTG | GGG | 1 | G | A |
| TCGA-23-1123 | CACNA1A_E  | ENST00000357018 | p.V1953M | c.5857G>A | Verified   | ACC | GTG | GGG | 1 | G | A |
| TCGA-30-1718 | CACNA1B    | ENST00000371372 | p.Q1581Q | c.4743G>A | Unverified | CGC | CAG | GGC | 3 | G | A |
| TCGA-10-0930 | CACNA1D    | ENST00000288139 | p.A714T  | c.2140G>A | Verified   | CAA | GCA | CTT | 1 | G | A |
| TCGA-10-0930 | CACNA1D    | ENST00000288139 | p.A714T  | c.2140G>A | Verified   | CAA | GCA | CTT | 1 | G | A |
| TCGA-09-2051 | CACNA1E    | ENST00000367570 | p.V1019M | c.3055G>A | Unverified | CAC | GTG | GTG | 1 | G | A |
| TCGA-24-1847 | CACNA1F    | ENST00000376265 | p.A890T  | c.2668G>A | Unverified | gcc | gct | gag | 1 | G | A |
| TCGA-25-2398 | CACNA1F    | ENST00000376265 | p.G1701R | c.5101G>A | Unverified | agg | ggg | act | 1 | G | A |
| TCGA-30-1856 | CACNA1I    | ENST00000404898 | p.E288K  | c.862G>A  | Unverified | AAG | GAG | CAG | 1 | G | A |
| TCGA-30-1856 | CACNA1I_EM | ENST00000402142 | p.E288K  | c.862G>A  | Unverified | AAG | GAG | CAG | 1 | G | A |
| TCGA-04-1356 | CACNA1S    | ENST00000362061 | p.E747K  | c.2239G>A | Verified   | GAG | GAA | GAT | 1 | G | A |
| TCGA-23-2078 | CACNA1S    | ENST00000362061 | p.A157T  | c.469G>A  | Unverified | GGA | GCC | GGC | 1 | G | A |
| TCGA-13-0916 | CACNA2D1   | ENST00000356860 | p.G772E  | c.2315G>A | Verified   | AGT | GGA | CCT | 2 | G | A |
| TCGA-29-1703 | CACNA2D3   | ENST00000474759 | p.A402T  | c.1204G>A | Unverified | GCT | GCG | TTT | 1 | G | A |
| TCGA-61-1740 | CACNG2     | ENST00000300105 | p.A159T  | c.475G>A  | Unverified | TCT | GCC | AAT | 1 | G | A |
| TCGA-13-1501 | CACNG6     | ENST00000252729 | p.W248*  | c.744G>A  | Verified   | CCC | TGG | GGG | 3 | G | A |
| TCGA-13-1501 | CACNG6     | ENST00000252729 | p.W248*  | c.744G>A  | Verified   | CCC | TGG | GGG | 3 | G | A |
| TCGA-24-1850 | CADM4      | ENST00000222374 | p.P279P  | c.837G>A  | Unverified | CTG | CCG | GGT | 3 | G | A |
| TCGA-04-1649 | CALCRL     | ENST00000392370 | p.R417H  | c.1250G>A | Unverified | CTT | CGT | AGT | 2 | G | A |
| TCGA-13-0760 | CAMK2B     | ENST00000395749 | p.R275H  | c.824G>A  | Verified   | caa | cgc | tcc | 2 | G | A |
| TCGA-29-1699 | CAMK2D     | ENST00000342666 | p.M443I  | c.1329G>A | Unverified | gga | atg | cca | 3 | G | A |
| TCGA-23-1123 | CAMKV      | ENST00000477224 | p.R92H   | c.275G>A  | Verified   | ACC | CGC | AAG | 2 | G | A |
| TCGA-23-1123 | CAMKV      | ENST00000477224 | p.R92H   | c.275G>A  | Verified   | ACC | CGC | AAG | 2 | G | A |
| TCGA-23-1123 | CAMKV_ENS  | ENST00000477224 | p.R92H   | c.275G>A  | Verified   | ACC | CGC | AAG | 2 | G | A |



|              |            |                 |          |           |            |     |     |     |   |   |   |
|--------------|------------|-----------------|----------|-----------|------------|-----|-----|-----|---|---|---|
| TCGA-23-1123 | CAMKV_EN   | ENST00000477224 | p.R92H   | c.275G>A  | Verified   | ACC | CGC | AAG | 2 | G | A |
| TCGA-24-1604 | CAMKV_EN   | ENST00000477224 | p.E19E   | c.57G>A   | Verified   | TCG | GAG | GTG | 3 | G | A |
| TCGA-23-1123 | CAMTA1     | ENST00000303635 | p.V274M  | c.820G>A  | Verified   | AGC | GTG | CAT | 1 | G | A |
| TCGA-23-1123 | CAMTA1     | ENST00000303635 | p.V274M  | c.820G>A  | Verified   | AGC | GTG | CAT | 1 | G | A |
| TCGA-29-1699 | CAP2       | ENST00000229922 | p.M53I   | c.159G>A  | Unverified | CTG | ATG | GAC | 3 | G | A |
| TCGA-13-0916 | CAPN1      | ENST00000279247 | p.L112L  | c.336G>A  | Verified   | GCA | CTG | GGG | 3 | G | A |
| TCGA-61-1914 | CAPN6      | ENST00000324068 | p.D365N  | c.1093G>A | Unverified | gat | gat | ccc | 1 | G | A |
| TCGA-04-1331 | CAPRIN2    | ENST00000251071 | p.G80G   | c.240G>A  | Verified   | GAG | GGG | AAT | 3 | G | A |
| TCGA-24-1843 | CAPS2      | ENST00000328705 | p.R162Q  | c.485G>A  | Unverified | CTC | CGA | ATC | 2 | G | A |
| TCGA-24-1843 | CAPS2_ENS  | ENST00000409445 | p.R394Q  | c.1181G>A | Unverified | CTC | CGA | ATC | 2 | G | A |
| TCGA-24-2280 | CARD11     | ENST00000396946 | p.G924G  | c.2772G>A | Unverified | TCG | GGG | AGT | 3 | G | A |
| TCGA-29-1777 | CARM1      | ENST00000327064 | p.G386S  | c.1156G>A | Unverified | CAC | GGC | CTG | 1 | G | A |
| TCGA-61-1914 | CARM1      | ENST00000327064 | p.D341N  | c.1021G>A | Unverified | GTG | GAC | ACA | 1 | G | A |
| TCGA-13-0793 | CASP8AP2   | ENST00000237177 | p.L198L  | c.594G>A  | Verified   | AAT | CTG | GAA | 3 | G | A |
| TCGA-13-1497 | CASR       | ENST00000296154 | p.R66H   | c.197G>A  | Verified   | TTC | CGT | GGG | 2 | G | A |
| TCGA-25-1313 | CASR       | ENST00000296154 | p.R678H  | c.2033G>A | Verified   | TGC | CGC | CTG | 2 | G | A |
| TCGA-61-2102 | CAST       | ENST00000309190 | p.R288H  | c.863G>A  | Verified   | CTC | CGC | TCA | 2 | G | A |
| TCGA-13-0795 | CAT        | ENST00000241052 | p.Q53Q   | c.159G>A  | Verified   | ggt | cag | gat | 3 | G | A |
| TCGA-13-1489 | CBY1       | ENST00000216029 | p.L24L   | c.72G>A   | Verified   | AAC | CTG | CAT | 3 | G | A |
| TCGA-29-1776 | CC2D2A     | ENST00000389652 | p.P603P  | c.1809G>A | Unverified | GTC | CCG | GAG | 3 | G | A |
| TCGA-29-1776 | CC2D2A_EN  | ENST00000424120 | p.P652P  | c.1956G>A | Unverified | GTC | CCG | GAG | 3 | G | A |
| TCGA-24-1850 | CCDC104    | ENST00000349456 | p.E76K   | c.226G>A  | Unverified | AAT | GAA | GAT | 1 | G | A |
| TCGA-13-1497 | CCDC105    | ENST00000292574 | p.R462H  | c.1385G>A | Verified   | GTG | CGC | CTG | 2 | G | A |
| TCGA-61-2102 | CCDC126    | ENST00000307471 | p.S136S  | c.408G>A  | Verified   | GTC | TCG | GGC | 3 | G | A |
| TCGA-23-1114 | CCDC129    | ENST00000407970 | p.Q63Q   | c.189G>A  | Unverified | ATT | CAG | CAG | 3 | G | A |
| TCGA-09-2051 | CCDC136    | ENST00000397697 | p.E483E  | c.1449G>A | Unverified | CAG | GAG | ATG | 3 | G | A |
| TCGA-24-2290 | CCDC157_EI | ENST00000405659 | p.G33R   | c.97G>A   | Verified   | GCC | GGG | CCT | 1 | G | A |
| TCGA-24-2290 | CCDC157_EI | ENST00000405659 | p.G33R   | c.97G>A   | Verified   | GCC | GGG | CCT | 1 | G | A |
| TCGA-25-1318 | CCDC158    | ENST00000388914 | p.E668K  | c.2002G>A | Verified   | AGT | GAA | TTA | 1 | G | A |
| TCGA-25-1318 | CCDC158    | ENST00000388914 | p.E668K  | c.2002G>A | Verified   | AGT | GAA | TTA | 1 | G | A |
| TCGA-24-1470 | CCDC165    | ENST00000359865 | p.K1010K | c.3030G>A | Verified   | TCC | AAG | CTG | 3 | G | A |
| TCGA-61-2102 | CCDC165    | ENST00000359865 | p.S1018S | c.3054G>A | Verified   | TGC | TCG | GCC | 3 | G | A |
| TCGA-04-1655 | CCDC33     | ENST00000398814 | p.R186Q  | c.557G>A  | Unverified | CTC | CGG | GGA | 2 | G | A |
| TCGA-23-1117 | CCDC33     | ENST00000398814 | p.L497L  | c.1491G>A | Verified   | GAG | CTG | GAT | 3 | G | A |

|              |            |                 |          |           |            |     |     |     |   |   |   |
|--------------|------------|-----------------|----------|-----------|------------|-----|-----|-----|---|---|---|
| TCGA-23-1117 | CCDC33     | ENST00000398814 | p.L497L  | c.1491G>A | Verified   | GAG | CTG | GAT | 3 | G | A |
| TCGA-04-1655 | CCDC33_EN' | ENST00000321288 | p.R389Q  | c.1166G>A | Unverified | CTC | CGG | GGA | 2 | G | A |
| TCGA-24-1104 | CCDC60     | ENST00000327554 | p.R131H  | c.392G>A  | Verified   | CGT | CGC | CCA | 2 | G | A |
| TCGA-13-0760 | CCDC62     | ENST00000341952 | p.D576N  | c.1726G>A | Verified   | CAA | GAT | TCC | 1 | G | A |
| TCGA-20-0991 | CCDC62     | ENST00000341952 | p.E228K  | c.682G>A  | Verified   | AAT | GAA | AAG | 1 | G | A |
| TCGA-13-0762 | CCDC64     | ENST00000397558 | p.L170L  | c.510G>A  | Verified   | GAG | CTG | GAG | 3 | G | A |
| TCGA-13-0762 | CCDC64     | ENST00000397558 | p.L170L  | c.510G>A  | Verified   | GAG | CTG | GAG | 3 | G | A |
| TCGA-13-0900 | CCDC67     | ENST00000298050 | p.K149K  | c.447G>A  | Unverified | GCA | AAG | TCA | 3 | G | A |
| TCGA-24-1847 | CCDC70     | ENST00000242819 | p.G85D   | c.254G>A  | Unverified | CTG | GGT | TTT | 2 | G | A |
| TCGA-25-2393 | CCDC82     | ENST00000278520 | p.V17M   | c.49G>A   | Verified   | CAC | GTG | CCT | 1 | G | A |
| TCGA-23-1029 | CCDC86     | ENST00000227520 | p.Q349Q  | c.1047G>A | Unverified | CTG | CAG | AAG | 3 | G | A |
| TCGA-61-2109 | CCDC88C    | ENST00000389857 | p.R1569Q | c.4706G>A | Unverified | TCG | CGG | CCA | 2 | G | A |
| TCGA-24-1616 | CCNA1      | ENST00000255465 | p.C452Y  | c.1355G>A | Verified   | ctg | tgt | gtg | 2 | G | A |
| TCGA-13-1501 | CCNB3      | ENST00000376042 | p.R108Q  | c.323G>A  | Verified   | AAG | CGG | AAT | 2 | G | A |
| TCGA-13-1501 | CCNB3      | ENST00000376042 | p.R108Q  | c.323G>A  | Verified   | AAG | CGG | AAT | 2 | G | A |
| TCGA-04-1652 | CCNB3      | ENST00000376042 | p.L649L  | c.1947G>A | Unverified | ACC | TTG | CAG | 3 | G | A |
| TCGA-04-1652 | CCNB3      | ENST00000376042 | p.L649L  | c.1947G>A | Unverified | ACC | TTG | CAG | 3 | G | A |
| TCGA-13-1501 | CCNB3_ENS' | ENST00000376042 | p.R108Q  | c.323G>A  | Verified   | AAG | CGG | AAT | 2 | G | A |
| TCGA-13-1501 | CCNB3_ENS' | ENST00000376042 | p.R108Q  | c.323G>A  | Verified   | AAG | CGG | AAT | 2 | G | A |
| TCGA-04-1652 | CCNB3_ENS' | ENST00000376042 | p.L649L  | c.1947G>A | Unverified | ACC | TTG | CAG | 3 | G | A |
| TCGA-04-1652 | CCNB3_ENS' | ENST00000376042 | p.L649L  | c.1947G>A | Unverified | ACC | TTG | CAG | 3 | G | A |
| TCGA-25-1326 | CCNDBP1    | ENST00000300213 | p.E50E   | c.150G>A  | Verified   | CGA | GAG | ATG | 3 | G | A |
| TCGA-61-1906 | CCNDBP1    | ENST00000300213 | p.T68T   | c.204G>A  | Unverified | GCC | ACG | ACT | 3 | G | A |
| TCGA-61-1906 | CCNDBP1    | ENST00000300213 | p.T68T   | c.204G>A  | Unverified | GCC | ACG | ACT | 3 | G | A |
| TCGA-61-1906 | CCNL1      | ENST00000295926 | p.K486K  | c.1458G>A | Unverified | gcc | aag | aaa | 3 | G | A |
| TCGA-61-1906 | CCNL1      | ENST00000295926 | p.K486K  | c.1458G>A | Unverified | gcc | aag | aaa | 3 | G | A |
| TCGA-24-2262 | CCNL2      | ENST00000400809 | p.V45V   | c.135G>A  | Verified   | GGG | GTG | CTC | 3 | G | A |
| TCGA-13-1501 | CCNT2      | ENST00000264157 | p.S613N  | c.1838G>A | Verified   | TCT | AGC | TCC | 2 | G | A |
| TCGA-13-1501 | CCNT2      | ENST00000264157 | p.S613N  | c.1838G>A | Verified   | TCT | AGC | TCC | 2 | G | A |
| TCGA-61-1899 | CCR3       | ENST00000357422 | p.A290T  | c.868G>A  | Unverified | atc | gcc | tac | 1 | G | A |
| TCGA-13-0795 | CCR6       | ENST00000400926 | p.D10N   | c.28G>A   | Verified   | agc | gat | gtt | 1 | G | A |
| TCGA-29-1762 | CCR8       | ENST00000326306 | p.R328K  | c.983G>A  | Unverified | gga | aga | caa | 2 | G | A |
| TCGA-04-1347 | CCT4       | ENST00000394440 | p.V397V  | c.1191G>A | Verified   | CTG | GTG | ATT | 3 | G | A |
| TCGA-29-1763 | CCT5       | ENST00000280326 | p.G216S  | c.646G>A  | Unverified | GTG | GGC | GGC | 1 | G | A |

|              |           |                 |          |           |            |     |     |     |   |   |   |
|--------------|-----------|-----------------|----------|-----------|------------|-----|-----|-----|---|---|---|
| TCGA-13-0793 | CD163     | ENST00000359156 | p.G1014D | c.3041G>A | Verified   | TGG | GGC | CAT | 2 | G | A |
| TCGA-13-0916 | CD163     | ENST00000359156 | p.G873E  | c.2618G>A | Verified   | AAA | GGG | AAA | 2 | G | A |
| TCGA-24-2288 | CD209     | ENST00000315599 | p.A382T  | c.1144G>A | Unverified | GCA | GCC | TCC | 1 | G | A |
| TCGA-24-2288 | CD209_ENS | ENST00000315599 | p.A382T  | c.1144G>A | Unverified | GCA | GCC | TCC | 1 | G | A |
| TCGA-13-0923 | CD244     | ENST00000368034 | p.V269I  | c.805G>A  | Verified   | GAT | GTC | AAG | 1 | G | A |
| TCGA-13-1505 | CD82      | ENST00000227155 | p.V62M   | c.184G>A  | Verified   | GGC | GTG | GGG | 1 | G | A |
| TCGA-24-1431 | CD83      | ENST00000379153 | p.Q71Q   | c.213G>A  | Unverified | GGA | CAG | CAC | 3 | G | A |
| TCGA-23-1110 | CD8A      | ENST00000283635 | p.D104N  | c.310G>A  | Verified   | AGC | GAC | TTC | 1 | G | A |
| TCGA-04-1651 | CD97      | ENST00000242786 | p.R187H  | c.560G>A  | Unverified | TGC | CGC | TGC | 2 | G | A |
| TCGA-04-1651 | CD97      | ENST00000242786 | p.R187H  | c.560G>A  | Unverified | TGC | CGC | TGC | 2 | G | A |
| TCGA-29-1702 | CDC20     | ENST00000310955 | p.R471H  | c.1412G>A | Unverified | TGG | CGC | TGT | 2 | G | A |
| TCGA-29-1777 | CDC23     | ENST00000394886 | p.A517T  | c.1549G>A | Unverified | CTG | GCC | CAG | 1 | G | A |
| TCGA-04-1655 | CDH10     | ENST00000264463 | p.A727T  | c.2179G>A | Unverified | ACC | GCA | CCC | 1 | G | A |
| TCGA-13-1499 | CDH10     | ENST00000264463 | p.T258T  | c.774G>A  | Verified   | ATC | ACG | CTG | 3 | G | A |
| TCGA-09-0369 | CDH10     | ENST00000264463 | p.T694T  | c.2082G>A | Verified   | GAA | ACG | TTA | 3 | G | A |
| TCGA-09-0369 | CDH10     | ENST00000264463 | p.T694T  | c.2082G>A | Verified   | GAA | ACG | TTA | 3 | G | A |
| TCGA-04-1338 | CDH18     | ENST00000382275 | p.A195T  | c.583G>A  | Verified   | AGC | GCT | CGG | 1 | G | A |
| TCGA-13-1498 | CDH18     | ENST00000382275 | p.V33V   | c.99G>A   | Verified   | AAG | GTG | ATG | 3 | G | A |
| TCGA-13-0760 | CDH26     | ENST00000348616 | p.G583E  | c.1748G>A | Verified   | CAG | GGA | CTT | 2 | G | A |
| TCGA-09-2050 | CDH5      | ENST00000341529 | p.A31T   | c.91G>A   | Verified   | CCT | GCC | CAA | 1 | G | A |
| TCGA-04-1652 | CDH9      | ENST00000231021 | p.E681E  | c.2043G>A | Unverified | CCA | GAG | GCA | 3 | G | A |
| TCGA-04-1652 | CDH9      | ENST00000231021 | p.E681E  | c.2043G>A | Unverified | CCA | GAG | GCA | 3 | G | A |
| TCGA-13-0916 | CDHR2     | ENST00000261944 | p.D387N  | c.1159G>A | Verified   | ATC | GAT | GAC | 1 | G | A |
| TCGA-13-0906 | CDK1_ENST | ENST00000395284 | p.?      | c.37+1G>A | Verified   | GAA | GGT | ACC | 1 | G | A |
| TCGA-04-1343 | CDK15     | ENST00000410091 | p.V210M  | c.628G>A  | Verified   | gtc | gtg | acc | 1 | G | A |
| TCGA-24-1423 | CDK17     | ENST00000261211 | p.M85I   | c.255G>A  | Verified   | TTC | ATG | GCA | 3 | G | A |
| TCGA-24-2290 | CDKN2C    | ENST00000262662 | p.D64N   | c.190G>A  | Verified   | ccc | gat | ttg | 1 | G | A |
| TCGA-24-2290 | CDKN2C    | ENST00000262662 | p.D64N   | c.190G>A  | Verified   | ccc | gat | ttg | 1 | G | A |
| TCGA-29-1705 | CDRT15L2  | ENST00000399044 | p.G58D   | c.173G>A  | Unverified | GCT | GGC | CAG | 2 | G | A |
| TCGA-13-0791 | CEACAM6   | ENST00000199764 | p.P186P  | c.558G>A  | Verified   | CTC | CCG | GTC | 3 | G | A |
| TCGA-24-1604 | CELA3B    | ENST00000337107 | p.V252V  | c.756G>A  | Verified   | ACG | GTG | TTC | 3 | G | A |
| TCGA-23-1029 | CELF1     | ENST00000358597 | p.G353E  | c.1058G>A | Unverified | ACC | GGG | AGC | 2 | G | A |
| TCGA-04-1338 | CELF3     | ENST00000290583 | p.A150A  | c.450G>A  | Verified   | CAG | GCG | GCC | 3 | G | A |
| TCGA-24-1845 | CELSR2    | ENST00000271332 | p.A1595T | c.4783G>A | Unverified | GAC | GCG | TTC | 1 | G | A |

|              |            |                 |          |           |            |     |     |     |   |   |   |
|--------------|------------|-----------------|----------|-----------|------------|-----|-----|-----|---|---|---|
| TCGA-20-1685 | CELSR2     | ENST00000271332 | p.K795K  | c.2385G>A | Unverified | CAG | AAG | TCC | 3 | G | A |
| TCGA-09-0369 | CELSR3     | ENST00000164024 | p.V749I  | c.2245G>A | Verified   | GAC | GTT | AAT | 1 | G | A |
| TCGA-09-0369 | CELSR3     | ENST00000164024 | p.V749I  | c.2245G>A | Verified   | GAC | GTT | AAT | 1 | G | A |
| TCGA-13-1489 | CELSR3     | ENST00000164024 | p.G706S  | c.2116G>A | Verified   | ACT | GGC | TGG | 1 | G | A |
| TCGA-04-1337 | CELSR3     | ENST00000164024 | p.S2382N | c.7145G>A | Unverified | AGC | AGC | AGC | 2 | G | A |
| TCGA-29-1763 | CELSR3     | ENST00000164024 | p.R3201Q | c.9602G>A | Unverified | TCT | CGG | GAG | 2 | G | A |
| TCGA-24-2288 | CELSR3     | ENST00000164024 | p.G292G  | c.876G>A  | Unverified | CCC | GGG | CCG | 3 | G | A |
| TCGA-29-1699 | CEP250     | ENST00000397527 | p.R2376H | c.7127G>A | Unverified | ACC | CGC | TCA | 2 | G | A |
| TCGA-61-2094 | CERKL      | ENST00000410087 | p.V510I  | c.1528G>A | Unverified | GAG | GTC | CAT | 1 | G | A |
| TCGA-23-1029 | CFH        | ENST00000367429 | p.P1166P | c.3498G>A | Unverified | cat | ccg | tgt | 3 | G | A |
| TCGA-61-1738 | CFHR1      | ENST00000320493 | p.Q238Q  | c.714G>A  | Unverified | TGC | CAG | AAC | 3 | G | A |
| TCGA-61-1738 | CFHR1      | ENST00000320493 | p.Q238Q  | c.714G>A  | Unverified | TGC | CAG | AAC | 3 | G | A |
| TCGA-04-1337 | CFP        | ENST00000396992 | p.E4K    | c.10G>A   | Unverified | aca | gag | gga | 1 | G | A |
| TCGA-13-0920 | CGN        | ENST00000271636 | p.E1137K | c.3409G>A | Verified   | GAG | GAG | CAG | 1 | G | A |
| TCGA-13-0760 | CGN        | ENST00000271636 | p.E1051E | c.3153G>A | Verified   | CTT | GAG | TCC | 3 | G | A |
| TCGA-29-1695 | CGNL1      | ENST00000281282 | p.A592T  | c.1774G>A | Unverified | CGA | GCA | GCT | 1 | G | A |
| TCGA-13-1512 | CHAD       | ENST00000258969 | p.R312Q  | c.935G>A  | Verified   | CTT | CGG | CGG | 2 | G | A |
| TCGA-29-1764 | CHAT       | ENST00000337653 | p.G130G  | c.390G>A  | Unverified | TCT | GGG | CTG | 3 | G | A |
| TCGA-24-1845 | CHCHD1     | ENST00000372833 | p.L21L   | c.63G>A   | Unverified | GTG | CTG | AAG | 3 | G | A |
| TCGA-24-1422 | CHD4_ENST0 | ENST00000309577 | p.G616E  | c.1847G>A | Verified   | TAT | GGG | ATA | 2 | G | A |
| TCGA-13-0755 | CHD6       | ENST00000373233 | p.V1289M | c.3865G>A | Verified   | ggc | gtg | ttc | 1 | G | A |
| TCGA-61-1737 | CHD7       | ENST00000423902 | p.R809H  | c.2426G>A | Unverified | AGT | CGT | TCA | 2 | G | A |
| TCGA-61-1737 | CHD7_ENST0 | ENST00000423902 | p.R809H  | c.2426G>A | Unverified | AGT | CGT | TCA | 2 | G | A |
| TCGA-04-1338 | CHD8       | ENST00000399982 | p.C958Y  | c.2873G>A | Verified   | aat | tgc | aag | 2 | G | A |
| TCGA-13-0760 | CHD8       | ENST00000399982 | p.R1092H | c.3275G>A | Verified   | ttg | cgc | aag | 2 | G | A |
| TCGA-09-0369 | CHEK2      | ENST00000328354 | p.R519Q  | c.1556G>A | Unverified | agt | cga | aag | 2 | G | A |
| TCGA-09-0369 | CHEK2      | ENST00000328354 | p.R519Q  | c.1556G>A | Unverified | agt | cga | aag | 2 | G | A |
| TCGA-13-0714 | CHEK2      | ENST00000328354 | p.R519Q  | c.1556G>A | Unverified | agt | cga | aag | 2 | G | A |
| TCGA-13-0760 | CHEK2      | ENST00000328354 | p.R519Q  | c.1556G>A | Unverified | agt | cga | aag | 2 | G | A |
| TCGA-13-0762 | CHEK2      | ENST00000328354 | p.R519Q  | c.1556G>A | Unverified | agt | cga | aag | 2 | G | A |
| TCGA-13-0762 | CHEK2      | ENST00000328354 | p.R519Q  | c.1556G>A | Unverified | agt | cga | aag | 2 | G | A |
| TCGA-13-0762 | CHEK2      | ENST00000328354 | p.R535H  | c.1604G>A | Unverified | aag | cgc | cca | 2 | G | A |
| TCGA-13-0762 | CHEK2      | ENST00000328354 | p.R535H  | c.1604G>A | Unverified | aag | cgc | cca | 2 | G | A |
| TCGA-24-1103 | CHIA       | ENST00000430615 | p.E197E  | c.591G>A  | Verified   | TAC | GAG | ATC | 3 | G | A |

|              |                       |                 |          |           |            |     |     |     |   |   |   |
|--------------|-----------------------|-----------------|----------|-----------|------------|-----|-----|-----|---|---|---|
| TCGA-13-0792 | CHMP4A                | ENST00000347519 | p.E254K  | c.760G>A  | Verified   | GAT | GAA | GAA | 1 | G | A |
| TCGA-13-0791 | CHMP5                 | ENST00000223500 | p.K62K   | c.186G>A  | Verified   | GTC | AAG | CAG | 3 | G | A |
| TCGA-13-0905 | CHP                   | ENST00000334660 | p.A156T  | c.466G>A  | Verified   | ATC | GCA | GAC | 1 | G | A |
| TCGA-24-1431 | CHRD                  | ENST00000204604 | p.G513R  | c.1537G>A | Verified   | GAC | GGA | GAG | 1 | G | A |
| TCGA-13-0791 | CHRM2                 | ENST00000320658 | p.R52H   | c.155G>A  | Verified   | AAC | CGC | CAC | 2 | G | A |
| TCGA-13-0791 | CHRM3                 | ENST00000255380 | p.V443I  | c.1327G>A | Verified   | GAC | GTC | AAC | 1 | G | A |
| TCGA-61-2095 | CHRNA9                | ENST00000310169 | p.G300D  | c.899G>A  | Unverified | ATA | GGT | AAA | 2 | G | A |
| TCGA-29-1701 | CHRN2                 | ENST00000368476 | p.E30K   | c.88G>A   | Unverified | GAG | GAG | CGG | 1 | G | A |
| TCGA-61-1915 | CHRN2                 | ENST00000368476 | p.R365Q  | c.1094G>A | Unverified | CGG | CGA | CGC | 2 | G | A |
| TCGA-13-0905 | CHST2                 | ENST00000309575 | p.A372A  | c.1116G>A | Verified   | GCC | GCG | GGC | 3 | G | A |
| TCGA-13-0807 | CIB3                  | ENST00000269878 | p.M172I  | c.516G>A  | Verified   | aac | atg | atc | 3 | G | A |
| TCGA-24-2267 | CIB4                  | ENST00000288861 | p.V85M   | c.253G>A  | Verified   | gat | gtg | ctg | 1 | G | A |
| TCGA-61-2009 | CILP                  | ENST00000261883 | p.R73Q   | c.218G>A  | Verified   | GAG | CGG | CTG | 2 | G | A |
| TCGA-23-1031 | CIT                   | SU_CR1K         | p.G1440S | c.4318G>A | Verified   | tgc | ggc | ttg | 1 | G | A |
| TCGA-61-2102 | CIT                   | SU_CR1K         | p.G1935S | c.5803G>A | Verified   | tcc | ggc | act | 1 | G | A |
| TCGA-04-1343 | CIT                   | SU_CR1K         | p.R713H  | c.2138G>A | Verified   | gag | cgt | aga | 2 | G | A |
| TCGA-20-1686 | CIT                   | SU_CR1K         | p.L2L    | c.6G>A    | Unverified | atg | ttg | aag | 3 | G | A |
| TCGA-25-1313 | CIT_ENST00000261833   | ENST00000261833 | p.P1871P | c.5613G>A | Unverified | AAC | CCG | CGC | 3 | G | A |
| TCGA-20-1686 | CIT_ENST00000261833   | ENST00000261833 | p.L2L    | c.6G>A    | Unverified | ATG | TTG | AAG | 3 | G | A |
| TCGA-20-1686 | CIT_ENST00000392521   | ENST00000392521 | p.L2L    | c.6G>A    | Unverified | ATG | TTG | AAG | 3 | G | A |
| TCGA-61-1738 | CLASP1                | ENST00000263710 | p.E408K  | c.1222G>A | Unverified | GCT | GAA | GCC | 1 | G | A |
| TCGA-61-1738 | CLASP1                | ENST00000263710 | p.E408K  | c.1222G>A | Unverified | GCT | GAA | GCC | 1 | G | A |
| TCGA-24-1850 | CLCC1                 | ENST00000369970 | p.V96I   | c.286G>A  | Unverified | CCT | GTT | TTT | 1 | G | A |
| TCGA-24-1850 | CLCC1_ENST00000369971 | ENST00000369971 | p.V96I   | c.286G>A  | Unverified | CCT | GTT | TTT | 1 | G | A |
| TCGA-29-1769 | CLCN1                 | ENST00000343257 | p.V448V  | c.1344G>A | Unverified | GCT | GTG | TGG | 3 | G | A |
| TCGA-30-1718 | CLCN3                 | ENST00000347613 | p.R95Q   | c.284G>A  | Unverified | GTG | CGA | GAA | 2 | G | A |
| TCGA-24-1846 | CLCN6                 | ENST00000346436 | p.R362H  | c.1085G>A | Unverified | TAC | CGT | ATG | 2 | G | A |
| TCGA-61-1733 | CLDN6                 | ENST00000396925 | p.V42M   | c.124G>A  | Unverified | GTG | GTG | GCC | 1 | G | A |
| TCGA-61-1733 | CLDN6                 | ENST00000396925 | p.V42M   | c.124G>A  | Unverified | GTG | GTG | GCC | 1 | G | A |
| TCGA-29-1690 | CLEC18A               | ENST00000288040 | p.P38P   | c.114G>A  | Unverified | GCT | CCG | ATG | 3 | G | A |
| TCGA-23-2077 | CLEC18B               | ENST00000339953 | p.R165Q  | c.494G>A  | Unverified | GGG | CGG | CAC | 2 | G | A |
| TCGA-23-1021 | CLIP3                 | ENST00000360535 | p.A425T  | c.1273G>A | Verified   | GTC | GCG | GGC | 1 | G | A |
| TCGA-61-1915 | CLN3                  | ENST00000359984 | p.A103A  | c.309G>A  | Unverified | CTG | GCG | GAC | 3 | G | A |
| TCGA-29-1711 | CLRN1                 | ENST00000327047 | p.G68E   | c.203G>A  | Unverified | CAC | GGA | GAG | 2 | G | A |

|              |            |                 |          |           |            |     |     |     |   |   |   |
|--------------|------------|-----------------|----------|-----------|------------|-----|-----|-----|---|---|---|
| TCGA-29-1711 | CLRN1      | ENST00000327047 | p.G68E   | c.203G>A  | Unverified | CAC | GGA | GAG | 2 | G | A |
| TCGA-09-1674 | CMYA5      | ENST00000238522 | p.P1948P | c.5844G>A | Unverified | CTG | CCG | CAT | 3 | G | A |
| TCGA-09-1674 | CMYA5_ENS  | ENST00000446378 | p.P1948P | c.5844G>A | Unverified | CTG | CCG | CAT | 3 | G | A |
| TCGA-13-0714 | CNGA3      | ENST00000272602 | p.V529M  | c.1585G>A | Verified   | GCC | GTG | GTG | 1 | G | A |
| TCGA-61-1915 | CNGB1      | ENST00000251102 | p.L1142L | c.3426G>A | Unverified | GCG | CTG | GAG | 3 | G | A |
| TCGA-24-1563 | CNGB3      | ENST00000320005 | p.A305T  | c.913G>A  | Verified   | GTC | GCA | TCA | 1 | G | A |
| TCGA-23-1116 | CNKSR1     | ENST00000361530 | p.W486*  | c.1457G>A | Unverified | ATG | TGG | GTG | 2 | G | A |
| TCGA-24-2280 | CNTFR      | ENST00000351266 | p.A299T  | c.895G>A  | Unverified | CAC | GCT | ACG | 1 | G | A |
| TCGA-29-1703 | CNTN4      | ENST00000397459 | p.S198S  | c.594G>A  | Unverified | CAC | TCG | CTA | 3 | G | A |
| TCGA-29-1703 | CNTN4_ENS  | ENST00000418658 | p.S526S  | c.1578G>A | Unverified | CAC | TCG | CTA | 3 | G | A |
| TCGA-09-1674 | CNTN6      | ENST00000446702 | p.V894I  | c.2680G>A | Unverified | CCA | GTC | AAT | 1 | G | A |
| TCGA-13-0884 | CNTNAP1    | ENST00000264638 | p.W623*  | c.1869G>A | Verified   | GCG | TGG | ACA | 3 | G | A |
| TCGA-30-1856 | CNTNAP2    | ENST00000361727 | p.A380T  | c.1138G>A | Unverified | AAC | GCT | ACA | 1 | G | A |
| TCGA-61-2008 | CNTNAP2    | ENST00000361727 | p.A667T  | c.1999G>A | Verified   | AGC | GCC | TCC | 1 | G | A |
| TCGA-61-1998 | CNTNAP4    | ENST00000339740 | p.R374Q  | c.1121G>A | Verified   | TTT | CGA | ACT | 2 | G | A |
| TCGA-61-1895 | CNTNAP4_E  | ENST00000307431 | p.V1009M | c.3025G>A | Unverified | TCC | GTG | ATA | 1 | G | A |
| TCGA-61-1895 | CNTNAP4_E  | ENST00000478060 | p.V937M  | c.2809G>A | Unverified | TCC | GTG | ATA | 1 | G | A |
| TCGA-13-0791 | CNTNAP5    | ENST00000431078 | p.V1168I | c.3502G>A | Verified   | TCC | GTC | CAG | 1 | G | A |
| TCGA-25-2042 | COL11A1    | ENST00000358392 | p.E342E  | c.1026G>A | Verified   | AAT | GAG | CCA | 3 | G | A |
| TCGA-13-1509 | COL13A1    | ENST00000398969 | p.K326K  | c.978G>A  | Verified   | ATG | AAG | GGT | 3 | G | A |
| TCGA-29-1784 | COL14A1    | ENST00000297848 | p.R844Q  | c.2531G>A | Unverified | aac | cgg | ttg | 2 | G | A |
| TCGA-61-1737 | COL14A1    | ENST00000297848 | p.V837V  | c.2511G>A | Unverified | cgg | gtg | tcc | 3 | G | A |
| TCGA-24-1469 | COL15A1    | ENST00000375001 | p.G434G  | c.1302G>A | Verified   | CCC | GGG | GAG | 3 | G | A |
| TCGA-23-1022 | COL16A1    | ENST00000373672 | p.A622T  | c.1864G>A | Verified   | CCA | GCA | GGC | 1 | G | A |
| TCGA-30-1718 | COL17A1    | ENST00000353479 | p.P1004P | c.3012G>A | Unverified | CCT | CCG | GGC | 3 | G | A |
| TCGA-23-1022 | COL1A2     | ENST00000297268 | p.G937S  | c.2809G>A | Verified   | CCA | GGT | CGC | 1 | G | A |
| TCGA-24-2262 | COL1A2     | ENST00000297268 | p.A843T  | c.2527G>A | Verified   | TTC | GCT | GGT | 1 | G | A |
| TCGA-61-2012 | COL20A1    | ENST00000358894 | p.S49S   | c.147G>A  | Unverified | GAG | TCG | GAG | 3 | G | A |
| TCGA-10-0930 | COL21A1    | ENST00000244728 | p.D176N  | c.526G>A  | Verified   | GAA | GAT | GCC | 1 | G | A |
| TCGA-10-0930 | COL21A1    | ENST00000244728 | p.D176N  | c.526G>A  | Verified   | GAA | GAT | GCC | 1 | G | A |
| TCGA-24-1563 | COL21A1    | ENST00000244728 | p.D227N  | c.679G>A  | Verified   | CGT | GAT | GAA | 1 | G | A |
| TCGA-04-1651 | COL2A1     | ENST00000337299 | p.V1100I | c.3298G>A | Unverified | CCC | GTC | GGT | 1 | G | A |
| TCGA-04-1651 | COL2A1     | ENST00000337299 | p.V1100I | c.3298G>A | Unverified | CCC | GTC | GGT | 1 | G | A |
| TCGA-04-1651 | COL2A1_ENS | ENST00000380518 | p.V1169I | c.3505G>A | Unverified | CCC | GTC | GGT | 1 | G | A |

|              |            |                     |          |           |            |     |     |     |   |   |   |
|--------------|------------|---------------------|----------|-----------|------------|-----|-----|-----|---|---|---|
| TCGA-04-1651 | COL2A1_EN' | ENST00000380518     | p.V1169I | c.3505G>A | Unverified | CCC | GTC | GGT | 1 | G | A |
| TCGA-04-1542 | COL3A1     | ENST00000304636     | p.G294E  | c.881G>A  | Verified   | AAT | GGA | GCT | 2 | G | A |
| TCGA-10-0930 | COL4A5     | ENST00000361603     | p.R1674Q | c.5021G>A | Verified   | aca | cga | att | 2 | G | A |
| TCGA-10-0930 | COL4A5     | ENST00000361603     | p.R1674Q | c.5021G>A | Verified   | aca | cga | att | 2 | G | A |
| TCGA-24-2035 | COL4A6     | ENST00000334504     | p.V1478V | c.4434G>A | Verified   | CAG | GTG | CCC | 3 | G | A |
| TCGA-13-1512 | COL5A1     | ENST00000371817     | p.D1657N | c.4969G>A | Verified   | GTC | GAT | CCT | 1 | G | A |
| TCGA-13-0887 | COL5A2     | ENST00000374866     | p.R1453Q | c.4358G>A | Verified   | AAG | CGG | AAT | 2 | G | A |
| TCGA-29-1763 | COL5A2     | ENST00000374866     | p.G795D  | c.2384G>A | Unverified | GAT | GGT | GCA | 2 | G | A |
| TCGA-24-1463 | COL5A3     | ENST00000264828     | p.T1730T | c.5190G>A | Verified   | CAG | ACG | AAC | 3 | G | A |
| TCGA-29-1699 | COL6A5     | ENST00000265379     | p.D2190N | c.6568G>A | Unverified | AAT | GAT | GGT | 1 | G | A |
| TCGA-61-1914 | COL6A6     | ENST00000358511     | p.D964N  | c.2890G>A | Unverified | AGC | GAC | AAG | 1 | G | A |
| TCGA-61-1914 | COL6A6_EN' | ENST00000358511_v70 | p.D964N  | c.2890G>A | Unverified | AGC | GAC | AAG | 1 | G | A |
| TCGA-24-2290 | COL7A1     | ENST00000328333     | p.L883L  | c.2649G>A | Verified   | TCG | CTG | AGG | 3 | G | A |
| TCGA-24-2290 | COL7A1     | ENST00000328333     | p.L883L  | c.2649G>A | Verified   | TCG | CTG | AGG | 3 | G | A |
| TCGA-24-1846 | COL8A1     | ENST00000273342     | p.R709K  | c.2126G>A | Unverified | CTC | AGG | CCC | 2 | G | A |
| TCGA-23-2077 | COL9A2     | ENST00000372748     | p.D141N  | c.421G>A  | Verified   | GGG | GAC | CCT | 1 | G | A |
| TCGA-23-1022 | COPB2      | ENST00000333188     | p.G855R  | c.2563G>A | Verified   | GAT | GGG | AAA | 1 | G | A |
| TCGA-23-1114 | COPS4      | ENST00000264389     | p.G135E  | c.404G>A  | Unverified | aca | gga | caa | 2 | G | A |
| TCGA-13-1499 | CORO2B     | ENST00000566799     | p.R113Q  | c.338G>A  | Verified   | GTG | CGG | ATC | 2 | G | A |
| TCGA-04-1367 | COX15      | ENST00000016171     | p.E115K  | c.343G>A  | Verified   | caa | gag | gaa | 1 | G | A |
| TCGA-24-1474 | CPAMD8     | ENST00000291440     | p.R1270H | c.3809G>A | Unverified | GCT | CGC | AGC | 2 | G | A |
| TCGA-20-0990 | CPNE3      | ENST00000198765     | p.G295R  | c.883G>A  | Verified   | GTG | GGA | GTG | 1 | G | A |
| TCGA-29-1761 | CPO        | ENST00000272852     | p.L11L   | c.33G>A   | Unverified | CTT | TTG | GGG | 3 | G | A |
| TCGA-61-1737 | CPSF2      | ENST00000298875     | p.Q133Q  | c.399G>A  | Unverified | TCT | CAG | ATT | 3 | G | A |
| TCGA-61-2113 | CPT1A      | ENST00000265641     | p.S371S  | c.1113G>A | Unverified | ACC | TCG | GAG | 3 | G | A |
| TCGA-24-1470 | CPT1B      | ENST00000395650     | p.D429N  | c.1285G>A | Verified   | TAT | GAC | CCC | 1 | G | A |
| TCGA-24-1474 | CPZ        | ENST00000360986     | p.R203H  | c.608G>A  | Unverified | TCC | CGC | TGC | 2 | G | A |
| TCGA-23-1809 | CRB1       | ENST00000367400     | p.D730N  | c.2188G>A | Unverified | CTT | GAT | GAG | 1 | G | A |
| TCGA-13-0919 | CREG2      | ENST00000324768     | p.R279K  | c.836G>A  | Verified   | TCA | AGG | GAG | 2 | G | A |
| TCGA-24-2290 | CRHR2      | ENST00000471646     | p.L316L  | c.948G>A  | Verified   | CTC | CTG | CCC | 3 | G | A |
| TCGA-24-2290 | CRHR2      | ENST00000471646     | p.L316L  | c.948G>A  | Verified   | CTC | CTG | CCC | 3 | G | A |
| TCGA-29-1690 | CRIPAK     | ENST00000324803     | p.A44T   | c.130G>A  | Unverified | CCC | GCC | TGC | 1 | G | A |
| TCGA-09-1674 | CRISP3     | ENST00000263045     | p.V43V   | c.129G>A  | Unverified | ATT | GTG | AAT | 3 | G | A |
| TCGA-13-0795 | CRNKL1     | ENST00000377340     | p.R553K  | c.1658G>A | Verified   | GAG | AGG | ACA | 2 | G | A |

|              |            |                 |          |            |            |     |     |     |   |   |   |
|--------------|------------|-----------------|----------|------------|------------|-----|-----|-----|---|---|---|
| TCGA-23-1124 | CRTAC1     | ENST00000370597 | p.E534K  | c.1600G>A  | Verified   | GAT | GAG | GAC | 1 | G | A |
| TCGA-29-1691 | CSAD       | ENST00000308926 | p.V345M  | c.1033G>A  | Unverified | GAT | GTG | GCT | 1 | G | A |
| TCGA-29-1691 | CSAD_ENST0 | ENST00000267085 | p.V372M  | c.1114G>A  | Unverified | GAT | GTG | GCT | 1 | G | A |
| TCGA-04-1338 | CSF1       | ENST00000369802 | p.V135I  | c.403G>A   | Verified   | TGC | GTC | CGA | 1 | G | A |
| TCGA-29-1784 | CSF2RA     | ENST00000381529 | p.D181N  | c.541G>A   | Unverified | ctg | gat | aac | 1 | G | A |
| TCGA-13-0885 | CSF2RA     | ENST00000381529 | p.R146H  | c.437G>A   | Verified   | ccc | cgt | gac | 2 | G | A |
| TCGA-29-1784 | CSF2RA_ENS | ENST00000355432 | p.D181N  | c.541G>A   | Unverified | CTG | GAT | AAC | 1 | G | A |
| TCGA-29-1784 | CSF2RA_ENS | ENST00000381509 | p.D181N  | c.541G>A   | Unverified | CTG | GAT | AAC | 1 | G | A |
| TCGA-25-2042 | CSF2RB     | ENST00000403662 | p.W514*  | c.1541G>A  | Unverified | CCG | TGG | GGC | 2 | G | A |
| TCGA-23-1124 | CSF3       | ENST00000331769 | p.A10T   | c.28G>A    | Verified   | CCA | GCC | CTG | 1 | G | A |
| TCGA-29-1763 | CSMD1_ENS  | ENST00000537824 | p.G1928R | c.5782G>A  | Unverified | ATC | GGA | GAT | 1 | G | A |
| TCGA-04-1342 | CSMD2      | ENST00000241312 | p.T3195T | c.9585G>A  | Verified   | GAG | ACG | CCA | 3 | G | A |
| TCGA-23-2077 | CSMD2      | ENST00000241312 | p.E1334E | c.4002G>A  | Verified   | GTG | GAG | AGC | 3 | G | A |
| TCGA-13-0793 | CSMD3      | ENST00000297405 | p.E392K  | c.1174G>A  | Verified   | tcc | gag | gaa | 1 | G | A |
| TCGA-13-0884 | CSMD3      | ENST00000297405 | p.G863E  | c.2588G>A  | Verified   | gaa | gga | ttt | 2 | G | A |
| TCGA-29-1770 | CSMD3      | ENST00000297405 | p.R3391H | c.10172G>A | Unverified | aca | cgc | acc | 2 | G | A |
| TCGA-29-1770 | CSMD3_ENS  | ENST00000343508 | p.R3351H | c.10052G>A | Unverified | ACA | CGC | ACC | 2 | G | A |
| TCGA-04-1530 | CSNK1A1L   | ENST00000379800 | p.R106K  | c.317G>A   | Unverified | TCA | AGA | AGG | 2 | G | A |
| TCGA-30-1718 | CSPG4      | ENST00000308508 | p.R1557H | c.4670G>A  | Unverified | ttc | cgc | ttc | 2 | G | A |
| TCGA-25-1313 | CSRNP3     | ENST00000342316 | p.R97H   | c.290G>A   | Verified   | AGC | CGC | CAT | 2 | G | A |
| TCGA-61-1998 | CSTF2T     | ENST00000331173 | p.M140I  | c.420G>A   | Verified   | CAG | ATG | TTT | 3 | G | A |
| TCGA-23-1114 | CTNNBIP1   | ENST00000377263 | p.V68V   | c.204G>A   | Unverified | gtg | gtg | atg | 3 | G | A |
| TCGA-25-2392 | CTNNBL1    | ENST00000361383 | p.R522Q  | c.1565G>A  | Verified   | atg | cga | gga | 2 | G | A |
| TCGA-25-2400 | CTPS2      | ENST00000443824 | p.E349K  | c.1045G>A  | Verified   | acc | gag | gac | 1 | G | A |
| TCGA-09-2049 | CTSG       | ENST00000216336 | p.T140T  | c.420G>A   | Verified   | GGG | ACG | CTG | 3 | G | A |
| TCGA-04-1655 | CTTNBP2    | ENST00000160373 | p.V584V  | c.1752G>A  | Unverified | ACT | GTG | GCT | 3 | G | A |
| TCGA-09-2050 | CUBN       | ENST00000377833 | p.S3124N | c.9371G>A  | Verified   | AGC | AGC | AAT | 2 | G | A |
| TCGA-13-0893 | CUL2       | ENST00000374751 | p.?      | c.715-1G>A | Verified   | aag | gtt | cta | 1 | G | A |
| TCGA-13-0883 | CUL7       | ENST00000265348 | p.V535M  | c.1603G>A  | Verified   | gcc | gtg | ccc | 1 | G | A |
| TCGA-23-1111 | CUL9       | ENST00000252050 | p.W361*  | c.1082G>A  | Unverified | GGG | TGG | GTC | 2 | G | A |
| TCGA-24-1423 | CUX1       | ENST00000292535 | p.A769T  | c.2305G>A  | Verified   | TCC | GCA | GCT | 1 | G | A |
| TCGA-23-1114 | CUZD1      | ENST00000368904 | p.M48I   | c.144G>A   | Unverified | GCC | ATG | ATC | 3 | G | A |
| TCGA-30-1857 | CXCR2      | ENST00000318507 | p.G79S   | c.235G>A   | Unverified | gtc | ggc | cgc | 1 | G | A |
| TCGA-29-1781 | CXorf59    | ENST00000378660 | p.V425M  | c.1273G>A  | Unverified | AGG | GTG | TTT | 1 | G | A |



|              |            |                 |         |           |            |     |     |     |   |   |   |
|--------------|------------|-----------------|---------|-----------|------------|-----|-----|-----|---|---|---|
| TCGA-24-1422 | CYCS       | ENST00000305786 | p.K87K  | c.261G>A  | Verified   | att | aag | aag | 3 | G | A |
| TCGA-23-1124 | CYFIP1     | ENST00000313077 | p.M824I | c.2472G>A | Verified   | GCC | ATG | TTC | 3 | G | A |
| TCGA-09-2051 | CYHR1      | ENST00000306145 | p.A115T | c.343G>A  | Unverified | GTG | GCT | GGT | 1 | G | A |
| TCGA-20-1686 | CYLC1      | ENST00000329312 | p.R95R  | c.285G>A  | Unverified | GCC | AGG | GAA | 3 | G | A |
| TCGA-20-1686 | CYLC1_ENST | ENST00000329312 | p.R95R  | c.285G>A  | Unverified | GCC | AGG | GAA | 3 | G | A |
| TCGA-61-1737 | CYP11B1    | ENST00000292427 | p.R123H | c.368G>A  | Unverified | CAT | CGT | GGG | 2 | G | A |
| TCGA-29-1695 | CYP11B2    | ENST00000323110 | p.E74E  | c.222G>A  | Unverified | CAG | GAG | CTG | 3 | G | A |
| TCGA-61-1998 | CYP2A13    | ENST00000330436 | p.G5E   | c.14G>A   | Verified   | TCA | GGG | CTG | 2 | G | A |
| TCGA-24-1469 | CYP2A6     | ENST00000301141 | p.M6I   | c.18G>A   | Verified   | GGG | ATG | CTT | 3 | G | A |
| TCGA-20-1683 | CYP2B7P1   | ENST00000330446 | p.E149K | c.445G>A  | Unverified | GAC | GAG | GCT | 1 | G | A |
| TCGA-10-0930 | CYP2C9     | ENST00000260682 | p.L313L | c.939G>A  | Verified   | CTC | CTG | CTG | 3 | G | A |
| TCGA-10-0930 | CYP2C9     | ENST00000260682 | p.L313L | c.939G>A  | Verified   | CTC | CTG | CTG | 3 | G | A |
| TCGA-13-0885 | CYP3A7     | ENST00000336374 | p.R162R | c.486G>A  | Verified   | AGG | CGG | GAA | 3 | G | A |
| TCGA-61-1907 | CYP4A11    | ENST00000310638 | p.C347Y | c.1040G>A | Unverified | AGG | TGC | CGG | 2 | G | A |
| TCGA-13-0903 | CYP4F3     | ENST00000221307 | p.L80L  | c.240G>A  | Verified   | AGC | CTG | GCA | 3 | G | A |
| TCGA-24-1604 | CYP7B1     | ENST00000310193 | p.E272K | c.814G>A  | Verified   | CTG | GAG | AAA | 1 | G | A |
| TCGA-24-1849 | CYP7B1     | ENST00000310193 | p.D384N | c.1150G>A | Unverified | GGG | GAC | TAC | 1 | G | A |
| TCGA-30-1856 | CYP7B1     | ENST00000310193 | p.V200I | c.598G>A  | Unverified | AAA | GTT | ATT | 1 | G | A |
| TCGA-24-2262 | DAAM2      | ENST00000538976 | p.R452Q | c.1355G>A | Verified   | ttc | cgg | aaa | 2 | G | A |
| TCGA-23-1120 | DACH1      | ENST00000305425 | p.A398T | c.1192G>A | Unverified | CCA | GCA | TCT | 1 | G | A |
| TCGA-61-1904 | DACT1      | ENST00000335867 | p.D675N | c.2023G>A | Unverified | act | gac | tac | 1 | G | A |
| TCGA-13-0714 | DAG1       | ENST00000308775 | p.V656M | c.1966G>A | Verified   | ATC | GTG | GTG | 1 | G | A |
| TCGA-29-1691 | DAGLA      | ENST00000257215 | p.E738E | c.2214G>A | Unverified | TCG | GAG | GGG | 3 | G | A |
| TCGA-20-1687 | DCAF12L2   | ENST00000538699 | p.S390N | c.1169G>A | Unverified | tcc | agc | ctg | 2 | G | A |
| TCGA-29-1696 | DCAF12L2   | ENST00000538699 | p.R337H | c.1010G>A | Unverified | cag | cgc | cag | 2 | G | A |
| TCGA-29-1696 | DCAF12L2   | ENST00000538699 | p.R337H | c.1010G>A | Unverified | cag | cgc | cag | 2 | G | A |
| TCGA-29-1775 | DCAF4L2    | ENST00000319675 | p.R20K  | c.59G>A   | Unverified | GTC | AGA | GTG | 2 | G | A |
| TCGA-13-0920 | DCAF8L1    | ENST00000441525 | p.V396I | c.1186G>A | Verified   | tgc | gtt | gtg | 1 | G | A |
| TCGA-13-0791 | DCAF8L1    | ENST00000441525 | p.K429K | c.1287G>A | Verified   | gtt | aag | aga | 3 | G | A |
| TCGA-23-1117 | DCLK2      | ENST00000296550 | p.E594K | c.1780G>A | Verified   | AGT | GAG | AAC | 1 | G | A |
| TCGA-23-1117 | DCLK2      | ENST00000296550 | p.E594K | c.1780G>A | Verified   | AGT | GAG | AAC | 1 | G | A |
| TCGA-61-1915 | DCLK3      | ENST00000416516 | p.G339S | c.1015G>A | Unverified | agc | ggt | cgg | 1 | G | A |
| TCGA-23-1809 | DCTD       | ENST00000438320 | p.A23T  | c.67G>A   | Unverified | GTG | GCC | TTC | 1 | G | A |
| TCGA-24-2035 | DCTN2      | ENST00000434715 | p.A279T | c.835G>A  | Verified   | CTT | GCA | GTT | 1 | G | A |

|              |                       |                 |         |           |            |     |     |     |   |   |   |
|--------------|-----------------------|-----------------|---------|-----------|------------|-----|-----|-----|---|---|---|
| TCGA-24-2024 | DCTN6                 | ENST00000221114 | p.G46R  | c.136G>A  | Verified   | GCC | GGG | CCA | 1 | G | A |
| TCGA-29-1698 | DCX                   | ENST00000338081 | p.D156N | c.466G>A  | Unverified | tct | gac | cgt | 1 | G | A |
| TCGA-24-1845 | DCX                   | ENST00000338081 | p.G304E | c.911G>A  | Unverified | acc | ggg | gtt | 2 | G | A |
| TCGA-29-1698 | DCX_ENST00000356915   | ENST00000356915 | p.D75N  | c.223G>A  | Unverified | TCT | GAC | CGT | 1 | G | A |
| TCGA-24-1845 | DCX_ENST00000356915   | ENST00000356915 | p.G223E | c.668G>A  | Unverified | ACC | GGG | GTT | 2 | G | A |
| TCGA-24-1103 | DDC                   | ENST00000357936 | p.V184V | c.552G>A  | Verified   | CTG | GTG | GCT | 3 | G | A |
| TCGA-25-2393 | DDO                   | ENST00000368924 | p.V259I | c.775G>A  | Verified   | CAT | GTA | ACC | 1 | G | A |
| TCGA-23-1116 | DDX1                  | ENST00000381341 | p.E420K | c.1258G>A | Verified   | tcc | gag | aag | 1 | G | A |
| TCGA-23-1120 | DDX21                 | ENST00000354185 | p.G235G | c.705G>A  | Verified   | act | ggg | aag | 3 | G | A |
| TCGA-13-1507 | DDX39A                | ENST00000242776 | p.R174H | c.521G>A  | Unverified | ggc | cgc | atc | 2 | G | A |
| TCGA-13-0923 | DDX39B                | ENST00000396172 | p.G26R  | c.76G>A   | Verified   | GAT | GGG | GCT | 1 | G | A |
| TCGA-29-1785 | DDX4                  | ENST00000505374 | p.V444I | c.1330G>A | Unverified | TTA | GTT | TTG | 1 | G | A |
| TCGA-29-1785 | DDX4                  | ENST00000505374 | p.V444I | c.1330G>A | Unverified | TTA | GTT | TTG | 1 | G | A |
| TCGA-29-1785 | DDX4_ENST00000505374  | ENST00000505374 | p.V444I | c.1330G>A | Unverified | TTA | GTT | TTG | 1 | G | A |
| TCGA-29-1785 | DDX4_ENST00000505374  | ENST00000505374 | p.V444I | c.1330G>A | Unverified | TTA | GTT | TTG | 1 | G | A |
| TCGA-29-1785 | DDX4_ENST00000511853  | ENST00000511853 | p.V295I | c.883G>A  | Unverified | TTA | GTT | TTG | 1 | G | A |
| TCGA-29-1785 | DDX4_ENST00000511853  | ENST00000511853 | p.V295I | c.883G>A  | Unverified | TTA | GTT | TTG | 1 | G | A |
| TCGA-13-0923 | DDX41_ENST00000507955 | ENST00000507955 | p.E122K | c.364G>A  | Unverified | GCC | GAG | GGC | 1 | G | A |
| TCGA-13-1498 | DEFB118               | ENST00000253381 | p.V119I | c.355G>A  | Verified   | AAT | GTT | CAC | 1 | G | A |
| TCGA-13-0714 | DENND1A               | ENST00000373624 | p.Q585Q | c.1755G>A | Verified   | CTG | CAG | CCA | 3 | G | A |
| TCGA-30-1855 | DENND3                | ENST00000262585 | p.A787A | c.2361G>A | Unverified | GTG | GCG | TCC | 3 | G | A |
| TCGA-29-1705 | DENND5A               | ENST00000328194 | p.R607Q | c.1820G>A | Unverified | TCC | CGA | GTT | 2 | G | A |
| TCGA-24-2289 | DEPTOR                | NM_022783.1     | p.C190Y | c.569G>A  | Unverified | ctt | tgc | cac | 2 | G | A |
| TCGA-23-1117 | DGKA                  | ENST00000331886 | p.A314A | c.942G>A  | Verified   | caa | gcg | gtg | 3 | G | A |
| TCGA-23-1117 | DGKA                  | ENST00000331886 | p.A314A | c.942G>A  | Verified   | caa | gcg | gtg | 3 | G | A |
| TCGA-23-1124 | DGKB                  | ENST00000403951 | p.V214M | c.640G>A  | Verified   | ACC | GTG | TCT | 1 | G | A |
| TCGA-29-1784 | DGKB                  | ENST00000403951 | p.T163T | c.489G>A  | Unverified | GAC | ACG | GAT | 3 | G | A |
| TCGA-24-1846 | DGKG                  | ENST00000265022 | p.R370Q | c.1109G>A | Unverified | TGC | CGG | ATG | 2 | G | A |
| TCGA-29-1784 | DHCR24                | ENST00000371269 | p.M387I | c.1161G>A | Unverified | GAC | ATG | CTG | 3 | G | A |
| TCGA-24-2262 | DHRS13                | ENST00000378895 | p.E288K | c.862G>A  | Unverified | GTG | GAA | GAG | 1 | G | A |
| TCGA-20-0991 | DHRS2                 | ENST00000250383 | p.R30K  | c.89G>A   | Verified   | GAC | AGG | AAG | 2 | G | A |
| TCGA-13-0807 | DHRS7                 | ENST00000216500 | p.M312I | c.936G>A  | Verified   | AAG | ATG | GGG | 3 | G | A |
| TCGA-24-1470 | DHRSX                 | ENST00000334651 | p.E89K  | c.265G>A  | Unverified | AAA | GAA | GAA | 1 | G | A |
| TCGA-24-1422 | DHX16_ENST00000376442 | ENST00000376442 | p.A343T | c.1027G>A | Unverified | GGG | GCC | CGA | 1 | G | A |

|              |            |                 |          |            |            |     |     |     |   |   |   |
|--------------|------------|-----------------|----------|------------|------------|-----|-----|-----|---|---|---|
| TCGA-10-0930 | DHX30      | ENST00000445061 | p.L658L  | c.1974G>A  | Verified   | gat | ctg | gtt | 3 | G | A |
| TCGA-10-0930 | DHX30      | ENST00000445061 | p.L658L  | c.1974G>A  | Verified   | gat | ctg | gtt | 3 | G | A |
| TCGA-61-2095 | DHX37      | ENST00000308736 | p.E530K  | c.1588G>A  | Unverified | gct | gag | gtg | 1 | G | A |
| TCGA-29-1764 | DIABLO     | ENST00000443649 | p.L153L  | c.459G>A   | Unverified | aag | ctg | gaa | 3 | G | A |
| TCGA-24-1463 | DIDO1      | ENST00000395343 | p.D416N  | c.1246G>A  | Verified   | AAT | GAC | TGT | 1 | G | A |
| TCGA-13-0924 | DIDO1      | ENST00000395343 | p.S660N  | c.1979G>A  | Verified   | ATG | AGT | GCT | 2 | G | A |
| TCGA-24-1469 | DIP2A      | ENST00000417564 | p.G230S  | c.688G>A   | Verified   | ACG | GGC | CTC | 1 | G | A |
| TCGA-61-1904 | DIP2C      | ENST00000280886 | p.E1248K | c.3742G>A  | Unverified | ACA | GAG | TCC | 1 | G | A |
| TCGA-29-1691 | DIP2C      | ENST00000280886 | p.L683L  | c.2049G>A  | Unverified | GGA | CTG | ACC | 3 | G | A |
| TCGA-24-1422 | DIRAS1     | ENST00000323469 | p.V47M   | c.139G>A   | Unverified | cag | gtg | atc | 1 | G | A |
| TCGA-13-1501 | DIXDC1     | ENST00000389821 | p.G328D  | c.983G>A   | Verified   | CCA | GGT | GTC | 2 | G | A |
| TCGA-13-1501 | DIXDC1     | ENST00000389821 | p.G328D  | c.983G>A   | Verified   | CCA | GGT | GTC | 2 | G | A |
| TCGA-13-0900 | DLEC1      | ENST00000308059 | p.S1345S | c.4035G>A  | Verified   | TCA | TCG | GAA | 3 | G | A |
| TCGA-13-0792 | DLG1       | ENST00000346964 | p.S347N  | c.1040G>A  | Verified   | AAT | AGC | ATC | 2 | G | A |
| TCGA-24-1846 | DLG3       | ENST00000374360 | p.E680K  | c.2038G>A  | Unverified | cga | gaa | caa | 1 | G | A |
| TCGA-24-1846 | DLG3_ENST  | ENST00000374355 | p.E375K  | c.1123G>A  | Unverified | CGA | GAA | CAA | 1 | G | A |
| TCGA-23-1031 | DLG4       | ENST00000293813 | p.R559Q  | c.1676G>A  | Unverified | GGT | CGA | GAA | 2 | G | A |
| TCGA-29-1762 | DLGAP2_EN  | ENST00000356067 | p.G414R  | c.1240G>A  | Unverified | GTG | GGA | CAC | 1 | G | A |
| TCGA-30-1714 | DLGAP4_EN  | ENST00000340491 | p.G153R  | c.457G>A   | Unverified | ATC | GGG | GTT | 1 | G | A |
| TCGA-13-1488 | DMBX1      | NM_147192.2     | p.P291P  | c.873G>A   | Verified   | ggt | ccg | gcc | 3 | G | A |
| TCGA-13-1497 | DMC1       | ENST00000216024 | p.V7V    | c.21G>A    | Verified   | GTT | GTG | GCG | 3 | G | A |
| TCGA-29-1695 | DMKN       | ENST00000339686 | p.S276N  | c.827G>A   | Unverified | GGC | AGC | AGC | 2 | G | A |
| TCGA-13-0760 | DNAAF1     | ENST00000378553 | p.K362K  | c.1086G>A  | Verified   | GGC | AAG | GAG | 3 | G | A |
| TCGA-13-0913 | DNAH1_ENS  | ENST00000420323 | p.V3811M | c.11431G>A | Verified   | AAG | GTG | ATG | 1 | G | A |
| TCGA-29-1691 | DNAH10_EN  | ENST00000409039 | p.G2937R | c.8809G>A  | Unverified | GTG | GGG | GAC | 1 | G | A |
| TCGA-13-0916 | DNAH10_sai | ENST00000280576 | p.E1834K | c.5500G>A  | Unverified | GTT | GAA | GCT | 1 | G | A |
| TCGA-29-1691 | DNAH10_sai | ENST00000280576 | p.G1529R | c.4585G>A  | Unverified | GTG | GGG | GAC | 1 | G | A |
| TCGA-24-1847 | DNAH11     | ENST00000328843 | p.V2590M | c.7768G>A  | Unverified | GAA | GTG | GAC | 1 | G | A |
| TCGA-30-1857 | DNAH17     | ENST00000300671 | p.R3647H | c.10940G>A | Unverified | TAC | CGC | CCG | 2 | G | A |
| TCGA-29-1761 | DNAH17     | ENST00000300671 | p.P4396P | c.13188G>A | Unverified | ACC | CCG | GCC | 3 | G | A |
| TCGA-13-0920 | DNAH2      | ENST00000389173 | p.E833K  | c.2497G>A  | Verified   | ATG | GAG | GAT | 1 | G | A |
| TCGA-29-1785 | DNAH3      | ENST00000261383 | p.A3533T | c.10597G>A | Unverified | ATG | GCA | GGC | 1 | G | A |
| TCGA-29-1785 | DNAH3      | ENST00000261383 | p.A3533T | c.10597G>A | Unverified | ATG | GCA | GGC | 1 | G | A |
| TCGA-29-1785 | DNAH3_ENS  | ENST00000261383 | p.A3533T | c.10597G>A | Unverified | ATG | GCA | GGC | 1 | G | A |

|              |           |                 |          |            |            |     |     |     |   |   |   |
|--------------|-----------|-----------------|----------|------------|------------|-----|-----|-----|---|---|---|
| TCGA-29-1785 | DNAH3_ENS | ENST00000261383 | p.A3533T | c.10597G>A | Unverified | ATG | GCA | GGC | 1 | G | A |
| TCGA-13-0904 | DNAH5     | ENST00000265104 | p.V3245M | c.9733G>A  | Verified   | GAA | GTG | ACA | 1 | G | A |
| TCGA-61-1740 | DNAH7     | ENST00000312428 | p.C3027Y | c.9080G>A  | Unverified | AAT | TGC | ATC | 2 | G | A |
| TCGA-09-2051 | DNAH9     | ENST00000262442 | p.E389K  | c.1165G>A  | Unverified | GAA | GAA | AGT | 1 | G | A |
| TCGA-29-1699 | DNAJC6    | ENST00000395325 | p.D681N  | c.2041G>A  | Unverified | gcc | gac | ctt | 1 | G | A |
| TCGA-29-1763 | DNALI1    | ENST00000296218 | p.L170L  | c.510G>A   | Unverified | GGG | CTG | CTG | 3 | G | A |
| TCGA-24-1849 | DNASE1L3  | ENST00000394549 | p.L216L  | c.648G>A   | Unverified | TGG | CTG | ATC | 3 | G | A |
| TCGA-24-1422 | DNER      | ENST00000341772 | p.R684H  | c.2051G>A  | Verified   | TGC | CGC | AGC | 2 | G | A |
| TCGA-04-1361 | DNMT3A    | ENST00000321117 | p.A910T  | c.2728G>A  | Verified   | ttt | gcg | tgt | 1 | G | A |
| TCGA-04-1361 | DNMT3A    | ENST00000321117 | p.A910T  | c.2728G>A  | Verified   | ttt | gcg | tgt | 1 | G | A |
| TCGA-29-1691 | DOCK10    | ENST00000258390 | p.R2115H | c.6344G>A  | Unverified | GAG | CGC | CTC | 2 | G | A |
| TCGA-29-1691 | DOCK10_EN | ENST00000373702 | p.R624H  | c.1871G>A  | Unverified | GAG | CGC | CTC | 2 | G | A |
| TCGA-29-1783 | DOCK11    | ENST00000276202 | p.E343K  | c.1027G>A  | Unverified | TCA | GAA | GTT | 1 | G | A |
| TCGA-24-1844 | DOCK2     | ENST00000256935 | p.D1146N | c.3436G>A  | Unverified | GGC | GAC | GAG | 1 | G | A |
| TCGA-13-0807 | DOCK2     | ENST00000256935 | p.R854Q  | c.2561G>A  | Verified   | TGC | CGG | GAC | 2 | G | A |
| TCGA-23-1123 | DOCK3_ENS | ENST00000266037 | p.V1944I | c.5830G>A  | Verified   | GCC | GTC | CTG | 1 | G | A |
| TCGA-23-1123 | DOCK3_ENS | ENST00000266037 | p.V1944I | c.5830G>A  | Verified   | GCC | GTC | CTG | 1 | G | A |
| TCGA-13-0903 | DOCK6     | ENST00000319867 | p.R1967Q | c.5900G>A  | Verified   | TTC | CGG | CAT | 2 | G | A |
| TCGA-04-1649 | DOK3      | ENST00000357198 | p.T24T   | c.72G>A    | Unverified | GGG | ACG | GGA | 3 | G | A |
| TCGA-23-1122 | DOK5      | ENST00000262593 | p.K66K   | c.198G>A   | Verified   | gtg | aag | aac | 3 | G | A |
| TCGA-29-1699 | DOLK      | ENST00000372586 | p.V114M  | c.340G>A   | Unverified | GTG | GTG | GCA | 1 | G | A |
| TCGA-61-1913 | DOPEY1    | ENST00000349129 | p.V1009I | c.3025G>A  | Unverified | AGG | GTT | TCA | 1 | G | A |
| TCGA-29-1702 | DPM3      | ENST00000368399 | p.Q105Q  | c.315G>A   | Unverified | CTG | CAG | AGC | 3 | G | A |
| TCGA-24-1463 | DPP10     | ENST00000310323 | p.V408M  | c.1222G>A  | Verified   | ACC | GTG | CGG | 1 | G | A |
| TCGA-13-1501 | DPP4      | ENST00000360534 | p.A306T  | c.916G>A   | Verified   | TGG | GCA | ACA | 1 | G | A |
| TCGA-13-1501 | DPP4      | ENST00000360534 | p.A306T  | c.916G>A   | Verified   | TGG | GCA | ACA | 1 | G | A |
| TCGA-13-1497 | DPPA2     | ENST00000478945 | p.K200K  | c.600G>A   | Verified   | CCT | AAG | GCT | 3 | G | A |
| TCGA-13-0793 | DPY19L3   | ENST00000342179 | p.G335E  | c.1004G>A  | Verified   | ACT | GGA | AGC | 2 | G | A |
| TCGA-13-1481 | DPY19L3   | ENST00000342179 | p.E686E  | c.2058G>A  | Verified   | GAA | GAG | ATC | 3 | G | A |
| TCGA-29-1761 | DPY19L4   | ENST00000414645 | p.E118K  | c.352G>A   | Unverified | TAC | GAA | CTG | 1 | G | A |
| TCGA-13-0792 | DPYSL3    | ENST00000398514 | p.L459L  | c.1377G>A  | Verified   | AAC | CTG | CAC | 3 | G | A |
| TCGA-25-1313 | DPYSL5    | ENST00000288699 | p.?      | c.600+1G>A | Verified   | GCC | GAG | GGT | 3 | G | A |
| TCGA-29-1763 | DRD5      | ENST00000304374 | p.A22A   | c.66G>A    | Unverified | CTG | GCG | CAG | 3 | G | A |
| TCGA-13-0884 | DSCAM     | ENST00000400454 | p.E281K  | c.841G>A   | Verified   | ATT | GAG | AAC | 1 | G | A |

|              |            |                 |          |            |            |     |     |     |   |   |   |
|--------------|------------|-----------------|----------|------------|------------|-----|-----|-----|---|---|---|
| TCGA-61-1915 | DSCR4      | ENST00000328264 | p.A86T   | c.256G>A   | Unverified | TGG | GCA | AAA | 1 | G | A |
| TCGA-25-2391 | DSG4       | ENST00000308128 | p.D247N  | c.739G>A   | Unverified | GCA | GAT | GGA | 1 | G | A |
| TCGA-04-1638 | DSG4       | ENST00000308128 | p.A601A  | c.1803G>A  | Unverified | GCC | GCG | GGC | 3 | G | A |
| TCGA-04-1638 | DSG4_ENST0 | ENST00000359747 | p.A601A  | c.1803G>A  | Unverified | GCC | GCG | GGC | 3 | G | A |
| TCGA-13-0760 | DST        | ENST00000370765 | p.R689H  | c.2066G>A  | Verified   | TCT | CGT | TTT | 2 | G | A |
| TCGA-61-1914 | DST        | ENST00000370765 | p.A1654A | c.4962G>A  | Unverified | CTG | GCG | AAA | 3 | G | A |
| TCGA-61-1895 | DST_ENST0C | ENST00000244364 | p.R5140Q | c.15419G>A | Unverified | CCC | CGA | GCA | 2 | G | A |
| TCGA-61-1914 | DST_ENST0C | ENST00000370765 | p.A1654A | c.4962G>A  | Unverified | CTG | GCG | AAA | 3 | G | A |
| TCGA-13-0885 | DST_ENST0C | ENST00000370769 | p.A6644T | c.19930G>A | Verified   | TTT | GCC | AAT | 1 | G | A |
| TCGA-24-1469 | DST_ENST0C | ENST00000370769 | p.E3190K | c.9568G>A  | Verified   | AAT | GAG | GCA | 1 | G | A |
| TCGA-13-0760 | DST_ENST0C | ENST00000370769 | p.R1015H | c.3044G>A  | Verified   | TCT | CGT | TTT | 2 | G | A |
| TCGA-61-1895 | DST_ENST0C | ENST00000370769 | p.R7514Q | c.22541G>A | Unverified | CCC | CGA | GCA | 2 | G | A |
| TCGA-24-0979 | DTD1       | ENST00000377452 | p.E100E  | c.300G>A   | Verified   | ACG | GAG | CAG | 3 | G | A |
| TCGA-23-1032 | DTNB       | ENST00000406818 | p.R390H  | c.1169G>A  | Verified   | GCA | CGT | GTT | 2 | G | A |
| TCGA-24-1847 | DTX3       | ENST00000548804 | p.E113E  | c.339G>A   | Unverified | GGG | GAG | CAC | 3 | G | A |
| TCGA-13-0906 | DUOX2      | ENST00000389039 | p.E748K  | c.2242G>A  | Verified   | GCT | GAG | ATG | 1 | G | A |
| TCGA-04-1343 | DUSP1      | ENST00000239223 | p.V206I  | c.616G>A   | Verified   | AAC | GTC | TCA | 1 | G | A |
| TCGA-23-1124 | DUSP27     | ENST00000361200 | p.R964K  | c.2891G>A  | Verified   | ACC | AGA | TCG | 2 | G | A |
| TCGA-23-1809 | DUSP27     | ENST00000361200 | p.R1043H | c.3128G>A  | Unverified | TTC | CGC | CGG | 2 | G | A |
| TCGA-29-1783 | DYNC1H1    | ENST00000360184 | p.A2951T | c.8851G>A  | Unverified | GTC | GCC | TGG | 1 | G | A |
| TCGA-13-0760 | DYNC1I1    | ENST00000324972 | p.G115S  | c.343G>A   | Verified   | TCA | GGC | GAT | 1 | G | A |
| TCGA-24-1435 | DYNC2LI1   | ENST00000260605 | p.K44K   | c.132G>A   | Verified   | GGA | AAG | ACT | 3 | G | A |
| TCGA-09-2050 | E2F2       | ENST00000361729 | p.V175M  | c.523G>A   | Verified   | aac | gtg | ctg | 1 | G | A |
| TCGA-20-1683 | E2F7       | ENST00000322886 | p.V192M  | c.574G>A   | Unverified | AAT | GTG | CTG | 1 | G | A |
| TCGA-20-1683 | E2F7_ENST0 | ENST00000322886 | p.V192M  | c.574G>A   | Unverified | AAT | GTG | CTG | 1 | G | A |
| TCGA-29-1691 | EBP        | ENST00000495186 | p.V44M   | c.130G>A   | Unverified | gtc | gtg | acc | 1 | G | A |
| TCGA-20-0990 | ECE1       | ENST00000374893 | p.R754H  | c.2261G>A  | Verified   | TTC | CGC | TGC | 2 | G | A |
| TCGA-24-1616 | ECE2       | ENST00000359140 | p.A533T  | c.1597G>A  | Verified   | AAT | GCC | TAC | 1 | G | A |
| TCGA-24-2290 | ECE2       | ENST00000359140 | p.R438Q  | c.1313G>A  | Verified   | ATC | CGG | ACC | 2 | G | A |
| TCGA-24-2290 | ECE2       | ENST00000359140 | p.R438Q  | c.1313G>A  | Verified   | ATC | CGG | ACC | 2 | G | A |
| TCGA-61-1910 | EDA        | ENST00000374552 | p.V307I  | c.919G>A   | Unverified | CAG | GTA | GAA | 1 | G | A |
| TCGA-61-1910 | EDA_ENST0C | ENST00000374552 | p.V307I  | c.919G>A   | Unverified | CAG | GTA | GAA | 1 | G | A |
| TCGA-24-2035 | EDC4       | ENST00000358933 | p.E76K   | c.226G>A   | Unverified | CAA | GAG | AAG | 1 | G | A |
| TCGA-24-2290 | EDC4       | ENST00000358933 | p.R974H  | c.2921G>A  | Verified   | CAG | CGT | CTG | 2 | G | A |

|              |            |                 |         |           |            |     |     |     |   |   |   |
|--------------|------------|-----------------|---------|-----------|------------|-----|-----|-----|---|---|---|
| TCGA-24-2290 | EDC4       | ENST00000358933 | p.R974H | c.2921G>A | Verified   | CAG | CGT | CTG | 2 | G | A |
| TCGA-09-2051 | EDEM3      | ENST00000318130 | p.A807T | c.2419G>A | Unverified | CTA | GCA | GAT | 1 | G | A |
| TCGA-29-1761 | EDNRB      | ENST00000334286 | p.V325I | c.973G>A  | Unverified | ACC | GTC | TTT | 1 | G | A |
| TCGA-29-1761 | EDNRB_ENS  | ENST00000377211 | p.V415I | c.1243G>A | Unverified | ACC | GTC | TTT | 1 | G | A |
| TCGA-24-2289 | EED        | ENST00000263360 | p.A11A  | c.33G>A   | Unverified | ccg | gcg | gga | 3 | G | A |
| TCGA-30-1718 | EEF1A1     | ENST00000316292 | p.W58*  | c.173G>A  | Unverified | gcc | tgg | gtc | 2 | G | A |
| TCGA-61-2102 | EFEMP2     | ENST00000307998 | p.S383S | c.1149G>A | Verified   | AAC | TCG | CAG | 3 | G | A |
| TCGA-29-1763 | EFHA2      | ENST00000318063 | p.G131S | c.391G>A  | Unverified | ATT | GGC | AGA | 1 | G | A |
| TCGA-10-0930 | EFHB       | ENST00000295824 | p.A162T | c.484G>A  | Verified   | CCT | GCT | TTC | 1 | G | A |
| TCGA-10-0930 | EFHB       | ENST00000295824 | p.A162T | c.484G>A  | Verified   | CCT | GCT | TTC | 1 | G | A |
| TCGA-10-0930 | EFHB_ENSTC | ENST00000295824 | p.A162T | c.484G>A  | Verified   | CCT | GCT | TTC | 1 | G | A |
| TCGA-10-0930 | EFHB_ENSTC | ENST00000295824 | p.A162T | c.484G>A  | Verified   | CCT | GCT | TTC | 1 | G | A |
| TCGA-04-1338 | EFHC2      | ENST00000333807 | p.R133H | c.398G>A  | Verified   | cgg | cgt | cat | 2 | G | A |
| TCGA-23-1114 | EFNB1      | ENST00000204961 | p.R156H | c.467G>A  | Unverified | aca | cgc | acc | 2 | G | A |
| TCGA-13-0905 | EFR3A      | ENST00000254624 | p.L782L | c.2346G>A | Verified   | ATA | TTG | GAA | 3 | G | A |
| TCGA-25-1313 | EGFL7      | ENST00000371698 | p.K270K | c.810G>A  | Verified   | TGC | AAG | AAA | 3 | G | A |
| TCGA-61-1906 | EGFLAM     | ENST00000322350 | p.G332R | c.994G>A  | Unverified | AAG | GGG | AAG | 1 | G | A |
| TCGA-61-1906 | EGFLAM     | ENST00000322350 | p.G332R | c.994G>A  | Unverified | AAG | GGG | AAG | 1 | G | A |
| TCGA-61-1906 | EGFLAM_EN  | ENST00000354891 | p.G332R | c.994G>A  | Unverified | AAG | GGG | AAG | 1 | G | A |
| TCGA-61-1906 | EGFLAM_EN  | ENST00000354891 | p.G332R | c.994G>A  | Unverified | AAG | GGG | AAG | 1 | G | A |
| TCGA-09-2050 | EGFR       | ENST00000275493 | p.G331G | c.993G>A  | Unverified | GAA | GGG | CCT | 3 | G | A |
| TCGA-09-2050 | EGFR_ENSTC | ENST00000344576 | p.G331G | c.993G>A  | Unverified | GAA | GGG | CCT | 3 | G | A |
| TCGA-09-1674 | EGLN2      | ENST00000303961 | p.V336M | c.1006G>A | Unverified | ccc | gtg | gta | 1 | G | A |
| TCGA-10-0930 | EGR1       | ENST00000239938 | p.R320H | c.959G>A  | Verified   | AGC | CGC | ATG | 2 | G | A |
| TCGA-10-0930 | EGR1       | ENST00000239938 | p.R320H | c.959G>A  | Verified   | AGC | CGC | ATG | 2 | G | A |
| TCGA-29-1762 | EHHADH     | ENST00000231887 | p.G526G | c.1578G>A | Unverified | GCT | GGG | TTG | 3 | G | A |
| TCGA-09-1674 | EIF3B      | ENST00000397011 | p.R315H | c.944G>A  | Unverified | GAC | CGC | ACT | 2 | G | A |
| TCGA-29-1763 | EIF4A3     | ENST00000269349 | p.E261K | c.781G>A  | Unverified | agg | gaa | gag | 1 | G | A |
| TCGA-61-1998 | ELMO1      | ENST00000310758 | p.A5T   | c.13G>A   | Verified   | CCC | GCG | GAC | 1 | G | A |
| TCGA-04-1336 | ELN        | ENST00000252034 | p.Q539Q | c.1617G>A | Verified   | GCC | CAG | CTC | 3 | G | A |
| TCGA-29-1763 | ELOVL7     | ENST00000508821 | p.V143V | c.429G>A  | Unverified | CAA | GTG | ACT | 3 | G | A |
| TCGA-23-1809 | ELP3       | ENST00000256398 | p.R462H | c.1385G>A | Unverified | TTC | CGT | TTC | 2 | G | A |
| TCGA-23-1809 | EMILIN1    | ENST00000380320 | p.R726Q | c.2177G>A | Unverified | GGG | CGA | TTG | 2 | G | A |
| TCGA-25-2392 | EMILIN1    | ENST00000380320 | p.G267D | c.800G>A  | Unverified | GGC | GGC | AGC | 2 | G | A |

|              |            |                 |          |           |            |     |     |     |   |   |   |
|--------------|------------|-----------------|----------|-----------|------------|-----|-----|-----|---|---|---|
| TCGA-24-1431 | EML5       | ENST00000554922 | p.E1166E | c.3498G>A | Verified   | GTG | GAG | GTA | 3 | G | A |
| TCGA-13-0807 | EMR3       | ENST00000253673 | p.D190N  | c.568G>A  | Verified   | AAC | GAT | AGT | 1 | G | A |
| TCGA-23-2077 | EMR3       | ENST00000253673 | p.G363R  | c.1087G>A | Verified   | GTG | GGG | CTG | 1 | G | A |
| TCGA-61-2094 | ENDOU      | ENST00000229003 | p.R344Q  | c.1031G>A | Unverified | GTC | CGG | ACA | 2 | G | A |
| TCGA-25-1318 | ENO3       | ENST00000323997 | p.S401S  | c.1203G>A | Verified   | CGC | TCG | GAG | 3 | G | A |
| TCGA-25-1318 | ENO3       | ENST00000323997 | p.S401S  | c.1203G>A | Verified   | CGC | TCG | GAG | 3 | G | A |
| TCGA-04-1362 | ENPP3      | ENST00000357639 | p.W250*  | c.749G>A  | Verified   | TGG | TGG | CAT | 2 | G | A |
| TCGA-61-1904 | ENSG000000 | ENST00000354191 | p.S116N  | c.347G>A  | Unverified | TGT | AGC | CCC | 2 | G | A |
| TCGA-61-1899 | ENSG000000 | ENST00000324457 | p.V132M  | c.394G>A  | Unverified | ACC | GTG | GAA | 1 | G | A |
| TCGA-13-1509 | ENSG000000 | ENST00000429274 | p.R115Q  | c.344G>A  | Verified   | ATG | CGG | GAG | 2 | G | A |
| TCGA-29-1690 | ENSG000000 | ENST00000308911 | p.S172S  | c.516G>A  | Unverified | CCC | TCG | CCC | 3 | G | A |
| TCGA-23-1114 | ENSG000000 | ENST00000356069 | p.R243H  | c.728G>A  | Unverified | ACA | CGT | TCC | 2 | G | A |
| TCGA-29-1703 | ENSG000000 | ENST00000331172 | p.A190T  | c.568G>A  | Unverified | TTT | GCT | GGT | 1 | G | A |
| TCGA-23-1809 | ENSG000000 | ENST00000543388 | p.R161H  | c.482G>A  | Unverified | CAT | CGT | TGA | 2 | G | A |
| TCGA-04-1638 | ENSG000000 | ENST00000358133 | p.T113T  | c.339G>A  | Unverified | GAC | ACG | GGA | 3 | G | A |
| TCGA-13-0791 | ENSG000000 | ENST00000430863 | p.R471H  | c.1412G>A | Verified   | AGT | CGC | CAG | 2 | G | A |
| TCGA-25-2400 | ENSG000000 | ENST00000260257 | p.E40E   | c.120G>A  | Unverified | GCC | GAG | TTG | 3 | G | A |
| TCGA-25-2392 | ENTHD1     | ENST00000325157 | p.R4K    | c.11G>A   | Verified   | TTC | AGG | AGA | 2 | G | A |
| TCGA-23-1116 | ENTHD1     | ENST00000325157 | p.A2A    | c.6G>A    | Unverified | ATG | GCG | TTC | 3 | G | A |
| TCGA-04-1343 | EOMES      | ENST00000295743 | p.G370R  | c.1108G>A | Verified   | TTC | GGG | AAA | 1 | G | A |
| TCGA-61-1737 | EOMES      | ENST00000295743 | p.G256R  | c.766G>A  | Unverified | CTG | GGG | GGC | 1 | G | A |
| TCGA-29-1703 | EPB41L3    | ENST00000341928 | p.A653T  | c.1957G>A | Unverified | TAC | GCT | CTC | 1 | G | A |
| TCGA-04-1356 | EPHA1_ENS  | ENST00000275815 | p.V567I  | c.1699G>A | Verified   | CTC | GTT | TTC | 1 | G | A |
| TCGA-29-1693 | EPHA10     | CGP_EPHA10.1    | p.A811A  | c.2433G>A | Unverified | cca | gcg | cta | 3 | G | A |
| TCGA-09-2049 | EPHA7      | NM_004440       | p.D108N  | c.322G>A  | Verified   | agg | gat | tgt | 1 | G | A |
| TCGA-61-1904 | EPHA8      | ENST00000166244 | p.V344V  | c.1032G>A | Unverified | tca | gtg | act | 3 | G | A |
| TCGA-61-1904 | EPHA8_ENS  | ENST00000374644 | p.V344V  | c.1032G>A | Unverified | TCA | GTG | ACT | 3 | G | A |
| TCGA-61-1906 | EPHB1      | ENST00000398015 | p.G81R   | c.241G>A  | Unverified | CGG | GGG | GCC | 1 | G | A |
| TCGA-61-1906 | EPHB1      | ENST00000398015 | p.G81R   | c.241G>A  | Unverified | CGG | GGG | GCC | 1 | G | A |
| TCGA-61-2008 | EPHB1      | ENST00000398015 | p.A176T  | c.526G>A  | Verified   | CTC | GCT | TTT | 1 | G | A |
| TCGA-61-1906 | EPHB1_ENS  | ENST00000398015 | p.G81R   | c.241G>A  | Unverified | CGG | GGG | GCC | 1 | G | A |
| TCGA-61-1906 | EPHB1_ENS  | ENST00000398015 | p.G81R   | c.241G>A  | Unverified | CGG | GGG | GCC | 1 | G | A |
| TCGA-61-2008 | EPHB1_ENS  | ENST00000398015 | p.A176T  | c.526G>A  | Verified   | CTC | GCT | TTT | 1 | G | A |
| TCGA-23-1122 | EPHX1      | ENST00000366837 | p.G344S  | c.1030G>A | Verified   | GGA | GGC | CTG | 1 | G | A |

|              |            |                 |          |            |            |     |     |     |   |   |   |
|--------------|------------|-----------------|----------|------------|------------|-----|-----|-----|---|---|---|
| TCGA-61-1998 | EPN3       | ENST00000268933 | p.P330P  | c.990G>A   | Verified   | AGG | CCG | AAC | 3 | G | A |
| TCGA-29-1705 | EPPK1      | ENST00000525985 | p.R1409Q | c.4226G>A  | Unverified | GCG | CGG | GAC | 2 | G | A |
| TCGA-24-0975 | EPPK1      | ENST00000525985 | p.V2231V | c.6693G>A  | Unverified | CTG | GTG | CCC | 3 | G | A |
| TCGA-24-1850 | EPS15L1    | ENST00000248070 | p.P28P   | c.84G>A    | Unverified | GAT | CCG | GCA | 3 | G | A |
| TCGA-13-0795 | ERAP1      | ENST00000296754 | p.V647I  | c.1939G>A  | Verified   | CTC | GTC | AGC | 1 | G | A |
| TCGA-09-1665 | ERBB2      | ENST00000269571 | p.R896H  | c.2687G>A  | Unverified | CTC | CGC | CGG | 2 | G | A |
| TCGA-09-1665 | ERBB2IP    | NM_018695.1     | p.V594I  | c.1780G>A  | Verified   | gat | ggt | ttt | 1 | G | A |
| TCGA-29-1764 | ERBB3      | ENST00000267101 | p.E1219K | c.3655G>A  | Unverified | GAG | GAG | CTG | 1 | G | A |
| TCGA-13-1489 | ERBB3_ENST | ENST00000267101 | p.V438I  | c.1312G>A  | Verified   | AAT | GTC | ACA | 1 | G | A |
| TCGA-29-1764 | ERBB3_ENST | ENST00000267101 | p.E1219K | c.3655G>A  | Unverified | GAG | GAG | CTG | 1 | G | A |
| TCGA-29-1698 | ERCC6      | ENST00000355832 | p.W581*  | c.1742G>A  | Unverified | CAG | TGG | GTG | 2 | G | A |
| TCGA-24-1849 | ERGIC1     | ENST00000393784 | p.D59N   | c.175G>A   | Unverified | GTC | GAT | GAC | 1 | G | A |
| TCGA-25-2392 | ERLEC1     | ENST00000185150 | p.E302E  | c.906G>A   | Verified   | GAA | GAG | AGA | 3 | G | A |
| TCGA-13-0885 | ERLEC1     | ENST00000185150 | p.?      | c.750-1G>A | Verified   | TAT | AGG | TTC | 3 | G | A |
| TCGA-24-1849 | ESPL1      | ENST00000257934 | p.L905L  | c.2715G>A  | Unverified | GTC | CTG | CAG | 3 | G | A |
| TCGA-25-1326 | ESYT1      | ENST00000394048 | p.K671K  | c.2013G>A  | Verified   | GTG | AAG | GGC | 3 | G | A |
| TCGA-09-0369 | ETNK2      | ENST00000367201 | p.A187T  | c.559G>A   | Verified   | CAC | GCC | AAC | 1 | G | A |
| TCGA-09-0369 | ETNK2      | ENST00000367201 | p.A187T  | c.559G>A   | Verified   | CAC | GCC | AAC | 1 | G | A |
| TCGA-20-1685 | ETNK2      | ENST00000367201 | p.V291M  | c.871G>A   | Unverified | GGC | GTG | AAT | 1 | G | A |
| TCGA-20-1685 | ETNK2_ENST | ENST00000367202 | p.V291M  | c.871G>A   | Unverified | GGC | GTG | AAT | 1 | G | A |
| TCGA-30-1856 | ETV1       | ENST00000430479 | p.V476M  | c.1426G>A  | Unverified | tac | gtg | tat | 1 | G | A |
| TCGA-30-1856 | ETV1_ENSTC | ENST00000403527 | p.V436M  | c.1306G>A  | Unverified | TAC | GTG | TAT | 1 | G | A |
| TCGA-04-1651 | EWSR1      | ENST00000397938 | p.D359N  | c.1075G>A  | Unverified | TCT | GAC | AAC | 1 | G | A |
| TCGA-04-1651 | EWSR1      | ENST00000397938 | p.D359N  | c.1075G>A  | Unverified | TCT | GAC | AAC | 1 | G | A |
| TCGA-29-1705 | EXOC4      | ENST00000253861 | p.V974I  | c.2920G>A  | Unverified | ACC | GTT | TAG | 1 | G | A |
| TCGA-13-1489 | EXOC4      | ENST00000253861 | p.S579N  | c.1736G>A  | Verified   | CAG | AGC | ACA | 2 | G | A |
| TCGA-29-1691 | EXOSC10    | ENST00000376936 | p.K803K  | c.2409G>A  | Unverified | TCC | AAG | AAG | 3 | G | A |
| TCGA-20-0991 | EXT1       | ENST00000378204 | p.A151A  | c.453G>A   | Verified   | cag | gcg | tgk | 3 | G | A |
| TCGA-13-0760 | EXT1       | ENST00000378204 | p.T568T  | c.1704G>A  | Verified   | gac | acg | gtg | 3 | G | A |
| TCGA-29-1775 | EXTL3      | ENST00000220562 | p.G176S  | c.526G>A   | Unverified | CGG | GGC | TGC | 1 | G | A |
| TCGA-13-0883 | EYA1       | ENST00000388742 | p.G39D   | c.116G>A   | Verified   | aat | ggc | acc | 2 | G | A |
| TCGA-24-1469 | EZH1       | ENST00000428826 | p.E721K  | c.2161G>A  | Verified   | ggc | gaa | gag | 1 | G | A |
| TCGA-09-1674 | F11        | ENST00000403665 | p.G342E  | c.1025G>A  | Unverified | GAA | GGG | AAG | 2 | G | A |
| TCGA-61-1899 | F2R        | ENST00000319211 | p.V178I  | c.532G>A   | Unverified | TTC | GTC | ACT | 1 | G | A |



|              |            |                     |          |           |            |     |     |     |   |   |   |
|--------------|------------|---------------------|----------|-----------|------------|-----|-----|-----|---|---|---|
| TCGA-29-1761 | F8         | ENST00000360256     | p.A1741T | c.5221G>A | Unverified | AGG | GCT | CAG | 1 | G | A |
| TCGA-29-1761 | F8_ENST000 | ENST00000360256     | p.A1741T | c.5221G>A | Unverified | AGG | GCT | CAG | 1 | G | A |
| TCGA-24-1843 | FAM102B_E  | ENST00000370035     | p.A322A  | c.966G>A  | Unverified | AGT | GCG | GAA | 3 | G | A |
| TCGA-04-1542 | FAM105A    | ENST00000274217     | p.D293N  | c.877G>A  | Verified   | GGC | GAC | ACA | 1 | G | A |
| TCGA-13-0885 | FAM111B    | ENST00000343597     | p.S331N  | c.992G>A  | Verified   | CTA | AGC | CAT | 2 | G | A |
| TCGA-25-1313 | FAM111B    | ENST00000343597     | p.W562*  | c.1685G>A | Verified   | CTA | TGG | CGA | 2 | G | A |
| TCGA-04-1649 | FAM115A    | ENST00000355951     | p.A829T  | c.2485G>A | Unverified | ACC | GCA | CTG | 1 | G | A |
| TCGA-61-1733 | FAM126A    | ENST00000432176     | p.P466P  | c.1398G>A | Unverified | AAC | CCG | TCA | 3 | G | A |
| TCGA-61-1733 | FAM126A    | ENST00000432176     | p.P466P  | c.1398G>A | Unverified | AAC | CCG | TCA | 3 | G | A |
| TCGA-61-1904 | FAM131B    | ENST00000409346     | p.G119S  | c.355G>A  | Unverified | GAT | GGC | GAG | 1 | G | A |
| TCGA-25-2042 | FAM131B    | ENST00000409346     | p.G92E   | c.275G>A  | Unverified | TGG | GGG | AAG | 2 | G | A |
| TCGA-61-1904 | FAM131B_E  | ENST00000443739     | p.G147S  | c.439G>A  | Unverified | GAT | GGC | GAG | 1 | G | A |
| TCGA-25-2042 | FAM131B_E  | ENST00000443739     | p.G120E  | c.359G>A  | Unverified | TGG | GGG | AAG | 2 | G | A |
| TCGA-24-0979 | FAM134C    | ENST00000309428     | p.D213N  | c.637G>A  | Verified   | TGG | GAT | CGA | 1 | G | A |
| TCGA-29-1703 | FAM135A    | ENST00000370479     | p.V1025I | c.3073G>A | Unverified | AGT | GTA | GAA | 1 | G | A |
| TCGA-61-1910 | FAM135A    | ENST00000370479     | p.R250Q  | c.749G>A  | Unverified | CTA | CGA | ACA | 2 | G | A |
| TCGA-29-1703 | FAM135A_E  | ENST00000418814     | p.V1238I | c.3712G>A | Unverified | AGT | GTA | GAA | 1 | G | A |
| TCGA-13-0762 | FAM13A     | ENST00000264344     | p.R648Q  | c.1943G>A | Verified   | AGG | CGG | CGA | 2 | G | A |
| TCGA-13-0762 | FAM13A     | ENST00000264344     | p.R648Q  | c.1943G>A | Verified   | AGG | CGG | CGA | 2 | G | A |
| TCGA-61-1910 | FAM13A     | ENST00000264344     | p.M646I  | c.1938G>A | Unverified | TTC | ATG | AGG | 3 | G | A |
| TCGA-61-1910 | FAM13A_EN  | ENST00000508369     | p.M320I  | c.960G>A  | Unverified | TTC | ATG | AGG | 3 | G | A |
| TCGA-24-2267 | FAM13C     | ENST00000373868     | p.R144Q  | c.431G>A  | Verified   | GTG | CGA | CTT | 2 | G | A |
| TCGA-29-1702 | FAM149A    | ENST00000503432     | p.T362T  | c.1086G>A | Unverified | caa | acg | tca | 3 | G | A |
| TCGA-23-1111 | FAM155B    | ENST00000252338     | p.E305K  | c.913G>A  | Unverified | cag | gaa | tgc | 1 | G | A |
| TCGA-24-1470 | FAM171B    | ENST00000304698     | p.E787K  | c.2359G>A | Verified   | GTT | GAA | GAT | 1 | G | A |
| TCGA-61-1738 | FAM171B    | ENST00000304698     | p.T110T  | c.330G>A  | Unverified | TAC | ACG | AAG | 3 | G | A |
| TCGA-61-1738 | FAM171B    | ENST00000304698     | p.T110T  | c.330G>A  | Unverified | TAC | ACG | AAG | 3 | G | A |
| TCGA-24-1845 | FAM183B    | ENST00000409072     | p.E22K   | c.64G>A   | Unverified | CGG | GAG | CTG | 1 | G | A |
| TCGA-24-1845 | FAM183B_E  | ENST00000409072_v68 | p.E22K   | c.64G>A   | Unverified | CGG | GAG | CTG | 1 | G | A |
| TCGA-13-0793 | FAM188A    | ENST00000277632     | p.L208L  | c.624G>A  | Verified   | ccc | ttg | ata | 3 | G | A |
| TCGA-61-1725 | FAM18B1    | ENST00000307767     | p.M159I  | c.477G>A  | Unverified | ATC | ATG | GGT | 3 | G | A |
| TCGA-25-2400 | FAM193A    | ENST00000382839     | p.R126H  | c.377G>A  | Unverified | CTG | CGC | AGA | 2 | G | A |
| TCGA-24-1474 | FAM200A    | ENST00000449309     | p.R245Q  | c.734G>A  | Unverified | CAT | CGA | GAA | 2 | G | A |
| TCGA-13-1501 | FAM20B     | ENST00000263733     | p.D37N   | c.109G>A  | Verified   | GAG | GAC | CAG | 1 | G | A |

|              |         |                 |          |           |            |     |     |     |   |   |   |
|--------------|---------|-----------------|----------|-----------|------------|-----|-----|-----|---|---|---|
| TCGA-13-1501 | FAM20B  | ENST00000263733 | p.D37N   | c.109G>A  | Verified   | GAG | GAC | CAG | 1 | G | A |
| TCGA-30-1855 | FAM21A  | ENST00000282633 | p.K1326K | c.3978G>A | Unverified | CAC | AAG | GTG | 3 | G | A |
| TCGA-24-1849 | FAM39B  | ENST00000359512 | p.R433H  | c.1298G>A | Unverified | AGG | CGC | AAG | 2 | G | A |
| TCGA-23-2078 | FAM45A  | ENST00000361432 | p.C230Y  | c.689G>A  | Unverified | ATG | TGC | ACA | 2 | G | A |
| TCGA-24-2290 | FAM47A  | ENST00000346193 | p.S683S  | c.2049G>A | Verified   | cca | tcg | aat | 3 | G | A |
| TCGA-24-2290 | FAM47A  | ENST00000346193 | p.S683S  | c.2049G>A | Verified   | cca | tcg | aat | 3 | G | A |
| TCGA-61-2113 | FAM47A  | ENST00000346193 | p.P225P  | c.675G>A  | Verified   | cgc | ccg | gag | 3 | G | A |
| TCGA-24-1847 | FAM47A  | ENST00000346193 | p.P532P  | c.1596G>A | Unverified | ggt | ccg | gag | 3 | G | A |
| TCGA-13-0905 | FAM47B  | ENST00000329357 | p.R291H  | c.872G>A  | Verified   | ACT | CGC | GTA | 2 | G | A |
| TCGA-04-1331 | FAM47C  | ENST00000358047 | p.G820R  | c.2458G>A | Verified   | acc | gga | gcg | 1 | G | A |
| TCGA-61-2094 | FAM47C  | ENST00000358047 | p.P728P  | c.2184G>A | Unverified | tgc | ccg | gag | 3 | G | A |
| TCGA-10-0930 | FAM50A  | ENST00000393600 | p.M144I  | c.432G>A  | Verified   | gag | atg | gaa | 3 | G | A |
| TCGA-10-0930 | FAM50A  | ENST00000393600 | p.M144I  | c.432G>A  | Verified   | gag | atg | gaa | 3 | G | A |
| TCGA-24-0975 | FAM53C  | ENST00000239906 | p.V352M  | c.1054G>A | Unverified | CAG | GTG | CTG | 1 | G | A |
| TCGA-23-1123 | FAM55B  | ENST00000389586 | p.S197N  | c.590G>A  | Verified   | CCC | AGT | GAA | 2 | G | A |
| TCGA-23-1123 | FAM55B  | ENST00000389586 | p.S197N  | c.590G>A  | Verified   | CCC | AGT | GAA | 2 | G | A |
| TCGA-13-0760 | FAM5B   | ENST00000361539 | p.V756M  | c.2266G>A | Verified   | GAG | GTG | GGC | 1 | G | A |
| TCGA-24-1470 | FAM5C   | ENST00000367462 | p.V207I  | c.619G>A  | Verified   | aag | gta | aca | 1 | G | A |
| TCGA-61-1737 | FAM5C   | ENST00000367462 | p.E496K  | c.1486G>A | Unverified | ctc | gag | atg | 1 | G | A |
| TCGA-24-2267 | FAM63B  | ENST00000559228 | p.G239E  | c.716G>A  | Unverified | CCG | GGA | CAA | 2 | G | A |
| TCGA-30-1714 | FAM71A  | ENST00000294829 | p.P44P   | c.132G>A  | Unverified | GCA | CCG | ATA | 3 | G | A |
| TCGA-13-0755 | FAM75A3 | ENST00000356699 | p.R684K  | c.2051G>A | Verified   | TCC | AGG | GAT | 2 | G | A |
| TCGA-24-1616 | FAM75D4 | ENST00000344803 | p.R1406R | c.4218G>A | Verified   | ATT | AGG | AAA | 3 | G | A |
| TCGA-13-0762 | FAM78A  | ENST00000372271 | p.V166I  | c.496G>A  | Verified   | AGC | GTC | ACA | 1 | G | A |
| TCGA-13-0762 | FAM78A  | ENST00000372271 | p.V166I  | c.496G>A  | Verified   | AGC | GTC | ACA | 1 | G | A |
| TCGA-09-1674 | FAM78B  | ENST00000354422 | p.V136I  | c.406G>A  | Unverified | TCC | GTC | AGC | 1 | G | A |
| TCGA-04-1338 | FAM82B  | ENST00000406452 | p.K165K  | c.495G>A  | Verified   | CAT | AAG | TGG | 3 | G | A |
| TCGA-24-1850 | FAM86A  | ENST00000427587 | p.R285H  | c.854G>A  | Unverified | GTC | CGC | AAC | 2 | G | A |
| TCGA-13-0923 | FANCI   | ENST00000300027 | p.R959Q  | c.2876G>A | Verified   | AGC | CGG | GAG | 2 | G | A |
| TCGA-61-1900 | FASN    | ENST00000306749 | p.P1779P | c.5337G>A | Unverified | CAC | CCG | CTC | 3 | G | A |
| TCGA-24-1469 | FASTKD1 | ENST00000453153 | p.E709K  | c.2125G>A | Verified   | GCA | GAG | GTA | 1 | G | A |
| TCGA-04-1367 | FASTKD1 | ENST00000453153 | p.S720S  | c.2160G>A | Verified   | GCC | TCG | GTT | 3 | G | A |
| TCGA-24-1422 | FASTKD2 | ENST00000236980 | p.M348I  | c.1044G>A | Unverified | CAC | ATG | TTT | 3 | G | A |
| TCGA-13-0791 | FAT1    | ENST00000441802 | p.V1373I | c.4117G>A | Verified   | CCC | GTT | GCT | 1 | G | A |

|              |            |                     |          |            |            |     |     |     |   |   |   |
|--------------|------------|---------------------|----------|------------|------------|-----|-----|-----|---|---|---|
| TCGA-23-1022 | FAT1       | ENST00000441802     | p.R2354R | c.7062G>A  | Verified   | TCC | CGG | CAG | 3 | G | A |
| TCGA-13-0795 | FAT3       | ENST00000298047     | p.A581T  | c.1741G>A  | Verified   | AAA | GTG | GCT | 1 | G | A |
| TCGA-13-0913 | FAT3_ENSTC | ENST00000298047_v61 | p.D573N  | c.1717G>A  | Unverified | AAC | GAC | AAC | 1 | G | A |
| TCGA-23-2077 | FAT3_ENSTC | ENST00000298047_v61 | p.R3941H | c.11822G>A | Verified   | CGG | CGC | CGG | 2 | G | A |
| TCGA-13-0913 | FAT3_ENSTC | ENST00000409404     | p.D573N  | c.1717G>A  | Unverified | AAC | GAC | AAC | 1 | G | A |
| TCGA-23-2077 | FAT3_ENSTC | ENST00000409404     | p.R3941H | c.11822G>A | Verified   | CGG | CGC | CGG | 2 | G | A |
| TCGA-24-1469 | FAT4       | ENST00000330166     | p.D1868N | c.5602G>A  | Verified   | GAT | GAT | GAC | 1 | G | A |
| TCGA-24-1469 | FAT4_ENSTC | ENST00000394329     | p.D1868N | c.5602G>A  | Verified   | GAT | GAT | GAC | 1 | G | A |
| TCGA-13-0755 | FBLN1      | ENST00000327858     | p.C50Y   | c.149G>A   | Verified   | GAC | TGC | TCG | 2 | G | A |
| TCGA-23-1029 | FBLN5      | ENST00000342058     | p.R331H  | c.992G>A   | Unverified | AAC | CGC | TGT | 2 | G | A |
| TCGA-20-0990 | FBN2       | ENST00000262464     | p.G2185D | c.6554G>A  | Verified   | AAT | GGT | CAA | 2 | G | A |
| TCGA-13-0885 | FBN2       | ENST00000262464     | p.M1315I | c.3945G>A  | Verified   | TTC | ATG | GCT | 3 | G | A |
| TCGA-13-0755 | FBXL14     | ENST00000339235     | p.T334T  | c.1002G>A  | Verified   | CGC | ACG | CTC | 3 | G | A |
| TCGA-61-1725 | FBXO24     | ENST00000241071     | p.V250M  | c.748G>A   | Unverified | atc | gtg | ctg | 1 | G | A |
| TCGA-61-1725 | FBXO24_EN' | ENST00000427939     | p.V288M  | c.862G>A   | Unverified | ATC | GTG | CTG | 1 | G | A |
| TCGA-13-0919 | FBXO30     | ENST00000237281     | p.R654H  | c.1961G>A  | Verified   | tct | cgt | ggc | 2 | G | A |
| TCGA-13-1488 | FBXO38     | ENST00000340253     | p.D1127N | c.3379G>A  | Verified   | gac | gat | gaa | 1 | G | A |
| TCGA-23-2078 | FBXO38     | ENST00000340253     | p.D1126N | c.3376G>A  | Unverified | gaa | gac | gat | 1 | G | A |
| TCGA-24-1474 | FBXO44     | ENST00000376770     | p.D102N  | c.304G>A   | Verified   | ggc | gat | gag | 1 | G | A |
| TCGA-04-1337 | FBXW7      | ENST00000281708     | p.R465H  | c.1394G>A  | Unverified | GTG | CGT | TGT | 2 | G | A |
| TCGA-04-1337 | FBXW7_ENS  | ENST00000281708     | p.R465H  | c.1394G>A  | Unverified | GTG | CGT | TGT | 2 | G | A |
| TCGA-04-1337 | FBXW7_ENS  | ENST00000534231     | p.R226H  | c.677G>A   | Unverified | GTG | CGT | TGT | 2 | G | A |
| TCGA-04-1337 | FBXW7_NM   | ENST00000263981     | p.R385H  | c.1154G>A  | Unverified | gtg | cgt | tgt | 2 | G | A |
| TCGA-04-1336 | FCGBP      | ENST00000221347     | p.V5330M | c.15988G>A | Verified   | TCC | GTG | AGT | 1 | G | A |
| TCGA-25-2393 | FCGBP      | ENST00000221347     | p.V4311I | c.12931G>A | Verified   | GAC | GTC | TGC | 1 | G | A |
| TCGA-29-1766 | FCGBP      | ENST00000221347     | p.D4269N | c.12805G>A | Unverified | GAG | GAC | CGG | 1 | G | A |
| TCGA-13-0923 | FCGR2A     | ENST00000367972     | p.A224A  | c.672G>A   | Verified   | ATT | GCG | ACT | 3 | G | A |
| TCGA-13-1498 | FCHSD2     | NM_014824.1         | p.T493T  | c.1479G>A  | Verified   | cac | acg | tcc | 3 | G | A |
| TCGA-13-0919 | FCRL1      | ENST00000368176     | p.A166T  | c.496G>A   | Verified   | ACA | GCA | GAG | 1 | G | A |
| TCGA-23-1809 | FCRL4      | ENST00000271532     | p.R97H   | c.290G>A   | Unverified | GTG | CGC | TTG | 2 | G | A |
| TCGA-25-2400 | FDXACB1    | ENST00000428306     | p.L24L   | c.72G>A    | Unverified | ACC | CTG | GAT | 3 | G | A |
| TCGA-25-2391 | FER1L5     | ENST00000505256     | p.S1958S | c.5874G>A  | Unverified | CAG | TCG | GAA | 3 | G | A |
| TCGA-24-2262 | FER1L6     | ENST00000399018     | p.R1751H | c.5252G>A  | Verified   | GTG | CGT | GGC | 2 | G | A |
| TCGA-24-1103 | FER1L6     | ENST00000399018     | p.R1591R | c.4773G>A  | Verified   | CCA | AGG | CGA | 3 | G | A |

|              |             |                 |          |           |            |     |     |     |   |   |   |
|--------------|-------------|-----------------|----------|-----------|------------|-----|-----|-----|---|---|---|
| TCGA-04-1342 | FEZF1       | ENST00000442488 | p.T311T  | c.933G>A  | Verified   | CAC | ACG | CAG | 3 | G | A |
| TCGA-13-0913 | FGD1        | ENST00000375135 | p.D617N  | c.1849G>A | Verified   | aac | gac | cgc | 1 | G | A |
| TCGA-23-1809 | FGD1        | ENST00000375135 | p.R866H  | c.2597G>A | Unverified | cag | cgc | agc | 2 | G | A |
| TCGA-04-1338 | FGD3        | NM_033086.1     | p.Q163Q  | c.489G>A  | Verified   | gcc | cag | gag | 3 | G | A |
| TCGA-24-1470 | FGF23       | ENST00000237837 | p.A197T  | c.589G>A  | Verified   | cgg | gcc | cgg | 1 | G | A |
| TCGA-25-2392 | FGFR4       | ENST00000292410 | p.R610H  | c.1829G>A | Unverified | GGC | CGC | CTG | 2 | G | A |
| TCGA-25-2392 | FGFR4_ENST  | ENST00000292408 | p.R650H  | c.1949G>A | Unverified | GGC | CGC | CTG | 2 | G | A |
| TCGA-30-1718 | FGR         | ENST00000374005 | p.R314Q  | c.941G>A  | Unverified | ctg | cgg | cac | 2 | G | A |
| TCGA-29-1770 | FILIP1L     | ENST00000331335 | p.R321H  | c.962G>A  | Unverified | AAT | CGC | CAG | 2 | G | A |
| TCGA-29-1770 | FILIP1L_ENS | ENST00000354552 | p.R321H  | c.962G>A  | Unverified | AAT | CGC | CAG | 2 | G | A |
| TCGA-04-1530 | FKBP9       | ENST00000242209 | p.R219H  | c.656G>A  | Verified   | aag | cgc | atc | 2 | G | A |
| TCGA-23-1809 | FLCN        | ENST00000285071 | p.V207M  | c.619G>A  | Unverified | aag | gtg | ttt | 1 | G | A |
| TCGA-23-1809 | FLCN_ENSTC  | ENST00000389169 | p.V207M  | c.619G>A  | Unverified | AAG | GTG | TTT | 1 | G | A |
| TCGA-29-1691 | FLG         | ENST00000368799 | p.A1206T | c.3616G>A | Unverified | GAT | GCC | TCC | 1 | G | A |
| TCGA-13-0924 | FLG         | ENST00000368799 | p.R2018K | c.6053G>A | Verified   | TCC | AGA | CAC | 2 | G | A |
| TCGA-23-2078 | FLG         | ENST00000368799 | p.S2897N | c.8690G>A | Unverified | GAC | AGT | GAG | 2 | G | A |
| TCGA-24-1844 | FLG         | ENST00000368799 | p.R1036H | c.3107G>A | Unverified | TCC | CGC | CAC | 2 | G | A |
| TCGA-61-1733 | FLG         | ENST00000368799 | p.G994D  | c.2981G>A | Unverified | GCC | GGT | CAC | 2 | G | A |
| TCGA-61-1733 | FLG         | ENST00000368799 | p.G994D  | c.2981G>A | Unverified | GCC | GGT | CAC | 2 | G | A |
| TCGA-29-1696 | FLG2        | ENST00000388718 | p.G1513D | c.4538G>A | Unverified | GGG | GGC | TCG | 2 | G | A |
| TCGA-29-1696 | FLG2        | ENST00000388718 | p.G1513D | c.4538G>A | Unverified | GGG | GGC | TCG | 2 | G | A |
| TCGA-29-1761 | FLG2        | ENST00000388718 | p.G736E  | c.2207G>A | Unverified | CAT | GGA | TCA | 2 | G | A |
| TCGA-04-1336 | FLI1        | ENST00000429175 | p.L283L  | c.849G>A  | Verified   | cag | ctg | tgg | 3 | G | A |
| TCGA-29-1699 | FLJ35880    | ENST00000312481 | p.D229N  | c.685G>A  | Unverified | AAT | GAT | GGT | 1 | G | A |
| TCGA-24-1423 | FLJ35880    | ENST00000312481 | p.K191K  | c.573G>A  | Verified   | GCG | AAG | TTC | 3 | G | A |
| TCGA-13-1498 | FLRT2       | ENST00000330753 | p.Q382Q  | c.1146G>A | Verified   | ACT | CAG | CCT | 3 | G | A |
| TCGA-61-1737 | FLT4_ENST0  | ENST00000261937 | p.S1344N | c.4031G>A | Unverified | CCA | AGC | GAG | 2 | G | A |
| TCGA-04-1530 | FMN1        | ENST00000414268 | p.G1336R | c.4006G>A | Unverified | TTT | GGG | ATG | 1 | G | A |
| TCGA-09-1674 | FMN2        | ENST00000319653 | p.S735S  | c.2205G>A | Unverified | GCT | TCG | TTT | 3 | G | A |
| TCGA-61-2113 | FMO5        | ENST00000254090 | p.D287N  | c.859G>A  | Verified   | AAT | GAT | GAC | 1 | G | A |
| TCGA-13-1505 | FMR1        | ENST00000370475 | p.R442Q  | c.1325G>A | Verified   | ttg | cga | cag | 2 | G | A |
| TCGA-13-0791 | FNDC1       | ENST00000297267 | p.A664T  | c.1990G>A | Verified   | TTC | GCC | CAG | 1 | G | A |
| TCGA-13-1497 | FNDC1       | ENST00000297267 | p.T1569T | c.4707G>A | Verified   | GAG | ACG | TCA | 3 | G | A |
| TCGA-25-1326 | FNIP1       | ENST00000510461 | p.R13K   | c.38G>A   | Unverified | AAG | AGG | ACC | 2 | G | A |

|              |            |                 |          |           |            |     |     |     |   |   |   |
|--------------|------------|-----------------|----------|-----------|------------|-----|-----|-----|---|---|---|
| TCGA-13-0905 | FNTB       | ENST00000246166 | p.G369S  | c.1105G>A | Verified   | AGC | GGC | CTG | 1 | G | A |
| TCGA-24-1850 | FOLH1      | ENST00000256999 | p.R527Q  | c.1580G>A | Unverified | CAA | CGA | CTT | 2 | G | A |
| TCGA-13-0807 | FOLH1B     | ENST00000257034 | p.L154L  | c.462G>A  | Verified   | ACT | CTG | AGA | 3 | G | A |
| TCGA-10-0930 | FOLR1      | ENST00000393676 | p.E191K  | c.571G>A  | Verified   | AAT | GAA | ATC | 1 | G | A |
| TCGA-10-0930 | FOLR1      | ENST00000393676 | p.E191K  | c.571G>A  | Verified   | AAT | GAA | ATC | 1 | G | A |
| TCGA-29-1784 | FOLR1      | ENST00000393676 | p.A64T   | c.190G>A  | Unverified | AAT | GCC | TGC | 1 | G | A |
| TCGA-23-1021 | FOSL2      | ENST00000264716 | p.E150K  | c.448G>A  | Verified   | ACA | GAG | AAG | 1 | G | A |
| TCGA-24-1103 | FOXJ2      | ENST00000162391 | p.G279R  | c.835G>A  | Verified   | ctg | ggg | gac | 1 | G | A |
| TCGA-25-2392 | FOXJ3      | ENST00000372573 | p.L202L  | c.606G>A  | Verified   | act | ctg | gca | 3 | G | A |
| TCGA-09-1665 | FOXP2      | ENST00000408937 | p.S660N  | c.1979G>A | Verified   | TCC | AGT | GGC | 2 | G | A |
| TCGA-04-1530 | FOXP3      | ENST00000376207 | p.V120V  | c.360G>A  | Unverified | cag | gtg | cac | 3 | G | A |
| TCGA-29-1711 | FPR3       | ENST00000339223 | p.E311K  | c.931G>A  | Unverified | CAA | GAA | AGA | 1 | G | A |
| TCGA-29-1711 | FPR3       | ENST00000339223 | p.E311K  | c.931G>A  | Unverified | CAA | GAA | AGA | 1 | G | A |
| TCGA-61-2012 | FRAS1_ENST | ENST00000264895 | p.G2391S | c.7171G>A | Verified   | GAC | GGC | AGT | 1 | G | A |
| TCGA-24-1469 | FRAS1_ENST | ENST00000325942 | p.D44N   | c.130G>A  | Verified   | CCC | GAT | TCA | 1 | G | A |
| TCGA-13-1497 | FRAS1_ENST | ENST00000325942 | p.Q1639Q | c.4917G>A | Verified   | CCA | CAG | CAT | 3 | G | A |
| TCGA-61-1899 | FREM1      | ENST00000422223 | p.V1719M | c.5155G>A | Unverified | ACC | GTG | GAA | 1 | G | A |
| TCGA-13-0893 | FREM2      | ENST00000280481 | p.V968I  | c.2902G>A | Verified   | AAT | GTT | ATT | 1 | G | A |
| TCGA-25-2042 | FREM2      | ENST00000280481 | p.V484M  | c.1450G>A | Verified   | GTG | GTG | GCT | 1 | G | A |
| TCGA-13-0916 | FRMD5      | ENST00000417257 | p.M509I  | c.1527G>A | Verified   | ACC | ATG | GGA | 3 | G | A |
| TCGA-10-0930 | FRMPD3     | XM_042978.4     | p.V67I   | c.199G>A  | Verified   | acc | gtt | cac | 1 | G | A |
| TCGA-10-0930 | FRMPD3     | XM_042978.4     | p.V67I   | c.199G>A  | Verified   | acc | gtt | cac | 1 | G | A |
| TCGA-29-1763 | FSD1       | ENST00000221856 | p.V288M  | c.862G>A  | Unverified | TCC | GTG | GAG | 1 | G | A |
| TCGA-61-1738 | FTSJ3      | ENST00000582115 | p.V801I  | c.2401G>A | Unverified | TAC | GTT | GTA | 1 | G | A |
| TCGA-61-1738 | FTSJ3      | ENST00000582115 | p.V801I  | c.2401G>A | Unverified | TAC | GTT | GTA | 1 | G | A |
| TCGA-36-1577 | FURIN      | ENST00000268171 | p.G653E  | c.1958G>A | Unverified | cag | ggg | ccg | 2 | G | A |
| TCGA-24-1845 | FXR2       | ENST00000250113 | p.V94V   | c.282G>A  | Unverified | CGG | GTG | CGG | 3 | G | A |
| TCGA-13-0887 | FZD2       | ENST00000315323 | p.S515S  | c.1545G>A | Verified   | atg | tcg | ccc | 3 | G | A |
| TCGA-25-1313 | G2E3       | ENST00000206595 | p.D535N  | c.1603G>A | Verified   | agt | gat | aaa | 1 | G | A |
| TCGA-13-0920 | G6PC       | ENST00000253801 | p.V304I  | c.910G>A  | Verified   | CTC | GTC | CTC | 1 | G | A |
| TCGA-23-2078 | G6PC3      | ENST00000269097 | p.L185L  | c.555G>A  | Unverified | TGG | CTG | ATG | 3 | G | A |
| TCGA-20-1686 | G6PD       | ENST00000291567 | p.M405I  | c.1215G>A | Unverified | ATG | ATG | ACC | 3 | G | A |
| TCGA-20-1686 | G6PD_ENST  | ENST00000393562 | p.M435I  | c.1305G>A | Unverified | ATG | ATG | ACC | 3 | G | A |
| TCGA-24-1435 | GAB2       | ENST00000361507 | p.D520N  | c.1558G>A | Verified   | cct | gat | cgg | 1 | G | A |

|              |           |                 |         |           |            |     |     |     |   |   |   |
|--------------|-----------|-----------------|---------|-----------|------------|-----|-----|-----|---|---|---|
| TCGA-13-1505 | GAB3      | ENST00000369575 | p.R27H  | c.80G>A   | Verified   | tgg | cgc | aag | 2 | G | A |
| TCGA-13-0919 | GABRA1    | ENST00000393943 | p.R94H  | c.281G>A  | Verified   | TTC | CGT | CAA | 2 | G | A |
| TCGA-13-1497 | GABRA3    | ENST00000370314 | p.A420T | c.1258G>A | Verified   | ggc | gct | gct | 1 | G | A |
| TCGA-30-1718 | GABRA3    | ENST00000370314 | p.V399M | c.1195G>A | Unverified | atc | gtg | ggg | 1 | G | A |
| TCGA-20-1685 | GABRB3    | ENST00000311550 | p.S371S | c.1113G>A | Unverified | ACA | TCG | CTG | 3 | G | A |
| TCGA-20-1685 | GABRB3_EN | ENST00000299267 | p.S371S | c.1113G>A | Unverified | ACA | TCG | CTG | 3 | G | A |
| TCGA-20-1685 | GABRB3_EN | ENST00000541819 | p.S427S | c.1281G>A | Unverified | ACA | TCG | CTG | 3 | G | A |
| TCGA-24-1474 | GABRE     | NM_021990       | p.R215H | c.644G>A  | Verified   | tct | cgt | aag | 2 | G | A |
| TCGA-09-2056 | GAL3ST4   | ENST00000360039 | p.A162A | c.486G>A  | Verified   | CCA | GCG | GCT | 3 | G | A |
| TCGA-23-1118 | GALNT1    | ENST00000269195 | p.V400I | c.1198G>A | Verified   | AGA | GTT | GGT | 1 | G | A |
| TCGA-24-1604 | GALNT1    | ENST00000269195 | p.D244N | c.730G>A  | Unverified | GAT | GAT | ACT | 1 | G | A |
| TCGA-24-2280 | GALNT1    | ENST00000269195 | p.L25L  | c.75G>A   | Unverified | CTG | CTG | CTT | 3 | G | A |
| TCGA-20-1685 | GALNT13   | ENST00000392825 | p.L222L | c.666G>A  | Unverified | TTG | CTG | GCA | 3 | G | A |
| TCGA-30-1714 | GALNT5    | ENST00000259056 | p.G146R | c.436G>A  | Unverified | gac | ggg | aga | 1 | G | A |
| TCGA-25-2400 | GALNT6    | ENST00000356317 | p.D602N | c.1804G>A | Verified   | CAG | GAC | AAA | 1 | G | A |
| TCGA-23-1117 | GALNTL5   | ENST00000392800 | p.G401S | c.1201G>A | Verified   | CCT | GGT | CTG | 1 | G | A |
| TCGA-23-1117 | GALNTL5   | ENST00000392800 | p.G401S | c.1201G>A | Verified   | CCT | GGT | CTG | 1 | G | A |
| TCGA-23-1022 | GAN       | ENST00000248272 | p.R286Q | c.857G>A  | Verified   | TCA | CGG | AAA | 2 | G | A |
| TCGA-09-1674 | GAPVD1    | ENST00000394105 | p.V535I | c.1603G>A | Unverified | GAG | GTC | CTA | 1 | G | A |
| TCGA-24-1844 | GAS2L3    | ENST00000266754 | p.D681N | c.2041G>A | Unverified | GAT | GAC | CAT | 1 | G | A |
| TCGA-23-1021 | GATA3     | ENST00000379328 | p.S175S | c.525G>A  | Verified   | ggc | tcg | gcc | 3 | G | A |
| TCGA-29-1785 | GATAD2B   | ENST00000368655 | p.M445I | c.1335G>A | Unverified | TGT | ATG | ACC | 3 | G | A |
| TCGA-29-1785 | GATAD2B   | ENST00000368655 | p.M445I | c.1335G>A | Unverified | TGT | ATG | ACC | 3 | G | A |
| TCGA-24-1616 | GCC1      | ENST00000321407 | p.R535Q | c.1604G>A | Verified   | CTG | CGG | CTC | 2 | G | A |
| TCGA-61-1910 | GCDH      | ENST00000222214 | p.A260T | c.778G>A  | Unverified | TCA | GCC | ACA | 1 | G | A |
| TCGA-61-1910 | GCDH_ENST | ENST00000457854 | p.A260T | c.778G>A  | Unverified | TCA | GCC | ACA | 1 | G | A |
| TCGA-13-0761 | GCLC      | ENST00000229416 | p.R575K | c.1724G>A | Unverified | GCC | AGA | TGG | 2 | G | A |
| TCGA-13-0761 | GCLC      | ENST00000229416 | p.R575K | c.1724G>A | Unverified | GCC | AGA | TGG | 2 | G | A |
| TCGA-25-2042 | GCM2      | ENST00000379491 | p.P433P | c.1299G>A | Verified   | CCT | CCG | GTG | 3 | G | A |
| TCGA-24-2288 | GDF11     | ENST00000257868 | p.K90K  | c.270G>A  | Unverified | ctc | aag | gag | 3 | G | A |
| TCGA-30-1857 | GDF5      | ENST00000374369 | p.E371E | c.1113G>A | Unverified | tat | gag | tac | 3 | G | A |
| TCGA-23-1029 | GDNF      | ENST00000326524 | p.M83I  | c.249G>A  | Unverified | CAA | ATG | GCA | 3 | G | A |
| TCGA-23-1029 | GDNF_ENST | ENST00000427982 | p.M100I | c.300G>A  | Unverified | CAA | ATG | GCA | 3 | G | A |
| TCGA-29-2427 | GFI1      | ENST00000294702 | p.R82Q  | c.245G>A  | Unverified | GAA | CGG | AGC | 2 | G | A |

|              |            |                 |          |           |            |     |     |     |   |   |   |
|--------------|------------|-----------------|----------|-----------|------------|-----|-----|-----|---|---|---|
| TCGA-25-2400 | GFOD1      | ENST00000379287 | p.E136K  | c.406G>A  | Verified   | ATC | GAG | GAG | 1 | G | A |
| TCGA-61-1733 | GFRA3      | ENST00000274721 | p.L87L   | c.261G>A  | Unverified | TGC | CTG | GAG | 3 | G | A |
| TCGA-61-1733 | GFRA3      | ENST00000274721 | p.L87L   | c.261G>A  | Unverified | TGC | CTG | GAG | 3 | G | A |
| TCGA-04-1367 | GGA1       | ENST00000343632 | p.M362I  | c.1086G>A | Verified   | CTC | ATG | TCT | 3 | G | A |
| TCGA-29-1766 | GGT1       | ENST00000400380 | p.A110T  | c.328G>A  | Unverified | GTG | GCC | CCC | 1 | G | A |
| TCGA-13-0913 | GGT5       | ENST00000327365 | p.V323I  | c.967G>A  | Verified   | CTT | GTA | GAG | 1 | G | A |
| TCGA-29-1770 | GHSR_ENST  | ENST00000427970 | p.R270H  | c.809G>A  | Unverified | CAG | CGC | GCG | 2 | G | A |
| TCGA-24-1846 | GIGYF1     | ENST00000275732 | p.G218R  | c.652G>A  | Unverified | GCA | GGG | CCC | 1 | G | A |
| TCGA-29-1783 | GIGYF2     | ENST00000373563 | p.E801K  | c.2401G>A | Unverified | CAA | GAA | ATT | 1 | G | A |
| TCGA-29-1783 | GIGYF2_ENS | ENST00000409451 | p.E822K  | c.2464G>A | Unverified | CAA | GAA | ATT | 1 | G | A |
| TCGA-09-1674 | GIMAP1     | ENST00000307194 | p.A114A  | c.342G>A  | Unverified | CAC | GCG | CTG | 3 | G | A |
| TCGA-61-2095 | GIT1       | ENST00000225394 | p.K331K  | c.993G>A  | Unverified | caa | aag | ctg | 3 | G | A |
| TCGA-30-1718 | GJA8       | ENST00000369235 | p.K303K  | c.909G>A  | Unverified | GAG | AAG | ATC | 3 | G | A |
| TCGA-30-1714 | GJB4       | ENST00000339480 | p.R32H   | c.95G>A   | Unverified | TTT | CGT | GTG | 2 | G | A |
| TCGA-24-1435 | GJB5       | ENST00000338513 | p.D247N  | c.739G>A  | Verified   | GGT | GAC | CTC | 1 | G | A |
| TCGA-09-1665 | GLI1       | ENST00000228682 | p.S112S  | c.336G>A  | Verified   | aac | tcg | cga | 3 | G | A |
| TCGA-23-1117 | GLI2       | ENST00000361492 | p.G1519D | c.4556G>A | Verified   | GAT | GGC | GAT | 2 | G | A |
| TCGA-23-1117 | GLI2       | ENST00000361492 | p.G1519D | c.4556G>A | Verified   | GAT | GGC | GAT | 2 | G | A |
| TCGA-09-2050 | GLO1       | ENST00000373365 | p.C20Y   | c.59G>A   | Verified   | TGC | TGC | TCC | 2 | G | A |
| TCGA-25-1313 | GLP2R      | ENST00000262441 | p.L434L  | c.1302G>A | Verified   | GCC | TTG | CAG | 3 | G | A |
| TCGA-09-2044 | GLRA3      | ENST00000274093 | p.A335T  | c.1003G>A | Verified   | TAT | GCA | GCT | 1 | G | A |
| TCGA-61-1913 | GLT1D1     | ENST00000281703 | p.G236E  | c.707G>A  | Unverified | AAC | GGA | AGG | 2 | G | A |
| TCGA-13-0886 | GMCL1      | ENST00000282570 | p.E322K  | c.964G>A  | Verified   | ACT | GAA | CAA | 1 | G | A |
| TCGA-23-1021 | GMIP       | ENST00000203556 | p.A607A  | c.1821G>A | Verified   | CGA | GCG | TTG | 3 | G | A |
| TCGA-09-0369 | GNA12      | ENST00000275364 | p.R235H  | c.704G>A  | Verified   | cag | cgc | cag | 2 | G | A |
| TCGA-09-0369 | GNA12      | ENST00000275364 | p.R235H  | c.704G>A  | Verified   | cag | cgc | cag | 2 | G | A |
| TCGA-13-0885 | GNAI2      | ENST00000313601 | p.A114T  | c.340G>A  | Verified   | ACC | GCC | GAG | 1 | G | A |
| TCGA-04-1338 | GNAQ       | ENST00000286548 | p.E249K  | c.745G>A  | Verified   | atg | gag | gaa | 1 | G | A |
| TCGA-29-1784 | GNL2       | ENST00000373062 | p.E480K  | c.1438G>A | Unverified | TTG | GAA | GTT | 1 | G | A |
| TCGA-23-1124 | GOLGA2     | ENST00000421699 | p.D489N  | c.1465G>A | Verified   | CAA | GAC | AAT | 1 | G | A |
| TCGA-04-1336 | GOLGA8C    | ENST00000446144 | p.V383V  | c.1149G>A | Unverified | CCT | GTG | CAA | 3 | G | A |
| TCGA-13-0903 | GOLGB1     | ENST00000340645 | p.A2789T | c.8365G>A | Verified   | ACC | GCC | TTT | 1 | G | A |
| TCGA-04-1347 | GOLPH3     | ENST00000265070 | p.A295A  | c.885G>A  | Verified   | GCG | GCG | TTC | 3 | G | A |
| TCGA-25-1313 | GON4L      | ENST00000361040 | p.D1237N | c.3709G>A | Verified   | GCT | GAT | GGG | 1 | G | A |

|              |            |                 |          |           |            |     |     |     |   |   |   |
|--------------|------------|-----------------|----------|-----------|------------|-----|-----|-----|---|---|---|
| TCGA-24-2288 | GON4L_ENS  | ENST00000437809 | p.D1620N | c.4858G>A | Unverified | CGA | GAT | CCA | 1 | G | A |
| TCGA-10-0930 | GON4L_ENS  | ENST00000437809 | p.L1808L | c.5424G>A | Verified   | GCC | CTG | CCT | 3 | G | A |
| TCGA-10-0930 | GON4L_ENS  | ENST00000437809 | p.L1808L | c.5424G>A | Verified   | GCC | CTG | CCT | 3 | G | A |
| TCGA-61-1900 | GPAA1      | ENST00000355091 | p.R484Q  | c.1451G>A | Unverified | CAC | CGG | GTG | 2 | G | A |
| TCGA-13-1408 | GPATCH8    | ENST00000335500 | p.D321N  | c.961G>A  | Verified   | AAG | GAC | CAT | 1 | G | A |
| TCGA-24-2035 | GPBP1      | ENST00000506184 | p.G93R   | c.277G>A  | Unverified | GGT | GGA | AGT | 1 | G | A |
| TCGA-29-1769 | GPBP1L1    | ENST00000290795 | p.A371T  | c.1111G>A | Unverified | CTT | GCC | CTC | 1 | G | A |
| TCGA-09-1665 | GPCPD1     | ENST00000379019 | p.D246N  | c.736G>A  | Unverified | GGT | GAT | GCC | 1 | G | A |
| TCGA-29-1690 | GPR1       | ENST00000407325 | p.V59I   | c.175G>A  | Unverified | ATC | GTC | ATT | 1 | G | A |
| TCGA-23-1114 | GPR1       | ENST00000407325 | p.S297N  | c.890G>A  | Unverified | AAT | AGT | TGC | 2 | G | A |
| TCGA-25-2400 | GPR109B    | ENST00000528880 | p.G350S  | c.1048G>A | Verified   | TCC | GGT | GAG | 1 | G | A |
| TCGA-61-1914 | GPR111     | ENST00000398742 | p.G387D  | c.1160G>A | Unverified | CTG | GGC | ATT | 2 | G | A |
| TCGA-61-1914 | GPR111_EN: | ENST00000296862 | p.G455D  | c.1364G>A | Unverified | CTG | GGC | ATT | 2 | G | A |
| TCGA-24-1104 | GPR112     | ENST00000394143 | p.G948E  | c.2843G>A | Verified   | gag | gga | att | 2 | G | A |
| TCGA-30-1857 | GPR113     | ENST00000333478 | p.G484S  | c.1450G>A | Unverified | CCT | GGC | CTG | 1 | G | A |
| TCGA-30-1857 | GPR113_EN: | ENST00000311519 | p.G683S  | c.2047G>A | Unverified | CCT | GGC | CTG | 1 | G | A |
| TCGA-61-1998 | GPR115     | ENST00000327753 | p.W427*  | c.1281G>A | Verified   | GTG | TGG | TCC | 3 | G | A |
| TCGA-13-0760 | GPR132     | ENST00000329797 | p.V145V  | c.435G>A  | Verified   | GTG | GTG | TAC | 3 | G | A |
| TCGA-25-2398 | GPR142     | ENST00000335666 | p.W66*   | c.197G>A  | Verified   | AGC | TGG | GAC | 2 | G | A |
| TCGA-24-2290 | GPR149     | ENST00000389740 | p.R542H  | c.1625G>A | Verified   | CAG | CGT | TCC | 2 | G | A |
| TCGA-24-2290 | GPR149     | ENST00000389740 | p.R542H  | c.1625G>A | Verified   | CAG | CGT | TCC | 2 | G | A |
| TCGA-24-1844 | GPR149     | ENST00000389740 | p.S84S   | c.252G>A  | Unverified | CTG | TCG | GTG | 3 | G | A |
| TCGA-13-0762 | GPR174     | ENST00000276077 | p.G223E  | c.668G>A  | Unverified | ctt | gga | gag | 2 | G | A |
| TCGA-13-0762 | GPR174     | ENST00000276077 | p.G223E  | c.668G>A  | Unverified | ctt | gga | gag | 2 | G | A |
| TCGA-24-1470 | GPR22      | ENST00000304402 | p.V19V   | c.57G>A   | Verified   | ACA | GTG | CGA | 3 | G | A |
| TCGA-29-1761 | GPR32      | ENST00000270590 | p.A175A  | c.525G>A  | Unverified | TCT | GCG | CAC | 3 | G | A |
| TCGA-29-1783 | GPR34      | ENST00000378142 | p.R152H  | c.455G>A  | Unverified | gat | cgc | tat | 2 | G | A |
| TCGA-30-1855 | GPR39      | ENST00000329321 | p.S337S  | c.1011G>A | Unverified | agc | tcg | gtc | 3 | G | A |
| TCGA-09-0369 | GPR62      | ENST00000322241 | p.A315T  | c.943G>A  | Verified   | CGG | GCC | TGC | 1 | G | A |
| TCGA-09-0369 | GPR62      | ENST00000322241 | p.A315T  | c.943G>A  | Verified   | CGG | GCC | TGC | 1 | G | A |
| TCGA-29-1769 | GPR83      | ENST00000243673 | p.L6L    | c.18G>A   | Unverified | CTC | TTG | CTG | 3 | G | A |
| TCGA-23-1124 | GPR98      | ENST00000405460 | p.R2424K | c.7271G>A | Verified   | TGG | AGA | ACT | 2 | G | A |
| TCGA-13-1507 | GPRC5C     | ENST00000392627 | p.A66T   | c.196G>A  | Verified   | GGG | GCC | TGG | 1 | G | A |
| TCGA-29-1775 | GPRIN3     | ENST00000333209 | p.R761Q  | c.2282G>A | Unverified | TTC | CGA | CGC | 2 | G | A |



|              |            |                 |          |             |            |     |     |     |   |   |   |
|--------------|------------|-----------------|----------|-------------|------------|-----|-----|-----|---|---|---|
| TCGA-13-0807 | GPS2       | ENST00000389167 | p.R272H  | c.815G>A    | Verified   | CTG | CGC | CCC | 2 | G | A |
| TCGA-24-1846 | GREB1_ENS  | ENST00000381486 | p.G1031E | c.3092G>A   | Unverified | AGT | GGG | ATG | 2 | G | A |
| TCGA-61-2095 | GRHL3      | ENST00000236255 | p.V266I  | c.796G>A    | Verified   | CCC | GTC | ACC | 1 | G | A |
| TCGA-29-2427 | GRIA1      | ENST00000285900 | p.G898G  | c.2694G>A   | Verified   | TCA | GGG | ATG | 3 | G | A |
| TCGA-23-1111 | GRIA1      | ENST00000285900 | p.L638L  | c.1914G>A   | Unverified | TTC | CTG | ACC | 3 | G | A |
| TCGA-23-1111 | GRIA1_ENST | ENST00000544403 | p.L638L  | c.1914G>A   | Unverified | TTC | CTG | ACC | 3 | G | A |
| TCGA-61-1733 | GRID2      | ENST00000282020 | p.D518N  | c.1552G>A   | Unverified | GCC | GAC | ATA | 1 | G | A |
| TCGA-61-1733 | GRID2      | ENST00000282020 | p.D518N  | c.1552G>A   | Unverified | GCC | GAC | ATA | 1 | G | A |
| TCGA-20-1685 | GRIK4      | ENST00000527524 | p.R198Q  | c.593G>A    | Unverified | ACC | CGG | GAC | 2 | G | A |
| TCGA-13-1498 | GRIK5      | ENST00000262895 | p.R41H   | c.122G>A    | Unverified | GAG | CGT | CTG | 2 | G | A |
| TCGA-24-2262 | GRIK5      | ENST00000262895 | p.R62Q   | c.185G>A    | Unverified | GCC | CGA | GTG | 2 | G | A |
| TCGA-13-0755 | GRIN2A     | ENST00000396573 | p.G532E  | c.1595G>A   | Verified   | acg | gga | atc | 2 | G | A |
| TCGA-24-2280 | GRIN2D     | ENST00000263269 | p.E743K  | c.2227G>A   | Unverified | GAG | GAA | GCG | 1 | G | A |
| TCGA-24-2280 | GRIN2D     | ENST00000263269 | p.K720K  | c.2160G>A   | Unverified | GAG | AAG | AAC | 3 | G | A |
| TCGA-04-1337 | GRIPAP1_EN | ENST00000376441 | p.R90H   | c.269G>A    | Unverified | TTC | CGT | TTG | 2 | G | A |
| TCGA-04-1337 | GRIPAP1_EN | ENST00000376441 | p.?      | c.2433+1G>A | Unverified | CAC | AAG | GAT | 3 | G | A |
| TCGA-30-1718 | GRM4       | ENST00000374181 | p.A180T  | c.538G>A    | Unverified | TAC | GCC | TCC | 1 | G | A |
| TCGA-30-1718 | GRM4_ENST  | ENST00000374177 | p.A111T  | c.331G>A    | Unverified | TAC | GCC | TCC | 1 | G | A |
| TCGA-30-1718 | GRM4_ENST  | ENST00000374181 | p.A180T  | c.538G>A    | Unverified | TAC | GCC | TCC | 1 | G | A |
| TCGA-36-1577 | GRM5       | ENST00000305432 | p.A855T  | c.2563G>A   | Unverified | TCC | GCA | GCC | 1 | G | A |
| TCGA-23-2078 | GRM7       | ENST00000389335 | p.R516Q  | c.1547G>A   | Verified   | GTC | CGA | GAG | 2 | G | A |
| TCGA-23-1032 | GRWD1      | ENST00000253237 | p.V446I  | c.1336G>A   | Verified   | AGC | GTC | TGA | 1 | G | A |
| TCGA-29-1775 | GSDMC      | ENST00000276708 | p.L477L  | c.1431G>A   | Unverified | GAG | CTG | GAT | 3 | G | A |
| TCGA-30-1714 | GSN        | ENST00000373823 | p.G584S  | c.1750G>A   | Unverified | GAA | GGC | AGC | 1 | G | A |
| TCGA-29-1783 | GSN        | ENST00000373823 | p.G143G  | c.429G>A    | Unverified | AAA | GGG | CGG | 3 | G | A |
| TCGA-30-1714 | GSN_ENSTO  | ENST00000373818 | p.G635S  | c.1903G>A   | Unverified | GAA | GGC | AGC | 1 | G | A |
| TCGA-29-1783 | GSN_ENSTO  | ENST00000373818 | p.G194G  | c.582G>A    | Unverified | AAA | GGG | CGG | 3 | G | A |
| TCGA-13-1505 | GSTT1      | ENST00000248935 | p.T172T  | c.516G>A    | Verified   | ATC | ACG | GAG | 3 | G | A |
| TCGA-04-1655 | GTF2I      | ENST00000324896 | p.G588R  | c.1762G>A   | Unverified | CTT | GGA | CTC | 1 | G | A |
| TCGA-09-0369 | GTF2IRD1   | ENST00000265755 | p.V375M  | c.1123G>A   | Verified   | CCC | GTG | CCC | 1 | G | A |
| TCGA-09-0369 | GTF2IRD1   | ENST00000265755 | p.V375M  | c.1123G>A   | Verified   | CCC | GTG | CCC | 1 | G | A |
| TCGA-13-1488 | GTF2IRD2B  | ENST00000312575 | p.S500S  | c.1500G>A   | Unverified | GGC | TCG | TCA | 3 | G | A |
| TCGA-13-0903 | GTF3C1     | ENST00000356183 | p.G733E  | c.2198G>A   | Verified   | CAA | GGG | GAG | 2 | G | A |
| TCGA-29-1705 | GTF3C4     | ENST00000372146 | p.E667K  | c.1999G>A   | Unverified | GAA | GAG | AAA | 1 | G | A |

|              |           |                 |          |             |            |     |     |     |   |   |   |
|--------------|-----------|-----------------|----------|-------------|------------|-----|-----|-----|---|---|---|
| TCGA-29-1784 | GTSF1L    | ENST00000373003 | p.E72K   | c.214G>A    | Unverified | GAA | GAG | GAC | 1 | G | A |
| TCGA-23-1111 | GUCY1A3   | ENST00000296518 | p.V233M  | c.697G>A    | Unverified | GAA | GTG | TCG | 1 | G | A |
| TCGA-13-0920 | GYLTL1B   | ENST00000325468 | p.L393L  | c.1179G>A   | Verified   | GCC | CTG | GCA | 3 | G | A |
| TCGA-30-1856 | GYS2      | ENST00000261195 | p.R580H  | c.1739G>A   | Unverified | CGC | CGC | CAA | 2 | G | A |
| TCGA-29-1703 | GZF1      | ENST00000338121 | p.R545H  | c.1634G>A   | Unverified | GAG | CGT | CCC | 2 | G | A |
| TCGA-13-0714 | HAPLN1    | ENST00000274341 | p.R260H  | c.779G>A    | Verified   | GGC | CGT | TTT | 2 | G | A |
| TCGA-13-0885 | HAS1      | ENST00000222115 | p.C334Y  | c.1001G>A   | Verified   | CAC | TGT | ACT | 2 | G | A |
| TCGA-61-1904 | HAS1      | ENST00000222115 | p.R564Q  | c.1691G>A   | Unverified | GTG | CGG | AGG | 2 | G | A |
| TCGA-24-1563 | HAS2      | ENST00000303924 | p.W148*  | c.443G>A    | Verified   | ATC | TGG | AAG | 2 | G | A |
| TCGA-61-2102 | HCAR2     | ENST00000328880 | p.L6L    | c.18G>A     | Verified   | CAT | CTG | CAG | 3 | G | A |
| TCGA-61-2102 | HCAR3     | ENST00000528880 | p.L6L    | c.18G>A     | Verified   | CAT | CTG | CAG | 3 | G | A |
| TCGA-13-0885 | HCK       | ENST00000538448 | p.E389K  | c.1165G>A   | Verified   | AAC | GAG | TAC | 1 | G | A |
| TCGA-61-1904 | HCN3      | ENST00000368358 | p.R296H  | c.887G>A    | Unverified | GGC | CGC | CAG | 2 | G | A |
| TCGA-24-1435 | HCN4      | ENST00000261917 | p.V534M  | c.1600G>A   | Verified   | CAG | GTG | GAG | 1 | G | A |
| TCGA-23-1809 | HDAC10    | ENST00000216271 | p.G553S  | c.1657G>A   | Unverified | acc | ggt | ggt | 1 | G | A |
| TCGA-29-1775 | HDAC6     | ENST00000334136 | p.G758S  | c.2272G>A   | Unverified | gag | ggt | tat | 1 | G | A |
| TCGA-36-1577 | HDAC7     | NM_015401.1     | p.A808T  | c.2422G>A   | Unverified | ccg | gcc | cca | 1 | G | A |
| TCGA-09-2049 | HEATR5B   | ENST00000233099 | p.A1671T | c.5011G>A   | Verified   | AGA | GCT | GCT | 1 | G | A |
| TCGA-24-1104 | HEATR5B   | ENST00000233099 | p.A1951A | c.5853G>A   | Verified   | TTA | GCG | GTT | 3 | G | A |
| TCGA-10-0930 | HECW1     | ENST00000395891 | p.R1124H | c.3371G>A   | Verified   | CTT | CGC | CAG | 2 | G | A |
| TCGA-10-0930 | HECW1     | ENST00000395891 | p.R1124H | c.3371G>A   | Verified   | CTT | CGC | CAG | 2 | G | A |
| TCGA-61-2113 | HECW1     | ENST00000395891 | p.L1391L | c.4173G>A   | Verified   | AGT | TTG | CAG | 3 | G | A |
| TCGA-30-1856 | HECW1     | ENST00000395891 | p.T492T  | c.1476G>A   | Unverified | GCA | ACG | ACC | 3 | G | A |
| TCGA-30-1856 | HECW1_ENS | ENST00000395891 | p.T492T  | c.1476G>A   | Unverified | GCA | ACG | ACC | 3 | G | A |
| TCGA-23-1022 | HECW2     | ENST00000260983 | p.S60N   | c.179G>A    | Verified   | tcc | agc | tta | 2 | G | A |
| TCGA-24-1604 | HEG1      | ENST00000311127 | p.E191E  | c.573G>A    | Verified   | CTG | GAG | ATA | 3 | G | A |
| TCGA-04-1652 | HEPH      | NM_138737.1     | p.L374L  | c.1122G>A   | Unverified | gac | ctg | ctc | 3 | G | A |
| TCGA-04-1652 | HEPH      | NM_138737.1     | p.L374L  | c.1122G>A   | Unverified | gac | ctg | ctc | 3 | G | A |
| TCGA-29-1775 | HERC3     | ENST00000402738 | p.S956S  | c.2868G>A   | Unverified | tac | tcg | gcc | 3 | G | A |
| TCGA-04-1367 | HERPUD2   | ENST00000396081 | p.R285Q  | c.854G>A    | Verified   | TCA | CGA | GCT | 2 | G | A |
| TCGA-30-1857 | HFM1      | ENST00000370425 | p.?      | c.3884-1G>A | Unverified | TCA | GGA | TTT | 2 | G | A |
| TCGA-61-2008 | HGF       | ENST00000222390 | p.W329*  | c.987G>A    | Verified   | CGT | TGG | GAT | 3 | G | A |
| TCGA-24-1417 | HGS       | ENST00000329138 | p.K51K   | c.153G>A    | Verified   | AAG | AAG | AAA | 3 | G | A |
| TCGA-24-1463 | HHAT      | ENST00000367010 | p.D235N  | c.703G>A    | Verified   | CAT | GAC | TCC | 1 | G | A |

|              |            |                 |          |            |            |     |     |     |   |   |   |
|--------------|------------|-----------------|----------|------------|------------|-----|-----|-----|---|---|---|
| TCGA-13-1507 | HHAT       | ENST00000367010 | p.R348K  | c.1043G>A  | Verified   | ATC | AGG | TAT | 2 | G | A |
| TCGA-20-0991 | HHATL      | ENST00000310417 | p.G167D  | c.500G>A   | Verified   | ACA | GGC | ACT | 2 | G | A |
| TCGA-29-1762 | HIATL1     | ENST00000375344 | p.V351M  | c.1051G>A  | Unverified | ACC | GTG | GCT | 1 | G | A |
| TCGA-13-1488 | HIATL1     | ENST00000375344 | p.R109R  | c.327G>A   | Verified   | GGG | AGG | AAG | 3 | G | A |
| TCGA-29-1691 | HIP1       | ENST00000336926 | p.L279L  | c.837G>A   | Unverified | AAC | CTG | CAG | 3 | G | A |
| TCGA-61-1914 | HIST1H1C   | ENST00000343677 | p.V40V   | c.120G>A   | Unverified | ccg | gtg | tca | 3 | G | A |
| TCGA-25-1326 | HIST1H1E   | ENST00000304218 | p.K217K  | c.651G>A   | Unverified | GCC | AAG | AAA | 3 | G | A |
| TCGA-29-1705 | HIST1H2AD  | ENST00000341023 | p.K37K   | c.111G>A   | Unverified | CGC | AAG | GGC | 3 | G | A |
| TCGA-24-1469 | HIST1H2BO_ | ENST00000303806 | p.E36K   | c.106G>A   | Unverified | AAA | GAG | AGT | 1 | G | A |
| TCGA-24-1422 | HIST1H3G   | ENST00000305910 | p.V47V   | c.141G>A   | Unverified | ACC | GTG | GCT | 3 | G | A |
| TCGA-23-2078 | HIST1H4E   | ENST00000360441 | p.R79H   | c.236G>A   | Unverified | AAA | CGC | AAG | 2 | G | A |
| TCGA-04-1651 | HIST1H4K   | ENST00000357549 | p.A90T   | c.268G>A   | Unverified | TAC | GCG | CTC | 1 | G | A |
| TCGA-04-1651 | HIST1H4K   | ENST00000357549 | p.A90T   | c.268G>A   | Unverified | TAC | GCG | CTC | 1 | G | A |
| TCGA-13-0916 | HIST1H4K   | ENST00000357549 | p.V66V   | c.198G>A   | Unverified | AAC | GTG | ATC | 3 | G | A |
| TCGA-23-1021 | HIST1H4L   | ENST00000355981 | p.D25N   | c.73G>A    | Verified   | CGC | GAC | AAC | 1 | G | A |
| TCGA-23-1031 | HIST3H2A   | ENST00000366695 | p.L97L   | c.291G>A   | Verified   | AAG | CTG | CTG | 3 | G | A |
| TCGA-13-1488 | HIST4H4    | ENST00000358064 | p.R40Q   | c.119G>A   | Verified   | GCC | CGA | CGT | 2 | G | A |
| TCGA-24-1470 | HIVEP1     | ENST00000379388 | p.G916R  | c.2746G>A  | Verified   | ACT | GGA | CAG | 1 | G | A |
| TCGA-24-1104 | HIVEP2     | ENST00000012134 | p.S157N  | c.470G>A   | Verified   | TCA | AGT | CTG | 2 | G | A |
| TCGA-20-0990 | HIVEP3     | ENST00000372583 | p.V475M  | c.1423G>A  | Verified   | GCC | GTG | GTG | 1 | G | A |
| TCGA-13-1509 | HK3        | ENST00000292432 | p.G12E   | c.35G>A    | Verified   | CAG | GGG | GAA | 2 | G | A |
| TCGA-61-1737 | HKDC1      | ENST00000354624 | p.L874L  | c.2622G>A  | Unverified | ATA | TTG | CAG | 3 | G | A |
| TCGA-09-2050 | HLA-DRA    | ENST00000395388 | p.M98I   | c.294G>A   | Verified   | ATC | ATG | ACA | 3 | G | A |
| TCGA-13-0755 | HLCS       | ENST00000399120 | p.S83N   | c.248G>A   | Verified   | GGG | AGT | GAG | 2 | G | A |
| TCGA-29-1702 | HMBS       | ENST00000278715 | p.R116Q  | c.347G>A   | Unverified | AAG | CGG | GAA | 2 | G | A |
| TCGA-13-0885 | HMCN1      | ENST00000271588 | p.D360N  | c.1078G>A  | Verified   | ATA | GAT | CTT | 1 | G | A |
| TCGA-29-1693 | HMCN1      | ENST00000271588 | p.R5172H | c.15515G>A | Unverified | TAT | CGC | TGT | 2 | G | A |
| TCGA-29-1781 | HMCN1      | ENST00000271588 | p.R3795Q | c.11384G>A | Unverified | AGG | CGA | ATA | 2 | G | A |
| TCGA-61-2102 | HMCN1      | ENST00000271588 | p.R2533H | c.7598G>A  | Verified   | GGC | CGT | TTT | 2 | G | A |
| TCGA-29-1701 | HMGCR      | ENST00000511206 | p.E446K  | c.1336G>A  | Unverified | aat | gaa | gaa | 1 | G | A |
| TCGA-24-2024 | HMGCS2     | ENST00000369406 | p.W179*  | c.537G>A   | Verified   | AAC | TGG | ATG | 3 | G | A |
| TCGA-24-1849 | HMMR       | ENST00000358715 | p.E203K  | c.607G>A   | Unverified | CTC | GAA | GAG | 1 | G | A |
| TCGA-13-0884 | HMP19      | ENST00000303177 | p.R131H  | c.392G>A   | Unverified | AGC | CGC | TTC | 2 | G | A |
| TCGA-24-0979 | HNF4A      | ENST00000316099 | p.L393L  | c.1179G>A  | Verified   | cac | ctg | atg | 3 | G | A |

|              |            |                     |          |            |            |     |     |     |   |   |   |
|--------------|------------|---------------------|----------|------------|------------|-----|-----|-----|---|---|---|
| TCGA-10-0930 | HNRNPA1    | ENST00000546500     | p.E28K   | c.82G>A    | Verified   | GAT | GAG | AGC | 1 | G | A |
| TCGA-10-0930 | HNRNPA1    | ENST00000546500     | p.E28K   | c.82G>A    | Verified   | GAT | GAG | AGC | 1 | G | A |
| TCGA-25-2401 | HOXA1      | ENST00000343060     | p.G133E  | c.398G>A   | Verified   | TCT | GGA | AAT | 2 | G | A |
| TCGA-13-1497 | HOXA6      | ENST00000222728     | p.V6V    | c.18G>A    | Verified   | TTT | GTG | AAT | 3 | G | A |
| TCGA-13-0923 | HOXB4      | ENST00000332503     | p.A135T  | c.403G>A   | Verified   | TCC | GCG | TGC | 1 | G | A |
| TCGA-04-1367 | HOXD10     | ENST00000249501     | p.V213I  | c.637G>A   | Unverified | AAA | GTC | TCC | 1 | G | A |
| TCGA-13-0884 | HOXD10     | ENST00000249501     | p.E250K  | c.748G>A   | Verified   | GAG | GAA | ATC | 1 | G | A |
| TCGA-61-1733 | HOXD10     | ENST00000249501     | p.V148I  | c.442G>A   | Unverified | CCC | GTC | CCT | 1 | G | A |
| TCGA-61-1733 | HOXD10     | ENST00000249501     | p.V148I  | c.442G>A   | Unverified | CCC | GTC | CCT | 1 | G | A |
| TCGA-09-2050 | HPS5       | ENST00000349215     | p.A1002T | c.3004G>A  | Verified   | gag | gcc | ttc | 1 | G | A |
| TCGA-04-1347 | HPSE       | ENST00000311412     | p.V268I  | c.802G>A   | Verified   | GAT | GTT | GGT | 1 | G | A |
| TCGA-29-1690 | HRNR       | ENST00000368801     | p.G2277S | c.6829G>A  | Unverified | CAC | GGT | CAG | 1 | G | A |
| TCGA-29-1775 | HS2ST1     | ENST00000370550     | p.R188R  | c.564G>A   | Unverified | TTA | CGG | AGA | 3 | G | A |
| TCGA-29-1775 | HS2ST1_ENS | ENST00000370548     | p.R162R  | c.486G>A   | Unverified | TTA | CGG | AGA | 3 | G | A |
| TCGA-04-1342 | HSD17B7    | ENST00000254521     | p.P245P  | c.735G>A   | Verified   | ATG | CCG | GCA | 3 | G | A |
| TCGA-61-1910 | HSF2BP     | ENST00000291560     | p.S167S  | c.501G>A   | Unverified | AAG | TCG | TTA | 3 | G | A |
| TCGA-29-1698 | HSPB9      | ENST00000355067     | p.K153K  | c.459G>A   | Unverified | tct | aag | gct | 3 | G | A |
| TCGA-24-2288 | HSPG2      | ENST00000374695     | p.R3732K | c.11195G>A | Unverified | GGA | AGG | CCC | 2 | G | A |
| TCGA-23-1111 | HTR1A      | ENST00000323865     | p.A280T  | c.838G>A   | Unverified | GGC | GCG | GTG | 1 | G | A |
| TCGA-29-1702 | HTR1A      | ENST00000323865     | p.A131T  | c.391G>A   | Unverified | ATC | GCG | CTG | 1 | G | A |
| TCGA-29-1766 | HTR2C      | ENST00000371951     | p.V208M  | c.622G>A   | Unverified | tgc | gtg | ctc | 1 | G | A |
| TCGA-24-1844 | HTR3C      | ENST00000318351     | p.G139S  | c.415G>A   | Unverified | TCC | GGT | CTC | 1 | G | A |
| TCGA-61-2012 | HTR3C      | ENST00000318351     | p.V128M  | c.382G>A   | Verified   | ATC | GTG | GAA | 1 | G | A |
| TCGA-04-1337 | HTR5A      | ENST00000287907     | p.V239I  | c.715G>A   | Verified   | AGC | GTC | TCA | 1 | G | A |
| TCGA-23-1116 | HTRA3      | ENST00000307358     | p.A331T  | c.991G>A   | Unverified | TTT | GCC | ATC | 1 | G | A |
| TCGA-30-1718 | HTT        | ENST00000355072     | p.L1641L | c.4923G>A  | Unverified | ATT | TTG | GCC | 3 | G | A |
| TCGA-13-0884 | HTT        | ENST00000355072     | p.S556S  | c.1668G>A  | Verified   | TCG | TCG | CCC | 3 | G | A |
| TCGA-29-1691 | HUS1       | ENST00000436444     | p.S85S   | c.255G>A   | Unverified | aca | tcg | gaa | 3 | G | A |
| TCGA-04-1356 | HUWE1      | XM_497119.1         | p.S2047N | c.6140G>A  | Unverified | atc | agt | act | 2 | G | A |
| TCGA-09-2050 | HYAL3      | ENST00000336307     | p.C19Y   | c.56G>A    | Unverified | GGT | TGT | GGC | 2 | G | A |
| TCGA-25-1318 | HYDIN      | ENST00000321489     | p.M994I  | c.2982G>A  | Unverified | AGC | ATG | GAG | 3 | G | A |
| TCGA-25-1318 | HYDIN      | ENST00000321489     | p.M994I  | c.2982G>A  | Unverified | AGC | ATG | GAG | 3 | G | A |
| TCGA-24-1844 | HYDIN_ENS1 | ENST00000316490_v65 | p.A3778T | c.11332G>A | Unverified | CCT | GCT | CAC | 1 | G | A |
| TCGA-61-1914 | HYDIN_ENS1 | ENST00000316490_v65 | p.E3130K | c.9388G>A  | Unverified | ATT | GAG | CAC | 1 | G | A |

|              |            |                     |          |             |            |     |     |     |   |   |   |
|--------------|------------|---------------------|----------|-------------|------------|-----|-----|-----|---|---|---|
| TCGA-61-1738 | HYDIN_ENS  | ENST00000316490_v65 | p.R3964H | c.11891G>A  | Unverified | CAG | CGC | AAC | 2 | G | A |
| TCGA-61-1738 | HYDIN_ENS  | ENST00000316490_v65 | p.R3964H | c.11891G>A  | Unverified | CAG | CGC | AAC | 2 | G | A |
| TCGA-29-1770 | HYDIN_ENS  | ENST00000316490_v65 | p.Q1050Q | c.3150G>A   | Unverified | ATC | CAG | CTC | 3 | G | A |
| TCGA-23-1021 | HYI        | ENST00000372430     | p.D91N   | c.271G>A    | Verified   | CTG | GAC | ACG | 1 | G | A |
| TCGA-20-0991 | IER5       | ENST00000367577     | p.K29K   | c.87G>A     | Unverified | ATC | AAG | CTG | 3 | G | A |
| TCGA-04-1649 | IFLTD1     | ENST00000282881     | p.A213T  | c.637G>A    | Unverified | GAA | GCA | AAG | 1 | G | A |
| TCGA-04-1649 | IFLTD1_ENS | ENST00000458174     | p.A234T  | c.700G>A    | Unverified | GAA | GCA | AAG | 1 | G | A |
| TCGA-24-1850 | IFNAR1     | ENST00000270139     | p.E522K  | c.1564G>A   | Unverified | GAT | GAA | GAT | 1 | G | A |
| TCGA-13-0887 | IFT57      | ENST00000264538     | p.E184K  | c.550G>A    | Verified   | gca | gaa | tta | 1 | G | A |
| TCGA-61-1740 | IFT80      | ENST00000326448     | p.L580L  | c.1740G>A   | Unverified | TCC | CTG | GTT | 3 | G | A |
| TCGA-25-2042 | IGDCC3     | ENST00000327987     | p.R377R  | c.1131G>A   | Verified   | GTC | AGG | CTC | 3 | G | A |
| TCGA-20-1686 | IGF2BP1    | ENST00000290341     | p.V13M   | c.37G>A     | Unverified | agc | gtg | acc | 1 | G | A |
| TCGA-24-1469 | IGF2BP3    | ENST00000258729     | p.E341E  | c.1023G>A   | Verified   | GAG | GAG | GAG | 3 | G | A |
| TCGA-24-1845 | IGHMBP2    | ENST00000255078     | p.G589S  | c.1765G>A   | Unverified | GTT | GGT | TTT | 1 | G | A |
| TCGA-04-1343 | IGSF21     | ENST00000251296     | p.A459T  | c.1375G>A   | Verified   | CTC | GCC | CTG | 1 | G | A |
| TCGA-23-1118 | IGSF22     | ENST00000319338     | p.?      | c.2695+1G>A | Verified   | CCA | GGG | CTC | 1 | G | A |
| TCGA-24-2280 | IGSF3      | ENST00000369486     | p.V1036M | c.3106G>A   | Unverified | AGC | GTG | GGC | 1 | G | A |
| TCGA-23-1032 | IL12RB2    | ENST00000262345     | p.G370R  | c.1108G>A   | Unverified | GGA | GGG | AAA | 1 | G | A |
| TCGA-61-1740 | IL16       | NM_172217.1         | p.V218M  | c.652G>A    | Unverified | atc | gtg | ctg | 1 | G | A |
| TCGA-61-1740 | IL16_ENSTO | ENST00000302987     | p.V218M  | c.652G>A    | Unverified | ATC | GTG | CTG | 1 | G | A |
| TCGA-29-1777 | IL17RA     | ENST00000319363     | p.?      | c.598+1G>A  | Unverified | TCA | GGC | AGC | 1 | G | A |
| TCGA-09-1665 | IL17RC     | ENST00000295981     | p.E269K  | c.805G>A    | Verified   | CTC | GAA | GTC | 1 | G | A |
| TCGA-29-1770 | IL1R2      | ENST00000393414     | p.A284T  | c.850G>A    | Unverified | AGC | GCC | TAC | 1 | G | A |
| TCGA-13-0762 | IL1RAPL1   | ENST00000378993     | p.K440K  | c.1320G>A   | Verified   | GAA | AAG | CAT | 3 | G | A |
| TCGA-13-0762 | IL1RAPL1   | ENST00000378993     | p.K440K  | c.1320G>A   | Verified   | GAA | AAG | CAT | 3 | G | A |
| TCGA-23-1116 | IL20RA     | ENST00000316649     | p.W482*  | c.1445G>A   | Unverified | GAC | TGG | GAT | 2 | G | A |
| TCGA-25-2398 | IL21R      | ENST00000337929     | p.G422E  | c.1265G>A   | Verified   | GCA | GGG | ACC | 2 | G | A |
| TCGA-24-1417 | IL21R      | ENST00000337929     | p.W253*  | c.759G>A    | Verified   | TTC | TGG | AGC | 3 | G | A |
| TCGA-61-1899 | IL28RA     | ENST00000327535     | p.E378K  | c.1132G>A   | Unverified | AGC | GAA | GGC | 1 | G | A |
| TCGA-24-2290 | IL2RA      | ENST00000379959     | p.R176K  | c.527G>A    | Verified   | ACA | AGG | TGG | 2 | G | A |
| TCGA-24-2290 | IL2RA      | ENST00000379959     | p.R176K  | c.527G>A    | Verified   | ACA | AGG | TGG | 2 | G | A |
| TCGA-25-2392 | IL36A      | ENST00000259211     | p.G80R   | c.238G>A    | Verified   | GTC | GGG | GAC | 1 | G | A |
| TCGA-61-2012 | IL36B      | ENST00000259213     | p.K97K   | c.291G>A    | Verified   | GGG | AAG | GAC | 3 | G | A |
| TCGA-04-1347 | IL37       | ENST00000263326     | p.L98L   | c.294G>A    | Verified   | TCC | TTG | AGC | 3 | G | A |

|              |            |                 |          |           |            |     |     |     |   |   |   |
|--------------|------------|-----------------|----------|-----------|------------|-----|-----|-----|---|---|---|
| TCGA-13-0913 | IL4R       | ENST00000395762 | p.E577K  | c.1729G>A | Verified   | cag | gag | ttt | 1 | G | A |
| TCGA-25-2400 | IL5RA      | ENST00000446632 | p.R253H  | c.758G>A  | Verified   | ACT | CGT | CTC | 2 | G | A |
| TCGA-09-1665 | IL6R       | ENST00000368485 | p.S443S  | c.1329G>A | Verified   | ACC | TCG | AGC | 3 | G | A |
| TCGA-23-1032 | ILF3       | ENST00000318511 | p.Q423Q  | c.1269G>A | Verified   | TCC | CAG | ACT | 3 | G | A |
| TCGA-09-0369 | ILKAP      | ENST00000254654 | p.T220T  | c.660G>A  | Verified   | GCC | ACG | TGT | 3 | G | A |
| TCGA-09-0369 | ILKAP      | ENST00000254654 | p.T220T  | c.660G>A  | Verified   | GCC | ACG | TGT | 3 | G | A |
| TCGA-13-1510 | IMPDH1     | ENST00000338791 | p.D341N  | c.1021G>A | Unverified | gat | gac | aaa | 1 | G | A |
| TCGA-24-1850 | IMPDH1     | ENST00000338791 | p.T479T  | c.1437G>A | Unverified | act | acg | gag | 3 | G | A |
| TCGA-61-2012 | IMPG1      | ENST00000369950 | p.K248K  | c.744G>A  | Verified   | TTC | AAG | GCA | 3 | G | A |
| TCGA-23-1111 | INPP5D_ENS | ENST00000359570 | p.E636K  | c.1906G>A | Unverified | GAG | GAA | GAA | 1 | G | A |
| TCGA-23-1031 | INPP5D_ENS | ENST00000359570 | p.E69K   | c.205G>A  | Unverified | TCC | GAA | GGC | 1 | G | A |
| TCGA-24-2289 | INPP5F     | ENST00000361976 | p.E597K  | c.1789G>A | Unverified | cag | gaa | cta | 1 | G | A |
| TCGA-04-1343 | INPPL1     | ENST00000298229 | p.R342Q  | c.1025G>A | Verified   | GGG | CGG | CTG | 2 | G | A |
| TCGA-09-2049 | INSRR      | ENST00000368195 | p.V698I  | c.2092G>A | Verified   | CAG | GTT | CTG | 1 | G | A |
| TCGA-20-0990 | INSRR      | ENST00000368195 | p.S353N  | c.1058G>A | Verified   | GGA | AGC | CTC | 2 | G | A |
| TCGA-29-1785 | INSRR_ENST | ENST00000368195 | p.A681T  | c.2041G>A | Unverified | GAG | GCC | GAG | 1 | G | A |
| TCGA-29-1785 | INSRR_ENST | ENST00000368195 | p.A681T  | c.2041G>A | Unverified | GAG | GCC | GAG | 1 | G | A |
| TCGA-23-1809 | INTU       | ENST00000335251 | p.D504N  | c.1510G>A | Unverified | GAG | GAT | TAC | 1 | G | A |
| TCGA-13-1489 | INVS       | ENST00000262457 | p.K279K  | c.837G>A  | Verified   | AAT | AAG | TCT | 3 | G | A |
| TCGA-24-0975 | IPCEF1     | ENST00000367220 | p.A11T   | c.31G>A   | Unverified | AGT | GCT | CTT | 1 | G | A |
| TCGA-61-2109 | IPO13      | ENST00000372343 | p.V548M  | c.1642G>A | Unverified | TCT | GTG | TCC | 1 | G | A |
| TCGA-09-1674 | IPO9       | ENST00000361565 | p.V124M  | c.370G>A  | Unverified | AAA | GTG | CGC | 1 | G | A |
| TCGA-13-1499 | IPO9       | ENST00000361565 | p.E192K  | c.574G>A  | Verified   | CCA | GAG | ATG | 1 | G | A |
| TCGA-13-0887 | IPPK       | ENST00000287996 | p.R267Q  | c.800G>A  | Verified   | ACA | CGG | GTG | 2 | G | A |
| TCGA-25-2391 | IQCE       | ENST00000402050 | p.E409K  | c.1225G>A | Unverified | CAG | GAG | CAG | 1 | G | A |
| TCGA-24-1431 | IQGAP2     | ENST00000274364 | p.D1260N | c.3778G>A | Verified   | GTT | GAC | CCC | 1 | G | A |
| TCGA-04-1638 | IQGAP3     | ENST00000361170 | p.G1316G | c.3948G>A | Unverified | CTT | GGG | GAG | 3 | G | A |
| TCGA-61-1907 | IQGAP3     | ENST00000361170 | p.L811L  | c.2433G>A | Unverified | TAC | CTG | AGG | 3 | G | A |
| TCGA-24-1474 | IQSEC1     | ENST00000273221 | p.V593I  | c.1777G>A | Unverified | TGC | GTC | GTG | 1 | G | A |
| TCGA-61-1737 | IQSEC1     | ENST00000273221 | p.R549H  | c.1646G>A | Unverified | GAG | CGT | GGC | 2 | G | A |
| TCGA-24-1435 | IQSEC2     | XM_291345.2     | p.A401A  | c.1203G>A | Verified   | ccc | gcg | tac | 3 | G | A |
| TCGA-13-1512 | IRAK1      | ENST00000369980 | p.E587K  | c.1759G>A | Verified   | GTG | GAG | AGT | 1 | G | A |
| TCGA-04-1649 | IREB2      | ENST00000258886 | p.D463N  | c.1387G>A | Unverified | AGC | GAT | TTC | 1 | G | A |
| TCGA-61-1914 | IRF2BP2    | ENST00000366609 | p.P414P  | c.1242G>A | Unverified | ACA | CCG | CCT | 3 | G | A |

|              |            |                 |          |             |            |     |     |     |   |   |   |
|--------------|------------|-----------------|----------|-------------|------------|-----|-----|-----|---|---|---|
| TCGA-13-0762 | IRF3       | ENST00000309877 | p.E137K  | c.409G>A    | Verified   | CAG | GAA | GAC | 1 | G | A |
| TCGA-13-0762 | IRF3       | ENST00000309877 | p.E137K  | c.409G>A    | Verified   | CAG | GAA | GAC | 1 | G | A |
| TCGA-23-1021 | IRF4       | ENST00000380956 | p.V383V  | c.1149G>A   | Verified   | CAG | GTG | ACT | 3 | G | A |
| TCGA-29-1690 | IRF5       | NM_002200.3     | p.?      | c.543-1G>A  | Unverified | aag | tgg | ccg | 3 | G | A |
| TCGA-04-1638 | IRS4       | ENST00000372129 | p.G787S  | c.2359G>A   | Unverified | gcc | ggt | gca | 1 | G | A |
| TCGA-23-1021 | IRS4       | ENST00000372129 | p.A788T  | c.2362G>A   | Verified   | ggt | gca | att | 1 | G | A |
| TCGA-24-1844 | ISG20L2    | ENST00000368219 | p.G39D   | c.116G>A    | Unverified | AGA | GGC | TTT | 2 | G | A |
| TCGA-13-1507 | ISX        | ENST00000308700 | p.S187S  | c.561G>A    | Verified   | CCA | TCG | GCT | 3 | G | A |
| TCGA-25-2401 | ITGA1      | ENST00000282588 | p.R266Q  | c.797G>A    | Verified   | gcc | cgg | ggt | 2 | G | A |
| TCGA-04-1367 | ITGA10     | ENST00000369304 | p.R521H  | c.1562G>A   | Verified   | GGA | CGT | GTT | 2 | G | A |
| TCGA-13-0791 | ITGA2B     | ENST00000262407 | p.G472R  | c.1414G>A   | Verified   | tac | ggg | gcc | 1 | G | A |
| TCGA-61-1914 | ITGA2B     | ENST00000262407 | p.D632N  | c.1894G>A   | Unverified | ctg | gac | tgt | 1 | G | A |
| TCGA-13-0900 | ITGA2B     | ENST00000262407 | p.?      | c.2187+1G>A | Unverified | gcc | cag | ata | 3 | G | A |
| TCGA-24-1850 | ITGA8      | ENST00000378076 | p.T307T  | c.921G>A    | Unverified | ATG | ACG | TTT | 3 | G | A |
| TCGA-29-1699 | ITGAD      | ENST00000389202 | p.R859H  | c.2576G>A   | Unverified | AGC | CGC | TGC | 2 | G | A |
| TCGA-13-0900 | ITGAL      | ENST00000356798 | p.E506K  | c.1516G>A   | Verified   | GAA | GAA | GTC | 1 | G | A |
| TCGA-13-0903 | ITGAL      | ENST00000356798 | p.V58M   | c.172G>A    | Verified   | ATC | GTG | GGA | 1 | G | A |
| TCGA-09-0369 | ITGAX      | ENST00000268296 | p.T339T  | c.1017G>A   | Verified   | ggt | acg | gag | 3 | G | A |
| TCGA-09-0369 | ITGAX      | ENST00000268296 | p.T339T  | c.1017G>A   | Verified   | ggt | acg | gag | 3 | G | A |
| TCGA-24-2290 | ITGB2      | ENST00000397852 | p.V439V  | c.1317G>A   | Verified   | ACC | GTG | CAG | 3 | G | A |
| TCGA-24-2290 | ITGB2      | ENST00000397852 | p.V439V  | c.1317G>A   | Verified   | ACC | GTG | CAG | 3 | G | A |
| TCGA-13-0923 | ITGB7      | ENST00000422257 | p.V185I  | c.553G>A    | Verified   | gaa | gtc | acc | 1 | G | A |
| TCGA-04-1542 | ITGBL1     | ENST00000376180 | p.K114K  | c.342G>A    | Verified   | GGC | AAG | TGC | 3 | G | A |
| TCGA-24-1843 | ITIH5L     | ENST00000218436 | p.T401T  | c.1203G>A   | Unverified | ccc | acg | gcc | 3 | G | A |
| TCGA-24-1103 | ITK        | ENST00000422843 | p.P79P   | c.237G>A    | Verified   | TAC | CCG | TTT | 3 | G | A |
| TCGA-13-0887 | ITPKB      | NM_002221       | p.A306T  | c.916G>A    | Verified   | gag | gcc | ccc | 1 | G | A |
| TCGA-24-1604 | ITPR1      | ENST00000456211 | p.G2303S | c.6907G>A   | Unverified | CTG | GGC | GCT | 1 | G | A |
| TCGA-29-1781 | ITPR3      | ENST00000374316 | p.E410K  | c.1228G>A   | Unverified | GAG | GAG | CGG | 1 | G | A |
| TCGA-29-1781 | ITPR3_ENST | ENST00000374316 | p.E410K  | c.1228G>A   | Unverified | GAG | GAG | CGG | 1 | G | A |
| TCGA-13-1481 | ITSN2      | ENST00000355123 | p.A1410A | c.4230G>A   | Unverified | CAG | GCG | CAC | 3 | G | A |
| TCGA-24-2267 | IVL        | ENST00000368764 | p.P176P  | c.528G>A    | Verified   | CAC | CCG | GAG | 3 | G | A |
| TCGA-61-1904 | IZUMO1     | ENST00000332955 | p.R232H  | c.695G>A    | Unverified | TAC | CGC | TGC | 2 | G | A |
| TCGA-20-0991 | JAG1       | ENST00000254958 | p.A959A  | c.2877G>A   | Verified   | TGT | GCG | AAC | 3 | G | A |
| TCGA-13-0919 | JAGN1      | ENST00000307768 | p.P77P   | c.231G>A    | Verified   | TAC | CCG | TAT | 3 | G | A |

|              |           |                     |          |             |            |     |     |     |   |   |   |
|--------------|-----------|---------------------|----------|-------------|------------|-----|-----|-----|---|---|---|
| TCGA-20-0991 | JAKMIP1   | ENST00000282924     | p.E296K  | c.886G>A    | Verified   | gct | gaa | ctg | 1 | G | A |
| TCGA-23-1124 | JHDM1D    | ENST00000397560     | p.D686N  | c.2056G>A   | Verified   | GGT | GAT | GAA | 1 | G | A |
| TCGA-20-1683 | KALRN     | ENST00000240874     | p.G1549E | c.4646G>A   | Unverified | TCT | GGG | CGC | 2 | G | A |
| TCGA-20-1683 | KALRN_ENS | ENST00000360013     | p.G1549E | c.4646G>A   | Unverified | TCT | GGG | CGC | 2 | G | A |
| TCGA-13-1505 | KANK1     | ENST00000382293     | p.G471D  | c.1412G>A   | Verified   | ATC | GGT | TGT | 2 | G | A |
| TCGA-13-1489 | KARS      | ENST00000302445     | p.A498A  | c.1494G>A   | Verified   | AAT | GCG | TAT | 3 | G | A |
| TCGA-23-1029 | KBTBD5    | ENST00000287777     | p.E222K  | c.664G>A    | Unverified | TTC | GAG | AGC | 1 | G | A |
| TCGA-23-1111 | KBTBD6    | ENST00000379485     | p.R421H  | c.1262G>A   | Unverified | GAT | CGC | TTG | 2 | G | A |
| TCGA-13-0919 | KCNA1     | ENST00000382545     | p.M175I  | c.525G>A    | Verified   | GTC | ATG | GTC | 3 | G | A |
| TCGA-13-0791 | KCNA3     | ENST00000369769     | p.A267T  | c.799G>A    | Verified   | CCC | GCC | TCG | 1 | G | A |
| TCGA-13-0885 | KCNA3     | ENST00000369769     | p.G468S  | c.1402G>A   | Verified   | GCC | GGT | GTC | 1 | G | A |
| TCGA-23-1117 | KCNA3     | ENST00000369769     | p.D293N  | c.877G>A    | Verified   | TCC | GAT | CCC | 1 | G | A |
| TCGA-23-1117 | KCNA3     | ENST00000369769     | p.D293N  | c.877G>A    | Verified   | TCC | GAT | CCC | 1 | G | A |
| TCGA-23-1114 | KCNA4     | ENST00000328224     | p.G138E  | c.413G>A    | Unverified | GAG | GGA | AGG | 2 | G | A |
| TCGA-09-1674 | KCNA5     | ENST00000252321     | p.G384R  | c.1150G>A   | Unverified | ggt | gga | gga | 1 | G | A |
| TCGA-23-1110 | KCNA5     | ENST00000252321     | p.M210I  | c.630G>A    | Unverified | gcc | atg | gag | 3 | G | A |
| TCGA-61-1899 | KCNAB1    | ENST00000302490     | p.W142*  | c.425G>A    | Unverified | GGC | TGG | AGG | 2 | G | A |
| TCGA-13-1507 | KCNAB1    | ENST00000302490     | p.M71I   | c.213G>A    | Verified   | GGC | ATG | AAA | 3 | G | A |
| TCGA-24-1604 | KCNAB1    | ENST00000302490     | p.L301L  | c.903G>A    | Verified   | TCA | CTG | AAG | 3 | G | A |
| TCGA-61-1899 | KCNAB1_EN | ENST00000471742     | p.W149*  | c.446G>A    | Unverified | GGC | TGG | AGG | 2 | G | A |
| TCGA-61-1899 | KCNAB1_EN | ENST00000490337     | p.W160*  | c.479G>A    | Unverified | GGC | TGG | AGG | 2 | G | A |
| TCGA-61-1733 | KCNAB2    | ENST00000164247     | p.R48Q   | c.143G>A    | Unverified | CTG | CGG | GTC | 2 | G | A |
| TCGA-61-1733 | KCNAB2    | ENST00000164247     | p.R48Q   | c.143G>A    | Unverified | CTG | CGG | GTC | 2 | G | A |
| TCGA-29-1763 | KCNC1     | ENST00000379472     | p.T410T  | c.1230G>A   | Unverified | CAG | ACG | TGG | 3 | G | A |
| TCGA-29-1763 | KCNC1_ENS | ENST00000265969_v68 | p.T410T  | c.1230G>A   | Unverified | CAG | ACG | TGG | 3 | G | A |
| TCGA-61-2095 | KCNE4     | ENST00000281830     | p.E35K   | c.103G>A    | Unverified | AAC | GAG | TAC | 1 | G | A |
| TCGA-23-1022 | KCNH1     | ENST00000271751     | p.P733P  | c.2199G>A   | Verified   | CCC | CCG | GAC | 3 | G | A |
| TCGA-04-1347 | KCNH2     | ENST00000262186     | p.D383N  | c.1147G>A   | Verified   | GCC | GAC | GTG | 1 | G | A |
| TCGA-24-1850 | KCNH5     | ENST00000322893     | p.V752M  | c.2254G>A   | Unverified | AGC | GTG | GTG | 1 | G | A |
| TCGA-29-1695 | KCNH7     | ENST00000332142     | p.?      | c.3131+1G>A | Unverified | AAC | AGG | CTT | 2 | G | A |
| TCGA-30-1718 | KCNJ12    | ENST00000331718     | p.R43H   | c.128G>A    | Unverified | TGC | CGC | AAC | 2 | G | A |
| TCGA-23-1122 | KCNK10    | ENST00000340700     | p.P428P  | c.1284G>A   | Verified   | GGG | CCG | GAG | 3 | G | A |
| TCGA-29-1769 | KCNK17    | ENST00000373231     | p.A89T   | c.265G>A    | Unverified | gga | gcc | agc | 1 | G | A |
| TCGA-29-1769 | KCNK17_EN | ENST00000453413     | p.A89T   | c.265G>A    | Unverified | GGA | GCC | AGC | 1 | G | A |



|              |            |                 |          |             |            |     |     |     |   |   |   |
|--------------|------------|-----------------|----------|-------------|------------|-----|-----|-----|---|---|---|
| TCGA-24-1474 | KCNN4      | ENST00000262888 | p.E45K   | c.133G>A    | Verified   | GCA | GAG | ATG | 1 | G | A |
| TCGA-24-1616 | KCNQ5      | ENST00000370398 | p.V276I  | c.826G>A    | Verified   | TTG | GTT | CTT | 1 | G | A |
| TCGA-30-1856 | KCNQ5      | ENST00000370398 | p.A227T  | c.679G>A    | Unverified | TTT | GCC | ACG | 1 | G | A |
| TCGA-13-1481 | KCNT2      | ENST00000294725 | p.?      | c.1294+1G>A | Verified   | GCT | GAT | CAT | 1 | G | A |
| TCGA-61-2009 | KCTD14     | ENST00000353172 | p.V39I   | c.115G>A    | Verified   | AAC | GTC | GGG | 1 | G | A |
| TCGA-25-2391 | KCTD16     | ENST00000512467 | p.R191Q  | c.572G>A    | Unverified | CCC | CGG | ATT | 2 | G | A |
| TCGA-24-1616 | KCTD7      | ENST00000275532 | p.R177H  | c.530G>A    | Verified   | CTG | CGT | GCG | 2 | G | A |
| TCGA-61-1915 | KDM2A      | ENST00000529006 | p.D1070N | c.3208G>A   | Unverified | ctc | gac | ctc | 1 | G | A |
| TCGA-20-1686 | KDM4C      | ENST00000381309 | p.S678S  | c.2034G>A   | Unverified | ACA | TCG | GAG | 3 | G | A |
| TCGA-20-1686 | KDM4C_ENS  | ENST00000381306 | p.S678S  | c.2034G>A   | Unverified | ACA | TCG | GAG | 3 | G | A |
| TCGA-04-1331 | KDM5C      | ENST00000375401 | p.G912E  | c.2735G>A   | Verified   | CTG | GGG | GTG | 2 | G | A |
| TCGA-13-0900 | KEL        | ENST00000355265 | p.D226N  | c.676G>A    | Verified   | ATA | GAC | CAG | 1 | G | A |
| TCGA-13-1501 | KHDRBS1    | ENST00000327300 | p.E384K  | c.1150G>A   | Verified   | tac | gaa | ggc | 1 | G | A |
| TCGA-13-1501 | KHDRBS1    | ENST00000327300 | p.E384K  | c.1150G>A   | Verified   | tac | gaa | ggc | 1 | G | A |
| TCGA-13-0924 | KHDRBS3    | ENST00000355849 | p.D285N  | c.853G>A    | Verified   | TAT | GAT | TCC | 1 | G | A |
| TCGA-29-1781 | KIAA0141   | ENST00000194118 | p.S453N  | c.1358G>A   | Unverified | TCC | AGC | CCC | 2 | G | A |
| TCGA-29-1703 | KIAA0146   | ENST00000297423 | p.G374E  | c.1121G>A   | Unverified | AGT | GGA | AGT | 2 | G | A |
| TCGA-13-0893 | KIAA0195   | ENST00000314256 | p.V373I  | c.1117G>A   | Verified   | GCT | GTC | TCC | 1 | G | A |
| TCGA-13-1408 | KIAA0226   | ENST00000296343 | p.?      | c.2127-1G>A | Unverified | CCA | ACG | AGG | 3 | G | A |
| TCGA-13-1408 | KIAA0226_E | ENST00000273582 | p.?      | c.1992-1G>A | Unverified | CCA | ACG | AGG | 3 | G | A |
| TCGA-61-1910 | KIAA0317   | ENST00000356357 | p.R667Q  | c.2000G>A   | Unverified | TAT | CGG | CTG | 2 | G | A |
| TCGA-13-1510 | KIAA0408   | ENST00000483725 | p.R434K  | c.1301G>A   | Unverified | ACA | AGG | AAT | 2 | G | A |
| TCGA-09-0369 | KIAA0467_E | ENST00000372442 | p.V704I  | c.2110G>A   | Verified   | CCA | GTT | GGA | 1 | G | A |
| TCGA-09-0369 | KIAA0467_E | ENST00000372442 | p.V704I  | c.2110G>A   | Verified   | CCA | GTT | GGA | 1 | G | A |
| TCGA-29-2427 | KIAA0467_E | ENST00000372442 | p.R995R  | c.2985G>A   | Verified   | TTG | CGG | ACT | 3 | G | A |
| TCGA-24-2289 | KIAA0746   | ENST00000399878 | p.A360T  | c.1078G>A   | Unverified | CAG | GCA | TTG | 1 | G | A |
| TCGA-24-2262 | KIAA0889   | ENST00000237536 | p.E520K  | c.1558G>A   | Unverified | GTC | GAA | GAG | 1 | G | A |
| TCGA-23-1116 | KIAA0913_E | ENST00000412131 | p.V885M  | c.2653G>A   | Unverified | GAG | GTG | GCT | 1 | G | A |
| TCGA-20-1683 | KIAA0930   | ENST00000251993 | p.K117K  | c.351G>A    | Unverified | CAG | AAG | CTG | 3 | G | A |
| TCGA-09-2044 | KIAA0947   | ENST00000296564 | p.D376N  | c.1126G>A   | Verified   | ACA | GAT | TCC | 1 | G | A |
| TCGA-23-1120 | KIAA1109   | ENST00000264501 | p.M387I  | c.1161G>A   | Verified   | CGA | ATG | AAT | 3 | G | A |
| TCGA-04-1343 | KIAA1210   | XM_172801.3     | p.G389D  | c.1166G>A   | Verified   | tat | ggc | ctg | 2 | G | A |
| TCGA-30-1855 | KIAA1211   | ENST00000264229 | p.R1199R | c.3597G>A   | Unverified | AAG | AGG | TTT | 3 | G | A |
| TCGA-13-1488 | KIAA1279   | ENST00000361983 | p.L620L  | c.1860G>A   | Verified   | GCC | CTG | ACT | 3 | G | A |

|              |            |                 |          |           |            |     |     |     |   |   |   |
|--------------|------------|-----------------|----------|-----------|------------|-----|-----|-----|---|---|---|
| TCGA-09-1665 | KIAA1324L  | ENST00000297222 | p.R137Q  | c.410G>A  | Verified   | TGC | CGG | GAG | 2 | G | A |
| TCGA-23-1031 | KIAA1324L  | ENST00000297222 | p.S478N  | c.1433G>A | Verified   | ATC | AGT | TTA | 2 | G | A |
| TCGA-24-1845 | KIAA1370   | ENST00000261844 | p.G303D  | c.908G>A  | Unverified | CCA | GGC | ACT | 2 | G | A |
| TCGA-13-1496 | KIAA1377   | ENST00000263468 | p.R120H  | c.359G>A  | Verified   | CAG | CGT | GCC | 2 | G | A |
| TCGA-24-1850 | KIAA1462   | ENST00000375377 | p.E239K  | c.715G>A  | Unverified | CCC | GAG | AGC | 1 | G | A |
| TCGA-23-1123 | KIAA1462   | ENST00000375377 | p.P1101P | c.3303G>A | Verified   | CTG | CCG | GGC | 3 | G | A |
| TCGA-23-1123 | KIAA1462   | ENST00000375377 | p.P1101P | c.3303G>A | Verified   | CTG | CCG | GGC | 3 | G | A |
| TCGA-61-2109 | KIAA1509   | ENST00000331194 | p.R93Q   | c.278G>A  | Unverified | TCG | CGG | CCA | 2 | G | A |
| TCGA-25-1326 | KIAA1755   | ENST00000279024 | p.E113K  | c.337G>A  | Verified   | CAG | GAG | GAG | 1 | G | A |
| TCGA-23-1122 | KIAA1797   | ENST00000380249 | p.G1369D | c.4106G>A | Verified   | ATT | GGC | TTC | 2 | G | A |
| TCGA-24-1850 | KIAA2018   | ENST00000316407 | p.R1991H | c.5972G>A | Unverified | ATT | CGT | CAG | 2 | G | A |
| TCGA-61-2095 | KIAA2018   | ENST00000316407 | p.A1258A | c.3774G>A | Unverified | TGT | GCG | GGT | 3 | G | A |
| TCGA-24-1464 | KIAA2022   | ENST00000373468 | p.G22G   | c.66G>A   | Verified   | aat | ggg | gtc | 3 | G | A |
| TCGA-29-1702 | KIF18B     | ENST00000339151 | p.R509Q  | c.1526G>A | Unverified | GCA | CGG | GAA | 2 | G | A |
| TCGA-20-1685 | KIF19      | ENST00000389916 | p.V926M  | c.2776G>A | Unverified | CCA | GTG | TGC | 1 | G | A |
| TCGA-13-1498 | KIF21A     | ENST00000361961 | p.C1383Y | c.4148G>A | Verified   | TAC | TGT | AAT | 2 | G | A |
| TCGA-13-1509 | KIF26B     | ENST00000407071 | p.R2024H | c.6071G>A | Verified   | CAC | CGC | CAG | 2 | G | A |
| TCGA-23-1116 | KIF3C      | ENST00000264712 | p.K103K  | c.309G>A  | Unverified | GGC | AAG | ACC | 3 | G | A |
| TCGA-13-1488 | KIF4B      | ENST00000435029 | p.R233H  | c.698G>A  | Verified   | TTT | CGC | TCC | 2 | G | A |
| TCGA-24-1464 | KIF5B      | ENST00000302418 | p.E75K   | c.223G>A  | Verified   | CTT | GAA | GGA | 1 | G | A |
| TCGA-61-1899 | KIFC1      | ENST00000428849 | p.E645K  | c.1933G>A | Unverified | GAA | GAG | AAC | 1 | G | A |
| TCGA-04-1336 | KIFC2      | ENST00000301332 | p.S133N  | c.398G>A  | Verified   | CGA | AGC | CCC | 2 | G | A |
| TCGA-25-1313 | KIFC3      | ENST00000379655 | p.R451H  | c.1352G>A | Verified   | GCT | CGT | GTC | 2 | G | A |
| TCGA-30-1855 | KIR3DL1_EN | ENST00000391728 | p.R166H  | c.497G>A  | Unverified | TCA | CGC | CTC | 2 | G | A |
| TCGA-30-1855 | KIR3DL1_EN | ENST00000402254 | p.R166H  | c.497G>A  | Unverified | TCA | CGC | CTC | 2 | G | A |
| TCGA-24-0975 | KIRREL2    | ENST00000360202 | p.C652Y  | c.1955G>A | Unverified | CCC | TGC | AGA | 2 | G | A |
| TCGA-24-2267 | KIT        | ENST00000288135 | p.G961S  | c.2881G>A | Verified   | gtc | ggc | agc | 1 | G | A |
| TCGA-29-1702 | KIT        | ENST00000288135 | p.R49H   | c.146G>A  | Unverified | gtc | cgc | gtg | 2 | G | A |
| TCGA-29-1762 | KLB        | ENST00000257408 | p.C319Y  | c.956G>A  | Unverified | AAA | TGT | CAA | 2 | G | A |
| TCGA-23-1122 | KLF11      | ENST00000305883 | p.C21Y   | c.62G>A   | Verified   | ATA | TGT | GAG | 2 | G | A |
| TCGA-09-2049 | KLF8       | ENST00000468660 | p.A61T   | c.181G>A  | Verified   | CCA | GCA | CTG | 1 | G | A |
| TCGA-23-1032 | KLHDC2     | ENST00000298307 | p.G162G  | c.486G>A  | Verified   | GGA | GGG | TAT | 3 | G | A |
| TCGA-29-1775 | KLHDC7A    | ENST00000400664 | p.V764I  | c.2290G>A | Unverified | ACC | GTC | CTG | 1 | G | A |
| TCGA-23-1032 | KLHL11     | ENST00000319121 | p.R686K  | c.2057G>A | Unverified | ATC | AGA | CAG | 2 | G | A |

|              |           |                 |          |            |            |     |     |     |   |   |   |
|--------------|-----------|-----------------|----------|------------|------------|-----|-----|-----|---|---|---|
| TCGA-13-0885 | KLHL15    | ENST00000328046 | p.W570*  | c.1709G>A  | Verified   | aag | tgg | aag | 2 | G | A |
| TCGA-13-1509 | KLHL26    | ENST00000300976 | p.R278H  | c.833G>A   | Verified   | TGC | CGC | CAG | 2 | G | A |
| TCGA-29-1768 | KLHL31    | ENST00000370905 | p.G365E  | c.1094G>A  | Unverified | GAT | GGA | TTT | 2 | G | A |
| TCGA-29-1695 | KLHL6     | ENST00000341319 | p.V78V   | c.234G>A   | Unverified | TGT | GTG | GAC | 3 | G | A |
| TCGA-09-1674 | KLRAQ1    | ENST00000281394 | p.E366K  | c.1096G>A  | Unverified | GAA | GAA | GAA | 1 | G | A |
| TCGA-13-0761 | KNTC1     | ENST00000333479 | p.V515V  | c.1545G>A  | Verified   | gag | gtg | cta | 3 | G | A |
| TCGA-13-0761 | KNTC1     | ENST00000333479 | p.V515V  | c.1545G>A  | Verified   | gag | gtg | cta | 3 | G | A |
| TCGA-61-1899 | KPNA3     | ENST00000261667 | p.R218Q  | c.653G>A   | Unverified | ctt | cgg | aac | 2 | G | A |
| TCGA-61-2109 | KPRP      | ENST00000368773 | p.R496H  | c.1487G>A  | Unverified | TGG | CGC | AGC | 2 | G | A |
| TCGA-24-1469 | KRT14     | ENST00000167586 | p.Q348Q  | c.1044G>A  | Verified   | TCC | CAG | CTC | 3 | G | A |
| TCGA-30-1855 | KRT2      | ENST00000309680 | p.V174V  | c.522G>A   | Unverified | AAT | GTG | AAG | 3 | G | A |
| TCGA-29-1698 | KRT3      | ENST00000417996 | p.G127G  | c.381G>A   | Unverified | GGA | GGG | GCT | 3 | G | A |
| TCGA-29-1766 | KRT4      | ENST00000293774 | p.T364T  | c.1092G>A  | Unverified | GAC | ACG | TCC | 3 | G | A |
| TCGA-04-1331 | KRT6A     | ENST00000330722 | p.R260H  | c.779G>A   | Verified   | AAG | CGC | ACA | 2 | G | A |
| TCGA-61-1738 | KRT76     | ENST00000332411 | p.G153G  | c.459G>A   | Unverified | CCT | GGG | GGA | 3 | G | A |
| TCGA-61-1738 | KRT76     | ENST00000332411 | p.G153G  | c.459G>A   | Unverified | CCT | GGG | GGA | 3 | G | A |
| TCGA-20-0990 | KRTAP26-1 | ENST00000360542 | p.R172H  | c.515G>A   | Verified   | TAT | CGT | CCT | 2 | G | A |
| TCGA-09-1674 | KSR2      | SU_KSR2         | p.P320P  | c.960G>A   | Unverified | ccc | ccg | ggg | 3 | G | A |
| TCGA-09-1665 | KTN1      | ENST00000395309 | p.M554I  | c.1662G>A  | Unverified | TTA | ATG | GAA | 3 | G | A |
| TCGA-04-1342 | L1CAM     | ENST00000370060 | p.W1078* | c.3234G>A  | Verified   | CAG | TGG | GAC | 3 | G | A |
| TCGA-04-1356 | L1CAM     | ENST00000370060 | p.T851T  | c.2553G>A  | Unverified | GTG | ACG | TAC | 3 | G | A |
| TCGA-29-1775 | LAD1      | ENST00000391967 | p.D510N  | c.1528G>A  | Unverified | TCT | GAC | TCC | 1 | G | A |
| TCGA-13-0885 | LAMA1     | ENST00000389658 | p.R1490K | c.4469G>A  | Verified   | GAA | AGG | TGC | 2 | G | A |
| TCGA-29-1711 | LAMA1     | ENST00000389658 | p.R729H  | c.2186G>A  | Unverified | TAC | CGC | GTG | 2 | G | A |
| TCGA-29-1711 | LAMA1     | ENST00000389658 | p.R729H  | c.2186G>A  | Unverified | TAC | CGC | GTG | 2 | G | A |
| TCGA-13-1509 | LAMA2     | ENST00000421865 | p.E1738K | c.5212G>A  | Verified   | AAG | GAA | ATT | 1 | G | A |
| TCGA-13-1497 | LAMA3     | ENST00000313654 | p.R1579Q | c.4736G>A  | Verified   | gac | cgg | ctg | 2 | G | A |
| TCGA-23-1032 | LAMA3     | ENST00000313654 | p.R200Q  | c.599G>A   | Verified   | ggg | cgg | gag | 2 | G | A |
| TCGA-24-0979 | LAMA3     | ENST00000313654 | p.C1465Y | c.4394G>A  | Verified   | caa | tgt | cac | 2 | G | A |
| TCGA-04-1638 | LAMA5     | ENST00000252999 | p.G3685R | c.11053G>A | Unverified | CAC | GGG | GCA | 1 | G | A |
| TCGA-04-1342 | LAMB2     | ENST00000305544 | p.E1264K | c.3790G>A  | Unverified | GAG | GAG | CTG | 1 | G | A |
| TCGA-09-0369 | LAMC3     | ENST00000361069 | p.G814R  | c.2440G>A  | Verified   | AGC | GGG | AAC | 1 | G | A |
| TCGA-09-0369 | LAMC3     | ENST00000361069 | p.G814R  | c.2440G>A  | Verified   | AGC | GGG | AAC | 1 | G | A |
| TCGA-04-1338 | LARP1     | ENST00000377643 | p.E412K  | c.1234G>A  | Verified   | ATT | GAA | TAC | 1 | G | A |

|              |            |                 |         |           |            |     |     |     |   |   |   |
|--------------|------------|-----------------|---------|-----------|------------|-----|-----|-----|---|---|---|
| TCGA-24-1469 | LARP4B     | ENST00000316157 | p.R307Q | c.920G>A  | Verified   | GCA | CGG | ATA | 2 | G | A |
| TCGA-25-2392 | LARP7      | ENST00000324052 | p.G420R | c.1258G>A | Verified   | AGT | GGA | GTA | 1 | G | A |
| TCGA-20-0991 | LARP7      | ENST00000324052 | p.R435R | c.1305G>A | Verified   | AAC | AGG | GAA | 3 | G | A |
| TCGA-09-0369 | LASS3      | ENST00000284382 | p.D239N | c.715G>A  | Verified   | CAC | GAT | GTG | 1 | G | A |
| TCGA-09-0369 | LASS3      | ENST00000284382 | p.D239N | c.715G>A  | Verified   | CAC | GAT | GTG | 1 | G | A |
| TCGA-13-0760 | LCE3E      | ENST00000368789 | p.G76D  | c.227G>A  | Verified   | AGT | GGT | CAG | 2 | G | A |
| TCGA-24-1422 | LCTL       | ENST00000341509 | p.D305N | c.913G>A  | Verified   | AAG | GAC | TAC | 1 | G | A |
| TCGA-20-0991 | LDB3       | ENST00000361373 | p.R533K | c.1598G>A | Unverified | GCC | AGG | GGG | 2 | G | A |
| TCGA-29-1698 | LDB3_ENSTC | ENST00000372056 | p.E254K | c.760G>A  | Unverified | ATC | GAG | GTG | 1 | G | A |
| TCGA-29-1698 | LDB3_ENSTC | ENST00000429277 | p.E254K | c.760G>A  | Unverified | ATC | GAG | GTG | 1 | G | A |
| TCGA-04-1342 | LEPRE1     | ENST00000236040 | p.D623N | c.1867G>A | Verified   | TTC | GAT | GGC | 1 | G | A |
| TCGA-61-1900 | LEPREL4    | ENST00000355468 | p.G218R | c.652G>A  | Unverified | AGC | GGG | GAT | 1 | G | A |
| TCGA-24-1845 | LHB        | ENST00000221421 | p.P93P  | c.279G>A  | Unverified | TGC | CCG | CGT | 3 | G | A |
| TCGA-24-1435 | LHCGR      | ENST00000294954 | p.D405N | c.1213G>A | Verified   | GCA | GAC | TTT | 1 | G | A |
| TCGA-29-1770 | LHFPL3     | ENST00000535008 | p.W60*  | c.180G>A  | Unverified | TAC | TGG | ATA | 3 | G | A |
| TCGA-23-1031 | LHFPL4     | ENST00000287585 | p.T163T | c.489G>A  | Unverified | AAG | ACG | GGG | 3 | G | A |
| TCGA-10-0930 | LILRB4     | ENST00000391736 | p.A173T | c.517G>A  | Verified   | GGA | GCT | CAG | 1 | G | A |
| TCGA-10-0930 | LILRB4     | ENST00000391736 | p.A173T | c.517G>A  | Verified   | GGA | GCT | CAG | 1 | G | A |
| TCGA-61-1899 | LILRB4     | ENST00000391736 | p.V333M | c.997G>A  | Unverified | GCC | GTG | AAG | 1 | G | A |
| TCGA-20-0991 | LIPG       | ENST00000261292 | p.A83T  | c.247G>A  | Verified   | ACA | GCT | AAA | 1 | G | A |
| TCGA-09-2051 | LIPI       | ENST00000344577 | p.G253E | c.758G>A  | Unverified | GGA | GGA | AAT | 2 | G | A |
| TCGA-24-1417 | LIX1       | ENST00000274382 | p.R186Q | c.557G>A  | Verified   | TCC | CGA | CAG | 2 | G | A |
| TCGA-09-2051 | LLOXNC01-2 | ENST00000218249 | p.K188K | c.564G>A  | Unverified | agc | aag | gta | 3 | G | A |
| TCGA-23-1032 | LMF1       | ENST00000262301 | p.E274K | c.820G>A  | Unverified | ATC | GAG | CTC | 1 | G | A |
| TCGA-61-1895 | LMO7       | ENST00000341547 | p.R522H | c.1565G>A | Unverified | GAC | CGT | GTA | 2 | G | A |
| TCGA-61-1895 | LMO7_ENST  | ENST00000357063 | p.R856H | c.2567G>A | Unverified | GAC | CGT | GTA | 2 | G | A |
| TCGA-61-1895 | LMO7_ENST  | ENST00000465261 | p.R571H | c.1712G>A | Unverified | GAC | CGT | GTA | 2 | G | A |
| TCGA-13-1509 | LMOD1      | ENST00000367288 | p.E311K | c.931G>A  | Verified   | GAG | GAG | GAG | 1 | G | A |
| TCGA-24-2035 | LMOD3      | ENST00000420581 | p.A560A | c.1680G>A | Verified   | CTG | GCG | TAA | 3 | G | A |
| TCGA-23-1114 | LOC223075  | ENST00000319386 | p.Q63Q  | c.189G>A  | Unverified | ATT | CAG | CAG | 3 | G | A |
| TCGA-20-1687 | LOC340578  | ENST00000360028 | p.S390N | c.1169G>A | Unverified | TCC | AGC | CTG | 2 | G | A |
| TCGA-29-1696 | LOC340578  | ENST00000360028 | p.R337H | c.1010G>A | Unverified | CAG | CGC | CAG | 2 | G | A |
| TCGA-29-1696 | LOC340578  | ENST00000360028 | p.R337H | c.1010G>A | Unverified | CAG | CGC | CAG | 2 | G | A |
| TCGA-23-1117 | LOC51058   | ENST00000397034 | p.E46K  | c.136G>A  | Verified   | CCT | GAG | GAA | 1 | G | A |

|              |           |                 |          |            |            |     |     |     |   |   |   |
|--------------|-----------|-----------------|----------|------------|------------|-----|-----|-----|---|---|---|
| TCGA-23-1117 | LOC51058  | ENST00000397034 | p.E46K   | c.136G>A   | Verified   | CCT | GAG | GAA | 1 | G | A |
| TCGA-13-1408 | LOC645864 | ENST00000329538 | p.V297I  | c.889G>A   | Verified   | ACC | GTT | GCC | 1 | G | A |
| TCGA-61-1913 | LOC645864 | ENST00000329538 | p.R268H  | c.803G>A   | Unverified | CCA | CGC | TAC | 2 | G | A |
| TCGA-29-1705 | LOC65121  | ENST00000332296 | p.P464P  | c.1392G>A  | Unverified | TCA | CCG | TCT | 3 | G | A |
| TCGA-24-1844 | LOC652153 | ENST00000316490 | p.A3730T | c.11188G>A | Unverified | CCT | GCT | CAC | 1 | G | A |
| TCGA-61-1914 | LOC652153 | ENST00000316490 | p.E3082K | c.9244G>A  | Unverified | ATT | GAG | CAC | 1 | G | A |
| TCGA-13-0762 | LOC652153 | ENST00000316490 | p.G3848E | c.11543G>A | Unverified | TCG | GGA | ATC | 2 | G | A |
| TCGA-13-0762 | LOC652153 | ENST00000316490 | p.G3848E | c.11543G>A | Unverified | TCG | GGA | ATC | 2 | G | A |
| TCGA-61-1738 | LOC652153 | ENST00000316490 | p.R3916H | c.11747G>A | Unverified | CAG | CGC | AAC | 2 | G | A |
| TCGA-61-1738 | LOC652153 | ENST00000316490 | p.R3916H | c.11747G>A | Unverified | CAG | CGC | AAC | 2 | G | A |
| TCGA-25-1318 | LOC652153 | ENST00000316490 | p.M994I  | c.2982G>A  | Unverified | AGC | ATG | GAG | 3 | G | A |
| TCGA-25-1318 | LOC652153 | ENST00000316490 | p.M994I  | c.2982G>A  | Unverified | AGC | ATG | GAG | 3 | G | A |
| TCGA-13-0714 | LOC728194 | ENST00000404077 | p.A679T  | c.2035G>A  | Unverified | AGC | GCG | GTC | 1 | G | A |
| TCGA-29-1690 | LOC728194 | ENST00000404077 | p.R92H   | c.275G>A   | Unverified | GTT | CGT | GGG | 2 | G | A |
| TCGA-04-1343 | LOXL2     | ENST00000389131 | p.G155S  | c.463G>A   | Verified   | gtc | ggt | gtg | 1 | G | A |
| TCGA-30-1857 | LOXL2     | ENST00000389131 | p.A519A  | c.1557G>A  | Unverified | ctg | gcg | cac | 3 | G | A |
| TCGA-04-1638 | LOXL3     | ENST00000264094 | p.A458T  | c.1372G>A  | Unverified | gtg | gcc | tgt | 1 | G | A |
| TCGA-24-1423 | LOXL4     | ENST00000260702 | p.G316R  | c.946G>A   | Unverified | tcc | ggg | gcc | 1 | G | A |
| TCGA-29-2427 | LPA       | ENST00000316300 | p.R1614Q | c.4841G>A  | Verified   | GTC | CGG | CAG | 2 | G | A |
| TCGA-23-1022 | LPAR4     | ENST00000435339 | p.R195H  | c.584G>A   | Verified   | aaa | cgt | gtc | 2 | G | A |
| TCGA-36-1577 | LRBA      | ENST00000357115 | p.R2732K | c.8195G>A  | Unverified | TTG | AGG | ACC | 2 | G | A |
| TCGA-61-1904 | LRCH4     | ENST00000310300 | p.G456S  | c.1366G>A  | Unverified | AAC | GGC | TCG | 1 | G | A |
| TCGA-10-0930 | LRG1      | ENST00000306390 | p.V275M  | c.823G>A   | Verified   | AGC | GTG | CCC | 1 | G | A |
| TCGA-10-0930 | LRG1      | ENST00000306390 | p.V275M  | c.823G>A   | Verified   | AGC | GTG | CCC | 1 | G | A |
| TCGA-25-2392 | LRMP      | ENST00000354454 | p.R345K  | c.1034G>A  | Verified   | aga | agg | tca | 2 | G | A |
| TCGA-24-1422 | LRP1      | ENST00000243077 | p.A2633T | c.7897G>A  | Verified   | GAC | GCC | TCA | 1 | G | A |
| TCGA-29-1785 | LRP1      | ENST00000243077 | p.W2348* | c.7044G>A  | Unverified | TTC | TGG | ACC | 3 | G | A |
| TCGA-29-1785 | LRP1      | ENST00000243077 | p.W2348* | c.7044G>A  | Unverified | TTC | TGG | ACC | 3 | G | A |
| TCGA-36-1577 | LRP10     | ENST00000359591 | p.G110S  | c.328G>A   | Unverified | GGG | GGC | AAC | 1 | G | A |
| TCGA-04-1343 | LRP1B     | ENST00000389484 | p.G2937R | c.8809G>A  | Verified   | AGT | GGA | TGT | 1 | G | A |
| TCGA-24-1435 | LRP1B     | ENST00000389484 | p.C2158Y | c.6473G>A  | Verified   | CTC | TGT | CTT | 2 | G | A |
| TCGA-25-2400 | LRP1B     | ENST00000389484 | p.C3572Y | c.10715G>A | Unverified | AAA | TGT | GAT | 2 | G | A |
| TCGA-04-1331 | LRP2      | ENST00000263816 | p.V263I  | c.787G>A   | Verified   | GAT | GTT | CAT | 1 | G | A |
| TCGA-04-1343 | LRP2      | ENST00000263816 | p.R3043H | c.9128G>A  | Verified   | GGG | CGC | TGC | 2 | G | A |

|              |            |                 |          |           |            |     |     |     |   |   |   |
|--------------|------------|-----------------|----------|-----------|------------|-----|-----|-----|---|---|---|
| TCGA-61-1738 | LRP4       | ENST00000378623 | p.D1229N | c.3685G>A | Unverified | GCC | GAT | GCC | 1 | G | A |
| TCGA-61-1738 | LRP4       | ENST00000378623 | p.D1229N | c.3685G>A | Unverified | GCC | GAT | GCC | 1 | G | A |
| TCGA-24-2262 | LRPPRC     | ENST00000260665 | p.L771L  | c.2313G>A | Verified   | ATT | CTG | AAG | 3 | G | A |
| TCGA-23-1021 | LRRC15     | ENST00000347624 | p.R98Q   | c.293G>A  | Verified   | TTC | CGA | AAC | 2 | G | A |
| TCGA-25-2392 | LRRC18     | ENST00000374160 | p.G112G  | c.336G>A  | Unverified | AAC | GGG | CTG | 3 | G | A |
| TCGA-04-1652 | LRRC2      | ENST00000296144 | p.R235Q  | c.704G>A  | Unverified | CTG | CGG | ATG | 2 | G | A |
| TCGA-04-1652 | LRRC2      | ENST00000296144 | p.R235Q  | c.704G>A  | Unverified | CTG | CGG | ATG | 2 | G | A |
| TCGA-10-0930 | LRRC2      | ENST00000296144 | p.R335Q  | c.1004G>A | Verified   | GAA | CGG | GAT | 2 | G | A |
| TCGA-10-0930 | LRRC2      | ENST00000296144 | p.R335Q  | c.1004G>A | Verified   | GAA | CGG | GAT | 2 | G | A |
| TCGA-61-2102 | LRRC39     | ENST00000370137 | p.L65L   | c.195G>A  | Verified   | ATT | TTG | AAG | 3 | G | A |
| TCGA-04-1331 | LRRC41     | ENST00000343304 | p.E178K  | c.532G>A  | Verified   | ACC | GAG | CTG | 1 | G | A |
| TCGA-20-1685 | LRRC43     | ENST00000425921 | p.D43N   | c.127G>A  | Unverified | CTG | GAC | CTG | 1 | G | A |
| TCGA-29-1762 | LRRC43     | ENST00000425921 | p.S88N   | c.263G>A  | Unverified | GAC | AGC | CTG | 2 | G | A |
| TCGA-20-1685 | LRRC43_EN5 | ENST00000339777 | p.D228N  | c.682G>A  | Unverified | CTG | GAC | CTG | 1 | G | A |
| TCGA-29-1762 | LRRC43_EN5 | ENST00000339777 | p.S273N  | c.818G>A  | Unverified | GAC | AGC | CTG | 2 | G | A |
| TCGA-61-1895 | LRRC48     | ENST00000448396 | p.V109M  | c.325G>A  | Unverified | CTG | GTG | AAC | 1 | G | A |
| TCGA-61-1895 | LRRC48_EN5 | ENST00000411504 | p.V109M  | c.325G>A  | Unverified | CTG | GTG | AAC | 1 | G | A |
| TCGA-30-1891 | LRRC4C     | ENST00000278198 | p.R295R  | c.885G>A  | Unverified | GAG | CGG | ATA | 3 | G | A |
| TCGA-24-1845 | LRRC58     | ENST00000295628 | p.L188L  | c.564G>A  | Unverified | AAT | CTG | CCT | 3 | G | A |
| TCGA-10-0930 | LRRC71     | ENST00000337428 | p.D266N  | c.796G>A  | Verified   | GGT | GAC | GAG | 1 | G | A |
| TCGA-10-0930 | LRRC71     | ENST00000337428 | p.D266N  | c.796G>A  | Verified   | GGT | GAC | GAG | 1 | G | A |
| TCGA-23-1809 | LRRFIP1_EN | ENST00000308482 | p.R625H  | c.1874G>A | Unverified | AAG | CGT | CTG | 2 | G | A |
| TCGA-23-1029 | LRRK1      | SU_LRRK1        | p.E1446E | c.4338G>A | Unverified | cca | gag | atc | 3 | G | A |
| TCGA-23-1029 | LRRK1_EN5  | ENST00000388948 | p.E1434E | c.4302G>A | Unverified | CCA | GAG | ATC | 3 | G | A |
| TCGA-29-1701 | LRRK2      | SU_LRRK2        | p.R1948H | c.5843G>A | Unverified | att | cgt | ccc | 2 | G | A |
| TCGA-61-1904 | LRRK2      | SU_LRRK2        | p.K1959K | c.5877G>A | Unverified | tcc | aag | ggt | 3 | G | A |
| TCGA-29-1701 | LRRK2_EN5  | ENST00000298910 | p.R1941H | c.5822G>A | Unverified | ATT | CGT | CCC | 2 | G | A |
| TCGA-61-1904 | LRRK2_EN5  | ENST00000298910 | p.K1952K | c.5856G>A | Unverified | TCC | AAG | GGT | 3 | G | A |
| TCGA-29-1761 | LRRN3      | ENST00000308478 | p.M283I  | c.849G>A  | Unverified | AAT | ATG | CTA | 3 | G | A |
| TCGA-29-1781 | LRRTM2     | ENST00000274711 | p.W238*  | c.714G>A  | Unverified | CAA | TGG | AAC | 3 | G | A |
| TCGA-30-1891 | LTB4R2     | ENST00000336557 | p.L44L   | c.132G>A  | Unverified | ACA | CTG | CTG | 3 | G | A |
| TCGA-23-1022 | LTBP1      | NM_206943.1     | p.D1245N | c.3733G>A | Verified   | gaa | gat | att | 1 | G | A |
| TCGA-25-2401 | LTBP1      | NM_206943.1     | p.G1556E | c.4667G>A | Verified   | tat | gga | gag | 2 | G | A |
| TCGA-61-1907 | LTBP2      | ENST00000261978 | p.G1106R | c.3316G>A | Unverified | TCC | GGA | GTC | 1 | G | A |

|              |            |                 |          |            |            |     |     |     |   |   |   |
|--------------|------------|-----------------|----------|------------|------------|-----|-----|-----|---|---|---|
| TCGA-29-1770 | LTBP4_ENST | ENST00000308370 | p.E1255K | c.3763G>A  | Unverified | GAC | GAA | TGT | 1 | G | A |
| TCGA-61-1900 | LTN1       | ENST00000361371 | p.A834T  | c.2500G>A  | Unverified | TCA | GCG | AAA | 1 | G | A |
| TCGA-20-1686 | LTN1       | ENST00000361371 | p.L1652L | c.4956G>A  | Unverified | CAA | CTG | CCT | 3 | G | A |
| TCGA-61-1740 | LUZP1      | ENST00000374623 | p.A858A  | c.2574G>A  | Unverified | GAA | GCG | GAG | 3 | G | A |
| TCGA-20-0991 | MACC1      | ENST00000332878 | p.V696I  | c.2086G>A  | Verified   | TAT | GTT | ATA | 1 | G | A |
| TCGA-61-2094 | MACF1      | ENST00000360115 | p.Q5227Q | c.15681G>A | Unverified | CCA | CAG | CTG | 3 | G | A |
| TCGA-61-2094 | MACF1_ENS  | ENST00000361689 | p.Q4725Q | c.14175G>A | Unverified | CCA | CAG | CTG | 3 | G | A |
| TCGA-24-1417 | MADD       | ENST00000311027 | p.G887R  | c.2659G>A  | Verified   | TTT | GGG | CTA | 1 | G | A |
| TCGA-61-1913 | MAGEB17_E  | ENST00000400004 | p.R268H  | c.803G>A   | Unverified | CCA | CGC | TAC | 2 | G | A |
| TCGA-20-0990 | MAGEB6     | ENST00000379034 | p.R46H   | c.137G>A   | Verified   | tct | cgc | gct | 2 | G | A |
| TCGA-24-1847 | MAGEC1     | ENST00000285879 | p.K1092K | c.3276G>A  | Unverified | cta | aag | aat | 3 | G | A |
| TCGA-09-2044 | MAGED1     | ENST00000375695 | p.Q341Q  | c.1023G>A  | Verified   | act | cag | aac | 3 | G | A |
| TCGA-25-2398 | MAGI2      | ENST00000354212 | p.R564Q  | c.1691G>A  | Verified   | GAT | CGG | CCG | 2 | G | A |
| TCGA-61-1900 | MAGI2      | ENST00000354212 | p.R1099R | c.3297G>A  | Unverified | TAC | AGG | CAA | 3 | G | A |
| TCGA-13-0885 | MAML1      | ENST00000292599 | p.R190H  | c.569G>A   | Verified   | aag | cgt | ctg | 2 | G | A |
| TCGA-24-2267 | MAP1A      | ENST00000300231 | p.R178H  | c.533G>A   | Unverified | TAT | CGT | GTG | 2 | G | A |
| TCGA-29-1695 | MAP1S      | ENST00000324096 | p.P221P  | c.663G>A   | Unverified | CCA | CCG | TCC | 3 | G | A |
| TCGA-29-1699 | MAP2       | ENST00000360351 | p.G74E   | c.221G>A   | Unverified | AAT | GGG | ATC | 2 | G | A |
| TCGA-13-1510 | MAP2       | ENST00000360351 | p.E78E   | c.234G>A   | Verified   | GGA | GAG | CTG | 3 | G | A |
| TCGA-29-1699 | MAP2_ENST  | ENST00000199940 | p.G74E   | c.221G>A   | Unverified | AAT | GGG | ATC | 2 | G | A |
| TCGA-20-1686 | MAP3K12    | ENST00000267079 | p.E39K   | c.115G>A   | Unverified | CCC | GAG | AAG | 1 | G | A |
| TCGA-20-1686 | MAP3K12_E  | ENST00000547035 | p.E39K   | c.115G>A   | Unverified | CCC | GAG | AAG | 1 | G | A |
| TCGA-29-1761 | MAP4K1     | NM_007181       | p.E751K  | c.2251G>A  | Unverified | acc | gaa | gcg | 1 | G | A |
| TCGA-29-1761 | MAP4K1_EN  | ENST00000396857 | p.E751K  | c.2251G>A  | Unverified | ACC | GAA | GCG | 1 | G | A |
| TCGA-04-1331 | MAP4K3     | ENST00000263881 | p.D196N  | c.586G>A   | Verified   | tgt | gat | ctc | 1 | G | A |
| TCGA-13-0905 | MAP7D1     | ENST00000373151 | p.T302T  | c.906G>A   | Verified   | ATG | ACG | CCC | 3 | G | A |
| TCGA-61-1904 | MAPK8IP3   | NM_015133.2     | p.S1138N | c.3413G>A  | Unverified | gtc | agc | aag | 2 | G | A |
| TCGA-61-1904 | MAPK8IP3_I | ENST00000250894 | p.S1132N | c.3395G>A  | Unverified | GTC | AGC | AAG | 2 | G | A |
| TCGA-29-1711 | MARCH1_EN  | ENST00000503008 | p.?      | c.242+1G>A | Unverified | TGC | AGA | ATC | 2 | G | A |
| TCGA-29-1711 | MARCH1_EN  | ENST00000503008 | p.?      | c.242+1G>A | Unverified | TGC | AGA | ATC | 2 | G | A |
| TCGA-13-0714 | MARK3      | ENST00000216288 | p.E120K  | c.358G>A   | Unverified | TTC | GAA | GTC | 1 | G | A |
| TCGA-09-1665 | MARK4      | ENST00000300843 | p.R410Q  | c.1229G>A  | Unverified | CAG | CGG | AGT | 2 | G | A |
| TCGA-29-1691 | MARVELD3   | ENST00000299952 | p.R380H  | c.1139G>A  | Unverified | CTG | CGT | AGC | 2 | G | A |
| TCGA-30-1857 | MAST2_ENS  | ENST00000361297 | p.R1773K | c.5318G>A  | Unverified | CTC | AGG | AGG | 2 | G | A |

|              |           |                     |          |           |            |     |     |     |   |   |   |
|--------------|-----------|---------------------|----------|-----------|------------|-----|-----|-----|---|---|---|
| TCGA-61-2102 | MAST3     | SU_MAST3            | p.A895T  | c.2683G>A | Verified   | cca | gcc | cct | 1 | G | A |
| TCGA-04-1542 | MBD1      | ENST00000382948     | p.R404H  | c.1211G>A | Verified   | tac | cgt | cgt | 2 | G | A |
| TCGA-30-1855 | MBD1      | ENST00000382948     | p.Q103Q  | c.309G>A  | Unverified | ccc | cag | agt | 3 | G | A |
| TCGA-30-1855 | MBD1_ENST | ENST00000269471     | p.Q103Q  | c.309G>A  | Unverified | CCC | CAG | AGT | 3 | G | A |
| TCGA-30-1855 | MBD1_ENST | ENST00000339998     | p.Q103Q  | c.309G>A  | Unverified | CCC | CAG | AGT | 3 | G | A |
| TCGA-30-1855 | MBD1_ENST | ENST00000457839     | p.Q103Q  | c.309G>A  | Unverified | CCC | CAG | AGT | 3 | G | A |
| TCGA-61-1910 | MBD5      | ENST00000407073     | p.L1434L | c.4302G>A | Unverified | GGT | TTG | GAA | 3 | G | A |
| TCGA-29-1699 | MBTPS1    | ENST00000343411     | p.R399Q  | c.1196G>A | Unverified | GTG | CGG | GGT | 2 | G | A |
| TCGA-25-2391 | MC3R      | NM_019888.2         | p.V255I  | c.763G>A  | Unverified | cac | gtc | aag | 1 | G | A |
| TCGA-29-1711 | MCF2L_ENS | ENST00000375601     | p.C680Y  | c.2039G>A | Unverified | GAC | TGC | CCA | 2 | G | A |
| TCGA-29-1711 | MCF2L_ENS | ENST00000375601     | p.C680Y  | c.2039G>A | Unverified | GAC | TGC | CCA | 2 | G | A |
| TCGA-29-1711 | MCF2L_ENS | ENST00000375604     | p.C733Y  | c.2198G>A | Unverified | GAC | TGC | CCA | 2 | G | A |
| TCGA-29-1711 | MCF2L_ENS | ENST00000375604     | p.C733Y  | c.2198G>A | Unverified | GAC | TGC | CCA | 2 | G | A |
| TCGA-29-1711 | MCF2L_ENS | ENST00000375608     | p.C706Y  | c.2117G>A | Unverified | GAC | TGC | CCA | 2 | G | A |
| TCGA-29-1711 | MCF2L_ENS | ENST00000375608     | p.C706Y  | c.2117G>A | Unverified | GAC | TGC | CCA | 2 | G | A |
| TCGA-61-2113 | MCM3AP    | ENST00000397708     | p.E1284K | c.3850G>A | Unverified | gca | gag | tgc | 1 | G | A |
| TCGA-25-2393 | MCM4      | ENST00000523944     | p.D511N  | c.1531G>A | Verified   | ggc | gac | cct | 1 | G | A |
| TCGA-13-0793 | MDGA2     | ENST00000357362     | p.R156Q  | c.467G>A  | Verified   | GAG | CGG | ATG | 2 | G | A |
| TCGA-29-1703 | MDH1B     | ENST00000374412     | p.R72H   | c.215G>A  | Unverified | GAT | CGT | GGA | 2 | G | A |
| TCGA-09-2049 | MDM4      | ENST00000367182     | p.E285E  | c.855G>A  | Verified   | CTG | GAG | GAC | 3 | G | A |
| TCGA-24-2290 | MED23     | ENST00000368068     | p.V1360M | c.4078G>A | Verified   | CAG | GTG | CCC | 1 | G | A |
| TCGA-24-2290 | MED23     | ENST00000368068     | p.V1360M | c.4078G>A | Verified   | CAG | GTG | CCC | 1 | G | A |
| TCGA-04-1361 | MEFV      | ENST00000219596     | p.R348H  | c.1043G>A | Verified   | AGC | CGC | TCA | 2 | G | A |
| TCGA-04-1361 | MEFV      | ENST00000219596     | p.R348H  | c.1043G>A | Verified   | AGC | CGC | TCA | 2 | G | A |
| TCGA-23-1110 | MEGF8     | ENST00000251268_v61 | p.V218V  | c.654G>A  | Verified   | AAC | GTG | AGT | 3 | G | A |
| TCGA-13-0884 | MEIS2     | ENST00000561208     | p.D78N   | c.232G>A  | Verified   | AAG | GAC | GCG | 1 | G | A |
| TCGA-13-0906 | MEIS2     | ENST00000561208     | p.V113I  | c.337G>A  | Verified   | GAC | GTC | TGC | 1 | G | A |
| TCGA-13-0761 | MET       | ENST00000318493     | p.D1398N | c.4192G>A | Verified   | GTG | GAC | ACA | 1 | G | A |
| TCGA-13-0761 | MET       | ENST00000318493     | p.D1398N | c.4192G>A | Verified   | GTG | GAC | ACA | 1 | G | A |
| TCGA-24-1469 | METTL17   | ENST00000339374     | p.K362K  | c.1086G>A | Verified   | AAC | AAG | AAA | 3 | G | A |
| TCGA-29-1705 | MFF       | ENST00000353339     | p.R149K  | c.446G>A  | Unverified | GGC | AGA | CTA | 2 | G | A |
| TCGA-24-2024 | MFSD8     | ENST00000296468     | p.A159T  | c.475G>A  | Verified   | GGT | GCT | ACT | 1 | G | A |
| TCGA-25-2400 | MGA       | XM_031689.7         | p.R2484Q | c.7451G>A | Verified   | cgg | cgg | cgt | 2 | G | A |
| TCGA-24-1604 | MGAM      | ENST00000389322     | p.V263M  | c.787G>A  | Verified   | AAC | GTG | TAT | 1 | G | A |



|              |           |                     |          |           |            |     |     |     |   |   |   |
|--------------|-----------|---------------------|----------|-----------|------------|-----|-----|-----|---|---|---|
| TCGA-24-1604 | MGAM_ENS  | ENST00000549489     | p.V263M  | c.787G>A  | Verified   | AAC | GTG | TAT | 1 | G | A |
| TCGA-13-0904 | MGAT5B    | ENST00000301618     | p.R68H   | c.203G>A  | Verified   | TCC | CGC | GGC | 2 | G | A |
| TCGA-13-1498 | MGC33530  | ENST00000402026     | p.E160K  | c.478G>A  | Verified   | TTC | GAA | GCC | 1 | G | A |
| TCGA-61-1914 | MGEA5     | ENST00000361464     | p.R306Q  | c.917G>A  | Unverified | CCA | CGG | TTA | 2 | G | A |
| TCGA-29-1691 | MIOX      | ENST00000216075     | p.G105D  | c.314G>A  | Unverified | GAG | GGC | ATC | 2 | G | A |
| TCGA-24-1844 | MIPOL1    | ENST00000327441     | p.M202I  | c.606G>A  | Unverified | CAT | ATG | GAA | 3 | G | A |
| TCGA-09-1674 | MITD1     | ENST00000289359     | p.G5R    | c.13G>A   | Unverified | TCC | GGG | CTG | 1 | G | A |
| TCGA-23-1111 | MKI67     | ENST00000368654     | p.D1868N | c.5602G>A | Unverified | GCG | GAC | ACC | 1 | G | A |
| TCGA-29-1761 | MKS1      | ENST00000393119     | p.G255R  | c.763G>A  | Unverified | GAG | GGG | GAG | 1 | G | A |
| TCGA-29-1761 | MKS1_ENST | ENST00000337050     | p.G255R  | c.763G>A  | Unverified | GAG | GGG | GAG | 1 | G | A |
| TCGA-61-1899 | MLL3      | ENST00000262189     | p.G315S  | c.943G>A  | Unverified | GCC | GGC | ACC | 1 | G | A |
| TCGA-61-1899 | MLL3_ENST | ENST00000355193     | p.G315S  | c.943G>A  | Unverified | GCC | GGC | ACC | 1 | G | A |
| TCGA-25-2401 | MLL4      | ENST00000222270     | p.V1428V | c.4284G>A | Unverified | GTG | GTG | GGC | 3 | G | A |
| TCGA-61-1907 | MLLT10_EN | ENST00000307729     | p.L950L  | c.2850G>A | Unverified | ACA | CTG | ACT | 3 | G | A |
| TCGA-61-1907 | MLLT10_EN | ENST00000377072_v68 | p.L966L  | c.2898G>A | Unverified | ACA | CTG | ACT | 3 | G | A |
| TCGA-20-0990 | MMP13     | ENST00000260302     | p.D30N   | c.88G>A   | Verified   | gat | gat | ttg | 1 | G | A |
| TCGA-23-1123 | MMP13     | ENST00000260302     | p.V462I  | c.1384G>A | Verified   | cgc | gtc | atg | 1 | G | A |
| TCGA-23-1123 | MMP13     | ENST00000260302     | p.V462I  | c.1384G>A | Verified   | cgc | gtc | atg | 1 | G | A |
| TCGA-30-1856 | MMP24     | ENST00000246186     | p.R149H  | c.446G>A  | Unverified | AGC | CGT | AGG | 2 | G | A |
| TCGA-24-0975 | MMP27     | ENST00000260229     | p.G205E  | c.614G>A  | Verified   | GAT | GGA | GCA | 2 | G | A |
| TCGA-04-1347 | MMP8      | ENST00000236826     | p.E38K   | c.112G>A  | Verified   | ctg | gaa | aag | 1 | G | A |
| TCGA-29-1784 | MMP9      | ENST00000372330     | p.E237E  | c.711G>A  | Unverified | TTC | GAG | GGC | 3 | G | A |
| TCGA-23-1032 | MN1       | ENST00000302326     | p.P1096P | c.3288G>A | Unverified | GGA | CCG | AAG | 3 | G | A |
| TCGA-23-1022 | MNDA      | ENST00000368141     | p.M404I  | c.1212G>A | Verified   | CCA | ATG | AAT | 3 | G | A |
| TCGA-04-1361 | MOGAT2    | ENST00000198801     | p.A194T  | c.580G>A  | Verified   | gat | gcc | agg | 1 | G | A |
| TCGA-04-1361 | MOGAT2    | ENST00000198801     | p.A194T  | c.580G>A  | Verified   | gat | gcc | agg | 1 | G | A |
| TCGA-61-1895 | MORC2_ENS | ENST00000397641     | p.R55Q   | c.164G>A  | Unverified | AGA | CGA | GAG | 2 | G | A |
| TCGA-04-1530 | MORN1     | ENST00000378531     | p.V131M  | c.391G>A  | Verified   | CAA | GTG | TAC | 1 | G | A |
| TCGA-23-1124 | MOSPD1    | ENST00000370783     | p.D30N   | c.88G>A   | Verified   | gat | gat | cag | 1 | G | A |
| TCGA-13-1489 | MOV10     | ENST00000357443     | p.S224S  | c.672G>A  | Verified   | GAG | TCG | GGT | 3 | G | A |
| TCGA-61-1914 | MPP2      | ENST00000269095     | p.L162L  | c.486G>A  | Unverified | GAG | CTG | GTG | 3 | G | A |
| TCGA-13-0923 | MPZ       | ENST00000360451     | p.G165R  | c.493G>A  | Verified   | TAC | GGG | GTC | 1 | G | A |
| TCGA-13-0923 | MRC1L1    | ENST00000331429     | p.G76R   | c.226G>A  | Verified   | CTG | GGA | GTG | 1 | G | A |
| TCGA-23-1809 | MRGPRD    | ENST00000309106     | p.V274I  | c.820G>A  | Unverified | CCC | GTC | ATC | 1 | G | A |

|              |           |                 |          |             |            |     |     |     |   |   |   |
|--------------|-----------|-----------------|----------|-------------|------------|-----|-----|-----|---|---|---|
| TCGA-61-2012 | MRPS15    | ENST00000373116 | p.R171H  | c.512G>A    | Verified   | CTC | CGT | AAC | 2 | G | A |
| TCGA-25-2391 | MRPS18B   | ENST00000259873 | p.R149Q  | c.446G>A    | Unverified | AAG | CGG | TTG | 2 | G | A |
| TCGA-09-1674 | MRTO4     | ENST00000330263 | p.V112M  | c.334G>A    | Unverified | GAG | GTG | AAT | 1 | G | A |
| TCGA-23-1116 | MRTO4     | ENST00000330263 | p.E185K  | c.553G>A    | Unverified | CCA | GAG | CAG | 1 | G | A |
| TCGA-23-1117 | MRVI1     | ENST00000436272 | p.A153A  | c.459G>A    | Verified   | CTG | GCG | CTG | 3 | G | A |
| TCGA-23-1117 | MRVI1     | ENST00000436272 | p.A153A  | c.459G>A    | Verified   | CTG | GCG | CTG | 3 | G | A |
| TCGA-29-1761 | MS4A4E    | ENST00000427611 | p.A70A   | c.210G>A    | Unverified | GTT | GCG | TAC | 3 | G | A |
| TCGA-25-1313 | MS4A5     | ENST00000300190 | p.A128T  | c.382G>A    | Verified   | GGA | GCA | ATA | 1 | G | A |
| TCGA-13-1510 | MS4A6A    | ENST00000323961 | p.G99S   | c.295G>A    | Unverified | TCT | GGC | TCT | 1 | G | A |
| TCGA-24-1469 | MSGN1     | ENST00000281047 | p.A87T   | c.259G>A    | Verified   | GGG | GCC | AGT | 1 | G | A |
| TCGA-23-1117 | MSH2      | ENST00000233146 | p.Q409Q  | c.1227G>A   | Verified   | tat | cag | ggt | 3 | G | A |
| TCGA-23-1117 | MSH2      | ENST00000233146 | p.Q409Q  | c.1227G>A   | Verified   | tat | cag | ggt | 3 | G | A |
| TCGA-13-1498 | MSR1      | ENST00000262101 | p.?      | c.1223-1G>A | Verified   | CAA | GGT | ACT | 2 | G | A |
| TCGA-13-0884 | MST4      | ENST00000394334 | p.E382K  | c.1144G>A   | Verified   | ctc | gag | aaa | 1 | G | A |
| TCGA-13-0791 | MTF1      | ENST00000373036 | p.G255R  | c.763G>A    | Verified   | ACA | GGG | GAA | 1 | G | A |
| TCGA-61-1998 | MTFMT     | ENST00000220058 | p.D183N  | c.547G>A    | Unverified | TTT | GAT | GTA | 1 | G | A |
| TCGA-24-1845 | MTMR4     | ENST00000323456 | p.R526Q  | c.1577G>A   | Unverified | AAG | CGG | ACC | 2 | G | A |
| TCGA-04-1347 | MTMR6     | ENST00000381801 | p.G301S  | c.901G>A    | Verified   | TCC | GGT | TTG | 1 | G | A |
| TCGA-04-1338 | MTOR      | ENST00000361445 | p.E875K  | c.2623G>A   | Unverified | act | gag | cag | 1 | G | A |
| TCGA-61-1733 | MTOR      | ENST00000361445 | p.R281H  | c.842G>A    | Unverified | gag | cgt | ctg | 2 | G | A |
| TCGA-61-1733 | MTOR      | ENST00000361445 | p.R281H  | c.842G>A    | Unverified | gag | cgt | ctg | 2 | G | A |
| TCGA-29-1785 | MTPAP     | ENST00000263063 | p.L169L  | c.507G>A    | Unverified | CAG | TTG | CCA | 3 | G | A |
| TCGA-29-1785 | MTPAP     | ENST00000263063 | p.L169L  | c.507G>A    | Unverified | CAG | TTG | CCA | 3 | G | A |
| TCGA-29-1785 | MTPAP_ENS | ENST00000358107 | p.L299L  | c.897G>A    | Unverified | CAG | TTG | CCA | 3 | G | A |
| TCGA-29-1785 | MTPAP_ENS | ENST00000358107 | p.L299L  | c.897G>A    | Unverified | CAG | TTG | CCA | 3 | G | A |
| TCGA-10-0930 | MTUS2_ENS | ENST00000431530 | p.A951T  | c.2851G>A   | Verified   | GAT | GCT | CAG | 1 | G | A |
| TCGA-10-0930 | MTUS2_ENS | ENST00000431530 | p.A951T  | c.2851G>A   | Verified   | GAT | GCT | CAG | 1 | G | A |
| TCGA-23-2077 | MTX2      | ENST00000249442 | p.V89I   | c.265G>A    | Verified   | ATA | GTC | CAA | 1 | G | A |
| TCGA-13-0913 | MUC16     | ENST00000397910 | p.E2683K | c.8047G>A   | Verified   | CCA | GAG | ACT | 1 | G | A |
| TCGA-24-2288 | MUC16     | ENST00000397910 | p.E3142K | c.9424G>A   | Unverified | CCA | GAA | ACA | 1 | G | A |
| TCGA-04-1367 | MUC17     | ENST00000306151 | p.V2859M | c.8575G>A   | Verified   | GTC | GTG | CCA | 1 | G | A |
| TCGA-13-1481 | MUC17     | ENST00000306151 | p.G5G    | c.15G>A     | Verified   | CCA | GGG | ACC | 3 | G | A |
| TCGA-13-0904 | MUC17     | ENST00000306151 | p.V2546V | c.7638G>A   | Verified   | CCT | GTG | GTC | 3 | G | A |
| TCGA-25-2398 | MUC21     | ENST00000376296 | p.E161K  | c.481G>A    | Unverified | AGT | GAG | GCC | 1 | G | A |

|              |           |                 |          |            |            |     |     |     |   |   |   |
|--------------|-----------|-----------------|----------|------------|------------|-----|-----|-----|---|---|---|
| TCGA-25-2398 | MUC21     | ENST00000376296 | p.S103N  | c.308G>A   | Verified   | ATC | AGC | ATA | 2 | G | A |
| TCGA-25-2398 | MUC21     | ENST00000376296 | p.K2K    | c.6G>A     | Unverified | ATG | AAG | ATG | 3 | G | A |
| TCGA-24-1846 | MUC4      | ENST00000346145 | p.G86R   | c.256G>A   | Unverified | TAT | GGG | GCA | 1 | G | A |
| TCGA-24-1846 | MUC4_ENST | ENST00000405167 | p.G4194R | c.12580G>A | Unverified | TAT | GGG | GCA | 1 | G | A |
| TCGA-24-1846 | MUC4_ENST | ENST00000463781 | p.G4322R | c.12964G>A | Unverified | TAT | GGG | GCA | 1 | G | A |
| TCGA-29-1691 | MUC5AC    | ENST00000349637 | p.A2513T | c.7537G>A  | Unverified | AAA | GCC | ACT | 1 | G | A |
| TCGA-29-1691 | MUC5B     | ENST00000529681 | p.A2510T | c.7528G>A  | Unverified | AAA | GCC | ACT | 1 | G | A |
| TCGA-29-1702 | MUC7      | ENST00000304887 | p.A274T  | c.820G>A   | Unverified | TCC | GCC | TCA | 1 | G | A |
| TCGA-24-1846 | MURC      | ENST00000307584 | p.R272H  | c.815G>A   | Unverified | ATG | CGC | AGC | 2 | G | A |
| TCGA-30-1718 | MUSK      | ENST00000374448 | p.A706T  | c.2116G>A  | Unverified | ATT | GCC | AGG | 1 | G | A |
| TCGA-29-1702 | MVK       | ENST00000228510 | p.V49V   | c.147G>A   | Unverified | AAA | GTG | GAC | 3 | G | A |
| TCGA-13-1505 | MYADM     | ENST00000391768 | p.E164K  | c.490G>A   | Verified   | GGC | GAG | ATC | 1 | G | A |
| TCGA-30-1718 | MYADM     | ENST00000391768 | p.A152T  | c.454G>A   | Unverified | TAC | GCC | ACC | 1 | G | A |
| TCGA-61-2008 | MYBBP1A   | ENST00000254718 | p.G1226G | c.3678G>A  | Verified   | AAC | GGG | ACG | 3 | G | A |
| TCGA-24-2024 | MYBPC3    | ENST00000399249 | p.D1149N | c.3445G>A  | Verified   | AGT | GAC | AGA | 1 | G | A |
| TCGA-13-0924 | MYH15     | ENST00000273353 | p.V1447I | c.4339G>A  | Verified   | AAG | GTC | CGC | 1 | G | A |
| TCGA-13-1496 | MYH15     | ENST00000273353 | p.V315I  | c.943G>A   | Verified   | CTG | GTA | TCT | 1 | G | A |
| TCGA-09-2050 | MYH2      | ENST00000245503 | p.R445H  | c.1334G>A  | Verified   | GCC | CGC | ATC | 2 | G | A |
| TCGA-24-1474 | MYH2      | ENST00000245503 | p.R1388H | c.4163G>A  | Verified   | CAG | CGC | ACA | 2 | G | A |
| TCGA-13-1498 | MYH3      | ENST00000226209 | p.V587M  | c.1759G>A  | Verified   | ACC | GTG | GAC | 1 | G | A |
| TCGA-13-0920 | MYH7      | ENST00000355349 | p.R1359H | c.4076G>A  | Verified   | CAG | CGC | GTC | 2 | G | A |
| TCGA-24-1850 | MYH7      | ENST00000355349 | p.R237R  | c.711G>A   | Unverified | GTC | CGG | AAC | 3 | G | A |
| TCGA-13-1507 | MYL10     | ENST00000223167 | p.R32Q   | c.95G>A    | Verified   | GCT | CGG | AAA | 2 | G | A |
| TCGA-13-1496 | MYL2      | ENST00000228841 | p.K4K    | c.12G>A    | Verified   | CCT | AAG | AAA | 3 | G | A |
| TCGA-61-2094 | MYLIP     | ENST00000356840 | p.E164K  | c.490G>A   | Unverified | TTG | GAG | GGG | 1 | G | A |
| TCGA-30-1856 | MYLK2     | ENST00000375994 | p.A544A  | c.1632G>A  | Unverified | ctg | gcg | gag | 3 | G | A |
| TCGA-13-0883 | MYO10     | ENST00000274203 | p.R1024Q | c.3071G>A  | Verified   | ATC | CGG | ACC | 2 | G | A |
| TCGA-24-1843 | MYO16     | ENST00000357550 | p.D62N   | c.184G>A   | Unverified | ACG | GAC | ATG | 1 | G | A |
| TCGA-23-1021 | MYO18A_EM | ENST00000527372 | p.R466Q  | c.1397G>A  | Verified   | TGT | CGG | CGG | 2 | G | A |
| TCGA-24-2289 | MYO18A_EM | ENST00000527372 | p.T349T  | c.1047G>A  | Unverified | GAG | ACG | GAG | 3 | G | A |
| TCGA-29-1776 | MYO3A     | ENST00000265944 | p.E1345K | c.4033G>A  | Unverified | GAG | GAA | GAA | 1 | G | A |
| TCGA-24-1846 | MYO5A     | ENST00000399231 | p.E977K  | c.2929G>A  | Unverified | GAG | GAA | GCG | 1 | G | A |
| TCGA-13-0755 | MYO5C     | ENST00000261839 | p.G68S   | c.202G>A   | Verified   | GTG | GGC | GAG | 1 | G | A |
| TCGA-13-1498 | MYO5C     | ENST00000261839 | p.D71N   | c.211G>A   | Verified   | AAT | GAC | CTC | 1 | G | A |

|              |         |                 |          |           |            |     |     |     |   |   |   |
|--------------|---------|-----------------|----------|-----------|------------|-----|-----|-----|---|---|---|
| TCGA-04-1652 | MYO6    | ENST00000369977 | p.R928H  | c.2783G>A | Unverified | AGG | CGT | ATT | 2 | G | A |
| TCGA-04-1652 | MYO6    | ENST00000369977 | p.R928H  | c.2783G>A | Unverified | AGG | CGT | ATT | 2 | G | A |
| TCGA-13-0906 | MYO9A   | ENST00000356056 | p.R2283H | c.6848G>A | Verified   | GGG | CGT | ATT | 2 | G | A |
| TCGA-29-1770 | MYO9A   | ENST00000356056 | p.M1965I | c.5895G>A | Unverified | TAT | ATG | AAT | 3 | G | A |
| TCGA-25-1326 | MYOM1   | ENST00000356443 | p.G953E  | c.2858G>A | Verified   | CTT | GGA | TGG | 2 | G | A |
| TCGA-29-1691 | MYRIP   | ENST00000302541 | p.D12N   | c.34G>A   | Unverified | ACT | GAT | GAT | 1 | G | A |
| TCGA-09-2049 | MYST3   | ENST00000265713 | p.V585M  | c.1753G>A | Verified   | AAT | GTG | AGT | 1 | G | A |
| TCGA-20-1687 | MYST4   | ENST00000287239 | p.D875N  | c.2623G>A | Unverified | ATT | GAT | TTC | 1 | G | A |
| TCGA-13-0890 | MYT1    | ENST00000328439 | p.T503T  | c.1509G>A | Verified   | AAC | ACG | CAC | 3 | G | A |
| TCGA-24-1845 | MYT1L   | ENST00000399161 | p.E343K  | c.1027G>A | Unverified | AGT | GAG | ACC | 1 | G | A |
| TCGA-24-1469 | MZF1    | ENST00000215057 | p.E125E  | c.375G>A  | Verified   | CGG | GAG | CCG | 3 | G | A |
| TCGA-61-1738 | N4BP2   | ENST00000261435 | p.V275I  | c.823G>A  | Unverified | tgc | gtt | gag | 1 | G | A |
| TCGA-61-1738 | N4BP2   | ENST00000261435 | p.V275I  | c.823G>A  | Unverified | tgc | gtt | gag | 1 | G | A |
| TCGA-61-1914 | NAA11   | ENST00000286794 | p.G182D  | c.545G>A  | Unverified | CAG | GGC | AGC | 2 | G | A |
| TCGA-13-0887 | NAA25   | ENST00000261745 | p.L174L  | c.522G>A  | Verified   | TTT | CTG | CCC | 3 | G | A |
| TCGA-61-1738 | NAALAD2 | ENST00000534061 | p.V643I  | c.1927G>A | Unverified | CAA | GTT | GAT | 1 | G | A |
| TCGA-61-1738 | NAALAD2 | ENST00000534061 | p.V643I  | c.1927G>A | Unverified | CAA | GTT | GAT | 1 | G | A |
| TCGA-13-0920 | NAB2    | ENST00000300131 | p.G232D  | c.695G>A  | Verified   | GGG | GGT | GGT | 2 | G | A |
| TCGA-61-2113 | NADK    | ENST00000341991 | p.R237Q  | c.710G>A  | Unverified | CTC | CGG | AGT | 2 | G | A |
| TCGA-04-1343 | NADKD1  | ENST00000397338 | p.G65G   | c.195G>A  | Verified   | GAA | GGG | ACT | 3 | G | A |
| TCGA-23-1114 | NAGLU   | ENST00000225927 | p.A330T  | c.988G>A  | Unverified | GCA | GCC | ACC | 1 | G | A |
| TCGA-13-1496 | NAGLU   | ENST00000225927 | p.P488P  | c.1464G>A | Unverified | CAC | CCG | GAC | 3 | G | A |
| TCGA-29-1775 | NAGPA   | ENST00000312251 | p.G289D  | c.866G>A  | Unverified | GGT | GGC | TCT | 2 | G | A |
| TCGA-04-1347 | NALCN   | ENST00000251127 | p.R1498H | c.4493G>A | Verified   | CTG | CGT | GGG | 2 | G | A |
| TCGA-04-1347 | NAP1L4  | ENST00000380542 | p.G249R  | c.745G>A  | Verified   | GAC | GGG | TGT | 1 | G | A |
| TCGA-30-1855 | NAV2    | ENST00000360655 | p.G956S  | c.2866G>A | Unverified | AGC | GGC | ATC | 1 | G | A |
| TCGA-29-1776 | NAV2    | ENST00000360655 | p.R800K  | c.2399G>A | Unverified | GGG | AGG | CCC | 2 | G | A |
| TCGA-23-1111 | NAV3    | NM_014903.3     | p.V15I   | c.43G>A   | Unverified | gct | gtt | ggg | 1 | G | A |
| TCGA-61-1913 | NAV3    | NM_014903.3     | p.S545N  | c.1634G>A | Unverified | ggc | agc | aca | 2 | G | A |
| TCGA-29-1777 | NBAS    | ENST00000281513 | p.G1471E | c.4412G>A | Unverified | CAA | GGG | TGT | 2 | G | A |
| TCGA-09-1674 | NBAS    | ENST00000281513 | p.K1790K | c.5370G>A | Unverified | AAG | AAG | TTT | 3 | G | A |
| TCGA-24-1470 | NBEAL2  | ENST00000292309 | p.A2057T | c.6169G>A | Verified   | CCG | GCC | GCG | 1 | G | A |
| TCGA-23-1809 | NBN     | ENST00000265433 | p.D272N  | c.814G>A  | Unverified | gtt | gat | aca | 1 | G | A |
| TCGA-23-1120 | NBPF3   | ENST00000318249 | p.V534M  | c.1600G>A | Unverified | GAC | GTG | GAT | 1 | G | A |

|              |             |                 |          |            |            |     |     |     |   |   |   |
|--------------|-------------|-----------------|----------|------------|------------|-----|-----|-----|---|---|---|
| TCGA-10-0930 | NCAN        | ENST00000252575 | p.R231H  | c.692G>A   | Verified   | GAC | CGT | AGC | 2 | G | A |
| TCGA-10-0930 | NCAN        | ENST00000252575 | p.R231H  | c.692G>A   | Verified   | GAC | CGT | AGC | 2 | G | A |
| TCGA-29-1781 | NCAPG2      | NM_017760.4     | p.V355I  | c.1063G>A  | Unverified | ttt | ggt | gaa | 1 | G | A |
| TCGA-24-1423 | NCF2        | ENST00000367536 | p.D316N  | c.946G>A   | Verified   | TCC | GAC | ATC | 1 | G | A |
| TCGA-30-1855 | NCKAP5      | ENST00000409261 | p.E463K  | c.1387G>A  | Unverified | AAG | GAA | CCC | 1 | G | A |
| TCGA-61-1913 | NCOA1       | ENST00000406961 | p.L827L  | c.2481G>A  | Unverified | CAG | TTG | CCA | 3 | G | A |
| TCGA-61-1913 | NCOA1_ENS   | ENST00000405141 | p.L827L  | c.2481G>A  | Unverified | CAG | TTG | CCA | 3 | G | A |
| TCGA-24-1844 | NCOR2_ENS   | ENST00000405201 | p.M2337I | c.7011G>A  | Unverified | AAC | ATG | GGG | 3 | G | A |
| TCGA-24-1474 | NCR1        | ENST00000291890 | p.G167R  | c.499G>A   | Verified   | CGC | GGA | TAC | 1 | G | A |
| TCGA-24-1422 | NDC80       | ENST00000261597 | p.E533E  | c.1599G>A  | Verified   | CTT | GAG | TCC | 3 | G | A |
| TCGA-29-1764 | NDE1        | ENST00000396354 | p.V84V   | c.252G>A   | Unverified | GAA | GTG | CAG | 3 | G | A |
| TCGA-13-0886 | NDFIP2      | ENST00000218652 | p.A136A  | c.408G>A   | Unverified | GCT | GCG | TCT | 3 | G | A |
| TCGA-29-1699 | NDN         | ENST00000331837 | p.A74A   | c.222G>A   | Unverified | GCT | GCG | GAG | 3 | G | A |
| TCGA-24-1103 | NDUFV2      | ENST00000318388 | p.K129K  | c.387G>A   | Verified   | GGA | AAG | TAT | 3 | G | A |
| TCGA-24-1843 | NEB         | ENST00000409198 | p.A4311T | c.12931G>A | Unverified | GCC | GCC | AAG | 1 | G | A |
| TCGA-13-0887 | NEB         | ENST00000409198 | p.G6569E | c.19706G>A | Verified   | GAC | GGG | GGT | 2 | G | A |
| TCGA-24-1843 | NEB_ENST00  | ENST00000397345 | p.A6012T | c.18034G>A | Unverified | GCC | GCC | AAG | 1 | G | A |
| TCGA-24-1843 | NEB_ENST00  | ENST00000427231 | p.A6012T | c.18034G>A | Unverified | GCC | GCC | AAG | 1 | G | A |
| TCGA-04-1649 | NECAB1      | ENST00000417640 | p.D39N   | c.115G>A   | Unverified | GCA | GAC | AAA | 1 | G | A |
| TCGA-04-1542 | NECAB2      | ENST00000305202 | p.A356A  | c.1068G>A  | Verified   | AAG | GCG | TTC | 3 | G | A |
| TCGA-61-2109 | NEFM        | ENST00000221166 | p.R371R  | c.1113G>A  | Unverified | CTT | CGG | GGC | 3 | G | A |
| TCGA-13-0890 | NEK1_ENST00 | ENST00000507142 | p.R484H  | c.1451G>A  | Verified   | GTT | CGT | CCA | 2 | G | A |
| TCGA-29-1777 | NELL2       | ENST00000429094 | p.E750K  | c.2248G>A  | Unverified | AAT | GAG | TGC | 1 | G | A |
| TCGA-29-1777 | NELL2_ENST  | ENST00000437801 | p.E800K  | c.2398G>A  | Unverified | AAT | GAG | TGC | 1 | G | A |
| TCGA-13-0885 | NES         | ENST00000368223 | p.G1475D | c.4424G>A  | Verified   | AGG | GGT | GCA | 2 | G | A |
| TCGA-29-1699 | NEU2        | ENST00000233840 | p.R152Q  | c.455G>A   | Unverified | TAC | CGG | GAG | 2 | G | A |
| TCGA-24-1431 | NEURL4      | ENST00000399464 | p.R366H  | c.1097G>A  | Verified   | ATC | CGT | ATC | 2 | G | A |
| TCGA-24-1431 | NEURL4_EN   | ENST00000315614 | p.R366H  | c.1097G>A  | Verified   | ATC | CGT | ATC | 2 | G | A |
| TCGA-04-1652 | NEUROD6     | ENST00000297142 | p.E103K  | c.307G>A   | Unverified | CGC | GAG | AGG | 1 | G | A |
| TCGA-04-1652 | NEUROD6     | ENST00000297142 | p.E103K  | c.307G>A   | Unverified | CGC | GAG | AGG | 1 | G | A |
| TCGA-23-2078 | NF1         | ENST00000358273 | p.A1858T | c.5572G>A  | Verified   | ATC | GCA | TTA | 1 | G | A |
| TCGA-13-1488 | NFAT5_ENST  | ENST00000432919 | p.G39E   | c.116G>A   | Verified   | GCT | GGA | CTA | 2 | G | A |
| TCGA-13-0903 | NFATC2      | ENST00000396009 | p.S107S  | c.321G>A   | Verified   | GCC | TCG | GGC | 3 | G | A |
| TCGA-25-2042 | NFKBIZ      | ENST00000326172 | p.R572K  | c.1715G>A  | Verified   | CAG | AGA | AAT | 2 | G | A |

|              |           |                 |          |             |            |     |     |     |   |   |   |
|--------------|-----------|-----------------|----------|-------------|------------|-----|-----|-----|---|---|---|
| TCGA-04-1338 | NFX1      | ENST00000379540 | p.C520Y  | c.1559G>A   | Verified   | CAG | TGC | CAG | 2 | G | A |
| TCGA-04-1337 | NFXL1     | ENST00000381538 | p.R815H  | c.2444G>A   | Verified   | GTA | CGT | GAA | 2 | G | A |
| TCGA-24-1464 | NHLRC2    | ENST00000369301 | p.M698I  | c.2094G>A   | Verified   | ATG | ATG | AAG | 3 | G | A |
| TCGA-61-1998 | NHP2      | ENST00000274606 | p.D113N  | c.337G>A    | Unverified | ACG | GAC | CTG | 1 | G | A |
| TCGA-61-1998 | NHP2      | ENST00000274606 | p.E134K  | c.400G>A    | Unverified | GAG | GAG | TAC | 1 | G | A |
| TCGA-29-1770 | NHP2L1    | ENST00000355257 | p.V55M   | c.163G>A    | Unverified | atc | gtg | atg | 1 | G | A |
| TCGA-29-1690 | NICN1     | ENST00000273598 | p.S98S   | c.294G>A    | Unverified | GTA | TCG | CTG | 3 | G | A |
| TCGA-24-2262 | NINJ2     | ENST00000305108 | p.K97K   | c.291G>A    | Verified   | CTG | AAG | GCG | 3 | G | A |
| TCGA-09-1674 | NINL      | ENST00000278886 | p.V671V  | c.2013G>A   | Unverified | AGC | GTG | CTG | 3 | G | A |
| TCGA-61-1910 | NIPBL     | ENST00000282516 | p.R2793Q | c.8378G>A   | Unverified | tta | cga | tcc | 2 | G | A |
| TCGA-23-1122 | NKIRAS1   | ENST00000388759 | p.V144I  | c.430G>A    | Unverified | aaa | gta | aga | 1 | G | A |
| TCGA-13-1408 | NKTR      | ENST00000232978 | p.A1151T | c.3451G>A   | Verified   | AAT | GCA | CGG | 1 | G | A |
| TCGA-13-1481 | NKTR      | ENST00000232978 | p.R430H  | c.1289G>A   | Verified   | AAA | CGC | AGA | 2 | G | A |
| TCGA-25-2393 | NLRC5     | ENST00000262510 | p.G1005S | c.3013G>A   | Verified   | CTC | GGT | CAC | 1 | G | A |
| TCGA-10-0930 | NLRC5     | ENST00000262510 | p.L1238L | c.3714G>A   | Verified   | TGG | TTG | CTG | 3 | G | A |
| TCGA-10-0930 | NLRC5     | ENST00000262510 | p.L1238L | c.3714G>A   | Verified   | TGG | TTG | CTG | 3 | G | A |
| TCGA-09-2056 | NLRP1     | ENST00000572272 | p.A436A  | c.1308G>A   | Verified   | CCG | GCG | GAT | 3 | G | A |
| TCGA-24-2290 | NLRP10    | ENST00000328600 | p.E48K   | c.142G>A    | Verified   | GGG | GAG | TTG | 1 | G | A |
| TCGA-24-2290 | NLRP10    | ENST00000328600 | p.E48K   | c.142G>A    | Verified   | GGG | GAG | TTG | 1 | G | A |
| TCGA-23-1022 | NLRP12    | ENST00000324134 | p.E127K  | c.379G>A    | Verified   | CAG | GAA | ACC | 1 | G | A |
| TCGA-23-1021 | NLRP13    | ENST00000342929 | p.K686K  | c.2058G>A   | Verified   | AAT | AAG | CTA | 3 | G | A |
| TCGA-29-1695 | NLRP3     | ENST00000391828 | p.D282N  | c.844G>A    | Unverified | ccc | gac | cca | 1 | G | A |
| TCGA-29-1690 | NLRP4_ENS | ENST00000301295 | p.G638R  | c.1912G>A   | Unverified | AGC | GGG | CAC | 1 | G | A |
| TCGA-29-1764 | NLRP4_ENS | ENST00000301295 | p.V376I  | c.1126G>A   | Unverified | TTC | GTC | TTT | 1 | G | A |
| TCGA-23-1116 | NLRP5     | ENST00000390649 | p.V407I  | c.1219G>A   | Unverified | ATC | GTC | ACC | 1 | G | A |
| TCGA-29-1699 | NLRP8_ENS | ENST00000291971 | p.R91H   | c.272G>A    | Unverified | GAG | CGT | TTC | 2 | G | A |
| TCGA-24-1563 | NLRP9     | ENST00000332836 | p.S7S    | c.21G>A     | Verified   | TTT | TCG | GAT | 3 | G | A |
| TCGA-23-1032 | NM_001080 | ENST00000271263 | p.T79T   | c.237G>A    | Unverified | CAC | ACG | GGC | 3 | G | A |
| TCGA-61-1914 | NME4      | ENST00000219479 | p.?      | c.225+1G>A  | Unverified | CTG | CAG | GCA | 3 | G | A |
| TCGA-25-2392 | NOC3L     | ENST00000371361 | p.R614H  | c.1841G>A   | Verified   | AAG | CGC | AGA | 2 | G | A |
| TCGA-29-1693 | NOL11     | ENST00000253247 | p.E524E  | c.1572G>A   | Unverified | ATG | GAG | TCA | 3 | G | A |
| TCGA-23-1116 | NOSIP     | ENST00000391853 | p.G243E  | c.728G>A    | Unverified | TCT | GGG | GCT | 2 | G | A |
| TCGA-04-1638 | NOTCH4    | ENST00000375023 | p.A1175T | c.3523G>A   | Unverified | gga | gcc | aag | 1 | G | A |
| TCGA-09-1674 | NOTCH4    | ENST00000375023 | p.?      | c.2438+1G>A | Unverified | gac | agc | ccc | 2 | G | A |

|              |            |                 |          |           |            |     |     |     |   |   |   |
|--------------|------------|-----------------|----------|-----------|------------|-----|-----|-----|---|---|---|
| TCGA-13-0903 | NOTCH4     | ENST00000375023 | p.M252I  | c.756G>A  | Verified   | ctg | atg | cca | 3 | G | A |
| TCGA-61-1740 | NOVA2      | ENST00000263257 | p.L417L  | c.1251G>A | Unverified | AAC | CTG | GTG | 3 | G | A |
| TCGA-61-1904 | NOX5       | ENST00000260364 | p.V13M   | c.37G>A   | Unverified | TGG | GTG | ACT | 1 | G | A |
| TCGA-29-1769 | NPAS2      | ENST00000335681 | p.L599L  | c.1797G>A | Unverified | CAC | CTG | CTC | 3 | G | A |
| TCGA-25-1326 | NPHP4      | ENST00000378156 | p.G932S  | c.2794G>A | Unverified | TTG | GGC | CGG | 1 | G | A |
| TCGA-13-0792 | NPHS1      | ENST00000378910 | p.R800H  | c.2399G>A | Verified   | GGG | CGC | CTG | 2 | G | A |
| TCGA-61-1899 | NPHS2      | ENST00000367615 | p.E173E  | c.519G>A  | Unverified | CTG | GAG | ATA | 3 | G | A |
| TCGA-30-1718 | NPNT       | ENST00000379987 | p.W294*  | c.881G>A  | Unverified | ACT | TGG | TGG | 2 | G | A |
| TCGA-09-1665 | NPR1       | ENST00000368680 | p.G541S  | c.1621G>A | Verified   | tac | ggc | tcc | 1 | G | A |
| TCGA-25-2398 | NPR1       | ENST00000368680 | p.K675K  | c.2025G>A | Verified   | ctc | aag | atc | 3 | G | A |
| TCGA-20-1686 | NQO2       | ENST00000380430 | p.Q123Q  | c.369G>A  | Unverified | TGC | CAG | GGC | 3 | G | A |
| TCGA-24-1850 | NR_003034_ | ENST00000338231 | p.R5R    | c.15G>A   | Unverified | AAC | AGG | GTG | 3 | G | A |
| TCGA-24-1845 | NR1D1      | ENST00000246672 | p.L4L    | c.12G>A   | Unverified | acc | ctg | gac | 3 | G | A |
| TCGA-25-1326 | NR1H3      | ENST00000441012 | p.R226Q  | c.677G>A  | Verified   | AAC | CGG | CGC | 2 | G | A |
| TCGA-04-1343 | NR4A2      | ENST00000339562 | p.R278H  | c.833G>A  | Verified   | gtg | cgc | acc | 2 | G | A |
| TCGA-24-1422 | NRCAM      | ENST00000351718 | p.L954L  | c.2862G>A | Verified   | ACT | TTG | GAA | 3 | G | A |
| TCGA-29-1764 | NRCAM      | ENST00000351718 | p.K674K  | c.2022G>A | Unverified | CAC | AAG | CCA | 3 | G | A |
| TCGA-29-1764 | NRCAM_EN!  | ENST00000379028 | p.K690K  | c.2070G>A | Unverified | CAC | AAG | CCA | 3 | G | A |
| TCGA-24-1417 | NRXN1      | ENST00000342183 | p.K155K  | c.465G>A  | Unverified | GTT | AAG | TTT | 3 | G | A |
| TCGA-24-1417 | NRXN1_ENS  | ENST00000406316 | p.K1190K | c.3570G>A | Unverified | GTT | AAG | TTT | 3 | G | A |
| TCGA-24-2267 | NRXN2      | ENST00000377551 | p.D1081N | c.3241G>A | Verified   | gcc | gac | gcc | 1 | G | A |
| TCGA-61-2113 | NRXN2      | ENST00000377551 | p.G678G  | c.2034G>A | Unverified | cag | ggg | gct | 3 | G | A |
| TCGA-30-1718 | NRXN2      | ENST00000377551 | p.Q890Q  | c.2670G>A | Unverified | ggc | cag | ccc | 3 | G | A |
| TCGA-13-1497 | NSRP1      | ENST00000247026 | p.E441K  | c.1321G>A | Verified   | CGA | GAG | GTA | 1 | G | A |
| TCGA-13-0755 | NT5E       | ENST00000257770 | p.V300I  | c.898G>A  | Verified   | AAC | GTC | ATC | 1 | G | A |
| TCGA-09-2056 | NTHL1_ENS  | ENST00000219066 | p.L282L  | c.846G>A  | Unverified | CTC | TTG | GTG | 3 | G | A |
| TCGA-04-1331 | NTNG1      | ENST00000370074 | p.M87I   | c.261G>A  | Verified   | TAC | ATG | TGC | 3 | G | A |
| TCGA-24-1469 | NTPCR      | ENST00000366628 | p.V185M  | c.553G>A  | Verified   | TGC | GTG | CAG | 1 | G | A |
| TCGA-09-2050 | NUMA1      | ENST00000393695 | p.E1275K | c.3823G>A | Verified   | gca | gag | aca | 1 | G | A |
| TCGA-29-1698 | NUMA1      | ENST00000393695 | p.A1431T | c.4291G>A | Unverified | aag | gcc | agc | 1 | G | A |
| TCGA-61-1740 | NUP133     | ENST00000261396 | p.R476R  | c.1428G>A | Unverified | tca | agg | gaa | 3 | G | A |
| TCGA-23-1029 | NUP155     | ENST00000231498 | p.G1190G | c.3570G>A | Unverified | TAT | GGG | GAA | 3 | G | A |
| TCGA-23-1117 | NUP54      | ENST00000264883 | p.M343I  | c.1029G>A | Verified   | cag | atg | act | 3 | G | A |
| TCGA-23-1117 | NUP54      | ENST00000264883 | p.M343I  | c.1029G>A | Verified   | cag | atg | act | 3 | G | A |

|              |            |                 |          |            |            |     |     |     |   |   |   |
|--------------|------------|-----------------|----------|------------|------------|-----|-----|-----|---|---|---|
| TCGA-04-1638 | NUP98      | ENST00000324932 | p.G366S  | c.1096G>A  | Unverified | ttt | ggc | aat | 1 | G | A |
| TCGA-13-1497 | NUPL2      | ENST00000258742 | p.G346S  | c.1036G>A  | Verified   | ttt | ggt | agt | 1 | G | A |
| TCGA-23-1022 | NXN        | ENST00000336868 | p.R213Q  | c.638G>A   | Verified   | ACC | CGG | GTC | 2 | G | A |
| TCGA-24-1469 | NXT1       | ENST00000254998 | p.E18K   | c.52G>A    | Verified   | GCT | GAG | GAG | 1 | G | A |
| TCGA-04-1361 | O5AK3_HUM  | ENST00000326876 | p.M258I  | c.774G>A   | Verified   | TAC | ATG | TAC | 3 | G | A |
| TCGA-04-1361 | O5AK3_HUM  | ENST00000326876 | p.M258I  | c.774G>A   | Verified   | TAC | ATG | TAC | 3 | G | A |
| TCGA-13-1481 | OAS1       | ENST00000445409 | p.E175K  | c.523G>A   | Verified   | ATC | GAG | GAG | 1 | G | A |
| TCGA-24-0975 | OBSCN      | SU_OBSCN.1      | p.A2858T | c.8572G>A  | Unverified | gat | gcc | ggg | 1 | G | A |
| TCGA-30-1856 | OBSCN      | SU_OBSCN.1      | p.L3510L | c.10530G>A | Unverified | ggt | ctg | agg | 3 | G | A |
| TCGA-30-1856 | OBSCN_ENS  | ENST00000284548 | p.L3456L | c.10368G>A | Unverified | GGT | CTG | AGG | 3 | G | A |
| TCGA-24-0975 | OBSCN_ENS  | ENST00000359599 | p.A3087T | c.9259G>A  | Unverified | GAT | GCC | GGG | 1 | G | A |
| TCGA-30-1856 | OBSCN_ENS  | ENST00000359599 | p.L3739L | c.11217G>A | Unverified | GGT | CTG | AGG | 3 | G | A |
| TCGA-30-1856 | OBSCN_ENS  | ENST00000570156 | p.L3640L | c.10920G>A | Unverified | GGT | CTG | AGG | 3 | G | A |
| TCGA-61-1738 | OBSL1_ENS1 | ENST00000404537 | p.A693T  | c.2077G>A  | Unverified | GGT | GCC | CTG | 1 | G | A |
| TCGA-61-1738 | OBSL1_ENS1 | ENST00000404537 | p.A693T  | c.2077G>A  | Unverified | GGT | GCC | CTG | 1 | G | A |
| TCGA-24-1845 | OBSL1_ENS1 | ENST00000404537 | p.P469P  | c.1407G>A  | Unverified | CTG | CCG | GTC | 3 | G | A |
| TCGA-24-2024 | ODF3       | ENST00000325113 | p.T42T   | c.126G>A   | Verified   | CAC | ACG | CCC | 3 | G | A |
| TCGA-23-1022 | ODZ4       | ENST00000278550 | p.G1775D | c.5324G>A  | Verified   | AAC | GGC | ATG | 2 | G | A |
| TCGA-29-1769 | OGDH       | ENST00000222673 | p.G662D  | c.1985G>A  | Unverified | ttt | ggc | tcg | 2 | G | A |
| TCGA-13-0762 | OLFML2A    | ENST00000373580 | p.M122I  | c.366G>A   | Unverified | TCC | ATG | GTG | 3 | G | A |
| TCGA-13-0762 | OLFML2A    | ENST00000373580 | p.M122I  | c.366G>A   | Unverified | TCC | ATG | GTG | 3 | G | A |
| TCGA-24-1846 | OPN1SW     | ENST00000249389 | p.E110K  | c.328G>A   | Unverified | TTG | GAG | GGC | 1 | G | A |
| TCGA-23-2077 | OR10A7     | ENST00000326258 | p.V301I  | c.901G>A   | Verified   | GCT | GTC | AAG | 1 | G | A |
| TCGA-13-0920 | OR10AG1    | ENST00000312345 | p.A194A  | c.582G>A   | Unverified | GTA | GCG | GTG | 3 | G | A |
| TCGA-24-1849 | OR10G9     | ENST00000375024 | p.L45L   | c.135G>A   | Unverified | CTG | CTG | GTG | 3 | G | A |
| TCGA-24-1846 | OR10H4     | ENST00000322107 | p.S138N  | c.413G>A   | Unverified | ATG | AGC | CCC | 2 | G | A |
| TCGA-10-0930 | OR10H4     | ENST00000322107 | p.T162T  | c.486G>A   | Verified   | ACA | ACG | ATA | 3 | G | A |
| TCGA-10-0930 | OR10H4     | ENST00000322107 | p.T162T  | c.486G>A   | Verified   | ACA | ACG | ATA | 3 | G | A |
| TCGA-23-1118 | OR10H5     | ENST00000308940 | p.G41D   | c.122G>A   | Verified   | CTG | GGC | AAC | 2 | G | A |
| TCGA-24-1474 | OR10J3     | ENST00000332217 | p.R22Q   | c.65G>A    | Unverified | AGG | CGG | CAG | 2 | G | A |
| TCGA-24-1850 | OR10Q1     | ENST00000316770 | p.A280T  | c.838G>A   | Unverified | ATC | GCG | TTG | 1 | G | A |
| TCGA-24-1469 | OR10Q1     | ENST00000316770 | p.R241R  | c.723G>A   | Verified   | CGC | CGG | GCC | 3 | G | A |
| TCGA-09-2056 | OR10T2     | ENST00000334438 | p.V84I   | c.250G>A   | Verified   | CTG | GTC | CAC | 1 | G | A |
| TCGA-23-1021 | OR11H12    | ENST00000550708 | p.W36*   | c.107G>A   | Verified   | GAG | TGG | ACA | 2 | G | A |



|              |        |                 |         |          |            |     |     |     |   |   |   |
|--------------|--------|-----------------|---------|----------|------------|-----|-----|-----|---|---|---|
| TCGA-61-2113 | OR13F1 | ENST00000334726 | p.A264T | c.790G>A | Verified   | TCC | GCT | GTA | 1 | G | A |
| TCGA-61-1907 | OR13G1 | ENST00000359688 | p.E108K | c.322G>A | Unverified | GCT | GAG | ATG | 1 | G | A |
| TCGA-29-1783 | OR13H1 | ENST00000338616 | p.V275M | c.823G>A | Unverified | tca | gtg | ttt | 1 | G | A |
| TCGA-24-1417 | OR14J1 | ENST00000377160 | p.C314Y | c.941G>A | Unverified | ATG | TGC | TTA | 2 | G | A |
| TCGA-24-1846 | OR1E1  | ENST00000322608 | p.G16D  | c.47G>A  | Unverified | CTG | GGC | CTG | 2 | G | A |
| TCGA-13-0893 | OR1L6  | ENST00000373684 | p.G290G | c.870G>A | Unverified | TAT | GGG | AGT | 3 | G | A |
| TCGA-24-2280 | OR1S2  | ENST00000302592 | p.V122I | c.364G>A | Unverified | GTC | GTC | ACT | 1 | G | A |
| TCGA-61-1895 | OR2AG1 | ENST00000307401 | p.V77I  | c.229G>A | Unverified | GTT | GTC | ACT | 1 | G | A |
| TCGA-24-1103 | OR2AP1 | ENST00000321688 | p.V210V | c.630G>A | Verified   | CTG | GTG | CTA | 3 | G | A |
| TCGA-23-1111 | OR2J2  | ENST00000377167 | p.A147A | c.441G>A | Unverified | GTT | GCG | GCT | 3 | G | A |
| TCGA-04-1652 | OR2L1P | ENST00000355281 | p.A111A | c.333G>A | Unverified | GAA | GCG | CTG | 3 | G | A |
| TCGA-04-1652 | OR2L1P | ENST00000355281 | p.A111A | c.333G>A | Unverified | GAA | GCG | CTG | 3 | G | A |
| TCGA-13-0883 | OR2M2  | ENST00000359682 | p.S21N  | c.62G>A  | Verified   | CAC | AGC | CCA | 2 | G | A |
| TCGA-04-1331 | OR2M2  | ENST00000359682 | p.M144I | c.432G>A | Verified   | CTT | ATG | GCT | 3 | G | A |
| TCGA-61-1904 | OR2T33 | ENST00000318021 | p.R184H | c.551G>A | Unverified | GTG | CGT | TTG | 2 | G | A |
| TCGA-24-0979 | OR2W3  | ENST00000360358 | p.C169Y | c.506G>A | Verified   | CGC | TGT | GGG | 2 | G | A |
| TCGA-29-1762 | OR2W5  | ENST00000366492 | p.D300N | c.898G>A | Unverified | GGG | GAC | CAT | 1 | G | A |
| TCGA-04-1342 | OR3A1  | ENST00000323404 | p.M214I | c.642G>A | Unverified | CCC | ATG | GCT | 3 | G | A |
| TCGA-29-1769 | OR4C16 | ENST00000314634 | p.R120H | c.359G>A | Unverified | GAC | CGC | TAT | 2 | G | A |
| TCGA-24-1849 | OR4D1  | ENST00000268912 | p.A270T | c.808G>A | Unverified | AAG | GCT | GTG | 1 | G | A |
| TCGA-23-1809 | OR4N2  | ENST00000315947 | p.G170D | c.509G>A | Unverified | TGT | GGC | CCA | 2 | G | A |
| TCGA-61-1899 | OR4N2  | ENST00000315947 | p.R290H | c.869G>A | Unverified | CTT | CGC | AAC | 2 | G | A |
| TCGA-13-1509 | OR51A4 | ENST00000380373 | p.C181Y | c.542G>A | Verified   | TAC | TGT | CTC | 2 | G | A |
| TCGA-24-1474 | OR51B2 | ENST00000328813 | p.V266M | c.796G>A | Verified   | AAT | GTG | CCA | 1 | G | A |
| TCGA-30-1714 | OR51B6 | ENST00000380219 | p.V199I | c.595G>A | Unverified | GTT | GTA | GTT | 1 | G | A |
| TCGA-09-2056 | OR51F2 | ENST00000322110 | p.A316T | c.946G>A | Verified   | AAG | GCC | ATT | 1 | G | A |
| TCGA-13-0886 | OR51G1 | ENST00000321961 | p.A221T | c.661G>A | Unverified | TAC | GCC | CTC | 1 | G | A |
| TCGA-23-1114 | OR52R1 | ENST00000380382 | p.R323H | c.968G>A | Unverified | ACA | CGT | TCC | 2 | G | A |
| TCGA-24-1435 | OR5D16 | ENST00000378396 | p.V282M | c.844G>A | Verified   | ACC | GTG | GTG | 1 | G | A |
| TCGA-29-1761 | OR5D16 | ENST00000378396 | p.V49V  | c.147G>A | Unverified | ATA | GTG | ATC | 3 | G | A |
| TCGA-23-1110 | OR5H2  | ENST00000355273 | p.G21E  | c.62G>A  | Verified   | ACA | GGA | CTT | 2 | G | A |
| TCGA-04-1362 | OR5I1  | ENST00000301532 | p.E198K | c.592G>A | Verified   | AAT | GAG | TGG | 1 | G | A |
| TCGA-04-1347 | OR5K2  | ENST00000427338 | p.V208I | c.622G>A | Verified   | CAA | GTC | TTT | 1 | G | A |
| TCGA-61-1899 | OR5M3  | ENST00000312240 | p.D294N | c.880G>A | Unverified | AAG | GAT | GTG | 1 | G | A |

|              |            |                 |          |           |            |     |     |     |   |   |   |
|--------------|------------|-----------------|----------|-----------|------------|-----|-----|-----|---|---|---|
| TCGA-23-2077 | OR5V1      | ENST00000377154 | p.R261Q  | c.782G>A  | Verified   | GTA | CGG | CCC | 2 | G | A |
| TCGA-23-1117 | OR6X1      | ENST00000327930 | p.L79L   | c.237G>A  | Verified   | AAA | CTG | CTA | 3 | G | A |
| TCGA-23-1117 | OR6X1      | ENST00000327930 | p.L79L   | c.237G>A  | Verified   | AAA | CTG | CTA | 3 | G | A |
| TCGA-13-0807 | OR7C2      | ENST00000248072 | p.V225I  | c.673G>A  | Verified   | TCC | GTC | CTA | 1 | G | A |
| TCGA-20-1687 | OR7C2      | ENST00000248072 | p.T118T  | c.354G>A  | Unverified | ATG | ACG | GCC | 3 | G | A |
| TCGA-13-0916 | OR7C2      | ENST00000248072 | p.T133T  | c.399G>A  | Verified   | TAC | ACG | GTC | 3 | G | A |
| TCGA-13-1501 | OR7D4      | ENST00000308682 | p.E173K  | c.517G>A  | Verified   | ACT | GAG | ATT | 1 | G | A |
| TCGA-13-1501 | OR7D4      | ENST00000308682 | p.E173K  | c.517G>A  | Verified   | ACT | GAG | ATT | 1 | G | A |
| TCGA-09-2050 | OR7D4      | ENST00000308682 | p.M81I   | c.243G>A  | Verified   | AAG | ATG | CTA | 3 | G | A |
| TCGA-13-0893 | OR8B3      | ENST00000354597 | p.R122H  | c.365G>A  | Verified   | GAT | CGC | TAT | 2 | G | A |
| TCGA-23-1021 | OR8U1      | ENST00000302270 | p.G44D   | c.131G>A  | Verified   | TTG | GGT | TTG | 2 | G | A |
| TCGA-29-1761 | ORC1       | ENST00000371568 | p.R844Q  | c.2531G>A | Unverified | ctt | cgg | gtg | 2 | G | A |
| TCGA-24-1423 | OSBPL1A    | ENST00000319481 | p.A660T  | c.1978G>A | Verified   | CAT | GCT | GAA | 1 | G | A |
| TCGA-23-2078 | OSCP1      | ENST00000356637 | p.G250R  | c.748G>A  | Unverified | TAT | GGA | GAC | 1 | G | A |
| TCGA-13-0792 | OSCP1      | ENST00000356637 | p.R252Q  | c.755G>A  | Verified   | GAC | CGA | GTC | 2 | G | A |
| TCGA-23-2078 | OSR2       | ENST00000297565 | p.E128E  | c.384G>A  | Unverified | CAA | GAG | GAT | 3 | G | A |
| TCGA-04-1338 | OTOA       | ENST00000388958 | p.A705T  | c.2113G>A | Verified   | AGG | GCT | TGG | 1 | G | A |
| TCGA-20-1686 | OTOF       | ENST00000272371 | p.A1063A | c.3189G>A | Unverified | GAG | GCG | TAC | 3 | G | A |
| TCGA-20-1686 | OTOF_ENSTI | ENST00000339598 | p.A316A  | c.948G>A  | Unverified | GAG | GCG | TAC | 3 | G | A |
| TCGA-20-1686 | OTOF_ENSTI | ENST00000402415 | p.A373A  | c.1119G>A | Unverified | GAG | GCG | TAC | 3 | G | A |
| TCGA-04-1649 | OTOL1      | ENST00000327928 | p.R319Q  | c.956G>A  | Unverified | GTC | CGA | GGC | 2 | G | A |
| TCGA-13-0755 | OTOP1      | ENST00000296358 | p.R370Q  | c.1109G>A | Verified   | ATC | CGG | ATT | 2 | G | A |
| TCGA-04-1655 | OTOP1      | ENST00000296358 | p.S345S  | c.1035G>A | Unverified | GAG | TCG | GCA | 3 | G | A |
| TCGA-24-1435 | OTOR       | ENST00000246081 | p.D54N   | c.160G>A  | Verified   | ccg | gac | tgt | 1 | G | A |
| TCGA-23-2077 | OVGP1      | ENST00000369732 | p.G259R  | c.775G>A  | Verified   | ATG | GGG | ATC | 1 | G | A |
| TCGA-23-2078 | OXGR1      | ENST00000298440 | p.V252I  | c.754G>A  | Verified   | TAC | GTA | TGT | 1 | G | A |
| TCGA-23-1110 | P2RY1      | ENST00000305097 | p.T13T   | c.39G>A   | Unverified | GGG | ACG | GAC | 3 | G | A |
| TCGA-13-0887 | PABPN1     | ENST00000216727 | p.G283S  | c.847G>A  | Verified   | AGT | GGT | TTT | 1 | G | A |
| TCGA-23-1122 | PADI1      | ENST00000375471 | p.V418I  | c.1252G>A | Unverified | CCC | GTC | ACG | 1 | G | A |
| TCGA-29-1770 | PADI4      | ENST00000375448 | p.L151L  | c.453G>A  | Unverified | CTG | CTG | GTG | 3 | G | A |
| TCGA-23-1116 | PADI6      | ENST00000358481 | p.P467P  | c.1401G>A | Unverified | GCG | CCG | GTG | 3 | G | A |
| TCGA-04-1336 | PAK2       | ENST00000327134 | p.E8K    | c.22G>A   | Verified   | CTG | GAA | GAT | 1 | G | A |
| TCGA-13-0760 | PAK4       | ENST00000358301 | p.L566L  | c.1698G>A | Verified   | gag | ctg | ctg | 3 | G | A |
| TCGA-13-1408 | PALM2-AKA  | ENST00000374530 | p.A641T  | c.1921G>A | Verified   | ACA | GCC | TCT | 1 | G | A |

|              |            |                 |          |           |            |     |     |     |   |   |   |
|--------------|------------|-----------------|----------|-----------|------------|-----|-----|-----|---|---|---|
| TCGA-61-1900 | PAPD7      | ENST00000230859 | p.D142N  | c.424G>A  | Unverified | AGG | GAC | CTG | 1 | G | A |
| TCGA-25-1318 | PAPPA2     | ENST00000367662 | p.E1596K | c.4786G>A | Verified   | TGT | GAG | CCA | 1 | G | A |
| TCGA-25-1318 | PAPPA2     | ENST00000367662 | p.E1596K | c.4786G>A | Verified   | TGT | GAG | CCA | 1 | G | A |
| TCGA-30-1855 | PAPSS1     | ENST00000265174 | p.R139H  | c.416G>A  | Unverified | GAT | CGC | AAC | 2 | G | A |
| TCGA-04-1530 | PARP1      | ENST00000366794 | p.M615I  | c.1845G>A | Verified   | TTC | ATG | AAA | 3 | G | A |
| TCGA-61-2012 | PARP10     | ENST00000313028 | p.V53I   | c.157G>A  | Unverified | GGC | GTC | CTC | 1 | G | A |
| TCGA-24-0979 | PARP15     | ENST00000310366 | p.S343N  | c.1028G>A | Verified   | AGA | AGT | TGT | 2 | G | A |
| TCGA-13-1488 | PASK       | ENST00000234040 | p.R298K  | c.893G>A  | Verified   | CAG | AGG | TCT | 2 | G | A |
| TCGA-13-0714 | PAX3       | ENST00000392069 | p.R236H  | c.707G>A  | Verified   | GAG | CGT | GCT | 2 | G | A |
| TCGA-61-1915 | PAXIP1     | NM_007349.2     | p.V127M  | c.379G>A  | Unverified | att | gtg | act | 1 | G | A |
| TCGA-20-1683 | PAXIP1     | NM_007349.2     | p.P381P  | c.1143G>A | Unverified | cac | ccg | gtt | 3 | G | A |
| TCGA-61-1915 | PAXIP1_ENS | ENST00000404141 | p.V161M  | c.481G>A  | Unverified | ATT | GTG | ACT | 1 | G | A |
| TCGA-20-1683 | PAXIP1_ENS | ENST00000404141 | p.P415P  | c.1245G>A | Unverified | CAC | CCG | GTT | 3 | G | A |
| TCGA-13-0886 | PCDH1      | ENST00000287008 | p.L238L  | c.714G>A  | Verified   | AAC | CTG | GAC | 3 | G | A |
| TCGA-13-0760 | PCDH17     | ENST00000377918 | p.D703N  | c.2107G>A | Verified   | TGG | GAC | ATG | 1 | G | A |
| TCGA-29-1703 | PCDH19     | ENST00000373034 | p.R980H  | c.2939G>A | Unverified | ATC | CGT | TCC | 2 | G | A |
| TCGA-29-1703 | PCDH19_NM  | NM_020766.1     | p.R433H  | c.1298G>A | Unverified | atc | cgt | tcc | 2 | G | A |
| TCGA-24-1469 | PCDH9      | ENST00000377865 | p.G1075D | c.3224G>A | Unverified | GTG | GGT | AGT | 2 | G | A |
| TCGA-61-1906 | PCDH9      | ENST00000377865 | p.K762K  | c.2286G>A | Unverified | CCT | AAG | TCT | 3 | G | A |
| TCGA-61-1906 | PCDH9      | ENST00000377865 | p.K762K  | c.2286G>A | Unverified | CCT | AAG | TCT | 3 | G | A |
| TCGA-23-1122 | PCDHA10    | ENST00000506939 | p.A453A  | c.1359G>A | Verified   | CCT | GCG | TTC | 3 | G | A |
| TCGA-13-1499 | PCDHA10_E  | ENST00000505235 | p.A704T  | c.2110G>A | Verified   | TGC | GCG | GTG | 1 | G | A |
| TCGA-23-1122 | PCDHA10_E  | ENST00000505235 | p.A453A  | c.1359G>A | Verified   | CCT | GCG | TTC | 3 | G | A |
| TCGA-09-0369 | PCDHA2     | ENST00000378132 | p.V624M  | c.1870G>A | Verified   | CGC | GTG | GGG | 1 | G | A |
| TCGA-09-0369 | PCDHA2     | ENST00000378132 | p.V624M  | c.1870G>A | Verified   | CGC | GTG | GGG | 1 | G | A |
| TCGA-29-1702 | PCDHA4     | ENST00000356878 | p.R244K  | c.731G>A  | Unverified | GAC | AGA | ACC | 2 | G | A |
| TCGA-24-2280 | PCDHA4     | ENST00000356878 | p.L435L  | c.1305G>A | Unverified | TCG | CTG | TGG | 3 | G | A |
| TCGA-29-1702 | PCDHA4_EN  | ENST00000530339 | p.R244K  | c.731G>A  | Unverified | GAC | AGA | ACC | 2 | G | A |
| TCGA-24-1469 | PCDHA5     | ENST00000378126 | p.V397V  | c.1191G>A | Verified   | CTG | GTG | TCC | 3 | G | A |
| TCGA-13-0791 | PCDHA7     | ENST00000378125 | p.P469P  | c.1407G>A | Verified   | AAC | CCG | CCG | 3 | G | A |
| TCGA-13-0793 | PCDHAC1    | ENST00000253807 | p.A19A   | c.57G>A   | Unverified | GCA | GCG | GGA | 3 | G | A |
| TCGA-24-1849 | PCDHB10    | ENST00000239446 | p.D51N   | c.151G>A  | Unverified | AAG | GAT | CTG | 1 | G | A |
| TCGA-61-1738 | PCDHB10    | ENST00000239446 | p.A515T  | c.1543G>A | Unverified | TTC | GCC | CTC | 1 | G | A |
| TCGA-61-1738 | PCDHB10    | ENST00000239446 | p.A515T  | c.1543G>A | Unverified | TTC | GCC | CTC | 1 | G | A |

|              |           |                 |          |            |            |     |     |     |   |   |   |
|--------------|-----------|-----------------|----------|------------|------------|-----|-----|-----|---|---|---|
| TCGA-09-0369 | PCDHB11   | ENST00000354757 | p.V364M  | c.1090G>A  | Verified   | ACC | GTG | GTT | 1 | G | A |
| TCGA-09-0369 | PCDHB11   | ENST00000354757 | p.V364M  | c.1090G>A  | Verified   | ACC | GTG | GTT | 1 | G | A |
| TCGA-13-1509 | PCDHB18   | ENST00000274705 | p.E246K  | c.736G>A   | Verified   | GGC | GAA | GTC | 1 | G | A |
| TCGA-24-1845 | PCDHB18   | ENST00000274705 | p.D319N  | c.955G>A   | Unverified | CGA | GAC | CAA | 1 | G | A |
| TCGA-61-1895 | PCDHB3    | ENST00000231130 | p.A681T  | c.2041G>A  | Unverified | CAG | GCC | CAG | 1 | G | A |
| TCGA-13-0913 | PCDHB5    | ENST00000231134 | p.R202Q  | c.605G>A   | Verified   | GAC | CGG | GAG | 2 | G | A |
| TCGA-23-1116 | PCDHB5    | ENST00000231134 | p.G510D  | c.1529G>A  | Unverified | AAC | GGC | CAC | 2 | G | A |
| TCGA-24-1422 | PCDHB6    | ENST00000231136 | p.L548L  | c.1644G>A  | Unverified | TTG | CTG | GTG | 3 | G | A |
| TCGA-23-1022 | PCDHB7    | ENST00000231137 | p.A579A  | c.1737G>A  | Verified   | CGG | GCG | GCC | 3 | G | A |
| TCGA-23-1124 | PCDHGA1   | ENST00000378105 | p.A637A  | c.1911G>A  | Verified   | GAC | GCG | CTC | 3 | G | A |
| TCGA-24-1844 | PCDHGA6_E | ENST00000517434 | p.E463K  | c.1387G>A  | Unverified | CTT | GAA | AAC | 1 | G | A |
| TCGA-04-1652 | PCDHGB2_E | ENST00000522605 | p.S360S  | c.1080G>A  | Unverified | GAT | TCG | CCA | 3 | G | A |
| TCGA-04-1652 | PCDHGB2_E | ENST00000522605 | p.S360S  | c.1080G>A  | Unverified | GAT | TCG | CCA | 3 | G | A |
| TCGA-61-1998 | PCDHGB7   | ENST00000398594 | p.V333I  | c.997G>A   | Verified   | AAA | GTA | ATT | 1 | G | A |
| TCGA-29-1702 | PCK1      | ENST00000319441 | p.T384T  | c.1152G>A  | Unverified | ATC | ACG | TCC | 3 | G | A |
| TCGA-04-1331 | PCLO      | ENST00000333891 | p.A4321T | c.12961G>A | Verified   | GAG | GCT | GAA | 1 | G | A |
| TCGA-13-1488 | PCLO      | ENST00000333891 | p.Q568Q  | c.1704G>A  | Verified   | CTG | CAG | CCA | 3 | G | A |
| TCGA-24-1849 | PCNXL2    | ENST00000258229 | p.R2012Q | c.6035G>A  | Unverified | GAG | CGG | GCC | 2 | G | A |
| TCGA-25-2398 | PDE1B     | ENST00000243052 | p.V478M  | c.1432G>A  | Verified   | GAT | GTG | GTC | 1 | G | A |
| TCGA-23-1122 | PDE4A     | ENST00000344979 | p.E162K  | c.484G>A   | Unverified | CAG | GAG | CGG | 1 | G | A |
| TCGA-10-0930 | PDE8A     | ENST00000310298 | p.L121L  | c.363G>A   | Verified   | TTC | CTG | GAC | 3 | G | A |
| TCGA-10-0930 | PDE8A     | ENST00000310298 | p.L121L  | c.363G>A   | Verified   | TTC | CTG | GAC | 3 | G | A |
| TCGA-24-1844 | PDGFD     | ENST00000393158 | p.D261N  | c.781G>A   | Unverified | CTG | GAT | AGG | 1 | G | A |
| TCGA-24-1844 | PDGFD_ENS | ENST00000393158 | p.D261N  | c.781G>A   | Unverified | CTG | GAT | AGG | 1 | G | A |
| TCGA-24-2280 | PDGFRA    | ENST00000257290 | p.G185E  | c.554G>A   | Unverified | GTA | GGG | CCC | 2 | G | A |
| TCGA-23-2078 | PDHA1     | ENST00000422285 | p.L24L   | c.72G>A    | Verified   | gtg | ctg | gta | 3 | G | A |
| TCGA-29-1784 | PDIA5     | ENST00000316218 | p.K167K  | c.501G>A   | Unverified | CTG | AAG | AAG | 3 | G | A |
| TCGA-36-1577 | PDK3      | ENST00000379162 | p.V193M  | c.577G>A   | Verified   | AAC | GTG | GCG | 1 | G | A |
| TCGA-61-1895 | PDLIM1    | ENST00000329399 | p.E208K  | c.622G>A   | Unverified | AAT | GAG | CCC | 1 | G | A |
| TCGA-13-0760 | PDLIM4    | ENST00000253754 | p.R299R  | c.897G>A   | Verified   | GAG | CGG | CTC | 3 | G | A |
| TCGA-13-0905 | PDZD2     | ENST00000282493 | p.C2022Y | c.6065G>A  | Verified   | AAG | TGT | AGA | 2 | G | A |
| TCGA-30-1856 | PECR      | ENST00000265322 | p.G42E   | c.125G>A   | Unverified | CTG | GGG | AGT | 2 | G | A |
| TCGA-13-1488 | PEG3      | ENST00000326441 | p.D1460N | c.4378G>A  | Verified   | GAA | GAC | CCA | 1 | G | A |
| TCGA-04-1337 | PEG3      | ENST00000326441 | p.R598H  | c.1793G>A  | Unverified | GAA | CGT | GAA | 2 | G | A |

|              |           |                 |          |           |            |     |     |     |   |   |   |
|--------------|-----------|-----------------|----------|-----------|------------|-----|-----|-----|---|---|---|
| TCGA-24-0975 | PELO      | ENST00000274311 | p.W27*   | c.81G>A   | Unverified | ATG | TGG | CAC | 3 | G | A |
| TCGA-13-1512 | PEX1      | ENST00000248633 | p.V223V  | c.669G>A  | Verified   | ACT | GTG | GGA | 3 | G | A |
| TCGA-23-1029 | PEX5L     | ENST00000467460 | p.G204E  | c.611G>A  | Unverified | ACT | GGA | TCA | 2 | G | A |
| TCGA-10-0930 | PFAS      | ENST00000314666 | p.P133P  | c.399G>A  | Verified   | CCC | CCG | TCA | 3 | G | A |
| TCGA-10-0930 | PFAS      | ENST00000314666 | p.P133P  | c.399G>A  | Verified   | CCC | CCG | TCA | 3 | G | A |
| TCGA-13-0792 | PFKP      | ENST00000381125 | p.M758I  | c.2274G>A | Unverified | CTC | ATG | AAA | 3 | G | A |
| TCGA-61-1740 | PFN4      | ENST00000313213 | p.G37S   | c.109G>A  | Unverified | CCA | GGT | TTC | 1 | G | A |
| TCGA-23-1118 | PGLYRP3   | ENST00000290722 | p.A17T   | c.49G>A   | Verified   | CAG | GCT | TGG | 1 | G | A |
| TCGA-29-1763 | PGM5      | ENST00000396396 | p.R560R  | c.1680G>A | Unverified | GGC | CGG | AGG | 3 | G | A |
| TCGA-24-1474 | PHACTR2   | ENST00000305766 | p.R395Q  | c.1184G>A | Verified   | CGC | CGG | AGG | 2 | G | A |
| TCGA-23-2078 | PHACTR3   | ENST00000371015 | p.D168N  | c.502G>A  | Unverified | CTG | GAC | AAG | 1 | G | A |
| TCGA-13-1510 | PHACTR3   | ENST00000371015 | p.R49H   | c.146G>A  | Verified   | GCG | CGT | CCT | 2 | G | A |
| TCGA-13-0792 | PHC1      | ENST00000251757 | p.A101T  | c.301G>A  | Verified   | CAG | GCC | TCG | 1 | G | A |
| TCGA-29-1691 | PHF12     | ENST00000332830 | p.C842Y  | c.2525G>A | Unverified | GCC | TGC | ATA | 2 | G | A |
| TCGA-13-1509 | PHF21B    | ENST00000313237 | p.A280T  | c.838G>A  | Verified   | ATC | GCC | TTC | 1 | G | A |
| TCGA-13-0886 | PHF8      | ENST00000338154 | p.E411K  | c.1231G>A | Verified   | aaa | gaa | gct | 1 | G | A |
| TCGA-61-1725 | PHIP      | ENST00000275034 | p.K1657K | c.4971G>A | Unverified | CAC | AAG | AAA | 3 | G | A |
| TCGA-29-1762 | PHLDB2    | ENST00000412622 | p.R1080Q | c.3239G>A | Unverified | TTG | CGG | AGC | 2 | G | A |
| TCGA-29-1762 | PHLDB2_EN | ENST00000393923 | p.R1107Q | c.3320G>A | Unverified | TTG | CGG | AGC | 2 | G | A |
| TCGA-29-1762 | PHLDB2_EN | ENST00000431670 | p.R1123Q | c.3368G>A | Unverified | TTG | CGG | AGC | 2 | G | A |
| TCGA-25-1313 | PI4KA     | NM_058004.1     | p.S1526N | c.4577G>A | Unverified | gtt | agt | gat | 2 | G | A |
| TCGA-29-1691 | PI4KB     | ENST00000368875 | p.G38E   | c.113G>A  | Unverified | AAT | GGG | GGG | 2 | G | A |
| TCGA-24-1616 | PICALM    | ENST00000447890 | p.V634I  | c.1900G>A | Verified   | CCT | GTC | ATG | 1 | G | A |
| TCGA-29-1769 | PIGF      | ENST00000281382 | p.W138*  | c.414G>A  | Unverified | gca | tgg | cta | 3 | G | A |
| TCGA-23-2078 | PIGG      | ENST00000310340 | p.M837I  | c.2511G>A | Unverified | GTG | ATG | CAT | 3 | G | A |
| TCGA-25-2393 | PIGK      | ENST00000370812 | p.S278N  | c.833G>A  | Verified   | AAA | AGT | CTG | 2 | G | A |
| TCGA-13-1488 | PIGO      | ENST00000378617 | p.R854H  | c.2561G>A | Verified   | gag | cgc | atc | 2 | G | A |
| TCGA-61-2109 | PIGO      | ENST00000378617 | p.R745Q  | c.2234G>A | Unverified | cct | cgg | gct | 2 | G | A |
| TCGA-61-1737 | PIGX      | ENST00000314118 | p.V67M   | c.199G>A  | Unverified | GCA | GTG | ATG | 1 | G | A |
| TCGA-24-0979 | PIK3AP1   | ENST00000339364 | p.G618S  | c.1852G>A | Verified   | CTG | GGC | ATT | 1 | G | A |
| TCGA-13-1510 | PIK3C2A   | ENST00000265970 | p.V600I  | c.1798G>A | Unverified | TCA | GTA | AAG | 1 | G | A |
| TCGA-29-1775 | PIK3CG    | ENST00000440650 | p.K455K  | c.1365G>A | Unverified | TCC | AAG | GGC | 3 | G | A |
| TCGA-61-2109 | PIK3R4    | ENST00000356763 | p.G609D  | c.1826G>A | Unverified | gtt | ggc | tgg | 2 | G | A |
| TCGA-24-1847 | PIP       | ENST00000291009 | p.A57T   | c.169G>A  | Unverified | CTT | GCA | GTT | 1 | G | A |

|              |            |                 |          |             |            |     |     |     |   |   |   |
|--------------|------------|-----------------|----------|-------------|------------|-----|-----|-----|---|---|---|
| TCGA-24-1616 | PIRT       | ENST00000580256 | p.M3I    | c.9G>A      | Verified   | ACG | ATG | GAG | 3 | G | A |
| TCGA-13-1507 | PITPNA     | ENST00000313486 | p.V136M  | c.406G>A    | Verified   | CAC | GTG | GAA | 1 | G | A |
| TCGA-13-0791 | PITPNM2    | ENST00000320201 | p.T1092T | c.3276G>A   | Verified   | CAC | ACG | TTT | 3 | G | A |
| TCGA-24-1563 | PITRM1     | ENST00000380989 | p.E107E  | c.321G>A    | Unverified | CTT | GAG | CAT | 3 | G | A |
| TCGA-23-1116 | PKD1L1     | ENST00000289672 | p.R1907H | c.5720G>A   | Unverified | GGT | CGC | GTG | 2 | G | A |
| TCGA-23-2077 | PKD1L2_ENS | ENST00000525539 | p.C1355Y | c.4064G>A   | Verified   | CTG | TGT | GTG | 2 | G | A |
| TCGA-20-1686 | PKD2L1     | ENST00000318222 | p.M121I  | c.363G>A    | Unverified | GGA | ATG | ACA | 3 | G | A |
| TCGA-24-1469 | PKHD1      | ENST00000371117 | p.R1804H | c.5411G>A   | Verified   | AAG | CGT | GAG | 2 | G | A |
| TCGA-24-1850 | PKHD1      | ENST00000371117 | p.A1826A | c.5478G>A   | Unverified | ATG | GCG | ACA | 3 | G | A |
| TCGA-24-1850 | PKHD1_ENS  | ENST00000340994 | p.A1826A | c.5478G>A   | Unverified | ATG | GCG | ACA | 3 | G | A |
| TCGA-23-1122 | PKHD1L1    | ENST00000378402 | p.V1277M | c.3829G>A   | Verified   | GCG | GTG | TAT | 1 | G | A |
| TCGA-13-1507 | PKHD1L1    | ENST00000378402 | p.C1884Y | c.5651G>A   | Verified   | TAC | TGC | CGC | 2 | G | A |
| TCGA-04-1356 | PKHD1L1    | ENST00000378402 | p.Q4100Q | c.12300G>A  | Verified   | GGA | CAG | CCA | 3 | G | A |
| TCGA-23-1021 | PKN1       | ENST00000242783 | p.E764K  | c.2290G>A   | Verified   | AAG | GAG | GGG | 1 | G | A |
| TCGA-09-2050 | PKNOX2     | ENST00000298282 | p.Q388Q  | c.1164G>A   | Verified   | CAG | CAG | GGC | 3 | G | A |
| TCGA-13-0900 | PKP1       | ENST00000367324 | p.S494N  | c.1481G>A   | Verified   | TTC | AGC | AAC | 2 | G | A |
| TCGA-13-0755 | PKP4       | ENST00000389759 | p.V743M  | c.2227G>A   | Verified   | TGC | GTG | TGC | 1 | G | A |
| TCGA-13-0905 | PKP4       | ENST00000389759 | p.A703T  | c.2107G>A   | Verified   | TCC | GCG | GGG | 1 | G | A |
| TCGA-23-1123 | PKP4       | ENST00000389759 | p.S336S  | c.1008G>A   | Verified   | TCG | TCG | TCC | 3 | G | A |
| TCGA-23-1123 | PKP4       | ENST00000389759 | p.S336S  | c.1008G>A   | Verified   | TCG | TCG | TCC | 3 | G | A |
| TCGA-30-1714 | PLA2G4C    | ENST00000413144 | p.V511I  | c.1531G>A   | Unverified | AAT | GTC | AGG | 1 | G | A |
| TCGA-23-1022 | PLA2G6     | ENST00000332509 | p.C705Y  | c.2114G>A   | Verified   | ACC | TGT | GTG | 2 | G | A |
| TCGA-61-2009 | PLA2R1     | ENST00000283243 | p.?      | c.2401+1G>A | Verified   | AGA | GAT | GTG | 1 | G | A |
| TCGA-09-2056 | PLB1       | ENST00000327757 | p.E321K  | c.961G>A    | Verified   | GAT | GAG | CCA | 1 | G | A |
| TCGA-25-1313 | PLCB1      | ENST00000338037 | p.E539K  | c.1615G>A   | Verified   | gaa | gaa | atg | 1 | G | A |
| TCGA-13-0883 | PLCB2      | ENST00000260402 | p.G193D  | c.578G>A    | Verified   | AAA | GGC | AAA | 2 | G | A |
| TCGA-23-1124 | PLCB3      | ENST00000279230 | p.R707Q  | c.2120G>A   | Verified   | CGG | CGG | CCG | 2 | G | A |
| TCGA-24-0979 | PLCXD3     | ENST00000377801 | p.G167R  | c.499G>A    | Unverified | tat | gga | aat | 1 | G | A |
| TCGA-04-1342 | PLEC       | ENST00000322810 | p.R800Q  | c.2399G>A   | Unverified | ATG | CGG | GAG | 2 | G | A |
| TCGA-09-1674 | PLEKHA4    | ENST00000263265 | p.R190H  | c.569G>A    | Unverified | GGG | CGC | ATC | 2 | G | A |
| TCGA-04-1331 | PLEKHF1    | ENST00000436066 | p.G138S  | c.412G>A    | Unverified | ACG | GGC | CGC | 1 | G | A |
| TCGA-09-2049 | PLEKHF2    | ENST00000315367 | p.D240N  | c.718G>A    | Verified   | TCT | GAT | GAT | 1 | G | A |
| TCGA-61-1998 | PLEKHM3    | ENST00000427836 | p.W228*  | c.684G>A    | Verified   | TAC | TGG | CAA | 3 | G | A |
| TCGA-29-1762 | PLG        | ENST00000308192 | p.W334*  | c.1001G>A   | Unverified | CCA | TGG | TGC | 2 | G | A |

|              |            |                 |          |           |            |     |     |     |   |   |   |
|--------------|------------|-----------------|----------|-----------|------------|-----|-----|-----|---|---|---|
| TCGA-29-1703 | PLK1       | ENST00000300093 | p.R262Q  | c.785G>A  | Unverified | CTC | CGG | ATC | 2 | G | A |
| TCGA-04-1542 | PLOD1      | ENST00000196061 | p.V218M  | c.652G>A  | Verified   | GTC | GTG | CTC | 1 | G | A |
| TCGA-29-1777 | PLXDC2     | ENST00000377252 | p.L97L   | c.291G>A  | Unverified | CTG | CTG | GAT | 3 | G | A |
| TCGA-61-1738 | PLXNA3     | ENST00000369682 | p.A580A  | c.1740G>A | Unverified | gcg | gcg | gag | 3 | G | A |
| TCGA-61-1738 | PLXNA3     | ENST00000369682 | p.A580A  | c.1740G>A | Unverified | gcg | gcg | gag | 3 | G | A |
| TCGA-29-1691 | PLXNA4_EN: | ENST00000321063 | p.V658I  | c.1972G>A | Unverified | AGC | GTC | CAC | 1 | G | A |
| TCGA-61-1725 | PLXNA4_EN: | ENST00000321063 | p.G1174G | c.3522G>A | Unverified | GCT | GGG | GGC | 3 | G | A |
| TCGA-29-1691 | PLXNA4_EN: | ENST00000321063 | p.V658I  | c.1972G>A | Unverified | AGC | GTC | CAC | 1 | G | A |
| TCGA-61-1725 | PLXNA4_EN: | ENST00000321063 | p.G1174G | c.3522G>A | Unverified | GCT | GGG | GGC | 3 | G | A |
| TCGA-23-1022 | PLXNC1     | ENST00000258526 | p.V430I  | c.1288G>A | Verified   | CTC | GTT | CCT | 1 | G | A |
| TCGA-10-0930 | PMFBP1     | ENST00000237353 | p.K248K  | c.744G>A  | Verified   | CAA | AAG | GTC | 3 | G | A |
| TCGA-10-0930 | PMFBP1     | ENST00000237353 | p.K248K  | c.744G>A  | Verified   | CAA | AAG | GTC | 3 | G | A |
| TCGA-24-1845 | PMS2P3     | NM_005395.2     | p.G59R   | c.175G>A  | Unverified | cat | gga | gtg | 1 | G | A |
| TCGA-24-1431 | PNISR      | ENST00000369239 | p.A234T  | c.700G>A  | Unverified | CCC | GCT | TGG | 1 | G | A |
| TCGA-29-1770 | PNMAL2_EN  | ENST00000599531 | p.A393A  | c.1179G>A | Unverified | GAG | GCG | GGC | 3 | G | A |
| TCGA-20-1687 | PODN       | ENST00000312553 | p.R428H  | c.1283G>A | Unverified | CCT | CGC | CGC | 2 | G | A |
| TCGA-24-2290 | PODXL2     | ENST00000342480 | p.G339R  | c.1015G>A | Verified   | CCT | GGA | GAC | 1 | G | A |
| TCGA-24-2290 | PODXL2     | ENST00000342480 | p.G339R  | c.1015G>A | Verified   | CCT | GGA | GAC | 1 | G | A |
| TCGA-23-1122 | POGZ       | ENST00000271715 | p.G192D  | c.575G>A  | Verified   | CCA | GGT | ACC | 2 | G | A |
| TCGA-61-2012 | POLG       | ENST00000268124 | p.V825M  | c.2473G>A | Verified   | gct | gtg | atc | 1 | G | A |
| TCGA-23-2078 | POLM       | ENST00000242248 | p.R175H  | c.524G>A  | Verified   | ggc | cgc | ctc | 2 | G | A |
| TCGA-61-2012 | POLR1A     | ENST00000263857 | p.Q1526Q | c.4578G>A | Verified   | TGC | CAG | GTG | 3 | G | A |
| TCGA-24-1604 | POLR1B     | ENST00000263331 | p.L619L  | c.1857G>A | Verified   | AGA | CTG | GTA | 3 | G | A |
| TCGA-61-1740 | POLR2B     | ENST00000381227 | p.R425Q  | c.1274G>A | Unverified | GAT | CGA | GGA | 2 | G | A |
| TCGA-61-1904 | POLR3B     | ENST00000228347 | p.G690R  | c.2068G>A | Unverified | ATG | GGG | AAA | 1 | G | A |
| TCGA-61-1904 | POM121     | ENST00000257622 | p.G234S  | c.700G>A  | Unverified | cct | ggc | agc | 1 | G | A |
| TCGA-61-1904 | POM121_EN  | ENST00000395270 | p.G234S  | c.700G>A  | Unverified | CCT | GGC | AGC | 1 | G | A |
| TCGA-04-1649 | POM121L12  | ENST00000408890 | p.A142A  | c.426G>A  | Unverified | ATC | GCG | CCC | 3 | G | A |
| TCGA-13-1501 | POP1       | ENST00000349693 | p.L812L  | c.2436G>A | Verified   | TTA | CTG | AAG | 3 | G | A |
| TCGA-13-1501 | POP1       | ENST00000349693 | p.L812L  | c.2436G>A | Verified   | TTA | CTG | AAG | 3 | G | A |
| TCGA-25-2400 | POPDC3     | ENST00000254765 | p.R261R  | c.783G>A  | Verified   | ATT | CGG | CTA | 3 | G | A |
| TCGA-29-1695 | POT1       | ENST00000357628 | p.A6T    | c.16G>A   | Unverified | CCA | GCA | ACA | 1 | G | A |
| TCGA-29-1695 | POT1_ENST  | ENST00000357628 | p.A6T    | c.16G>A   | Unverified | CCA | GCA | ACA | 1 | G | A |
| TCGA-20-1686 | POTED      | ENST00000299443 | p.K171K  | c.513G>A  | Unverified | GAC | AAG | GAA | 3 | G | A |

|              |           |                 |          |           |            |     |     |     |   |   |   |
|--------------|-----------|-----------------|----------|-----------|------------|-----|-----|-----|---|---|---|
| TCGA-04-1652 | POU2F3    | ENST00000260264 | p.P93P   | c.279G>A  | Unverified | CAT | CCG | CTC | 3 | G | A |
| TCGA-04-1652 | POU2F3    | ENST00000260264 | p.P93P   | c.279G>A  | Unverified | CAT | CCG | CTC | 3 | G | A |
| TCGA-29-1695 | PPARGC1A  | ENST00000264867 | p.G682S  | c.2044G>A | Unverified | gtc | ggt | aaa | 1 | G | A |
| TCGA-13-0900 | PPFIA1    | ENST00000253925 | p.R137Q  | c.410G>A  | Verified   | gag | cgg | tct | 2 | G | A |
| TCGA-24-1435 | PPFIA4    | XM_046751.7     | p.M1120I | c.3360G>A | Verified   | cgc | atg | ctg | 3 | G | A |
| TCGA-24-1463 | PPIAL4G   | ENST00000419275 | p.V136V  | c.408G>A  | Unverified | CGT | GTG | AAT | 3 | G | A |
| TCGA-04-1356 | PPL       | ENST00000345988 | p.L767L  | c.2301G>A | Verified   | AAG | CTG | AAG | 3 | G | A |
| TCGA-09-1674 | PPP1R21   | ENST00000294952 | p.E366K  | c.1096G>A | Unverified | GAA | GAA | GAA | 1 | G | A |
| TCGA-13-0714 | PPP1R3A   | NM_002711.2     | p.V1102I | c.3304G>A | Verified   | tac | gtt | ttg | 1 | G | A |
| TCGA-13-0906 | PPP2R5B   | ENST00000164133 | p.K331K  | c.993G>A  | Verified   | cag | aag | gag | 3 | G | A |
| TCGA-09-1674 | PPPDE1    | ENST00000302550 | p.G58R   | c.172G>A  | Unverified | CCA | GGA | AAT | 1 | G | A |
| TCGA-61-1733 | PQLC2     | ENST00000375155 | p.W23*   | c.68G>A   | Unverified | ATA | TGG | GAT | 2 | G | A |
| TCGA-61-1733 | PQLC2     | ENST00000375155 | p.W23*   | c.68G>A   | Unverified | ATA | TGG | GAT | 2 | G | A |
| TCGA-29-1705 | PRAMEF1   | ENST00000332296 | p.P464P  | c.1392G>A | Unverified | TCA | CCG | TCT | 3 | G | A |
| TCGA-29-1705 | PRAMEF2   | ENST00000240189 | p.P464P  | c.1392G>A | Unverified | TCA | CCG | TCT | 3 | G | A |
| TCGA-29-1766 | PRAMEF7   | ENST00000330881 | p.R444R  | c.1332G>A | Unverified | TTA | AGG | CAG | 3 | G | A |
| TCGA-29-1769 | PRB2      | ENST00000389362 | p.G223E  | c.668G>A  | Unverified | CAA | GGA | CCA | 2 | G | A |
| TCGA-29-1769 | PRB2_ENST | ENST00000389362 | p.G244E  | c.731G>A  | Unverified | CAA | GGA | CCA | 2 | G | A |
| TCGA-25-1313 | PRDM14    | ENST00000276594 | p.V328I  | c.982G>A  | Verified   | TAT | GTC | AAC | 1 | G | A |
| TCGA-24-1844 | PRDM9     | ENST00000296682 | p.A41T   | c.121G>A  | Unverified | TGG | GCA | GAG | 1 | G | A |
| TCGA-61-1998 | PRDM9     | ENST00000296682 | p.D266N  | c.796G>A  | Unverified | TCT | GAT | CTG | 1 | G | A |
| TCGA-20-1686 | PRG2_ENST | ENST00000311862 | p.R126Q  | c.377G>A  | Unverified | TGC | CGG | AGG | 2 | G | A |
| TCGA-09-1674 | PRKAB2    | ENST00000254101 | p.M193I  | c.579G>A  | Unverified | gaa | atg | tat | 3 | G | A |
| TCGA-13-0893 | PRKCA     | ENST00000413366 | p.R161Q  | c.482G>A  | Verified   | GGG | CGG | ATT | 2 | G | A |
| TCGA-04-1338 | PRKCG     | ENST00000263431 | p.D254N  | c.760G>A  | Verified   | AAC | GAC | TTC | 1 | G | A |
| TCGA-24-1604 | PRKCH     | NM_006255       | p.V390M  | c.1168G>A | Verified   | gac | gtg | att | 1 | G | A |
| TCGA-61-1907 | PRKRIR    | ENST00000260045 | p.G376R  | c.1126G>A | Unverified | ATG | GGA | GTA | 1 | G | A |
| TCGA-23-1116 | PRMT1     | ENST00000391849 | p.T291T  | c.873G>A  | Unverified | CAG | ACG | GTG | 3 | G | A |
| TCGA-23-2077 | PROM2     | ENST00000317668 | p.E661K  | c.1981G>A | Unverified | GAG | GAG | GCC | 1 | G | A |
| TCGA-29-1769 | PROZ      | ENST00000375547 | p.E51K   | c.151G>A  | Unverified | TTC | GAG | GGA | 1 | G | A |
| TCGA-13-0919 | PRPF4     | ENST00000374198 | p.V140I  | c.418G>A  | Verified   | GTT | GTC | GGT | 1 | G | A |
| TCGA-13-0920 | PRPH2     | ENST00000230381 | p.V209I  | c.625G>A  | Verified   | GGC | GTC | CCT | 1 | G | A |
| TCGA-09-2044 | PRRT2     | ENST00000358758 | p.E46E   | c.138G>A  | Unverified | CCA | GAG | GCC | 3 | G | A |
| TCGA-04-1356 | PRSS36    | ENST00000268281 | p.W357*  | c.1070G>A | Unverified | AGC | TGG | GTC | 2 | G | A |



|              |                       |                 |         |            |            |     |     |     |   |   |   |
|--------------|-----------------------|-----------------|---------|------------|------------|-----|-----|-----|---|---|---|
| TCGA-24-2280 | PRSS36                | ENST00000268281 | p.R314R | c.942G>A   | Unverified | CCC | AGG | GAG | 3 | G | A |
| TCGA-24-1431 | PRSS54                | ENST00000219301 | p.R14Q  | c.41G>A    | Verified   | ATG | CGA | GGG | 2 | G | A |
| TCGA-13-0904 | PRTFDC1               | ENST00000320152 | p.G125R | c.373G>A   | Verified   | ATC | GGA | GGC | 1 | G | A |
| TCGA-61-1725 | PSAP                  | ENST00000394936 | p.G480R | c.1438G>A  | Unverified | ATT | GGA | GCC | 1 | G | A |
| TCGA-25-2398 | PSD_ENST000000020673  | ENST00000020673 | p.A166T | c.496G>A   | Verified   | TCG | GCC | CTA | 1 | G | A |
| TCGA-29-1785 | PSD2                  | ENST00000274710 | p.A55A  | c.165G>A   | Unverified | CCA | GCG | GAC | 3 | G | A |
| TCGA-29-1785 | PSD2                  | ENST00000274710 | p.A55A  | c.165G>A   | Unverified | CCA | GCG | GAC | 3 | G | A |
| TCGA-13-0793 | PSD3                  | ENST00000286485 | p.G375S | c.1123G>A  | Verified   | ATC | GGC | TCT | 1 | G | A |
| TCGA-24-1469 | PSG3                  | ENST00000327495 | p.D161N | c.481G>A   | Verified   | GAG | GAC | ATG | 1 | G | A |
| TCGA-30-1857 | PSG3                  | ENST00000327495 | p.G17E  | c.50G>A    | Unverified | AAG | GGG | CTC | 2 | G | A |
| TCGA-61-1737 | PSG5                  | ENST00000342951 | p.K310K | c.930G>A   | Unverified | GGC | AAG | GAA | 3 | G | A |
| TCGA-24-0979 | PSMA2                 | ENST00000223321 | p.V87V  | c.261G>A   | Verified   | CTT | GTG | CAC | 3 | G | A |
| TCGA-29-1768 | PSMC1                 | ENST00000261303 | p.?     | c.58-1G>A  | Unverified | AAG | GAC | AAG | 1 | G | A |
| TCGA-29-1690 | PSMC5                 | ENST00000310144 | p.V186V | c.558G>A   | Unverified | GGA | GTG | CTG | 3 | G | A |
| TCGA-61-1900 | PSMD7                 | ENST00000219313 | p.E136K | c.406G>A   | Unverified | ACA | GAA | GCG | 1 | G | A |
| TCGA-30-1856 | PSME2                 | ENST00000216802 | p.V153I | c.457G>A   | Unverified | GCC | GTC | AAG | 1 | G | A |
| TCGA-25-1326 | PTCD1                 | ENST00000292478 | p.K580K | c.1740G>A  | Unverified | AAG | AAG | TCC | 3 | G | A |
| TCGA-13-0807 | PTCH1                 | ENST00000331920 | p.V474I | c.1420G>A  | Verified   | GGC | GTC | CTG | 1 | G | A |
| TCGA-13-0807 | PTCH1_ENST00000331920 | ENST00000331920 | p.V474I | c.1420G>A  | Verified   | GGC | GTC | CTG | 1 | G | A |
| TCGA-61-1914 | PTCHD2                | XM_052561.7     | p.D359N | c.1075G>A  | Unverified | gcc | gac | ttc | 1 | G | A |
| TCGA-24-1845 | PTCHD3                | ENST00000438700 | p.G437G | c.1311G>A  | Unverified | ATT | GGG | GTG | 3 | G | A |
| TCGA-04-1361 | PTGS2                 | ENST00000367468 | p.G283S | c.847G>A   | Verified   | CCT | GGT | CTG | 1 | G | A |
| TCGA-04-1361 | PTGS2                 | ENST00000367468 | p.G283S | c.847G>A   | Verified   | CCT | GGT | CTG | 1 | G | A |
| TCGA-29-1769 | PTGS2                 | ENST00000367468 | p.K559K | c.1677G>A  | Unverified | GTG | AAG | GGC | 3 | G | A |
| TCGA-29-1769 | PTGS2_ENST00000367468 | ENST00000367468 | p.K559K | c.1677G>A  | Unverified | GTG | AAG | GGC | 3 | G | A |
| TCGA-23-1809 | PTPN3                 | ENST00000394831 | p.D215N | c.643G>A   | Unverified | CTC | GAC | TTC | 1 | G | A |
| TCGA-61-1899 | PTPRD                 | ENST00000381196 | p.?     | c.541+6G>A | Unverified | TCA | GAA | TCT | 1 | G | A |
| TCGA-61-1899 | PTPRD_ENST00000346816 | ENST00000346816 | p.?     | c.541+6G>A | Unverified | TCA | GTT | TCT | 1 | G | A |
| TCGA-61-1899 | PTPRD_ENST00000355233 | ENST00000355233 | p.?     | c.541+6G>A | Unverified | TCA | GAA | TCT | 1 | G | A |
| TCGA-61-1899 | PTPRD_ENST00000381196 | ENST00000381196 | p.?     | c.541+6G>A | Unverified | TCA | GAA | TCT | 1 | G | A |
| TCGA-29-1696 | PTPRD_ENST00000381196 | ENST00000381196 | p.M764I | c.2292G>A  | Unverified | CCC | ATG | CTG | 3 | G | A |
| TCGA-29-1696 | PTPRD_ENST00000381196 | ENST00000381196 | p.M764I | c.2292G>A  | Unverified | CCC | ATG | CTG | 3 | G | A |
| TCGA-13-1496 | PTPRJ                 | ENST00000418331 | p.G338S | c.1012G>A  | Verified   | CCT | GGC | ACC | 1 | G | A |
| TCGA-29-2427 | PTPRN2                | NM_002847.2     | p.V558M | c.1672G>A  | Verified   | aaa | gtg | agc | 1 | G | A |

|              |            |                 |          |           |            |     |     |     |   |   |   |
|--------------|------------|-----------------|----------|-----------|------------|-----|-----|-----|---|---|---|
| TCGA-04-1649 | PTPRN2     | NM_002847.2     | p.P822P  | c.2466G>A | Unverified | gga | ccg | ctg | 3 | G | A |
| TCGA-29-1693 | PTPRO      | ENST00000281171 | p.S276S  | c.828G>A  | Unverified | ccc | tcg | ggc | 3 | G | A |
| TCGA-61-1907 | PTPRR      | NM_002849.2     | p.R414H  | c.1241G>A | Unverified | ccg | cgt | cat | 2 | G | A |
| TCGA-29-1764 | PTPRZ1     | ENST00000393386 | p.V805V  | c.2415G>A | Unverified | GAT | GTG | TCA | 3 | G | A |
| TCGA-04-1362 | PTPRZ1_ENS | ENST00000393386 | p.D2178N | c.6532G>A | Verified   | GAT | GAT | TAT | 1 | G | A |
| TCGA-29-1764 | PTPRZ1_ENS | ENST00000393386 | p.V805V  | c.2415G>A | Unverified | GAT | GTG | TCA | 3 | G | A |
| TCGA-61-1895 | Q6ZU04_HU  | ENST00000342355 | p.L322L  | c.966G>A  | Unverified | TGG | CTG | ATC | 3 | G | A |
| TCGA-61-1907 | Q8N164_HU  | ENST00000313544 | p.V103I  | c.307G>A  | Unverified | TCA | GTT | TTT | 1 | G | A |
| TCGA-24-0979 | Q8N8C9_HL  | ENST00000316673 | p.L371L  | c.1113G>A | Verified   | CAC | CTG | ATG | 3 | G | A |
| TCGA-04-1347 | Q96HZ0_HU  | ENST00000292140 | p.A467A  | c.1401G>A | Verified   | ATG | GCG | GAG | 3 | G | A |
| TCGA-13-1488 | Q9Y6V0-3   | ENST00000333891 | p.Q514Q  | c.1542G>A | Verified   | CTG | CAG | CCA | 3 | G | A |
| TCGA-29-1776 | QRICH2     | ENST00000262765 | p.P1196P | c.3588G>A | Unverified | GCC | CCG | CAC | 3 | G | A |
| TCGA-24-1563 | QSOX1      | ENST00000367602 | p.A559T  | c.1675G>A | Verified   | GTG | GCA | GCC | 1 | G | A |
| TCGA-29-2427 | RAB10      | ENST00000264710 | p.D125N  | c.373G>A  | Verified   | TGT | GAT | ATG | 1 | G | A |
| TCGA-29-1766 | RAB11FIP1  | ENST00000330843 | p.P1273P | c.3819G>A | Unverified | ATC | CCG | ACT | 3 | G | A |
| TCGA-25-2391 | RAB1B      | ENST00000311481 | p.A152T  | c.454G>A  | Unverified | agc | gcc | aag | 1 | G | A |
| TCGA-25-1313 | RAB36      | ENST00000263116 | p.W90*   | c.270G>A  | Verified   | aag | tgg | tac | 3 | G | A |
| TCGA-04-1343 | RAB3C      | ENST00000282878 | p.E115K  | c.343G>A  | Verified   | aat | gaa | gaa | 1 | G | A |
| TCGA-13-0761 | RAB3D      | ENST00000222120 | p.G198D  | c.593G>A  | Verified   | tca | ggc | agc | 2 | G | A |
| TCGA-13-0761 | RAB3D      | ENST00000222120 | p.G198D  | c.593G>A  | Verified   | tca | ggc | agc | 2 | G | A |
| TCGA-13-0883 | RAB3GAP2   | ENST00000358951 | p.R1032H | c.3095G>A | Unverified | GCA | CGT | TTT | 2 | G | A |
| TCGA-09-2051 | RAB40AL    | ENST00000218249 | p.K188K  | c.564G>A  | Unverified | AGC | AAG | GTA | 3 | G | A |
| TCGA-04-1338 | RABEP1     | ENST00000262477 | p.V830V  | c.2490G>A | Verified   | CAG | GTG | CAG | 3 | G | A |
| TCGA-61-1725 | RABGGTA    | ENST00000399409 | p.G118S  | c.352G>A  | Unverified | CTA | GGC | CGC | 1 | G | A |
| TCGA-61-1737 | RAD54L     | ENST00000442598 | p.R319Q  | c.956G>A  | Unverified | AGC | CGG | CGG | 2 | G | A |
| TCGA-61-2094 | RAET1L     | ENST00000367341 | p.G54S   | c.160G>A  | Unverified | CAA | GGC | CAG | 1 | G | A |
| TCGA-24-1470 | RALGAPA1   | ENST00000389698 | p.G1700R | c.5098G>A | Verified   | ACT | GGA | ATC | 1 | G | A |
| TCGA-13-1510 | RANBP10    | ENST00000317506 | p.G156S  | c.466G>A  | Unverified | act | ggc | cag | 1 | G | A |
| TCGA-24-2288 | RANBP3     | ENST00000340578 | p.G422D  | c.1265G>A | Unverified | aga | ggc | cgg | 2 | G | A |
| TCGA-23-1124 | RAP1GAP_E  | ENST00000374757 | p.V42V   | c.126G>A  | Verified   | CAT | GTG | TGG | 3 | G | A |
| TCGA-29-1783 | RAPGEF2    | ENST00000264431 | p.G890R  | c.2668G>A | Unverified | GAC | GGG | CTG | 1 | G | A |
| TCGA-61-2009 | RAPGEF5    | NM_012294.2     | p.R277Q  | c.830G>A  | Verified   | aag | cga | gtg | 2 | G | A |
| TCGA-04-1651 | RAPGEF5    | NM_012294.2     | p.Q405Q  | c.1215G>A | Unverified | aac | cag | ttt | 3 | G | A |
| TCGA-04-1651 | RAPGEF5    | NM_012294.2     | p.Q405Q  | c.1215G>A | Unverified | aac | cag | ttt | 3 | G | A |

|              |            |                 |          |           |            |     |     |     |   |   |   |
|--------------|------------|-----------------|----------|-----------|------------|-----|-----|-----|---|---|---|
| TCGA-61-2009 | RAPGEF5_EI | ENST00000344041 | p.R563Q  | c.1688G>A | Verified   | AAG | CGA | GTG | 2 | G | A |
| TCGA-04-1651 | RAPGEF5_EI | ENST00000344041 | p.Q691Q  | c.2073G>A | Unverified | AAC | CAG | TTT | 3 | G | A |
| TCGA-04-1651 | RAPGEF5_EI | ENST00000344041 | p.Q691Q  | c.2073G>A | Unverified | AAC | CAG | TTT | 3 | G | A |
| TCGA-25-1326 | RAPGEF6    | NM_016340.2     | p.R13K   | c.38G>A   | Unverified | aag | agg | acc | 2 | G | A |
| TCGA-20-0991 | RAPGEFL1   | ENST00000264644 | p.E395E  | c.1185G>A | Verified   | atc | gag | aag | 3 | G | A |
| TCGA-09-2051 | RARRES1    | ENST00000237696 | p.R122H  | c.365G>A  | Unverified | GGA | CGT | TTG | 2 | G | A |
| TCGA-24-1103 | RASA2      | ENST00000286364 | p.R75H   | c.224G>A  | Verified   | TAT | CGT | ACC | 2 | G | A |
| TCGA-23-1032 | RASAL1     | ENST00000261729 | p.D642N  | c.1924G>A | Unverified | CAG | GAC | GGC | 1 | G | A |
| TCGA-29-1693 | RASAL1     | ENST00000261729 | p.R197Q  | c.590G>A  | Unverified | CTG | CGG | GTG | 2 | G | A |
| TCGA-23-1022 | RASGEF1C   | ENST00000361132 | p.G293S  | c.877G>A  | Verified   | ATC | GGC | AAC | 1 | G | A |
| TCGA-13-1481 | RASSF2     | ENST00000379400 | p.R194H  | c.581G>A  | Verified   | gtc | cgc | atc | 2 | G | A |
| TCGA-13-0885 | RB1CC1     | ENST00000025008 | p.A683T  | c.2047G>A | Verified   | CCT | GCA | GTT | 1 | G | A |
| TCGA-13-0923 | RBBP8      | ENST00000327155 | p.S696N  | c.2087G>A | Unverified | gtt | agt | gaa | 2 | G | A |
| TCGA-24-0979 | RBM12      | ENST00000374104 | p.D355N  | c.1063G>A | Verified   | CAA | GAT | ACA | 1 | G | A |
| TCGA-13-1481 | RBM15      | ENST00000369784 | p.L976L  | c.2928G>A | Verified   | ACC | CTG | TTA | 3 | G | A |
| TCGA-61-1907 | RBM26      | ENST00000267229 | p.Q66Q   | c.198G>A  | Unverified | ACA | CAG | ATA | 3 | G | A |
| TCGA-61-1907 | RBM26_ENS  | ENST00000327303 | p.Q66Q   | c.198G>A  | Unverified | ACA | CAG | ATA | 3 | G | A |
| TCGA-13-0760 | RBM4       | ENST00000310092 | p.A359T  | c.1075G>A | Verified   | CGG | GCG | CGG | 1 | G | A |
| TCGA-13-0807 | RBM44      | ENST00000316997 | p.G221E  | c.662G>A  | Verified   | TTA | GGA | AAT | 2 | G | A |
| TCGA-24-1431 | RBPJL      | ENST00000343694 | p.A492T  | c.1474G>A | Unverified | ccc | gcc | acc | 1 | G | A |
| TCGA-29-1775 | RC3H1      | ENST00000258349 | p.Q407Q  | c.1221G>A | Unverified | CAG | CAG | CCT | 3 | G | A |
| TCGA-61-1733 | RCHY1      | ENST00000324439 | p.R54H   | c.161G>A  | Unverified | GAT | CGC | TTT | 2 | G | A |
| TCGA-61-1733 | RCHY1      | ENST00000324439 | p.R54H   | c.161G>A  | Unverified | GAT | CGC | TTT | 2 | G | A |
| TCGA-61-1915 | RCN2       | ENST00000394885 | p.G204E  | c.611G>A  | Unverified | GAT | GGA | TTT | 2 | G | A |
| TCGA-29-1775 | RCOR3      | ENST00000367005 | p.Q342Q  | c.1026G>A | Unverified | TTG | CAG | GAG | 3 | G | A |
| TCGA-13-0755 | RDH5       | ENST00000257895 | p.E216K  | c.646G>A  | Verified   | CTG | GAG | AGT | 1 | G | A |
| TCGA-04-1342 | REEP2      | ENST00000254901 | p.V10M   | c.28G>A   | Unverified | CTG | GTG | GTG | 1 | G | A |
| TCGA-25-2392 | RELN       | ENST00000343529 | p.A1276T | c.3826G>A | Verified   | TCA | GCA | ATG | 1 | G | A |
| TCGA-30-1857 | RELN       | ENST00000343529 | p.G106D  | c.317G>A  | Unverified | GGA | GGT | TCC | 2 | G | A |
| TCGA-23-1123 | REP15      | ENST00000310791 | p.V19I   | c.55G>A   | Verified   | CCC | GTC | GTC | 1 | G | A |
| TCGA-23-1123 | REP15      | ENST00000310791 | p.V19I   | c.55G>A   | Verified   | CCC | GTC | GTC | 1 | G | A |
| TCGA-61-1738 | REPIN1     | ENST00000397281 | p.R165Q  | c.494G>A  | Unverified | CTG | CGG | CGG | 2 | G | A |
| TCGA-61-1738 | REPIN1     | ENST00000397281 | p.R165Q  | c.494G>A  | Unverified | CTG | CGG | CGG | 2 | G | A |
| TCGA-61-1738 | REPIN1_ENS | ENST00000489432 | p.R222Q  | c.665G>A  | Unverified | CTG | CGG | CGG | 2 | G | A |

|              |            |                 |          |           |            |     |     |     |   |   |   |
|--------------|------------|-----------------|----------|-----------|------------|-----|-----|-----|---|---|---|
| TCGA-61-1738 | REPIN1_ENS | ENST00000489432 | p.R222Q  | c.665G>A  | Unverified | CTG | CGG | CGG | 2 | G | A |
| TCGA-24-2288 | RERE       | ENST00000400908 | p.R358Q  | c.1073G>A | Unverified | TCT | CGG | GAT | 2 | G | A |
| TCGA-04-1347 | REV1       | ENST00000258428 | p.T331T  | c.993G>A  | Verified   | TCT | ACG | TTT | 3 | G | A |
| TCGA-23-1110 | RFX3       | ENST00000358730 | p.M84I   | c.252G>A  | Verified   | CAG | ATG | TAC | 3 | G | A |
| TCGA-13-1498 | RFX5       | ENST00000368870 | p.D610N  | c.1828G>A | Verified   | AAA | GAC | CCA | 1 | G | A |
| TCGA-61-1910 | RGAG1      | ENST00000465301 | p.A1131A | c.3393G>A | Unverified | ACT | GCG | AAA | 3 | G | A |
| TCGA-13-0884 | RGAG4      | XM_291322.3     | p.R315H  | c.944G>A  | Verified   | att | cgc | aag | 2 | G | A |
| TCGA-13-0886 | RGL3       | XM_290867.2     | p.S376S  | c.1128G>A | Verified   | agc | tcg | gag | 3 | G | A |
| TCGA-13-0887 | RGL3_ENST  | ENST00000380456 | p.W151*  | c.452G>A  | Verified   | TCC | TGG | CTG | 2 | G | A |
| TCGA-04-1347 | RGL3_ENST  | ENST00000380456 | p.A131A  | c.393G>A  | Verified   | ACA | GCG | GTA | 3 | G | A |
| TCGA-13-0886 | RGL3_ENST  | ENST00000380456 | p.S612S  | c.1836G>A | Verified   | AGC | TCG | GAG | 3 | G | A |
| TCGA-09-1674 | RGPD2_ENS  | ENST00000398146 | p.V1700M | c.5098G>A | Unverified | AAC | GTG | GAA | 1 | G | A |
| TCGA-29-1711 | RGPD4      | ENST00000408999 | p.D694N  | c.2080G>A | Unverified | GAA | GAC | ATT | 1 | G | A |
| TCGA-29-1711 | RGPD4      | ENST00000408999 | p.D694N  | c.2080G>A | Unverified | GAA | GAC | ATT | 1 | G | A |
| TCGA-29-1698 | RGPD4      | ENST00000408999 | p.K734K  | c.2202G>A | Unverified | GTC | AAG | AAA | 3 | G | A |
| TCGA-13-0924 | RGS18      | ENST00000367460 | p.R62H   | c.185G>A  | Verified   | acc | cgc | tcc | 2 | G | A |
| TCGA-29-1768 | RGS2       | ENST00000235382 | p.K102K  | c.306G>A  | Unverified | tta | aag | tcg | 3 | G | A |
| TCGA-24-1844 | RGS4       | ENST00000367909 | p.E96K   | c.286G>A  | Unverified | tgt | gaa | gag | 1 | G | A |
| TCGA-24-1844 | RGS4_ENST  | ENST00000421743 | p.E193K  | c.577G>A  | Unverified | TGT | GAA | GAG | 1 | G | A |
| TCGA-23-1111 | RGS7       | ENST00000366565 | p.E255K  | c.763G>A  | Unverified | ACA | GAA | GAT | 1 | G | A |
| TCGA-23-1111 | RGS7_ENST  | ENST00000366565 | p.E255K  | c.763G>A  | Unverified | ACA | GAA | GAT | 1 | G | A |
| TCGA-09-2044 | RGS9       | ENST00000262406 | p.R569Q  | c.1706G>A | Verified   | AGC | CGG | CCC | 2 | G | A |
| TCGA-29-1693 | RHBDF2     | ENST00000313080 | p.L684L  | c.2052G>A | Unverified | GAC | CTG | GAG | 3 | G | A |
| TCGA-61-2012 | RHBDL3     | ENST00000269051 | p.M270I  | c.810G>A  | Verified   | GAC | ATG | ACC | 3 | G | A |
| TCGA-29-1695 | RHOBTB1    | ENST00000357917 | p.V580I  | c.1738G>A | Unverified | gcc | ggt | cag | 1 | G | A |
| TCGA-13-0890 | RIMS1      | ENST00000521978 | p.P1157P | c.3471G>A | Verified   | TCT | CCG | GAG | 3 | G | A |
| TCGA-29-1769 | RIN2       | NM_018993.2     | p.R523R  | c.1569G>A | Unverified | tcc | cgg | gac | 3 | G | A |
| TCGA-29-1769 | RIN2_ENST  | ENST00000255006 | p.R572R  | c.1716G>A | Unverified | TCC | CGG | GAC | 3 | G | A |
| TCGA-04-1338 | RIPK3      | ENST00000216274 | p.M211I  | c.633G>A  | Verified   | CTA | ATG | TGG | 3 | G | A |
| TCGA-23-1118 | RIPK4      | ENST00000332512 | p.L641L  | c.1923G>A | Verified   | CCC | CTG | CAC | 3 | G | A |
| TCGA-13-1481 | RIT2       | ENST00000326695 | p.D55N   | c.163G>A  | Verified   | gaa | gat | gct | 1 | G | A |
| TCGA-13-0924 | RNASE12    | ENST00000382999 | p.E112K  | c.334G>A  | Verified   | ATT | GAA | GGC | 1 | G | A |
| TCGA-23-1022 | RNF112     | ENST00000299604 | p.D285N  | c.853G>A  | Verified   | AAG | GAT | ACA | 1 | G | A |
| TCGA-13-0904 | RNF115     | ENST00000369291 | p.G151E  | c.452G>A  | Verified   | GCA | GGA | TTC | 2 | G | A |

|              |            |                 |          |           |            |     |     |     |   |   |   |
|--------------|------------|-----------------|----------|-----------|------------|-----|-----|-----|---|---|---|
| TCGA-61-1906 | RNF122     | ENST00000256257 | p.R71Q   | c.212G>A  | Unverified | gag | cga | tac | 2 | G | A |
| TCGA-61-1906 | RNF122     | ENST00000256257 | p.R71Q   | c.212G>A  | Unverified | gag | cga | tac | 2 | G | A |
| TCGA-13-1488 | RNF149     | ENST00000295317 | p.M162I  | c.486G>A  | Verified   | ATT | ATG | ATT | 3 | G | A |
| TCGA-61-1733 | RNF165     | ENST00000269439 | p.V252M  | c.754G>A  | Unverified | AAT | GTG | ACT | 1 | G | A |
| TCGA-61-1733 | RNF165     | ENST00000269439 | p.V252M  | c.754G>A  | Unverified | AAT | GTG | ACT | 1 | G | A |
| TCGA-24-2267 | RNF20      | ENST00000389120 | p.E215E  | c.645G>A  | Verified   | gtg | gag | gaa | 3 | G | A |
| TCGA-24-1604 | RNF213     | ENST00000336301 | p.S3092N | c.9275G>A | Verified   | TAC | AGC | GAT | 2 | G | A |
| TCGA-23-2078 | RNF216     | ENST00000389902 | p.D899N  | c.2695G>A | Verified   | tat | gac | ttc | 1 | G | A |
| TCGA-24-1563 | RNF26      | ENST00000311413 | p.K388K  | c.1164G>A | Verified   | agc | aag | aca | 3 | G | A |
| TCGA-04-1347 | RNPS1      | ENST00000397086 | p.E217K  | c.649G>A  | Verified   | GCC | GAG | AAG | 1 | G | A |
| TCGA-13-0885 | ROM1       | ENST00000278833 | p.R186H  | c.557G>A  | Verified   | AGC | CGT | TAC | 2 | G | A |
| TCGA-13-0903 | ROR1       | ENST00000371079 | p.G183S  | c.547G>A  | Verified   | ATT | GGC | AAC | 1 | G | A |
| TCGA-29-1784 | RP1        | ENST00000220676 | p.G44E   | c.131G>A  | Unverified | AGC | GGA | GAC | 2 | G | A |
| TCGA-24-0979 | RP1L1      | ENST00000382483 | p.G1809R | c.5425G>A | Verified   | TCT | GGG | CAT | 1 | G | A |
| TCGA-13-0884 | RPH3A      | ENST00000389385 | p.R452Q  | c.1355G>A | Verified   | CTG | CGG | AAT | 2 | G | A |
| TCGA-13-0760 | RPIA       | ENST00000283646 | p.G143D  | c.428G>A  | Verified   | TAT | GGC | TTG | 2 | G | A |
| TCGA-24-1563 | RPL10L     | ENST00000298283 | p.A68T   | c.202G>A  | Verified   | GCC | GCC | CGT | 1 | G | A |
| TCGA-13-0760 | RPL35      | ENST00000348462 | p.R94R   | c.282G>A  | Verified   | CGC | CGG | CTC | 3 | G | A |
| TCGA-24-1417 | RPP40      | ENST00000380051 | p.W167*  | c.501G>A  | Unverified | TCT | TGG | TCT | 3 | G | A |
| TCGA-29-1769 | RPS3       | ENST00000531188 | p.R40Q   | c.119G>A  | Unverified | GTG | CGA | GTT | 2 | G | A |
| TCGA-13-0920 | RPS3A      | ENST00000274065 | p.E175E  | c.525G>A  | Verified   | CGA | GAG | GTG | 3 | G | A |
| TCGA-29-1783 | RPS6KA2    | ENST00000265678 | p.A591A  | c.1773G>A | Unverified | GCG | GCG | TGT | 3 | G | A |
| TCGA-29-1783 | RPS6KA2_EM | ENST00000503859 | p.A599A  | c.1797G>A | Unverified | GCG | GCG | TGT | 3 | G | A |
| TCGA-24-1844 | RPS6KA5    | ENST00000261991 | p.S240N  | c.719G>A  | Unverified | TGG | AGT | TTG | 2 | G | A |
| TCGA-24-1844 | RPS6KA5_EM | ENST00000261991 | p.S240N  | c.719G>A  | Unverified | TGG | AGT | TTG | 2 | G | A |
| TCGA-61-1900 | RPS6KB1    | ENST00000225577 | p.E45E   | c.135G>A  | Unverified | ctg | gag | gag | 3 | G | A |
| TCGA-24-1423 | RPS6KC1    | ENST00000366960 | p.G410S  | c.1228G>A | Verified   | ggt | ggc | aaa | 1 | G | A |
| TCGA-04-1652 | RPS9       | ENST00000391752 | p.V149I  | c.445G>A  | Unverified | ATT | GTC | CGC | 1 | G | A |
| TCGA-04-1652 | RPS9       | ENST00000391752 | p.V149I  | c.445G>A  | Unverified | ATT | GTC | CGC | 1 | G | A |
| TCGA-04-1649 | RPTOR      | ENST00000306801 | p.V1273I | c.3817G>A | Unverified | TCC | GTC | AAT | 1 | G | A |
| TCGA-13-0916 | RRN3       | ENST00000198767 | p.E288K  | c.862G>A  | Verified   | GAT | GAA | GAT | 1 | G | A |
| TCGA-20-1683 | RRP12      | ENST00000370992 | p.V447M  | c.1339G>A | Unverified | TGC | GTG | GCT | 1 | G | A |
| TCGA-61-1907 | RRP1B      | ENST00000340648 | p.R323H  | c.968G>A  | Unverified | AAG | CGC | CTC | 2 | G | A |
| TCGA-29-1690 | RSPH10B    | ENST00000337579 | p.R92H   | c.275G>A  | Unverified | GTT | CGT | GGG | 2 | G | A |

|              |            |                 |          |            |            |     |     |     |   |   |   |
|--------------|------------|-----------------|----------|------------|------------|-----|-----|-----|---|---|---|
| TCGA-13-0714 | RSPH10B2   | ENST00000297186 | p.A679T  | c.2035G>A  | Unverified | AGC | GCG | GTC | 1 | G | A |
| TCGA-29-1690 | RSPH10B2   | ENST00000297186 | p.R92H   | c.275G>A   | Unverified | GTT | CGT | GGG | 2 | G | A |
| TCGA-24-2290 | RSPH3      | ENST00000252655 | p.E390K  | c.1168G>A  | Verified   | AAC | GAG | ACA | 1 | G | A |
| TCGA-24-2290 | RSPH3      | ENST00000252655 | p.E390K  | c.1168G>A  | Verified   | AAC | GAG | ACA | 1 | G | A |
| TCGA-24-1431 | RTN2       | ENST00000245923 | p.V377M  | c.1129G>A  | Verified   | ATC | GTG | TCC | 1 | G | A |
| TCGA-23-2078 | RTP1       | ENST00000312295 | p.S226S  | c.678G>A   | Verified   | AAG | TCG | CAG | 3 | G | A |
| TCGA-09-1674 | RUNDC1     | ENST00000361677 | p.M470I  | c.1410G>A  | Unverified | GCC | ATG | CAC | 3 | G | A |
| TCGA-24-0979 | RYR1       | ENST00000359596 | p.A3541T | c.10621G>A | Verified   | TAC | GCC | CTG | 1 | G | A |
| TCGA-13-0885 | RYR2       | ENST00000366574 | p.V613I  | c.1837G>A  | Verified   | GAT | GTC | TTG | 1 | G | A |
| TCGA-20-1686 | RYR3       | ENST00000389232 | p.R3485Q | c.10454G>A | Unverified | AAA | CGG | GCA | 2 | G | A |
| TCGA-61-2109 | RYR3       | ENST00000389232 | p.L397L  | c.1191G>A  | Unverified | ACA | CTG | CAG | 3 | G | A |
| TCGA-25-1326 | S1PR5      | ENST00000333430 | p.D374N  | c.1120G>A  | Unverified | CTG | GAC | ACC | 1 | G | A |
| TCGA-24-2280 | SAGE1      | ENST00000324447 | p.R451Q  | c.1352G>A  | Unverified | caa | cga | aaa | 2 | G | A |
| TCGA-13-0919 | SALL2      | ENST00000327430 | p.L961L  | c.2883G>A  | Verified   | CTC | CTG | GCA | 3 | G | A |
| TCGA-04-1649 | SALL3      | ENST00000537592 | p.R1285H | c.3854G>A  | Unverified | AGC | CGC | CCA | 2 | G | A |
| TCGA-09-2051 | SALL4      | ENST00000217086 | p.E771K  | c.2311G>A  | Unverified | CAG | GAG | TAT | 1 | G | A |
| TCGA-23-1111 | SAMD4A     | ENST00000357634 | p.P413P  | c.1239G>A  | Unverified | ACT | CCG | ATC | 3 | G | A |
| TCGA-24-1845 | SAMD9L     | ENST00000318238 | p.M892I  | c.2676G>A  | Unverified | ATC | ATG | AAA | 3 | G | A |
| TCGA-24-1435 | SAMD9L     | ENST00000318238 | p.L1310L | c.3930G>A  | Verified   | CAT | TTG | GAT | 3 | G | A |
| TCGA-23-1031 | SAMM50     | ENST00000350028 | p.E234K  | c.700G>A   | Unverified | CGA | GAA | CTG | 1 | G | A |
| TCGA-13-1481 | SAMSN1     | ENST00000400566 | p.G189E  | c.566G>A   | Verified   | AAA | GGA | GAC | 2 | G | A |
| TCGA-24-1604 | SAMSN1     | ENST00000400566 | p.G54E   | c.161G>A   | Verified   | AGT | GGA | GAA | 2 | G | A |
| TCGA-61-1915 | SAP130     | ENST00000259235 | p.G372S  | c.1114G>A  | Unverified | ACT | GGC | ACG | 1 | G | A |
| TCGA-61-1915 | SAP130_ENS | ENST00000357702 | p.G372S  | c.1114G>A  | Unverified | ACT | GGC | ACG | 1 | G | A |
| TCGA-24-1847 | SARS       | ENST00000234677 | p.R45Q   | c.134G>A   | Unverified | CGA | CGA | TGT | 2 | G | A |
| TCGA-20-1685 | SARS       | ENST00000234677 | p.V84V   | c.252G>A   | Unverified | AAT | GTG | CTG | 3 | G | A |
| TCGA-24-2035 | SARS       | ENST00000234677 | p.T399T  | c.1197G>A  | Unverified | TGC | ACG | GAT | 3 | G | A |
| TCGA-24-1849 | SATB1      | ENST00000338745 | p.E654K  | c.1960G>A  | Unverified | gtg | gaa | gcc | 1 | G | A |
| TCGA-29-1763 | SATB1      | ENST00000338745 | p.R410Q  | c.1229G>A  | Unverified | ctc | cga | aag | 2 | G | A |
| TCGA-24-1849 | SATB1      | ENST00000338745 | p.Q694Q  | c.2082G>A  | Unverified | ttt | cag | aac | 3 | G | A |
| TCGA-61-2109 | SBF2       | ENST00000256190 | p.E1586E | c.4758G>A  | Unverified | GAA | GAG | ACC | 3 | G | A |
| TCGA-23-1114 | SCAI       | ENST00000373549 | p.G115R  | c.343G>A   | Unverified | TTT | GGA | AGA | 1 | G | A |
| TCGA-24-1846 | SCAND3     | ENST00000452236 | p.V112M  | c.334G>A   | Unverified | TGG | GTG | CGG | 1 | G | A |
| TCGA-29-1783 | SCAP       | ENST00000265565 | p.G1218S | c.3652G>A  | Unverified | GGC | GGC | CAG | 1 | G | A |

|              |            |                     |          |           |            |     |     |     |   |   |   |
|--------------|------------|---------------------|----------|-----------|------------|-----|-----|-----|---|---|---|
| TCGA-13-0920 | SCD5       | ENST00000319540     | p.W97*   | c.291G>A  | Verified   | TTG | TGG | AGC | 3 | G | A |
| TCGA-13-0795 | SCGN       | ENST00000377961     | p.R135Q  | c.404G>A  | Verified   | CTC | CGA | GAC | 2 | G | A |
| TCGA-13-0760 | SCIN       | ENST00000297029     | p.A289T  | c.865G>A  | Verified   | GGG | GCT | GCC | 1 | G | A |
| TCGA-04-1655 | SCIN       | ENST00000297029     | p.W440*  | c.1319G>A | Unverified | ACG | TGG | CAA | 2 | G | A |
| TCGA-04-1655 | SCIN_ENST0 | ENST00000297029     | p.W440*  | c.1319G>A | Unverified | ACG | TGG | CAA | 2 | G | A |
| TCGA-04-1356 | SCML1      | ENST00000380045     | p.R25H   | c.74G>A   | Verified   | agg | cgt | gag | 2 | G | A |
| TCGA-29-1703 | SCN11A     | ENST00000302328     | p.T1410T | c.4230G>A | Unverified | TTT | ACG | TTA | 3 | G | A |
| TCGA-25-2400 | SCN1B      | ENST00000262631     | p.S137N  | c.410G>A  | Verified   | ACC | AGC | GTC | 2 | G | A |
| TCGA-24-1417 | SCN2A      | ENST00000375427     | p.Q452Q  | c.1356G>A | Verified   | GAA | CAG | TTG | 3 | G | A |
| TCGA-13-1498 | SCN3B      | ENST00000299333     | p.E188K  | c.562G>A  | Verified   | GCC | GAA | GAG | 1 | G | A |
| TCGA-13-0714 | SCN4A      | ENST00000435607     | p.E764K  | c.2290G>A | Unverified | ATC | GAG | ACC | 1 | G | A |
| TCGA-29-1766 | SCN5A      | ENST00000333535     | p.R53Q   | c.158G>A  | Unverified | CCC | CGG | CCC | 2 | G | A |
| TCGA-29-1766 | SCN5A_ENS' | ENST00000333535_v68 | p.R53Q   | c.158G>A  | Unverified | CCC | CGG | CCC | 2 | G | A |
| TCGA-29-1766 | SCN5A_ENS' | ENST00000413689     | p.R53Q   | c.158G>A  | Unverified | CCC | CGG | CCC | 2 | G | A |
| TCGA-04-1542 | SCN8A      | ENST00000354534     | p.V764I  | c.2290G>A | Verified   | ATC | GTC | CTG | 1 | G | A |
| TCGA-61-1738 | SCN8A      | ENST00000354534     | p.G242S  | c.724G>A  | Unverified | GTG | GGT | GCC | 1 | G | A |
| TCGA-61-1738 | SCN8A      | ENST00000354534     | p.G242S  | c.724G>A  | Unverified | GTG | GGT | GCC | 1 | G | A |
| TCGA-23-1022 | SCN8A      | ENST00000354534     | p.R606Q  | c.1817G>A | Verified   | ATC | CGG | GCC | 2 | G | A |
| TCGA-23-1122 | SCN8A      | ENST00000354534     | p.L1845L | c.5535G>A | Verified   | TGC | TTG | GAC | 3 | G | A |
| TCGA-61-1738 | SCN8A_ENS' | ENST00000354534     | p.G242S  | c.724G>A  | Unverified | GTG | GGT | GCC | 1 | G | A |
| TCGA-61-1738 | SCN8A_ENS' | ENST00000354534     | p.G242S  | c.724G>A  | Unverified | GTG | GGT | GCC | 1 | G | A |
| TCGA-24-1463 | SCNN1B     | ENST00000343070     | p.V434M  | c.1300G>A | Verified   | AGC | GTG | GCG | 1 | G | A |
| TCGA-04-1530 | SCUBE1     | ENST00000360835     | p.R884H  | c.2651G>A | Unverified | TCC | CGC | TCC | 2 | G | A |
| TCGA-23-1022 | SCYL2      | ENST00000360820     | p.G355R  | c.1063G>A | Verified   | AAA | GGA | CTG | 1 | G | A |
| TCGA-61-2012 | SCYL2      | ENST00000360820     | p.R505H  | c.1514G>A | Verified   | GTT | CGT | GTA | 2 | G | A |
| TCGA-23-1116 | SDC2       | ENST00000302190     | p.E125K  | c.373G>A  | Verified   | GCC | GAA | GAG | 1 | G | A |
| TCGA-13-0887 | SDK2       | ENST00000316893     | p.A814T  | c.2440G>A | Verified   | AAC | GCC | CCC | 1 | G | A |
| TCGA-29-1691 | SDK2       | ENST00000316893     | p.P1406P | c.4218G>A | Unverified | AGG | CCG | ATG | 3 | G | A |
| TCGA-04-1362 | SEC11A     | ENST00000268220     | p.R178H  | c.533G>A  | Verified   | CAT | CGT | GAG | 2 | G | A |
| TCGA-61-2009 | SEC13      | ENST00000350697     | p.R43H   | c.128G>A  | Verified   | GTG | CGC | AAT | 2 | G | A |
| TCGA-23-1124 | SEC14L1    | ENST00000436233     | p.V530I  | c.1588G>A | Verified   | AGC | GTC | TTC | 1 | G | A |
| TCGA-61-1998 | SEC23IP    | ENST00000369075     | p.G770R  | c.2308G>A | Verified   | GCC | GGA | CAG | 1 | G | A |
| TCGA-61-2008 | SEC24B     | ENST00000399100     | p.L476L  | c.1428G>A | Verified   | GGA | TTG | AGT | 3 | G | A |
| TCGA-04-1347 | SEL1L      | ENST00000336735     | p.G304S  | c.910G>A  | Verified   | gct | ggc | atc | 1 | G | A |

|              |            |                 |          |             |            |     |     |     |   |   |   |
|--------------|------------|-----------------|----------|-------------|------------|-----|-----|-----|---|---|---|
| TCGA-20-1687 | SEMA5A     | ENST00000382496 | p.A103T  | c.307G>A    | Unverified | AAG | GCC | TGT | 1 | G | A |
| TCGA-13-0904 | SEMA5A     | ENST00000382496 | p.Q166Q  | c.498G>A    | Verified   | CCC | CAG | CAC | 3 | G | A |
| TCGA-13-0900 | SEMA5A     | ENST00000382496 | p.P740P  | c.2220G>A   | Unverified | GAT | CCG | AAT | 3 | G | A |
| TCGA-23-1117 | SEMA6A     | ENST00000343348 | p.A175T  | c.523G>A    | Verified   | GTT | GCA | CTG | 1 | G | A |
| TCGA-23-1117 | SEMA6A     | ENST00000343348 | p.A175T  | c.523G>A    | Verified   | GTT | GCA | CTG | 1 | G | A |
| TCGA-20-1683 | SENP2      | ENST00000296257 | p.R199H  | c.596G>A    | Unverified | AGG | CGT | CCC | 2 | G | A |
| TCGA-20-1683 | SENP2_ENST | ENST00000296257 | p.R199H  | c.596G>A    | Unverified | AGG | CGT | CCC | 2 | G | A |
| TCGA-13-0885 | SENP3      | NM_015670.3     | p.E420K  | c.1258G>A   | Verified   | cct | gaa | aag | 1 | G | A |
| TCGA-61-1914 | SENP7      | NM_020654.2     | p.R95K   | c.284G>A    | Unverified | gaa | agg | ata | 2 | G | A |
| TCGA-61-1914 | SENP7_ENST | ENST00000394095 | p.R95K   | c.284G>A    | Unverified | GAA | AGG | CAA | 2 | G | A |
| TCGA-29-1699 | SERBP1     | ENST00000370995 | p.G43G   | c.129G>A    | Unverified | GGC | GGG | GGC | 3 | G | A |
| TCGA-04-1356 | SERPINB1   | ENST00000380739 | p.E268K  | c.802G>A    | Verified   | att | gaa | gtt | 1 | G | A |
| TCGA-13-0761 | SERPINB1   | ENST00000380739 | p.V229I  | c.685G>A    | Unverified | atg | gtc | atc | 1 | G | A |
| TCGA-13-0761 | SERPINB1   | ENST00000380739 | p.V229I  | c.685G>A    | Unverified | atg | gtc | atc | 1 | G | A |
| TCGA-61-2113 | SERPINB3   | ENST00000283752 | p.T112T  | c.336G>A    | Verified   | aaa | acg | tat | 3 | G | A |
| TCGA-61-2095 | SERPINB4   | ENST00000341074 | p.A104T  | c.310G>A    | Unverified | atc | gcc | aac | 1 | G | A |
| TCGA-61-1907 | SERPINB5   | ENST00000382771 | p.D76N   | c.226G>A    | Unverified | TCG | GAT | GTA | 1 | G | A |
| TCGA-29-1777 | SERPINE2   | ENST00000258405 | p.G330E  | c.989G>A    | Unverified | aca | ggg | tca | 2 | G | A |
| TCGA-29-1777 | SERPINE2_E | ENST00000447280 | p.R341K  | c.1022G>A   | Unverified | ACA | AGG | TCA | 2 | G | A |
| TCGA-25-1318 | SERTAD4    | ENST00000367012 | p.R63K   | c.188G>A    | Verified   | TAC | AGG | GGA | 2 | G | A |
| TCGA-25-1318 | SERTAD4    | ENST00000367012 | p.R63K   | c.188G>A    | Verified   | TAC | AGG | GGA | 2 | G | A |
| TCGA-24-1474 | SESTD1     | ENST00000428443 | p.E240K  | c.718G>A    | Verified   | GAT | GAA | CTT | 1 | G | A |
| TCGA-04-1530 | SETD4      | ENST00000399215 | p.R90Q   | c.269G>A    | Verified   | ATT | CGA | AGC | 2 | G | A |
| TCGA-13-0791 | SETD5      | ENST00000302463 | p.Q960Q  | c.2880G>A   | Unverified | CCC | CAG | AAC | 3 | G | A |
| TCGA-04-1361 | SETD5_ENST | ENST00000402198 | p.S38N   | c.113G>A    | Verified   | AAG | AGC | GTG | 2 | G | A |
| TCGA-04-1361 | SETD5_ENST | ENST00000402198 | p.S38N   | c.113G>A    | Verified   | AAG | AGC | GTG | 2 | G | A |
| TCGA-13-0791 | SETD5_ENST | ENST00000402198 | p.Q1058Q | c.3174G>A   | Unverified | CCC | CAG | AAC | 3 | G | A |
| TCGA-13-0795 | SETD6      | ENST00000310682 | p.G328E  | c.983G>A    | Verified   | GAG | GGA | GCC | 2 | G | A |
| TCGA-04-1343 | SEZ6L      | ENST00000248933 | p.?      | c.2212+1G>A | Verified   | ATA | GAG | GTA | 1 | G | A |
| TCGA-29-1770 | SEZ6L      | ENST00000248933 | p.R108H  | c.323G>A    | Unverified | GCC | CGC | CCC | 2 | G | A |
| TCGA-29-1690 | SEZ6L2     | ENST00000308713 | p.R386H  | c.1157G>A   | Unverified | GGG | CGC | CGG | 2 | G | A |
| TCGA-29-1690 | SEZ6L2_ENS | ENST00000350527 | p.R316H  | c.947G>A    | Unverified | GGG | CGC | CGG | 2 | G | A |
| TCGA-29-1690 | SFXN2      | ENST00000369893 | p.E40E   | c.120G>A    | Unverified | TCT | GAG | CGG | 3 | G | A |
| TCGA-29-1768 | SG269_HUM  | ENST00000312493 | p.K1299K | c.3897G>A   | Unverified | TTG | AAG | AAA | 3 | G | A |



|              |          |                 |          |             |            |     |     |     |   |   |   |
|--------------|----------|-----------------|----------|-------------|------------|-----|-----|-----|---|---|---|
| TCGA-29-1785 | SGCD     | ENST00000337851 | p.R11Q   | c.32G>A     | Unverified | CAC | CGG | AGC | 2 | G | A |
| TCGA-29-1785 | SGCD     | ENST00000337851 | p.R11Q   | c.32G>A     | Unverified | CAC | CGG | AGC | 2 | G | A |
| TCGA-29-1695 | SGEF     | ENST00000356448 | p.E229K  | c.685G>A    | Unverified | CTC | GAG | AAT | 1 | G | A |
| TCGA-25-2401 | SGIP1    | ENST00000371037 | p.K755K  | c.2265G>A   | Unverified | TGG | AAG | ATT | 3 | G | A |
| TCGA-29-1768 | SgK269   | ENST00000312493 | p.K1299K | c.3897G>A   | Unverified | TTG | AAG | AAA | 3 | G | A |
| TCGA-61-2095 | SGPP2    | ENST00000321276 | p.V81M   | c.241G>A    | Unverified | GTC | GTG | AAG | 1 | G | A |
| TCGA-13-0807 | SGSM3    | ENST00000248929 | p.E304K  | c.910G>A    | Verified   | TAC | GAG | GGC | 1 | G | A |
| TCGA-30-1855 | SH2D6    | ENST00000340326 | p.S67S   | c.201G>A    | Unverified | tac | tcg | ggg | 3 | G | A |
| TCGA-13-1497 | SH3BP4   | ENST00000344528 | p.V466V  | c.1398G>A   | Verified   | ACC | GTG | TGG | 3 | G | A |
| TCGA-24-0975 | SH3BP4   | ENST00000344528 | p.Q535Q  | c.1605G>A   | Unverified | CCC | CAG | GAT | 3 | G | A |
| TCGA-29-1702 | SH3BP4   | ENST00000344528 | p.E862E  | c.2586G>A   | Unverified | GCT | GAG | AAG | 3 | G | A |
| TCGA-24-2280 | SH3GL3   | ENST00000324537 | p.V351M  | c.1051G>A   | Unverified | ATC | GTG | CCT | 1 | G | A |
| TCGA-09-1674 | SH3PXD2A | ENST00000355946 | p.A822T  | c.2464G>A   | Unverified | agc | gcc | tac | 1 | G | A |
| TCGA-29-1702 | SH3RF3   | ENST00000309415 | p.C707Y  | c.2120G>A   | Unverified | GGA | TGC | AAA | 2 | G | A |
| TCGA-23-1120 | SH3TC2   | ENST00000515425 | p.E1232K | c.3694G>A   | Verified   | ACT | GAG | TAC | 1 | G | A |
| TCGA-13-0761 | SIAH2    | ENST00000312960 | p.G286S  | c.856G>A    | Verified   | gac | ggt | gtg | 1 | G | A |
| TCGA-13-0761 | SIAH2    | ENST00000312960 | p.G286S  | c.856G>A    | Verified   | gac | ggt | gtg | 1 | G | A |
| TCGA-04-1638 | SIGLEC14 | ENST00000360844 | p.T113T  | c.339G>A    | Unverified | GAC | ACG | GGA | 3 | G | A |
| TCGA-23-1117 | SIPA1L3  | ENST00000222345 | p.G869G  | c.2607G>A   | Verified   | GCA | GGG | GCC | 3 | G | A |
| TCGA-23-1117 | SIPA1L3  | ENST00000222345 | p.G869G  | c.2607G>A   | Verified   | GCA | GGG | GCC | 3 | G | A |
| TCGA-13-1512 | SIRPA    | ENST00000356025 | p.V302I  | c.904G>A    | Verified   | acc | gtt | aca | 1 | G | A |
| TCGA-04-1530 | SIRPD    | ENST00000381623 | p.R72Q   | c.215G>A    | Unverified | AAC | CGG | AAA | 2 | G | A |
| TCGA-23-1029 | SIRT3    | ENST00000382743 | p.E390K  | c.1168G>A   | Unverified | cgg | gaa | act | 1 | G | A |
| TCGA-24-1417 | SKA1     | ENST00000285116 | p.R191K  | c.572G>A    | Unverified | ACC | AGA | AAT | 2 | G | A |
| TCGA-13-1498 | SLC10A2  | ENST00000245312 | p.W118*  | c.353G>A    | Verified   | TAT | TGG | GTC | 2 | G | A |
| TCGA-13-0760 | SLC10A3  | ENST00000263512 | p.D280N  | c.838G>A    | Verified   | ggg | gac | gtc | 1 | G | A |
| TCGA-25-2393 | SLC11A1  | ENST00000233202 | p.D429N  | c.1285G>A   | Verified   | AAT | GAT | CTG | 1 | G | A |
| TCGA-24-1846 | SLC12A3  | ENST00000438926 | p.C645Y  | c.1934G>A   | Unverified | CAG | TGC | CTG | 2 | G | A |
| TCGA-23-1116 | SLC12A4  | ENST00000316341 | p.R492R  | c.1476G>A   | Unverified | AGC | AGG | AAC | 3 | G | A |
| TCGA-29-1761 | SLC14A2  | ENST00000255226 | p.A730T  | c.2188G>A   | Unverified | TCC | GCC | ATG | 1 | G | A |
| TCGA-23-1118 | SLC14A2  | ENST00000255226 | p.P885P  | c.2655G>A   | Verified   | CTC | CCG | CTC | 3 | G | A |
| TCGA-13-0916 | SLC16A2  | ENST00000276033 | p.E582K  | c.1744G>A   | Verified   | aaa | gag | cag | 1 | G | A |
| TCGA-24-1435 | SLC16A4  | ENST00000369779 | p.L157L  | c.471G>A    | Verified   | GGA | CTG | ACT | 3 | G | A |
| TCGA-04-1530 | SLC16A9  | ENST00000395347 | p.?      | c.1351+1G>A | Unverified | GTT | GGT | TGG | 1 | G | A |

|              |            |                 |         |           |            |     |     |     |   |   |   |
|--------------|------------|-----------------|---------|-----------|------------|-----|-----|-----|---|---|---|
| TCGA-61-1907 | SLC20A2    | ENST00000342228 | p.G560G | c.1680G>A | Unverified | ATG | GGG | AAG | 3 | G | A |
| TCGA-61-1907 | SLC25A20   | ENST00000319017 | p.R37Q  | c.110G>A  | Unverified | GTC | CGA | CTG | 2 | G | A |
| TCGA-20-1683 | SLC25A23   | ENST00000301454 | p.R139H | c.416G>A  | Unverified | TGG | CGC | GAC | 2 | G | A |
| TCGA-29-1777 | SLC25A39   | ENST00000225308 | p.G72S  | c.214G>A  | Unverified | AAT | GGT | GTC | 1 | G | A |
| TCGA-24-1104 | SLC25A4    | ENST00000281456 | p.R188K | c.563G>A  | Verified   | TAT | AGA | GCT | 2 | G | A |
| TCGA-29-1761 | SLC25A47   | ENST00000361529 | p.R267Q | c.800G>A  | Unverified | GTT | CGA | GAG | 2 | G | A |
| TCGA-23-1118 | SLC25A5    | ENST00000317881 | p.G158S | c.472G>A  | Verified   | CTC | GGT | GAC | 1 | G | A |
| TCGA-61-1904 | SLC26A3    | ENST00000340010 | p.V340I | c.1018G>A | Unverified | ACC | GTA | GGA | 1 | G | A |
| TCGA-13-1509 | SLC26A8    | ENST00000355574 | p.G964S | c.2890G>A | Verified   | GAG | GGC | AAC | 1 | G | A |
| TCGA-04-1362 | SLC28A2    | ENST00000347644 | p.S64N  | c.191G>A  | Verified   | TTC | AGC | AAA | 2 | G | A |
| TCGA-13-0795 | SLC2A2     | ENST00000314251 | p.V197I | c.589G>A  | Verified   | ATC | GTC | ACG | 1 | G | A |
| TCGA-04-1530 | SLC2A3     | ENST00000075120 | p.S363N | c.1088G>A | Verified   | ATG | AGC | TTT | 2 | G | A |
| TCGA-23-1022 | SLC2A5     | ENST00000377424 | p.V358M | c.1072G>A | Verified   | TGC | GTG | CTC | 1 | G | A |
| TCGA-13-0714 | SLC34A1    | ENST00000324417 | p.A263T | c.787G>A  | Verified   | GAT | GCT | CCT | 1 | G | A |
| TCGA-13-0920 | SLC35B2    | ENST00000393812 | p.L11L  | c.33G>A   | Verified   | GTG | CTG | GCT | 3 | G | A |
| TCGA-13-1488 | SLC35F3    | ENST00000366618 | p.V139M | c.415G>A  | Verified   | GGC | GTG | GCG | 1 | G | A |
| TCGA-61-1740 | SLC35F3    | ENST00000366618 | p.A106A | c.318G>A  | Unverified | CCG | GCG | GAG | 3 | G | A |
| TCGA-13-1509 | SLC37A3    | ENST00000326232 | p.V23M  | c.67G>A   | Verified   | GTA | GTG | TTC | 1 | G | A |
| TCGA-13-0883 | SLC38A1    | ENST00000398637 | p.S164N | c.491G>A  | Verified   | CTG | AGC | TAC | 2 | G | A |
| TCGA-61-2009 | SLC38A4    | ENST00000266579 | p.G73R  | c.217G>A  | Verified   | CCC | GGA | ACC | 1 | G | A |
| TCGA-29-1777 | SLC38A8    | ENST00000299709 | p.W47*  | c.141G>A  | Unverified | CCC | TGG | GCC | 3 | G | A |
| TCGA-30-1714 | SLC43A3    | ENST00000395123 | p.G77R  | c.229G>A  | Unverified | CTG | GGG | TCC | 1 | G | A |
| TCGA-23-2078 | SLC45A1    | ENST00000289877 | p.G349S | c.1045G>A | Unverified | TAC | GGC | AGC | 1 | G | A |
| TCGA-61-2012 | SLC4A3     | ENST00000273063 | p.R370H | c.1109G>A | Verified   | GCC | CGC | TGG | 2 | G | A |
| TCGA-13-0919 | SLC4A4     | ENST00000340595 | p.W781* | c.2343G>A | Verified   | TTT | TGG | GTG | 3 | G | A |
| TCGA-61-1907 | SLC4A8     | ENST00000319957 | p.W652* | c.1956G>A | Unverified | TAC | TGG | AAG | 3 | G | A |
| TCGA-61-1907 | SLC4A8_ENS | ENST00000394856 | p.W599* | c.1797G>A | Unverified | TAC | TGG | AAG | 3 | G | A |
| TCGA-61-1907 | SLC4A8_ENS | ENST00000453097 | p.W652* | c.1956G>A | Unverified | TAC | TGG | AAG | 3 | G | A |
| TCGA-23-1021 | SLC50A1    | ENST00000368404 | p.W175* | c.524G>A  | Verified   | TCC | TGG | TGC | 2 | G | A |
| TCGA-25-1318 | SLC5A10    | ENST00000395647 | p.G363S | c.1087G>A | Unverified | GTC | GGC | TGC | 1 | G | A |
| TCGA-25-1318 | SLC5A10    | ENST00000395647 | p.G363S | c.1087G>A | Unverified | GTC | GGC | TGC | 1 | G | A |
| TCGA-13-1497 | SLC5A12    | ENST00000396005 | p.R530K | c.1589G>A | Unverified | CAA | AGA | GGT | 2 | G | A |
| TCGA-20-0991 | SLC5A2     | ENST00000330498 | p.V346M | c.1036G>A | Verified   | TGC | GTG | GTG | 1 | G | A |
| TCGA-29-1691 | SLC5A6     | ENST00000310574 | p.S15S  | c.45G>A   | Unverified | ACC | TCG | GGC | 3 | G | A |

|              |            |                 |          |           |            |     |     |     |   |   |   |
|--------------|------------|-----------------|----------|-----------|------------|-----|-----|-----|---|---|---|
| TCGA-25-1326 | SLC5A7     | ENST00000264047 | p.V378I  | c.1132G>A | Verified   | ATC | GTT | TGG | 1 | G | A |
| TCGA-04-1338 | SLC6A15    | ENST00000266682 | p.A30T   | c.88G>A   | Verified   | GCA | GCT | GAT | 1 | G | A |
| TCGA-29-1764 | SLC6A3     | ENST00000270349 | p.A161T  | c.481G>A  | Unverified | ATC | GCC | TGG | 1 | G | A |
| TCGA-09-1665 | SLC6A3     | ENST00000270349 | p.V604V  | c.1812G>A | Verified   | CTG | GTG | GAC | 3 | G | A |
| TCGA-61-1915 | SLC6A6     | ENST00000360861 | p.A270A  | c.810G>A  | Unverified | GGC | GCG | GGC | 3 | G | A |
| TCGA-24-1845 | SLC6A9     | ENST00000372310 | p.T246T  | c.738G>A  | Unverified | TTC | ACG | GCC | 3 | G | A |
| TCGA-24-1845 | SLC6A9_ENS | ENST00000360584 | p.T319T  | c.957G>A  | Unverified | TTC | ACG | GCC | 3 | G | A |
| TCGA-61-2095 | SLC7A10    | ENST00000253188 | p.C398Y  | c.1193G>A | Unverified | CTC | TGC | TAC | 2 | G | A |
| TCGA-24-2262 | SLC7A8     | ENST00000316902 | p.E228K  | c.682G>A  | Verified   | CAG | GAA | CCT | 1 | G | A |
| TCGA-29-1699 | SLC7A8     | ENST00000316902 | p.R339Q  | c.1016G>A | Unverified | TCT | CGG | CTG | 2 | G | A |
| TCGA-61-1906 | SLC8A1     | ENST00000403092 | p.V156M  | c.466G>A  | Unverified | GAA | GTG | TGT | 1 | G | A |
| TCGA-61-1906 | SLC8A1     | ENST00000403092 | p.V156M  | c.466G>A  | Unverified | GAA | GTG | TGT | 1 | G | A |
| TCGA-61-2012 | SLC8A2     | ENST00000236877 | p.T730T  | c.2190G>A | Verified   | CTG | ACG | GTG | 3 | G | A |
| TCGA-24-1474 | SLC9A10    | ENST00000305815 | p.A70T   | c.208G>A  | Verified   | AAC | GCC | ATA | 1 | G | A |
| TCGA-61-1998 | SLC9A10    | ENST00000305815 | p.A1004T | c.3010G>A | Verified   | CTC | GCT | ATT | 1 | G | A |
| TCGA-04-1530 | SLC9A5     | ENST00000299798 | p.A183A  | c.549G>A  | Unverified | TCG | GCG | GTG | 3 | G | A |
| TCGA-04-1542 | SLCO1C1    | ENST00000266509 | p.C480Y  | c.1439G>A | Verified   | AGA | TGC | AAA | 2 | G | A |
| TCGA-29-1691 | SLCO1C1    | ENST00000266509 | p.C246Y  | c.737G>A  | Unverified | TTA | TGT | GCC | 2 | G | A |
| TCGA-29-1691 | SLCO1C1_EM | ENST00000381552 | p.C246Y  | c.737G>A  | Unverified | TTA | TGT | GCC | 2 | G | A |
| TCGA-04-1652 | SLCO3A1    | ENST00000318445 | p.M297I  | c.891G>A  | Unverified | GCC | ATG | GAA | 3 | G | A |
| TCGA-04-1652 | SLCO3A1    | ENST00000318445 | p.M297I  | c.891G>A  | Unverified | GCC | ATG | GAA | 3 | G | A |
| TCGA-13-0923 | SLCO6A1    | ENST00000379807 | p.G484G  | c.1452G>A | Verified   | GCT | GGG | ATC | 3 | G | A |
| TCGA-13-0807 | SLFN12L    | ENST00000449046 | p.T181T  | c.543G>A  | Verified   | GTA | ACG | TCT | 3 | G | A |
| TCGA-13-0760 | SLITRK2    | ENST00000447897 | p.S135N  | c.404G>A  | Verified   | gag | agc | ctg | 2 | G | A |
| TCGA-24-1843 | SLITRK4    | ENST00000381779 | p.K381K  | c.1143G>A | Unverified | aag | aag | ctg | 3 | G | A |
| TCGA-30-1891 | SMAP2      | ENST00000372718 | p.V161V  | c.483G>A  | Unverified | AAG | GTG | AAA | 3 | G | A |
| TCGA-36-1577 | SMARCA1    | NM_003069.2     | p.R525H  | c.1574G>A | Verified   | tgg | cgt | ggt | 2 | G | A |
| TCGA-20-1685 | SMARCA2    | ENST00000349721 | p.R261K  | c.782G>A  | Unverified | AAC | AGA | CCA | 2 | G | A |
| TCGA-29-1781 | SMARCA2    | ENST00000349721 | p.Q676Q  | c.2028G>A | Unverified | AAG | CAG | ATC | 3 | G | A |
| TCGA-20-1685 | SMARCA2_E  | ENST00000349721 | p.R261K  | c.782G>A  | Unverified | AAC | AGA | CCA | 2 | G | A |
| TCGA-29-1781 | SMARCA2_E  | ENST00000349721 | p.Q676Q  | c.2028G>A | Unverified | AAG | CAG | ATC | 3 | G | A |
| TCGA-13-0924 | SMARCAD1   | ENST00000354268 | p.S173N  | c.518G>A  | Verified   | AGA | AGT | GAC | 2 | G | A |
| TCGA-25-2393 | SMARCAL1   | ENST00000357276 | p.T742T  | c.2226G>A | Verified   | att | acg | caa | 3 | G | A |
| TCGA-04-1337 | SMARCAL1   | ENST00000357276 | p.T592T  | c.1776G>A | Verified   | tac | acg | cag | 3 | G | A |

|              |           |                     |          |           |            |     |     |     |   |   |   |
|--------------|-----------|---------------------|----------|-----------|------------|-----|-----|-----|---|---|---|
| TCGA-23-1021 | SMARCD1   | NM_003076.3         | p.A451T  | c.1351G>A | Verified   | gag | gct | gtg | 1 | G | A |
| TCGA-24-1464 | SMC1A     | ENST00000322213     | p.R895H  | c.2684G>A | Verified   | att | cgt | aag | 2 | G | A |
| TCGA-24-1563 | SMC1A     | ENST00000322213     | p.R626H  | c.1877G>A | Verified   | gcc | cgc | cgc | 2 | G | A |
| TCGA-04-1362 | SMC2      | ENST00000286398     | p.Q795Q  | c.2385G>A | Verified   | gct | cag | aaa | 3 | G | A |
| TCGA-25-2391 | SMC2      | ENST00000286398     | p.R58R   | c.174G>A  | Unverified | gtt | cgg | gct | 3 | G | A |
| TCGA-23-1032 | SMC4      | NM_005496.2         | p.D150N  | c.448G>A  | Verified   | tct | gat | gaa | 1 | G | A |
| TCGA-29-1696 | SMCHD1    | ENST00000261598     | p.G358D  | c.1073G>A | Unverified | CCT | GGC | TTA | 2 | G | A |
| TCGA-29-1696 | SMCHD1    | ENST00000261598     | p.G358D  | c.1073G>A | Unverified | CCT | GGC | TTA | 2 | G | A |
| TCGA-29-1781 | SMG7      | ENST00000347615     | p.R881K  | c.2642G>A | Unverified | AAC | AGA | TCT | 2 | G | A |
| TCGA-29-1781 | SMG7_ENST | ENST00000507469     | p.R835K  | c.2504G>A | Unverified | AAC | AGA | TCT | 2 | G | A |
| TCGA-24-1843 | SMOC2     | ENST00000354536     | p.R203H  | c.608G>A  | Unverified | TCA | CGT | TAC | 2 | G | A |
| TCGA-61-1738 | SMTNL1    | ENST00000457912     | p.R499H  | c.1496G>A | Unverified | TAC | CGC | AGC | 2 | G | A |
| TCGA-61-1738 | SMTNL1    | ENST00000457912     | p.R499H  | c.1496G>A | Unverified | TAC | CGC | AGC | 2 | G | A |
| TCGA-61-1738 | SMTNL1_EN | ENST00000457912_v65 | p.R499H  | c.1496G>A | Unverified | TAC | CGC | AGC | 2 | G | A |
| TCGA-61-1738 | SMTNL1_EN | ENST00000457912_v65 | p.R499H  | c.1496G>A | Unverified | TAC | CGC | AGC | 2 | G | A |
| TCGA-29-1768 | SNAP23    | ENST00000249647     | p.D65N   | c.193G>A  | Unverified | AAG | GAC | ATG | 1 | G | A |
| TCGA-30-1855 | SND1      | ENST00000354725     | p.L323L  | c.969G>A  | Unverified | AGG | CTG | AGA | 3 | G | A |
| TCGA-61-1998 | SNIP1     | ENST00000296215     | p.P46P   | c.138G>A  | Unverified | CGT | CCG | GAC | 3 | G | A |
| TCGA-13-0919 | SNPH      | ENST00000381873     | p.E199E  | c.597G>A  | Verified   | GGG | GAG | TCA | 3 | G | A |
| TCGA-61-1915 | SNRNP40   | ENST00000263694     | p.V112V  | c.336G>A  | Unverified | GCA | GTG | ATG | 3 | G | A |
| TCGA-10-0930 | SNRPD2P1  | ENST00000277860     | p.R19Q   | c.56G>A   | Verified   | AAG | CGA | GAG | 2 | G | A |
| TCGA-10-0930 | SNRPD2P1  | ENST00000277860     | p.R19Q   | c.56G>A   | Verified   | AAG | CGA | GAG | 2 | G | A |
| TCGA-29-1776 | SNTB1     | ENST00000395601     | p.E364K  | c.1090G>A | Unverified | aag | gaa | gcc | 1 | G | A |
| TCGA-24-2035 | SNTG1     | ENST00000518864     | p.C116Y  | c.347G>A  | Verified   | AAA | TGT | AGA | 2 | G | A |
| TCGA-04-1343 | SOCS5     | ENST00000306503     | p.R429Q  | c.1286G>A | Verified   | gcc | cga | att | 2 | G | A |
| TCGA-25-1313 | SOCS6     | ENST00000397942     | p.R140Q  | c.419G>A  | Unverified | ctg | cgg | ccc | 2 | G | A |
| TCGA-29-1699 | SORBS2    | ENST00000284776     | p.G831S  | c.2491G>A | Unverified | ggc | ggt | gca | 1 | G | A |
| TCGA-04-1651 | SORCS1    | ENST00000263054     | p.R337K  | c.1010G>A | Unverified | GCC | AGA | ACT | 2 | G | A |
| TCGA-04-1651 | SORCS1    | ENST00000263054     | p.R337K  | c.1010G>A | Unverified | GCC | AGA | ACT | 2 | G | A |
| TCGA-04-1651 | SORCS1_EN | ENST00000344440     | p.R337K  | c.1010G>A | Unverified | GCC | AGA | ACT | 2 | G | A |
| TCGA-04-1651 | SORCS1_EN | ENST00000344440     | p.R337K  | c.1010G>A | Unverified | GCC | AGA | ACT | 2 | G | A |
| TCGA-13-0887 | SORCS2    | NM_020777.1         | p.G443S  | c.1327G>A | Verified   | gag | ggc | ctc | 1 | G | A |
| TCGA-04-1331 | SORCS2    | NM_020777.1         | p.R552Q  | c.1655G>A | Unverified | tgc | cgg | gac | 2 | G | A |
| TCGA-24-2290 | SORL1     | ENST00000260197     | p.D1267N | c.3799G>A | Verified   | TCC | GAT | GAA | 1 | G | A |

|              |            |                 |          |            |            |     |     |     |   |   |   |
|--------------|------------|-----------------|----------|------------|------------|-----|-----|-----|---|---|---|
| TCGA-24-2290 | SORL1      | ENST00000260197 | p.D1267N | c.3799G>A  | Verified   | TCC | GAT | GAA | 1 | G | A |
| TCGA-04-1338 | SOSTDC1    | ENST00000307068 | p.G119R  | c.355G>A   | Verified   | TAT | GGA | ACA | 1 | G | A |
| TCGA-13-0900 | SOX30      | ENST00000265007 | p.P726P  | c.2178G>A  | Verified   | GCC | CCG | ACA | 3 | G | A |
| TCGA-25-2400 | SPAG7      | ENST00000206020 | p.V194M  | c.580G>A   | Verified   | CCC | GTG | GCC | 1 | G | A |
| TCGA-23-1117 | SPATA5L1   | ENST00000305560 | p.P728P  | c.2184G>A  | Verified   | AAA | CCG | TCG | 3 | G | A |
| TCGA-23-1117 | SPATA5L1   | ENST00000305560 | p.P728P  | c.2184G>A  | Verified   | AAA | CCG | TCG | 3 | G | A |
| TCGA-61-1740 | SPEF2      | ENST00000282469 | p.E230K  | c.688G>A   | Unverified | CTC | GAG | GCC | 1 | G | A |
| TCGA-61-1740 | SPEF2_ENST | ENST00000356031 | p.E230K  | c.688G>A   | Unverified | CTC | GAG | GCC | 1 | G | A |
| TCGA-61-1907 | SPEN       | ENST00000375759 | p.G2688R | c.8062G>A  | Unverified | gct | ggg | ccc | 1 | G | A |
| TCGA-61-1910 | SPG7       | ENST00000268704 | p.V662V  | c.1986G>A  | Unverified | atg | gtg | aag | 3 | G | A |
| TCGA-24-2280 | SPG7       | ENST00000268704 | p.L65L   | c.195G>A   | Unverified | caa | ttg | aga | 3 | G | A |
| TCGA-13-0906 | SPHKAP     | XM_051221.5     | p.P756P  | c.2268G>A  | Verified   | gat | ccg | ggt | 3 | G | A |
| TCGA-24-0979 | SPHKAP     | XM_051221.5     | p.L1387L | c.4161G>A  | Verified   | tct | ttg | agc | 3 | G | A |
| TCGA-04-1530 | SPINT4     | ENST00000279058 | p.C34Y   | c.101G>A   | Verified   | ATA | TGT | GGA | 2 | G | A |
| TCGA-13-1497 | SPOCD1     | ENST00000360482 | p.E1003E | c.3009G>A  | Verified   | CTG | GAG | GTC | 3 | G | A |
| TCGA-61-1915 | SPPL2A     | ENST00000261854 | p.?      | c.585-1G>A | Unverified | gaa | ttg | gaa | 3 | G | A |
| TCGA-13-1510 | SPR        | ENST00000234454 | p.V214M  | c.640G>A   | Verified   | TCC | GTG | GAC | 1 | G | A |
| TCGA-13-0904 | SPRR2E     | ENST00000368751 | p.K40K   | c.120G>A   | Verified   | CCA | AAG | TGT | 3 | G | A |
| TCGA-04-1638 | SPTA1      | ENST00000368148 | p.A816T  | c.2446G>A  | Unverified | TCA | GCT | ACT | 1 | G | A |
| TCGA-24-1843 | SPTA1      | ENST00000368148 | p.E1396K | c.4186G>A  | Unverified | CTG | GAG | TTG | 1 | G | A |
| TCGA-30-1718 | SPTA1      | ENST00000368148 | p.R41Q   | c.122G>A   | Unverified | GAG | CGG | GTC | 2 | G | A |
| TCGA-29-1693 | SPTA1      | ENST00000368148 | p.Q1401Q | c.4203G>A  | Unverified | TTC | CAG | GGG | 3 | G | A |
| TCGA-13-0755 | SPTB       | ENST00000389722 | p.R1843Q | c.5528G>A  | Verified   | GAG | CGG | GAG | 2 | G | A |
| TCGA-20-1686 | SPTB       | ENST00000389722 | p.R1682H | c.5045G>A  | Unverified | GAG | CGC | AAG | 2 | G | A |
| TCGA-29-1766 | SPTB       | ENST00000389722 | p.R706H  | c.2117G>A  | Unverified | GCG | CGC | AAG | 2 | G | A |
| TCGA-61-1910 | SPTB       | ENST00000389722 | p.A1884A | c.5652G>A  | Unverified | GCC | GCG | TGG | 3 | G | A |
| TCGA-20-1686 | SPTB_ENSTC | ENST00000542895 | p.R1682H | c.5045G>A  | Unverified | GAG | CGC | AAG | 2 | G | A |
| TCGA-29-1766 | SPTB_ENSTC | ENST00000542895 | p.R706H  | c.2117G>A  | Unverified | GCG | CGC | AAG | 2 | G | A |
| TCGA-61-1910 | SPTB_ENSTC | ENST00000542895 | p.A1884A | c.5652G>A  | Unverified | GCC | GCG | TGG | 3 | G | A |
| TCGA-23-1029 | SRP72      | ENST00000342756 | p.G407D  | c.1220G>A  | Unverified | CCA | GGC | ATG | 2 | G | A |
| TCGA-13-1509 | SRPK1      | ENST00000373825 | p.D468N  | c.1402G>A  | Verified   | CTG | GAC | AAC | 1 | G | A |
| TCGA-29-1764 | SRSF1      | ENST00000258962 | p.R97Q   | c.290G>A   | Unverified | GGC | CGA | GGC | 2 | G | A |
| TCGA-61-2012 | SSH1       | ENST00000326495 | p.R144Q  | c.431G>A   | Verified   | CTC | CGA | CTG | 2 | G | A |
| TCGA-20-1685 | SSH3       | ENST00000308127 | p.T144T  | c.432G>A   | Unverified | GAG | ACG | GTC | 3 | G | A |

|              |            |                 |          |            |            |     |     |     |   |   |   |
|--------------|------------|-----------------|----------|------------|------------|-----|-----|-----|---|---|---|
| TCGA-24-1843 | SSRP1      | ENST00000278412 | p.A704A  | c.2112G>A  | Unverified | tca | gcg | tca | 3 | G | A |
| TCGA-04-1361 | ST18       | ENST00000276480 | p.A92T   | c.274G>A   | Verified   | ACC | GCA | GAG | 1 | G | A |
| TCGA-04-1361 | ST18       | ENST00000276480 | p.A92T   | c.274G>A   | Verified   | ACC | GCA | GAG | 1 | G | A |
| TCGA-25-2400 | ST18       | ENST00000276480 | p.R557H  | c.1670G>A  | Verified   | GGC | CGT | GCC | 2 | G | A |
| TCGA-13-0793 | STARD8     | ENST00000252336 | p.D298N  | c.892G>A   | Unverified | GAT | GAT | GAG | 1 | G | A |
| TCGA-13-0793 | STARD8_EN  | ENST00000252336 | p.D298N  | c.892G>A   | Unverified | GAT | GAT | GAG | 1 | G | A |
| TCGA-13-1501 | STAU1      | ENST00000371856 | p.A242T  | c.724G>A   | Verified   | gcc | gcc | ata | 1 | G | A |
| TCGA-13-1501 | STAU1      | ENST00000371856 | p.A242T  | c.724G>A   | Verified   | gcc | gcc | ata | 1 | G | A |
| TCGA-13-0885 | STAU1      | ENST00000371856 | p.R196Q  | c.587G>A   | Verified   | aaa | cgg | aac | 2 | G | A |
| TCGA-13-0903 | STK33      | ENST00000447869 | p.V490V  | c.1470G>A  | Verified   | CCT | GTG | ACT | 3 | G | A |
| TCGA-04-1342 | STON1-GTF2 | ENST00000394754 | p.V932M  | c.2794G>A  | Verified   | ATC | GTG | CCT | 1 | G | A |
| TCGA-13-0919 | STON1-GTF2 | ENST00000394754 | p.S784S  | c.2352G>A  | Verified   | CAA | TCG | TCA | 3 | G | A |
| TCGA-09-1665 | STRN3      | NM_014574.2     | p.L141L  | c.423G>A   | Unverified | gaa | ctg | aac | 3 | G | A |
| TCGA-30-1718 | STT3B      | ENST00000295770 | p.A378T  | c.1132G>A  | Unverified | ATT | GCA | CCA | 1 | G | A |
| TCGA-25-2400 | STX11      | ENST00000367568 | p.D155N  | c.463G>A   | Verified   | CGC | GAC | AAC | 1 | G | A |
| TCGA-29-1691 | STX16      | ENST00000371132 | p.V68I   | c.202G>A   | Unverified | GAT | GTT | GGC | 1 | G | A |
| TCGA-13-1507 | STXBP1_EN  | ENST00000373299 | p.S593N  | c.1778G>A  | Verified   | ATA | AGC | AGT | 2 | G | A |
| TCGA-24-2035 | SULT1E1    | ENST00000226444 | p.?      | c.591+1G>A | Verified   | AAA | GAG | GAT | 3 | G | A |
| TCGA-13-1488 | SUPT6H     | ENST00000314616 | p.D18N   | c.52G>A    | Verified   | AAT | GAT | GAA | 1 | G | A |
| TCGA-09-2044 | SURF6      | ENST00000372022 | p.E143E  | c.429G>A   | Verified   | TTG | GAG | AAA | 3 | G | A |
| TCGA-29-1703 | SUSD4      | ENST00000344029 | p.E128K  | c.382G>A   | Unverified | ATC | GAA | GAT | 1 | G | A |
| TCGA-29-1703 | SUSD4_EN   | ENST00000343846 | p.E128K  | c.382G>A   | Unverified | ATC | GAA | GAT | 1 | G | A |
| TCGA-04-1338 | SVEP1      | ENST00000401783 | p.V2781I | c.8341G>A  | Verified   | CCA | GTC | ATG | 1 | G | A |
| TCGA-13-0884 | SVEP1      | ENST00000401783 | p.S3346N | c.10037G>A | Verified   | TGG | AGC | CAC | 2 | G | A |
| TCGA-29-1691 | SYNE1      | ENST00000265368 | p.E247K  | c.739G>A   | Unverified | GCC | GAA | ACA | 1 | G | A |
| TCGA-04-1649 | SYNE1      | ENST00000265368 | p.R1165H | c.3494G>A  | Unverified | AAA | CGT | GCC | 2 | G | A |
| TCGA-61-1737 | SYNE1      | ENST00000265368 | p.K866K  | c.2598G>A  | Unverified | TGT | AAG | AAA | 3 | G | A |
| TCGA-29-1691 | SYNE1_EN   | ENST00000265368 | p.E247K  | c.739G>A   | Unverified | GCC | GAA | ACA | 1 | G | A |
| TCGA-04-1649 | SYNE1_EN   | ENST00000265368 | p.R1165H | c.3494G>A  | Unverified | AAA | CGT | GCC | 2 | G | A |
| TCGA-61-1737 | SYNE1_EN   | ENST00000265368 | p.K866K  | c.2598G>A  | Unverified | TGT | AAG | AAA | 3 | G | A |
| TCGA-29-1691 | SYNE1_EN   | ENST00000423061 | p.E254K  | c.760G>A   | Unverified | GCC | GAA | ACA | 1 | G | A |
| TCGA-04-1649 | SYNE1_EN   | ENST00000423061 | p.R1172H | c.3515G>A  | Unverified | AAA | CGT | GCC | 2 | G | A |
| TCGA-61-1737 | SYNE1_EN   | ENST00000423061 | p.K873K  | c.2619G>A  | Unverified | TGT | AAG | AAA | 3 | G | A |
| TCGA-04-1652 | SYNE2      | ENST00000358025 | p.E448K  | c.1342G>A  | Unverified | TTT | GAA | AAT | 1 | G | A |

|              |            |                 |          |            |            |     |     |     |   |   |   |
|--------------|------------|-----------------|----------|------------|------------|-----|-----|-----|---|---|---|
| TCGA-04-1652 | SYNE2      | ENST00000358025 | p.E448K  | c.1342G>A  | Unverified | TTT | GAA | AAT | 1 | G | A |
| TCGA-61-1737 | SYNE2      | ENST00000358025 | p.G6759R | c.20275G>A | Unverified | CAT | GGA | GAA | 1 | G | A |
| TCGA-23-1118 | SYNGAP1    | ENST00000418600 | p.G355R  | c.1063G>A  | Unverified | GCT | GGG | CGC | 1 | G | A |
| TCGA-29-1701 | SYNGAP1    | ENST00000418600 | p.G991R  | c.2971G>A  | Unverified | TCC | GGG | GTC | 1 | G | A |
| TCGA-23-1118 | SYNGAP1_EI | ENST00000293748 | p.G355R  | c.1063G>A  | Unverified | GCT | GGG | CGC | 1 | G | A |
| TCGA-29-1701 | SYNGAP1_EI | ENST00000293748 | p.G991R  | c.2971G>A  | Unverified | TCC | GGG | GTC | 1 | G | A |
| TCGA-13-0762 | SYNPO2     | ENST00000307142 | p.S243S  | c.729G>A   | Verified   | AAT | TCG | ATC | 3 | G | A |
| TCGA-13-0762 | SYNPO2     | ENST00000307142 | p.S243S  | c.729G>A   | Verified   | AAT | TCG | ATC | 3 | G | A |
| TCGA-23-1117 | SYT9       | ENST00000318881 | p.K479K  | c.1437G>A  | Verified   | CGG | AAG | CCC | 3 | G | A |
| TCGA-23-1117 | SYT9       | ENST00000318881 | p.K479K  | c.1437G>A  | Verified   | CGG | AAG | CCC | 3 | G | A |
| TCGA-09-0369 | SZT2       | ENST00000372442 | p.V704I  | c.2110G>A  | Verified   | CCA | GTT | GGA | 1 | G | A |
| TCGA-09-0369 | SZT2       | ENST00000372442 | p.V704I  | c.2110G>A  | Verified   | CCA | GTT | GGA | 1 | G | A |
| TCGA-29-2427 | SZT2       | ENST00000372442 | p.R995R  | c.2985G>A  | Verified   | TTG | CGG | ACT | 3 | G | A |
| TCGA-04-1652 | TACC2      | ENST00000369005 | p.R606H  | c.1817G>A  | Unverified | AAG | CGT | GAT | 2 | G | A |
| TCGA-04-1652 | TACC2      | ENST00000369005 | p.R606H  | c.1817G>A  | Unverified | AAG | CGT | GAT | 2 | G | A |
| TCGA-13-1497 | TACC2      | ENST00000369005 | p.P100P  | c.300G>A   | Verified   | CCA | CCG | TCC | 3 | G | A |
| TCGA-04-1343 | TAF1       | ENST00000373790 | p.G626D  | c.1877G>A  | Verified   | ttt | ggt | gca | 2 | G | A |
| TCGA-04-1638 | TAF1L      | ENST00000242310 | p.D479N  | c.1435G>A  | Unverified | gat | gat | gac | 1 | G | A |
| TCGA-23-2077 | TAF6L      | ENST00000294168 | p.A79T   | c.235G>A   | Verified   | GAG | GCT | GTG | 1 | G | A |
| TCGA-04-1367 | TANC1      | ENST00000263635 | p.L660L  | c.1980G>A  | Verified   | GAC | CTG | CAC | 3 | G | A |
| TCGA-24-1431 | TANC2      | ENST00000389520 | p.R1349K | c.4046G>A  | Verified   | AGC | AGA | CAG | 2 | G | A |
| TCGA-13-0905 | TARBP1     | ENST00000040877 | p.W893*  | c.2678G>A  | Verified   | CAA | TGG | GTG | 2 | G | A |
| TCGA-30-1855 | TARBP1     | ENST00000040877 | p.L638L  | c.1914G>A  | Unverified | TCT | CTG | ATG | 3 | G | A |
| TCGA-23-1110 | TARS       | ENST00000265112 | p.G43S   | c.127G>A   | Verified   | GGA | GGT | CGA | 1 | G | A |
| TCGA-24-1849 | TAS1R2     | ENST00000375371 | p.A658T  | c.1972G>A  | Unverified | TGC | GCC | TTC | 1 | G | A |
| TCGA-13-1498 | TAS1R2     | ENST00000375371 | p.R707H  | c.2120G>A  | Verified   | ACC | CGT | ACT | 2 | G | A |
| TCGA-13-0762 | TAS2R20    | ENST00000538986 | p.V141I  | c.421G>A   | Unverified | TTG | GTT | TGT | 1 | G | A |
| TCGA-13-0762 | TAS2R20    | ENST00000538986 | p.V141I  | c.421G>A   | Unverified | TTG | GTT | TGT | 1 | G | A |
| TCGA-24-2024 | TAS2R40    | ENST00000408947 | p.T181T  | c.543G>A   | Verified   | TCC | ACG | GAG | 3 | G | A |
| TCGA-24-1844 | TBC1D14    | ENST00000340816 | p.A251T  | c.751G>A   | Unverified | AAA | GCG | CCA | 1 | G | A |
| TCGA-24-1844 | TBC1D14_EI | ENST00000409757 | p.A266T  | c.796G>A   | Unverified | AAA | GCG | CCA | 1 | G | A |
| TCGA-29-1770 | TBC1D22B   | ENST00000373491 | p.E250K  | c.748G>A   | Unverified | ATT | GAA | CAG | 1 | G | A |
| TCGA-24-1563 | TBC1D28    | ENST00000345096 | p.A110A  | c.330G>A   | Verified   | CGG | GCG | TTG | 3 | G | A |
| TCGA-29-1693 | TBC1D2B    | ENST00000409931 | p.R668H  | c.2003G>A  | Unverified | CAC | CGT | TCC | 2 | G | A |

|              |            |                 |          |           |            |     |     |     |   |   |   |
|--------------|------------|-----------------|----------|-----------|------------|-----|-----|-----|---|---|---|
| TCGA-29-1693 | TBC1D2B_EI | ENST00000300584 | p.R668H  | c.2003G>A | Unverified | CAC | CGT | TCC | 2 | G | A |
| TCGA-29-1777 | TBC1D3P2   | ENST00000338790 | p.G40E   | c.119G>A  | Unverified | TTT | GGA | AGC | 2 | G | A |
| TCGA-29-1769 | TBP        | ENST00000230354 | p.Q76Q   | c.228G>A  | Unverified | CAG | CAG | CAG | 3 | G | A |
| TCGA-29-1698 | TBRG4      | ENST00000258770 | p.R175H  | c.524G>A  | Unverified | TGG | CGC | ATG | 2 | G | A |
| TCGA-13-0886 | TBX5       | ENST00000310346 | p.S372S  | c.1116G>A | Verified   | GAG | TCG | GCA | 3 | G | A |
| TCGA-24-0975 | TCEAL2     | ENST00000372780 | p.P57P   | c.171G>A  | Unverified | gaa | ccg | tta | 3 | G | A |
| TCGA-29-1695 | TCEB3B     | ENST00000332567 | p.A543T  | c.1627G>A | Unverified | GAC | GCC | CTC | 1 | G | A |
| TCGA-24-1103 | TCEB3B     | ENST00000332567 | p.L529L  | c.1587G>A | Verified   | ACG | CTG | CGC | 3 | G | A |
| TCGA-29-1763 | TCERG1     | ENST00000296702 | p.A651T  | c.1951G>A | Unverified | GCT | GCC | CGA | 1 | G | A |
| TCGA-61-1904 | TCERG1L    | ENST00000368643 | p.R262Q  | c.785G>A  | Unverified | CTG | CGG | GCC | 2 | G | A |
| TCGA-61-2012 | TCHH       | ENST00000368804 | p.E547E  | c.1641G>A | Verified   | CGC | GAG | CAG | 3 | G | A |
| TCGA-61-1737 | TCN1       | ENST00000257264 | p.A191T  | c.571G>A  | Unverified | ATG | GCT | GTC | 1 | G | A |
| TCGA-24-1104 | TCOF1      | ENST00000323668 | p.G1044R | c.3130G>A | Verified   | AAA | GGG | ACC | 1 | G | A |
| TCGA-25-1313 | TCTE1      | ENST00000371505 | p.C142Y  | c.425G>A  | Verified   | GTG | TGC | CAC | 2 | G | A |
| TCGA-20-1683 | TDRD5      | ENST00000367614 | p.D629N  | c.1885G>A | Unverified | GTA | GAT | GGA | 1 | G | A |
| TCGA-61-1998 | TDRD5      | ENST00000367614 | p.R925H  | c.2774G>A | Verified   | AAG | CGT | CAA | 2 | G | A |
| TCGA-25-2393 | TECR       | ENST00000215567 | p.R159H  | c.476G>A  | Unverified | TTG | CGC | AAC | 2 | G | A |
| TCGA-20-0990 | TECTA      | ENST00000392793 | p.P1461P | c.4383G>A | Verified   | GAC | CCG | CGC | 3 | G | A |
| TCGA-29-1761 | TEKT4      | ENST00000295201 | p.A55T   | c.163G>A  | Unverified | CAG | GCC | TTC | 1 | G | A |
| TCGA-09-2044 | TELO2      | ENST00000262319 | p.L288L  | c.864G>A  | Unverified | AAC | CTG | GTG | 3 | G | A |
| TCGA-30-1714 | TEP1       | ENST00000262715 | p.R1328Q | c.3983G>A | Unverified | GCC | CGG | CTG | 2 | G | A |
| TCGA-61-1737 | TET1_ENST0 | ENST00000373644 | p.K1653K | c.4959G>A | Unverified | AGC | AAG | GAA | 3 | G | A |
| TCGA-24-2280 | TET3       | ENST00000409262 | p.G644E  | c.1931G>A | Unverified | GGA | GGA | CAG | 2 | G | A |
| TCGA-09-1665 | TEX11      | ENST00000374333 | p.V639V  | c.1917G>A | Verified   | cca | gtg | atg | 3 | G | A |
| TCGA-13-0793 | TEX14      | ENST00000349033 | p.C179Y  | c.536G>A  | Verified   | TGG | TGT | GGG | 2 | G | A |
| TCGA-30-1718 | TEX264     | ENST00000395057 | p.V131V  | c.393G>A  | Unverified | CAT | GTG | GTG | 3 | G | A |
| TCGA-24-2289 | TFE3_ENST0 | ENST00000336239 | p.A243A  | c.729G>A  | Unverified | AGT | GCG | CCC | 3 | G | A |
| TCGA-23-1124 | TFRC       | ENST00000360110 | p.R155H  | c.464G>A  | Verified   | CCT | CGT | GAG | 2 | G | A |
| TCGA-61-1733 | TG         | ENST00000220616 | p.E1561K | c.4681G>A | Unverified | CTT | GAG | GAC | 1 | G | A |
| TCGA-61-1733 | TG         | ENST00000220616 | p.E1561K | c.4681G>A | Unverified | CTT | GAG | GAC | 1 | G | A |
| TCGA-61-1895 | TG         | ENST00000220616 | p.G624R  | c.1870G>A | Unverified | GAA | GGA | AGC | 1 | G | A |
| TCGA-09-2051 | TG         | ENST00000220616 | p.R2336Q | c.7007G>A | Unverified | TAC | CGA | GTG | 2 | G | A |
| TCGA-13-0900 | TG         | ENST00000220616 | p.C237Y  | c.710G>A  | Verified   | CAC | TGT | GCT | 2 | G | A |
| TCGA-29-1764 | TG         | ENST00000220616 | p.V742V  | c.2226G>A | Unverified | ACG | GTG | CAG | 3 | G | A |



|              |           |                    |          |             |            |     |     |     |   |   |   |
|--------------|-----------|--------------------|----------|-------------|------------|-----|-----|-----|---|---|---|
| TCGA-61-2009 | TGFBR2    | NM_003242          | p.R479Q  | c.1436G>A   | Verified   | gtg | cgg | gag | 2 | G | A |
| TCGA-24-1469 | TGM3      | ENST00000381458    | p.R608Q  | c.1823G>A   | Verified   | GTG | CGG | AAG | 2 | G | A |
| TCGA-30-1718 | TGS1      | ENST00000260129    | p.M12I   | c.36G>A     | Unverified | GAA | ATG | TTT | 3 | G | A |
| TCGA-20-1687 | THADA     | ENST00000405975    | p.V43M   | c.127G>A    | Unverified | tgt | gtg | caa | 1 | G | A |
| TCGA-61-1907 | THEMIS    | ENST00000368248    | p.K460K  | c.1380G>A   | Unverified | GTG | AAG | GTG | 3 | G | A |
| TCGA-04-1362 | THOC2     | OTTHUMT00000058153 | p.D111N  | c.331G>A    | Verified   | agt | gat | tta | 1 | G | A |
| TCGA-04-1652 | THOC2_ENS | ENST00000245838    | p.A4A    | c.12G>A     | Unverified | GCC | GCG | GCT | 3 | G | A |
| TCGA-04-1652 | THOC2_ENS | ENST00000245838    | p.A4A    | c.12G>A     | Unverified | GCC | GCG | GCT | 3 | G | A |
| TCGA-24-1464 | THOP1     | ENST00000307741    | p.D109N  | c.325G>A    | Verified   | TTC | GAC | GTG | 1 | G | A |
| TCGA-13-0886 | THSD1     | ENST00000258613    | p.L673L  | c.2019G>A   | Unverified | ACT | CTG | ACT | 3 | G | A |
| TCGA-29-1691 | TIGD2     | ENST00000317005    | p.G403R  | c.1207G>A   | Unverified | GAA | GGA | GCC | 1 | G | A |
| TCGA-04-1343 | TIGD4     | ENST00000304337    | p.S159S  | c.477G>A    | Verified   | CCT | TCG | ACT | 3 | G | A |
| TCGA-04-1530 | TIMELESS  | ENST00000553532    | p.R831R  | c.2493G>A   | Unverified | CTT | CGG | GAG | 3 | G | A |
| TCGA-13-0916 | TIMM44    | ENST00000270538    | p.R305Q  | c.914G>A    | Verified   | CTC | CGG | GTG | 2 | G | A |
| TCGA-24-1463 | TKTL1     | ENST00000369915    | p.D315N  | c.943G>A    | Verified   | GGT | GAC | ACC | 1 | G | A |
| TCGA-61-2012 | TKTL1     | ENST00000369915    | p.S43N   | c.128G>A    | Verified   | ACG | AGC | TCC | 2 | G | A |
| TCGA-13-1507 | TLN2      | ENST00000306829    | p.?      | c.7375-1G>A | Verified   | CAG | GCG | GCA | 1 | G | A |
| TCGA-24-1431 | TLN2      | ENST00000306829    | p.D2341N | c.7021G>A   | Verified   | CTG | GAC | TTT | 1 | G | A |
| TCGA-04-1347 | TLR1      | ENST00000308979    | p.A476T  | c.1426G>A   | Unverified | GTT | GCT | TTC | 1 | G | A |
| TCGA-29-1761 | TLR2      | ENST00000260010    | p.E383K  | c.1147G>A   | Unverified | TGT | GAG | GAT | 1 | G | A |
| TCGA-13-0760 | TLR4      | ENST00000355622    | p.A814T  | c.2440G>A   | Verified   | AAA | GCC | CTG | 1 | G | A |
| TCGA-23-2078 | TLR4      | ENST00000355622    | p.G830E  | c.2489G>A   | Verified   | ACA | GGA | TGC | 2 | G | A |
| TCGA-13-1512 | TM4SF18   | ENST00000296059    | p.A112T  | c.334G>A    | Verified   | TCT | GCC | TTG | 1 | G | A |
| TCGA-20-1683 | TM4SF20   | ENST00000304568    | p.G220E  | c.659G>A    | Unverified | TGT | GGA | GTC | 2 | G | A |
| TCGA-61-1914 | TMCO7_ENS | ENST00000261778    | p.R745H  | c.2234G>A   | Unverified | CTC | CGC | ATC | 2 | G | A |
| TCGA-13-0885 | TMED1     | ENST00000214869    | p.E142K  | c.424G>A    | Verified   | GTG | GAG | CCC | 1 | G | A |
| TCGA-04-1343 | TMEM108   | ENST00000321871    | p.G288S  | c.862G>A    | Verified   | GGT | GGT | TCT | 1 | G | A |
| TCGA-04-1652 | TMEM119   | ENST00000392806    | p.E43E   | c.129G>A    | Unverified | GGG | GAG | GCC | 3 | G | A |
| TCGA-04-1652 | TMEM119   | ENST00000392806    | p.E43E   | c.129G>A    | Unverified | GGG | GAG | GCC | 3 | G | A |
| TCGA-20-1683 | TMEM120B  | ENST00000342607    | p.R174R  | c.522G>A    | Unverified | ATT | CGG | GAG | 3 | G | A |
| TCGA-20-1683 | TMEM120B  | ENST00000449592    | p.R174R  | c.522G>A    | Unverified | ATT | CGG | GAG | 3 | G | A |
| TCGA-09-1674 | TMEM130   | ENST00000339375    | p.W108*  | c.323G>A    | Unverified | GTC | TGG | GTC | 2 | G | A |
| TCGA-29-1696 | TMEM130   | ENST00000339375    | p.P375P  | c.1125G>A   | Unverified | AAC | CCG | GAG | 3 | G | A |
| TCGA-29-1696 | TMEM130   | ENST00000339375    | p.P375P  | c.1125G>A   | Unverified | AAC | CCG | GAG | 3 | G | A |

|              |            |                 |          |           |            |     |     |     |   |   |   |
|--------------|------------|-----------------|----------|-----------|------------|-----|-----|-----|---|---|---|
| TCGA-13-1498 | TMEM132D   | ENST00000422113 | p.E557E  | c.1671G>A | Verified   | GAA | GAG | GAG | 3 | G | A |
| TCGA-13-0792 | TMEM136    | ENST00000529187 | p.W17*   | c.50G>A   | Verified   | TTT | TGG | TCT | 2 | G | A |
| TCGA-23-1111 | TMEM139    | ENST00000359333 | p.A137T  | c.409G>A  | Unverified | AGA | GCC | AAA | 1 | G | A |
| TCGA-09-1674 | TMEM14A    | ENST00000211314 | p.R51Q   | c.152G>A  | Unverified | AAA | CGA | GAT | 2 | G | A |
| TCGA-13-0900 | TMEM150C   | ENST00000449862 | p.C66Y   | c.197G>A  | Verified   | AGC | TGT | GTG | 2 | G | A |
| TCGA-24-2024 | TMEM169    | ENST00000295658 | p.R56H   | c.167G>A  | Verified   | TAC | CGC | TCA | 2 | G | A |
| TCGA-13-0755 | TMEM186    | ENST00000333050 | p.R201H  | c.602G>A  | Verified   | GAG | CGT | TTC | 2 | G | A |
| TCGA-13-0904 | TMEM2      | ENST00000377044 | p.P1252P | c.3756G>A | Verified   | GAT | CCG | TGC | 3 | G | A |
| TCGA-30-1714 | TMEM22     | ENST00000446465 | p.D35N   | c.103G>A  | Unverified | GGC | GAT | GAT | 1 | G | A |
| TCGA-20-1683 | TMEM30A    | ENST00000230461 | p.G203D  | c.608G>A  | Unverified | AAA | GGT | ATT | 2 | G | A |
| TCGA-61-1907 | TMEM48     | ENST00000371429 | p.A660T  | c.1978G>A | Unverified | TCT | GCA | GAA | 1 | G | A |
| TCGA-24-2289 | TMEM63B    | ENST00000259746 | p.A687A  | c.2061G>A | Unverified | GCC | GCG | CCC | 3 | G | A |
| TCGA-04-1542 | TMLHE      | ENST00000334398 | p.V74I   | c.220G>A  | Verified   | tac | gtc | tgg | 1 | G | A |
| TCGA-29-1770 | TMPPE      | ENST00000342462 | p.A11T   | c.31G>A   | Unverified | GGC | GCG | AAG | 1 | G | A |
| TCGA-20-0991 | TNFSF14    | ENST00000245912 | p.G188R  | c.562G>A  | Unverified | tgc | gga | cgg | 1 | G | A |
| TCGA-13-1498 | TNFSF8     | ENST00000223795 | p.D215N  | c.643G>A  | Verified   | ata | gat | aca | 1 | G | A |
| TCGA-09-2051 | TNIK       | ENST00000436636 | p.R1008K | c.3023G>A | Unverified | CTT | AGG | CAA | 2 | G | A |
| TCGA-20-1683 | TNK2       | ENST00000333602 | p.E4E    | c.12G>A   | Unverified | CCA | GAG | GAG | 3 | G | A |
| TCGA-13-0761 | TNK2       | ENST00000333602 | p.R99R   | c.297G>A  | Verified   | TTC | CGG | AAG | 3 | G | A |
| TCGA-13-0761 | TNK2       | ENST00000333602 | p.R99R   | c.297G>A  | Verified   | TTC | CGG | AAG | 3 | G | A |
| TCGA-20-1683 | TNK2_ENST( | ENST00000333602 | p.E4E    | c.12G>A   | Unverified | CCA | GAG | GAG | 3 | G | A |
| TCGA-20-1683 | TNK2_ENST( | ENST00000381916 | p.E67E   | c.201G>A  | Unverified | CCA | GAG | GAG | 3 | G | A |
| TCGA-13-0761 | TNK2_ENST( | ENST00000381916 | p.R162R  | c.486G>A  | Verified   | TTC | CGG | AAG | 3 | G | A |
| TCGA-13-0761 | TNK2_ENST( | ENST00000381916 | p.R162R  | c.486G>A  | Verified   | TTC | CGG | AAG | 3 | G | A |
| TCGA-13-0916 | TNN        | ENST00000239462 | p.G1046S | c.3136G>A | Verified   | AAG | GGT | GGT | 1 | G | A |
| TCGA-13-1505 | TNNI3K     | ENST00000326637 | p.G351S  | c.1051G>A | Unverified | cac | ggt | cac | 1 | G | A |
| TCGA-61-1906 | TNPO3      | ENST00000265388 | p.L324L  | c.972G>A  | Unverified | act | ctg | gag | 3 | G | A |
| TCGA-61-1906 | TNPO3      | ENST00000265388 | p.L324L  | c.972G>A  | Unverified | act | ctg | gag | 3 | G | A |
| TCGA-24-1616 | TNPO3      | ENST00000265388 | p.R797R  | c.2391G>A | Verified   | atg | agg | ttt | 3 | G | A |
| TCGA-61-1906 | TNPO3_ENS  | ENST00000393245 | p.L324L  | c.972G>A  | Unverified | ACT | CTG | GAG | 3 | G | A |
| TCGA-61-1906 | TNPO3_ENS  | ENST00000393245 | p.L324L  | c.972G>A  | Unverified | ACT | CTG | GAG | 3 | G | A |
| TCGA-25-1313 | TNRC18_EN' | ENST00000430969 | p.A832T  | c.2494G>A | Verified   | ATG | GCC | CCT | 1 | G | A |
| TCGA-13-0913 | TNS4       | ENST00000254051 | p.G597E  | c.1790G>A | Verified   | ACT | GGA | GCC | 2 | G | A |
| TCGA-04-1367 | TNXB_ENST( | ENST00000375247 | p.S1474S | c.4422G>A | Verified   | GAT | TCG | CTG | 3 | G | A |

|              |           |                 |         |            |            |     |     |     |   |   |   |
|--------------|-----------|-----------------|---------|------------|------------|-----|-----|-----|---|---|---|
| TCGA-13-0906 | TOM1      | ENST00000449058 | p.E363K | c.1087G>A  | Unverified | CTG | GAA | GAT | 1 | G | A |
| TCGA-25-1326 | TONSL     | ENST00000292520 | p.R690H | c.2069G>A  | Unverified | CCC | CGC | CCC | 2 | G | A |
| TCGA-24-2262 | TOP3A     | ENST00000321105 | p.R548Q | c.1643G>A  | Unverified | gcc | cgg | atg | 2 | G | A |
| TCGA-23-1809 | TOP3B     | ENST00000357179 | p.V136I | c.406G>A   | Unverified | CCC | GTC | ATG | 1 | G | A |
| TCGA-23-1809 | TOP3B_ENS | ENST00000357179 | p.V136I | c.406G>A   | Unverified | CCC | GTC | ATG | 1 | G | A |
| TCGA-13-0755 | TOPORS    | ENST00000360538 | p.V128I | c.382G>A   | Verified   | TGT | GTA | CAG | 1 | G | A |
| TCGA-04-1338 | TP53      | ENST00000269305 | p.G245S | c.733G>A   | Verified   | GGC | GGC | ATG | 1 | G | A |
| TCGA-04-1362 | TP53      | ENST00000269305 | p.?     | c.673-1G>A | Verified   | GAG | GTT | GGC | 1 | G | A |
| TCGA-09-2049 | TP53      | ENST00000269305 | p.G245S | c.733G>A   | Verified   | GGC | GGC | ATG | 1 | G | A |
| TCGA-13-0886 | TP53      | ENST00000269305 | p.V272M | c.814G>A   | Verified   | GAG | GTG | CGT | 1 | G | A |
| TCGA-24-1103 | TP53      | ENST00000269305 | p.?     | c.919+1G>A | Verified   | CGA | GCA | CTG | 1 | G | A |
| TCGA-24-1435 | TP53      | ENST00000269305 | p.V216M | c.646G>A   | Verified   | AGT | GTG | GTG | 1 | G | A |
| TCGA-24-2024 | TP53      | ENST00000269305 | p.V272M | c.814G>A   | Verified   | GAG | GTG | CGT | 1 | G | A |
| TCGA-25-1326 | TP53      | ENST00000269305 | p.E286K | c.856G>A   | Verified   | GAG | GAA | GAG | 1 | G | A |
| TCGA-61-2102 | TP53      | ENST00000269305 | p.G266R | c.796G>A   | Verified   | CTG | GGA | CGG | 1 | G | A |
| TCGA-04-1530 | TP53      | ENST00000269305 | p.R273H | c.818G>A   | Verified   | GTG | CGT | GTT | 2 | G | A |
| TCGA-04-1542 | TP53      | ENST00000269305 | p.R273H | c.818G>A   | Verified   | GTG | CGT | GTT | 2 | G | A |
| TCGA-13-0761 | TP53      | ENST00000269305 | p.R273H | c.818G>A   | Verified   | GTG | CGT | GTT | 2 | G | A |
| TCGA-13-0761 | TP53      | ENST00000269305 | p.R273H | c.818G>A   | Verified   | GTG | CGT | GTT | 2 | G | A |
| TCGA-13-0795 | TP53      | ENST00000269305 | p.C135Y | c.404G>A   | Verified   | TTT | TGC | CAA | 2 | G | A |
| TCGA-13-0893 | TP53      | ENST00000269305 | p.G245D | c.734G>A   | Verified   | GGC | GGC | ATG | 2 | G | A |
| TCGA-13-0900 | TP53      | ENST00000269305 | p.R273H | c.818G>A   | Verified   | GTG | CGT | GTT | 2 | G | A |
| TCGA-13-0904 | TP53      | ENST00000269305 | p.G279E | c.836G>A   | Verified   | CCT | GGG | AGA | 2 | G | A |
| TCGA-13-1496 | TP53      | ENST00000269305 | p.R248Q | c.743G>A   | Verified   | AAC | CGG | AGG | 2 | G | A |
| TCGA-13-1499 | TP53      | ENST00000269305 | p.R248Q | c.743G>A   | Verified   | AAC | CGG | AGG | 2 | G | A |
| TCGA-23-1032 | TP53      | ENST00000269305 | p.R248Q | c.743G>A   | Verified   | AAC | CGG | AGG | 2 | G | A |
| TCGA-23-1110 | TP53      | ENST00000269305 | p.C176Y | c.527G>A   | Verified   | CGC | TGC | CCC | 2 | G | A |
| TCGA-23-1122 | TP53      | ENST00000269305 | p.R175H | c.524G>A   | Verified   | AGG | CGC | TGC | 2 | G | A |
| TCGA-23-1123 | TP53      | ENST00000269305 | p.C176Y | c.527G>A   | Verified   | CGC | TGC | CCC | 2 | G | A |
| TCGA-23-1123 | TP53      | ENST00000269305 | p.C176Y | c.527G>A   | Verified   | CGC | TGC | CCC | 2 | G | A |
| TCGA-23-2077 | TP53      | ENST00000269305 | p.R175H | c.524G>A   | Verified   | AGG | CGC | TGC | 2 | G | A |
| TCGA-24-0979 | TP53      | ENST00000269305 | p.R248Q | c.743G>A   | Verified   | AAC | CGG | AGG | 2 | G | A |
| TCGA-25-1318 | TP53      | ENST00000269305 | p.R175H | c.524G>A   | Verified   | AGG | CGC | TGC | 2 | G | A |
| TCGA-25-1318 | TP53      | ENST00000269305 | p.R175H | c.524G>A   | Verified   | AGG | CGC | TGC | 2 | G | A |

|              |            |                 |          |             |            |     |     |     |   |   |   |
|--------------|------------|-----------------|----------|-------------|------------|-----|-----|-----|---|---|---|
| TCGA-29-2427 | TP53       | ENST00000269305 | p.G244D  | c.731G>A    | Verified   | ATG | GGC | GGC | 2 | G | A |
| TCGA-24-1845 | TP53       | ENST00000269305 | p.W53*   | c.159G>A    | Unverified | CAA | TGG | TTC | 3 | G | A |
| TCGA-25-2042 | TP53       | ENST00000269305 | p.E224E  | c.672G>A    | Verified   | CCT | GAG | GTT | 3 | G | A |
| TCGA-13-0885 | TP53       | ENST00000269305 | p.W146*  | c.438G>A    | Verified   | CTG | TGG | GTT | 3 | G | A |
| TCGA-24-1845 | TP53_ENSTC | ENST00000269305 | p.W53*   | c.159G>A    | Unverified | CAA | TGG | TTC | 3 | G | A |
| TCGA-24-1845 | TP53_ENSTC | ENST00000413465 | p.W53*   | c.159G>A    | Unverified | CAA | TGG | TTC | 3 | G | A |
| TCGA-29-1777 | TP63       | ENST00000264731 | p.R643Q  | c.1928G>A   | Unverified | gtg | cga | ttc | 2 | G | A |
| TCGA-29-1701 | TPCN1      | ENST00000335509 | p.D284N  | c.850G>A    | Unverified | CCA | GAT | GTG | 1 | G | A |
| TCGA-29-1701 | TPCN1_ENS  | ENST00000550785 | p.D356N  | c.1066G>A   | Unverified | CCA | GAT | GTG | 1 | G | A |
| TCGA-29-1785 | TPP1       | ENST00000299427 | p.R185H  | c.554G>A    | Unverified | CAA | CGT | CCT | 2 | G | A |
| TCGA-29-1785 | TPP1       | ENST00000299427 | p.R185H  | c.554G>A    | Unverified | CAA | CGT | CCT | 2 | G | A |
| TCGA-24-1435 | TRAF1      | ENST00000373887 | p.V289I  | c.865G>A    | Verified   | acc | gtc | agc | 1 | G | A |
| TCGA-23-1111 | TRAK1      | ENST00000341421 | p.A682T  | c.2044G>A   | Unverified | TCC | GCT | CGT | 1 | G | A |
| TCGA-23-1114 | TRAP1      | ENST00000246957 | p.D557N  | c.1669G>A   | Unverified | GTG | GAT | CAC | 1 | G | A |
| TCGA-04-1361 | TRAPPC10   | ENST00000291574 | p.C23Y   | c.68G>A     | Verified   | ACC | TGT | GCT | 2 | G | A |
| TCGA-04-1361 | TRAPPC10   | ENST00000291574 | p.C23Y   | c.68G>A     | Verified   | ACC | TGT | GCT | 2 | G | A |
| TCGA-09-2056 | TRAPPC8    | ENST00000283351 | p.?      | c.4073+1G>A | Verified   | ACA | AGT | CCA | 2 | G | A |
| TCGA-23-1124 | TRERF1     | ENST00000372922 | p.D1164N | c.3490G>A   | Verified   | gac | gac | gac | 1 | G | A |
| TCGA-23-1124 | TRERF1     | ENST00000372922 | p.D1165N | c.3493G>A   | Verified   | gac | gac | gtc | 1 | G | A |
| TCGA-29-1691 | TRIB3      | ENST00000217233 | p.E204E  | c.612G>A    | Unverified | CTG | GAG | GAC | 3 | G | A |
| TCGA-23-1110 | TRIM10_EN! | ENST00000449742 | p.R473Q  | c.1418G>A   | Unverified | GGC | CGA | GGG | 2 | G | A |
| TCGA-61-1904 | TRIM17     | ENST00000366697 | p.C99Y   | c.296G>A    | Unverified | ctg | tgc | cag | 2 | G | A |
| TCGA-61-1904 | TRIM17_EN! | ENST00000456946 | p.C99Y   | c.296G>A    | Unverified | CTG | TGC | CAG | 2 | G | A |
| TCGA-13-0884 | TRIM21     | ENST00000254436 | p.A437T  | c.1309G>A   | Verified   | tgt | gcc | ttt | 1 | G | A |
| TCGA-13-1497 | TRIM26     | ENST00000453195 | p.R202Q  | c.605G>A    | Verified   | GAG | CGG | GAG | 2 | G | A |
| TCGA-09-2049 | TRIM36     | ENST00000282369 | p.V429I  | c.1285G>A   | Verified   | AAA | GTT | TAT | 1 | G | A |
| TCGA-13-0920 | TRIM39     | ENST00000376656 | p.G436R  | c.1306G>A   | Verified   | AAT | GGG | GAC | 1 | G | A |
| TCGA-23-1124 | TRIM55     | ENST00000315962 | p.V38V   | c.114G>A    | Verified   | gtg | gtg | att | 3 | G | A |
| TCGA-09-2056 | TRIM58     | ENST00000366481 | p.L458L  | c.1374G>A   | Verified   | ATC | TTG | CCA | 3 | G | A |
| TCGA-23-1123 | TRIM67     | NM_001004342.2  | p.G574S  | c.1720G>A   | Verified   | gac | ggt | ctt | 1 | G | A |
| TCGA-23-1123 | TRIM67     | NM_001004342.2  | p.G574S  | c.1720G>A   | Verified   | gac | ggt | ctt | 1 | G | A |
| TCGA-24-0979 | TRIOBP_EN! | ENST00000406386 | p.D813N  | c.2437G>A   | Verified   | CAG | GAC | AAC | 1 | G | A |
| TCGA-61-1998 | TRIP10     | ENST00000313285 | p.D260N  | c.778G>A    | Verified   | gtg | gat | ccc | 1 | G | A |
| TCGA-13-0906 | TRIP12     | ENST00000283943 | p.A179T  | c.535G>A    | Verified   | CTG | GCT | TCA | 1 | G | A |

|              |         |                 |           |            |            |     |     |     |   |   |   |
|--------------|---------|-----------------|-----------|------------|------------|-----|-----|-----|---|---|---|
| TCGA-24-2280 | TRIT1   | ENST00000316891 | p.E145K   | c.433G>A   | Unverified | ACT | GAG | AAA | 1 | G | A |
| TCGA-29-1764 | TROVE2  | ENST00000367444 | p.G68S    | c.202G>A   | Unverified | GAT | GGC | AGA | 1 | G | A |
| TCGA-61-1914 | TROVE2  | ENST00000367444 | p.R149Q   | c.446G>A   | Unverified | CTC | CGG | AAG | 2 | G | A |
| TCGA-61-1915 | TRPM1   | ENST00000397795 | p.L573L   | c.1719G>A  | Unverified | CTT | CTG | GGA | 3 | G | A |
| TCGA-29-2427 | TRPV1   | ENST00000399756 | p.V222M   | c.664G>A   | Verified   | CTG | GTG | GAG | 1 | G | A |
| TCGA-29-1702 | TRPV3   | ENST00000576742 | p.S518S   | c.1554G>A  | Unverified | CTC | TCG | GAT | 3 | G | A |
| TCGA-24-1469 | TRRAP   | ENST00000355540 | p.V1955V  | c.5865G>A  | Verified   | AAG | GTG | TAC | 3 | G | A |
| TCGA-20-1685 | TSFM    | ENST00000454289 | p.S306S   | c.918G>A   | Unverified | GTG | TCG | GTA | 3 | G | A |
| TCGA-23-1117 | TSGA13  | ENST00000356588 | p.D166N   | c.496G>A   | Verified   | TCG | GAT | GAT | 1 | G | A |
| TCGA-23-1117 | TSGA13  | ENST00000356588 | p.D166N   | c.496G>A   | Verified   | TCG | GAT | GAT | 1 | G | A |
| TCGA-13-0893 | TSHZ3   | NM_020856.1     | p.S702S   | c.2106G>A  | Verified   | gag | tcg | acg | 3 | G | A |
| TCGA-29-1695 | TSKS    | ENST00000246801 | p.M90I    | c.270G>A   | Unverified | GCC | ATG | GAG | 3 | G | A |
| TCGA-23-1116 | TSPAN12 | ENST00000222747 | p.L214L   | c.642G>A   | Unverified | TTT | TTG | AGA | 3 | G | A |
| TCGA-29-1783 | TSPAN18 | ENST00000340160 | p.G186R   | c.556G>A   | Unverified | GAC | GGG | GTC | 1 | G | A |
| TCGA-04-1649 | TSSK6   | ENST00000360913 | p.E20K    | c.58G>A    | Unverified | gga | gag | ggc | 1 | G | A |
| TCGA-13-0886 | TTBK1   | ENST00000259750 | p.S524N   | c.1571G>A  | Verified   | ctg | agc | aac | 2 | G | A |
| TCGA-29-1775 | TTC13   | ENST00000366661 | p.D141N   | c.421G>A   | Unverified | AAT | GAC | AGC | 1 | G | A |
| TCGA-13-1512 | TTC13   | ENST00000366661 | p.S549S   | c.1647G>A  | Verified   | AAC | TCG | AAA | 3 | G | A |
| TCGA-24-1422 | TTC15   | ENST00000382110 | p.S52S    | c.156G>A   | Unverified | GCA | TCG | GAA | 3 | G | A |
| TCGA-24-2262 | TTC17   | ENST00000039989 | p.R1003Q  | c.3008G>A  | Verified   | ACC | CGA | ATT | 2 | G | A |
| TCGA-09-1674 | TTC17   | ENST00000039989 | p.T1013T  | c.3039G>A  | Unverified | CAG | ACG | TCC | 3 | G | A |
| TCGA-23-2078 | TTC21A  | ENST00000431162 | p.G609S   | c.1825G>A  | Verified   | GAA | GGC | AGA | 1 | G | A |
| TCGA-13-0924 | TTC25   | ENST00000377543 | p.Q330Q   | c.990G>A   | Verified   | GCC | CAG | ATT | 3 | G | A |
| TCGA-29-1781 | TTC27   | ENST00000317907 | p.V366V   | c.1098G>A  | Unverified | GAA | GTG | GAG | 3 | G | A |
| TCGA-04-1652 | TLL2    | ENST00000239587 | p.V91I    | c.271G>A   | Unverified | CGC | GTT | GAC | 1 | G | A |
| TCGA-04-1652 | TLL2    | ENST00000239587 | p.V91I    | c.271G>A   | Unverified | CGC | GTT | GAC | 1 | G | A |
| TCGA-13-0886 | TLL4    | ENST00000392102 | p.E972K   | c.2914G>A  | Verified   | CCA | GAG | CAT | 1 | G | A |
| TCGA-09-1674 | TTN     | NM_003319       | p.G14510S | c.43528G>A | Unverified | aaa | ggc | tct | 1 | G | A |
| TCGA-29-1711 | TTN     | NM_003319       | p.G1325R  | c.3973G>A  | Unverified | aaa | gga | aat | 1 | G | A |
| TCGA-29-1711 | TTN     | NM_003319       | p.G1325R  | c.3973G>A  | Unverified | aaa | gga | aat | 1 | G | A |
| TCGA-29-1761 | TTN     | NM_003319       | p.V19301I | c.57901G>A | Unverified | gac | gtt | att | 1 | G | A |
| TCGA-29-2427 | TTN     | NM_003319       | p.V865I   | c.2593G>A  | Verified   | acc | gtc | cgt | 1 | G | A |
| TCGA-61-2012 | TTN     | NM_003319       | p.A11785T | c.35353G>A | Verified   | acg | gct | ggc | 1 | G | A |
| TCGA-13-0885 | TTN     | NM_003319       | p.E23401K | c.70201G>A | Verified   | acc | gaa | gga | 1 | G | A |

|              |            |                 |           |            |            |     |     |     |   |   |   |
|--------------|------------|-----------------|-----------|------------|------------|-----|-----|-----|---|---|---|
| TCGA-09-1674 | TTN        | NM_003319       | p.R6038Q  | c.18113G>A | Unverified | tgt | cga | ctc | 2 | G | A |
| TCGA-61-2095 | TTN        | NM_003319       | p.Q17043Q | c.51129G>A | Verified   | tta | cag | tgg | 3 | G | A |
| TCGA-09-1674 | TTN_ENST0C | ENST00000342175 | p.G14702S | c.44104G>A | Unverified | AAA | GGC | TCT | 1 | G | A |
| TCGA-29-1711 | TTN_ENST0C | ENST00000342175 | p.G1325R  | c.3973G>A  | Unverified | AAA | GGA | AAT | 1 | G | A |
| TCGA-29-1711 | TTN_ENST0C | ENST00000342175 | p.G1325R  | c.3973G>A  | Unverified | AAA | GGA | AAT | 1 | G | A |
| TCGA-29-1761 | TTN_ENST0C | ENST00000342175 | p.V19493I | c.58477G>A | Unverified | GAC | GTT | ATT | 1 | G | A |
| TCGA-61-2094 | TTN_ENST0C | ENST00000342175 | p.E17011K | c.51031G>A | Unverified | ATC | GAA | ATT | 1 | G | A |
| TCGA-09-1674 | TTN_ENST0C | ENST00000342175 | p.R6230Q  | c.18689G>A | Unverified | TGT | CGA | CTC | 2 | G | A |
| TCGA-09-1674 | TTN_ENST0C | ENST00000342992 | p.G21007S | c.63019G>A | Unverified | AAA | GGC | TCT | 1 | G | A |
| TCGA-29-1711 | TTN_ENST0C | ENST00000342992 | p.G1371R  | c.4111G>A  | Unverified | AAA | GGA | AAT | 1 | G | A |
| TCGA-29-1711 | TTN_ENST0C | ENST00000342992 | p.G1371R  | c.4111G>A  | Unverified | AAA | GGA | AAT | 1 | G | A |
| TCGA-29-1761 | TTN_ENST0C | ENST00000342992 | p.V25798I | c.77392G>A | Unverified | GAC | GTT | ATT | 1 | G | A |
| TCGA-61-1906 | TTN_ENST0C | ENST00000342992 | p.G3938R  | c.11812G>A | Unverified | GGA | GGA | CAA | 1 | G | A |
| TCGA-61-1906 | TTN_ENST0C | ENST00000342992 | p.G3938R  | c.11812G>A | Unverified | GGA | GGA | CAA | 1 | G | A |
| TCGA-61-1907 | TTN_ENST0C | ENST00000342992 | p.G7484S  | c.22450G>A | Unverified | GTT | GGT | TCC | 1 | G | A |
| TCGA-09-1674 | TTN_ENST0C | ENST00000342992 | p.R12535Q | c.37604G>A | Unverified | TGT | CGA | CTC | 2 | G | A |
| TCGA-09-1674 | TTN_ENST0C | ENST00000356127 | p.G21005S | c.63013G>A | Unverified | AAA | GGC | TCT | 1 | G | A |
| TCGA-29-1711 | TTN_ENST0C | ENST00000356127 | p.G1371R  | c.4111G>A  | Unverified | AAA | GGA | AAT | 1 | G | A |
| TCGA-29-1711 | TTN_ENST0C | ENST00000356127 | p.G1371R  | c.4111G>A  | Unverified | AAA | GGA | AAT | 1 | G | A |
| TCGA-29-1761 | TTN_ENST0C | ENST00000356127 | p.V25796I | c.77386G>A | Unverified | GAC | GTT | ATT | 1 | G | A |
| TCGA-29-2427 | TTN_ENST0C | ENST00000356127 | p.V911I   | c.2731G>A  | Verified   | ACC | GTC | CGT | 1 | G | A |
| TCGA-61-2012 | TTN_ENST0C | ENST00000356127 | p.A18280T | c.54838G>A | Verified   | ACG | GCT | GGC | 1 | G | A |
| TCGA-13-0885 | TTN_ENST0C | ENST00000356127 | p.E29896K | c.89686G>A | Verified   | ACC | GAA | GGA | 1 | G | A |
| TCGA-61-2094 | TTN_ENST0C | ENST00000356127 | p.E23314K | c.69940G>A | Unverified | ATC | GAA | ATT | 1 | G | A |
| TCGA-09-1674 | TTN_ENST0C | ENST00000356127 | p.R12535Q | c.37604G>A | Unverified | TGT | CGA | CTC | 2 | G | A |
| TCGA-13-1496 | TTN_ENST0C | ENST00000356127 | p.R6745H  | c.20234G>A | Verified   | ATC | CGC | AAG | 2 | G | A |
| TCGA-61-2095 | TTN_ENST0C | ENST00000356127 | p.Q23538Q | c.70614G>A | Verified   | TTA | CAG | TGG | 3 | G | A |
| TCGA-09-1674 | TTN_ENST0C | ENST00000359218 | p.G14635S | c.43903G>A | Unverified | AAA | GGC | TCT | 1 | G | A |
| TCGA-29-1711 | TTN_ENST0C | ENST00000359218 | p.G1325R  | c.3973G>A  | Unverified | AAA | GGA | AAT | 1 | G | A |
| TCGA-29-1711 | TTN_ENST0C | ENST00000359218 | p.G1325R  | c.3973G>A  | Unverified | AAA | GGA | AAT | 1 | G | A |
| TCGA-29-1761 | TTN_ENST0C | ENST00000359218 | p.V19426I | c.58276G>A | Unverified | GAC | GTT | ATT | 1 | G | A |
| TCGA-09-1674 | TTN_ENST0C | ENST00000359218 | p.R6163Q  | c.18488G>A | Unverified | TGT | CGA | CTC | 2 | G | A |
| TCGA-29-1711 | TTN_ENST0C | ENST00000360870 | p.G1371R  | c.4111G>A  | Unverified | AAA | GGA | AAT | 1 | G | A |
| TCGA-29-1711 | TTN_ENST0C | ENST00000360870 | p.G1371R  | c.4111G>A  | Unverified | AAA | GGA | AAT | 1 | G | A |

|              |                      |                 |          |            |            |     |     |     |   |   |   |
|--------------|----------------------|-----------------|----------|------------|------------|-----|-----|-----|---|---|---|
| TCGA-29-2427 | TTN_ENST00000360870  | ENST00000360870 | p.V911I  | c.2731G>A  | Verified   | ACC | GTC | CGT | 1 | G | A |
| TCGA-04-1542 | TTN_ENST00000360870  | ENST00000360870 | p.K3761K | c.11283G>A | Verified   | TAT | AAG | GTA | 3 | G | A |
| TCGA-29-1763 | TPPA                 | ENST00000260116 | p.V126I  | c.376G>A   | Unverified | AAA | GTT | TTT | 1 | G | A |
| TCGA-24-1464 | TUBA4A               | ENST00000248437 | p.R79Q   | c.236G>A   | Verified   | ATC | CGA | AAT | 2 | G | A |
| TCGA-24-1464 | TUBA4A_EN            | ENST00000392088 | p.R64Q   | c.191G>A   | Verified   | ATC | CGA | AAT | 2 | G | A |
| TCGA-23-1117 | TUBB3                | ENST00000315491 | p.G71R   | c.211G>A   | Verified   | CCC | GGA | ACC | 1 | G | A |
| TCGA-23-1117 | TUBB3                | ENST00000315491 | p.G71R   | c.211G>A   | Verified   | CCC | GGA | ACC | 1 | G | A |
| TCGA-25-2398 | TUBB4                | ENST00000264071 | p.E405K  | c.1213G>A  | Verified   | GAC | GAG | ATG | 1 | G | A |
| TCGA-29-1770 | TUBB8                | ENST00000328974 | p.R276Q  | c.827G>A   | Unverified | AGC | CGG | GGC | 2 | G | A |
| TCGA-61-1738 | TULP4                | ENST00000367097 | p.A1057T | c.3169G>A  | Unverified | ACC | GCC | AGC | 1 | G | A |
| TCGA-61-1738 | TULP4                | ENST00000367097 | p.A1057T | c.3169G>A  | Unverified | ACC | GCC | AGC | 1 | G | A |
| TCGA-29-1761 | TYK2                 | ENST00000525621 | p.S973S  | c.2919G>A  | Unverified | AAG | TCG | CTG | 3 | G | A |
| TCGA-61-1740 | TYW3                 | ENST00000370867 | p.R228H  | c.683G>A   | Unverified | ACA | CGT | GCC | 2 | G | A |
| TCGA-20-0990 | UBA3                 | ENST00000361055 | p.C249Y  | c.746G>A   | Verified   | cac | tgt | att | 2 | G | A |
| TCGA-29-1693 | UBA52                | ENST00000442744 | p.R54H   | c.161G>A   | Unverified | GGC | CGC | ACT | 2 | G | A |
| TCGA-23-1111 | UBA7                 | ENST00000333486 | p.R204H  | c.611G>A   | Unverified | ttc | cgt | gat | 2 | G | A |
| TCGA-13-0920 | UBAP2                | ENST00000379238 | p.V344I  | c.1030G>A  | Verified   | GCC | GTC | AAC | 1 | G | A |
| TCGA-24-1470 | UBASH3A              | ENST00000319294 | p.P332P  | c.996G>A   | Verified   | CTG | CCG | GAA | 3 | G | A |
| TCGA-24-1435 | UBC                  | ENST00000339647 | p.D52N   | c.154G>A   | Verified   | GAA | GAT | GGG | 1 | G | A |
| TCGA-61-1907 | UBE2D3               | ENST00000357194 | p.R17H   | c.50G>A    | Unverified | gcc | cgt | gac | 2 | G | A |
| TCGA-61-1907 | UBE2D3_EN            | ENST00000343106 | p.R15H   | c.44G>A    | Unverified | GCC | CGT | GAC | 2 | G | A |
| TCGA-20-1686 | UBE2Q1               | ENST00000292211 | p.G359D  | c.1076G>A  | Unverified | cag | ggc | tgg | 2 | G | A |
| TCGA-04-1361 | UBE3C                | ENST00000348165 | p.E836E  | c.2508G>A  | Verified   | gtg | gag | ctg | 3 | G | A |
| TCGA-04-1361 | UBE3C                | ENST00000348165 | p.E836E  | c.2508G>A  | Verified   | gtg | gag | ctg | 3 | G | A |
| TCGA-13-0900 | UBLCP1               | ENST00000296786 | p.V234I  | c.700G>A   | Verified   | GGT | GTT | ATA | 1 | G | A |
| TCGA-23-1809 | UBN2                 | ENST00000288561 | p.M1034I | c.3102G>A  | Unverified | GGA | ATG | AAC | 3 | G | A |
| TCGA-29-2427 | UBOX5                | ENST00000217173 | p.L217L  | c.651G>A   | Verified   | aac | ctg | cct | 3 | G | A |
| TCGA-23-1029 | UBR3                 | ENST00000392632 | p.G172R  | c.514G>A   | Unverified | GAA | GGA | GGT | 1 | G | A |
| TCGA-23-1029 | UBR3_ENST00000418381 | ENST00000418381 | p.G1319R | c.3955G>A  | Unverified | GAA | GGA | GGT | 1 | G | A |
| TCGA-13-0920 | UBR4                 | ENST00000375254 | p.T3554T | c.10662G>A | Verified   | GAC | ACG | CGG | 3 | G | A |
| TCGA-61-1738 | UBR5                 | ENST00000520539 | p.V2687M | c.8059G>A  | Unverified | aat | gtg | caa | 1 | G | A |
| TCGA-61-1738 | UBR5                 | ENST00000520539 | p.V2687M | c.8059G>A  | Unverified | aat | gtg | caa | 1 | G | A |
| TCGA-13-0807 | UBXN10               | ENST00000375099 | p.E13E   | c.39G>A    | Verified   | CCT | GAG | TGT | 3 | G | A |
| TCGA-09-2050 | UBXN2B               | ENST00000399598 | p.D252N  | c.754G>A   | Verified   | GAT | GAT | TCA | 1 | G | A |

|              |           |                 |          |            |            |     |     |     |   |   |   |
|--------------|-----------|-----------------|----------|------------|------------|-----|-----|-----|---|---|---|
| TCGA-30-1718 | UBXN6     | ENST00000301281 | p.E51K   | c.151G>A   | Unverified | AAT | GAG | GCA | 1 | G | A |
| TCGA-24-1469 | UGCG      | ENST00000374279 | p.A242A  | c.726G>A   | Verified   | AAA | GCG | ATA | 3 | G | A |
| TCGA-24-1845 | UGGT1     | ENST00000259253 | p.V590I  | c.1768G>A  | Unverified | GTG | GTC | AGT | 1 | G | A |
| TCGA-29-1703 | UGGT2     | ENST00000376747 | p.A1493T | c.4477G>A  | Unverified | GAT | GCT | GAG | 1 | G | A |
| TCGA-23-1021 | UGT1A9    | ENST00000354728 | p.E178K  | c.532G>A   | Verified   | ctt | gaa | gaa | 1 | G | A |
| TCGA-29-1699 | UGT2B28   | ENST00000335568 | p.V508I  | c.1522G>A  | Unverified | GTC | GTC | ACA | 1 | G | A |
| TCGA-23-1117 | UIMC1     | ENST00000377227 | p.R122Q  | c.365G>A   | Verified   | TGC | CGG | CCT | 2 | G | A |
| TCGA-23-1117 | UIMC1     | ENST00000377227 | p.R122Q  | c.365G>A   | Verified   | TGC | CGG | CCT | 2 | G | A |
| TCGA-13-0924 | UNC13A    | ENST00000428389 | p.A125T  | c.373G>A   | Verified   | ATC | GCG | GTG | 1 | G | A |
| TCGA-13-0795 | UNC13A    | ENST00000428389 | p.M1183I | c.3549G>A  | Verified   | GAC | ATG | AAG | 3 | G | A |
| TCGA-13-0760 | UNC13B    | ENST00000378495 | p.V1514M | c.4540G>A  | Verified   | TGC | GTG | AAG | 1 | G | A |
| TCGA-20-1687 | UNC13C    | ENST00000260323 | p.Q1020Q | c.3060G>A  | Unverified | CTC | CAG | GTG | 3 | G | A |
| TCGA-20-1687 | UNC13C_EN | ENST00000260323 | p.Q1020Q | c.3060G>A  | Unverified | CTC | CAG | GTG | 3 | G | A |
| TCGA-30-1891 | UNC5B     | ENST00000335350 | p.G287D  | c.860G>A   | Unverified | GAG | GGC | CAG | 2 | G | A |
| TCGA-29-1766 | UNC5C     | ENST00000453304 | p.V356I  | c.1066G>A  | Unverified | CTC | GTC | TTG | 1 | G | A |
| TCGA-25-2392 | UNC80     | ENST00000281753 | p.R253Q  | c.758G>A   | Unverified | AGC | CGG | ACC | 2 | G | A |
| TCGA-23-1122 | UNQ1887   | ENST00000353487 | p.A338T  | c.1012G>A  | Verified   | CGG | GCC | GCC | 1 | G | A |
| TCGA-25-1313 | URB2      | ENST00000258243 | p.G955R  | c.2863G>A  | Verified   | AAG | GGG | AAA | 1 | G | A |
| TCGA-24-1422 | URGCP     | ENST00000223341 | p.V95M   | c.283G>A   | Verified   | GAC | GTG | CTC | 1 | G | A |
| TCGA-24-0979 | URGCP     | ENST00000223341 | p.G349G  | c.1047G>A  | Verified   | CGT | GGG | AAG | 3 | G | A |
| TCGA-29-1693 | UROC1     | ENST00000290868 | p.E302K  | c.904G>A   | Unverified | AGG | GAA | GCA | 1 | G | A |
| TCGA-29-1693 | UROC1_ENS | ENST00000383579 | p.E362K  | c.1084G>A  | Unverified | AGG | GAA | GCA | 1 | G | A |
| TCGA-24-1843 | UROD      | ENST00000246337 | p.V321M  | c.961G>A   | Unverified | TTG | GTG | AAG | 1 | G | A |
| TCGA-23-1022 | USH2A     | ENST00000307340 | p.G1911R | c.5731G>A  | Verified   | CAG | GGA | AAA | 1 | G | A |
| TCGA-13-1501 | USH2A     | ENST00000307340 | p.S1088N | c.3263G>A  | Verified   | TAC | AGT | TTA | 2 | G | A |
| TCGA-13-1501 | USH2A     | ENST00000307340 | p.S1088N | c.3263G>A  | Verified   | TAC | AGT | TTA | 2 | G | A |
| TCGA-23-1111 | USH2A     | ENST00000307340 | p.R1578H | c.4733G>A  | Unverified | GGA | CGT | CTT | 2 | G | A |
| TCGA-23-1809 | USH2A     | ENST00000307340 | p.R4120H | c.12359G>A | Unverified | TTC | CGC | CGC | 2 | G | A |
| TCGA-09-2056 | USH2A     | ENST00000307340 | p.R4302R | c.12906G>A | Verified   | CAA | AGG | AAT | 3 | G | A |
| TCGA-13-0755 | USHBP1    | ENST00000252597 | p.R431H  | c.1292G>A  | Verified   | CAG | CGT | CTC | 2 | G | A |
| TCGA-23-1110 | USHBP1    | ENST00000252597 | p.Q539Q  | c.1617G>A  | Unverified | CTC | CAG | GCT | 3 | G | A |
| TCGA-13-1498 | USP11     | ENST00000218348 | p.V455M  | c.1363G>A  | Verified   | atc | gtg | gac | 1 | G | A |
| TCGA-04-1638 | USP13     | ENST00000263966 | p.G13S   | c.37G>A    | Unverified | GGC | GGC | AGC | 1 | G | A |
| TCGA-25-2042 | USP17L2   | ENST00000333796 | p.D332N  | c.994G>A   | Unverified | CAC | GAC | GGA | 1 | G | A |



|              |            |                 |          |           |            |     |     |     |   |   |   |
|--------------|------------|-----------------|----------|-----------|------------|-----|-----|-----|---|---|---|
| TCGA-23-1021 | USP19      | XM_496642.1     | p.G1144S | c.3430G>A | Verified   | gcc | ggc | cac | 1 | G | A |
| TCGA-13-1488 | USP19      | XM_496642.1     | p.E514E  | c.1542G>A | Verified   | gtg | gag | aag | 3 | G | A |
| TCGA-29-1770 | USP2       | ENST00000260187 | p.G109R  | c.325G>A  | Unverified | AGC | GGG | GGC | 1 | G | A |
| TCGA-29-1776 | USP20      | ENST00000372429 | p.A502T  | c.1504G>A | Unverified | GGC | GCC | TGT | 1 | G | A |
| TCGA-29-1776 | USP20_ENST | ENST00000315480 | p.A502T  | c.1504G>A | Unverified | GGC | GCC | TGT | 1 | G | A |
| TCGA-29-1776 | USP20_ENST | ENST00000372429 | p.A502T  | c.1504G>A | Unverified | GGC | GCC | TGT | 1 | G | A |
| TCGA-04-1651 | USP28      | ENST00000003302 | p.W888*  | c.2663G>A | Unverified | AAG | TGG | CAT | 2 | G | A |
| TCGA-04-1651 | USP28      | ENST00000003302 | p.W888*  | c.2663G>A | Unverified | AAG | TGG | CAT | 2 | G | A |
| TCGA-61-1900 | USP29      | ENST00000254181 | p.G352G  | c.1056G>A | Unverified | ctt | ggg | aat | 3 | G | A |
| TCGA-30-1891 | USP31      | ENST00000219689 | p.A857T  | c.2569G>A | Unverified | TTG | GCC | GTC | 1 | G | A |
| TCGA-04-1343 | USP31      | ENST00000219689 | p.E1098E | c.3294G>A | Verified   | AAG | GAG | TCA | 3 | G | A |
| TCGA-29-1691 | USP37      | ENST00000258399 | p.R976H  | c.2927G>A | Unverified | ACC | CGT | CAG | 2 | G | A |
| TCGA-09-2050 | USP37      | ENST00000258399 | p.E874E  | c.2622G>A | Verified   | GCT | GAG | GAA | 3 | G | A |
| TCGA-04-1338 | USP47      | ENST00000339865 | p.V781V  | c.2343G>A | Verified   | TCT | GTG | GAA | 3 | G | A |
| TCGA-29-1784 | USP49      | ENST00000373006 | p.G614E  | c.1841G>A | Unverified | TCA | GGA | CAC | 2 | G | A |
| TCGA-04-1347 | USP51      | ENST00000500968 | p.V643V  | c.1929G>A | Verified   | tgt | gtg | ccc | 3 | G | A |
| TCGA-13-0906 | USP54      | NM_152586.2     | p.E48K   | c.142G>A  | Unverified | gtt | gaa | gta | 1 | G | A |
| TCGA-13-0906 | USP54_ENST | ENST00000408019 | p.E960K  | c.2878G>A | Unverified | GTT | GAA | GTA | 1 | G | A |
| TCGA-13-1408 | USP6       | NM_004505.1     | p.V148V  | c.444G>A  | Unverified | gac | gtg | agg | 3 | G | A |
| TCGA-13-1408 | USP6_ENST  | ENST00000250066 | p.V148V  | c.444G>A  | Unverified | GAC | GTG | AGG | 3 | G | A |
| TCGA-20-1685 | USPL1      | ENST00000255304 | p.C97Y   | c.290G>A  | Unverified | GAA | TGT | CAC | 2 | G | A |
| TCGA-61-1899 | VAC14      | ENST00000261776 | p.E258K  | c.772G>A  | Unverified | gct | gag | atg | 1 | G | A |
| TCGA-24-1464 | VAR52      | ENST00000321897 | p.V828M  | c.2482G>A | Verified   | CCC | GTG | CTG | 1 | G | A |
| TCGA-04-1638 | VAT1L      | ENST00000302536 | p.E410K  | c.1228G>A | Unverified | AGC | GAG | AAC | 1 | G | A |
| TCGA-29-1696 | VCAM1      | ENST00000294728 | p.W258*  | c.774G>A  | Unverified | TTC | TGG | AGT | 3 | G | A |
| TCGA-29-1696 | VCAM1      | ENST00000294728 | p.W258*  | c.774G>A  | Unverified | TTC | TGG | AGT | 3 | G | A |
| TCGA-61-2012 | VCAN       | ENST00000265077 | p.V2685I | c.8053G>A | Verified   | GAC | GTT | TTA | 1 | G | A |
| TCGA-61-2094 | VIL1       | ENST00000248444 | p.Q290Q  | c.870G>A  | Unverified | GAC | CAG | GGG | 3 | G | A |
| TCGA-09-2049 | VNN1       | ENST00000367928 | p.G477G  | c.1431G>A | Verified   | TTT | GGG | AGG | 3 | G | A |
| TCGA-13-0885 | VPS11      | ENST00000300793 | p.G565E  | c.1694G>A | Verified   | AAG | GGA | CTT | 2 | G | A |
| TCGA-23-1118 | VPS18      | ENST00000220509 | p.A686T  | c.2056G>A | Verified   | CAG | GCT | GGG | 1 | G | A |
| TCGA-04-1338 | VPS52      | ENST00000445902 | p.S657N  | c.1970G>A | Verified   | CTG | AGT | CAG | 2 | G | A |
| TCGA-61-1910 | VRK3       | ENST00000316763 | p.E150K  | c.448G>A  | Unverified | ctt | gaa | gct | 1 | G | A |
| TCGA-24-2289 | VRTN       | ENST00000256362 | p.L113L  | c.339G>A  | Unverified | ATG | CTG | CTG | 3 | G | A |

|              |           |                 |          |             |            |     |     |     |   |   |   |
|--------------|-----------|-----------------|----------|-------------|------------|-----|-----|-----|---|---|---|
| TCGA-23-1118 | VSX2      | ENST00000261980 | p.E169K  | c.505G>A    | Verified   | AAC | GAA | GCC | 1 | G | A |
| TCGA-20-1686 | WAS       | ENST00000376701 | p.V141M  | c.421G>A    | Unverified | ctc | gtg | cag | 1 | G | A |
| TCGA-29-1701 | WASF2     | ENST00000430629 | p.T5T    | c.15G>A     | Unverified | gta | acg | agg | 3 | G | A |
| TCGA-04-1530 | WBP2NL    | ENST00000329620 | p.A254T  | c.760G>A    | Unverified | GGA | GCC | CCA | 1 | G | A |
| TCGA-29-1693 | WDFY2     | ENST00000298125 | p.R329H  | c.986G>A    | Unverified | AAG | CGC | TCC | 2 | G | A |
| TCGA-13-0791 | WDR13     | ENST00000376729 | p.G150R  | c.448G>A    | Verified   | GCC | GGG | GAC | 1 | G | A |
| TCGA-23-1114 | WDR13     | ENST00000376729 | p.R19H   | c.56G>A     | Unverified | TAC | CGC | ACA | 2 | G | A |
| TCGA-23-1114 | WDR13_ENS | ENST00000218056 | p.R19H   | c.56G>A     | Unverified | TAC | CGC | ACA | 2 | G | A |
| TCGA-24-1843 | WDR16     | ENST00000352665 | p.Q451Q  | c.1353G>A   | Unverified | ACC | CAG | AAG | 3 | G | A |
| TCGA-13-1509 | WDR24     | ENST00000293883 | p.T122T  | c.366G>A    | Verified   | CGC | ACG | GTA | 3 | G | A |
| TCGA-29-1691 | WDR3      | ENST00000349139 | p.D319N  | c.955G>A    | Unverified | ATG | GAT | AAG | 1 | G | A |
| TCGA-13-0924 | WDR35     | ENST00000345530 | p.R472Q  | c.1415G>A   | Verified   | TCT | CGA | AAA | 2 | G | A |
| TCGA-29-1699 | WDR37     | ENST00000358220 | p.?      | c.1239-1G>A | Unverified | AAC | AGG | ATC | 3 | G | A |
| TCGA-13-0893 | WDR48     | ENST00000302313 | p.R13R   | c.39G>A     | Verified   | CGG | AGG | AAA | 3 | G | A |
| TCGA-61-1895 | WDR61     | ENST00000267973 | p.?      | c.829-1G>A  | Unverified | CAG | GTC | TGG | 1 | G | A |
| TCGA-29-1691 | WDR63     | ENST00000294664 | p.D399N  | c.1195G>A   | Unverified | GAT | GAC | ATC | 1 | G | A |
| TCGA-29-1785 | WDR64     | ENST00000341258 | p.G385R  | c.1153G>A   | Unverified | GCT | GGA | ACC | 1 | G | A |
| TCGA-29-1785 | WDR64     | ENST00000341258 | p.G385R  | c.1153G>A   | Unverified | GCT | GGA | ACC | 1 | G | A |
| TCGA-29-1785 | WDR64_ENS | ENST00000366552 | p.G665R  | c.1993G>A   | Unverified | GCT | GGA | ACC | 1 | G | A |
| TCGA-29-1785 | WDR64_ENS | ENST00000366552 | p.G665R  | c.1993G>A   | Unverified | GCT | GGA | ACC | 1 | G | A |
| TCGA-23-2078 | WDR7      | ENST00000254442 | p.?      | c.863+1G>A  | Unverified | GCC | AGT | TGC | 2 | G | A |
| TCGA-30-1718 | WDR75     | ENST00000314761 | p.R276H  | c.827G>A    | Unverified | TGG | CGC | GAT | 2 | G | A |
| TCGA-13-0795 | WDR93     | ENST00000268130 | p.G316R  | c.946G>A    | Verified   | TCC | GGG | CAG | 1 | G | A |
| TCGA-23-1124 | WDR96     | ENST00000357060 | p.G492R  | c.1474G>A   | Verified   | GTT | GGA | ACA | 1 | G | A |
| TCGA-25-2393 | WDR96     | ENST00000357060 | p.V70I   | c.208G>A    | Verified   | GGC | GTC | ATG | 1 | G | A |
| TCGA-23-1022 | WDTC1     | ENST00000361771 | p.D663N  | c.1987G>A   | Verified   | GAT | GAT | GAG | 1 | G | A |
| TCGA-24-2280 | WHSC1     | ENST00000382891 | p.E339E  | c.1017G>A   | Unverified | GAG | GAG | CGG | 3 | G | A |
| TCGA-20-0990 | WNT9A     | ENST00000272164 | p.A264T  | c.790G>A    | Unverified | GAG | GCA | GGT | 1 | G | A |
| TCGA-23-1124 | WWC1      | ENST00000265293 | p.Q1062Q | c.3186G>A   | Verified   | CTT | CAG | ACA | 3 | G | A |
| TCGA-09-2050 | WWC3      | NM_015691.2     | p.V184I  | c.550G>A    | Verified   | tcc | gtt | acc | 1 | G | A |
| TCGA-04-1652 | XCR1      | ENST00000309285 | p.A33T   | c.97G>A     | Unverified | CTC | GCC | ACC | 1 | G | A |
| TCGA-04-1652 | XCR1      | ENST00000309285 | p.A33T   | c.97G>A     | Unverified | CTC | GCC | ACC | 1 | G | A |
| TCGA-13-1510 | XPOT      | ENST00000332707 | p.A654T  | c.1960G>A   | Unverified | cat | gct | gtt | 1 | G | A |
| TCGA-29-1784 | XRN2      | ENST00000377191 | p.S499N  | c.1496G>A   | Unverified | GAC | AGT | GAC | 2 | G | A |

|              |            |                 |          |           |            |     |     |     |   |   |   |
|--------------|------------|-----------------|----------|-----------|------------|-----|-----|-----|---|---|---|
| TCGA-13-0883 | XYLT1      | ENST00000261381 | p.D413N  | c.1237G>A | Verified   | ACC | GAC | TGG | 1 | G | A |
| TCGA-13-0886 | YLPM1      | ENST00000238571 | p.S851N  | c.2552G>A | Verified   | ATC | AGT | CGA | 2 | G | A |
| TCGA-13-0920 | YTHDF1     | ENST00000370339 | p.V200I  | c.598G>A  | Verified   | GCC | GTC | AAG | 1 | G | A |
| TCGA-30-1891 | ZBTB10     | ENST00000455036 | p.W686*  | c.2057G>A | Unverified | ACC | TGG | GAA | 2 | G | A |
| TCGA-61-1907 | ZBTB25     | ENST00000394715 | p.A111T  | c.331G>A  | Unverified | ATT | GCA | ACT | 1 | G | A |
| TCGA-23-1809 | ZBTB3      | ENST00000394807 | p.L453L  | c.1359G>A | Unverified | TAC | CTG | TCT | 3 | G | A |
| TCGA-13-0885 | ZBTB38     | ENST00000514251 | p.G652D  | c.1955G>A | Verified   | GAG | GGT | ACC | 2 | G | A |
| TCGA-25-2400 | ZBTB48     | ENST00000377674 | p.M397I  | c.1191G>A | Unverified | CAC | ATG | ATC | 3 | G | A |
| TCGA-23-1032 | ZBTB7B     | ENST00000292176 | p.D155N  | c.463G>A  | Unverified | GAT | GAC | TGT | 1 | G | A |
| TCGA-13-0905 | ZC3H12A    | ENST00000373082 | p.S555N  | c.1664G>A | Verified   | GCC | AGC | GTG | 2 | G | A |
| TCGA-24-1844 | ZC3H13     | ENST00000282007 | p.R361Q  | c.1082G>A | Unverified | CAG | CGG | ACA | 2 | G | A |
| TCGA-61-1906 | ZC3H14     | ENST00000251038 | p.R505Q  | c.1514G>A | Unverified | ACA | CGA | GAT | 2 | G | A |
| TCGA-61-1906 | ZC3H14     | ENST00000251038 | p.R505Q  | c.1514G>A | Unverified | ACA | CGA | GAT | 2 | G | A |
| TCGA-24-1431 | ZC3H4      | ENST00000253048 | p.A1156T | c.3466G>A | Unverified | AAC | GCG | GGG | 1 | G | A |
| TCGA-13-0924 | ZC3H6      | ENST00000409871 | p.E283K  | c.847G>A  | Verified   | CTG | GAA | GGG | 1 | G | A |
| TCGA-04-1362 | ZCCHC12    | ENST00000310164 | p.V149V  | c.447G>A  | Verified   | tat | gtg | atc | 3 | G | A |
| TCGA-23-1021 | ZDBF2      | ENST00000374423 | p.E888K  | c.2662G>A | Verified   | CCC | GAA | GTA | 1 | G | A |
| TCGA-24-2280 | ZDHHC12    | ENST00000372663 | p.W22*   | c.65G>A   | Unverified | ACC | TGG | GGA | 2 | G | A |
| TCGA-04-1331 | ZDHHC15    | ENST00000373367 | p.V40I   | c.118G>A  | Verified   | tac | gtc | ttt | 1 | G | A |
| TCGA-13-0906 | ZEB2       | ENST00000303660 | p.R779K  | c.2336G>A | Verified   | tcc | agg | agt | 2 | G | A |
| TCGA-13-1499 | ZFP106     | ENST00000263805 | p.E627K  | c.1879G>A | Verified   | GAG | GAG | GAT | 1 | G | A |
| TCGA-23-1022 | ZFP37      | ENST00000374227 | p.R20K   | c.59G>A   | Verified   | AGG | AGA | AGT | 2 | G | A |
| TCGA-24-1846 | ZFP41      | ENST00000330701 | p.R94Q   | c.281G>A  | Unverified | GGG | CGG | ATC | 2 | G | A |
| TCGA-04-1638 | ZFYVE1     | ENST00000556143 | p.V692M  | c.2074G>A | Unverified | GCC | GTG | GTG | 1 | G | A |
| TCGA-29-1705 | ZHX2       | ENST00000314393 | p.R561Q  | c.1682G>A | Unverified | gat | cgg | cta | 2 | G | A |
| TCGA-61-1737 | ZIC5       | ENST00000267294 | p.A631T  | c.1891G>A | Unverified | GGG | GCC | CCC | 1 | G | A |
| TCGA-04-1337 | ZIM2_ENSTC | ENST00000423103 | p.R598H  | c.1793G>A | Unverified | GAA | CGT | GAA | 2 | G | A |
| TCGA-23-1118 | ZKSCAN1    | ENST00000324306 | p.R193Q  | c.578G>A  | Verified   | TCA | CGA | GCT | 2 | G | A |
| TCGA-24-1563 | ZKSCAN2    | ENST00000328086 | p.K506K  | c.1518G>A | Verified   | ACC | AAG | ACT | 3 | G | A |
| TCGA-24-2289 | ZMAT1      | NM_032441.1     | p.R425Q  | c.1274G>A | Verified   | cat | cga | aaa | 2 | G | A |
| TCGA-13-0714 | ZMYM2      | ENST00000456228 | p.V1028I | c.3082G>A | Verified   | CCT | GTT | TTT | 1 | G | A |
| TCGA-24-1422 | ZMYM4      | ENST00000314607 | p.D717N  | c.2149G>A | Verified   | TCT | GAT | GAA | 1 | G | A |
| TCGA-24-1435 | ZMYND17    | ENST00000372912 | p.P225P  | c.675G>A  | Verified   | GAC | CCG | GAT | 3 | G | A |
| TCGA-29-1777 | ZMYND8     | ENST00000461685 | p.A504T  | c.1510G>A | Unverified | caa | gca | ggg | 1 | G | A |

|              |            |                 |          |           |            |     |     |     |   |   |   |
|--------------|------------|-----------------|----------|-----------|------------|-----|-----|-----|---|---|---|
| TCGA-24-1846 | ZNF182     | ENST00000396965 | p.P85P   | c.255G>A  | Unverified | tgc | ccg | gca | 3 | G | A |
| TCGA-24-1846 | ZNF182_ENS | ENST00000376943 | p.P66P   | c.198G>A  | Unverified | TGC | CCG | GCA | 3 | G | A |
| TCGA-25-2398 | ZNF212     | ENST00000335870 | p.L484L  | c.1452G>A | Verified   | GGG | CTG | GCC | 3 | G | A |
| TCGA-25-2401 | ZNF236     | ENST00000253159 | p.V1315I | c.3943G>A | Verified   | TCT | GTT | CTA | 1 | G | A |
| TCGA-13-1499 | ZNF236     | ENST00000253159 | p.G90G   | c.270G>A  | Verified   | AGC | GGG | GAA | 3 | G | A |
| TCGA-13-1512 | ZNF238     | ENST00000358704 | p.V273M  | c.817G>A  | Verified   | GAC | GTG | CTG | 1 | G | A |
| TCGA-13-0924 | ZNF264     | ENST00000263095 | p.D87N   | c.259G>A  | Verified   | GGC | GAC | AAA | 1 | G | A |
| TCGA-13-0916 | ZNF266     | ENST00000361151 | p.E300K  | c.898G>A  | Verified   | AAG | GAA | TGT | 1 | G | A |
| TCGA-09-2049 | ZNF280A    | ENST00000302097 | p.M101I  | c.303G>A  | Verified   | ATC | ATG | CCC | 3 | G | A |
| TCGA-61-2113 | ZNF280B    | ENST00000360412 | p.E370E  | c.1110G>A | Verified   | CAG | GAG | CCC | 3 | G | A |
| TCGA-13-0893 | ZNF280D    | ENST00000267807 | p.E378K  | c.1132G>A | Verified   | ATC | GAA | AGT | 1 | G | A |
| TCGA-23-1114 | ZNF282     | ENST00000262085 | p.M61I   | c.183G>A  | Unverified | GAC | ATG | GAC | 3 | G | A |
| TCGA-29-1705 | ZNF283_ENS | ENST00000324461 | p.G577G  | c.1731G>A | Unverified | TGT | GGG | AAG | 3 | G | A |
| TCGA-29-1705 | ZNF295     | ENST00000398499 | p.M917I  | c.2751G>A | Unverified | AAG | ATG | TTC | 3 | G | A |
| TCGA-24-2267 | ZNF318     | ENST00000361428 | p.D1611N | c.4831G>A | Verified   | TCA | GAC | ACC | 1 | G | A |
| TCGA-24-2262 | ZNF335     | ENST00000322927 | p.R443R  | c.1329G>A | Unverified | TCC | AGG | CGC | 3 | G | A |
| TCGA-24-1469 | ZNF345     | ENST00000420450 | p.G86S   | c.256G>A  | Verified   | ACT | GGT | GAG | 1 | G | A |
| TCGA-23-2078 | ZNF35      | ENST00000396056 | p.G480G  | c.1440G>A | Unverified | TGT | GGG | AAG | 3 | G | A |
| TCGA-24-1435 | ZNF354B    | ENST00000322434 | p.C216Y  | c.647G>A  | Verified   | AAA | TGC | AGT | 2 | G | A |
| TCGA-61-2102 | ZNF383     | ENST00000352998 | p.M66I   | c.198G>A  | Verified   | TGG | ATG | GTT | 3 | G | A |
| TCGA-24-1417 | ZNF425     | ENST00000378061 | p.C315Y  | c.944G>A  | Unverified | CAG | TGC | GAG | 2 | G | A |
| TCGA-24-1563 | ZNF429     | ENST00000358491 | p.C539Y  | c.1616G>A | Verified   | AAA | TGT | GAA | 2 | G | A |
| TCGA-29-1691 | ZNF434     | ENST00000304926 | p.G368E  | c.1103G>A | Unverified | TGT | GGG | CAA | 2 | G | A |
| TCGA-13-1481 | ZNF462     | ENST00000277225 | p.A1171T | c.3511G>A | Verified   | CCC | GCC | CCC | 1 | G | A |
| TCGA-13-0886 | ZNF471     | ENST00000308031 | p.E540E  | c.1620G>A | Verified   | GGA | GAG | AAA | 3 | G | A |
| TCGA-29-1761 | ZNF473     | ENST00000391821 | p.E166K  | c.496G>A  | Unverified | GGA | GAA | GAT | 1 | G | A |
| TCGA-20-0990 | ZNF479     | ENST00000331162 | p.E29K   | c.85G>A   | Verified   | GAG | GAA | TGG | 1 | G | A |
| TCGA-29-1702 | ZNF479     | ENST00000331162 | p.Q101Q  | c.303G>A  | Unverified | GAG | CAG | GGC | 3 | G | A |
| TCGA-23-1116 | ZNF488     | ENST00000395702 | p.R334Q  | c.1001G>A | Unverified | TCC | CGG | CAC | 2 | G | A |
| TCGA-04-1655 | ZNF492_ENS | ENST00000456783 | p.C482Y  | c.1445G>A | Unverified | GAA | TGT | GGC | 2 | G | A |
| TCGA-09-1665 | ZNF500     | ENST00000219478 | p.D364N  | c.1090G>A | Verified   | AGC | GAC | CGC | 1 | G | A |
| TCGA-29-1785 | ZNF516     | ENST00000217537 | p.S181N  | c.542G>A  | Unverified | AAG | AGC | CAG | 2 | G | A |
| TCGA-29-1785 | ZNF516     | ENST00000217537 | p.S181N  | c.542G>A  | Unverified | AAG | AGC | CAG | 2 | G | A |
| TCGA-13-1512 | ZNF521     | NM_015461.1     | p.R967Q  | c.2900G>A | Verified   | gag | cgg | ttt | 2 | G | A |

|              |         |                 |         |           |            |     |     |     |   |   |   |
|--------------|---------|-----------------|---------|-----------|------------|-----|-----|-----|---|---|---|
| TCGA-29-1699 | ZNF528  | ENST00000360465 | p.R426Q | c.1277G>A | Unverified | ATA | CGA | CAT | 2 | G | A |
| TCGA-30-1855 | ZNF536  | ENST00000355537 | p.G637S | c.1909G>A | Unverified | TGC | GGC | CGG | 1 | G | A |
| TCGA-13-0883 | ZNF565  | ENST00000304116 | p.G285S | c.853G>A  | Verified   | TGT | GGC | AAG | 1 | G | A |
| TCGA-29-1703 | ZNF574  | ENST00000359044 | p.G737S | c.2209G>A | Unverified | CGG | GGT | CTA | 1 | G | A |
| TCGA-13-0755 | ZNF585A | ENST00000392157 | p.G463G | c.1389G>A | Verified   | ACT | GGG | GAG | 3 | G | A |
| TCGA-24-1844 | ZNF587  | ENST00000339656 | p.P6P   | c.18G>A   | Unverified | GTG | CCG | AGG | 3 | G | A |
| TCGA-23-1032 | ZNF608  | ENST00000306315 | p.R479Q | c.1436G>A | Unverified | GGA | CGA | AGG | 2 | G | A |
| TCGA-24-1435 | ZNF609  | ENST00000326648 | p.R124H | c.371G>A  | Verified   | GGG | CGC | TCA | 2 | G | A |
| TCGA-13-0913 | ZNF610  | ENST00000327920 | p.V308I | c.922G>A  | Verified   | CTT | GTA | ATC | 1 | G | A |
| TCGA-61-1725 | ZNF613  | ENST00000293471 | p.E593K | c.1777G>A | Unverified | GCA | GAG | AGC | 1 | G | A |
| TCGA-13-0755 | ZNF614  | ENST00000270649 | p.E162K | c.484G>A  | Verified   | GGT | GAG | AAA | 1 | G | A |
| TCGA-13-1488 | ZNF619  | ENST00000314686 | p.G112R | c.334G>A  | Verified   | GAG | GGA | CTG | 1 | G | A |
| TCGA-23-1118 | ZNF649  | ENST00000354957 | p.W19*  | c.56G>A   | Verified   | ACC | TGG | GAG | 2 | G | A |
| TCGA-04-1649 | ZNF653  | ENST00000293771 | p.T226T | c.678G>A  | Unverified | GCG | ACG | CCC | 3 | G | A |
| TCGA-61-1900 | ZNF669  | ENST00000343381 | p.G228R | c.682G>A  | Unverified | TGT | GGG | AAA | 1 | G | A |
| TCGA-23-2077 | ZNF670  | ENST00000366503 | p.E244K | c.730G>A  | Verified   | CAT | GAA | AGA | 1 | G | A |
| TCGA-13-1509 | ZNF687  | ENST00000324048 | p.E169K | c.505G>A  | Verified   | CCT | GAG | CCA | 1 | G | A |
| TCGA-23-1117 | ZNF691  | ENST00000372506 | p.E15K  | c.43G>A   | Verified   | CCT | GAG | GAA | 1 | G | A |
| TCGA-23-1117 | ZNF691  | ENST00000372506 | p.E15K  | c.43G>A   | Verified   | CCT | GAG | GAA | 1 | G | A |
| TCGA-23-1032 | ZNF697  | ENST00000421812 | p.T488T | c.1464G>A | Unverified | CAC | ACG | GGC | 3 | G | A |
| TCGA-13-0760 | ZNF697  | ENST00000421812 | p.P53P  | c.159G>A  | Verified   | CAT | CCG | GAG | 3 | G | A |
| TCGA-24-1417 | ZNF7    | ENST00000325241 | p.E52E  | c.156G>A  | Unverified | CCT | GAG | CTG | 3 | G | A |
| TCGA-29-1770 | ZNF74   | ENST00000400451 | p.G384S | c.1150G>A | Unverified | ACG | GGC | GAG | 1 | G | A |
| TCGA-24-1422 | ZNF74   | ENST00000400451 | p.G127D | c.380G>A  | Verified   | CAG | GGC | ATT | 2 | G | A |
| TCGA-61-1907 | ZNF750  | ENST00000269394 | p.C663Y | c.1988G>A | Unverified | GCC | TGC | CGG | 2 | G | A |
| TCGA-61-1737 | ZNF772  | ENST00000343280 | p.A10T  | c.28G>A   | Unverified | CCG | GCA | CAG | 1 | G | A |
| TCGA-61-1895 | ZNF790  | ENST00000356725 | p.V535I | c.1603G>A | Unverified | TAC | GTA | TGT | 1 | G | A |
| TCGA-29-1705 | ZNF80   | ENST00000308095 | p.V108V | c.324G>A  | Unverified | TGC | GTG | GAG | 3 | G | A |
| TCGA-09-1674 | ZNF804A | ENST00000302277 | p.E397K | c.1189G>A | Unverified | CCC | GAG | ACA | 1 | G | A |
| TCGA-29-1770 | ZP1     | ENST00000278853 | p.R504Q | c.1511G>A | Unverified | CAG | CGA | TTC | 2 | G | A |
| TCGA-20-1683 | ZP4     | ENST00000366570 | p.V85M  | c.253G>A  | Unverified | TCC | GTG | GTG | 1 | G | A |
| TCGA-61-1740 | ZPLD1   | ENST00000306176 | p.G393R | c.1177G>A | Unverified | TCA | GGA | ATG | 1 | G | A |
| TCGA-24-2289 | ZXDA    | ENST00000358697 | p.A392T | c.1174G>A | Unverified | tgc | gcg | ttt | 1 | G | A |
| TCGA-09-2049 | AARS    | ENST00000261772 | p.D261H | c.781G>C  | Unverified | ACT | GAC | CTT | 1 | G | C |

|              |           |                 |          |            |            |     |     |     |   |   |   |
|--------------|-----------|-----------------|----------|------------|------------|-----|-----|-----|---|---|---|
| TCGA-25-2392 | AASS      | ENST00000393376 | p.R294P  | c.881G>C   | Unverified | AGT | CGT | TTT | 2 | G | C |
| TCGA-24-1469 | ABCA12    | ENST00000272895 | p.R1095P | c.3284G>C  | Verified   | CTC | CGG | CTT | 2 | G | C |
| TCGA-24-1846 | ABCA13_EN | ENST00000435803 | p.D1093H | c.3277G>C  | Unverified | GAA | GAC | CTA | 1 | G | C |
| TCGA-30-1856 | ABCA8     | ENST00000269080 | p.G1470A | c.4409G>C  | Unverified | TTT | GGC | AAA | 2 | G | C |
| TCGA-25-2393 | ABCA9     | ENST00000340001 | p.L31F   | c.93G>C    | Verified   | ACC | TTG | TTG | 3 | G | C |
| TCGA-13-0887 | ABCC1     | ENST00000399410 | p.G700A  | c.2099G>C  | Verified   | GAG | GGG | CAC | 2 | G | C |
| TCGA-13-1408 | ABCC5     | ENST00000334444 | p.V1435L | c.4303G>C  | Verified   | GCT | GTC | AAG | 1 | G | C |
| TCGA-13-1481 | ABHD2     | ENST00000352732 | p.C234S  | c.701G>C   | Verified   | gtg | tgc | cag | 2 | G | C |
| TCGA-09-2051 | ABL1      | ENST00000318560 | p.K87N   | c.261G>C   | Unverified | GAA | AAG | CTC | 3 | G | C |
| TCGA-29-1764 | ABLIM2    | ENST00000447017 | p.K161N  | c.483G>C   | Unverified | ATC | AAG | AAT | 3 | G | C |
| TCGA-23-1022 | ACAA2     | ENST00000285093 | p.R371P  | c.1112G>C  | Verified   | AGG | CGT | CGA | 2 | G | C |
| TCGA-09-2056 | ACCS      | ENST00000263776 | p.G221R  | c.661G>C   | Verified   | ACT | GGG | CTA | 1 | G | C |
| TCGA-13-1497 | ACLY      | ENST00000352035 | p.L43F   | c.129G>C   | Verified   | cgc | ttg | ctg | 3 | G | C |
| TCGA-61-2095 | ACRC      | ENST00000373695 | p.E263Q  | c.787G>C   | Unverified | TCG | GAA | GCT | 1 | G | C |
| TCGA-29-1783 | ACTBL2    | ENST00000423391 | p.A261P  | c.781G>C   | Unverified | GAA | GCC | ATT | 1 | G | C |
| TCGA-13-1499 | ACTL8     | ENST00000375406 | p.W328C  | c.984G>C   | Verified   | GTC | TGG | GAG | 3 | G | C |
| TCGA-04-1655 | ACTR6     | ENST00000188312 | p.V389L  | c.1165G>C  | Unverified | AGC | GTC | TGT | 1 | G | C |
| TCGA-23-1120 | ACTR8     | ENST00000335754 | p.D525H  | c.1573G>C  | Unverified | TCT | GAC | GAC | 1 | G | C |
| TCGA-13-0884 | ACVR1     | ENST00000263640 | p.L495F  | c.1485G>C  | Verified   | ACT | TTG | ACC | 3 | G | C |
| TCGA-24-0979 | ACVR1B    | NM_020328       | p.?      | c.979+1G>C | Verified   | caa | ggg | aag | 1 | G | C |
| TCGA-25-1318 | ADAM22    | ENST00000265727 | p.G577R  | c.1729G>C  | Verified   | GAA | GGG | ACG | 1 | G | C |
| TCGA-25-1318 | ADAM22    | ENST00000265727 | p.G577R  | c.1729G>C  | Verified   | GAA | GGG | ACG | 1 | G | C |
| TCGA-25-1318 | ADAM22_EM | ENST00000398209 | p.G577R  | c.1729G>C  | Verified   | GAA | GGG | ACG | 1 | G | C |
| TCGA-25-1318 | ADAM22_EM | ENST00000398209 | p.G577R  | c.1729G>C  | Verified   | GAA | GGG | ACG | 1 | G | C |
| TCGA-29-1693 | ADAMTS1   | ENST00000284984 | p.W528S  | c.1583G>C  | Unverified | CCG | TGG | GCG | 2 | G | C |
| TCGA-04-1337 | ADAMTS13  | ENST00000371929 | p.A822P  | c.2464G>C  | Unverified | GGA | GCA | GGC | 1 | G | C |
| TCGA-61-2109 | ADAMTS14  | NM_139155.1     | p.V272L  | c.814G>C   | Unverified | gtg | gtt | cgc | 1 | G | C |
| TCGA-25-2400 | ADAMTS19  | NM_133638.1     | p.Q889H  | c.2667G>C  | Verified   | gat | cag | aat | 3 | G | C |
| TCGA-23-1124 | ADAMTS6_E | ENST00000381055 | p.D837H  | c.2509G>C  | Verified   | GGA | GAT | AAT | 1 | G | C |
| TCGA-24-1470 | ADC       | ENST00000373443 | p.E250Q  | c.748G>C   | Verified   | TTT | GAA | GAG | 1 | G | C |
| TCGA-61-1737 | ADCY8     | ENST00000286355 | p.K811N  | c.2433G>C  | Unverified | GAC | AAG | TCG | 3 | G | C |
| TCGA-20-1687 | ADCY9     | ENST00000294016 | p.E353Q  | c.1057G>C  | Unverified | GAG | GAG | AGT | 1 | G | C |
| TCGA-23-1031 | ADD2      | ENST00000355733 | p.G591A  | c.1772G>C  | Verified   | TCT | GGT | CCG | 2 | G | C |
| TCGA-13-1488 | ADD3      | ENST00000356080 | p.E580D  | c.1740G>C  | Verified   | GCT | GAG | CAG | 3 | G | C |

|              |           |                 |          |            |            |     |     |     |   |   |   |
|--------------|-----------|-----------------|----------|------------|------------|-----|-----|-----|---|---|---|
| TCGA-24-1604 | ADRBK2    | ENST00000324198 | p.R659P  | c.1976G>C  | Verified   | TTG | CGT | CGT | 2 | G | C |
| TCGA-24-1846 | ADSS      | ENST00000366535 | p.D131H  | c.391G>C   | Unverified | tct | gac | aga | 1 | G | C |
| TCGA-29-1764 | AEBP1     | ENST00000223357 | p.E805D  | c.2415G>C  | Unverified | CAG | GAG | ACT | 3 | G | C |
| TCGA-13-1497 | AFF3      | ENST00000356421 | p.D1117H | c.3349G>C  | Verified   | ATC | GAC | TAT | 1 | G | C |
| TCGA-23-1124 | AGBL2     | ENST00000298861 | p.K858N  | c.2574G>C  | Verified   | CCA | AAG | AGA | 3 | G | C |
| TCGA-61-1907 | AGK       | ENST00000355413 | p.E186Q  | c.556G>C   | Unverified | GGA | GAG | ACA | 1 | G | C |
| TCGA-23-1117 | AGXT2     | ENST00000231420 | p.R182T  | c.545G>C   | Verified   | GCC | AGG | GCG | 2 | G | C |
| TCGA-23-1117 | AGXT2     | ENST00000231420 | p.R182T  | c.545G>C   | Verified   | GCC | AGG | GCG | 2 | G | C |
| TCGA-13-0885 | AGXT2     | ENST00000231420 | p.L14L   | c.42G>C    | Verified   | TGC | CTG | GTC | 3 | G | C |
| TCGA-24-1435 | AHCTF1    | ENST00000391829 | p.G192A  | c.575G>C   | Verified   | ACT | GGT | ATC | 2 | G | C |
| TCGA-29-1705 | AHNAK     | ENST00000378024 | p.G202G  | c.606G>C   | Unverified | TCT | GGG | AAG | 3 | G | C |
| TCGA-04-1331 | AHNAK2_EN | ENST00000333244 | p.E430Q  | c.1288G>C  | Verified   | CAG | GAG | ACA | 1 | G | C |
| TCGA-61-2109 | AHNAK2_EN | ENST00000333244 | p.V1848V | c.5544G>C  | Unverified | GAT | GTG | TCT | 3 | G | C |
| TCGA-29-2427 | AIFM1     | ENST00000319908 | p.K589N  | c.1767G>C  | Verified   | att | aag | gac | 3 | G | C |
| TCGA-09-2051 | AIM1      | ENST00000369066 | p.R1294T | c.3881G>C  | Unverified | TAC | AGG | GAC | 2 | G | C |
| TCGA-61-1738 | AK1       | ENST00000373176 | p.V182L  | c.544G>C   | Unverified | AGT | GTC | TTC | 1 | G | C |
| TCGA-61-1738 | AK1       | ENST00000373176 | p.V182L  | c.544G>C   | Unverified | AGT | GTC | TTC | 1 | G | C |
| TCGA-23-1114 | AKAP12    | ENST00000402676 | p.V115V  | c.345G>C   | Unverified | gat | gtg | agc | 3 | G | C |
| TCGA-13-1481 | AKAP2     | ENST00000374525 | p.G484R  | c.1450G>C  | Verified   | CCC | GGT | GCC | 1 | G | C |
| TCGA-23-1124 | AKAP9     | NM_147171.1     | p.Q1174H | c.3522G>C  | Verified   | ctt | cag | aaa | 3 | G | C |
| TCGA-29-1784 | AKAP9     | NM_147171.1     | p.K3723N | c.11169G>C | Unverified | cag | aag | aaa | 3 | G | C |
| TCGA-23-1124 | AKAP9_ENS | ENST00000356239 | p.Q1162H | c.3486G>C  | Verified   | CTT | CAG | AAA | 3 | G | C |
| TCGA-29-1784 | AKAP9_ENS | ENST00000356239 | p.K3719N | c.11157G>C | Unverified | CAG | AAG | AAA | 3 | G | C |
| TCGA-24-1104 | ALAS1     | ENST00000394965 | p.S311S  | c.933G>C   | Verified   | TCC | TCG | TGC | 3 | G | C |
| TCGA-24-1104 | ALCAM     | ENST00000306107 | p.E460Q  | c.1378G>C  | Verified   | ACA | GAG | GAA | 1 | G | C |
| TCGA-04-1651 | ALG10B    | ENST00000308742 | p.Q235H  | c.705G>C   | Unverified | CTT | CAG | TTT | 3 | G | C |
| TCGA-04-1651 | ALG10B    | ENST00000308742 | p.Q235H  | c.705G>C   | Unverified | CTT | CAG | TTT | 3 | G | C |
| TCGA-29-1691 | ALG2      | ENST00000476832 | p.R378P  | c.1133G>C  | Unverified | ATC | CGT | GAA | 2 | G | C |
| TCGA-24-2267 | ALKBH8_EN | ENST00000428149 | p.W290C  | c.870G>C   | Verified   | CTT | TGG | ACC | 3 | G | C |
| TCGA-24-2290 | ALLC      | ENST00000252505 | p.A115P  | c.343G>C   | Unverified | GCT | GCA | GCC | 1 | G | C |
| TCGA-24-2290 | ALLC      | ENST00000252505 | p.A115P  | c.343G>C   | Unverified | GCT | GCA | GCC | 1 | G | C |
| TCGA-10-0930 | ALPK2     | NM_052947       | p.E41Q   | c.121G>C   | Verified   | tca | gag | cct | 1 | G | C |
| TCGA-10-0930 | ALPK2     | NM_052947       | p.E41Q   | c.121G>C   | Verified   | tca | gag | cct | 1 | G | C |
| TCGA-10-0930 | ALPK2_ENS | ENST00000361673 | p.E675Q  | c.2023G>C  | Verified   | TCA | GAG | CCT | 1 | G | C |

|              |            |                 |          |             |            |     |     |     |   |   |   |
|--------------|------------|-----------------|----------|-------------|------------|-----|-----|-----|---|---|---|
| TCGA-10-0930 | ALPK2_ENST | ENST00000361673 | p.E675Q  | c.2023G>C   | Verified   | TCA | GAG | CCT | 1 | G | C |
| TCGA-23-1022 | ALPK3      | ENST00000258888 | p.D1160H | c.3478G>C   | Verified   | ATA | GAT | TCC | 1 | G | C |
| TCGA-29-1761 | AMBP       | ENST00000265132 | p.R39P   | c.116G>C    | Unverified | TCT | CGG | ATC | 2 | G | C |
| TCGA-36-1577 | AMHR2      | ENST00000257863 | p.V227L  | c.679G>C    | Verified   | ctg | gtt | gcc | 1 | G | C |
| TCGA-24-1845 | AMIGO1     | ENST00000369862 | p.G470R  | c.1408G>C   | Unverified | ACA | GGC | AAG | 1 | G | C |
| TCGA-04-1331 | AMOTL2     | ENST00000249883 | p.S298T  | c.893G>C    | Unverified | GTG | AGT | GCC | 2 | G | C |
| TCGA-13-1498 | ANAPC16    | ENST00000299381 | p.E44D   | c.132G>C    | Verified   | GGA | GAG | ATG | 3 | G | C |
| TCGA-09-2049 | ANKRD11    | ENST00000301030 | p.K77N   | c.231G>C    | Unverified | GAG | AAG | CAG | 3 | G | C |
| TCGA-25-2401 | ANKRD44    | NM_153697.1     | p.A593P  | c.1777G>C   | Verified   | gaa | gcg | ctt | 1 | G | C |
| TCGA-09-2050 | ANKS1A     | ENST00000360359 | p.?      | c.2994+1G>C | Verified   | AAC | AAG | AAC | 3 | G | C |
| TCGA-23-1123 | ANKS6      | ENST00000353234 | p.V126L  | c.376G>C    | Verified   | AGT | GTG | GCA | 1 | G | C |
| TCGA-23-1123 | ANKS6      | ENST00000353234 | p.V126L  | c.376G>C    | Verified   | AGT | GTG | GCA | 1 | G | C |
| TCGA-24-1431 | ANKZF1     | ENST00000323348 | p.A500P  | c.1498G>C   | Verified   | CTT | GCT | GCT | 1 | G | C |
| TCGA-24-1463 | ANLN       | ENST00000265748 | p.E994Q  | c.2980G>C   | Verified   | TTT | GAA | GAT | 1 | G | C |
| TCGA-04-1655 | ANO6       | ENST00000320560 | p.V624L  | c.1870G>C   | Unverified | GAA | GTA | TTA | 1 | G | C |
| TCGA-04-1655 | ANO6_ENST  | ENST00000425752 | p.V624L  | c.1870G>C   | Unverified | GAA | GTA | TTA | 1 | G | C |
| TCGA-04-1362 | AP1M1      | ENST00000291439 | p.W408C  | c.1224G>C   | Verified   | CCC | TGG | GTG | 3 | G | C |
| TCGA-13-1488 | AP1M2      | ENST00000250244 | p.E284Q  | c.850G>C    | Verified   | ATT | GAG | AAG | 1 | G | C |
| TCGA-29-1783 | AP1M2      | ENST00000250244 | p.L16F   | c.48G>C     | Unverified | CCA | TTG | ATC | 3 | G | C |
| TCGA-29-1769 | APITD1     | ENST00000556104 | p.D37H   | c.109G>C    | Unverified | TTG | GAC | AAA | 1 | G | C |
| TCGA-29-1769 | APITD1_ENS | ENST00000309048 | p.D37H   | c.109G>C    | Unverified | TTG | GAC | AAA | 1 | G | C |
| TCGA-24-2288 | APOB       | ENST00000233242 | p.R4446T | c.13337G>C  | Unverified | CAC | AGA | AAT | 2 | G | C |
| TCGA-13-0893 | APOB       | ENST00000233242 | p.G210G  | c.630G>C    | Verified   | CTG | GGG | CAG | 3 | G | C |
| TCGA-13-0924 | APOB       | ENST00000233242 | p.K3627N | c.10881G>C  | Verified   | ACT | AAG | AAC | 3 | G | C |
| TCGA-23-1120 | AQP7       | ENST00000297988 | p.V82V   | c.246G>C    | Unverified | GGA | GTG | CAC | 3 | G | C |
| TCGA-23-1031 | AQP9       | ENST00000219919 | p.Q109H  | c.327G>C    | Verified   | GCC | CAG | TTC | 3 | G | C |
| TCGA-61-1915 | AQR        | ENST00000156471 | p.R410P  | c.1229G>C   | Unverified | TCT | CGT | CAT | 2 | G | C |
| TCGA-24-1417 | ARCN1      | ENST00000264028 | p.A163P  | c.487G>C    | Unverified | AAA | GCA | AAG | 1 | G | C |
| TCGA-24-2289 | ARFGAP2    | ENST00000524782 | p.L484L  | c.1452G>C   | Unverified | GTG | CTG | CCT | 3 | G | C |
| TCGA-25-1326 | ARHGAP22   | ENST00000249601 | p.E667Q  | c.1999G>C   | Verified   | gcg | gag | agg | 1 | G | C |
| TCGA-20-0990 | ARHGAP32_  | ENST00000310343 | p.G112A  | c.335G>C    | Verified   | AAA | GGT | CAC | 2 | G | C |
| TCGA-20-1685 | ARHGAP33   | ENST00000314737 | p.A836P  | c.2506G>C   | Unverified | cct | gcc | cag | 1 | G | C |
| TCGA-13-1408 | ARHGEF38   | ENST00000265154 | p.K67N   | c.201G>C    | Verified   | GAA | AAG | ATG | 3 | G | C |
| TCGA-13-0755 | ARID2      | ENST00000334344 | p.G1166R | c.3496G>C   | Verified   | CAA | GGG | ACT | 1 | G | C |



|              |           |                 |          |             |            |     |     |     |   |   |   |
|--------------|-----------|-----------------|----------|-------------|------------|-----|-----|-----|---|---|---|
| TCGA-23-1021 | ARL10     | ENST00000310389 | p.L216F  | c.648G>C    | Verified   | CTC | TTG | GCA | 3 | G | C |
| TCGA-04-1367 | ARL13A_EN | ENST00000450049 | p.R230T  | c.689G>C    | Verified   | AAA | AGA | CAG | 2 | G | C |
| TCGA-29-1781 | ARNTL     | ENST00000396441 | p.D567H  | c.1699G>C   | Unverified | TCT | GAT | AGT | 1 | G | C |
| TCGA-09-1665 | ARR3      | ENST00000307959 | p.D28H   | c.82G>C     | Verified   | GTG | GAC | ACG | 1 | G | C |
| TCGA-13-0755 | ASAP1     | ENST00000357668 | p.L998L  | c.2994G>C   | Verified   | GAC | CTG | CTA | 3 | G | C |
| TCGA-24-1469 | ASB11     | ENST00000480796 | p.R257T  | c.770G>C    | Unverified | cgt | aga | aat | 2 | G | C |
| TCGA-13-0791 | ASCC3     | ENST00000369162 | p.?      | c.2079+1G>C | Verified   | AAT | AAG | ATG | 3 | G | C |
| TCGA-29-1768 | ASMTL     | ENST00000381317 | p.T462T  | c.1386G>C   | Unverified | TGC | ACG | GGT | 3 | G | C |
| TCGA-09-2044 | ASPH      | ENST00000379454 | p.A377P  | c.1129G>C   | Verified   | CGA | GCA | AGA | 1 | G | C |
| TCGA-04-1347 | ASZ1      | ENST00000284629 | p.R298T  | c.893G>C    | Verified   | GAA | AGG | GAT | 2 | G | C |
| TCGA-29-1770 | ATAD2     | ENST00000287394 | p.D897H  | c.2689G>C   | Unverified | TCT | GAC | AAA | 1 | G | C |
| TCGA-29-1775 | ATAD2     | ENST00000287394 | p.D1054H | c.3160G>C   | Unverified | ATT | GAT | CTA | 1 | G | C |
| TCGA-04-1649 | ATAD2B_EN | ENST00000238789 | p.R1400T | c.4199G>C   | Unverified | GAG | AGA | TTG | 2 | G | C |
| TCGA-13-1497 | ATAD5     | ENST00000321990 | p.Q1274H | c.3822G>C   | Verified   | ACT | CAG | ACT | 3 | G | C |
| TCGA-13-0920 | ATAT1     | ENST00000376483 | p.E248Q  | c.742G>C    | Verified   | GTG | GAG | CCT | 1 | G | C |
| TCGA-13-0884 | ATL2      | ENST00000419554 | p.R104P  | c.311G>C    | Verified   | TTT | CGT | AAA | 2 | G | C |
| TCGA-24-1850 | ATL2      | ENST00000419554 | p.R556P  | c.1667G>C   | Unverified | CGT | CGA | ATG | 2 | G | C |
| TCGA-61-1907 | ATL3      | ENST00000398868 | p.L140L  | c.420G>C    | Unverified | GTT | CTG | ATG | 3 | G | C |
| TCGA-13-0919 | ATP2A3    | ENST00000359983 | p.?      | c.3139+1G>C | Verified   | AGG | GAA | GAA | 1 | G | C |
| TCGA-29-1763 | ATP2A3    | ENST00000359983 | p.A240A  | c.720G>C    | Unverified | ATG | GCG | GCA | 3 | G | C |
| TCGA-23-1120 | ATP2B2    | ENST00000383800 | p.E525D  | c.1575G>C   | Verified   | ACG | GAG | TGC | 3 | G | C |
| TCGA-13-1497 | ATP2B4    | ENST00000357681 | p.E335D  | c.1005G>C   | Verified   | AAT | GAG | GAA | 3 | G | C |
| TCGA-13-0755 | ATP5B     | ENST00000262030 | p.V99V   | c.297G>C    | Verified   | GAG | GTG | GCC | 3 | G | C |
| TCGA-23-1120 | ATP5G3    | ENST00000392541 | p.G41R   | c.121G>C    | Verified   | GAG | GGC | TCT | 1 | G | C |
| TCGA-04-1338 | ATP6V1C2  | ENST00000381661 | p.V118L  | c.352G>C    | Verified   | CTC | GTG | AGT | 1 | G | C |
| TCGA-29-1762 | ATRIP     | ENST00000320211 | p.A438P  | c.1312G>C   | Unverified | TTG | GCA | GCT | 1 | G | C |
| TCGA-24-1844 | ATRNL1    | ENST00000355044 | p.C1060S | c.3179G>C   | Unverified | GCT | TGT | ACA | 2 | G | C |
| TCGA-24-1847 | ATXN3L    | ENST00000380622 | p.E26Q   | c.76G>C     | Unverified | gga | gaa | tat | 1 | G | C |
| TCGA-29-1691 | AXL       | ENST00000359092 | p.K493N  | c.1479G>C   | Unverified | CGC | AAG | TCC | 3 | G | C |
| TCGA-24-2267 | B7        | ENST00000323702 | p.E27Q   | c.79G>C     | Verified   | ACA | GAG | GAG | 1 | G | C |
| TCGA-61-1904 | BAI1      | NM_001702.1     | p.V857V  | c.2571G>C   | Unverified | act | gtg | aaa | 3 | G | C |
| TCGA-04-1331 | BAI2      | ENST00000373658 | p.R1028P | c.3083G>C   | Unverified | GGG | CGG | ATG | 2 | G | C |
| TCGA-23-2077 | BAIAP2L1  | ENST00000005260 | p.G364A  | c.1091G>C   | Verified   | CAG | GGA | GAT | 2 | G | C |
| TCGA-13-0792 | BAMBI     | ENST00000375533 | p.Q189H  | c.567G>C    | Unverified | caa | cag | atg | 3 | G | C |

|              |             |                 |          |           |            |     |     |     |   |   |   |
|--------------|-------------|-----------------|----------|-----------|------------|-----|-----|-----|---|---|---|
| TCGA-13-1488 | BATF        | ENST00000286639 | p.L56L   | c.168G>C  | Verified   | cac | ctg | gag | 3 | G | C |
| TCGA-24-2024 | BBS1        | ENST00000318312 | p.V541L  | c.1621G>C | Verified   | CTG | GTG | CCA | 1 | G | C |
| TCGA-61-2008 | BBS7        | ENST00000264499 | p.M284I  | c.852G>C  | Verified   | CAG | ATG | TTG | 3 | G | C |
| TCGA-30-1857 | BCAN        | ENST00000329117 | p.G720R  | c.2158G>C | Unverified | TAC | GGC | GCG | 1 | G | C |
| TCGA-24-2288 | BCHE        | ENST00000264381 | p.M109I  | c.327G>C  | Unverified | gag | atg | tgg | 3 | G | C |
| TCGA-29-1764 | BCL9_ENST   | ENST00000234739 | p.G97A   | c.290G>C  | Unverified | AAG | GGG | AAA | 2 | G | C |
| TCGA-24-1844 | BCOR_ENST   | ENST00000378444 | p.V1196L | c.3586G>C | Unverified | AAG | GTG | TGC | 1 | G | C |
| TCGA-61-2102 | BEST4       | ENST00000372207 | p.A280P  | c.838G>C  | Verified   | CCA | GCC | CTG | 1 | G | C |
| TCGA-24-1423 | BID         | ENST00000317361 | p.S110T  | c.329G>C  | Unverified | CGC | AGC | AGC | 2 | G | C |
| TCGA-29-1705 | BIN1        | ENST00000316724 | p.D113H  | c.337G>C  | Unverified | atg | gat | tac | 1 | G | C |
| TCGA-29-1705 | BIN1_ENST   | ENST00000259238 | p.D113H  | c.337G>C  | Unverified | ATG | GAT | TAC | 1 | G | C |
| TCGA-13-0883 | BIRC6       | ENST00000421745 | p.R302T  | c.905G>C  | Verified   | TAT | AGG | TGG | 2 | G | C |
| TCGA-13-0884 | BMPR2       | ENST00000374580 | p.R974P  | c.2921G>C | Verified   | aaa | cgt | gtg | 2 | G | C |
| TCGA-24-1843 | BNC1        | ENST00000345382 | p.E852D  | c.2556G>C | Unverified | AGC | GAG | GGC | 3 | G | C |
| TCGA-30-1857 | BOD1L       | ENST00000040738 | p.D1708H | c.5122G>C | Unverified | GTG | GAT | GGC | 1 | G | C |
| TCGA-23-1022 | BOLA1       | ENST00000369150 | p.L19F   | c.57G>C   | Verified   | TGT | TTG | TGC | 3 | G | C |
| TCGA-09-2044 | BPTF        | ENST00000306378 | p.V920L  | c.2758G>C | Verified   | TTT | GTT | CCT | 1 | G | C |
| TCGA-13-1498 | BRD2_ENST   | ENST00000395289 | p.R528P  | c.1583G>C | Verified   | CTT | CGG | GCA | 2 | G | C |
| TCGA-24-1849 | BRD4_ENST   | ENST00000263377 | p.E1258Q | c.3772G>C | Unverified | CAG | GAG | CGC | 1 | G | C |
| TCGA-24-1844 | BRD8        | ENST00000254900 | p.V847L  | c.2539G>C | Unverified | AGT | GTC | CCA | 1 | G | C |
| TCGA-24-1844 | BRD8_ENST   | ENST00000230901 | p.V920L  | c.2758G>C | Unverified | AGT | GTC | CCA | 1 | G | C |
| TCGA-20-0990 | BST2        | ENST00000252593 | p.V35V   | c.105G>C  | Verified   | ATC | GTG | ATT | 3 | G | C |
| TCGA-24-1849 | BTK         | ENST00000308731 | p.G164A  | c.491G>C  | Unverified | ATG | GGC | TGC | 2 | G | C |
| TCGA-23-1031 | C10orf113   | ENST00000377118 | p.C35S   | c.104G>C  | Verified   | TCT | TGT | GTG | 2 | G | C |
| TCGA-23-1031 | C10orf113_f | ENST00000377118 | p.C35S   | c.104G>C  | Verified   | TCT | TGT | GTG | 2 | G | C |
| TCGA-23-1117 | C10orf54    | ENST00000394957 | p.A174P  | c.520G>C  | Verified   | GAT | GCA | CCA | 1 | G | C |
| TCGA-23-1117 | C10orf54    | ENST00000394957 | p.A174P  | c.520G>C  | Verified   | GAT | GCA | CCA | 1 | G | C |
| TCGA-29-1762 | C11orf2     | ENST00000279281 | p.G628R  | c.1882G>C | Unverified | GTG | GGG | CTC | 1 | G | C |
| TCGA-04-1331 | C11orf30    | ENST00000334736 | p.V415L  | c.1243G>C | Verified   | CAA | GTG | CAA | 1 | G | C |
| TCGA-13-0885 | C11orf47    | ENST00000354685 | p.G330R  | c.988G>C  | Verified   | TTT | GGG | ATC | 1 | G | C |
| TCGA-04-1362 | C11orf63    | ENST00000227349 | p.A146P  | c.436G>C  | Verified   | GAA | GCG | TTG | 1 | G | C |
| TCGA-24-1563 | C11orf66    | ENST00000338608 | p.G320R  | c.958G>C  | Verified   | ACA | GGG | TTC | 1 | G | C |
| TCGA-24-2289 | C12orf34    | ENST00000358906 | p.K394N  | c.1182G>C | Unverified | AGC | AAG | AGT | 3 | G | C |
| TCGA-04-1638 | C12orf35    | ENST00000312561 | p.M168I  | c.504G>C  | Unverified | CAG | ATG | ATC | 3 | G | C |

|              |             |                 |          |             |            |     |     |     |   |   |   |
|--------------|-------------|-----------------|----------|-------------|------------|-----|-----|-----|---|---|---|
| TCGA-04-1651 | C12orf39    | ENST00000256969 | p.R71T   | c.212G>C    | Unverified | GAA | AGA | CGA | 2 | G | C |
| TCGA-04-1651 | C12orf39    | ENST00000256969 | p.R71T   | c.212G>C    | Unverified | GAA | AGA | CGA | 2 | G | C |
| TCGA-29-1761 | C12orf41    | ENST00000420613 | p.G164R  | c.490G>C    | Unverified | AGA | GGT | GAC | 1 | G | C |
| TCGA-13-0762 | C12orf41    | ENST00000420613 | p.Q160H  | c.480G>C    | Verified   | GAT | CAG | ACA | 3 | G | C |
| TCGA-13-0762 | C12orf41    | ENST00000420613 | p.Q160H  | c.480G>C    | Verified   | GAT | CAG | ACA | 3 | G | C |
| TCGA-29-1761 | C12orf41_EI | ENST00000420613 | p.G164R  | c.490G>C    | Unverified | AGA | GGT | GAC | 1 | G | C |
| TCGA-13-0906 | C12orf63    | ENST00000342887 | p.E1042Q | c.3124G>C   | Verified   | ATA | GAA | CGT | 1 | G | C |
| TCGA-13-0904 | C14orf135   | ENST00000404681 | p.V741L  | c.2221G>C   | Verified   | ACA | GTA | ATG | 1 | G | C |
| TCGA-13-0920 | C14orf149   | ENST00000247194 | p.A207P  | c.619G>C    | Verified   | TCT | GCA | AAG | 1 | G | C |
| TCGA-13-0760 | C14orf43    | ENST00000286523 | p.C442S  | c.1325G>C   | Verified   | GAC | TGT | GGG | 2 | G | C |
| TCGA-29-1693 | C14orf43    | ENST00000286523 | p.K205N  | c.615G>C    | Unverified | GCC | AAG | AAA | 3 | G | C |
| TCGA-24-1849 | C15orf39    | ENST00000360639 | p.E244Q  | c.730G>C    | Unverified | TCT | GAG | GGG | 1 | G | C |
| TCGA-24-1849 | C15orf39    | ENST00000360639 | p.E438D  | c.1314G>C   | Unverified | GAA | GAG | AAG | 3 | G | C |
| TCGA-04-1347 | C15orf48    | ENST00000396650 | p.A31P   | c.91G>C     | Verified   | TTC | GCT | GTG | 1 | G | C |
| TCGA-13-0755 | C15orf57    | ENST00000358005 | p.A69P   | c.205G>C    | Verified   | TGG | GCT | CCC | 1 | G | C |
| TCGA-13-0886 | C17orf46    | ENST00000331780 | p.E96Q   | c.286G>C    | Verified   | GAG | GAG | TCT | 1 | G | C |
| TCGA-24-1847 | C17orf57    | ENST00000331493 | p.E564Q  | c.1690G>C   | Unverified | CCA | GAA | TTT | 1 | G | C |
| TCGA-24-1474 | C17orf76    | ENST00000325618 | p.R121P  | c.362G>C    | Unverified | CAG | CGT | GGA | 2 | G | C |
| TCGA-30-1714 | C18orf34    | ENST00000300227 | p.E501Q  | c.1501G>C   | Unverified | AAG | GAG | GCT | 1 | G | C |
| TCGA-30-1714 | C18orf34_EI | ENST00000383096 | p.E501Q  | c.1501G>C   | Unverified | AAG | GAG | GCT | 1 | G | C |
| TCGA-13-0884 | C1orf127    | ENST00000377008 | p.R80T   | c.239G>C    | Verified   | CAG | AGG | TGG | 2 | G | C |
| TCGA-04-1649 | C1orf131    | ENST00000366649 | p.D162H  | c.484G>C    | Unverified | GTG | GAT | ACA | 1 | G | C |
| TCGA-23-1110 | C1orf158    | ENST00000288048 | p.R115P  | c.344G>C    | Verified   | CTC | CGC | ACT | 2 | G | C |
| TCGA-24-1563 | C1orf52     | ENST00000471115 | p.D81H   | c.241G>C    | Verified   | ATA | GAC | TGG | 1 | G | C |
| TCGA-20-1686 | C1orf87     | ENST00000371201 | p.?      | c.1193-1G>C | Unverified | ACA | GGG | AAG | 2 | G | C |
| TCGA-04-1338 | C1QL3       | ENST00000298943 | p.S214T  | c.641G>C    | Verified   | GCC | AGT | AAC | 2 | G | C |
| TCGA-29-1783 | C20orf132_f | ENST00000400441 | p.S343T  | c.1028G>C   | Unverified | GCC | AGC | ATG | 2 | G | C |
| TCGA-23-1124 | C20orf54    | ENST00000217254 | p.E145Q  | c.433G>C    | Verified   | GGT | GAA | GGA | 1 | G | C |
| TCGA-24-1104 | C21orf7     | ENST00000399947 | p.K174N  | c.522G>C    | Verified   | AAA | AAG | GAA | 3 | G | C |
| TCGA-13-0760 | C2CD2       | ENST00000380486 | p.G376A  | c.1127G>C   | Verified   | CTG | GGC | TCG | 2 | G | C |
| TCGA-23-1022 | C2CD3       | ENST00000313663 | p.R371P  | c.1112G>C   | Verified   | AAT | CGG | TTT | 2 | G | C |
| TCGA-13-1489 | C2orf16     | ENST00000408964 | p.Q1635H | c.4905G>C   | Unverified | TCT | CAG | AGG | 3 | G | C |
| TCGA-13-1489 | C2orf16_ENI | ENST00000408964 | p.Q1635H | c.4905G>C   | Unverified | TCT | CAG | AGG | 3 | G | C |
| TCGA-24-1470 | C2orf63     | ENST00000407122 | p.G275R  | c.823G>C    | Verified   | CAA | GGC | ATT | 1 | G | C |

|              |             |                 |          |            |            |     |     |     |   |   |   |
|--------------|-------------|-----------------|----------|------------|------------|-----|-----|-----|---|---|---|
| TCGA-24-1470 | C2orf63_EN: | ENST00000407122 | p.G275R  | c.823G>C   | Verified   | CAA | GGC | ATT | 1 | G | C |
| TCGA-04-1331 | C2orf78     | ENST00000342345 | p.R470S  | c.1410G>C  | Verified   | GTC | AGG | AAG | 3 | G | C |
| TCGA-09-2051 | C3orf26     | ENST00000421999 | p.K100N  | c.300G>C   | Unverified | ATG | AAG | GAC | 3 | G | C |
| TCGA-23-1117 | C3orf58     | ENST00000315691 | p.A230P  | c.688G>C   | Verified   | TTT | GCA | AAG | 1 | G | C |
| TCGA-23-1117 | C3orf58     | ENST00000315691 | p.A230P  | c.688G>C   | Verified   | TTT | GCA | AAG | 1 | G | C |
| TCGA-23-1118 | C3orf63     | ENST00000431842 | p.D371H  | c.1111G>C  | Verified   | GCT | GAC | ATC | 1 | G | C |
| TCGA-29-1763 | C5orf64     | ENST00000505642 | p.E41D   | c.123G>C   | Unverified | ATA | GAG | ACA | 3 | G | C |
| TCGA-13-0905 | C6orf168    | ENST00000389677 | p.G52G   | c.156G>C   | Verified   | GGT | GGG | ATC | 3 | G | C |
| TCGA-24-1850 | C6orf70     | ENST00000366773 | p.V68L   | c.202G>C   | Unverified | AGC | GTG | AGG | 1 | G | C |
| TCGA-61-2109 | C7orf29     | ENST00000343855 | p.E202Q  | c.604G>C   | Unverified | TGG | GAG | AAT | 1 | G | C |
| TCGA-29-1703 | C7orf41     | ENST00000324453 | p.E108Q  | c.322G>C   | Unverified | TTT | GAA | GAG | 1 | G | C |
| TCGA-24-2289 | C7orf42     | ENST00000341567 | p.D81H   | c.241G>C   | Unverified | AAC | GAC | ACC | 1 | G | C |
| TCGA-24-1470 | C7orf58     | ENST00000310396 | p.L446L  | c.1338G>C  | Verified   | TGT | CTG | TCC | 3 | G | C |
| TCGA-24-1464 | C8orf73     | ENST00000398882 | p.?      | c.295-1G>C | Verified   | CAG | GTT | CCC | 1 | G | C |
| TCGA-24-1464 | C8orf73     | ENST00000398882 | p.?      | c.295-1G>C | Verified   | CAG | GTT | CCC | 1 | G | C |
| TCGA-24-1464 | C8orf73_EN: | ENST00000398882 | p.?      | c.295-1G>C | Verified   | CAG | GTT | CCC | 1 | G | C |
| TCGA-13-0893 | C9orf46     | ENST00000223864 | p.Q46H   | c.138G>C   | Verified   | ATG | CAG | ATT | 3 | G | C |
| TCGA-09-2044 | C9orf72     | ENST00000380003 | p.G458R  | c.1372G>C  | Verified   | CCA | GGC | CTA | 1 | G | C |
| TCGA-04-1651 | C9orf79     | ENST00000325643 | p.A1169P | c.3505G>C  | Unverified | TGT | GCC | CTC | 1 | G | C |
| TCGA-04-1651 | C9orf79     | ENST00000325643 | p.A1169P | c.3505G>C  | Unverified | TGT | GCC | CTC | 1 | G | C |
| TCGA-29-1783 | CA10        | ENST00000285273 | p.Q150H  | c.450G>C   | Unverified | GGA | CAG | GCC | 3 | G | C |
| TCGA-13-0916 | CA6         | ENST00000377443 | p.R132T  | c.395G>C   | Verified   | ATC | AGA | CAT | 2 | G | C |
| TCGA-23-1116 | CABS1       | ENST00000273936 | p.D80H   | c.238G>C   | Unverified | GAT | GAT | ATG | 1 | G | C |
| TCGA-04-1336 | CABS1       | ENST00000273936 | p.K354N  | c.1062G>C  | Verified   | CCT | AAG | ATC | 3 | G | C |
| TCGA-13-0760 | CACNA1A_E   | ENST00000357018 | p.K1159N | c.3477G>C  | Verified   | GCT | AAG | ACT | 3 | G | C |
| TCGA-61-1740 | CACNA1E     | ENST00000367570 | p.L1736L | c.5208G>C  | Unverified | ATC | CTG | GGG | 3 | G | C |
| TCGA-61-1740 | CACNA1E_EI  | ENST00000367573 | p.L1736L | c.5208G>C  | Unverified | ATC | CTG | GGG | 3 | G | C |
| TCGA-29-1769 | CACNA1S     | ENST00000362061 | p.E1693D | c.5079G>C  | Unverified | GAA | GAG | ACA | 3 | G | C |
| TCGA-13-0924 | CACNA2D1    | ENST00000356860 | p.R754T  | c.2261G>C  | Verified   | AAA | AGG | AGC | 2 | G | C |
| TCGA-13-0755 | CACNB1      | ENST00000344140 | p.K390N  | c.1170G>C  | Verified   | ATC | AAG | ATC | 3 | G | C |
| TCGA-09-0369 | CAD         | ENST00000264705 | p.V823L  | c.2467G>C  | Verified   | TCA | GTG | GAC | 1 | G | C |
| TCGA-09-0369 | CAD         | ENST00000264705 | p.V823L  | c.2467G>C  | Verified   | TCA | GTG | GAC | 1 | G | C |
| TCGA-13-1481 | CAD         | ENST00000264705 | p.M67I   | c.201G>C   | Verified   | GAA | ATG | GAT | 3 | G | C |
| TCGA-23-1114 | CALCRL      | ENST00000392370 | p.C436S  | c.1307G>C  | Unverified | GAC | TGT | CCT | 2 | G | C |

|              |           |                 |          |             |            |     |     |     |   |   |   |
|--------------|-----------|-----------------|----------|-------------|------------|-----|-----|-----|---|---|---|
| TCGA-23-1031 | CALM3     | ENST00000291295 | p.M145I  | c.435G>C    | Verified   | CAG | ATG | ATG | 3 | G | C |
| TCGA-29-1696 | CAMKK1    | ENST00000348335 | p.D285H  | c.853G>C    | Unverified | ggg | gat | gat | 1 | G | C |
| TCGA-29-1696 | CAMKK1    | ENST00000348335 | p.D285H  | c.853G>C    | Unverified | ggg | gat | gat | 1 | G | C |
| TCGA-29-1696 | CAMKK1_EN | ENST00000158166 | p.D323H  | c.967G>C    | Unverified | GGG | GAT | GAT | 1 | G | C |
| TCGA-29-1696 | CAMKK1_EN | ENST00000158166 | p.D323H  | c.967G>C    | Unverified | GGG | GAT | GAT | 1 | G | C |
| TCGA-29-1775 | CANT1     | ENST00000392446 | p.D150H  | c.448G>C    | Unverified | AAA | GAC | CAT | 1 | G | C |
| TCGA-61-2094 | CAPN6     | ENST00000324068 | p.D37H   | c.109G>C    | Unverified | aat | gat | tct | 1 | G | C |
| TCGA-13-0913 | CAPN7     | ENST00000253693 | p.D516H  | c.1546G>C   | Verified   | ATA | GAC | AAC | 1 | G | C |
| TCGA-23-2077 | CAPZA3    | ENST00000317658 | p.G136A  | c.407G>C    | Verified   | AAA | GGA | AAT | 2 | G | C |
| TCGA-04-1362 | CARS      | ENST00000397111 | p.V268L  | c.802G>C    | Verified   | TCT | GTC | TAC | 1 | G | C |
| TCGA-09-2056 | CASC3     | ENST00000264645 | p.R323P  | c.968G>C    | Verified   | GGT | CGT | GCT | 2 | G | C |
| TCGA-13-0795 | CASD1     | ENST00000297273 | p.L443F  | c.1329G>C   | Verified   | ATT | TTG | ATT | 3 | G | C |
| TCGA-13-0924 | CASP5     | NM_004347.1     | p.E173D  | c.519G>C    | Verified   | aga | gag | gac | 3 | G | C |
| TCGA-13-1507 | CCAR1     | ENST00000265872 | p.W200C  | c.600G>C    | Verified   | AAA | TGG | AAT | 3 | G | C |
| TCGA-09-2056 | CCDC116   | ENST00000292779 | p.A166P  | c.496G>C    | Verified   | ATG | GCC | GGC | 1 | G | C |
| TCGA-13-0760 | CCDC147   | ENST00000369704 | p.D22H   | c.64G>C     | Verified   | AGA | GAT | TTT | 1 | G | C |
| TCGA-29-1781 | CCDC155   | ENST00000447857 | p.R73P   | c.218G>C    | Unverified | GCA | CGC | CTC | 2 | G | C |
| TCGA-61-1910 | CCDC34_EN | ENST00000328697 | p.E217Q  | c.649G>C    | Unverified | GAG | GAA | AAA | 1 | G | C |
| TCGA-13-1497 | CCDC57    | ENST00000445854 | p.E287D  | c.861G>C    | Verified   | GAG | GAG | CTC | 3 | G | C |
| TCGA-13-0760 | CCDC64    | ENST00000397558 | p.?      | c.1309-1G>C | Verified   | ACG | GTG | ACA | 1 | G | C |
| TCGA-30-1718 | CCDC77    | ENST00000239830 | p.E418Q  | c.1252G>C   | Unverified | GTA | GAA | GGC | 1 | G | C |
| TCGA-13-0903 | CCDC88B   | ENST00000356786 | p.V497L  | c.1489G>C   | Verified   | CCT | GTT | CTT | 1 | G | C |
| TCGA-23-1022 | CCDC88C   | ENST00000389857 | p.L1075L | c.3225G>C   | Verified   | CAG | CTG | CTA | 3 | G | C |
| TCGA-13-0887 | CCKBR     | ENST00000334619 | p.A327P  | c.979G>C    | Verified   | CTG | GCT | AAG | 1 | G | C |
| TCGA-13-0762 | CCNG2     | ENST00000316355 | p.D264H  | c.790G>C    | Verified   | cca | gat | ctt | 1 | G | C |
| TCGA-13-0762 | CCNG2     | ENST00000316355 | p.D264H  | c.790G>C    | Verified   | cca | gat | ctt | 1 | G | C |
| TCGA-24-2289 | CCT3      | ENST00000295688 | p.V332L  | c.994G>C    | Unverified | ATA | GTC | AGC | 1 | G | C |
| TCGA-61-1998 | CCT8L2    | ENST00000359963 | p.V362L  | c.1084G>C   | Unverified | GTG | GTA | TTT | 1 | G | C |
| TCGA-61-2102 | CD101     | ENST00000369470 | p.Q223H  | c.669G>C    | Verified   | GTA | CAG | CTC | 3 | G | C |
| TCGA-13-1489 | CD2BP2    | ENST00000305596 | p.E288Q  | c.862G>C    | Verified   | TGG | GAG | AAC | 1 | G | C |
| TCGA-23-2077 | CD300E    | ENST00000328630 | p.R79T   | c.236G>C    | Verified   | ATC | AGA | GAC | 2 | G | C |
| TCGA-13-0755 | CD34      | ENST00000310833 | p.W317C  | c.951G>C    | Verified   | AGC | TGG | AGC | 3 | G | C |
| TCGA-29-1769 | CD37      | ENST00000323906 | p.K40N   | c.120G>C    | Unverified | GAC | AAG | ACC | 3 | G | C |
| TCGA-29-1769 | CD37_ENST | ENST00000391859 | p.K40N   | c.120G>C    | Unverified | GAC | AAG | ACC | 3 | G | C |

|              |           |                 |          |             |            |     |     |     |   |   |   |
|--------------|-----------|-----------------|----------|-------------|------------|-----|-----|-----|---|---|---|
| TCGA-25-1326 | CD38      | ENST00000226279 | p.C119S  | c.356G>C    | Verified   | CCT | TGC | AAC | 2 | G | C |
| TCGA-13-0761 | CD3E      | ENST00000361763 | p.V134L  | c.400G>C    | Verified   | ATT | GTC | ATA | 1 | G | C |
| TCGA-13-0761 | CD3E      | ENST00000361763 | p.V134L  | c.400G>C    | Verified   | ATT | GTC | ATA | 1 | G | C |
| TCGA-13-1481 | CDAN1     | ENST00000356231 | p.E1163Q | c.3487G>C   | Verified   | GTG | GAG | AAG | 1 | G | C |
| TCGA-29-1761 | CDC20     | ENST00000310955 | p.E142D  | c.426G>C    | Unverified | CCA | GAG | GGT | 3 | G | C |
| TCGA-29-1784 | CDC27     | ENST00000066544 | p.R709T  | c.2126G>C   | Unverified | CAC | AGA | GCC | 2 | G | C |
| TCGA-29-1784 | CDC27_ENS | ENST00000531206 | p.R715T  | c.2144G>C   | Unverified | CAC | AGA | GCC | 2 | G | C |
| TCGA-29-1703 | CDC42BPA  | ENST00000366767 | p.?      | c.2344-1G>C | Unverified | aca | gat | atg | 1 | G | C |
| TCGA-13-0761 | CDC42BPA  | ENST00000366767 | p.L1576F | c.4728G>C   | Unverified | tct | ttg | tcc | 3 | G | C |
| TCGA-13-0761 | CDC42BPA  | ENST00000366767 | p.L1576F | c.4728G>C   | Unverified | tct | ttg | tcc | 3 | G | C |
| TCGA-29-1703 | CDC42BPA_ | ENST00000366766 | p.?      | c.2587-1G>C | Unverified | ACA | GAT | ATG | 1 | G | C |
| TCGA-29-1703 | CDC42BPA_ | ENST00000366769 | p.?      | c.2587-1G>C | Unverified | ACA | GAT | ATG | 1 | G | C |
| TCGA-25-2400 | CDC42BPG_ | ENST00000342711 | p.A81P   | c.241G>C    | Unverified | GGA | GCC | TTT | 1 | G | C |
| TCGA-04-1367 | CDC7      | ENST00000234626 | p.E533Q  | c.1597G>C   | Unverified | TTA | GAA | GGC | 1 | G | C |
| TCGA-13-1510 | CDH20     | ENST00000262717 | p.S60T   | c.179G>C    | Verified   | AGG | AGC | TGG | 2 | G | C |
| TCGA-13-0887 | CDH6      | ENST00000265071 | p.G42A   | c.125G>C    | Verified   | TCT | GGA | AAC | 2 | G | C |
| TCGA-04-1367 | CDK1      | ENST00000395284 | p.D73H   | c.217G>C    | Verified   | CAG | GAT | TCC | 1 | G | C |
| TCGA-04-1367 | CDK1_ENST | ENST00000395284 | p.D73H   | c.217G>C    | Verified   | CAG | GAT | TCC | 1 | G | C |
| TCGA-25-1326 | CDK17     | ENST00000261211 | p.K343N  | c.1029G>C   | Verified   | ACA | AAG | ACC | 3 | G | C |
| TCGA-61-2095 | CDK5RAP2  | ENST00000349780 | p.V1290V | c.3870G>C   | Verified   | gat | gtg | gat | 3 | G | C |
| TCGA-24-1422 | CDKAL1    | ENST00000378610 | p.V381L  | c.1141G>C   | Verified   | CTT | GTT | GAA | 1 | G | C |
| TCGA-13-0884 | CDSN      | ENST00000376288 | p.E524D  | c.1572G>C   | Verified   | GGA | GAG | TTA | 3 | G | C |
| TCGA-23-1022 | CELF1     | ENST00000358597 | p.A97P   | c.289G>C    | Verified   | CCT | GCT | GAC | 1 | G | C |
| TCGA-04-1343 | CELF4     | ENST00000361795 | p.S29T   | c.86G>C     | Verified   | GGC | AGT | GCC | 2 | G | C |
| TCGA-29-1691 | CELSR1    | ENST00000262738 | p.V1908L | c.5722G>C   | Unverified | TGT | GTG | GAT | 1 | G | C |
| TCGA-23-1022 | CELSR3    | ENST00000164024 | p.R1937P | c.5810G>C   | Verified   | CAC | CGA | GTG | 2 | G | C |
| TCGA-29-1764 | CENPC1    | ENST00000273853 | p.D221H  | c.661G>C    | Unverified | ATA | GAT | AAT | 1 | G | C |
| TCGA-36-1577 | CENPJ     | ENST00000381884 | p.E212D  | c.636G>C    | Verified   | GGA | GAG | AGA | 3 | G | C |
| TCGA-23-1031 | CEP192    | ENST00000325971 | p.S1794T | c.5381G>C   | Verified   | CAA | AGC | ATC | 2 | G | C |
| TCGA-23-1021 | CEP95     | ENST00000556440 | p.D412H  | c.1234G>C   | Verified   | GAG | GAT | GGA | 1 | G | C |
| TCGA-09-2049 | CERKL     | ENST00000410087 | p.G252A  | c.755G>C    | Verified   | GCT | GGG | ATG | 2 | G | C |
| TCGA-09-2044 | CGA       | ENST00000369582 | p.G96A   | c.287G>C    | Verified   | ATG | GGG | GGT | 2 | G | C |
| TCGA-13-0905 | CGRRF1    | ENST00000216420 | p.G69A   | c.206G>C    | Verified   | TTT | GGC | TTA | 2 | G | C |
| TCGA-24-1604 | CHAD      | ENST00000258969 | p.L231L  | c.693G>C    | Verified   | CCC | CTG | AAA | 3 | G | C |

|              |            |                 |          |            |            |     |     |     |   |   |   |
|--------------|------------|-----------------|----------|------------|------------|-----|-----|-----|---|---|---|
| TCGA-30-1718 | CHD1       | ENST00000284049 | p.E778D  | c.2334G>C  | Unverified | cag | gag | gcc | 3 | G | C |
| TCGA-24-1843 | CHD3       | ENST00000330494 | p.V461L  | c.1381G>C  | Unverified | CGC | GTA | TGC | 1 | G | C |
| TCGA-61-2009 | CHD8       | ENST00000399982 | p.A406P  | c.1216G>C  | Verified   | cag | gct | ggc | 1 | G | C |
| TCGA-04-1367 | CHMP1A     | ENST00000253475 | p.A227P  | c.679G>C   | Unverified | CCG | GCA | GCC | 1 | G | C |
| TCGA-61-1895 | CHN2       | ENST00000222792 | p.D374H  | c.1120G>C  | Unverified | ata | gat | gca | 1 | G | C |
| TCGA-61-1895 | CHN2_ENST  | ENST00000409041 | p.D238H  | c.712G>C   | Unverified | ATA | GAT | GCA | 1 | G | C |
| TCGA-24-2288 | CHPF2      | ENST0000035307  | p.S467T  | c.1400G>C  | Unverified | GTC | AGC | CTG | 2 | G | C |
| TCGA-13-0923 | CHPF2      | ENST0000035307  | p.Q53H   | c.159G>C   | Unverified | CCA | CAG | AAT | 3 | G | C |
| TCGA-29-1762 | CHRD1      | ENST00000218054 | p.E296D  | c.888G>C   | Unverified | caa | gag | tgt | 3 | G | C |
| TCGA-24-1849 | CHRM3      | ENST00000255380 | p.M188I  | c.564G>C   | Unverified | GTG | ATG | ATC | 3 | G | C |
| TCGA-61-1913 | CHRM5      | ENST00000383263 | p.L50F   | c.150G>C   | Unverified | GTC | TTG | GTC | 3 | G | C |
| TCGA-61-1910 | CHRNA7     | ENST00000306901 | p.E24D   | c.72G>C    | Unverified | GGC | GAG | TTC | 3 | G | C |
| TCGA-04-1367 | CIC        | ENST00000160740 | p.W37S   | c.110G>C   | Verified   | CCT | TGG | CAC | 2 | G | C |
| TCGA-30-1718 | CKAP5      | ENST00000529230 | p.A198P  | c.592G>C   | Unverified | GAT | GCT | CTG | 1 | G | C |
| TCGA-29-1769 | CLCA4      | ENST00000370563 | p.V909L  | c.2725G>C  | Unverified | GTT | GTA | ATT | 1 | G | C |
| TCGA-13-0885 | CLEC9A     | ENST00000355819 | p.G46R   | c.136G>C   | Verified   | ATG | GGA | TTA | 1 | G | C |
| TCGA-30-1718 | CLTC_ENST0 | ENST00000269122 | p.R967S  | c.2901G>C  | Unverified | TAC | AGG | AGA | 3 | G | C |
| TCGA-13-0760 | CMTM2      | ENST00000268595 | p.C157S  | c.470G>C   | Verified   | GCT | TGT | GCG | 2 | G | C |
| TCGA-13-0762 | CMYA5      | ENST00000238522 | p.L3295L | c.9885G>C  | Verified   | AGT | CTG | GAA | 3 | G | C |
| TCGA-13-0762 | CMYA5      | ENST00000238522 | p.L3295L | c.9885G>C  | Verified   | AGT | CTG | GAA | 3 | G | C |
| TCGA-04-1338 | CNGA1      | ENST00000358519 | p.D472H  | c.1414G>C  | Verified   | TTA | GAC | ACA | 1 | G | C |
| TCGA-25-2392 | CNO        | ENST00000320776 | p.P119P  | c.357G>C   | Unverified | GTG | CCG | CGC | 3 | G | C |
| TCGA-61-1737 | CNOT1      | ENST00000317147 | p.R964T  | c.2891G>C  | Unverified | AAC | AGA | TTG | 2 | G | C |
| TCGA-61-1737 | CNOT1_ENS  | ENST00000441024 | p.R964T  | c.2891G>C  | Unverified | AAC | AGA | TTG | 2 | G | C |
| TCGA-13-0923 | CNOT3      | ENST00000221232 | p.Q684H  | c.2052G>C  | Verified   | GCA | CAG | TAT | 3 | G | C |
| TCGA-23-1031 | CNTFR      | ENST00000351266 | p.G85A   | c.254G>C   | Verified   | AGT | GGC | CTC | 2 | G | C |
| TCGA-13-0792 | CNTN2      | ENST00000331830 | p.E776Q  | c.2326G>C  | Verified   | AAC | GAG | AGC | 1 | G | C |
| TCGA-61-1906 | COL13A1    | ENST00000398969 | p.?      | c.553-1G>C | Unverified | CCG | GGA | CCC | 1 | G | C |
| TCGA-61-1906 | COL13A1    | ENST00000398969 | p.?      | c.553-1G>C | Unverified | CCG | GGA | CCC | 1 | G | C |
| TCGA-61-1906 | COL13A1_EI | ENST00000398978 | p.?      | c.604-1G>C | Unverified | CCG | GGA | CCC | 1 | G | C |
| TCGA-61-1906 | COL13A1_EI | ENST00000398978 | p.?      | c.604-1G>C | Unverified | CCG | GGA | CCC | 1 | G | C |
| TCGA-29-1711 | COL15A1    | ENST00000375001 | p.W546S  | c.1637G>C  | Unverified | AGA | TGG | ATC | 2 | G | C |
| TCGA-29-1711 | COL15A1    | ENST00000375001 | p.W546S  | c.1637G>C  | Unverified | AGA | TGG | ATC | 2 | G | C |
| TCGA-13-0883 | COL1A1     | ENST00000225964 | p.G446A  | c.1337G>C  | Unverified | ACT | GGT | GCT | 2 | G | C |

|              |           |                 |          |           |            |     |     |     |   |   |   |
|--------------|-----------|-----------------|----------|-----------|------------|-----|-----|-----|---|---|---|
| TCGA-29-1693 | COL2A1    | ENST00000337299 | p.G456R  | c.1366G>C | Unverified | GCA | GGT | CCC | 1 | G | C |
| TCGA-29-1693 | COL2A1_EN | ENST00000380518 | p.G525R  | c.1573G>C | Unverified | GCA | GGT | CCC | 1 | G | C |
| TCGA-30-1718 | COL4A5    | ENST00000361603 | p.G1330A | c.3989G>C | Unverified | cca | gga | ttc | 2 | G | C |
| TCGA-24-2024 | COL6A2    | ENST00000300527 | p.E695Q  | c.2083G>C | Verified   | CTC | GAG | TGG | 1 | G | C |
| TCGA-61-2094 | COL6A6    | ENST00000358511 | p.A1179P | c.3535G>C | Unverified | ACA | GCG | GGT | 1 | G | C |
| TCGA-09-2044 | COL7A1    | ENST00000328333 | p.G2351A | c.7052G>C | Verified   | CCC | GGA | GAC | 2 | G | C |
| TCGA-24-2035 | COLEC10   | ENST00000332843 | p.E217Q  | c.649G>C  | Verified   | AGG | GAG | GGA | 1 | G | C |
| TCGA-24-1469 | COLEC12   | ENST00000400256 | p.Q266H  | c.798G>C  | Verified   | TTG | CAG | ACG | 3 | G | C |
| TCGA-09-1674 | CPA3      | ENST00000296046 | p.T283T  | c.849G>C  | Unverified | GAG | ACG | AAA | 3 | G | C |
| TCGA-24-0975 | CPNE2     | ENST00000290776 | p.Q20H   | c.60G>C   | Unverified | CCC | CAG | TAT | 3 | G | C |
| TCGA-23-1124 | CPS1      | ENST00000233072 | p.S847T  | c.2540G>C | Verified   | CCA | AGC | AGC | 2 | G | C |
| TCGA-29-1763 | CPT1B     | ENST00000395650 | p.E291Q  | c.871G>C  | Unverified | CGT | GAA | GAA | 1 | G | C |
| TCGA-23-1809 | CRB1      | ENST00000367400 | p.G770A  | c.2309G>C | Unverified | CGC | GGC | AGA | 2 | G | C |
| TCGA-24-1463 | CRB1      | ENST00000367400 | p.G101A  | c.302G>C  | Verified   | CCT | GGG | TAC | 2 | G | C |
| TCGA-09-2049 | CREBBP    | ENST00000262367 | p.V1467V | c.4401G>C | Verified   | TAT | GTG | ACA | 3 | G | C |
| TCGA-13-1505 | CROCC     | ENST00000375541 | p.E89D   | c.267G>C  | Verified   | CAG | GAG | CTG | 3 | G | C |
| TCGA-25-1313 | CRYAA     | ENST00000291554 | p.D58H   | c.172G>C  | Unverified | ctg | gac | tcc | 1 | G | C |
| TCGA-24-1843 | CRYBA4    | ENST00000354760 | p.E111D  | c.333G>C  | Unverified | TTC | GAG | CAA | 3 | G | C |
| TCGA-24-1845 | CSE1L     | ENST00000262982 | p.L248F  | c.744G>C  | Unverified | aca | ttg | gat | 3 | G | C |
| TCGA-24-1464 | CSMD3     | ENST00000297405 | p.W1472C | c.4416G>C | Verified   | gtc | tgg | gac | 3 | G | C |
| TCGA-09-2056 | CSPP1     | ENST00000262210 | p.D833H  | c.2497G>C | Verified   | AGA | GAC | AAT | 1 | G | C |
| TCGA-13-1489 | CSPP1     | ENST00000262210 | p.K1019N | c.3057G>C | Verified   | CAG | AAG | AGG | 3 | G | C |
| TCGA-25-2392 | CSRNP1    | ENST00000273153 | p.R31P   | c.92G>C   | Verified   | TCT | CGC | TCC | 2 | G | C |
| TCGA-29-1783 | CSRNP2    | ENST00000228515 | p.S34T   | c.101G>C  | Unverified | GAT | AGT | GCT | 2 | G | C |
| TCGA-13-0905 | CSRNP3    | ENST00000342316 | p.D337H  | c.1009G>C | Verified   | TTA | GAT | TGC | 1 | G | C |
| TCGA-13-0885 | CSRP2BP   | ENST00000278816 | p.S316T  | c.947G>C  | Verified   | TTG | AGC | TCC | 2 | G | C |
| TCGA-23-1120 | CST9      | ENST00000376971 | p.S135T  | c.404G>C  | Verified   | CAC | AGC | TGT | 2 | G | C |
| TCGA-10-0930 | CTAGE4    | ENST00000486333 | p.G236R  | c.706G>C  | Unverified | AAA | GGA | GAA | 1 | G | C |
| TCGA-10-0930 | CTAGE4    | ENST00000486333 | p.G236R  | c.706G>C  | Unverified | AAA | GGA | GAA | 1 | G | C |
| TCGA-13-1497 | CTCF      | ENST00000264010 | p.E291D  | c.873G>C  | Verified   | GAT | GAG | AGA | 3 | G | C |
| TCGA-36-1577 | CTHRC1    | ENST00000330295 | p.G181R  | c.541G>C  | Verified   | CAA | GGA | AGC | 1 | G | C |
| TCGA-36-1577 | CTIF      | ENST00000256413 | p.Q369H  | c.1107G>C | Unverified | CAG | CAG | AAC | 3 | G | C |
| TCGA-61-1907 | CTNNB1    | ENST00000361383 | p.E479D  | c.1437G>C | Unverified | gag | gag | gag | 3 | G | C |
| TCGA-13-0762 | CTSA      | ENST00000372484 | p.D271H  | c.811G>C  | Verified   | AAA | GAC | CTG | 1 | G | C |



|              |           |                 |          |             |            |     |     |     |   |   |   |
|--------------|-----------|-----------------|----------|-------------|------------|-----|-----|-----|---|---|---|
| TCGA-13-0762 | CTSA      | ENST00000372484 | p.D271H  | c.811G>C    | Verified   | AAA | GAC | CTG | 1 | G | C |
| TCGA-29-1764 | CTSG      | ENST00000216336 | p.V144V  | c.432G>C    | Unverified | ACT | GTG | GCC | 3 | G | C |
| TCGA-13-1512 | CTTN      | ENST00000301843 | p.G311A  | c.932G>C    | Verified   | TAT | GGG | GTG | 2 | G | C |
| TCGA-13-0884 | CTTNBP2   | ENST00000160373 | p.R1617T | c.4850G>C   | Verified   | CCT | AGA | AGT | 2 | G | C |
| TCGA-23-1031 | CTTNBP2   | ENST00000160373 | p.S1131T | c.3392G>C   | Verified   | GGA | AGC | TTG | 2 | G | C |
| TCGA-23-1031 | CTXN1     | ENST00000318978 | p.V47V   | c.141G>C    | Verified   | ATG | GTG | CGC | 3 | G | C |
| TCGA-04-1336 | CUBN      | ENST00000377833 | p.R1911T | c.5732G>C   | Verified   | TTA | AGG | ATC | 2 | G | C |
| TCGA-29-1769 | CUL1      | ENST00000409469 | p.E457Q  | c.1369G>C   | Unverified | ata | gaa | gac | 1 | G | C |
| TCGA-24-2024 | CUL3      | ENST00000264414 | p.D92H   | c.274G>C    | Verified   | gaa | gat | gta | 1 | G | C |
| TCGA-23-2078 | CUL9      | ENST00000252050 | p.Q381H  | c.1143G>C   | Verified   | CAG | CAG | ACA | 3 | G | C |
| TCGA-23-1123 | CUX2      | ENST00000261726 | p.G1243R | c.3727G>C   | Verified   | GGG | GGT | CCT | 1 | G | C |
| TCGA-23-1123 | CUX2      | ENST00000261726 | p.G1243R | c.3727G>C   | Verified   | GGG | GGT | CCT | 1 | G | C |
| TCGA-24-2280 | CUX2      | ENST00000261726 | p.R1457R | c.4371G>C   | Unverified | CAG | CGG | CGG | 3 | G | C |
| TCGA-04-1530 | CYP26A1   | ENST00000371531 | p.G231A  | c.692G>C    | Verified   | TTT | GGA | GGA | 2 | G | C |
| TCGA-20-1683 | CYP26A1   | ENST00000371531 | p.S372T  | c.1115G>C   | Unverified | AGG | AGC | TGT | 2 | G | C |
| TCGA-20-0991 | CYP2A7    | ENST00000301146 | p.G336A  | c.1007G>C   | Verified   | ATC | GGC | AAG | 2 | G | C |
| TCGA-29-1763 | CYP2B6    | ENST00000324071 | p.L78L   | c.234G>C    | Unverified | ATG | CTG | TGT | 3 | G | C |
| TCGA-23-1124 | CYP2C9    | ENST00000260682 | p.E444D  | c.1332G>C   | Verified   | ATG | GAG | CTG | 3 | G | C |
| TCGA-61-1904 | CYP3A43   | ENST00000222382 | p.T374T  | c.1122G>C   | Unverified | GTT | ACG | AGA | 3 | G | C |
| TCGA-24-1422 | CYP4A11   | ENST00000310638 | p.L131F  | c.393G>C    | Verified   | GGC | TTG | CTC | 3 | G | C |
| TCGA-04-1347 | DAGLA     | ENST00000257215 | p.G799A  | c.2396G>C   | Verified   | TCA | GGC | TTC | 2 | G | C |
| TCGA-13-0886 | DCD       | ENST00000293371 | p.D107H  | c.319G>C    | Verified   | CTT | GAC | TCA | 1 | G | C |
| TCGA-29-1768 | DCHS2     | ENST00000357232 | p.L1087F | c.3261G>C   | Unverified | TTT | TTG | AAC | 3 | G | C |
| TCGA-61-2095 | DCTD      | ENST00000438320 | p.A106P  | c.316G>C    | Unverified | GTT | GCC | TTG | 1 | G | C |
| TCGA-24-2288 | DCTN2     | ENST00000434715 | p.D60H   | c.178G>C    | Unverified | TAT | GAC | AAG | 1 | G | C |
| TCGA-25-1326 | DCUN1D4   | ENST00000334635 | p.R49P   | c.146G>C    | Verified   | CTG | CGG | TCT | 2 | G | C |
| TCGA-29-1695 | DDR2      | ENST00000367922 | p.?      | c.1857-1G>C | Unverified | GCC | AGG | AAT | 3 | G | C |
| TCGA-29-1695 | DDR2_ENST | ENST00000367922 | p.?      | c.1857-1G>C | Unverified | GCC | AGG | AAT | 3 | G | C |
| TCGA-29-1777 | DDX11     | ENST00000542838 | p.A607P  | c.1819G>C   | Unverified | TTT | GCC | CAA | 1 | G | C |
| TCGA-29-1777 | DDX11_ENS | ENST00000407793 | p.A607P  | c.1819G>C   | Unverified | TTT | GCC | CAA | 1 | G | C |
| TCGA-23-1124 | DDX24     | ENST00000330836 | p.G289R  | c.865G>C    | Verified   | cca | ggc | aag | 1 | G | C |
| TCGA-61-2102 | DDX39B    | ENST00000396172 | p.D416H  | c.1246G>C   | Verified   | CCT | GAT | GAG | 1 | G | C |
| TCGA-13-0760 | DDX3X     | ENST00000399959 | p.R548T  | c.1643G>C   | Verified   | GAG | AGG | AAC | 2 | G | C |
| TCGA-24-1463 | DDX5      | ENST00000225792 | p.G533A  | c.1598G>C   | Verified   | aat | ggt | gtt | 2 | G | C |

|              |            |                 |          |             |            |     |     |     |   |   |   |
|--------------|------------|-----------------|----------|-------------|------------|-----|-----|-----|---|---|---|
| TCGA-13-0755 | DDX60L     | ENST00000260184 | p.V1260L | c.3778G>C   | Verified   | TTT | GTT | GAG | 1 | G | C |
| TCGA-23-2077 | DENND2A    | ENST00000275884 | p.R36T   | c.107G>C    | Verified   | GCC | AGA | GCC | 2 | G | C |
| TCGA-61-1915 | DENND4C    | ENST00000380437 | p.R807T  | c.2420G>C   | Unverified | GAG | AGG | AGT | 2 | G | C |
| TCGA-30-1855 | DENND5A    | ENST00000328194 | p.D867H  | c.2599G>C   | Unverified | CAG | GAT | ATG | 1 | G | C |
| TCGA-29-1784 | DEPDC5     | ENST00000400248 | p.R1376P | c.4127G>C   | Unverified | CAT | CGG | AAA | 2 | G | C |
| TCGA-29-1784 | DEPDC5_EN  | ENST00000535622 | p.R1307P | c.3920G>C   | Unverified | CAT | CGG | AAA | 2 | G | C |
| TCGA-13-0904 | DGKE       | ENST00000284061 | p.L22L   | c.66G>C     | Unverified | cac | ctg | atc | 3 | G | C |
| TCGA-23-1122 | DGKH       | ENST00000337343 | p.G734A  | c.2201G>C   | Verified   | gct | ggg | agt | 2 | G | C |
| TCGA-30-1718 | DHRS2      | ENST00000250383 | p.V40V   | c.120G>C    | Unverified | GCC | GTG | GTC | 3 | G | C |
| TCGA-30-1718 | DHRS2_ENS  | ENST00000344777 | p.V40V   | c.120G>C    | Unverified | GCC | GTG | GTC | 3 | G | C |
| TCGA-61-1915 | DHX29      | ENST00000251636 | p.R587S  | c.1761G>C   | Unverified | AAA | AGG | CAT | 3 | G | C |
| TCGA-23-1021 | DHX34      | ENST00000328771 | p.?      | c.1272+1G>C | Verified   | gac | aag | gta | 3 | G | C |
| TCGA-29-1785 | DHX57      | ENST00000295373 | p.R116P  | c.347G>C    | Unverified | ctc | cga | gac | 2 | G | C |
| TCGA-29-1785 | DHX57      | ENST00000295373 | p.R116P  | c.347G>C    | Unverified | ctc | cga | gac | 2 | G | C |
| TCGA-29-1775 | DHX9       | ENST00000367549 | p.D56H   | c.166G>C    | Unverified | AAA | GAT | GCA | 1 | G | C |
| TCGA-29-1770 | DIDO1      | ENST00000395343 | p.E134Q  | c.400G>C    | Unverified | AAG | GAA | CGA | 1 | G | C |
| TCGA-29-1770 | DIDO1_ENS  | ENST00000370371 | p.E134Q  | c.400G>C    | Unverified | AAG | GAA | CGA | 1 | G | C |
| TCGA-13-0923 | DIP2B      | ENST00000301180 | p.?      | c.797-1G>C  | Verified   | GAT | GGT | GTT | 2 | G | C |
| TCGA-25-2392 | DIS3L      | ENST00000319194 | p.?      | c.2608-1G>C | Verified   | ACC | GTA | AGA | 1 | G | C |
| TCGA-20-1687 | DIS3L      | ENST00000319194 | p.S297T  | c.890G>C    | Unverified | ATT | AGC | ACT | 2 | G | C |
| TCGA-20-1687 | DIS3L_ENST | ENST00000319212 | p.S380T  | c.1139G>C   | Unverified | ATT | AGC | ACT | 2 | G | C |
| TCGA-09-1665 | DKK2       | ENST00000285311 | p.C127S  | c.380G>C    | Verified   | atc | tgt | atc | 2 | G | C |
| TCGA-23-2078 | DKK3       | ENST00000396505 | p.V304L  | c.910G>C    | Unverified | gag | gtc | ccc | 1 | G | C |
| TCGA-13-1489 | DLGAP4     | ENST00000373913 | p.E109D  | c.327G>C    | Verified   | TTT | GAG | AAG | 3 | G | C |
| TCGA-24-1844 | DMBT1      | ENST00000368909 | p.C2360S | c.7079G>C   | Unverified | CGT | TGT | AAA | 2 | G | C |
| TCGA-24-1844 | DMBT1_ENS  | ENST00000368909 | p.C2360S | c.7079G>C   | Unverified | CGT | TGT | AAA | 2 | G | C |
| TCGA-24-1844 | DMBT1_ENS  | ENST00000368915 | p.C2489S | c.7466G>C   | Unverified | CGT | TGT | AAA | 2 | G | C |
| TCGA-13-1497 | DMD_ENST   | ENST00000378677 | p.Q1693H | c.5079G>C   | Verified   | ATT | CAG | GCT | 3 | G | C |
| TCGA-29-1693 | DMXL1      | ENST00000311085 | p.D2282H | c.6844G>C   | Unverified | TTA | GAT | GAA | 1 | G | C |
| TCGA-29-1777 | DNA2       | ENST00000399180 | p.V135V  | c.405G>C    | Unverified | CTG | GTG | TTG | 3 | G | C |
| TCGA-29-1777 | DNA2L      | ENST00000358410 | p.V49V   | c.147G>C    | Unverified | CTG | GTG | TTG | 3 | G | C |
| TCGA-29-1693 | DNAH10     | ENST00000339192 | p.E263Q  | c.787G>C    | Unverified | ATA | GAG | GCT | 1 | G | C |
| TCGA-29-1693 | DNAH10_EN  | ENST00000409039 | p.E445Q  | c.1333G>C   | Unverified | ATA | GAG | GCT | 1 | G | C |
| TCGA-24-2262 | DNAH11     | ENST00000328843 | p.K4003N | c.12009G>C  | Verified   | GCC | AAG | TGG | 3 | G | C |

|              |            |                 |          |            |            |     |     |     |   |   |   |
|--------------|------------|-----------------|----------|------------|------------|-----|-----|-----|---|---|---|
| TCGA-29-1711 | DNAH12     | ENST00000351747 | p.E412D  | c.1236G>C  | Unverified | TAT | GAG | ACA | 3 | G | C |
| TCGA-29-1711 | DNAH12     | ENST00000351747 | p.E412D  | c.1236G>C  | Unverified | TAT | GAG | ACA | 3 | G | C |
| TCGA-29-1711 | DNAH12L    | ENST00000311202 | p.E412D  | c.1236G>C  | Unverified | TAT | GAG | ACA | 3 | G | C |
| TCGA-29-1711 | DNAH12L    | ENST00000311202 | p.E412D  | c.1236G>C  | Unverified | TAT | GAG | ACA | 3 | G | C |
| TCGA-13-0761 | DNAH2      | ENST00000389173 | p.Q137H  | c.411G>C   | Verified   | AAC | CAG | CTT | 3 | G | C |
| TCGA-13-0761 | DNAH2      | ENST00000389173 | p.Q137H  | c.411G>C   | Verified   | AAC | CAG | CTT | 3 | G | C |
| TCGA-13-0807 | DNAH3      | ENST00000261383 | p.E4023Q | c.12067G>C | Verified   | TTA | GAA | GGT | 1 | G | C |
| TCGA-23-1031 | DNAH3      | ENST00000261383 | p.W1961C | c.5883G>C  | Verified   | GTG | TGG | ACC | 3 | G | C |
| TCGA-24-1843 | DNAH8      | NM_001371.1     | p.L4038L | c.12114G>C | Unverified | ctt | ctg | gac | 3 | G | C |
| TCGA-24-1843 | DNAH8_ENS  | ENST00000359357 | p.L4038L | c.12114G>C | Unverified | CTT | CTG | GAC | 3 | G | C |
| TCGA-13-1408 | DNAI2      | ENST00000311014 | p.D48H   | c.142G>C   | Unverified | GTG | GAC | ACG | 1 | G | C |
| TCGA-30-1857 | DNAJC12    | ENST00000225171 | p.A32P   | c.94G>C    | Unverified | ctg | gca | gaa | 1 | G | C |
| TCGA-30-1857 | DNAJC12_EI | ENST00000339758 | p.A32P   | c.94G>C    | Unverified | CTG | GCA | GAA | 1 | G | C |
| TCGA-13-0885 | DNHD1      | ENST00000254579 | p.G330R  | c.988G>C   | Verified   | TTT | GGG | ATC | 1 | G | C |
| TCGA-24-1435 | DOC2A      | ENST00000350119 | p.D120H  | c.358G>C   | Verified   | ATG | GAT | TTC | 1 | G | C |
| TCGA-23-2078 | DOCK2      | ENST00000256935 | p.W1074C | c.3222G>C  | Verified   | ATG | TGG | TAC | 3 | G | C |
| TCGA-13-0887 | DOCK7      | ENST00000340370 | p.R118T  | c.353G>C   | Verified   | ATA | AGA | AGT | 2 | G | C |
| TCGA-04-1655 | DOCK8      | ENST00000432829 | p.G16R   | c.46G>C    | Unverified | CTC | GGG | GAC | 1 | G | C |
| TCGA-04-1655 | DOCK8_ENS  | ENST00000453981 | p.G84R   | c.250G>C   | Unverified | CTC | GGG | GAC | 1 | G | C |
| TCGA-29-1785 | DOLPP1     | ENST00000372546 | p.V48V   | c.144G>C   | Unverified | TTC | GTG | ACC | 3 | G | C |
| TCGA-29-1785 | DOLPP1     | ENST00000372546 | p.V48V   | c.144G>C   | Unverified | TTC | GTG | ACC | 3 | G | C |
| TCGA-04-1530 | DOPEY2     | ENST00000399151 | p.W881C  | c.2643G>C  | Verified   | CTT | TGG | AAT | 3 | G | C |
| TCGA-04-1347 | DROSHA     | ENST00000511367 | p.R930T  | c.2789G>C  | Verified   | GAC | AGA | AAA | 2 | G | C |
| TCGA-13-0714 | DSCAM      | ENST00000400454 | p.K767N  | c.2301G>C  | Verified   | TGC | AAG | GTC | 3 | G | C |
| TCGA-29-1701 | DST        | ENST00000370765 | p.Q2421H | c.7263G>C  | Unverified | TAT | CAG | GAA | 3 | G | C |
| TCGA-20-1685 | DST_ENST0C | ENST00000244364 | p.E1850Q | c.5548G>C  | Unverified | ATG | GAG | GAG | 1 | G | C |
| TCGA-29-1701 | DST_ENST0C | ENST00000370765 | p.Q2421H | c.7263G>C  | Unverified | TAT | CAG | GAA | 3 | G | C |
| TCGA-20-1685 | DST_ENST0C | ENST00000370769 | p.E4264Q | c.12790G>C | Unverified | ATG | GAG | GAG | 1 | G | C |
| TCGA-24-1843 | DTL        | ENST00000366991 | p.S679T  | c.2036G>C  | Unverified | CGA | AGT | CCG | 2 | G | C |
| TCGA-13-0885 | DTNA_ENST  | ENST00000269190 | p.G277R  | c.829G>C   | Verified   | GCC | GGT | GGT | 1 | G | C |
| TCGA-24-1843 | DTX3L      | ENST00000296161 | p.S233T  | c.698G>C   | Unverified | AAA | AGC | AAC | 2 | G | C |
| TCGA-13-0761 | DYNC1LI1   | ENST00000273130 | p.L451F  | c.1353G>C  | Verified   | AGT | TTG | TTG | 3 | G | C |
| TCGA-13-0761 | DYNC1LI1   | ENST00000273130 | p.L451F  | c.1353G>C  | Verified   | AGT | TTG | TTG | 3 | G | C |
| TCGA-23-2077 | DYRK1B     | ENST00000348817 | p.Q72H   | c.216G>C   | Verified   | gcc | cag | cag | 3 | G | C |

|              |            |                 |         |           |            |     |     |     |   |   |   |
|--------------|------------|-----------------|---------|-----------|------------|-----|-----|-----|---|---|---|
| TCGA-29-1781 | DYTN       | ENST00000452335 | p.A558P | c.1672G>C | Unverified | GGA | GCT | CAG | 1 | G | C |
| TCGA-29-1781 | DYTN_ENST0 | ENST00000452335 | p.A558P | c.1672G>C | Unverified | GGA | GCT | CAG | 1 | G | C |
| TCGA-24-1103 | DZIP1L     | ENST00000327532 | p.Q122H | c.366G>C  | Verified   | CAG | CAG | CAG | 3 | G | C |
| TCGA-13-0762 | DZIP3      | ENST00000361582 | p.V567L | c.1699G>C | Verified   | TCT | GTC | TAC | 1 | G | C |
| TCGA-13-0762 | DZIP3      | ENST00000361582 | p.V567L | c.1699G>C | Verified   | TCT | GTC | TAC | 1 | G | C |
| TCGA-23-1117 | EAPP       | ENST00000250454 | p.R155T | c.464G>C  | Verified   | CAG | AGA | AGG | 2 | G | C |
| TCGA-23-1117 | EAPP       | ENST00000250454 | p.R155T | c.464G>C  | Verified   | CAG | AGA | AGG | 2 | G | C |
| TCGA-20-1686 | EBAG9      | ENST00000395785 | p.R24T  | c.71G>C   | Unverified | aag | aga | tta | 2 | G | C |
| TCGA-13-1510 | EBI3       | ENST00000221847 | p.V10L  | c.28G>C   | Unverified | CTT | GTC | CTC | 1 | G | C |
| TCGA-29-1781 | ECSIT      | ENST00000270517 | p.E235Q | c.703G>C  | Unverified | ATG | GAG | CCT | 1 | G | C |
| TCGA-04-1338 | ECT2       | ENST00000232458 | p.E45D  | c.135G>C  | Verified   | gaa | gag | atg | 3 | G | C |
| TCGA-24-2290 | EFNB3      | ENST00000226091 | p.G143G | c.429G>C  | Verified   | GAT | GGG | ACC | 3 | G | C |
| TCGA-24-2290 | EFNB3      | ENST00000226091 | p.G143G | c.429G>C  | Verified   | GAT | GGG | ACC | 3 | G | C |
| TCGA-13-0884 | EFR3A      | ENST00000254624 | p.V45L  | c.133G>C  | Verified   | GCA | GTA | TCT | 1 | G | C |
| TCGA-13-0900 | EGFR       | ENST00000275493 | p.E709Q | c.2125G>C | Unverified | AAG | GAA | ACT | 1 | G | C |
| TCGA-29-1761 | EHD3       | ENST00000322054 | p.A465P | c.1393G>C | Unverified | GGC | GCT | AAT | 1 | G | C |
| TCGA-23-1110 | EHHADH     | ENST00000231887 | p.V480V | c.1440G>C | Verified   | TTT | GTG | GGG | 3 | G | C |
| TCGA-24-0979 | EIF2AK3    | ENST00000303236 | p.E300Q | c.898G>C  | Verified   | GAA | GAA | CAG | 1 | G | C |
| TCGA-61-1740 | EIF2B5     | ENST00000273783 | p.V435V | c.1305G>C | Unverified | CAG | GTG | GTC | 3 | G | C |
| TCGA-13-0807 | EIF3E      | ENST00000220849 | p.E194D | c.582G>C  | Verified   | aaa | gag | acc | 3 | G | C |
| TCGA-13-0900 | EIF4A2     | ENST00000323963 | p.M316I | c.948G>C  | Verified   | ATC | ATG | AGG | 3 | G | C |
| TCGA-13-0920 | EIF4A3     | ENST00000269349 | p.A377P | c.1129G>C | Verified   | gtg | gcc | att | 1 | G | C |
| TCGA-30-1855 | EIF6       | ENST00000374436 | p.E127Q | c.379G>C  | Unverified | gaa | gaa | att | 1 | G | C |
| TCGA-04-1362 | ELK1       | ENST00000247161 | p.K35N  | c.105G>C  | Verified   | TTC | AAG | CTG | 3 | G | C |
| TCGA-61-1904 | ELN        | ENST00000252034 | p.G78G  | c.234G>C  | Unverified | GCA | GGG | CTC | 3 | G | C |
| TCGA-13-0900 | ELP4       | ENST00000350638 | p.G346A | c.1037G>C | Verified   | CAT | GGA | TTG | 2 | G | C |
| TCGA-30-1856 | ELP4       | ENST00000350638 | p.S22T  | c.65G>C   | Unverified | GCC | AGC | AAG | 2 | G | C |
| TCGA-30-1856 | ELP4_ENST0 | ENST00000395934 | p.S22T  | c.65G>C   | Unverified | GCC | AGC | AAG | 2 | G | C |
| TCGA-13-0920 | EML4       | ENST00000318522 | p.V782L | c.2344G>C | Verified   | GGT | GTC | TGG | 1 | G | C |
| TCGA-23-1022 | ENC1       | ENST00000302351 | p.G347R | c.1039G>C | Verified   | GGG | GGG | CGG | 1 | G | C |
| TCGA-23-1124 | ENPP1      | ENST00000360971 | p.E854Q | c.2560G>C | Verified   | AAA | GAG | CCA | 1 | G | C |
| TCGA-13-0885 | ENPP7      | ENST00000328313 | p.V36L  | c.106G>C  | Verified   | CTG | GTG | TCC | 1 | G | C |
| TCGA-23-1022 | ENSG000003 | ENST00000341450 | p.S26T  | c.77G>C   | Verified   | GGG | AGT | TTG | 2 | G | C |
| TCGA-30-1857 | ENSG000003 | ENST00000400226 | p.E208Q | c.622G>C  | Unverified | TTT | GAG | AAA | 1 | G | C |

|              |            |                 |          |            |            |     |     |     |   |   |   |
|--------------|------------|-----------------|----------|------------|------------|-----|-----|-----|---|---|---|
| TCGA-04-1338 | ENTPD5     | ENST00000334696 | p.A131P  | c.391G>C   | Verified   | ACA | GCA | GGA | 1 | G | C |
| TCGA-25-1326 | EPB41      | ENST00000349460 | p.W481S  | c.1442G>C  | Verified   | GAA | TGG | GAT | 2 | G | C |
| TCGA-24-1843 | EPB41L2    | ENST00000368128 | p.R318P  | c.953G>C   | Unverified | CTC | CGG | CAG | 2 | G | C |
| TCGA-24-2288 | EPC1       | ENST00000263062 | p.E285Q  | c.853G>C   | Unverified | TCT | GAG | GTT | 1 | G | C |
| TCGA-61-2009 | EPDR1      | ENST00000559325 | p.G108R  | c.322G>C   | Unverified | TTG | GGC | TTG | 1 | G | C |
| TCGA-24-1422 | EPDR1      | ENST00000559325 | p.S113S  | c.339G>C   | Unverified | CCC | TCG | GGC | 3 | G | C |
| TCGA-23-1120 | EPG5       | ENST00000282041 | p.E1162Q | c.3484G>C  | Unverified | CGA | GAA | CAA | 1 | G | C |
| TCGA-24-1103 | EPHA2      | ENST00000358432 | p.W912C  | c.2736G>C  | Verified   | GAG | TGG | CTG | 3 | G | C |
| TCGA-09-2049 | EPHX1      | ENST00000366837 | p.G245R  | c.733G>C   | Verified   | AAA | GGC | CTG | 1 | G | C |
| TCGA-24-1563 | EPHX2      | ENST00000521400 | p.S238T  | c.713G>C   | Verified   | ATG | AGC | CAT | 2 | G | C |
| TCGA-04-1361 | EPS15L1    | ENST00000248070 | p.D820H  | c.2458G>C  | Verified   | GCT | GAC | AGC | 1 | G | C |
| TCGA-04-1361 | EPS15L1    | ENST00000248070 | p.D820H  | c.2458G>C  | Verified   | GCT | GAC | AGC | 1 | G | C |
| TCGA-23-1123 | EPS15L1    | ENST00000248070 | p.G731A  | c.2192G>C  | Verified   | TTC | GGA | AGT | 2 | G | C |
| TCGA-23-1123 | EPS15L1    | ENST00000248070 | p.G731A  | c.2192G>C  | Verified   | TTC | GGA | AGT | 2 | G | C |
| TCGA-29-1784 | ERBB3      | ENST00000267101 | p.R491T  | c.1472G>C  | Unverified | CGC | AGA | GAC | 2 | G | C |
| TCGA-29-1784 | ERBB3_ENST | ENST00000267101 | p.R491T  | c.1472G>C  | Unverified | CGC | AGA | GAC | 2 | G | C |
| TCGA-09-2049 | ERI3       | ENST00000372257 | p.?      | c.666+1G>C | Verified   | CTG | GAG | AGG | 3 | G | C |
| TCGA-23-2077 | ERMP1      | ENST00000339450 | p.P681P  | c.2043G>C  | Verified   | AAT | CCG | AAG | 3 | G | C |
| TCGA-13-1481 | ERN1_ENST  | ENST00000433197 | p.G50A   | c.149G>C   | Verified   | ACA | GGC | TCA | 2 | G | C |
| TCGA-23-2077 | ESRP2      | ENST00000473183 | p.E535D  | c.1605G>C  | Verified   | AAG | GAG | CGC | 3 | G | C |
| TCGA-61-2109 | ESYT1      | ENST00000394048 | p.W615C  | c.1845G>C  | Unverified | GCT | TGG | GAC | 3 | G | C |
| TCGA-13-0913 | ETAA1      | ENST00000272342 | p.S630T  | c.1889G>C  | Verified   | GAC | AGT | AAG | 2 | G | C |
| TCGA-29-1695 | ETNK1      | ENST00000266517 | p.G146A  | c.437G>C   | Unverified | GAT | GGA | ATC | 2 | G | C |
| TCGA-29-1695 | ETNK1_ENST | ENST00000335148 | p.G146A  | c.437G>C   | Unverified | GAT | GGA | ATC | 2 | G | C |
| TCGA-61-2009 | ETV6       | ENST00000396373 | p.G375R  | c.1123G>C  | Verified   | aac | gga | ctg | 1 | G | C |
| TCGA-13-1505 | EXOC3L4    | ENST00000380069 | p.E649D  | c.1947G>C  | Verified   | CTG | GAG | ACT | 3 | G | C |
| TCGA-29-1711 | EXOC6B_EN  | ENST00000272427 | p.E45Q   | c.133G>C   | Unverified | GAA | GAA | CAT | 1 | G | C |
| TCGA-29-1711 | EXOC6B_EN  | ENST00000272427 | p.E45Q   | c.133G>C   | Unverified | GAA | GAA | CAT | 1 | G | C |
| TCGA-24-1422 | EYA2       | ENST00000327619 | p.V270V  | c.810G>C   | Verified   | CGT | GTG | TTC | 3 | G | C |
| TCGA-23-1031 | EYS        | ENST00000342421 | p.E335D  | c.1005G>C  | Verified   | agt | gag | ttt | 3 | G | C |
| TCGA-13-1497 | F8         | ENST00000360256 | p.A2227P | c.6679G>C  | Verified   | AAA | GCT | CGA | 1 | G | C |
| TCGA-13-1497 | F8_ENST000 | ENST00000360256 | p.A2227P | c.6679G>C  | Verified   | AAA | GCT | CGA | 1 | G | C |
| TCGA-04-1356 | FADD       | ENST00000301838 | p.R114S  | c.342G>C   | Verified   | aga | agg | ctg | 3 | G | C |
| TCGA-61-1725 | FAM113B    | ENST00000546455 | p.R49T   | c.146G>C   | Unverified | ctt | aga | gca | 2 | G | C |

|              |            |                 |          |            |            |     |     |     |   |   |   |
|--------------|------------|-----------------|----------|------------|------------|-----|-----|-----|---|---|---|
| TCGA-24-2288 | FAM118B    | ENST00000533050 | p.E285D  | c.855G>C   | Unverified | GAT | GAG | TTC | 3 | G | C |
| TCGA-29-1769 | FAM120C    | ENST00000375180 | p.D521H  | c.1561G>C  | Unverified | CCA | GAC | TCT | 1 | G | C |
| TCGA-23-1111 | FAM127C    | ENST00000391440 | p.E108Q  | c.322G>C   | Unverified | tgg | gag | gag | 1 | G | C |
| TCGA-13-1501 | FAM134A    | ENST00000430297 | p.E141D  | c.423G>C   | Verified   | AGT | GAG | GGT | 3 | G | C |
| TCGA-13-1501 | FAM134A    | ENST00000430297 | p.E141D  | c.423G>C   | Verified   | AGT | GAG | GGT | 3 | G | C |
| TCGA-23-1021 | FAM184A    | ENST00000338891 | p.E624Q  | c.1870G>C  | Verified   | AAA | GAA | GAA | 1 | G | C |
| TCGA-25-1313 | FAM189B    | ENST00000361361 | p.R549R  | c.1647G>C  | Verified   | GCC | CGG | TCA | 3 | G | C |
| TCGA-30-1856 | FAM196B    | ENST00000377365 | p.V166L  | c.496G>C   | Unverified | AAG | GTG | TCC | 1 | G | C |
| TCGA-13-1507 | FAM19A2    | ENST00000416284 | p.E60Q   | c.178G>C   | Verified   | GAA | GAA | CGG | 1 | G | C |
| TCGA-23-2077 | FAM21C     | ENST00000374362 | p.K744N  | c.2232G>C  | Verified   | GAT | AAG | AAG | 3 | G | C |
| TCGA-20-1686 | FAM40B     | ENST00000249344 | p.V311L  | c.931G>C   | Unverified | GTG | GTG | AAG | 1 | G | C |
| TCGA-09-2050 | FAM75D4    | ENST00000344803 | p.G730R  | c.2188G>C  | Verified   | CAT | GGA | CCG | 1 | G | C |
| TCGA-24-1103 | FAM83C     | ENST00000374408 | p.L713L  | c.2139G>C  | Verified   | GAC | CTG | GTC | 3 | G | C |
| TCGA-13-0884 | FAM98B     | ENST00000491535 | p.E78Q   | c.232G>C   | Verified   | CTA | GAG | AGC | 1 | G | C |
| TCGA-61-2009 | FASTKD2    | ENST00000236980 | p.V369V  | c.1107G>C  | Verified   | AAG | GTG | GTC | 3 | G | C |
| TCGA-04-1338 | FAT1       | ENST00000441802 | p.E3486D | c.10458G>C | Verified   | GAT | GAG | AAG | 3 | G | C |
| TCGA-29-1762 | FAT4       | ENST00000330166 | p.S3323T | c.9968G>C  | Unverified | GCT | AGC | GAC | 2 | G | C |
| TCGA-29-1762 | FAT4_ENSTC | ENST00000394329 | p.S3323T | c.9968G>C  | Unverified | GCT | AGC | GAC | 2 | G | C |
| TCGA-25-1326 | FBN1       | ENST00000316623 | p.C313S  | c.938G>C   | Verified   | TTT | TGC | AAA | 2 | G | C |
| TCGA-25-2392 | FBXL18     | NM_024963.2     | p.D582H  | c.1744G>C  | Unverified | tca | gac | atg | 1 | G | C |
| TCGA-23-1122 | FBXO18     | ENST00000379999 | p.E995Q  | c.2983G>C  | Verified   | ggg | gag | tac | 1 | G | C |
| TCGA-61-1913 | FBXO24     | ENST00000241071 | p.R442P  | c.1325G>C  | Unverified | ggc | cgc | ctc | 2 | G | C |
| TCGA-23-1022 | FBXO24     | ENST00000241071 | p.Q93H   | c.279G>C   | Verified   | gat | cag | ggt | 3 | G | C |
| TCGA-61-1913 | FBXO24_EN  | ENST00000427939 | p.R480P  | c.1439G>C  | Unverified | GGC | CGC | CTC | 2 | G | C |
| TCGA-09-2050 | FBXO38     | ENST00000340253 | p.E885Q  | c.2653G>C  | Verified   | tca | gaa | gta | 1 | G | C |
| TCGA-23-1117 | FBXW10     | ENST00000395667 | p.K374N  | c.1122G>C  | Verified   | ACG | AAG | AAT | 3 | G | C |
| TCGA-23-1117 | FBXW10     | ENST00000395667 | p.K374N  | c.1122G>C  | Verified   | ACG | AAG | AAT | 3 | G | C |
| TCGA-13-0883 | FBXW9      | NM_032301.1     | p.C52S   | c.155G>C   | Verified   | gcc | tgc | tgc | 2 | G | C |
| TCGA-24-1104 | FCAMR      | ENST00000400962 | p.E21Q   | c.61G>C    | Verified   | AGA | GAA | GTG | 1 | G | C |
| TCGA-61-1738 | FCGBP      | ENST00000221347 | p.S914T  | c.2741G>C  | Unverified | GGC | AGC | CAG | 2 | G | C |
| TCGA-61-1738 | FCGBP      | ENST00000221347 | p.S914T  | c.2741G>C  | Unverified | GGC | AGC | CAG | 2 | G | C |
| TCGA-29-1711 | FCGR1A     | ENST00000369168 | p.D324H  | c.970G>C   | Unverified | TGG | GAT | TTA | 1 | G | C |
| TCGA-29-1711 | FCGR1A     | ENST00000369168 | p.D324H  | c.970G>C   | Unverified | TGG | GAT | TTA | 1 | G | C |
| TCGA-04-1356 | FCN1       | ENST00000371806 | p.K23N   | c.69G>C    | Verified   | ATC | AAG | AAC | 3 | G | C |

|              |             |                 |          |             |            |     |     |     |   |   |   |
|--------------|-------------|-----------------|----------|-------------|------------|-----|-----|-----|---|---|---|
| TCGA-24-1849 | FCRL5       | ENST00000361835 | p.E920Q  | c.2758G>C   | Unverified | GGA | GAA | AAT | 1 | G | C |
| TCGA-13-0760 | FCRL6       | ENST00000368106 | p.V390L  | c.1168G>C   | Verified   | ACC | GTG | GGG | 1 | G | C |
| TCGA-09-0369 | FEZF1       | ENST00000442488 | p.Q225H  | c.675G>C    | Verified   | GCT | CAG | CTG | 3 | G | C |
| TCGA-09-0369 | FEZF1       | ENST00000442488 | p.Q225H  | c.675G>C    | Verified   | GCT | CAG | CTG | 3 | G | C |
| TCGA-29-1705 | FGD2        | ENST00000274963 | p.L173L  | c.519G>C    | Unverified | CGC | CTG | GAC | 3 | G | C |
| TCGA-24-0979 | FGD5        | NM_152536.2     | p.G287R  | c.859G>C    | Verified   | gag | ggg | aag | 1 | G | C |
| TCGA-29-1698 | FGD6        | ENST00000343958 | p.V1251L | c.3751G>C   | Unverified | ATT | GTA | TGC | 1 | G | C |
| TCGA-29-1699 | FILIP1L     | ENST00000331335 | p.E294Q  | c.880G>C    | Unverified | AAG | GAA | CTG | 1 | G | C |
| TCGA-29-1699 | FILIP1L_ENS | ENST00000354552 | p.E294Q  | c.880G>C    | Unverified | AAG | GAA | CTG | 1 | G | C |
| TCGA-13-1509 | FLAD1       | ENST00000292180 | p.E198Q  | c.592G>C    | Verified   | GAT | GAG | CTG | 1 | G | C |
| TCGA-24-2280 | FLG2        | ENST00000388718 | p.L572F  | c.1716G>C   | Unverified | GGG | TTG | GGC | 3 | G | C |
| TCGA-61-1900 | FLJ43860    | ENST00000599122 | p.G1147R | c.3439G>C   | Unverified | TTC | GGG | GAC | 1 | G | C |
| TCGA-04-1361 | FLJ90650    | ENST00000357872 | p.?      | c.1516-1G>C | Verified   | AAG | GGA | GCG | 1 | G | C |
| TCGA-04-1361 | FLJ90650    | ENST00000357872 | p.?      | c.1516-1G>C | Verified   | AAG | GGA | GCG | 1 | G | C |
| TCGA-61-1906 | FLNB        | ENST00000295956 | p.D130H  | c.388G>C    | Unverified | GAG | GAT | GAA | 1 | G | C |
| TCGA-61-1906 | FLNB        | ENST00000295956 | p.D130H  | c.388G>C    | Unverified | GAG | GAT | GAA | 1 | G | C |
| TCGA-24-1435 | FLNB        | ENST00000295956 | p.E1305D | c.3915G>C   | Verified   | GTG | GAG | GTG | 3 | G | C |
| TCGA-61-1906 | FLNB_ENSTC  | ENST00000490882 | p.D130H  | c.388G>C    | Unverified | GAG | GAT | GAA | 1 | G | C |
| TCGA-61-1906 | FLNB_ENSTC  | ENST00000490882 | p.D130H  | c.388G>C    | Unverified | GAG | GAT | GAA | 1 | G | C |
| TCGA-29-1693 | FLNC        | ENST00000325888 | p.V326V  | c.978G>C    | Unverified | AAG | GTG | GTT | 3 | G | C |
| TCGA-25-2391 | FLT3        | ENST00000241453 | p.V491L  | c.1471G>C   | Unverified | AAA | GTG | TTT | 1 | G | C |
| TCGA-24-2262 | FMN2        | ENST00000319653 | p.G1128A | c.3383G>C   | Unverified | GCG | GGC | ATA | 2 | G | C |
| TCGA-25-2400 | FMR1NB      | ENST00000370467 | p.V198L  | c.592G>C    | Verified   | ctg | gta | tgt | 1 | G | C |
| TCGA-13-1497 | FOSL2       | ENST00000264716 | p.E289Q  | c.865G>C    | Verified   | CTG | GAG | CAG | 1 | G | C |
| TCGA-09-1665 | FOXG1       | ENST00000382535 | p.L460F  | c.1380G>C   | Verified   | tct | ttg | cca | 3 | G | C |
| TCGA-29-1769 | FOXP4       | ENST00000373063 | p.T42T   | c.126G>C    | Unverified | ggc | acg | ggc | 3 | G | C |
| TCGA-29-1769 | FOXP4_ENS   | ENST00000373060 | p.T42T   | c.126G>C    | Unverified | GGC | ACG | GGC | 3 | G | C |
| TCGA-25-1313 | FRMPD1      | ENST00000377765 | p.A309P  | c.925G>C    | Verified   | CTC | GCG | GCT | 1 | G | C |
| TCGA-20-1686 | FRMPD2      | ENST00000374201 | p.R844S  | c.2532G>C   | Unverified | GTT | AGG | ATG | 3 | G | C |
| TCGA-24-2289 | FRYL        | ENST00000503238 | p.V1345L | c.4033G>C   | Unverified | ATG | GTG | ACT | 1 | G | C |
| TCGA-04-1338 | FSTL5       | ENST00000306100 | p.D212H  | c.634G>C    | Verified   | AAG | GAT | CTC | 1 | G | C |
| TCGA-13-0919 | FTSJD2      | ENST00000373451 | p.E370D  | c.1110G>C   | Verified   | GTG | GAG | GGG | 3 | G | C |
| TCGA-25-2042 | FUK         | ENST00000288078 | p.E1041D | c.3123G>C   | Unverified | AAG | GAG | GCC | 3 | G | C |
| TCGA-23-1120 | FYB_ENSTOC  | ENST00000351578 | p.R232T  | c.695G>C    | Verified   | GTC | AGG | TCC | 2 | G | C |

|              |            |                 |          |            |            |     |     |     |   |   |   |
|--------------|------------|-----------------|----------|------------|------------|-----|-----|-----|---|---|---|
| TCGA-24-2289 | FZD2       | ENST00000315323 | p.P505P  | c.1515G>C  | Unverified | atc | ccg | tgc | 3 | G | C |
| TCGA-29-1711 | GABRA4     | ENST00000264318 | p.D53H   | c.157G>C   | Unverified | CTG | GAC | AGT | 1 | G | C |
| TCGA-29-1711 | GABRA4     | ENST00000264318 | p.D53H   | c.157G>C   | Unverified | CTG | GAC | AGT | 1 | G | C |
| TCGA-13-0905 | GABRA6     | ENST00000274545 | p.V255L  | c.763G>C   | Verified   | ACA | GTC | ATT | 1 | G | C |
| TCGA-04-1337 | GABRB1     | ENST00000295454 | p.D450H  | c.1348G>C  | Verified   | ATA | GAC | AAG | 1 | G | C |
| TCGA-29-1784 | GANAB      | ENST00000356638 | p.A534P  | c.1600G>C  | Unverified | TCA | GCT | CCC | 1 | G | C |
| TCGA-25-1313 | GANAB      | ENST00000356638 | p.R493R  | c.1479G>C  | Verified   | ACC | CGG | GAT | 3 | G | C |
| TCGA-29-1764 | GARNL3     | ENST00000373387 | p.K1013N | c.3039G>C  | Unverified | TTG | AAG | TAA | 3 | G | C |
| TCGA-04-1338 | GART       | ENST00000381839 | p.G475R  | c.1423G>C  | Verified   | GCT | GGT | CTT | 1 | G | C |
| TCGA-13-0920 | GBF1       | ENST00000369983 | p.L143L  | c.429G>C   | Verified   | ACT | CTG | CTG | 3 | G | C |
| TCGA-24-1846 | GFI1       | ENST00000294702 | p.A47A   | c.141G>C   | Unverified | GGG | GCG | AAG | 3 | G | C |
| TCGA-29-1701 | GFOD1      | ENST00000379287 | p.A101P  | c.301G>C   | Unverified | GAC | GCT | TTC | 1 | G | C |
| TCGA-23-1031 | GGNBP2     | ENST00000304718 | p.D579H  | c.1735G>C  | Verified   | AAA | GAT | ACA | 1 | G | C |
| TCGA-24-2280 | GHR        | ENST00000230882 | p.C390S  | c.1169G>C  | Unverified | tgt | tgt | gaa | 2 | G | C |
| TCGA-29-1763 | GIGYF2     | ENST00000373563 | p.G276G  | c.828G>C   | Unverified | AGT | GGG | AGC | 3 | G | C |
| TCGA-29-1763 | GIGYF2_ENS | ENST00000409451 | p.G298G  | c.894G>C   | Unverified | AGT | GGG | AGC | 3 | G | C |
| TCGA-23-1111 | GIMAP2     | ENST00000223293 | p.V95L   | c.283G>C   | Unverified | GAG | GTG | CAG | 1 | G | C |
| TCGA-23-1124 | GIN51      | ENST00000262460 | p.G133R  | c.397G>C   | Verified   | GAA | GGT | TTG | 1 | G | C |
| TCGA-09-0369 | GJA1       | ENST00000282561 | p.V289L  | c.865G>C   | Verified   | CTG | GTT | ACT | 1 | G | C |
| TCGA-09-0369 | GJA1       | ENST00000282561 | p.V289L  | c.865G>C   | Verified   | CTG | GTT | ACT | 1 | G | C |
| TCGA-30-1855 | GJA10      | ENST00000369352 | p.W78C   | c.234G>C   | Unverified | TTC | TGG | GTT | 3 | G | C |
| TCGA-30-1855 | GLB1L      | ENST00000295759 | p.E184D  | c.552G>C   | Unverified | GTG | GAG | AAT | 3 | G | C |
| TCGA-13-0807 | GLDC       | ENST00000321612 | p.A498P  | c.1492G>C  | Verified   | GTT | GCT | GAA | 1 | G | C |
| TCGA-13-1510 | GLIPR1L2   | ENST00000320460 | p.A88P   | c.262G>C   | Unverified | ACT | GCT | AGA | 1 | G | C |
| TCGA-13-0906 | GLRA3      | ENST00000274093 | p.D45H   | c.133G>C   | Verified   | TCT | GAT | TTT | 1 | G | C |
| TCGA-23-1110 | GMPR2      | ENST00000399440 | p.V295L  | c.883G>C   | Verified   | GAA | GTT | CCT | 1 | G | C |
| TCGA-24-0975 | GMPR2      | ENST00000399440 | p.G242R  | c.724G>C   | Verified   | CTG | GGT | GGC | 1 | G | C |
| TCGA-61-1998 | GMPR2      | ENST00000399440 | p.?      | c.547+1G>C | Verified   | CCA | GGC | TCT | 1 | G | C |
| TCGA-24-1469 | GNAL       | ENST00000334049 | p.S413T  | c.1238G>C  | Verified   | ATC | AGC | ACG | 2 | G | C |
| TCGA-23-1116 | GNG13      | ENST00000248150 | p.Q8H    | c.24G>C    | Unverified | CCA | CAG | ATG | 3 | G | C |
| TCGA-13-1497 | GOLGA3     | ENST00000204726 | p.M687I  | c.2061G>C  | Verified   | AGG | ATG | GCG | 3 | G | C |
| TCGA-24-1844 | GOLGA4     | ENST00000361924 | p.S1308T | c.3923G>C  | Unverified | AAG | AGC | ATG | 2 | G | C |
| TCGA-09-2050 | GOLGA5     | ENST00000163416 | p.E476Q  | c.1426G>C  | Verified   | AAA | GAG | ATG | 1 | G | C |
| TCGA-13-0761 | GPNMB      | ENST00000381990 | p.W168S  | c.503G>C   | Verified   | GGA | TGG | AGA | 2 | G | C |



|              |           |                 |          |             |            |     |     |     |   |   |   |
|--------------|-----------|-----------------|----------|-------------|------------|-----|-----|-----|---|---|---|
| TCGA-13-0761 | GPNMB     | ENST00000381990 | p.W168S  | c.503G>C    | Verified   | GGA | TGG | AGA | 2 | G | C |
| TCGA-61-2102 | GPR110    | ENST00000371253 | p.V215L  | c.643G>C    | Verified   | GTT | GTT | GGC | 1 | G | C |
| TCGA-13-1501 | GPR124    | ENST00000412232 | p.G392G  | c.1176G>C   | Unverified | GGC | GGG | GGT | 3 | G | C |
| TCGA-13-1501 | GPR124    | ENST00000412232 | p.G392G  | c.1176G>C   | Unverified | GGC | GGG | GGT | 3 | G | C |
| TCGA-30-1718 | GPR15     | ENST00000284311 | p.W89C   | c.267G>C    | Unverified | CTC | TGG | GTG | 3 | G | C |
| TCGA-29-1761 | GPR155    | ENST00000392551 | p.E8Q    | c.22G>C     | Unverified | GCA | GAG | AAC | 1 | G | C |
| TCGA-61-1725 | GPR160    | ENST00000355897 | p.R212T  | c.635G>C    | Unverified | ATC | AGG | ATA | 2 | G | C |
| TCGA-24-1423 | GPR179    | ENST00000342292 | p.C387S  | c.1160G>C   | Unverified | GCC | TGC | CAG | 2 | G | C |
| TCGA-23-1022 | GPR55     | ENST00000392039 | p.A230P  | c.688G>C    | Verified   | GCA | GCC | AGC | 1 | G | C |
| TCGA-04-1361 | GPR98     | ENST00000405460 | p.E3975Q | c.11923G>C  | Verified   | CTT | GAA | TTT | 1 | G | C |
| TCGA-04-1361 | GPR98     | ENST00000405460 | p.E3975Q | c.11923G>C  | Verified   | CTT | GAA | TTT | 1 | G | C |
| TCGA-13-0795 | GPR98     | ENST00000405460 | p.R3405P | c.10214G>C  | Verified   | GTC | CGA | GGT | 2 | G | C |
| TCGA-24-2024 | GRB2      | ENST00000392564 | p.E130D  | c.390G>C    | Verified   | aat | gag | ctg | 3 | G | C |
| TCGA-24-2288 | GRIA4     | ENST00000282499 | p.A699P  | c.2095G>C   | Unverified | TCA | GCA | GAG | 1 | G | C |
| TCGA-09-2050 | GRIN2D    | ENST00000263269 | p.?      | c.1200+1G>C | Verified   | GAG | GTG | GTG | 3 | G | C |
| TCGA-09-2050 | GRK7      | ENST00000264952 | p.G352A  | c.1055G>C   | Verified   | gct | gga | acc | 2 | G | C |
| TCGA-24-1604 | GRM1      | ENST00000282753 | p.D87H   | c.259G>C    | Verified   | TTG | GAT | AAG | 1 | G | C |
| TCGA-13-0755 | GRPEL2    | ENST00000329271 | p.E47Q   | c.139G>C    | Verified   | TCT | GAG | GAC | 1 | G | C |
| TCGA-25-2391 | GSK3B_ENS | ENST00000316626 | p.E121D  | c.363G>C    | Unverified | GGT | GAG | AAG | 3 | G | C |
| TCGA-24-2288 | GSR       | ENST00000221130 | p.V266L  | c.796G>C    | Verified   | AAG | GTA | CTT | 1 | G | C |
| TCGA-24-1563 | GSTA1     | ENST00000334575 | p.G144R  | c.430G>C    | Verified   | CAT | GGA | CAA | 1 | G | C |
| TCGA-23-2078 | GTPBP1    | ENST00000216044 | p.A140P  | c.418G>C    | Unverified | GAA | GCT | GGG | 1 | G | C |
| TCGA-13-0913 | H2AFJ     | ENST00000389078 | p.E93D   | c.279G>C    | Verified   | GAG | GAG | TTA | 3 | G | C |
| TCGA-13-1498 | HACE1     | ENST00000262903 | p.V741L  | c.2221G>C   | Verified   | TAC | GTC | CAG | 1 | G | C |
| TCGA-30-1891 | HAP1      | ENST00000347901 | p.M400I  | c.1200G>C   | Unverified | CGG | ATG | TAT | 3 | G | C |
| TCGA-61-1725 | HBXIP     | ENST00000256644 | p.R51P   | c.152G>C    | Unverified | TTA | CGG | TCC | 2 | G | C |
| TCGA-23-1122 | HDAC1     | ENST00000373548 | p.G25A   | c.74G>C     | Verified   | tat | gga | caa | 2 | G | C |
| TCGA-24-1469 | HDAC3     | ENST00000305264 | p.G176R  | c.526G>C    | Unverified | GAC | GGG | GTT | 1 | G | C |
| TCGA-09-2049 | HDDC3     | ENST00000330334 | p.D122H  | c.364G>C    | Verified   | GCA | GAC | AAG | 1 | G | C |
| TCGA-29-1691 | HEATR1    | ENST00000366582 | p.E642Q  | c.1924G>C   | Unverified | GAA | GAA | GCT | 1 | G | C |
| TCGA-23-1022 | HEATR5A   | ENST00000389961 | p.D378H  | c.1132G>C   | Verified   | AAG | GAT | ATT | 1 | G | C |
| TCGA-23-2077 | HEATR7B2  | ENST00000399564 | p.A528P  | c.1582G>C   | Verified   | GGG | GCT | GGT | 1 | G | C |
| TCGA-24-1843 | HECW2     | ENST00000260983 | p.R1487T | c.4460G>C   | Unverified | gaa | aga | ttc | 2 | G | C |
| TCGA-25-1326 | HECW2     | ENST00000260983 | p.Q365H  | c.1095G>C   | Verified   | agc | cag | gtg | 3 | G | C |

|              |            |                     |          |           |            |     |     |     |   |   |   |
|--------------|------------|---------------------|----------|-----------|------------|-----|-----|-----|---|---|---|
| TCGA-29-1761 | HEPHL1     | ENST00000315765     | p.W184C  | c.552G>C  | Unverified | ACC | TGG | GTG | 3 | G | C |
| TCGA-61-1740 | HERC2      | NM_004667.3         | p.G635G  | c.1905G>C | Unverified | tat | ggg | aaa | 3 | G | C |
| TCGA-24-1469 | HEXB       | ENST00000261416     | p.G418R  | c.1252G>C | Verified   | CCG | GGC | ACA | 1 | G | C |
| TCGA-13-0760 | HEXDC      | ENST00000337014     | p.A128P  | c.382G>C  | Verified   | GGC | GCC | ATG | 1 | G | C |
| TCGA-25-1313 | HIST1H1C   | ENST00000343677     | p.K109N  | c.327G>C  | Unverified | aac | aag | aag | 3 | G | C |
| TCGA-25-2392 | HIST1H2AM  | ENST00000359611     | p.Q7H    | c.21G>C   | Verified   | AAG | CAG | GGC | 3 | G | C |
| TCGA-61-1725 | HIST1H2BB  | ENST00000357905     | p.K25N   | c.75G>C   | Unverified | AAG | AAG | GAT | 3 | G | C |
| TCGA-13-0905 | HIST1H2BH  | ENST00000356350     | p.G61G   | c.183G>C  | Verified   | ATG | GGG | ATC | 3 | G | C |
| TCGA-04-1336 | HIST1H3B   | ENST00000244661     | p.E51Q   | c.151G>C  | Verified   | CGC | GAG | ATC | 1 | G | C |
| TCGA-61-1900 | HIST1H4C   | ENST00000377803     | p.G42R   | c.124G>C  | Unverified | CGC | GGT | GGC | 1 | G | C |
| TCGA-13-0885 | HIST2H2BE  | ENST00000369155     | p.E77Q   | c.229G>C  | Verified   | GGA | GAG | GCT | 1 | G | C |
| TCGA-24-1849 | HLCS       | ENST00000399120     | p.D208H  | c.622G>C  | Unverified | AGA | GAC | CCG | 1 | G | C |
| TCGA-24-1847 | HMGB1P1    | ENST00000243919     | p.R24P   | c.71G>C   | Unverified | TGT | CGG | GAG | 2 | G | C |
| TCGA-24-1431 | HMHA1      | ENST00000313093     | p.C528S  | c.1583G>C | Unverified | CTG | TGT | GAG | 2 | G | C |
| TCGA-24-1104 | HOXA1      | ENST00000343060     | p.S16T   | c.47G>C   | Verified   | CTT | AGC | AGT | 2 | G | C |
| TCGA-23-1032 | HOXA11     | ENST00000006015     | p.D141H  | c.421G>C  | Unverified | TTC | GAC | CAG | 1 | G | C |
| TCGA-24-1464 | HOXC4      | ENST00000303406     | p.G74R   | c.220G>C  | Verified   | CAG | GGG | CCC | 1 | G | C |
| TCGA-61-1737 | HOXD10     | ENST00000249501     | p.E220Q  | c.658G>C  | Unverified | CCC | GAG | GCC | 1 | G | C |
| TCGA-24-2280 | HPCA       | ENST00000373467     | p.E120Q  | c.358G>C  | Unverified | GAG | GAG | ATG | 1 | G | C |
| TCGA-29-1781 | HPDL       | ENST00000334815     | p.E271Q  | c.811G>C  | Unverified | ACT | GAG | GGG | 1 | G | C |
| TCGA-29-1762 | HPS6       | ENST00000299238     | p.L335L  | c.1005G>C | Unverified | CTG | CTG | GAC | 3 | G | C |
| TCGA-61-1740 | HPX        | ENST00000265983     | p.V46V   | c.138G>C  | Unverified | GAC | GTG | ACT | 3 | G | C |
| TCGA-13-0893 | HRH2       | ENST00000231683     | p.L80L   | c.240G>C  | Verified   | CAG | CTG | TCC | 3 | G | C |
| TCGA-24-1850 | HRNR       | ENST00000368801     | p.G933R  | c.2797G>C | Unverified | TTT | GGT | CAC | 1 | G | C |
| TCGA-25-2391 | HSF5       | ENST00000323777     | p.S199T  | c.596G>C  | Unverified | GAT | AGT | TTG | 2 | G | C |
| TCGA-30-1718 | HSPA12B    | ENST00000254963     | p.R202P  | c.605G>C  | Unverified | gtg | cgc | tgg | 2 | G | C |
| TCGA-23-2077 | HSPG2      | ENST00000374695     | p.G2355A | c.7064G>C | Unverified | GAA | GGG | CAG | 2 | G | C |
| TCGA-29-1696 | HTATSF1    | ENST00000535601     | p.E665Q  | c.1993G>C | Unverified | gaa | gaa | ggt | 1 | G | C |
| TCGA-29-1696 | HTATSF1    | ENST00000535601     | p.E665Q  | c.1993G>C | Unverified | gaa | gaa | ggt | 1 | G | C |
| TCGA-13-0885 | HTATSF1    | ENST00000535601     | p.G3A    | c.8G>C    | Verified   | agc | ggc | acc | 2 | G | C |
| TCGA-23-1031 | HTR1E      | ENST00000369584     | p.G91R   | c.271G>C  | Verified   | CTT | GGG | TAC | 1 | G | C |
| TCGA-29-1691 | HTR2A      | ENST00000378688     | p.E455D  | c.1365G>C | Unverified | GAA | GAG | GCT | 3 | G | C |
| TCGA-13-0885 | HUWE1      | XM_497119.1         | p.L3002L | c.9006G>C | Verified   | cgt | ctg | ttt | 3 | G | C |
| TCGA-30-1855 | HYDIN_ENS1 | ENST00000316490_v65 | p.E1326Q | c.3976G>C | Unverified | ATA | GAA | GAA | 1 | G | C |

|              |             |                 |          |            |            |     |     |     |   |   |   |
|--------------|-------------|-----------------|----------|------------|------------|-----|-----|-----|---|---|---|
| TCGA-24-1423 | ICT1        | ENST00000301585 | p.R129S  | c.387G>C   | Verified   | AAC | AGG | TTA | 3 | G | C |
| TCGA-13-1408 | IFRD2       | ENST00000336089 | p.V247L  | c.739G>C   | Verified   | TAT | GTG | GAC | 1 | G | C |
| TCGA-29-1770 | IFT140      | ENST00000426508 | p.G471R  | c.1411G>C  | Unverified | TCT | GGA | GCC | 1 | G | C |
| TCGA-23-1110 | IGSF22      | ENST00000319338 | p.?      | c.811-1G>C | Verified   | AAG | GGT | ACT | 1 | G | C |
| TCGA-24-1470 | IGSF22      | ENST00000319338 | p.V124L  | c.370G>C   | Verified   | CAC | GTG | CTG | 1 | G | C |
| TCGA-13-1497 | IGSF22      | ENST00000319338 | p.E474D  | c.1422G>C  | Verified   | GCA | GAG | CTG | 3 | G | C |
| TCGA-61-2012 | IGSF3       | ENST00000369486 | p.R1054P | c.3161G>C  | Unverified | CTT | CGC | TTC | 2 | G | C |
| TCGA-13-1510 | IL10RA      | ENST00000227752 | p.E168D  | c.504G>C   | Unverified | TAT | GAG | ATT | 3 | G | C |
| TCGA-29-1762 | IL1RAPL1    | ENST00000378993 | p.G272A  | c.815G>C   | Unverified | TTT | GGG | TAC | 2 | G | C |
| TCGA-29-1762 | IL1RAPL1_EI | ENST00000378993 | p.G272A  | c.815G>C   | Unverified | TTT | GGG | TAC | 2 | G | C |
| TCGA-25-2391 | IL37        | ENST00000263326 | p.E185Q  | c.553G>C   | Unverified | AAT | GAG | CCT | 1 | G | C |
| TCGA-24-1563 | ILKAP       | ENST00000254654 | p.L241F  | c.723G>C   | Verified   | ATC | TTG | TGT | 3 | G | C |
| TCGA-13-1489 | INHA        | ENST00000243786 | p.C291S  | c.872G>C   | Verified   | TAC | TGT | CAT | 2 | G | C |
| TCGA-29-1696 | INO80       | ENST00000361937 | p.E760D  | c.2280G>C  | Unverified | ATT | GAG | ATT | 3 | G | C |
| TCGA-29-1696 | INO80       | ENST00000361937 | p.E760D  | c.2280G>C  | Unverified | ATT | GAG | ATT | 3 | G | C |
| TCGA-29-1696 | INOC1       | ENST00000361937 | p.E760D  | c.2280G>C  | Unverified | att | gag | att | 3 | G | C |
| TCGA-29-1696 | INOC1       | ENST00000361937 | p.E760D  | c.2280G>C  | Unverified | att | gag | att | 3 | G | C |
| TCGA-13-0761 | INPP5D_ENS  | ENST00000359570 | p.S33T   | c.98G>C    | Verified   | GCC | AGC | GAG | 2 | G | C |
| TCGA-13-0761 | INPP5D_ENS  | ENST00000359570 | p.S33T   | c.98G>C    | Verified   | GCC | AGC | GAG | 2 | G | C |
| TCGA-04-1356 | INSRR       | ENST00000368195 | p.V139L  | c.415G>C   | Unverified | GCT | GTG | CGT | 1 | G | C |
| TCGA-04-1356 | INSRR_ENST  | ENST00000368195 | p.V139L  | c.415G>C   | Unverified | GCT | GTG | CGT | 1 | G | C |
| TCGA-24-1470 | INTS3       | ENST00000318967 | p.W802C  | c.2406G>C  | Verified   | GAC | TGG | GAG | 3 | G | C |
| TCGA-61-1915 | INTS5       | ENST00000330574 | p.L941L  | c.2823G>C  | Unverified | CGT | CTG | CTG | 3 | G | C |
| TCGA-29-1777 | IQCC        | ENST00000291358 | p.R326T  | c.977G>C   | Unverified | CCC | AGA | GGT | 2 | G | C |
| TCGA-61-2102 | IQGAP2      | ENST00000274364 | p.G1466A | c.4397G>C  | Verified   | GAT | GGA | AAA | 2 | G | C |
| TCGA-61-1733 | IQGAP3      | ENST00000361170 | p.R1630P | c.4889G>C  | Unverified | TTG | CGG | AAG | 2 | G | C |
| TCGA-61-1733 | IQGAP3      | ENST00000361170 | p.R1630P | c.4889G>C  | Unverified | TTG | CGG | AAG | 2 | G | C |
| TCGA-04-1338 | IRF6        | ENST00000367021 | p.D225H  | c.673G>C   | Verified   | ACT | GAC | CTG | 1 | G | C |
| TCGA-36-1577 | IRS4        | ENST00000372129 | p.V1047L | c.3139G>C  | Unverified | tat | gtg | gtc | 1 | G | C |
| TCGA-24-1463 | IRX3        | ENST00000329734 | p.E230Q  | c.688G>C   | Unverified | GAG | GAG | GAG | 1 | G | C |
| TCGA-29-1699 | ITGA1       | ENST00000282588 | p.G483A  | c.1448G>C  | Unverified | agt | gga | gaa | 2 | G | C |
| TCGA-24-1463 | ITGA10      | ENST00000369304 | p.V654L  | c.1960G>C  | Verified   | GAG | GTG | ACC | 1 | G | C |
| TCGA-61-1915 | ITGA2       | NM_002203.2     | p.V874L  | c.2620G>C  | Unverified | tct | gtt | gcc | 1 | G | C |
| TCGA-61-1915 | ITGA2_ENST  | ENST00000296585 | p.V874L  | c.2620G>C  | Unverified | TCT | GTT | GCC | 1 | G | C |

|              |            |                 |          |           |            |     |     |     |   |   |   |
|--------------|------------|-----------------|----------|-----------|------------|-----|-----|-----|---|---|---|
| TCGA-29-1777 | ITGA2B     | ENST00000262407 | p.G823A  | c.2468G>C | Unverified | cct | ggg | act | 2 | G | C |
| TCGA-20-0990 | ITGAV      | ENST00000261023 | p.V347L  | c.1039G>C | Verified   | TCA | GTG | TCT | 1 | G | C |
| TCGA-04-1367 | ITGB2      | ENST00000397852 | p.D300H  | c.898G>C  | Verified   | TTC | GAC | TAC | 1 | G | C |
| TCGA-29-1776 | ITGB4      | ENST00000200181 | p.E597Q  | c.1789G>C | Unverified | tgt | gag | tgt | 1 | G | C |
| TCGA-23-1032 | ITIH5      | ENST00000256861 | p.A532P  | c.1594G>C | Verified   | ACC | GCC | AGC | 1 | G | C |
| TCGA-13-1505 | ITK        | ENST00000422843 | p.A261P  | c.781G>C  | Verified   | GGA | GCC | TTC | 1 | G | C |
| TCGA-25-1318 | ITPR1      | ENST00000456211 | p.K2409N | c.7227G>C | Unverified | TTC | AAG | GAT | 3 | G | C |
| TCGA-25-1318 | ITPR1      | ENST00000456211 | p.K2409N | c.7227G>C | Unverified | TTC | AAG | GAT | 3 | G | C |
| TCGA-61-2109 | ITSN1      | ENST00000381318 | p.G1195A | c.3584G>C | Unverified | AAA | GGA | GAA | 2 | G | C |
| TCGA-24-1464 | IVNS1ABP   | ENST00000367498 | p.G600G  | c.1800G>C | Verified   | GCT | GGG | ATT | 3 | G | C |
| TCGA-13-0904 | JAKMIP2    | ENST00000265272 | p.Q34H   | c.102G>C  | Verified   | ATT | CAG | ATA | 3 | G | C |
| TCGA-24-2289 | JMJD7-PLA2 | ENST00000382448 | p.S627T  | c.1880G>C | Unverified | CCA | AGC | TGC | 2 | G | C |
| TCGA-61-2109 | KALRN      | ENST00000240874 | p.R817R  | c.2451G>C | Unverified | GAA | CGG | AAG | 3 | G | C |
| TCGA-24-1847 | KANK1      | ENST00000382293 | p.E770Q  | c.2308G>C | Unverified | CAA | GAA | GTG | 1 | G | C |
| TCGA-24-1847 | KANK1_ENS  | ENST00000382303 | p.E928Q  | c.2782G>C | Unverified | CAA | GAA | GTG | 1 | G | C |
| TCGA-24-1417 | KBTBD7     | ENST00000379483 | p.W578S  | c.1733G>C | Unverified | CAA | TGG | AAA | 2 | G | C |
| TCGA-25-2401 | KCNA1      | ENST00000382545 | p.G6R    | c.16G>C   | Unverified | TCT | GGG | GAG | 1 | G | C |
| TCGA-23-1117 | KCNA10     | ENST00000369771 | p.G39R   | c.115G>C  | Verified   | AAA | GGC | CGG | 1 | G | C |
| TCGA-23-1117 | KCNA10     | ENST00000369771 | p.G39R   | c.115G>C  | Verified   | AAA | GGC | CGG | 1 | G | C |
| TCGA-13-0890 | KCNA10     | ENST00000369771 | p.S222S  | c.666G>C  | Verified   | GTC | TCG | GTG | 3 | G | C |
| TCGA-13-0887 | KCNA2      | ENST00000316361 | p.E279Q  | c.835G>C  | Verified   | CCA | GAG | GAC | 1 | G | C |
| TCGA-20-1683 | KCNA6      | ENST00000280684 | p.G205R  | c.613G>C  | Unverified | CGA | GGT | GGA | 1 | G | C |
| TCGA-24-1849 | KCNH8      | ENST00000328405 | p.L186F  | c.558G>C  | Unverified | AAA | TTG | AAA | 3 | G | C |
| TCGA-61-1907 | KCNK10     | ENST00000340700 | p.E332D  | c.996G>C  | Unverified | GAA | GAG | GTG | 3 | G | C |
| TCGA-61-1907 | KCNK10_EN  | ENST00000312350 | p.E337D  | c.1011G>C | Unverified | GAA | GAG | GTG | 3 | G | C |
| TCGA-61-1907 | KCNK10_EN  | ENST00000319231 | p.E337D  | c.1011G>C | Unverified | GAA | GAG | GTG | 3 | G | C |
| TCGA-04-1342 | KCNQ1      | ENST00000155840 | p.A607P  | c.1819G>C | Unverified | CTG | GCA | CTC | 1 | G | C |
| TCGA-10-0930 | KCNQ5      | ENST00000370398 | p.A351P  | c.1051G>C | Verified   | TTT | GCA | TTA | 1 | G | C |
| TCGA-10-0930 | KCNQ5      | ENST00000370398 | p.A351P  | c.1051G>C | Verified   | TTT | GCA | TTA | 1 | G | C |
| TCGA-29-1766 | KCNV2      | ENST00000382082 | p.R180P  | c.539G>C  | Unverified | CGC | CGC | TTC | 2 | G | C |
| TCGA-13-0916 | KCTD7      | ENST00000275532 | p.V272V  | c.816G>C  | Verified   | CTC | GTG | AAC | 3 | G | C |
| TCGA-23-1029 | KDM4D      | ENST00000335080 | p.S430T  | c.1289G>C | Unverified | ccc | agc | tca | 2 | G | C |
| TCGA-24-1604 | KDM5C      | ENST00000375401 | p.E23Q   | c.67G>C   | Unverified | GCC | GAG | TTC | 1 | G | C |
| TCGA-09-1674 | KHDRBS2    | ENST00000281156 | p.L127F  | c.381G>C  | Unverified | CAC | TTG | AGT | 3 | G | C |

|              |            |                     |          |             |            |     |     |     |   |   |   |
|--------------|------------|---------------------|----------|-------------|------------|-----|-----|-----|---|---|---|
| TCGA-24-1104 | KIAA0020   | ENST00000397885     | p.R181P  | c.542G>C    | Verified   | ACT | CGT | GTG | 2 | G | C |
| TCGA-23-1022 | KIAA0528   | ENST00000333957     | p.D819H  | c.2455G>C   | Verified   | ACA | GAT | AAT | 1 | G | C |
| TCGA-29-1705 | KIAA0889   | ENST00000237536     | p.G966A  | c.2897G>C   | Unverified | ACG | GGG | GAC | 2 | G | C |
| TCGA-29-1705 | KIAA0889_E | ENST00000279034     | p.G728A  | c.2183G>C   | Unverified | ACG | GGG | GAC | 2 | G | C |
| TCGA-13-1496 | KIAA0913_E | ENST00000398706     | p.D1150H | c.3448G>C   | Unverified | ATT | GAC | AGC | 1 | G | C |
| TCGA-13-1496 | KIAA0913_E | ENST00000412131     | p.D1145H | c.3433G>C   | Unverified | ATT | GAC | AGC | 1 | G | C |
| TCGA-04-1655 | KIAA1109   | ENST00000264501     | p.E1817Q | c.5449G>C   | Unverified | AAA | GAA | ATT | 1 | G | C |
| TCGA-29-1691 | KIAA1109   | ENST00000264501     | p.G3163R | c.9487G>C   | Unverified | AAG | GGT | ATT | 1 | G | C |
| TCGA-29-2427 | KIAA1109   | ENST00000264501     | p.E726Q  | c.2176G>C   | Verified   | GTA | GAA | ATG | 1 | G | C |
| TCGA-61-1737 | KIAA1109   | ENST00000264501     | p.M3054I | c.9162G>C   | Unverified | ACC | ATG | TCA | 3 | G | C |
| TCGA-29-1693 | KIAA1211   | ENST00000264229     | p.L676L  | c.2028G>C   | Unverified | ATC | CTG | AAG | 3 | G | C |
| TCGA-09-1674 | KIAA1383   | ENST00000418460     | p.R669T  | c.2006G>C   | Unverified | AAA | AGA | CAA | 2 | G | C |
| TCGA-09-1674 | KIAA1383_E | ENST00000418460     | p.R669T  | c.2006G>C   | Unverified | AAA | AGA | CAA | 2 | G | C |
| TCGA-61-2008 | KIAA1409   | ENST00000256339     | p.G1847R | c.5539G>C   | Verified   | CTT | GGG | CTA | 1 | G | C |
| TCGA-24-2024 | KIAA1524   | ENST00000295746     | p.R530T  | c.1589G>C   | Verified   | CTG | AGA | ATA | 2 | G | C |
| TCGA-04-1343 | KIAA1529   | ENST00000375206     | p.?      | c.1797+1G>C | Verified   | TGT | AAG | AAG | 3 | G | C |
| TCGA-23-1124 | KIAA1984   | ENST00000338005     | p.K192N  | c.576G>C    | Verified   | GAC | AAG | CTG | 3 | G | C |
| TCGA-29-1764 | KIAA2026_E | ENST00000399933_v61 | p.D1077H | c.3229G>C   | Unverified | ATA | GAT | CTT | 1 | G | C |
| TCGA-13-1488 | KIF13A     | ENST00000259711     | p.R1097T | c.3290G>C   | Verified   | GAG | AGG | TGG | 2 | G | C |
| TCGA-24-2289 | KIF17      | ENST00000247986     | p.Q387H  | c.1161G>C   | Unverified | GTG | CAG | GTG | 3 | G | C |
| TCGA-61-2008 | KIF21B     | ENST00000332129     | p.K373N  | c.1119G>C   | Verified   | AAC | AAG | GTG | 3 | G | C |
| TCGA-13-0885 | KIF26B     | ENST00000407071     | p.K441N  | c.1323G>C   | Verified   | AAC | AAG | GTG | 3 | G | C |
| TCGA-23-1031 | KIF2B      | ENST00000268919     | p.Q430H  | c.1290G>C   | Verified   | TTC | CAG | ATC | 3 | G | C |
| TCGA-13-0760 | KIF3B      | ENST00000375712     | p.R507T  | c.1520G>C   | Verified   | GAA | AGA | GAA | 2 | G | C |
| TCGA-29-1777 | KIF3C      | ENST00000264712     | p.E166Q  | c.496G>C    | Unverified | CTA | GAG | CTG | 1 | G | C |
| TCGA-61-1737 | KIFC1      | ENST00000428849     | p.E294Q  | c.880G>C    | Unverified | CTA | GAA | ATG | 1 | G | C |
| TCGA-25-2401 | KLC4       | ENST00000394056     | p.W425C  | c.1275G>C   | Verified   | ATC | TGG | ATG | 3 | G | C |
| TCGA-25-2391 | KLHDC6     | ENST00000405256     | p.R288T  | c.863G>C    | Unverified | ATC | AGA | TCA | 2 | G | C |
| TCGA-13-0795 | KLHL10     | ENST00000293303     | p.D268H  | c.802G>C    | Verified   | TAT | GAC | CTC | 1 | G | C |
| TCGA-29-1696 | KRAS       | ENST00000311936     | p.G12R   | c.34G>C     | Unverified | gct | ggt | ggc | 1 | G | C |
| TCGA-29-1696 | KRAS       | ENST00000311936     | p.G12R   | c.34G>C     | Unverified | gct | ggt | ggc | 1 | G | C |
| TCGA-29-1696 | KRAS_ENSTC | ENST00000256078     | p.G12R   | c.34G>C     | Unverified | GCT | GGT | GGC | 1 | G | C |
| TCGA-29-1696 | KRAS_ENSTC | ENST00000256078     | p.G12R   | c.34G>C     | Unverified | GCT | GGT | GGC | 1 | G | C |
| TCGA-25-1313 | KRBA1      | ENST00000255992     | p.G145A  | c.434G>C    | Verified   | ACT | GGT | GAC | 2 | G | C |

|              |            |                 |          |            |            |     |     |     |   |   |   |
|--------------|------------|-----------------|----------|------------|------------|-----|-----|-----|---|---|---|
| TCGA-29-1785 | KRT10      | ENST00000269576 | p.Q357H  | c.1071G>C  | Unverified | GAA | CAG | ATA | 3 | G | C |
| TCGA-29-1785 | KRT10      | ENST00000269576 | p.Q357H  | c.1071G>C  | Unverified | GAA | CAG | ATA | 3 | G | C |
| TCGA-30-1891 | KRT12      | ENST00000251643 | p.L384L  | c.1152G>C  | Unverified | CAG | CTG | TCC | 3 | G | C |
| TCGA-30-1855 | KRT3       | ENST00000417996 | p.K437N  | c.1311G>C  | Unverified | AAG | AAG | CAG | 3 | G | C |
| TCGA-23-1032 | KRT31      | ENST00000251645 | p.A34P   | c.100G>C   | Unverified | GGG | GCC | TGC | 1 | G | C |
| TCGA-23-1032 | KRT31_ENST | ENST00000251645 | p.A34P   | c.100G>C   | Unverified | GGG | GCC | TGC | 1 | G | C |
| TCGA-13-0884 | KRT6B      | ENST00000252252 | p.S76T   | c.227G>C   | Verified   | GGC | AGC | TGT | 2 | G | C |
| TCGA-29-1783 | KRT73      | ENST00000305748 | p.R55R   | c.165G>C   | Unverified | GCC | CGG | AGC | 3 | G | C |
| TCGA-23-1120 | KRT77      | ENST00000341809 | p.G135A  | c.404G>C   | Verified   | GGG | GGC | ATC | 2 | G | C |
| TCGA-20-1685 | KRT83      | ENST00000293670 | p.C222S  | c.665G>C   | Unverified | GAC | TGC | GCC | 2 | G | C |
| TCGA-29-1695 | KRT86      | ENST00000293525 | p.A11P   | c.31G>C    | Unverified | CGC | GCC | TTC | 1 | G | C |
| TCGA-04-1651 | KRT9       | ENST00000246662 | p.K390N  | c.1170G>C  | Unverified | AGC | AAG | AAA | 3 | G | C |
| TCGA-04-1651 | KRT9       | ENST00000246662 | p.K390N  | c.1170G>C  | Unverified | AGC | AAG | AAA | 3 | G | C |
| TCGA-24-1843 | KRTAP10-5  | ENST00000400372 | p.C188S  | c.563G>C   | Unverified | TGC | TGT | GTG | 2 | G | C |
| TCGA-29-1696 | KRTAP26-1  | ENST00000360542 | p.S167T  | c.500G>C   | Unverified | TCG | AGT | TGC | 2 | G | C |
| TCGA-29-1696 | KRTAP26-1  | ENST00000360542 | p.S167T  | c.500G>C   | Unverified | TCG | AGT | TGC | 2 | G | C |
| TCGA-24-1843 | KRTAP4-6   | ENST00000345847 | p.Q128H  | c.384G>C   | Unverified | TCC | CAG | TGC | 3 | G | C |
| TCGA-61-1740 | KRTAP9-1   | ENST00000398470 | p.R226T  | c.677G>C   | Unverified | TAC | AGG | ACC | 2 | G | C |
| TCGA-61-1740 | KRTAP9-1_E | ENST00000398470 | p.R226T  | c.677G>C   | Unverified | TAC | AGG | ACC | 2 | G | C |
| TCGA-61-2009 | KRTAP9-8   | ENST00000254072 | p.C116S  | c.347G>C   | Verified   | GGT | TGC | CTA | 2 | G | C |
| TCGA-61-1738 | KYNU       | ENST00000264170 | p.D250H  | c.748G>C   | Unverified | TTT | GAT | CTA | 1 | G | C |
| TCGA-61-1738 | KYNU       | ENST00000264170 | p.D250H  | c.748G>C   | Unverified | TTT | GAT | CTA | 1 | G | C |
| TCGA-61-1738 | KYNU_ENST  | ENST00000375773 | p.D250H  | c.748G>C   | Unverified | TTT | GAT | CTA | 1 | G | C |
| TCGA-61-1738 | KYNU_ENST  | ENST00000375773 | p.D250H  | c.748G>C   | Unverified | TTT | GAT | CTA | 1 | G | C |
| TCGA-61-1998 | L2HGDH     | ENST00000267436 | p.A62P   | c.184G>C   | Verified   | CTT | GCC | TCT | 1 | G | C |
| TCGA-25-1318 | LAMA1      | ENST00000389658 | p.W2285S | c.6854G>C  | Unverified | CTA | TGG | AAC | 2 | G | C |
| TCGA-25-1318 | LAMA1      | ENST00000389658 | p.W2285S | c.6854G>C  | Unverified | CTA | TGG | AAC | 2 | G | C |
| TCGA-09-0369 | LAMB4      | ENST00000205386 | p.V1494L | c.4480G>C  | Verified   | AAC | GTG | CCT | 1 | G | C |
| TCGA-09-0369 | LAMB4      | ENST00000205386 | p.V1494L | c.4480G>C  | Verified   | AAC | GTG | CCT | 1 | G | C |
| TCGA-13-0890 | LAMP3      | ENST00000265598 | p.?      | c.760-1G>C | Verified   | TCG | GTT | TTT | 1 | G | C |
| TCGA-61-1900 | LAS1L      | ENST00000374811 | p.C186S  | c.557G>C   | Unverified | tgg | tgc | cgc | 2 | G | C |
| TCGA-24-1435 | LAS1L      | ENST00000374811 | p.T395T  | c.1185G>C  | Verified   | ttc | acg | cag | 3 | G | C |
| TCGA-04-1331 | LATS1_ENST | ENST00000253339 | p.R1020T | c.3059G>C  | Verified   | CTG | AGA | CAG | 2 | G | C |
| TCGA-61-1895 | LCLAT1     | ENST00000309052 | p.K411N  | c.1233G>C  | Unverified | TCA | AAG | AAA | 3 | G | C |

|              |            |                     |          |            |            |     |     |     |   |   |   |
|--------------|------------|---------------------|----------|------------|------------|-----|-----|-----|---|---|---|
| TCGA-23-1117 | LCOR       | ENST00000371103     | p.V258L  | c.772G>C   | Verified   | CAA | GTT | CGA | 1 | G | C |
| TCGA-23-1117 | LCOR       | ENST00000371103     | p.V258L  | c.772G>C   | Verified   | CAA | GTT | CGA | 1 | G | C |
| TCGA-24-1435 | LCT        | ENST00000264162     | p.V716L  | c.2146G>C  | Verified   | CAT | GTG | TGG | 1 | G | C |
| TCGA-24-2289 | LDB3       | ENST00000361373     | p.G162A  | c.485G>C   | Unverified | CCT | GGC | CCT | 2 | G | C |
| TCGA-24-1422 | LDHAL6B    | ENST00000307144     | p.L222F  | c.666G>C   | Unverified | ttc | ttg | att | 3 | G | C |
| TCGA-23-1124 | LECT2      | ENST00000274507     | p.G76R   | c.226G>C   | Verified   | GTG | GGC | CAG | 1 | G | C |
| TCGA-29-1768 | LEKR1_ENST | ENST00000356539_v65 | p.E628Q  | c.1882G>C  | Unverified | TCT | GAA | AAA | 1 | G | C |
| TCGA-30-1855 | LMOD3      | ENST00000420581     | p.E38Q   | c.112G>C   | Unverified | TCG | GAA | ATG | 1 | G | C |
| TCGA-30-1855 | LMOD3_ENST | ENST00000420581     | p.E38Q   | c.112G>C   | Unverified | TCG | GAA | ATG | 1 | G | C |
| TCGA-61-1740 | LNx1       | ENST00000306888     | p.G419A  | c.1256G>C  | Unverified | CCC | GGT | GAA | 2 | G | C |
| TCGA-61-1740 | LNx1_ENST  | ENST00000263925     | p.G515A  | c.1544G>C  | Unverified | CCC | GGT | GAA | 2 | G | C |
| TCGA-13-1496 | LOC652153  | ENST00000316490     | p.D1816H | c.5446G>C  | Verified   | TTT | GAT | CAG | 1 | G | C |
| TCGA-30-1855 | LOC652153  | ENST00000316490     | p.E1278Q | c.3832G>C  | Unverified | ATA | GAA | GAA | 1 | G | C |
| TCGA-24-2288 | LONRF3     | ENST00000365713     | p.R242P  | c.725G>C   | Unverified | gcg | cga | gcg | 2 | G | C |
| TCGA-24-2262 | LOXL3      | ENST00000264094     | p.G316R  | c.946G>C   | Unverified | cct | gga | gag | 1 | G | C |
| TCGA-23-1032 | LOXL4      | ENST00000260702     | p.G511R  | c.1531G>C  | Verified   | cac | ggg | ccg | 1 | G | C |
| TCGA-23-1124 | LPAR4      | ENST00000435339     | p.D307H  | c.919G>C   | Verified   | ttt | gac | cct | 1 | G | C |
| TCGA-13-1497 | LPCAT3     | ENST00000261407     | p.W344C  | c.1032G>C  | Verified   | GCC | TGG | GTG | 3 | G | C |
| TCGA-09-1674 | LPP_ENST00 | ENST00000312675     | p.D559H  | c.1675G>C  | Unverified | TTG | GAT | CGA | 1 | G | C |
| TCGA-13-1509 | LRCH3      | ENST00000334859     | p.R350T  | c.1049G>C  | Verified   | CGA | AGA | GAA | 2 | G | C |
| TCGA-04-1542 | LRFN5      | ENST00000298119     | p.A695P  | c.2083G>C  | Verified   | AGA | GCA | CAT | 1 | G | C |
| TCGA-61-1895 | LRIT2      | ENST00000372113     | p.A384P  | c.1150G>C  | Unverified | CTT | GCA | GTG | 1 | G | C |
| TCGA-61-1899 | LRP1B      | ENST00000389484     | p.S1177S | c.3531G>C  | Unverified | TGT | TCG | CTG | 3 | G | C |
| TCGA-36-1577 | LRP2       | ENST00000263816     | p.W2523S | c.7568G>C  | Unverified | TAC | TGG | GCT | 2 | G | C |
| TCGA-04-1362 | LRP2       | ENST00000263816     | p.V4541V | c.13623G>C | Verified   | CAG | GTG | ACT | 3 | G | C |
| TCGA-30-1857 | LRP8       | ENST00000306052     | p.D862H  | c.2584G>C  | Unverified | TTT | GAC | AAC | 1 | G | C |
| TCGA-09-2050 | LRRc16B    | ENST00000342740     | p.A313P  | c.937G>C   | Verified   | ACT | GCC | ATT | 1 | G | C |
| TCGA-24-2267 | LRRc23     | ENST00000007969     | p.E27Q   | c.79G>C    | Verified   | ACA | GAG | GAG | 1 | G | C |
| TCGA-29-1693 | LRRc3B     | ENST00000396641     | p.W213C  | c.639G>C   | Unverified | GGC | TGG | TTC | 3 | G | C |
| TCGA-29-1693 | LRRc6      | ENST00000250173     | p.D175H  | c.523G>C   | Unverified | AAA | GAT | CAC | 1 | G | C |
| TCGA-24-1469 | LRRc7      | ENST00000035383     | p.D938H  | c.2812G>C  | Verified   | AAA | GAT | ATC | 1 | G | C |
| TCGA-23-1031 | LRRc7      | ENST00000035383     | p.R703P  | c.2108G>C  | Verified   | ACC | CGG | GTT | 2 | G | C |
| TCGA-29-1766 | LRRc8C     | ENST00000370454     | p.L777L  | c.2331G>C  | Unverified | GCT | CTG | AAG | 3 | G | C |
| TCGA-13-1488 | LRRc8D     | ENST00000337338     | p.L476L  | c.1428G>C  | Verified   | CAT | CTG | TTC | 3 | G | C |

|              |            |                 |          |            |            |     |     |     |   |   |   |
|--------------|------------|-----------------|----------|------------|------------|-----|-----|-----|---|---|---|
| TCGA-04-1362 | LRRIQ1     | ENST00000256007 | p.W961C  | c.2883G>C  | Verified   | TAC | TGG | AAT | 3 | G | C |
| TCGA-09-2049 | LRRK1      | SU_LRRK1        | p.E1413D | c.4239G>C  | Verified   | aag | gag | cac | 3 | G | C |
| TCGA-61-1915 | LTBP3      | ENST00000322147 | p.G792A  | c.2375G>C  | Unverified | GCT | GGG | GAC | 2 | G | C |
| TCGA-13-0883 | LTK_ENST00 | ENST00000263800 | p.W831C  | c.2493G>C  | Unverified | AGC | TGG | GGA | 3 | G | C |
| TCGA-30-1857 | LUC7L3     | ENST00000505658 | p.D203H  | c.607G>C   | Unverified | GGA | GAT | GCC | 1 | G | C |
| TCGA-24-1850 | LYG1       | ENST00000308528 | p.G164R  | c.490G>C   | Unverified | GGG | GGT | GCT | 1 | G | C |
| TCGA-13-0890 | LYN        | ENST00000519728 | p.V303L  | c.907G>C   | Verified   | CTC | GTG | AGG | 1 | G | C |
| TCGA-24-2288 | MACF1      | ENST00000360115 | p.V1920L | c.5758G>C  | Unverified | AAA | GTG | TTA | 1 | G | C |
| TCGA-04-1638 | MACF1      | ENST00000360115 | p.K3970N | c.11910G>C | Unverified | GAA | AAG | ATA | 3 | G | C |
| TCGA-04-1638 | MACF1_ENS  | ENST00000361689 | p.K3468N | c.10404G>C | Unverified | GAA | AAG | ATA | 3 | G | C |
| TCGA-25-2400 | MADD       | ENST00000311027 | p.V1408L | c.4222G>C  | Verified   | CTT | GTG | TAC | 1 | G | C |
| TCGA-24-2024 | MAEA       | ENST00000303400 | p.K77N   | c.231G>C   | Verified   | GAG | AAG | CTC | 3 | G | C |
| TCGA-24-1469 | MAGEE1     | ENST00000361470 | p.E720Q  | c.2158G>C  | Verified   | GCA | GAG | GTA | 1 | G | C |
| TCGA-04-1336 | MAGI2      | ENST00000354212 | p.R627R  | c.1881G>C  | Verified   | CAG | CGG | GTG | 3 | G | C |
| TCGA-25-1326 | MAGI3      | ENST00000369615 | p.G737A  | c.2210G>C  | Verified   | TTT | GGC | TTC | 2 | G | C |
| TCGA-24-1849 | MAMDC2     | ENST00000377182 | p.G507A  | c.1520G>C  | Unverified | CCT | GGA | GAG | 2 | G | C |
| TCGA-09-2050 | MAP2       | ENST00000360351 | p.E837Q  | c.2509G>C  | Verified   | TCA | GAG | ACT | 1 | G | C |
| TCGA-24-1474 | MAP2       | ENST00000360351 | p.G1678A | c.5033G>C  | Verified   | ATC | GGA | TCA | 2 | G | C |
| TCGA-25-2400 | MAP3K2     | ENST00000409947 | p.D221H  | c.661G>C   | Verified   | CTT | GAT | AGT | 1 | G | C |
| TCGA-13-1498 | MAP3K5     | ENST00000359015 | p.?      | c.806+1G>C | Verified   | TCT | AGC | CAG | 2 | G | C |
| TCGA-29-1770 | MAP3K6_EN  | ENST00000374040 | p.R178R  | c.534G>C   | Unverified | GGT | CGG | GTG | 3 | G | C |
| TCGA-29-1770 | MAP3K6_EN  | ENST00000493901 | p.R186R  | c.558G>C   | Unverified | GGT | CGG | GTG | 3 | G | C |
| TCGA-13-0904 | MAP7D1     | ENST00000373151 | p.Q795H  | c.2385G>C  | Verified   | CAC | CAG | GAG | 3 | G | C |
| TCGA-23-1110 | MAPKAP1    | ENST00000350766 | p.R81T   | c.242G>C   | Verified   | ATT | AGA | AGA | 2 | G | C |
| TCGA-30-1857 | MASP1      | ENST00000337774 | p.D689H  | c.2065G>C  | Unverified | AAG | GAC | TGG | 1 | G | C |
| TCGA-24-0979 | MASP2      | ENST00000400897 | p.A305P  | c.913G>C   | Verified   | ATG | GCG | CCA | 1 | G | C |
| TCGA-29-1699 | MASTL      | ENST00000375946 | p.E403Q  | c.1207G>C  | Unverified | GTA | GAA | CTG | 1 | G | C |
| TCGA-24-1604 | MBD4       | ENST00000249910 | p.R492T  | c.1475G>C  | Unverified | gca | aga | acc | 2 | G | C |
| TCGA-23-1116 | MC3R       | NM_019888.2     | p.G86R   | c.256G>C   | Verified   | ctg | ggc | atc | 1 | G | C |
| TCGA-13-1501 | MCAM       | ENST00000264036 | p.R406P  | c.1217G>C  | Verified   | TAT | CGC | TGC | 2 | G | C |
| TCGA-13-1501 | MCAM       | ENST00000264036 | p.R406P  | c.1217G>C  | Verified   | TAT | CGC | TGC | 2 | G | C |
| TCGA-29-1766 | MCM6       | ENST00000264156 | p.R92R   | c.276G>C   | Unverified | tgt | cgg | gcc | 3 | G | C |
| TCGA-24-1422 | MDH1B      | ENST00000374412 | p.S58T   | c.173G>C   | Verified   | TGG | AGT | CAC | 2 | G | C |
| TCGA-25-1313 | MDN1       | ENST00000369393 | p.W4189C | c.12567G>C | Verified   | TCA | TGG | GAT | 3 | G | C |



|              |           |                 |          |           |            |     |     |     |   |   |   |
|--------------|-----------|-----------------|----------|-----------|------------|-----|-----|-----|---|---|---|
| TCGA-09-2056 | MED13     | ENST00000397786 | p.D1087H | c.3259G>C | Verified   | AAA | GAC | TGT | 1 | G | C |
| TCGA-24-1470 | MED29     | ENST00000315588 | p.D76H   | c.226G>C  | Verified   | TTC | GAT | CCT | 1 | G | C |
| TCGA-04-1347 | MEGF10    | ENST00000274473 | p.C191S  | c.572G>C  | Verified   | GAC | TGT | CAT | 2 | G | C |
| TCGA-24-1846 | MEMO1     | ENST00000295065 | p.W114S  | c.341G>C  | Unverified | CTG | TGG | AAG | 2 | G | C |
| TCGA-04-1337 | MEP1B     | ENST00000269202 | p.S560T  | c.1679G>C | Verified   | ACC | AGT | GCC | 2 | G | C |
| TCGA-30-1855 | METAP2    | ENST00000323666 | p.G475R  | c.1423G>C | Unverified | AGA | GGA | GAT | 1 | G | C |
| TCGA-09-0369 | MFGE8     | ENST00000268150 | p.E72Q   | c.214G>C  | Verified   | GTC | GAG | CCA | 1 | G | C |
| TCGA-09-0369 | MFGE8     | ENST00000268150 | p.E72Q   | c.214G>C  | Verified   | GTC | GAG | CCA | 1 | G | C |
| TCGA-29-1695 | MFSD6     | ENST00000392328 | p.R413S  | c.1239G>C | Unverified | GAA | AGG | AAC | 3 | G | C |
| TCGA-13-0791 | MGC33414  | ENST00000329206 | p.D36H   | c.106G>C  | Verified   | GTG | GAT | GCT | 1 | G | C |
| TCGA-24-2288 | MGC42105  | ENST00000326035 | p.L257F  | c.771G>C  | Unverified | GCC | TTG | GGG | 3 | G | C |
| TCGA-23-1120 | MIA3      | ENST00000344922 | p.Q940H  | c.2820G>C | Verified   | TTC | CAG | AAG | 3 | G | C |
| TCGA-23-2077 | MICAL2    | ENST00000256194 | p.K866N  | c.2598G>C | Unverified | ACA | AAG | AAC | 3 | G | C |
| TCGA-09-2056 | MID1      | ENST00000453318 | p.A394P  | c.1180G>C | Verified   | aca | gct | tca | 1 | G | C |
| TCGA-13-0762 | MID1      | ENST00000453318 | p.E271Q  | c.811G>C  | Verified   | att | gag | atc | 1 | G | C |
| TCGA-13-0762 | MID1      | ENST00000453318 | p.E271Q  | c.811G>C  | Verified   | att | gag | atc | 1 | G | C |
| TCGA-24-2024 | MKL2      | ENST00000318282 | p.E578D  | c.1734G>C | Verified   | AAA | GAG | AAG | 3 | G | C |
| TCGA-13-1510 | MKLN1     | ENST00000352689 | p.D671H  | c.2011G>C | Unverified | TCA | GAC | CCA | 1 | G | C |
| TCGA-61-1910 | MKNK1     | ENST00000371946 | p.E125Q  | c.373G>C  | Unverified | ttt | gag | aaa | 1 | G | C |
| TCGA-23-1124 | MKRN1     | ENST00000255977 | p.Q401H  | c.1203G>C | Verified   | CCA | CAG | AGA | 3 | G | C |
| TCGA-09-1665 | MLEC      | ENST00000228506 | p.R253P  | c.758G>C  | Verified   | AAC | CGG | GTG | 2 | G | C |
| TCGA-13-0885 | MLL       | NM_005933.1     | p.D1690H | c.5068G>C | Verified   | cct | gat | cca | 1 | G | C |
| TCGA-24-1844 | MLL       | NM_005933.1     | p.A1212P | c.3634G>C | Unverified | aaa | gct | gtg | 1 | G | C |
| TCGA-24-1844 | MLL_ENSTO | ENST00000534358 | p.A1212P | c.3634G>C | Unverified | AAA | GCT | GTG | 1 | G | C |
| TCGA-10-0930 | MLPH      | ENST00000264605 | p.K412N  | c.1236G>C | Verified   | GAA | AAG | GCA | 3 | G | C |
| TCGA-10-0930 | MLPH      | ENST00000264605 | p.K412N  | c.1236G>C | Verified   | GAA | AAG | GCA | 3 | G | C |
| TCGA-20-1687 | MME       | ENST00000360490 | p.R254T  | c.761G>C  | Unverified | GCC | AGA | TTG | 2 | G | C |
| TCGA-13-0904 | MMP2      | ENST00000219070 | p.V400L  | c.1198G>C | Verified   | CTC | GTG | GCA | 1 | G | C |
| TCGA-24-1474 | MMP3      | ENST00000299855 | p.T277T  | c.831G>C  | Unverified | CCC | ACG | GAA | 3 | G | C |
| TCGA-13-1509 | MMS22L    | ENST00000275053 | p.M945I  | c.2835G>C | Verified   | GGA | ATG | ATG | 3 | G | C |
| TCGA-20-1683 | MNAT1     | ENST00000261245 | p.G270A  | c.809G>C  | Unverified | CTT | GGG | TAT | 2 | G | C |
| TCGA-13-0893 | MPDZ      | NM_003829.1     | p.M1774I | c.5322G>C | Verified   | tta | atg | gtg | 3 | G | C |
| TCGA-24-1469 | MPP1      | ENST00000369534 | p.K281N  | c.843G>C  | Verified   | ttc | aag | agg | 3 | G | C |
| TCGA-09-2050 | MRPL23    | ENST00000381519 | p.R18P   | c.53G>C   | Verified   | CTT | CGG | GTG | 2 | G | C |

|              |           |                 |          |            |            |     |     |     |   |   |   |
|--------------|-----------|-----------------|----------|------------|------------|-----|-----|-----|---|---|---|
| TCGA-29-1775 | MRPL44    | ENST00000258383 | p.Q139H  | c.417G>C   | Unverified | ACA | CAG | TTT | 3 | G | C |
| TCGA-20-0990 | MSH3      | NM_002439.1     | p.V283L  | c.847G>C   | Verified   | ttt | ggt | cat | 1 | G | C |
| TCGA-24-1845 | MSL2      | ENST00000309993 | p.K450N  | c.1350G>C  | Unverified | ACC | AAG | ACT | 3 | G | C |
| TCGA-24-1423 | MTA3      | ENST00000405094 | p.E308Q  | c.922G>C   | Verified   | ATT | GAA | TAT | 1 | G | C |
| TCGA-24-1849 | MTF2      | ENST00000370298 | p.C273S  | c.818G>C   | Unverified | CTA | TGC | CTT | 2 | G | C |
| TCGA-13-1501 | MTG1      | ENST00000317502 | p.V253V  | c.759G>C   | Unverified | TAC | GTG | CAG | 3 | G | C |
| TCGA-13-1501 | MTG1      | ENST00000317502 | p.V253V  | c.759G>C   | Unverified | TAC | GTG | CAG | 3 | G | C |
| TCGA-13-0884 | MTHFD1    | ENST00000555709 | p.G209A  | c.626G>C   | Verified   | AAA | GGT | GAC | 2 | G | C |
| TCGA-13-0890 | MTHFD1L   | ENST00000367321 | p.M749I  | c.2247G>C  | Verified   | aag | atg | cat | 3 | G | C |
| TCGA-13-0919 | MTL5      | ENST00000255087 | p.G218A  | c.653G>C   | Verified   | GGG | GGC | ACA | 2 | G | C |
| TCGA-13-0890 | MTMR12    | ENST00000382142 | p.E378Q  | c.1132G>C  | Verified   | aca | gaa | tgt | 1 | G | C |
| TCGA-24-1435 | MUC16     | ENST00000397910 | p.K5103N | c.15309G>C | Verified   | GAT | AAG | ATA | 3 | G | C |
| TCGA-61-1738 | MUC17     | ENST00000306151 | p.S1528T | c.4583G>C  | Unverified | GCC | AGT | TCT | 2 | G | C |
| TCGA-61-1738 | MUC17     | ENST00000306151 | p.S1528T | c.4583G>C  | Unverified | GCC | AGT | TCT | 2 | G | C |
| TCGA-20-0990 | MUC4      | ENST00000346145 | p.W163C  | c.489G>C   | Unverified | TTC | TGG | GAC | 3 | G | C |
| TCGA-20-0990 | MUC4_ENST | ENST00000405167 | p.W4271C | c.12813G>C | Unverified | TTC | TGG | GAC | 3 | G | C |
| TCGA-04-1655 | MUSK      | ENST00000374448 | p.V16L   | c.46G>C    | Unverified | CTG | GTT | GCC | 1 | G | C |
| TCGA-23-1120 | MUSK      | ENST00000374448 | p.E209Q  | c.625G>C   | Verified   | GTT | GAG | GTT | 1 | G | C |
| TCGA-24-1469 | MYB       | ENST00000367814 | p.E514Q  | c.1540G>C  | Unverified | gct | gag | ttt | 1 | G | C |
| TCGA-24-1469 | MYB_ENST0 | ENST00000341911 | p.E635Q  | c.1903G>C  | Unverified | GCT | GAG | TTT | 1 | G | C |
| TCGA-13-0762 | MYBPC1    | ENST00000361466 | p.D1023H | c.3067G>C  | Verified   | GAG | GAT | GCC | 1 | G | C |
| TCGA-13-0762 | MYBPC1    | ENST00000361466 | p.D1023H | c.3067G>C  | Verified   | GAG | GAT | GCC | 1 | G | C |
| TCGA-23-1124 | MYCBP2_EN | ENST00000357337 | p.M4469I | c.13407G>C | Verified   | TTA | ATG | AGA | 3 | G | C |
| TCGA-24-2035 | MYCBPAP   | NM_032133.2     | p.R259P  | c.776G>C   | Unverified | cgg | cgt | gat | 2 | G | C |
| TCGA-61-2008 | MYCBPAP   | NM_032133.2     | p.R215P  | c.644G>C   | Verified   | ctg | cgg | aag | 2 | G | C |
| TCGA-04-1347 | MYEF2     | ENST00000324324 | p.D165H  | c.493G>C   | Verified   | TAT | GAT | CTT | 1 | G | C |
| TCGA-61-1899 | MYF5      | ENST00000228644 | p.E132D  | c.396G>C   | Unverified | ATC | GAG | AGC | 3 | G | C |
| TCGA-13-0893 | MYH13_ENS | ENST00000570743 | p.R30P   | c.89G>C    | Verified   | AAT | CGT | CCA | 2 | G | C |
| TCGA-04-1347 | MYH4      | ENST00000255381 | p.G461R  | c.1381G>C  | Verified   | ATC | GGG | GTC | 1 | G | C |
| TCGA-13-1488 | MYH6      | ENST00000356287 | p.L1546L | c.4638G>C  | Verified   | GCC | CTG | GAG | 3 | G | C |
| TCGA-29-1777 | MYH7      | ENST00000355349 | p.E1028Q | c.3082G>C  | Unverified | CTG | GAG | CAG | 1 | G | C |
| TCGA-13-0904 | MYH7B     | ENST00000262873 | p.A1239P | c.3715G>C  | Unverified | GTG | GCG | GCA | 1 | G | C |
| TCGA-24-1844 | MYH8      | ENST00000403437 | p.V1925L | c.5773G>C  | Unverified | CGA | GTG | AAG | 1 | G | C |
| TCGA-04-1655 | MYH8      | ENST00000403437 | p.R372P  | c.1115G>C  | Unverified | CAG | CGT | GAG | 2 | G | C |

|              |            |                 |          |             |            |     |     |     |   |   |   |
|--------------|------------|-----------------|----------|-------------|------------|-----|-----|-----|---|---|---|
| TCGA-04-1649 | MYO16      | ENST00000357550 | p.R47S   | c.141G>C    | Unverified | AAA | AGG | CTG | 3 | G | C |
| TCGA-29-1768 | MYO16      | ENST00000357550 | p.L645F  | c.1935G>C   | Unverified | GTT | TTG | AAA | 3 | G | C |
| TCGA-29-1768 | MYO18A     | ENST00000527372 | p.G607R  | c.1819G>C   | Unverified | GAT | GGC | ACC | 1 | G | C |
| TCGA-04-1361 | MYO18A_EN  | ENST00000527372 | p.E1749Q | c.5245G>C   | Verified   | CTG | GAG | GAA | 1 | G | C |
| TCGA-04-1361 | MYO18A_EN  | ENST00000527372 | p.E1749Q | c.5245G>C   | Verified   | CTG | GAG | GAA | 1 | G | C |
| TCGA-29-1768 | MYO18A_EN  | ENST00000527372 | p.G607R  | c.1819G>C   | Unverified | GAT | GGC | ACC | 1 | G | C |
| TCGA-13-1408 | MYO18B     | ENST00000335473 | p.K140N  | c.420G>C    | Verified   | AAA | AAG | ACT | 3 | G | C |
| TCGA-09-2044 | MYO1B      | ENST00000339514 | p.W764C  | c.2292G>C   | Verified   | GGT | TGG | AAG | 3 | G | C |
| TCGA-29-1777 | MYO1E      | ENST00000288235 | p.S661S  | c.1983G>C   | Unverified | CAG | TCG | GTC | 3 | G | C |
| TCGA-23-1123 | MYO1F      | ENST00000338257 | p.K15N   | c.45G>C     | Verified   | GTG | AAG | CAG | 3 | G | C |
| TCGA-23-1123 | MYO1F      | ENST00000338257 | p.K15N   | c.45G>C     | Verified   | GTG | AAG | CAG | 3 | G | C |
| TCGA-61-2113 | MYO3B      | NM_138995       | p.D776H  | c.2326G>C   | Verified   | gag | gac | aac | 1 | G | C |
| TCGA-23-2078 | MYO5A      | ENST00000399231 | p.W414S  | c.1241G>C   | Verified   | AAC | TGG | ATT | 2 | G | C |
| TCGA-61-1899 | MYO5B      | ENST00000285039 | p.?      | c.1404+1G>C | Unverified | AAC | TCG | CAT | 3 | G | C |
| TCGA-13-0887 | MYO7A      | ENST00000409709 | p.K1737N | c.5211G>C   | Verified   | TCC | AAG | GCC | 3 | G | C |
| TCGA-23-1021 | MYO9B_EN   | ENST00000319396 | p.V697L  | c.2089G>C   | Verified   | GCA | GTG | CTT | 1 | G | C |
| TCGA-04-1336 | MYT1       | ENST00000328439 | p.E1104Q | c.3310G>C   | Verified   | CCG | GAG | AAC | 1 | G | C |
| TCGA-04-1338 | N4BP1_EN   | ENST00000262384 | p.E274Q  | c.820G>C    | Verified   | GAA | GAG | GCA | 1 | G | C |
| TCGA-13-0893 | NARS2      | ENST00000281038 | p.E137D  | c.411G>C    | Verified   | CTG | GAG | TAT | 3 | G | C |
| TCGA-24-1604 | NAV1       | ENST00000367296 | p.V1699L | c.5095G>C   | Unverified | CTG | GTA | GAG | 1 | G | C |
| TCGA-13-1488 | NAV2       | ENST00000360655 | p.E2089Q | c.6265G>C   | Verified   | GGA | GAA | ATC | 1 | G | C |
| TCGA-13-0924 | NBEA       | ENST00000310336 | p.R2219P | c.6656G>C   | Verified   | AGA | CGT | TAC | 2 | G | C |
| TCGA-25-1313 | NBEAL1     | ENST00000388944 | p.L81F   | c.243G>C    | Verified   | CAT | TTG | AGT | 3 | G | C |
| TCGA-25-1313 | NBEAL1_EN  | ENST00000449802 | p.L1371F | c.4113G>C   | Verified   | CAT | TTG | AGT | 3 | G | C |
| TCGA-20-0990 | NCCRP1     | ENST00000339852 | p.W152S  | c.455G>C    | Verified   | AGC | TGG | ACA | 2 | G | C |
| TCGA-13-1509 | NCF2       | ENST00000367536 | p.W167C  | c.501G>C    | Verified   | GTC | TGG | AAG | 3 | G | C |
| TCGA-23-1029 | NCKAP1     | ENST00000360982 | p.W230C  | c.690G>C    | Unverified | CAG | TGG | AGA | 3 | G | C |
| TCGA-61-1904 | NCKAP5L_EN | ENST00000335999 | p.R933P  | c.2798G>C   | Unverified | AAC | CGC | CGC | 2 | G | C |
| TCGA-24-2280 | NDUFA13    | NM_015965.3     | p.P95P   | c.285G>C    | Unverified | cct | ccg | ccg | 3 | G | C |
| TCGA-13-0923 | NEB        | ENST00000409198 | p.E6187Q | c.18559G>C  | Verified   | AAG | GAA | GCA | 1 | G | C |
| TCGA-29-1776 | NEU4       | ENST00000325935 | p.G76R   | c.226G>C    | Unverified | GCC | GGG | GGC | 1 | G | C |
| TCGA-13-1510 | NEURL      | ENST00000369780 | p.Q73H   | c.219G>C    | Unverified | TCC | CAG | ATC | 3 | G | C |
| TCGA-25-2391 | NEUROD1    | ENST00000295108 | p.S162T  | c.485G>C    | Unverified | AAA | AGC | CCA | 2 | G | C |
| TCGA-25-2401 | NEUROD6    | ENST00000297142 | p.D226H  | c.676G>C    | Verified   | CTT | GAT | AAT | 1 | G | C |

|              |           |                 |          |            |            |     |     |     |   |   |   |
|--------------|-----------|-----------------|----------|------------|------------|-----|-----|-----|---|---|---|
| TCGA-13-0900 | NFKBID    | ENST00000396901 | p.V210L  | c.628G>C   | Unverified | ACA | GTT | CTG | 1 | G | C |
| TCGA-13-1488 | NFRKB     | ENST00000524794 | p.G1147R | c.3439G>C  | Verified   | TCT | GGA | ACT | 1 | G | C |
| TCGA-13-1497 | NHEDC1    | ENST00000296422 | p.K367N  | c.1101G>C  | Verified   | CAA | AAG | ATT | 3 | G | C |
| TCGA-13-1489 | NID2      | ENST00000216286 | p.?      | c.229-1G>C | Verified   | TAC | GTG | GGC | 1 | G | C |
| TCGA-61-2008 | NLGN1     | ENST00000457714 | p.V205L  | c.613G>C   | Verified   | atc | gtc | atc | 1 | G | C |
| TCGA-13-1510 | NLRC5     | ENST00000262510 | p.A1443P | c.4327G>C  | Unverified | TTG | GCT | CAC | 1 | G | C |
| TCGA-24-2290 | NOD2      | ENST00000300589 | p.G78A   | c.233G>C   | Verified   | ctg | ggc | cag | 2 | G | C |
| TCGA-24-2290 | NOD2      | ENST00000300589 | p.G78A   | c.233G>C   | Verified   | ctg | ggc | cag | 2 | G | C |
| TCGA-04-1338 | NOS1      | ENST00000317775 | p.E333D  | c.999G>C   | Verified   | ACT | GAG | TAC | 3 | G | C |
| TCGA-04-1542 | NOTCH4    | ENST00000375023 | p.V344V  | c.1032G>C  | Verified   | tgt | gtg | agt | 3 | G | C |
| TCGA-13-0920 | NOV       | ENST00000259526 | p.K288N  | c.864G>C   | Verified   | tac | aag | ccc | 3 | G | C |
| TCGA-24-2289 | NPHP4     | ENST00000378156 | p.V298L  | c.892G>C   | Unverified | TTC | GTG | CAG | 1 | G | C |
| TCGA-09-1674 | NPHS2     | ENST00000367615 | p.D244H  | c.730G>C   | Unverified | CAA | GAT | GCA | 1 | G | C |
| TCGA-13-0900 | NRAP      | ENST00000359988 | p.K374N  | c.1122G>C  | Verified   | TAT | AAG | AAG | 3 | G | C |
| TCGA-24-2290 | NRIP2     | ENST00000337508 | p.E32Q   | c.94G>C    | Verified   | aga | gag | gac | 1 | G | C |
| TCGA-24-2290 | NRIP2     | ENST00000337508 | p.E32Q   | c.94G>C    | Verified   | aga | gag | gac | 1 | G | C |
| TCGA-29-1762 | NRIP3     | ENST00000309166 | p.V231L  | c.691G>C   | Unverified | aca | gtc | tct | 1 | G | C |
| TCGA-13-0884 | NRP1      | ENST00000265371 | p.G423A  | c.1268G>C  | Verified   | TAC | GGT | TGC | 2 | G | C |
| TCGA-61-1900 | NRXN3_ENS | ENST00000428277 | p.V33L   | c.97G>C    | Unverified | TCT | GTA | TGG | 1 | G | C |
| TCGA-25-2391 | NTF3      | ENST00000331010 | p.G125R  | c.373G>C   | Unverified | gtg | ggc | agc | 1 | G | C |
| TCGA-13-0919 | NTRK3     | ENST00000394480 | p.V501V  | c.1503G>C  | Verified   | ACT | GTG | GTC | 3 | G | C |
| TCGA-24-2035 | NUBP1     | ENST00000283027 | p.R145T  | c.434G>C   | Verified   | TGG | AGG | GGA | 2 | G | C |
| TCGA-04-1356 | NUP160    | ENST00000378460 | p.E52Q   | c.154G>C   | Verified   | GCT | GAG | CGC | 1 | G | C |
| TCGA-20-1685 | NUP188    | ENST00000372577 | p.K1721N | c.5163G>C  | Unverified | ggc | aag | tcc | 3 | G | C |
| TCGA-24-2288 | NUP210    | ENST00000254508 | p.E1606Q | c.4816G>C  | Unverified | CCA | GAG | ACC | 1 | G | C |
| TCGA-29-1690 | NUP62     | ENST00000352066 | p.S283T  | c.848G>C   | Unverified | ACC | AGC | AGC | 2 | G | C |
| TCGA-04-1337 | NUP85     | ENST00000245544 | p.E628Q  | c.1882G>C  | Verified   | ATA | GAG | ACC | 1 | G | C |
| TCGA-13-0900 | NXF3      | ENST00000395065 | p.Q134H  | c.402G>C   | Verified   | att | cag | aat | 3 | G | C |
| TCGA-09-1665 | OAS1      | ENST00000445409 | p.V262L  | c.784G>C   | Verified   | TTA | GTC | ATA | 1 | G | C |
| TCGA-61-1895 | OAS3      | ENST00000228928 | p.W340C  | c.1020G>C  | Unverified | TCT | TGG | AAG | 3 | G | C |
| TCGA-13-0885 | ODF1      | ENST00000285402 | p.S5T    | c.14G>C    | Verified   | CTG | AGT | TGT | 2 | G | C |
| TCGA-25-2393 | ODZ1      | ENST00000371130 | p.D118H  | c.352G>C   | Verified   | CCT | GAC | CAT | 1 | G | C |
| TCGA-29-1761 | ODZ1      | ENST00000371130 | p.G2362A | c.7085G>C  | Unverified | GGA | GGA | CTC | 2 | G | C |
| TCGA-61-1907 | ODZ1      | ENST00000371130 | p.R2204T | c.6611G>C  | Unverified | ACC | AGA | TTA | 2 | G | C |

|              |           |                 |          |           |            |     |     |     |   |   |   |
|--------------|-----------|-----------------|----------|-----------|------------|-----|-----|-----|---|---|---|
| TCGA-04-1362 | ODZ2      | ENST00000388903 | p.E1167Q | c.3499G>C | Verified   | GTA | GAC | AAG | 1 | G | C |
| TCGA-23-1114 | ODZ2_ENST | ENST00000518659 | p.A1232P | c.3694G>C | Unverified | CTT | GCT | GAA | 1 | G | C |
| TCGA-23-1114 | ODZ2_ENST | ENST00000519204 | p.A1111P | c.3331G>C | Unverified | CTT | GCT | GAA | 1 | G | C |
| TCGA-25-2401 | OLA1      | ENST00000284719 | p.A171P  | c.511G>C  | Verified   | GTG | GCT | GTG | 1 | G | C |
| TCGA-04-1343 | OLFM3     | ENST00000370103 | p.E132Q  | c.394G>C  | Verified   | GAC | GAG | CTC | 1 | G | C |
| TCGA-24-1423 | OPHN1     | ENST00000355520 | p.D137H  | c.409G>C  | Verified   | aag | gat | ggt | 1 | G | C |
| TCGA-09-2056 | OPN4      | ENST00000372071 | p.K304N  | c.912G>C  | Verified   | TGC | AAG | ATG | 3 | G | C |
| TCGA-29-1693 | OPTN      | ENST00000263036 | p.G21R   | c.61G>C   | Unverified | ACA | GGA | AAT | 1 | G | C |
| TCGA-13-0885 | OR10AD1   | ENST00000310248 | p.K140N  | c.420G>C  | Verified   | CAG | AAG | GTC | 3 | G | C |
| TCGA-24-1845 | OR10C1    | ENST00000444197 | p.V38L   | c.112G>C  | Unverified | ACC | GTG | GCA | 1 | G | C |
| TCGA-29-1691 | OR11H4    | ENST00000315409 | p.G317A  | c.950G>C  | Unverified | TTT | GGA | ATG | 2 | G | C |
| TCGA-23-1114 | OR1J1     | ENST00000259357 | p.A237P  | c.709G>C  | Unverified | AAA | GCC | TTG | 1 | G | C |
| TCGA-24-1469 | OR1N2     | ENST00000373688 | p.G46A   | c.137G>C  | Verified   | TTT | GGC | ATC | 2 | G | C |
| TCGA-61-2109 | OR2T5     | ENST00000366473 | p.V48L   | c.142G>C  | Unverified | GCT | GTC | CTG | 1 | G | C |
| TCGA-13-0886 | OR4B1     | ENST00000309562 | p.R224T  | c.671G>C  | Verified   | TTG | AGG | AAC | 2 | G | C |
| TCGA-25-2400 | OR4C15    | ENST00000314644 | p.V299L  | c.895G>C  | Verified   | GCT | GTT | GTG | 1 | G | C |
| TCGA-13-0885 | OR4D5     | ENST00000307033 | p.C240S  | c.719G>C  | Verified   | ACC | TGT | GCC | 2 | G | C |
| TCGA-24-1850 | OR4K14    | ENST00000305045 | p.L167F  | c.501G>C  | Unverified | AAT | TTG | CCT | 3 | G | C |
| TCGA-04-1342 | OR51S1    | ENST00000322101 | p.R130R  | c.390G>C  | Verified   | GAT | CGG | GCA | 3 | G | C |
| TCGA-10-0930 | OR5D16    | ENST00000378396 | p.A35P   | c.103G>C  | Verified   | CTG | GCA | GTC | 1 | G | C |
| TCGA-10-0930 | OR5D16    | ENST00000378396 | p.A35P   | c.103G>C  | Verified   | CTG | GCA | GTC | 1 | G | C |
| TCGA-23-1032 | OR5L1     | ENST00000333973 | p.V281L  | c.841G>C  | Verified   | GTC | GTG | ATT | 1 | G | C |
| TCGA-13-1499 | OR6K3     | ENST00000368146 | p.E127D  | c.381G>C  | Verified   | TCA | GAG | GGG | 3 | G | C |
| TCGA-29-1693 | OR7A17    | ENST00000327462 | p.L166L  | c.498G>C  | Unverified | TGG | CTG | TCC | 3 | G | C |
| TCGA-29-1763 | OR7D4     | ENST00000308682 | p.L30L   | c.90G>C   | Unverified | GGG | CTG | TTC | 3 | G | C |
| TCGA-13-0807 | OR8B8     | ENST00000328064 | p.G165R  | c.493G>C  | Verified   | ATG | GGT | GTG | 1 | G | C |
| TCGA-61-2008 | OS9       | ENST00000315970 | p.D420H  | c.1258G>C | Verified   | GAG | GAT | GAG | 1 | G | C |
| TCGA-23-1031 | OSBP2     | ENST00000332585 | p.E109Q  | c.325G>C  | Unverified | TCA | GAG | TCA | 1 | G | C |
| TCGA-04-1542 | OSBPL1A   | ENST00000319481 | p.S551T  | c.1652G>C | Verified   | TGG | AGC | ATC | 2 | G | C |
| TCGA-30-1714 | OTX1      | ENST00000282549 | p.S183S  | c.549G>C  | Unverified | ATC | TCG | CCA | 3 | G | C |
| TCGA-04-1336 | P2RY11    | ENST00000321826 | p.G25G   | c.75G>C   | Verified   | AGT | GGG | TTC | 3 | G | C |
| TCGA-23-1031 | PABPC3    | ENST00000281589 | p.R287S  | c.861G>C  | Verified   | GAT | AGG | ATC | 3 | G | C |
| TCGA-23-1123 | PABPC5    | ENST00000312600 | p.G146A  | c.437G>C  | Verified   | aag | ggt | tat | 2 | G | C |
| TCGA-23-1123 | PABPC5    | ENST00000312600 | p.G146A  | c.437G>C  | Verified   | aag | ggt | tat | 2 | G | C |

|              |                      |                 |         |           |            |     |     |     |   |   |   |
|--------------|----------------------|-----------------|---------|-----------|------------|-----|-----|-----|---|---|---|
| TCGA-24-2289 | PADI6                | ENST00000358481 | p.V682L | c.2044G>C | Unverified | CGG | GTG | CCC | 1 | G | C |
| TCGA-29-1769 | PAK2                 | ENST00000327134 | p.E115Q | c.343G>C  | Unverified | CTA | GAG | CAA | 1 | G | C |
| TCGA-29-1769 | PAK2_ENST00000327134 | ENST00000327134 | p.E115Q | c.343G>C  | Unverified | CTA | GAG | CAA | 1 | G | C |
| TCGA-13-1481 | PALM2-AKA            | ENST00000374530 | p.G626R | c.1876G>C | Verified   | CCC | GGT | GCC | 1 | G | C |
| TCGA-13-0923 | PALMD                | ENST00000263174 | p.D200H | c.598G>C  | Verified   | TCA | GAT | GAC | 1 | G | C |
| TCGA-61-1904 | PAN2                 | ENST00000440411 | p.D828H | c.2482G>C | Unverified | GGG | GAT | GAG | 1 | G | C |
| TCGA-24-0979 | PANK3                | ENST00000239231 | p.E233D | c.699G>C  | Verified   | GAA | GAG | GCT | 3 | G | C |
| TCGA-24-2289 | PARP10               | ENST00000313028 | p.C514S | c.1541G>C | Unverified | TTG | TGC | CTG | 2 | G | C |
| TCGA-13-1488 | PARP4                | ENST00000381989 | p.D597H | c.1789G>C | Verified   | GAA | GAT | TAC | 1 | G | C |
| TCGA-23-1022 | PAX7                 | ENST00000375375 | p.V60L  | c.178G>C  | Verified   | ATA | GTG | GAG | 1 | G | C |
| TCGA-23-1124 | PBX4                 | ENST00000251203 | p.E278Q | c.832G>C  | Verified   | GAA | GAG | GCT | 1 | G | C |
| TCGA-13-0714 | PC                   | ENST00000393955 | p.V42V  | c.126G>C  | Verified   | ATG | GTG | GCC | 3 | G | C |
| TCGA-61-1725 | PCDH1                | ENST00000287008 | p.G889R | c.2665G>C | Unverified | GCT | GGT | AAG | 1 | G | C |
| TCGA-23-1022 | PCDH1                | ENST00000287008 | p.G840G | c.2520G>C | Verified   | GCT | GGG | GAT | 3 | G | C |
| TCGA-23-1120 | PCDH12               | ENST00000231484 | p.D93H  | c.277G>C  | Verified   | CTG | GAT | CGA | 1 | G | C |
| TCGA-24-0975 | PCDH12               | ENST00000231484 | p.L71L  | c.213G>C  | Verified   | CAG | CTG | CCT | 3 | G | C |
| TCGA-29-1775 | PCDHA10              | ENST00000506939 | p.E143Q | c.427G>C  | Unverified | CCT | GAA | TCC | 1 | G | C |
| TCGA-29-1775 | PCDHA10_E            | ENST00000307360 | p.E143Q | c.427G>C  | Unverified | CCT | GAA | TCC | 1 | G | C |
| TCGA-13-0884 | PCDHA2               | ENST00000378132 | p.G8R   | c.22G>C   | Verified   | AGG | GGC | CGA | 1 | G | C |
| TCGA-13-1499 | PCDHA4               | ENST00000356878 | p.V687V | c.2061G>C | Verified   | GCT | GTG | GGT | 3 | G | C |
| TCGA-29-1763 | PCDHA6               | ENST00000289630 | p.G97R  | c.289G>C  | Unverified | TGC | GGG | CGG | 1 | G | C |
| TCGA-29-1763 | PCDHA6_EN            | ENST00000529310 | p.G97R  | c.289G>C  | Unverified | TGC | GGG | CGG | 1 | G | C |
| TCGA-23-1809 | PCDHA8               | ENST00000378123 | p.G97R  | c.289G>C  | Unverified | TGC | GGG | CGG | 1 | G | C |
| TCGA-23-1809 | PCDHA8_EN            | ENST00000531613 | p.G97R  | c.289G>C  | Unverified | TGC | GGG | CGG | 1 | G | C |
| TCGA-23-1022 | PCDHB15              | ENST00000231173 | p.E522D | c.1566G>C | Verified   | TAC | GAG | GCC | 3 | G | C |
| TCGA-29-1762 | PCDHGB1_E            | ENST00000523390 | p.E496Q | c.1486G>C | Unverified | CGG | GAG | CTG | 1 | G | C |
| TCGA-61-1740 | PCDHGC3              | ENST00000308177 | p.V506L | c.1516G>C | Unverified | CTA | GTG | GGT | 1 | G | C |
| TCGA-61-1740 | PCDHGC3_E            | ENST00000308177 | p.V506L | c.1516G>C | Unverified | CTA | GTG | GGT | 1 | G | C |
| TCGA-13-0792 | PCDHGC4              | ENST00000306593 | p.V584L | c.1750G>C | Verified   | TCA | GTT | GGT | 1 | G | C |
| TCGA-61-1725 | PCSK9                | ENST00000302118 | p.V233L | c.697G>C  | Unverified | GGG | GTG | GTC | 1 | G | C |
| TCGA-23-1122 | PDCD1                | ENST00000334409 | p.R86P  | c.257G>C  | Verified   | GAC | CGC | AGC | 2 | G | C |
| TCGA-13-1496 | PDCD5                | ENST00000221784 | p.E85D  | c.255G>C  | Verified   | agt | gag | aag | 3 | G | C |
| TCGA-29-2427 | PDCD8                | ENST00000287295 | p.K593N | c.1779G>C | Verified   | att | aag | gac | 3 | G | C |
| TCGA-13-1501 | PDE3A                | ENST00000359062 | p.S852T | c.2555G>C | Verified   | ACT | AGT | GCT | 2 | G | C |

|              |            |                 |          |           |            |     |     |     |   |   |   |
|--------------|------------|-----------------|----------|-----------|------------|-----|-----|-----|---|---|---|
| TCGA-13-1501 | PDE3A      | ENST00000359062 | p.S852T  | c.2555G>C | Verified   | ACT | AGT | GCT | 2 | G | C |
| TCGA-61-1740 | PDE4D      | ENST00000360047 | p.E396Q  | c.1186G>C | Unverified | TTA | GAG | AAC | 1 | G | C |
| TCGA-61-1740 | PDE4D_ENS' | ENST00000340635 | p.E532Q  | c.1594G>C | Unverified | TTA | GAG | AAC | 1 | G | C |
| TCGA-61-1740 | PDE4D_ENS' | ENST00000360047 | p.E396Q  | c.1186G>C | Unverified | TTA | GAG | AAC | 1 | G | C |
| TCGA-61-1740 | PDE4D_ENS' | ENST00000405755 | p.E410Q  | c.1228G>C | Unverified | TTA | GAG | AAC | 1 | G | C |
| TCGA-61-1740 | PDE4D_ENS' | ENST00000502484 | p.E471Q  | c.1411G>C | Unverified | TTA | GAG | AAC | 1 | G | C |
| TCGA-61-1740 | PDE4D_ENS' | ENST00000503258 | p.E402Q  | c.1204G>C | Unverified | TTA | GAG | AAC | 1 | G | C |
| TCGA-61-1740 | PDE4D_ENS' | ENST00000507116 | p.E468Q  | c.1402G>C | Unverified | TTA | GAG | AAC | 1 | G | C |
| TCGA-09-2049 | PDLIM3     | ENST00000284770 | p.G215A  | c.644G>C  | Verified   | CTA | GGG | GAA | 2 | G | C |
| TCGA-23-1022 | PDSS2      | ENST00000369037 | p.V223L  | c.667G>C  | Verified   | TTG | GTA | CAA | 1 | G | C |
| TCGA-10-0930 | PDXP       | ENST00000215904 | p.E220D  | c.660G>C  | Verified   | TTC | GAG | TGC | 3 | G | C |
| TCGA-10-0930 | PDXP       | ENST00000215904 | p.E220D  | c.660G>C  | Verified   | TTC | GAG | TGC | 3 | G | C |
| TCGA-13-0916 | PDZRN3     | NM_015009.1     | p.V542L  | c.1624G>C | Verified   | agc | gtg | ctg | 1 | G | C |
| TCGA-29-1761 | PDZRN4     | ENST00000539469 | p.D457H  | c.1369G>C | Unverified | ATA | GAT | ATG | 1 | G | C |
| TCGA-29-1761 | PDZRN4_EN  | ENST00000402685 | p.D715H  | c.2143G>C | Unverified | ATA | GAT | ATG | 1 | G | C |
| TCGA-13-0883 | PELI3      | ENST00000320740 | p.W397S  | c.1190G>C | Unverified | CTA | TGG | CTT | 2 | G | C |
| TCGA-24-1470 | PENK       | ENST00000314922 | p.E258Q  | c.772G>C  | Verified   | ATG | GAA | AAA | 1 | G | C |
| TCGA-30-1718 | PER1       | ENST00000317276 | p.R1189R | c.3567G>C | Unverified | GTC | CGG | AAG | 3 | G | C |
| TCGA-25-2391 | PEX11G     | ENST00000221480 | p.L35L   | c.105G>C  | Unverified | GTT | CTG | GTT | 3 | G | C |
| TCGA-20-1683 | PEX16      | ENST00000241041 | p.G168A  | c.503G>C  | Unverified | GTG | GGG | AAG | 2 | G | C |
| TCGA-30-1855 | PFKFB1     | ENST00000375006 | p.E452Q  | c.1354G>C | Unverified | CCT | GAG | AAT | 1 | G | C |
| TCGA-25-2398 | PFKP       | ENST00000381125 | p.K627N  | c.1881G>C | Verified   | ATG | AAG | ACC | 3 | G | C |
| TCGA-24-2280 | PFN2       | ENST00000239940 | p.G104R  | c.310G>C  | Unverified | GTC | GGC | AGA | 1 | G | C |
| TCGA-23-1122 | PGLYRP1    | ENST00000008938 | p.A153P  | c.457G>C  | Verified   | CTG | GCC | TGC | 1 | G | C |
| TCGA-13-1510 | PGM2L1     | ENST00000298198 | p.E607D  | c.1821G>C | Unverified | ATA | GAG | AAT | 3 | G | C |
| TCGA-13-0793 | PHACTR1    | ENST00000332995 | p.E382Q  | c.1144G>C | Unverified | CAT | GAG | TCA | 1 | G | C |
| TCGA-09-2049 | PHC2       | ENST00000257118 | p.L750F  | c.2250G>C | Verified   | ccc | ttg | tca | 3 | G | C |
| TCGA-30-1718 | PHF20      | ENST00000374012 | p.Q1005H | c.3015G>C | Unverified | CAG | CAG | ATC | 3 | G | C |
| TCGA-24-0979 | PHF8       | ENST00000338154 | p.W786C  | c.2358G>C | Verified   | tac | tgg | aga | 3 | G | C |
| TCGA-09-2050 | PHKA1      | ENST00000373542 | p.R491T  | c.1472G>C | Verified   | AAT | AGA | ATG | 2 | G | C |
| TCGA-29-1699 | PHLDB2     | ENST00000412622 | p.A126P  | c.376G>C  | Unverified | AGA | GCA | GAC | 1 | G | C |
| TCGA-29-1699 | PHLDB2_EN  | ENST00000393923 | p.A153P  | c.457G>C  | Unverified | AGA | GCA | GAC | 1 | G | C |
| TCGA-29-1699 | PHLDB2_EN  | ENST00000431670 | p.A126P  | c.376G>C  | Unverified | AGA | GCA | GAC | 1 | G | C |
| TCGA-24-1435 | PI4K2B     | ENST00000264864 | p.L381F  | c.1143G>C | Unverified | AAT | TTG | ATT | 3 | G | C |

|              |            |                 |          |            |            |     |     |     |   |   |   |
|--------------|------------|-----------------|----------|------------|------------|-----|-----|-----|---|---|---|
| TCGA-25-2398 | PIK3IP1    | ENST00000215912 | p.V237V  | c.711G>C   | Verified   | GTC | GTG | GTC | 3 | G | C |
| TCGA-04-1651 | PITX2      | ENST00000306732 | p.S314T  | c.941G>C   | Unverified | ctg | agt | gct | 2 | G | C |
| TCGA-04-1651 | PITX2      | ENST00000306732 | p.S314T  | c.941G>C   | Unverified | ctg | agt | gct | 2 | G | C |
| TCGA-04-1651 | PITX2_ENST | ENST00000354925 | p.S307T  | c.920G>C   | Unverified | CTG | AGT | GCT | 2 | G | C |
| TCGA-04-1651 | PITX2_ENST | ENST00000354925 | p.S307T  | c.920G>C   | Unverified | CTG | AGT | GCT | 2 | G | C |
| TCGA-61-2008 | PIWIL3     | ENST00000332271 | p.R290P  | c.869G>C   | Verified   | CTC | CGA | ATA | 2 | G | C |
| TCGA-61-1998 | PKD1L2     | ENST00000337114 | p.R641T  | c.1922G>C  | Unverified | CTG | AGA | GGC | 2 | G | C |
| TCGA-61-1998 | PKD1L2_ENS | ENST00000525539 | p.R641T  | c.1922G>C  | Unverified | CTG | AGA | GGC | 2 | G | C |
| TCGA-10-0930 | PKHD1      | ENST00000371117 | p.V712L  | c.2134G>C  | Verified   | AAC | GTA | ACA | 1 | G | C |
| TCGA-10-0930 | PKHD1      | ENST00000371117 | p.V712L  | c.2134G>C  | Verified   | AAC | GTA | ACA | 1 | G | C |
| TCGA-24-1849 | PKHD1L1    | ENST00000378402 | p.A2349P | c.7045G>C  | Unverified | ATT | GCA | TCT | 1 | G | C |
| TCGA-61-1910 | PKHD1L1    | ENST00000378402 | p.V1707L | c.5119G>C  | Unverified | TCA | GTG | AAT | 1 | G | C |
| TCGA-25-1326 | PKHD1L1    | ENST00000378402 | p.R4073T | c.12218G>C | Verified   | GAA | AGG | TCT | 2 | G | C |
| TCGA-20-1685 | PKP4       | ENST00000389759 | p.V757V  | c.2271G>C  | Unverified | GAG | GTG | CCC | 3 | G | C |
| TCGA-23-1118 | PKP4       | ENST00000389759 | p.K171N  | c.513G>C   | Verified   | AGC | AAG | GCA | 3 | G | C |
| TCGA-23-1124 | PLA2G4F    | ENST00000382396 | p.C675S  | c.2024G>C  | Verified   | GAC | TGC | CTG | 2 | G | C |
| TCGA-13-1510 | PLB1       | ENST00000327757 | p.L725F  | c.2175G>C  | Verified   | GCC | TTG | CAC | 3 | G | C |
| TCGA-25-1313 | PLD5       | ENST00000366545 | p.E336Q  | c.1006G>C  | Verified   | AAA | GAA | CAA | 1 | G | C |
| TCGA-30-1718 | PLEKHG1    | ENST00000358517 | p.G647R  | c.1939G>C  | Unverified | TTT | GGG | TCA | 1 | G | C |
| TCGA-13-0923 | PLSCR1     | ENST00000342435 | p.D301H  | c.901G>C   | Verified   | ATT | GAC | TTC | 1 | G | C |
| TCGA-23-1114 | PLXDC2     | ENST00000377252 | p.V473V  | c.1419G>C  | Unverified | CTT | GTG | ACA | 3 | G | C |
| TCGA-09-2049 | PLXNA2     | ENST00000367033 | p.G632R  | c.1894G>C  | Verified   | TTT | GGG | CTG | 1 | G | C |
| TCGA-29-1761 | PLXNA4_EN  | ENST00000321063 | p.A589P  | c.1765G>C  | Unverified | TCA | GCT | GGC | 1 | G | C |
| TCGA-29-1761 | PLXNA4_EN  | ENST00000321063 | p.A589P  | c.1765G>C  | Unverified | TCA | GCT | GGC | 1 | G | C |
| TCGA-13-1498 | PLXNB1     | ENST00000296440 | p.L1983L | c.5949G>C  | Verified   | CCT | CTG | AGG | 3 | G | C |
| TCGA-04-1342 | PM20D1     | ENST00000367136 | p.G143A  | c.428G>C   | Unverified | TCT | GGG | TTG | 2 | G | C |
| TCGA-24-2024 | PMPCA      | ENST00000371717 | p.K269N  | c.807G>C   | Unverified | CGG | AAG | TAC | 3 | G | C |
| TCGA-13-0924 | PMPCB      | ENST00000249269 | p.S282T  | c.845G>C   | Verified   | GGA | AGT | GAG | 2 | G | C |
| TCGA-24-1846 | POC1B      | ENST00000313546 | p.G198A  | c.593G>C   | Unverified | AGT | GGT | ACA | 2 | G | C |
| TCGA-10-0930 | POGLUT1    | ENST00000295588 | p.?      | c.639-1G>C | Verified   | TCA | AGG | ACA | 3 | G | C |
| TCGA-10-0930 | POGLUT1    | ENST00000295588 | p.?      | c.639-1G>C | Verified   | TCA | AGG | ACA | 3 | G | C |
| TCGA-13-0919 | POLI       | NM_007195.1     | p.R28T   | c.83G>C    | Unverified | tcc | aga | gtc | 2 | G | C |
| TCGA-61-2012 | POLR3E     | ENST00000299853 | p.V239L  | c.715G>C   | Verified   | CTC | GTC | AAG | 1 | G | C |
| TCGA-23-1124 | POU4F1     | ENST00000377208 | p.E348Q  | c.1042G>C  | Verified   | CCT | GAG | CTC | 1 | G | C |



|              |            |                 |         |            |            |     |     |     |   |   |   |
|--------------|------------|-----------------|---------|------------|------------|-----|-----|-----|---|---|---|
| TCGA-09-1674 | POU4F1     | ENST00000377208 | p.M344I | c.1032G>C  | Unverified | AAA | ATG | AAC | 3 | G | C |
| TCGA-04-1336 | PPAN-P2RY1 | ENST00000393796 | p.G445G | c.1335G>C  | Verified   | AGT | GGG | TTC | 3 | G | C |
| TCGA-04-1651 | PPFIA1     | ENST00000253925 | p.G667A | c.2000G>C  | Unverified | agt | gga | agt | 2 | G | C |
| TCGA-04-1651 | PPFIA1     | ENST00000253925 | p.G667A | c.2000G>C  | Unverified | agt | gga | agt | 2 | G | C |
| TCGA-04-1337 | PPHLN1     | ENST00000358314 | p.R125T | c.374G>C   | Unverified | AAA | AGG | GAC | 2 | G | C |
| TCGA-29-1777 | PPM1F      | ENST00000263212 | p.A395P | c.1183G>C  | Unverified | gtg | gct | gcg | 1 | G | C |
| TCGA-25-2391 | PPP1R12B   | NM_032105.1     | p.R114T | c.341G>C   | Unverified | aac | aga | gcc | 2 | G | C |
| TCGA-29-1783 | PPP1R15A   | ENST00000200453 | p.V513L | c.1537G>C  | Unverified | TAT | GTA | CCT | 1 | G | C |
| TCGA-29-1783 | PPP1R15A   | ENST00000200453 | p.D367H | c.1099G>C  | Unverified | TCA | GAT | GAG | 1 | G | C |
| TCGA-29-1783 | PPP1R15A   | ENST00000200453 | p.V569L | c.1705G>C  | Unverified | GCT | GTC | TGG | 1 | G | C |
| TCGA-29-1783 | PPP1R15A   | ENST00000200453 | p.E489D | c.1467G>C  | Unverified | AAA | GAG | ACA | 3 | G | C |
| TCGA-30-1718 | PPP1R15B   | ENST00000367188 | p.Q610H | c.1830G>C  | Unverified | GTG | CAG | CTG | 3 | G | C |
| TCGA-13-1501 | PPP1R3F    | ENST00000055335 | p.V382L | c.1144G>C  | Verified   | cag | gtt | tct | 1 | G | C |
| TCGA-13-1501 | PPP1R3F    | ENST00000055335 | p.V382L | c.1144G>C  | Verified   | cag | gtt | tct | 1 | G | C |
| TCGA-24-2267 | PPP1R9A    | XM_374491.1     | p.L602F | c.1806G>C  | Verified   | cag | ttg | ata | 3 | G | C |
| TCGA-23-1117 | PRAMEF20   | ENST00000316412 | p.R47T  | c.140G>C   | Verified   | AGG | AGA | CAC | 2 | G | C |
| TCGA-23-1117 | PRAMEF20   | ENST00000316412 | p.R47T  | c.140G>C   | Verified   | AGG | AGA | CAC | 2 | G | C |
| TCGA-23-1032 | PRAMEF4    | ENST00000235349 | p.D366H | c.1096G>C  | Verified   | ATA | GAC | TCC | 1 | G | C |
| TCGA-24-2289 | PRB3       | ENST00000381842 | p.G97A  | c.290G>C   | Unverified | CCG | GGA | AAG | 2 | G | C |
| TCGA-61-1740 | PRKAA2     | ENST00000371244 | p.L170L | c.510G>C   | Unverified | TTT | CTG | AGA | 3 | G | C |
| TCGA-61-1740 | PRKAA2_EN  | ENST00000371244 | p.L170L | c.510G>C   | Unverified | TTT | CTG | AGA | 3 | G | C |
| TCGA-20-1687 | PRKACA     | ENST00000308677 | p.?     | c.644-1G>C | Unverified | aaa | ggc | tac | 2 | G | C |
| TCGA-20-1687 | PRKACA_EN  | ENST00000350356 | p.G207R | c.619G>C   | Unverified | AAA | GGC | TAC | 1 | G | C |
| TCGA-20-1685 | PRKACB     | ENST00000370689 | p.M232I | c.696G>C   | Unverified | gaa | atg | gca | 3 | G | C |
| TCGA-20-1685 | PRKACB_EN  | ENST00000370685 | p.M279I | c.837G>C   | Unverified | GAA | ATG | GCA | 3 | G | C |
| TCGA-20-1685 | PRKACB_EN  | ENST00000370688 | p.M232I | c.696G>C   | Unverified | GAA | ATG | GCA | 3 | G | C |
| TCGA-20-1685 | PRKACB_EN  | ENST00000394838 | p.M239I | c.717G>C   | Unverified | GAA | ATG | GCA | 3 | G | C |
| TCGA-25-1326 | PRKD2      | ENST00000291281 | p.L662F | c.1986G>C  | Verified   | GCT | TTG | AGA | 3 | G | C |
| TCGA-29-1781 | PRPF38B    | ENST00000370025 | p.R442T | c.1325G>C  | Unverified | AGT | AGA | AAT | 2 | G | C |
| TCGA-24-1469 | PRPF8      | ENST00000304992 | p.R998P | c.2993G>C  | Verified   | CTG | CGC | CTC | 2 | G | C |
| TCGA-04-1356 | PRPH2      | ENST00000230381 | p.K154N | c.462G>C   | Verified   | AAG | AAG | ACC | 3 | G | C |
| TCGA-25-2042 | PRR23B     | ENST00000329447 | p.A65A  | c.195G>C   | Unverified | GCC | GCG | GGC | 3 | G | C |
| TCGA-24-1563 | PRSS36     | ENST00000268281 | p.D115H | c.343G>C   | Verified   | CTG | GAC | GGC | 1 | G | C |
| TCGA-61-2009 | PRUNE      | ENST00000271620 | p.E403D | c.1209G>C  | Verified   | GAG | GAG | GAC | 3 | G | C |

|              |            |                 |          |           |            |     |     |     |   |   |   |
|--------------|------------|-----------------|----------|-----------|------------|-----|-----|-----|---|---|---|
| TCGA-13-0904 | PRUNE2_EN  | ENST00000376718 | p.K1733N | c.5199G>C | Verified   | CCT | AAG | TCT | 3 | G | C |
| TCGA-09-2049 | PSENNEN    | ENST00000222266 | p.G89G   | c.267G>C  | Verified   | ctt | ggg | gac | 3 | G | C |
| TCGA-29-1763 | PSMB4      | ENST00000290541 | p.Q20H   | c.60G>C   | Unverified | GGA | CAG | TTT | 3 | G | C |
| TCGA-04-1338 | PSMC3      | ENST00000298852 | p.D98H   | c.292G>C  | Verified   | CTG | GAT | GTT | 1 | G | C |
| TCGA-29-1770 | PSMC3IP    | ENST00000253789 | p.L171L  | c.513G>C  | Unverified | GAG | CTG | TCT | 3 | G | C |
| TCGA-13-0900 | PSTPIP1    | ENST00000558012 | p.K34N   | c.102G>C  | Verified   | AGG | AAG | ATG | 3 | G | C |
| TCGA-13-0760 | PTCHD3     | ENST00000438700 | p.G626R  | c.1876G>C | Verified   | GAA | GGT | TTA | 1 | G | C |
| TCGA-13-1510 | PTGR1      | ENST00000309195 | p.V157L  | c.469G>C  | Unverified | TCA | GTC | GTG | 1 | G | C |
| TCGA-24-1849 | PTGS1_ENST | ENST00000362012 | p.E363Q  | c.1087G>C | Unverified | CCA | GAG | CTG | 1 | G | C |
| TCGA-09-2050 | PTH2R      | ENST00000272847 | p.E527Q  | c.1579G>C | Verified   | ATG | GAG | AAG | 1 | G | C |
| TCGA-13-1408 | PTK2B      | ENST00000397501 | p.E438Q  | c.1312G>C | Unverified | GGG | GAG | GTC | 1 | G | C |
| TCGA-29-1693 | PTK2B      | ENST00000397501 | p.E88Q   | c.262G>C  | Unverified | GCT | GAG | TGC | 1 | G | C |
| TCGA-13-1408 | PTK2B_ENST | ENST00000397497 | p.E184Q  | c.550G>C  | Unverified | GGG | GAG | GTC | 1 | G | C |
| TCGA-29-1693 | PTK2B_ENST | ENST00000544172 | p.E88Q   | c.262G>C  | Unverified | GCT | GAG | TGC | 1 | G | C |
| TCGA-04-1530 | PTPDC1     | ENST00000288976 | p.V272L  | c.814G>C  | Unverified | ttt | gtg | cgg | 1 | G | C |
| TCGA-24-1845 | PTPRB      | NM_002837.2     | p.R312T  | c.935G>C  | Unverified | caa | aga | cct | 2 | G | C |
| TCGA-24-1845 | PTPRB_ENST | ENST00000261266 | p.R312T  | c.935G>C  | Unverified | CAA | AGA | CCT | 2 | G | C |
| TCGA-24-1845 | PTPRB_ENST | ENST00000334414 | p.R530T  | c.1589G>C | Unverified | CAA | AGA | CCT | 2 | G | C |
| TCGA-23-1022 | PTPRN      | ENST00000295718 | p.V577V  | c.1731G>C | Verified   | tca | gtg | ctg | 3 | G | C |
| TCGA-04-1347 | PTPRN2     | NM_002847.2     | p.A251P  | c.751G>C  | Verified   | gct | gcc | cag | 1 | G | C |
| TCGA-13-0760 | PTTG1IP    | ENST00000330938 | p.G106R  | c.316G>C  | Verified   | GTC | GGG | GGA | 1 | G | C |
| TCGA-29-1761 | PUM2       | ENST00000338086 | p.G391A  | c.1172G>C | Unverified | GCA | GGT | CAG | 2 | G | C |
| TCGA-13-0760 | PUS1       | ENST00000376649 | p.W15C   | c.45G>C   | Unverified | CGG | TGG | ACC | 3 | G | C |
| TCGA-61-1740 | PUS3       | ENST00000227474 | p.Q126H  | c.378G>C  | Unverified | GGA | CAG | GTG | 3 | G | C |
| TCGA-24-2289 | PXN        | ENST00000424649 | p.E241D  | c.723G>C  | Unverified | GGC | GAG | ATG | 3 | G | C |
| TCGA-29-1705 | Q69YJ1_HUI | ENST00000290422 | p.E31D   | c.93G>C   | Unverified | TGC | GAG | CTC | 3 | G | C |
| TCGA-29-1761 | Q8N8K0_HL  | ENST00000301807 | p.R1700P | c.5099G>C | Unverified | TTC | CGG | TTC | 2 | G | C |
| TCGA-25-1326 | Q96K91_HU  | ENST00000288841 | p.G419A  | c.1256G>C | Verified   | GCT | GGA | GCC | 2 | G | C |
| TCGA-13-0905 | QSER1      | ENST00000399302 | p.G1180R | c.3538G>C | Verified   | CCA | GGG | ACC | 1 | G | C |
| TCGA-25-2400 | RABGAP1L   | ENST00000251507 | p.V813L  | c.2437G>C | Verified   | TTT | GTA | TAT | 1 | G | C |
| TCGA-13-1507 | RAD18      | ENST00000264926 | p.R489T  | c.1466G>C | Verified   | CCA | AGA | AAC | 2 | G | C |
| TCGA-20-1687 | RAD21      | ENST00000297338 | p.E34Q   | c.100G>C  | Unverified | ttc | gag | tgt | 1 | G | C |
| TCGA-04-1331 | RAD50      | NM_133482.1     | p.E292D  | c.876G>C  | Unverified | gat | gag | ata | 3 | G | C |
| TCGA-24-1846 | RALGAPA2   | ENST00000202677 | p.D941H  | c.2821G>C | Unverified | GGA | GAT | GTG | 1 | G | C |

|              |            |                 |          |           |            |     |     |     |   |   |   |
|--------------|------------|-----------------|----------|-----------|------------|-----|-----|-----|---|---|---|
| TCGA-24-1846 | RALGAPA2_  | ENST00000202677 | p.D941H  | c.2821G>C | Unverified | GGA | GAT | GTG | 1 | G | C |
| TCGA-61-1910 | RALGDS     | ENST00000372050 | p.L585L  | c.1755G>C | Unverified | tat | ctg | tat | 3 | G | C |
| TCGA-29-1691 | RANBP2     | ENST00000283195 | p.A655P  | c.1963G>C | Unverified | TTT | GCT | ATA | 1 | G | C |
| TCGA-29-1691 | RANBP2_EN  | ENST00000283195 | p.A655P  | c.1963G>C | Unverified | TTT | GCT | ATA | 1 | G | C |
| TCGA-29-1769 | RAP2A      | ENST00000245304 | p.A59P   | c.175G>C  | Unverified | acg | gcg | ggc | 1 | G | C |
| TCGA-24-1844 | RAPGEFL1   | ENST00000264644 | p.R325P  | c.974G>C  | Unverified | ctt | cga | ctc | 2 | G | C |
| TCGA-13-1481 | RARA       | ENST00000254066 | p.K380N  | c.1140G>C | Verified   | atg | aag | att | 3 | G | C |
| TCGA-29-1761 | RARG       | ENST00000425354 | p.A313P  | c.937G>C  | Unverified | ttt | gcc | ttt | 1 | G | C |
| TCGA-24-1104 | RASAL2     | ENST00000263528 | p.E526D  | c.1578G>C | Verified   | GGG | GAG | TTT | 3 | G | C |
| TCGA-23-1117 | RASGRF1    | ENST00000419573 | p.E254Q  | c.760G>C  | Verified   | gct | gag | tac | 1 | G | C |
| TCGA-23-1117 | RASGRF1    | ENST00000419573 | p.E254Q  | c.760G>C  | Verified   | gct | gag | tac | 1 | G | C |
| TCGA-29-1711 | RASGRP3_EI | ENST00000403687 | p.E622D  | c.1866G>C | Unverified | TCA | GAG | GCT | 3 | G | C |
| TCGA-29-1711 | RASGRP3_EI | ENST00000403687 | p.E622D  | c.1866G>C | Unverified | TCA | GAG | GCT | 3 | G | C |
| TCGA-04-1638 | RB1        | ENST00000267163 | p.A562P  | c.1684G>C | Unverified | CTT | GCA | TGG | 1 | G | C |
| TCGA-24-1469 | RB1        | ENST00000267163 | p.R763T  | c.2288G>C | Unverified | CAG | AGA | CTG | 2 | G | C |
| TCGA-04-1638 | RB1_ENST00 | ENST00000267163 | p.A562P  | c.1684G>C | Unverified | CTT | GCA | TGG | 1 | G | C |
| TCGA-24-1469 | RB1_ENST00 | ENST00000267163 | p.R763T  | c.2288G>C | Unverified | CAG | AGA | CTG | 2 | G | C |
| TCGA-10-0930 | RBL1       | ENST00000373664 | p.K794N  | c.2382G>C | Verified   | aga | aag | gtc | 3 | G | C |
| TCGA-10-0930 | RBL1       | ENST00000373664 | p.K794N  | c.2382G>C | Verified   | aga | aag | gtc | 3 | G | C |
| TCGA-61-2008 | RBM15      | ENST00000369784 | p.G563R  | c.1687G>C | Verified   | AGG | GGT | GCT | 1 | G | C |
| TCGA-61-1740 | RBM28      | ENST00000223073 | p.Q390H  | c.1170G>C | Unverified | GCT | CAG | AAA | 3 | G | C |
| TCGA-29-1764 | RBM39      | ENST00000253363 | p.G383A  | c.1148G>C | Unverified | AGT | GGC | TCT | 2 | G | C |
| TCGA-20-0991 | RBM44      | ENST00000316997 | p.G13R   | c.37G>C   | Verified   | TCT | GGT | AAA | 1 | G | C |
| TCGA-23-1114 | RBM45      | ENST00000286070 | p.G10R   | c.28G>C   | Unverified | AGC | GGC | GGG | 1 | G | C |
| TCGA-04-1356 | RBP5       | ENST00000266560 | p.G68R   | c.202G>C  | Verified   | GTG | GGA | GTG | 1 | G | C |
| TCGA-23-1124 | RBPMS      | ENST00000287771 | p.R24R   | c.72G>C   | Verified   | GTC | CGG | ACC | 3 | G | C |
| TCGA-61-2113 | RCOR1      | ENST00000570597 | p.D147H  | c.439G>C  | Verified   | TTG | GAT | GAA | 1 | G | C |
| TCGA-09-1674 | RDH14      | ENST00000381249 | p.K152N  | c.456G>C  | Unverified | ATG | AAG | ACT | 3 | G | C |
| TCGA-24-2289 | RECQL      | ENST00000444129 | p.S568S  | c.1704G>C | Unverified | ATT | TCG | TAT | 3 | G | C |
| TCGA-24-1417 | REL        | ENST00000295025 | p.E38Q   | c.112G>C  | Verified   | ggg | gag | cac | 1 | G | C |
| TCGA-13-0760 | RELA       | ENST00000406246 | p.E127Q  | c.379G>C  | Verified   | CTG | GAG | CAG | 1 | G | C |
| TCGA-04-1338 | REV1       | ENST00000258428 | p.A1035A | c.3105G>C | Verified   | GCA | GCG | TAT | 3 | G | C |
| TCGA-23-1031 | RFX2       | ENST00000303657 | p.V549L  | c.1645G>C | Verified   | AAC | GTG | CAG | 1 | G | C |
| TCGA-09-1674 | RFX3       | ENST00000358730 | p.R498T  | c.1493G>C | Unverified | CGA | AGA | TAC | 2 | G | C |

|              |             |                 |          |           |            |     |     |     |   |   |   |
|--------------|-------------|-----------------|----------|-----------|------------|-----|-----|-----|---|---|---|
| TCGA-09-1674 | RFX3_ENSTC  | ENST00000382004 | p.R498T  | c.1493G>C | Unverified | CGA | AGA | TAC | 2 | G | C |
| TCGA-23-2078 | RG9MTD2     | ENST00000394876 | p.E257Q  | c.769G>C  | Verified   | CTG | GAA | TAC | 1 | G | C |
| TCGA-13-0885 | RGL1        | ENST00000304685 | p.S585T  | c.1754G>C | Verified   | GAA | AGC | ATG | 2 | G | C |
| TCGA-29-1770 | RGS20       | ENST00000297313 | p.M369I  | c.1107G>C | Unverified | ttc | atg | aac | 3 | G | C |
| TCGA-29-1770 | RGS20_ENST  | ENST00000276500 | p.M222I  | c.666G>C  | Unverified | TTC | ATG | AAC | 3 | G | C |
| TCGA-10-0930 | RHOT1       | ENST00000358365 | p.D106H  | c.316G>C  | Verified   | ACA | GAC | AAA | 1 | G | C |
| TCGA-10-0930 | RHOT1       | ENST00000358365 | p.D106H  | c.316G>C  | Verified   | ACA | GAC | AAA | 1 | G | C |
| TCGA-23-1031 | RHOT1       | ENST00000358365 | p.V418L  | c.1252G>C | Verified   | AAT | GTG | TTC | 1 | G | C |
| TCGA-61-1998 | RIC3        | ENST00000343202 | p.A319P  | c.955G>C  | Verified   | AAT | GCT | GGA | 1 | G | C |
| TCGA-61-2008 | RIF1        | ENST00000444746 | p.D492H  | c.1474G>C | Verified   | aaa | gat | gcc | 1 | G | C |
| TCGA-23-1122 | RIMS4       | ENST00000372851 | p.E222Q  | c.664G>C  | Verified   | GAG | GAG | CTG | 1 | G | C |
| TCGA-23-1022 | RIMS4       | ENST00000372851 | p.E222D  | c.666G>C  | Verified   | GAG | GAG | CTG | 3 | G | C |
| TCGA-29-1693 | RINT1       | ENST00000257700 | p.D31H   | c.91G>C   | Unverified | AGT | GAC | ATA | 1 | G | C |
| TCGA-13-1510 | RIOK3       | ENST00000339486 | p.R178T  | c.533G>C  | Verified   | GCA | AGA | ATG | 2 | G | C |
| TCGA-13-0904 | RLTPR_ENST  | ENST00000334583 | p.G376R  | c.1126G>C | Verified   | GCA | GGC | ACC | 1 | G | C |
| TCGA-13-0760 | RMND5A      | ENST00000283632 | p.M182I  | c.546G>C  | Verified   | GAA | ATG | CTT | 3 | G | C |
| TCGA-24-1845 | RNF112      | ENST00000299604 | p.R63S   | c.189G>C  | Unverified | GAG | AGG | TTG | 3 | G | C |
| TCGA-13-1496 | RNF13       | ENST00000392894 | p.A114P  | c.340G>C  | Verified   | AGA | GCA | GGA | 1 | G | C |
| TCGA-04-1655 | RNF180      | ENST00000296615 | p.R392T  | c.1175G>C | Unverified | GAA | AGA | TGG | 2 | G | C |
| TCGA-04-1655 | RNF180_ENST | ENST00000389100 | p.R392T  | c.1175G>C | Unverified | GAA | AGA | TGG | 2 | G | C |
| TCGA-13-0893 | RNF20       | ENST00000389120 | p.E427D  | c.1281G>C | Verified   | gat | gag | gtt | 3 | G | C |
| TCGA-29-1769 | ROMO1       | ENST00000336695 | p.G38A   | c.113G>C  | Unverified | TTC | GGC | ACC | 2 | G | C |
| TCGA-23-1114 | ROPN1       | ENST00000184183 | p.D102H  | c.304G>C  | Unverified | ACA | GAT | CTG | 1 | G | C |
| TCGA-13-1510 | RORA        | ENST00000261523 | p.K107N  | c.321G>C  | Unverified | TGC | AAG | ATC | 3 | G | C |
| TCGA-61-2095 | RP1L1       | ENST00000382483 | p.R692P  | c.2075G>C | Unverified | GAG | CGG | CGA | 2 | G | C |
| TCGA-04-1651 | RPGR_ENST1  | ENST00000378505 | p.G1073A | c.3218G>C | Unverified | ACA | GGC | GAA | 2 | G | C |
| TCGA-04-1651 | RPGR_ENST1  | ENST00000378505 | p.G1073A | c.3218G>C | Unverified | ACA | GGC | GAA | 2 | G | C |
| TCGA-29-1702 | RPGRIP1_EN  | ENST00000400017 | p.E629Q  | c.1885G>C | Unverified | TTT | GAA | CTG | 1 | G | C |
| TCGA-24-1463 | RPGRIP1L    | ENST00000379925 | p.D457H  | c.1369G>C | Unverified | GCT | GAT | GAA | 1 | G | C |
| TCGA-24-1435 | RPL23A      | ENST00000422514 | p.E133D  | c.399G>C  | Verified   | GGA | GAG | AAG | 3 | G | C |
| TCGA-29-1785 | RPLP1       | ENST00000260379 | p.E103D  | c.309G>C  | Unverified | GAG | GAG | TCT | 3 | G | C |
| TCGA-29-1785 | RPLP1       | ENST00000260379 | p.E103D  | c.309G>C  | Unverified | GAG | GAG | TCT | 3 | G | C |
| TCGA-61-2095 | RREB1       | ENST00000379933 | p.R51R   | c.153G>C  | Unverified | AAT | CGG | ATT | 3 | G | C |
| TCGA-23-1123 | RRH         | ENST00000317735 | p.V319L  | c.955G>C  | Verified   | CCT | GTG | ACA | 1 | G | C |

|              |            |                 |          |            |            |     |     |     |   |   |   |
|--------------|------------|-----------------|----------|------------|------------|-----|-----|-----|---|---|---|
| TCGA-23-1123 | RRH        | ENST00000317735 | p.V319L  | c.955G>C   | Verified   | CCT | GTG | ACA | 1 | G | C |
| TCGA-04-1362 | RTF1       | ENST00000260373 | p.D538H  | c.1612G>C  | Verified   | CAC | GAT | TTT | 1 | G | C |
| TCGA-10-0930 | RUFY1      | ENST00000437570 | p.E261Q  | c.781G>C   | Verified   | CGA | GAA | AGA | 1 | G | C |
| TCGA-10-0930 | RUFY1      | ENST00000437570 | p.E261Q  | c.781G>C   | Verified   | CGA | GAA | AGA | 1 | G | C |
| TCGA-13-1498 | RUFY1      | ENST00000437570 | p.S569T  | c.1706G>C  | Verified   | TCC | AGC | AAC | 2 | G | C |
| TCGA-24-1422 | RUSC2      | ENST00000361226 | p.C1328S | c.3983G>C  | Unverified | GCC | TGC | CCT | 2 | G | C |
| TCGA-24-2262 | RWDD3      | ENST00000370202 | p.V34L   | c.100G>C   | Verified   | ACC | GTG | TTC | 1 | G | C |
| TCGA-04-1655 | RYR2       | ENST00000366574 | p.E712Q  | c.2134G>C  | Unverified | GAA | GAG | TGG | 1 | G | C |
| TCGA-13-0923 | RYR2       | ENST00000366574 | p.E2338Q | c.7012G>C  | Verified   | GGA | GAA | GGT | 1 | G | C |
| TCGA-29-1761 | RYR2       | ENST00000366574 | p.D2885H | c.8653G>C  | Unverified | AAG | GAT | AGA | 1 | G | C |
| TCGA-13-0885 | RYR2       | ENST00000366574 | p.E3487D | c.10461G>C | Verified   | CAG | GAG | CTC | 3 | G | C |
| TCGA-29-1769 | RYR2       | ENST00000366574 | p.L4462F | c.13386G>C | Unverified | AAG | TTG | AGG | 3 | G | C |
| TCGA-30-1891 | RYR2       | ENST00000366574 | p.K3471N | c.10413G>C | Unverified | CTG | AAG | CGG | 3 | G | C |
| TCGA-04-1342 | S1PR3      | ENST00000375846 | p.D333H  | c.997G>C   | Unverified | CTC | GAC | CCA | 1 | G | C |
| TCGA-13-1510 | SACS       | NM_014363.3     | p.E871D  | c.2613G>C  | Verified   | ctt | gag | aat | 3 | G | C |
| TCGA-61-2109 | SAMD9      | ENST00000379958 | p.R759T  | c.2276G>C  | Unverified | TTC | AGA | TGT | 2 | G | C |
| TCGA-24-1850 | SAMD9L     | ENST00000318238 | p.W481S  | c.1442G>C  | Unverified | ATG | TGG | GAG | 2 | G | C |
| TCGA-29-1698 | SAP130     | ENST00000259235 | p.K1045N | c.3135G>C  | Unverified | CGA | AAG | GAA | 3 | G | C |
| TCGA-29-1698 | SAP130_ENS | ENST00000357702 | p.K1080N | c.3240G>C  | Unverified | CGA | AAG | GAA | 3 | G | C |
| TCGA-61-1740 | SARDH      | ENST00000371872 | p.K558N  | c.1674G>C  | Unverified | ATC | AAG | AAG | 3 | G | C |
| TCGA-24-2267 | SBF1       | ENST00000390679 | p.R562P  | c.1685G>C  | Unverified | CGG | CGG | CTG | 2 | G | C |
| TCGA-13-0795 | SCAMP2     | ENST00000268099 | p.G243A  | c.728G>C   | Verified   | CTG | GGG | GAC | 2 | G | C |
| TCGA-13-0905 | SCAMP3     | ENST00000302631 | p.R5T    | c.14G>C    | Verified   | AGC | AGA | GAC | 2 | G | C |
| TCGA-13-1512 | SCARA3     | ENST00000301904 | p.G523A  | c.1568G>C  | Verified   | AAA | GGC | TCA | 2 | G | C |
| TCGA-23-1117 | SCEL       | ENST00000349847 | p.D236H  | c.706G>C   | Verified   | CTT | GAT | AAC | 1 | G | C |
| TCGA-23-1117 | SCEL       | ENST00000349847 | p.D236H  | c.706G>C   | Verified   | CTT | GAT | AAC | 1 | G | C |
| TCGA-13-1498 | SCG3       | ENST00000220478 | p.V12V   | c.36G>C    | Verified   | CTG | GTG | TTA | 3 | G | C |
| TCGA-29-1691 | SCN3A      | ENST00000283254 | p.D1066H | c.3196G>C  | Unverified | AGA | GAT | GGG | 1 | G | C |
| TCGA-29-1691 | SCN3A_ENS  | ENST00000409101 | p.D1017H | c.3049G>C  | Unverified | AGA | GAT | GGG | 1 | G | C |
| TCGA-09-1674 | SCRN1      | ENST00000242059 | p.D231H  | c.691G>C   | Unverified | GAG | GAT | CAT | 1 | G | C |
| TCGA-09-1674 | SCRN1_ENS  | ENST00000434476 | p.D251H  | c.751G>C   | Unverified | GAG | GAT | CAT | 1 | G | C |
| TCGA-24-1422 | SCRN3      | ENST00000272732 | p.G252R  | c.754G>C   | Verified   | AAA | GGA | AAT | 1 | G | C |
| TCGA-04-1338 | SCUBE3     | ENST00000274938 | p.D279H  | c.835G>C   | Unverified | ATA | GAT | GAG | 1 | G | C |
| TCGA-13-1497 | SDC1       | ENST00000254351 | p.V25L   | c.73G>C    | Verified   | ATT | GTG | GCT | 1 | G | C |

|              |            |                 |          |           |            |     |     |     |   |   |   |
|--------------|------------|-----------------|----------|-----------|------------|-----|-----|-----|---|---|---|
| TCGA-23-1124 | SDC1       | ENST00000254351 | p.G36A   | c.107G>C  | Verified   | GAT | GGC | TCT | 2 | G | C |
| TCGA-13-0903 | SDCBP2_EN  | ENST00000381812 | p.D10H   | c.28G>C   | Verified   | GAG | GAC | CTA | 1 | G | C |
| TCGA-04-1651 | SEC31A_EN  | ENST00000395310 | p.L1153L | c.3459G>C | Unverified | TTT | CTG | TAT | 3 | G | C |
| TCGA-04-1651 | SEC31A_EN  | ENST00000395310 | p.L1153L | c.3459G>C | Unverified | TTT | CTG | TAT | 3 | G | C |
| TCGA-04-1651 | SEC31A_EN  | ENST00000432794 | p.L1166L | c.3498G>C | Unverified | TTT | CTG | TAT | 3 | G | C |
| TCGA-04-1651 | SEC31A_EN  | ENST00000432794 | p.L1166L | c.3498G>C | Unverified | TTT | CTG | TAT | 3 | G | C |
| TCGA-24-1417 | SEC62      | ENST00000337002 | p.V24L   | c.70G>C   | Verified   | GCT | GTG | GCC | 1 | G | C |
| TCGA-04-1367 | SECISBP2   | ENST00000375807 | p.Q110H  | c.330G>C  | Verified   | TCC | CAG | TAT | 3 | G | C |
| TCGA-20-1683 | SELENBP1   | ENST00000368868 | p.G161A  | c.482G>C  | Unverified | AAA | GGG | GGT | 2 | G | C |
| TCGA-23-1122 | SEMA3D     | ENST00000284136 | p.R634P  | c.1901G>C | Verified   | CAT | CGA | GAG | 2 | G | C |
| TCGA-13-0923 | SEMA3E     | ENST00000307792 | p.V72L   | c.214G>C  | Verified   | TTC | GTG | GGA | 1 | G | C |
| TCGA-13-0714 | SEMA4F     | ENST00000357877 | p.A230P  | c.688G>C  | Verified   | GCA | GCC | GTG | 1 | G | C |
| TCGA-24-1847 | SEMG2      | ENST00000372769 | p.V223L  | c.667G>C  | Unverified | AAT | GTG | GTT | 1 | G | C |
| TCGA-24-1474 | SERINC1    | ENST00000368454 | p.V79L   | c.235G>C  | Verified   | GTT | GTC | CCT | 1 | G | C |
| TCGA-13-0792 | SERPINA4   | ENST00000557004 | p.K193N  | c.579G>C  | Verified   | GGG | AAG | ATT | 3 | G | C |
| TCGA-13-0905 | SERPINA5   | ENST00000553780 | p.D51H   | c.151G>C  | Verified   | TTT | GAC | CTC | 1 | G | C |
| TCGA-29-1764 | SERPINB13  | ENST00000344731 | p.E199D  | c.597G>C  | Unverified | gaa | gag | aaa | 3 | G | C |
| TCGA-29-1785 | SERPINB2   | ENST00000299502 | p.A135A  | c.405G>C  | Unverified | tct | gcg | agc | 3 | G | C |
| TCGA-29-1785 | SERPINB2   | ENST00000299502 | p.A135A  | c.405G>C  | Unverified | tct | gcg | agc | 3 | G | C |
| TCGA-30-1856 | SERPINB8   | ENST00000397985 | p.G151A  | c.452G>C  | Unverified | gct | ggg | aca | 2 | G | C |
| TCGA-24-1845 | SERPIND1   | ENST00000215727 | p.V177L  | c.529G>C  | Unverified | CAA | GTG | CAC | 1 | G | C |
| TCGA-24-1845 | SERPIND1_E | ENST00000215727 | p.V177L  | c.529G>C  | Unverified | CAA | GTG | CAC | 1 | G | C |
| TCGA-25-1318 | SESN1      | ENST00000436639 | p.G104R  | c.310G>C  | Verified   | cta | gga | cag | 1 | G | C |
| TCGA-25-1318 | SESN1      | ENST00000436639 | p.G104R  | c.310G>C  | Verified   | cta | gga | cag | 1 | G | C |
| TCGA-61-1907 | SETD1A     | ENST00000262519 | p.T213T  | c.639G>C  | Unverified | GAG | ACG | GCC | 3 | G | C |
| TCGA-09-1674 | SETD2      | ENST00000330022 | p.V1694L | c.5080G>C | Unverified | CCA | GTG | TGT | 1 | G | C |
| TCGA-09-1674 | SETD2_EN   | ENST00000409792 | p.V2197L | c.6589G>C | Unverified | CCA | GTG | TGT | 1 | G | C |
| TCGA-23-1029 | SETDB1     | ENST00000271640 | p.L205L  | c.615G>C  | Unverified | ATT | CTG | GGC | 3 | G | C |
| TCGA-23-1029 | SETDB1_EN  | ENST00000271640 | p.L205L  | c.615G>C  | Unverified | ATT | CTG | GGC | 3 | G | C |
| TCGA-24-2288 | SFMBT2     | ENST00000361972 | p.Q71H   | c.213G>C  | Unverified | ATT | CAG | AGC | 3 | G | C |
| TCGA-13-1512 | SFRP2      | ENST00000274063 | p.S272S  | c.816G>C  | Verified   | ACC | TCG | GTG | 3 | G | C |
| TCGA-09-2050 | SGCA       | ENST00000262018 | p.E190D  | c.570G>C  | Verified   | ATT | GAG | GGC | 3 | G | C |
| TCGA-13-0887 | SGSM3      | ENST00000248929 | p.E672Q  | c.2014G>C | Verified   | CTG | GAG | GTG | 1 | G | C |
| TCGA-13-0900 | SGTA       | ENST00000221566 | p.E187D  | c.561G>C  | Verified   | CTG | GAG | CTG | 3 | G | C |

|              |            |                 |         |           |            |     |     |     |   |   |   |
|--------------|------------|-----------------|---------|-----------|------------|-----|-----|-----|---|---|---|
| TCGA-29-1696 | SH2B1      | ENST00000337120 | p.S430T | c.1289G>C | Unverified | GAG | AGC | AAT | 2 | G | C |
| TCGA-29-1696 | SH2B1      | ENST00000337120 | p.S430T | c.1289G>C | Unverified | GAG | AGC | AAT | 2 | G | C |
| TCGA-29-1696 | SH2B1_ENST | ENST00000322610 | p.S430T | c.1289G>C | Unverified | GAG | AGC | AAT | 2 | G | C |
| TCGA-29-1696 | SH2B1_ENST | ENST00000322610 | p.S430T | c.1289G>C | Unverified | GAG | AGC | AAT | 2 | G | C |
| TCGA-29-1696 | SH2B1_ENST | ENST00000359285 | p.S430T | c.1289G>C | Unverified | GAG | AGC | AAT | 2 | G | C |
| TCGA-29-1696 | SH2B1_ENST | ENST00000359285 | p.S430T | c.1289G>C | Unverified | GAG | AGC | AAT | 2 | G | C |
| TCGA-61-1910 | SH3GLB1    | ENST00000212369 | p.V79L  | c.235G>C  | Unverified | TTT | GTT | TAT | 1 | G | C |
| TCGA-61-1910 | SH3GLB1_EI | ENST00000482504 | p.V79L  | c.235G>C  | Unverified | TTT | GTT | TAT | 1 | G | C |
| TCGA-25-1313 | SH3PXD2B   | ENST00000311601 | p.R671T | c.2012G>C | Verified   | CTC | AGG | CCT | 2 | G | C |
| TCGA-13-0886 | SHC2       | XM_375550.2     | p.E771D | c.2313G>C | Unverified | cac | gag | gag | 3 | G | C |
| TCGA-23-1122 | SHCBP1     | ENST00000303383 | p.G653G | c.1959G>C | Verified   | GTT | GGG | ATT | 3 | G | C |
| TCGA-10-0930 | SHKBP1     | ENST00000291842 | p.G344A | c.1031G>C | Verified   | AAC | GGC | TCC | 2 | G | C |
| TCGA-10-0930 | SHKBP1     | ENST00000291842 | p.G344A | c.1031G>C | Verified   | AAC | GGC | TCC | 2 | G | C |
| TCGA-13-1497 | SHROOM2    | ENST00000380913 | p.S983T | c.2948G>C | Verified   | ccg | agt | cag | 2 | G | C |
| TCGA-29-1781 | SHROOM3    | ENST00000296043 | p.R718P | c.2153G>C | Unverified | GAC | CGG | CAG | 2 | G | C |
| TCGA-29-1769 | SIDT1      | ENST00000264852 | p.M578I | c.1734G>C | Unverified | TTC | ATG | TAC | 3 | G | C |
| TCGA-24-1469 | SIM1       | ENST00000262901 | p.E579D | c.1737G>C | Verified   | GAA | GAG | AAC | 3 | G | C |
| TCGA-29-1696 | SIN3B      | ENST00000379803 | p.D769H | c.2305G>C | Unverified | CTG | GAC | GAT | 1 | G | C |
| TCGA-29-1696 | SIN3B      | ENST00000379803 | p.D769H | c.2305G>C | Unverified | CTG | GAC | GAT | 1 | G | C |
| TCGA-24-1849 | SIX4       | ENST00000216513 | p.E232D | c.696G>C  | Unverified | AAG | GAG | AAG | 3 | G | C |
| TCGA-25-2401 | SKIV2L2    | ENST00000230640 | p.V729L | c.2185G>C | Verified   | GTT | GTC | CCA | 1 | G | C |
| TCGA-61-1915 | SLC22A2    | ENST00000366953 | p.G328A | c.983G>C  | Unverified | ACT | GGC | AAG | 2 | G | C |
| TCGA-24-1846 | SLC22A23   | ENST00000380302 | p.S157S | c.471G>C  | Unverified | AAC | TCG | CTG | 3 | G | C |
| TCGA-24-1846 | SLC22A23_E | ENST00000406686 | p.S438S | c.1314G>C | Unverified | AAC | TCG | CTG | 3 | G | C |
| TCGA-23-1021 | SLC22A8    | ENST00000336232 | p.G166A | c.497G>C  | Verified   | TCC | GGT | GCA | 2 | G | C |
| TCGA-13-0903 | SLC23A2    | ENST00000338244 | p.S78T  | c.233G>C  | Verified   | GAT | AGC | ACT | 2 | G | C |
| TCGA-25-1326 | SLC25A44   | ENST00000359511 | p.Q264H | c.792G>C  | Verified   | AGA | CAG | CTG | 3 | G | C |
| TCGA-13-0916 | SLC26A3    | ENST00000340010 | p.E334Q | c.1000G>C | Verified   | GTG | GAG | ACT | 1 | G | C |
| TCGA-13-0916 | SLC26A8    | ENST00000355574 | p.R63P  | c.188G>C  | Verified   | TGC | CGC | TGC | 2 | G | C |
| TCGA-25-2393 | SLC2A12    | ENST00000275230 | p.K327N | c.981G>C  | Verified   | GTC | AAG | GTC | 3 | G | C |
| TCGA-24-2267 | SLC2A4     | ENST00000317370 | p.G207R | c.619G>C  | Unverified | CTG | GGC | CTC | 1 | G | C |
| TCGA-20-1685 | SLC2A9     | ENST00000309065 | p.E162D | c.486G>C  | Unverified | AGT | GAG | ATC | 3 | G | C |
| TCGA-20-1685 | SLC2A9_ENS | ENST00000264784 | p.E191D | c.573G>C  | Unverified | AGT | GAG | ATC | 3 | G | C |
| TCGA-13-1497 | SLC30A8    | ENST00000456015 | p.V330L | c.988G>C  | Verified   | GTG | GTT | CGG | 1 | G | C |

|              |            |                 |          |             |            |     |     |     |   |   |   |
|--------------|------------|-----------------|----------|-------------|------------|-----|-----|-----|---|---|---|
| TCGA-13-0884 | SLC34A2    | ENST00000382051 | p.G257A  | c.770G>C    | Verified   | AAT | GGA | GAA | 2 | G | C |
| TCGA-23-1118 | SLC35D3    | ENST00000331858 | p.G327A  | c.980G>C    | Verified   | AGT | GGA | GAC | 2 | G | C |
| TCGA-04-1649 | SLC36A2    | ENST00000335244 | p.G280R  | c.838G>C    | Unverified | ATT | GGT | GTG | 1 | G | C |
| TCGA-04-1338 | SLC36A3    | ENST00000335230 | p.E422Q  | c.1264G>C   | Verified   | TCT | GAG | GAC | 1 | G | C |
| TCGA-25-2042 | SLC40A1    | ENST00000261024 | p.Q194H  | c.582G>C    | Verified   | GGC | CAG | ATT | 3 | G | C |
| TCGA-29-1775 | SLC44A5    | ENST00000370855 | p.D537H  | c.1609G>C   | Unverified | TTG | GAC | CAC | 1 | G | C |
| TCGA-04-1338 | SLC44A5    | ENST00000370855 | p.?      | c.1266+1G>C | Verified   | CCA | GAG | ATT | 3 | G | C |
| TCGA-29-1775 | SLC44A5_EN | ENST00000370859 | p.D537H  | c.1609G>C   | Unverified | TTG | GAC | CAC | 1 | G | C |
| TCGA-61-2012 | SLC4A7     | ENST00000295736 | p.G811A  | c.2432G>C   | Verified   | TTG | GGG | TCA | 2 | G | C |
| TCGA-13-0923 | SLC5A6     | ENST00000310574 | p.R394P  | c.1181G>C   | Verified   | GCC | CGG | GCC | 2 | G | C |
| TCGA-24-1435 | SLC6A6     | ENST00000360861 | p.E569Q  | c.1705G>C   | Verified   | ACT | GAG | GGG | 1 | G | C |
| TCGA-29-1777 | SLC7A13    | ENST00000297524 | p.S172T  | c.515G>C    | Unverified | CTT | AGC | TTC | 2 | G | C |
| TCGA-09-2050 | SLC7A4     | ENST00000382932 | p.A373A  | c.1119G>C   | Verified   | CTG | GCG | TTC | 3 | G | C |
| TCGA-30-1718 | SLC8A3     | ENST00000381269 | p.R483T  | c.1448G>C   | Unverified | GTA | AGG | TTG | 2 | G | C |
| TCGA-30-1718 | SLC8A3_ENS | ENST00000357887 | p.R483T  | c.1448G>C   | Unverified | GTA | AGG | TTG | 2 | G | C |
| TCGA-23-1022 | SLC9A11    | ENST00000367714 | p.M563I  | c.1689G>C   | Verified   | TAT | ATG | AGA | 3 | G | C |
| TCGA-04-1342 | SLCO4A1    | ENST00000370507 | p.R448S  | c.1344G>C   | Unverified | CTC | AGG | CTC | 3 | G | C |
| TCGA-24-1846 | SLIT2      | ENST00000504154 | p.Q1042H | c.3126G>C   | Unverified | GCC | CAG | GAC | 3 | G | C |
| TCGA-24-1843 | SLITRK5    | ENST00000325089 | p.P943P  | c.2829G>C   | Unverified | GAG | CCG | GAC | 3 | G | C |
| TCGA-30-1718 | SLX4       | ENST00000294008 | p.Q1216H | c.3648G>C   | Unverified | CAG | CAG | GAG | 3 | G | C |
| TCGA-13-0714 | SMAD1      | ENST00000302085 | p.W420C  | c.1260G>C   | Verified   | ggc | tgg | gga | 3 | G | C |
| TCGA-23-1114 | SMARCA1    | NM_003069.2     | p.W860C  | c.2580G>C   | Unverified | aac | tgg | act | 3 | G | C |
| TCGA-29-1761 | SMC1A      | ENST00000322213 | p.Q702H  | c.2106G>C   | Unverified | gtg | cag | tct | 3 | G | C |
| TCGA-13-0793 | SMC1B      | NM_148674.1     | p.E283Q  | c.847G>C    | Unverified | aaa | gaa | tta | 1 | G | C |
| TCGA-29-1703 | SMG1       | SU_SMG1         | p.R888T  | c.2663G>C   | Unverified | cag | aga | ctg | 2 | G | C |
| TCGA-29-1703 | SMG1_ENST  | ENST00000446231 | p.R892T  | c.2675G>C   | Unverified | CAG | AGA | CTG | 2 | G | C |
| TCGA-24-2262 | SMR3A      | ENST00000226460 | p.A15A   | c.45G>C     | Unverified | GCA | GCG | TGT | 3 | G | C |
| TCGA-29-1761 | SMR3B      | ENST00000304915 | p.E21D   | c.63G>C     | Unverified | GGT | GAG | AGT | 3 | G | C |
| TCGA-13-1510 | SNAI1      | ENST00000244050 | p.E48D   | c.144G>C    | Unverified | ccg | gag | atc | 3 | G | C |
| TCGA-13-0793 | SND1       | ENST00000354725 | p.T794T  | c.2382G>C   | Verified   | GCC | ACG | GAG | 3 | G | C |
| TCGA-13-0919 | SNRNP200   | ENST00000323853 | p.G1353R | c.4057G>C   | Unverified | ACG | GGC | AGC | 1 | G | C |
| TCGA-13-0761 | SNX16      | ENST00000396330 | p.A197P  | c.589G>C    | Verified   | GTA | GCT | CAC | 1 | G | C |
| TCGA-13-0761 | SNX16      | ENST00000396330 | p.A197P  | c.589G>C    | Verified   | GTA | GCT | CAC | 1 | G | C |
| TCGA-24-1423 | SOAT2      | ENST00000301466 | p.D154H  | c.460G>C    | Verified   | TTT | GAC | CTA | 1 | G | C |



|              |            |                     |          |           |            |     |     |     |   |   |   |
|--------------|------------|---------------------|----------|-----------|------------|-----|-----|-----|---|---|---|
| TCGA-29-1705 | SOGA1      | ENST00000237536     | p.G966A  | c.2897G>C | Unverified | ACG | GGG | GAC | 2 | G | C |
| TCGA-29-1705 | SOGA1_ENS  | ENST00000237536_v68 | p.G966A  | c.2897G>C | Unverified | ACG | GGG | GAC | 2 | G | C |
| TCGA-24-1469 | SOS2       | ENST00000216373     | p.E647Q  | c.1939G>C | Verified   | TTT | GAA | ATT | 1 | G | C |
| TCGA-61-2095 | SOX7       | ENST00000304501     | p.G151R  | c.451G>C  | Unverified | AGC | GGC | AGC | 1 | G | C |
| TCGA-61-1725 | SP100      | ENST00000264052     | p.E206D  | c.618G>C  | Unverified | TCA | GAG | CAC | 3 | G | C |
| TCGA-61-2102 | SP100_ENST | ENST00000340126     | p.V786L  | c.2356G>C | Verified   | AAG | GTC | TAC | 1 | G | C |
| TCGA-61-1725 | SP100_ENST | ENST00000340126     | p.E206D  | c.618G>C  | Unverified | TCA | GAG | CAC | 3 | G | C |
| TCGA-25-2401 | SP140_ENST | ENST00000392045     | p.P739P  | c.2217G>C | Verified   | TCT | CCG | GGA | 3 | G | C |
| TCGA-29-1784 | SPATA7     | ENST00000393545     | p.V538V  | c.1614G>C | Unverified | TCT | GTG | AAT | 3 | G | C |
| TCGA-24-1423 | SPDYE1     | ENST00000258704     | p.G234G  | c.702G>C  | Verified   | TAT | GGG | AAG | 3 | G | C |
| TCGA-61-1998 | SPECC1L    | ENST00000314328     | p.E563Q  | c.1687G>C | Verified   | TTA | GAG | GAA | 1 | G | C |
| TCGA-61-1737 | SPEG       | SU_SPEG             | p.G2851R | c.8551G>C | Unverified | agg | ggc | ctg | 1 | G | C |
| TCGA-09-2051 | SPEN       | ENST00000375759     | p.G2788R | c.8362G>C | Unverified | cca | ggg | tcc | 1 | G | C |
| TCGA-24-1469 | SPEN       | ENST00000375759     | p.R251T  | c.752G>C  | Verified   | tct | aga | aat | 2 | G | C |
| TCGA-61-1904 | SPEN       | ENST00000375759     | p.G2813G | c.8439G>C | Unverified | gaa | ggg | gtt | 3 | G | C |
| TCGA-24-2288 | SPHKAP     | XM_051221.5         | p.E1671Q | c.5011G>C | Unverified | att | gaa | aag | 1 | G | C |
| TCGA-13-0760 | SPINK5     | ENST00000256084     | p.V1013L | c.3037G>C | Verified   | CCT | GTC | TGT | 1 | G | C |
| TCGA-04-1347 | SPINT1     | ENST00000344051     | p.Q221H  | c.663G>C  | Verified   | TTC | CAG | CTG | 3 | G | C |
| TCGA-13-0923 | SPOCD1     | ENST00000360482     | p.D443H  | c.1327G>C | Verified   | TCA | GAC | AAC | 1 | G | C |
| TCGA-04-1356 | SPTA1      | ENST00000368148     | p.V164L  | c.490G>C  | Verified   | TAT | GTA | CAG | 1 | G | C |
| TCGA-20-1683 | SPTA1      | ENST00000368148     | p.W246S  | c.737G>C  | Unverified | GCC | TGG | GAG | 2 | G | C |
| TCGA-29-1763 | SPTA1      | ENST00000368148     | p.R1608P | c.4823G>C | Unverified | AGT | CGT | CAA | 2 | G | C |
| TCGA-29-1703 | SPTA1      | ENST00000368148     | p.W1097C | c.3291G>C | Unverified | GAA | TGG | ATT | 3 | G | C |
| TCGA-20-0991 | SPTBN5     | ENST00000320955     | p.A331P  | c.991G>C  | Unverified | GAG | GCG | CGG | 1 | G | C |
| TCGA-24-2035 | SRPK2      | ENST00000357311     | p.Q315H  | c.945G>C  | Verified   | gac | cag | gat | 3 | G | C |
| TCGA-61-2109 | SRSF11     | ENST00000370950     | p.R343T  | c.1028G>C | Unverified | GAG | AGA | CGA | 2 | G | C |
| TCGA-29-1777 | SRSF11_ENS | ENST00000370950     | p.R363T  | c.1088G>C | Unverified | AAA | AGA | AAA | 2 | G | C |
| TCGA-24-2024 | ST8SIA1    | ENST00000396037     | p.K22N   | c.66G>C   | Verified   | TGG | AAG | TTC | 3 | G | C |
| TCGA-24-1469 | STAG1      | ENST00000383202     | p.V1075L | c.3223G>C | Verified   | TCA | GTA | AGG | 1 | G | C |
| TCGA-13-0884 | STAT1      | ENST00000361099     | p.V734L  | c.2200G>C | Verified   | gag | gtg | tct | 1 | G | C |
| TCGA-13-1498 | STAU1      | ENST00000371856     | p.E310Q  | c.928G>C  | Verified   | aca | gag | cga | 1 | G | C |
| TCGA-29-1763 | STK36      | ENST00000295709     | p.E894D  | c.2682G>C | Unverified | GAG | GAG | GCA | 3 | G | C |
| TCGA-10-0930 | STK38L     | ENST00000389032     | p.V104L  | c.310G>C  | Verified   | GAG | GTG | CGG | 1 | G | C |
| TCGA-10-0930 | STK38L     | ENST00000389032     | p.V104L  | c.310G>C  | Verified   | GAG | GTG | CGG | 1 | G | C |

|              |            |                 |          |            |            |     |     |     |   |   |   |
|--------------|------------|-----------------|----------|------------|------------|-----|-----|-----|---|---|---|
| TCGA-61-1998 | STOML1     | ENST00000316900 | p.D358H  | c.1072G>C  | Unverified | GCA | GAC | CTG | 1 | G | C |
| TCGA-61-1907 | STT3B      | ENST00000295770 | p.D782H  | c.2344G>C  | Unverified | TTA | GAT | CAC | 1 | G | C |
| TCGA-13-0887 | STXBP3     | ENST00000370008 | p.L252L  | c.756G>C   | Verified   | GAA | CTG | ACC | 3 | G | C |
| TCGA-61-1737 | SUFU       | ENST00000369902 | p.R339P  | c.1016G>C  | Unverified | GAC | CGG | GCC | 2 | G | C |
| TCGA-04-1343 | SUPT5H     | ENST00000359191 | p.E362Q  | c.1084G>C  | Verified   | TTT | GAG | GGG | 1 | G | C |
| TCGA-61-1740 | SUPT6H     | ENST00000314616 | p.C527S  | c.1580G>C  | Unverified | ATC | TGC | CAG | 2 | G | C |
| TCGA-29-1784 | SUSD1      | ENST00000374270 | p.Q582H  | c.1746G>C  | Unverified | ACC | CAG | ATA | 3 | G | C |
| TCGA-24-1469 | SV2B       | ENST00000394232 | p.L142L  | c.426G>C   | Unverified | TGT | CTG | TCC | 3 | G | C |
| TCGA-29-1696 | SV2B       | ENST00000394232 | p.G601G  | c.1803G>C  | Unverified | TGT | GGG | ACA | 3 | G | C |
| TCGA-29-1696 | SV2B       | ENST00000394232 | p.G601G  | c.1803G>C  | Unverified | TGT | GGG | ACA | 3 | G | C |
| TCGA-24-1469 | SYCP2L     | ENST00000283141 | p.D141H  | c.421G>C   | Verified   | GAA | GAT | TTC | 1 | G | C |
| TCGA-29-1761 | SYNE1      | ENST00000265368 | p.E6380Q | c.19138G>C | Unverified | TTG | GAG | CAG | 1 | G | C |
| TCGA-29-1761 | SYNE1_ENST | ENST00000265368 | p.E6380Q | c.19138G>C | Unverified | TTG | GAG | CAG | 1 | G | C |
| TCGA-29-1761 | SYNE1_ENST | ENST00000423061 | p.E6309Q | c.18925G>C | Unverified | TTG | GAG | CAG | 1 | G | C |
| TCGA-25-1326 | SYNE2      | ENST00000358025 | p.E3636Q | c.10906G>C | Verified   | TTT | GAG | AAT | 1 | G | C |
| TCGA-29-1690 | SYNE2      | ENST00000358025 | p.G6423A | c.19268G>C | Unverified | ACA | GGC | GAC | 2 | G | C |
| TCGA-25-2042 | SYNM       | ENST00000328642 | p.E1117Q | c.3349G>C  | Verified   | CTG | GAG | GAT | 1 | G | C |
| TCGA-61-1998 | SYP        | ENST00000263233 | p.Q185H  | c.555G>C   | Verified   | CGC | CAG | ACA | 3 | G | C |
| TCGA-61-1998 | SYP_ENST00 | ENST00000263233 | p.Q185H  | c.555G>C   | Verified   | CGC | CAG | ACA | 3 | G | C |
| TCGA-61-1998 | SYT7       | ENST00000263846 | p.R291R  | c.873G>C   | Verified   | GCC | CGG | AAC | 3 | G | C |
| TCGA-13-1501 | SYTL3      | ENST00000360448 | p.K61N   | c.183G>C   | Unverified | GAG | AAG | TGC | 3 | G | C |
| TCGA-13-1501 | SYTL3      | ENST00000360448 | p.K61N   | c.183G>C   | Unverified | GAG | AAG | TGC | 3 | G | C |
| TCGA-13-0920 | SYTL4      | ENST00000372989 | p.E367D  | c.1101G>C  | Verified   | TAT | GAG | CAG | 3 | G | C |
| TCGA-24-1423 | TACR2      | ENST00000373306 | p.G2A    | c.5G>C     | Unverified | ATG | GGG | ACC | 2 | G | C |
| TCGA-24-2024 | TACR3      | ENST00000304883 | p.K368N  | c.1104G>C  | Verified   | TTC | AAG | AGA | 3 | G | C |
| TCGA-20-1683 | TAGAP      | ENST00000367066 | p.V156L  | c.466G>C   | Unverified | GCT | GTG | GTC | 1 | G | C |
| TCGA-25-2392 | TANC1      | ENST00000263635 | p.S1564T | c.4691G>C  | Unverified | CCA | AGT | CCC | 2 | G | C |
| TCGA-24-1563 | TAS1R1     | ENST00000333172 | p.M166I  | c.498G>C   | Verified   | CCC | ATG | ATT | 3 | G | C |
| TCGA-25-2042 | TBC1D10C   | ENST00000312390 | p.G136A  | c.407G>C   | Unverified | ATT | GGC | AGG | 2 | G | C |
| TCGA-13-0760 | TBC1D14    | ENST00000340816 | p.?      | c.799-1G>C | Verified   | AAG | GAA | TAT | 1 | G | C |
| TCGA-04-1530 | TBC1D21    | ENST00000300504 | p.A222P  | c.664G>C   | Verified   | TTT | GCT | GAG | 1 | G | C |
| TCGA-29-1777 | TBC1D4     | ENST00000377636 | p.E814Q  | c.2440G>C  | Unverified | GAG | GAG | GAA | 1 | G | C |
| TCGA-13-0890 | TBC1D5     | ENST00000253692 | p.S477T  | c.1430G>C  | Verified   | GGC | AGT | GCA | 2 | G | C |
| TCGA-24-1423 | TBC1D8B    | ENST00000357242 | p.A965P  | c.2893G>C  | Verified   | caa | gca | tat | 1 | G | C |

|              |          |                 |          |           |            |     |     |     |   |   |   |
|--------------|----------|-----------------|----------|-----------|------------|-----|-----|-----|---|---|---|
| TCGA-24-1422 | TBCK     | ENST00000273980 | p.S609T  | c.1826G>C | Verified   | CTG | AGT | AAT | 2 | G | C |
| TCGA-04-1542 | TCERG1L  | ENST00000368643 | p.R368T  | c.1103G>C | Verified   | AAC | AGG | GAA | 2 | G | C |
| TCGA-23-1809 | TDRD1    | ENST00000251864 | p.A859P  | c.2575G>C | Unverified | CAA | GCC | AGA | 1 | G | C |
| TCGA-24-2280 | TECTA    | ENST00000392793 | p.R1827T | c.5480G>C | Unverified | GAG | AGG | GAG | 2 | G | C |
| TCGA-13-1498 | TEDDM1   | ENST00000367565 | p.K89N   | c.267G>C  | Verified   | AGC | AAG | AAT | 3 | G | C |
| TCGA-29-1761 | TEF      | ENST00000266304 | p.A266P  | c.796G>C  | Unverified | GCA | GCC | TTC | 1 | G | C |
| TCGA-25-2392 | TEP1     | ENST00000262715 | p.E1811Q | c.5431G>C | Verified   | CCA | GAG | GGG | 1 | G | C |
| TCGA-24-2035 | TFAP2D   | ENST00000008391 | p.L292F  | c.876G>C  | Verified   | TCC | TTG | GTT | 3 | G | C |
| TCGA-24-0975 | TFDP3    | NM_016521.2     | p.A83P   | c.247G>C  | Verified   | aga | gct | gcc | 1 | G | C |
| TCGA-23-1110 | TFEB     | ENST00000230323 | p.A214A  | c.642G>C  | Verified   | cct | gcg | gac | 3 | G | C |
| TCGA-09-1665 | TG       | ENST00000220616 | p.C1543S | c.4628G>C | Verified   | TTC | TGT | GTG | 2 | G | C |
| TCGA-61-1740 | TGFBR1   | ENST00000374994 | p.G217A  | c.650G>C  | Unverified | ttt | gga | gaa | 2 | G | C |
| TCGA-10-0930 | TGFBR3   | ENST00000212355 | p.S767T  | c.2300G>C | Verified   | CCA | AGC | ATG | 2 | G | C |
| TCGA-10-0930 | TGFBR3   | ENST00000212355 | p.S767T  | c.2300G>C | Verified   | CCA | AGC | ATG | 2 | G | C |
| TCGA-61-1904 | TGM7     | ENST00000452443 | p.G586A  | c.1757G>C | Unverified | TCT | GGC | ATC | 2 | G | C |
| TCGA-29-1763 | THAP11   | ENST00000303596 | p.Q124H  | c.372G>C  | Unverified | CAG | CAG | CAG | 3 | G | C |
| TCGA-13-1496 | THBS2    | ENST00000366787 | p.R189P  | c.566G>C  | Verified   | AGC | CGG | ATG | 2 | G | C |
| TCGA-13-0900 | THBS3    | ENST00000368378 | p.E210D  | c.630G>C  | Verified   | GAC | GAG | TCC | 3 | G | C |
| TCGA-29-1784 | THOC5    | ENST00000397871 | p.Q253H  | c.759G>C  | Unverified | GAC | CAG | GCT | 3 | G | C |
| TCGA-13-0762 | THOC6    | ENST00000326266 | p.A200P  | c.598G>C  | Verified   | ACA | GCC | AAG | 1 | G | C |
| TCGA-13-0762 | THOC6    | ENST00000326266 | p.A200P  | c.598G>C  | Verified   | ACA | GCC | AAG | 1 | G | C |
| TCGA-24-0975 | THSD7A   | ENST00000423059 | p.S1526S | c.4578G>C | Verified   | CAC | TCG | TAC | 3 | G | C |
| TCGA-13-0893 | TIMELESS | ENST00000553532 | p.A119P  | c.355G>C  | Verified   | CAG | GCC | TAC | 1 | G | C |
| TCGA-24-1616 | TIMM17B  | ENST00000376582 | p.G120R  | c.358G>C  | Verified   | ggg | ggc | atc | 1 | G | C |
| TCGA-23-1809 | TIMM9    | ENST00000395159 | p.R66T   | c.197G>C  | Unverified | ATG | AGA | TTT | 2 | G | C |
| TCGA-25-1313 | TKTL1    | ENST00000369915 | p.G377A  | c.1130G>C | Verified   | ATA | GGA | GGC | 2 | G | C |
| TCGA-29-1701 | TLL1     | ENST00000061240 | p.R218P  | c.653G>C  | Unverified | GGT | CGG | CGA | 2 | G | C |
| TCGA-61-1915 | TLR4     | ENST00000355622 | p.L785L  | c.2355G>C | Unverified | GAG | CTG | TAC | 3 | G | C |
| TCGA-25-2401 | TLR6     | ENST00000381950 | p.R446T  | c.1337G>C | Verified   | TTC | AGA | TGT | 2 | G | C |
| TCGA-29-1761 | TM4SF1   | ENST00000305366 | p.C21S   | c.62G>C   | Unverified | CTG | TGC | ATC | 2 | G | C |
| TCGA-23-1124 | TM7SF2   | ENST00000279263 | p.G200R  | c.598G>C  | Verified   | ATC | GGC | TGG | 1 | G | C |
| TCGA-61-2094 | TM7SF4   | ENST00000297581 | p.D255H  | c.763G>C  | Unverified | TTT | GAT | GAA | 1 | G | C |
| TCGA-29-1691 | TMC2     | ENST00000358864 | p.E151Q  | c.451G>C  | Unverified | GAG | GAG | GAA | 1 | G | C |
| TCGA-61-1725 | TMCC1    | ENST00000393238 | p.L601F  | c.1803G>C | Unverified | CTT | TTG | GTC | 3 | G | C |

|              |            |                 |          |            |            |     |     |     |   |   |   |
|--------------|------------|-----------------|----------|------------|------------|-----|-----|-----|---|---|---|
| TCGA-61-1725 | TMCC1_ENS  | ENST00000393238 | p.L601F  | c.1803G>C  | Unverified | CTT | TTG | GTC | 3 | G | C |
| TCGA-13-1488 | TMEM116    | ENST00000354825 | p.R140P  | c.419G>C   | Verified   | GTG | CGC | TTC | 2 | G | C |
| TCGA-61-1740 | TMEM127    | ENST00000258439 | p.E213Q  | c.637G>C   | Unverified | TCA | GAG | ATG | 1 | G | C |
| TCGA-24-2280 | TMEM211    | ENST00000382744 | p.G5A    | c.14G>C    | Unverified | GGA | GGC | TGG | 2 | G | C |
| TCGA-24-2288 | TMEM39B    | ENST00000373634 | p.G228R  | c.682G>C   | Unverified | CTG | GGC | TGT | 1 | G | C |
| TCGA-24-1104 | TMEM71     | ENST00000356838 | p.S96T   | c.287G>C   | Verified   | ACC | AGC | GTT | 2 | G | C |
| TCGA-29-1764 | TMEM74     | ENST00000297459 | p.W141C  | c.423G>C   | Unverified | ggc | tgg | gaa | 3 | G | C |
| TCGA-36-1577 | TMOD2      | ENST00000249700 | p.E33Q   | c.97G>C    | Verified   | TTG | GAA | AAT | 1 | G | C |
| TCGA-30-1855 | TMTC4      | ENST00000342624 | p.S676S  | c.2028G>C  | Unverified | TTC | TCG | TTG | 3 | G | C |
| TCGA-04-1342 | TNFSF13B   | ENST00000375887 | p.A88P   | c.262G>C   | Unverified | cac | gcg | gag | 1 | G | C |
| TCGA-13-0900 | TNIK       | ENST00000436636 | p.R43P   | c.128G>C   | Verified   | GGT | CGT | CAT | 2 | G | C |
| TCGA-13-1499 | TNKS2      | ENST00000371627 | p.D668H  | c.2002G>C  | Verified   | CCT | GAT | AAT | 1 | G | C |
| TCGA-13-1512 | TNN        | ENST00000239462 | p.Q269H  | c.807G>C   | Verified   | CTG | CAG | CTG | 3 | G | C |
| TCGA-13-0923 | TNNT1      | ENST00000291901 | p.D196H  | c.586G>C   | Verified   | ATT | GAC | TAC | 1 | G | C |
| TCGA-61-1914 | TNR        | ENST00000367674 | p.Q1354H | c.4062G>C  | Unverified | CGG | CAG | TCC | 3 | G | C |
| TCGA-13-1498 | TOB2       | ENST00000327492 | p.L150L  | c.450G>C   | Verified   | TCC | CTG | TCC | 3 | G | C |
| TCGA-13-0919 | TOPBP1     | NM_007027.2     | p.E636Q  | c.1906G>C  | Verified   | ttg | gag | act | 1 | G | C |
| TCGA-13-0807 | TP53       | ENST00000269305 | p.A276P  | c.826G>C   | Verified   | TGT | GCC | TGT | 1 | G | C |
| TCGA-13-0905 | TP53       | ENST00000269305 | p.R273P  | c.818G>C   | Verified   | GTG | CGT | GTT | 2 | G | C |
| TCGA-23-1124 | TP53       | ENST00000269305 | p.R156P  | c.467G>C   | Verified   | ACC | CGC | GTC | 2 | G | C |
| TCGA-10-0930 | TP53       | ENST00000269305 | p.?      | c.375+5G>C | Verified   | TGC | ACG | TAC | 3 | G | C |
| TCGA-10-0930 | TP53       | ENST00000269305 | p.?      | c.375+5G>C | Verified   | TGC | ACG | TAC | 3 | G | C |
| TCGA-10-0930 | TP53_ENSTC | ENST00000269305 | p.?      | c.375+5G>C | Verified   | TGC | ACG | TAC | 3 | G | C |
| TCGA-10-0930 | TP53_ENSTC | ENST00000269305 | p.?      | c.375+5G>C | Verified   | TGC | ACG | TAC | 3 | G | C |
| TCGA-10-0930 | TP53_ENSTC | ENST00000413465 | p.?      | c.375+5G>C | Verified   | TGC | ACG | TAC | 3 | G | C |
| TCGA-10-0930 | TP53_ENSTC | ENST00000413465 | p.?      | c.375+5G>C | Verified   | TGC | ACG | TAC | 3 | G | C |
| TCGA-24-1422 | TPBG       | ENST00000369750 | p.P115P  | c.345G>C   | Unverified | CGG | CCG | CCG | 3 | G | C |
| TCGA-61-2102 | TPM2       | ENST00000360958 | p.V64L   | c.190G>C   | Verified   | TCC | GTG | AAG | 1 | G | C |
| TCGA-13-1507 | TPP2       | ENST00000376065 | p.S328T  | c.983G>C   | Verified   | TAC | AGT | TAC | 2 | G | C |
| TCGA-09-0369 | TRA2A      | ENST00000297071 | p.G35R   | c.103G>C   | Verified   | TCA | GGA | TCT | 1 | G | C |
| TCGA-09-0369 | TRA2A      | ENST00000297071 | p.G35R   | c.103G>C   | Verified   | TCA | GGA | TCT | 1 | G | C |
| TCGA-29-1775 | TRAM2      | ENST00000182527 | p.E186Q  | c.556G>C   | Unverified | AAG | GAG | GAA | 1 | G | C |
| TCGA-29-1761 | TRANK1     | ENST00000428977 | p.R1707P | c.5120G>C  | Unverified | TTC | CGG | TTC | 2 | G | C |
| TCGA-29-1761 | TRANK1_EN  | ENST00000429976 | p.R2257P | c.6770G>C  | Unverified | TTC | CGG | TTC | 2 | G | C |

|              |            |                     |           |            |            |     |     |     |   |   |   |
|--------------|------------|---------------------|-----------|------------|------------|-----|-----|-----|---|---|---|
| TCGA-09-1674 | TRIM2      | ENST00000437508     | p.K31N    | c.93G>C    | Unverified | tac | aag | aat | 3 | G | C |
| TCGA-09-1674 | TRIM2_ENS  | ENST00000338700     | p.K58N    | c.174G>C   | Unverified | TAC | AAG | AAT | 3 | G | C |
| TCGA-04-1338 | TRIM21     | ENST00000254436     | p.V250L   | c.748G>C   | Verified   | att | gtc | ctg | 1 | G | C |
| TCGA-13-0893 | TRIM21     | ENST00000254436     | p.E192Q   | c.574G>C   | Verified   | gaa | gaa | gaa | 1 | G | C |
| TCGA-09-2050 | TRIM34     | ENST00000514226     | p.G60R    | c.178G>C   | Verified   | tgt | ggt | atc | 1 | G | C |
| TCGA-04-1362 | TRIM39     | ENST00000376656     | p.V351L   | c.1051G>C  | Verified   | CTA | GTC | CTG | 1 | G | C |
| TCGA-24-1417 | TRIM43     | ENST00000272395     | p.E207D   | c.621G>C   | Verified   | CAA | GAG | ATT | 3 | G | C |
| TCGA-29-1784 | TRIM44     | ENST00000299413     | p.E172D   | c.516G>C   | Unverified | gca | gag | aga | 3 | G | C |
| TCGA-24-1422 | TRIM50     | ENST00000333149     | p.K390N   | c.1170G>C  | Unverified | CTG | AAG | GAG | 3 | G | C |
| TCGA-29-1777 | TRIM56     | ENST00000306085     | p.S567T   | c.1700G>C  | Unverified | GCT | AGC | GCA | 2 | G | C |
| TCGA-29-1777 | TRIM56_EN! | ENST00000306085     | p.S567T   | c.1700G>C  | Unverified | GCT | AGC | GCA | 2 | G | C |
| TCGA-09-2050 | TRIM6-TRIM | ENST00000337072     | p.G414R   | c.1240G>C  | Verified   | TGT | GGT | ATC | 1 | G | C |
| TCGA-24-1463 | TRIM8      | ENST00000302424     | p.W524S   | c.1571G>C  | Verified   | GAC | TGG | CTT | 2 | G | C |
| TCGA-61-1914 | TRIO       | ENST00000344204     | p.Q1066H  | c.3198G>C  | Unverified | gag | cag | aag | 3 | G | C |
| TCGA-09-2051 | TRIOBP     | ENST00000407319     | p.V137L   | c.409G>C   | Unverified | GCG | GTG | CAG | 1 | G | C |
| TCGA-09-2051 | TRIOBP_ENS | ENST00000406386     | p.V1850L  | c.5548G>C  | Unverified | GCG | GTG | CAG | 1 | G | C |
| TCGA-61-1904 | TRIOBP_ENS | ENST00000406386     | p.C26S    | c.77G>C    | Unverified | AAC | TGC | TTC | 2 | G | C |
| TCGA-30-1855 | TRPM7      | ENST00000313478     | p.V136L   | c.406G>C   | Unverified | CTT | GTT | ATC | 1 | G | C |
| TCGA-24-1103 | TRRAP      | ENST00000355540     | p.E3420Q  | c.10258G>C | Verified   | TTG | GAG | GCC | 1 | G | C |
| TCGA-23-2077 | TSEN54     | ENST00000333213     | p.D451H   | c.1351G>C  | Verified   | TTT | GAT | GTT | 1 | G | C |
| TCGA-29-1693 | TSEN54     | ENST00000333213     | p.S204T   | c.611G>C   | Unverified | AGC | AGC | TCC | 2 | G | C |
| TCGA-61-1740 | TSPAN5     | ENST00000305798     | p.G155G   | c.465G>C   | Unverified | TGT | GGG | GCT | 3 | G | C |
| TCGA-13-0890 | TSR1       | ENST00000301364     | p.K384N   | c.1152G>C  | Verified   | TTG | AAG | GAA | 3 | G | C |
| TCGA-24-1845 | TTC13      | ENST00000366661     | p.C856S   | c.2567G>C  | Unverified | CGT | TGT | CTT | 2 | G | C |
| TCGA-24-1616 | TTC37      | ENST00000358746     | p.D686H   | c.2056G>C  | Verified   | GTT | GAT | TAT | 1 | G | C |
| TCGA-24-2289 | TTC39B     | NM_152574.1         | p.A47A    | c.141G>C   | Unverified | cag | gcg | ccc | 3 | G | C |
| TCGA-23-1029 | TTC39C     | ENST00000304621     | p.V335L   | c.1003G>C  | Unverified | GCA | GTT | TGT | 1 | G | C |
| TCGA-23-1029 | TTC39C_ENS | ENST00000317571_v68 | p.V396L   | c.1186G>C  | Unverified | GCA | GTT | TGT | 1 | G | C |
| TCGA-09-1665 | TTI1       | ENST00000373448     | p.L205F   | c.615G>C   | Verified   | GAT | TTG | TTT | 3 | G | C |
| TCGA-13-0923 | TTLL9      | ENST00000375938     | p.R157P   | c.470G>C   | Verified   | TTT | CGC | AAA | 2 | G | C |
| TCGA-29-1785 | TTN        | NM_003319           | p.D25277H | c.75829G>C | Unverified | gaa | gac | agc | 1 | G | C |
| TCGA-29-1785 | TTN        | NM_003319           | p.D25277H | c.75829G>C | Unverified | gaa | gac | agc | 1 | G | C |
| TCGA-24-1423 | TTN        | NM_003319           | p.R11749T | c.35246G>C | Verified   | aca | aga | tca | 2 | G | C |
| TCGA-30-1718 | TTN        | NM_003319           | p.C5671S  | c.17012G>C | Unverified | aac | tgt | cgc | 2 | G | C |

|              |            |                 |           |            |            |     |     |     |   |   |   |
|--------------|------------|-----------------|-----------|------------|------------|-----|-----|-----|---|---|---|
| TCGA-23-1111 | TTN        | NM_003319       | p.K4571N  | c.13713G>C | Unverified | gcc | aag | cca | 3 | G | C |
| TCGA-29-1785 | TTN_ENST0C | ENST00000342175 | p.D25469H | c.76405G>C | Unverified | GAA | GAC | AGC | 1 | G | C |
| TCGA-29-1785 | TTN_ENST0C | ENST00000342175 | p.D25469H | c.76405G>C | Unverified | GAA | GAC | AGC | 1 | G | C |
| TCGA-30-1718 | TTN_ENST0C | ENST00000342175 | p.C5863S  | c.17588G>C | Unverified | AAC | TGT | CGC | 2 | G | C |
| TCGA-23-1111 | TTN_ENST0C | ENST00000342175 | p.K4763N  | c.14289G>C | Unverified | GCC | AAG | CCA | 3 | G | C |
| TCGA-29-1785 | TTN_ENST0C | ENST00000342992 | p.D31774H | c.95320G>C | Unverified | GAA | GAC | AGC | 1 | G | C |
| TCGA-29-1785 | TTN_ENST0C | ENST00000342992 | p.D31774H | c.95320G>C | Unverified | GAA | GAC | AGC | 1 | G | C |
| TCGA-30-1718 | TTN_ENST0C | ENST00000342992 | p.C12168S | c.36503G>C | Unverified | AAC | TGT | CGC | 2 | G | C |
| TCGA-23-1111 | TTN_ENST0C | ENST00000342992 | p.K11068N | c.33204G>C | Unverified | GCC | AAG | CCA | 3 | G | C |
| TCGA-13-1408 | TTN_ENST0C | ENST00000356127 | p.D7159H  | c.21475G>C | Verified   | GAT | GAT | GCT | 1 | G | C |
| TCGA-29-1785 | TTN_ENST0C | ENST00000356127 | p.D31772H | c.95314G>C | Unverified | GAA | GAC | AGC | 1 | G | C |
| TCGA-29-1785 | TTN_ENST0C | ENST00000356127 | p.D31772H | c.95314G>C | Unverified | GAA | GAC | AGC | 1 | G | C |
| TCGA-24-1423 | TTN_ENST0C | ENST00000356127 | p.R18244T | c.54731G>C | Verified   | ACA | AGA | TCA | 2 | G | C |
| TCGA-30-1718 | TTN_ENST0C | ENST00000356127 | p.C12168S | c.36503G>C | Unverified | AAC | TGT | CGC | 2 | G | C |
| TCGA-13-0887 | TTN_ENST0C | ENST00000356127 | p.Q7912H  | c.23736G>C | Verified   | TCT | CAG | AGG | 3 | G | C |
| TCGA-23-1111 | TTN_ENST0C | ENST00000356127 | p.K11068N | c.33204G>C | Unverified | GCC | AAG | CCA | 3 | G | C |
| TCGA-29-1785 | TTN_ENST0C | ENST00000359218 | p.D25402H | c.76204G>C | Unverified | GAA | GAC | AGC | 1 | G | C |
| TCGA-29-1785 | TTN_ENST0C | ENST00000359218 | p.D25402H | c.76204G>C | Unverified | GAA | GAC | AGC | 1 | G | C |
| TCGA-30-1718 | TTN_ENST0C | ENST00000359218 | p.C5796S  | c.17387G>C | Unverified | AAC | TGT | CGC | 2 | G | C |
| TCGA-23-1111 | TTN_ENST0C | ENST00000359218 | p.K4696N  | c.14088G>C | Unverified | GCC | AAG | CCA | 3 | G | C |
| TCGA-13-0887 | TUBA4A     | ENST00000248437 | p.D218H   | c.652G>C   | Verified   | CTA | GAC | ATC | 1 | G | C |
| TCGA-13-0887 | TUBA4A_EN  | ENST00000392088 | p.D203H   | c.607G>C   | Verified   | CTA | GAC | ATC | 1 | G | C |
| TCGA-23-1032 | TUBG2      | ENST00000251412 | p.S259S   | c.777G>C   | Verified   | GCC | TCG | CTC | 3 | G | C |
| TCGA-13-0905 | TULP1      | ENST00000229771 | p.G414R   | c.1240G>C  | Verified   | CTG | GGC | TTC | 1 | G | C |
| TCGA-23-1123 | TULP1      | ENST00000229771 | p.E204Q   | c.610G>C   | Verified   | GGG | GAG | GCC | 1 | G | C |
| TCGA-23-1123 | TULP1      | ENST00000229771 | p.E204Q   | c.610G>C   | Verified   | GGG | GAG | GCC | 1 | G | C |
| TCGA-24-1846 | TXNDC12    | ENST00000371626 | p.V59L    | c.175G>C   | Unverified | ATG | GTG | ATT | 1 | G | C |
| TCGA-61-1907 | TYK2       | ENST00000525621 | p.E636D   | c.1908G>C  | Unverified | CAG | GAG | CTA | 3 | G | C |
| TCGA-24-1104 | UBAP2      | ENST00000379238 | p.D156H   | c.466G>C   | Verified   | ATT | GAT | TGC | 1 | G | C |
| TCGA-23-1123 | UBAP2L     | ENST00000361546 | p.Q483H   | c.1449G>C  | Verified   | CAG | CAG | AAA | 3 | G | C |
| TCGA-23-1123 | UBAP2L     | ENST00000361546 | p.Q483H   | c.1449G>C  | Verified   | CAG | CAG | AAA | 3 | G | C |
| TCGA-61-1740 | UBE3C      | ENST00000348165 | p.L670F   | c.2010G>C  | Unverified | ggt | ttg | gag | 3 | G | C |
| TCGA-13-0920 | UBE4B      | ENST00000253251 | p.G1065G  | c.3195G>C  | Verified   | gca | ggg | atc | 3 | G | C |
| TCGA-13-0904 | UCHL5      | ENST00000367455 | p.D75H    | c.223G>C   | Verified   | CTT | GAC | ACG | 1 | G | C |

|              |            |                 |          |            |            |     |     |     |   |   |   |
|--------------|------------|-----------------|----------|------------|------------|-----|-----|-----|---|---|---|
| TCGA-61-1904 | UCP3       | ENST00000314032 | p.L207L  | c.621G>C   | Unverified | AAG | CTG | CTG | 3 | G | C |
| TCGA-29-1768 | UEVLD      | ENST00000543987 | p.G340R  | c.1018G>C  | Unverified | TCA | GGC | AAA | 1 | G | C |
| TCGA-29-1769 | UEVLD      | ENST00000543987 | p.W174C  | c.522G>C   | Unverified | AGC | TGG | GCA | 3 | G | C |
| TCGA-29-1768 | UEVLD_ENS  | ENST00000396197 | p.G340R  | c.1018G>C  | Unverified | TCA | GGC | AAA | 1 | G | C |
| TCGA-29-1769 | UEVLD_ENS  | ENST00000396197 | p.W174C  | c.522G>C   | Unverified | AGC | TGG | GCA | 3 | G | C |
| TCGA-24-2267 | UGT1A3     | ENST00000482026 | p.C281S  | c.842G>C   | Verified   | AAC | TGT | GCC | 2 | G | C |
| TCGA-25-1326 | UHRF1BP1   | ENST00000192788 | p.L661L  | c.1983G>C  | Verified   | CTT | CTG | CAC | 3 | G | C |
| TCGA-13-0916 | UNC13C     | ENST00000260323 | p.K1913N | c.5739G>C  | Verified   | CTA | AAG | CGA | 3 | G | C |
| TCGA-25-2392 | USH2A      | ENST00000307340 | p.G3754A | c.11261G>C | Verified   | ACT | GGA | GGT | 2 | G | C |
| TCGA-29-1775 | USP14      | ENST00000261601 | p.E490D  | c.1470G>C  | Unverified | gaa | gag | gaa | 3 | G | C |
| TCGA-13-0883 | USP2       | ENST00000260187 | p.Q355H  | c.1065G>C  | Verified   | AAT | CAG | CAG | 3 | G | C |
| TCGA-13-0795 | USP25      | ENST00000285679 | p.G946R  | c.2836G>C  | Verified   | tct | gga | gag | 1 | G | C |
| TCGA-29-1761 | USP28      | ENST00000003302 | p.R428T  | c.1283G>C  | Unverified | GAA | AGG | TAT | 2 | G | C |
| TCGA-13-0883 | USP34      | ENST00000398571 | p.Q282H  | c.846G>C   | Verified   | GAT | CAG | GAG | 3 | G | C |
| TCGA-13-1488 | USP40      | ENST00000450966 | p.R730T  | c.2189G>C  | Verified   | CTC | AGA | AAT | 2 | G | C |
| TCGA-09-1674 | USP42      | XM_374396.2     | p.S416S  | c.1248G>C  | Unverified | aac | tcg | tac | 3 | G | C |
| TCGA-09-1674 | USP42_ENS1 | ENST00000306177 | p.S288S  | c.864G>C   | Unverified | AAC | TCG | TAC | 3 | G | C |
| TCGA-13-1498 | USP53      | ENST00000274030 | p.D398H  | c.1192G>C  | Verified   | GGT | GAT | CAG | 1 | G | C |
| TCGA-61-1899 | USP7       | ENST00000344836 | p.R153P  | c.458G>C   | Unverified | CGT | CGT | ATT | 2 | G | C |
| TCGA-23-1022 | UST        | ENST00000367463 | p.D311H  | c.931G>C   | Verified   | AAA | GAC | CCA | 1 | G | C |
| TCGA-29-1761 | UTS2       | ENST00000054668 | p.E78Q   | c.232G>C   | Unverified | GCA | GAA | AGA | 1 | G | C |
| TCGA-29-1761 | UTS2_ENSTC | ENST00000361696 | p.E63Q   | c.187G>C   | Unverified | GCA | GAA | AGA | 1 | G | C |
| TCGA-29-1761 | UTS2_ENSTC | ENST00000377516 | p.E63Q   | c.187G>C   | Unverified | GCA | GAA | AGA | 1 | G | C |
| TCGA-23-2077 | VAV2       | ENST00000406606 | p.G168R  | c.502G>C   | Unverified | GGA | GGG | GAC | 1 | G | C |
| TCGA-25-1326 | VCPIP1     | ENST00000310421 | p.V480L  | c.1438G>C  | Verified   | cat | ggt | cct | 1 | G | C |
| TCGA-30-1718 | VCX        | ENST00000381059 | p.P5P    | c.15G>C    | Unverified | AAG | CCG | AGA | 3 | G | C |
| TCGA-29-1784 | VGLL3      | ENST00000398399 | p.A290P  | c.868G>C   | Unverified | TCT | GCT | ACC | 1 | G | C |
| TCGA-23-2078 | VNN1       | ENST00000367928 | p.C509S  | c.1526G>C  | Verified   | GTA | TGC | TCA | 2 | G | C |
| TCGA-04-1337 | VSIG2      | ENST00000326621 | p.G305R  | c.913G>C   | Unverified | AAG | GGG | TTC | 1 | G | C |
| TCGA-30-1718 | VSIG4      | ENST00000374737 | p.G48A   | c.143G>C   | Unverified | caa | ggc | tac | 2 | G | C |
| TCGA-09-2056 | WAPAL      | ENST00000298767 | p.G1173R | c.3517G>C  | Verified   | GTT | GGA | ACA | 1 | G | C |
| TCGA-30-1857 | WAPAL      | ENST00000298767 | p.K60N   | c.180G>C   | Unverified | CCG | AAG | AAA | 3 | G | C |
| TCGA-29-1784 | WBP2       | ENST00000254806 | p.G101R  | c.301G>C   | Unverified | GCG | GGA | GGT | 1 | G | C |
| TCGA-09-1674 | WDR11      | ENST00000263461 | p.E982Q  | c.2944G>C  | Unverified | CTA | GAA | AGG | 1 | G | C |

|              |           |                 |          |            |            |     |     |     |   |   |   |
|--------------|-----------|-----------------|----------|------------|------------|-----|-----|-----|---|---|---|
| TCGA-29-1775 | WDR23     | ENST00000559115 | p.R487P  | c.1460G>C  | Unverified | GTG | CGT | GAC | 2 | G | C |
| TCGA-29-1776 | WDR33     | ENST00000322313 | p.V52L   | c.154G>C   | Unverified | GCT | GTG | AAC | 1 | G | C |
| TCGA-29-1776 | WDR33_ENS | ENST00000409658 | p.V52L   | c.154G>C   | Unverified | GCT | GTG | AAC | 1 | G | C |
| TCGA-24-1463 | WDR43     | ENST00000296126 | p.D586H  | c.1756G>C  | Verified   | CCT | GAC | CTG | 1 | G | C |
| TCGA-24-1844 | WDR6      | ENST00000315574 | p.V956L  | c.2866G>C  | Unverified | ACT | GTC | CTG | 1 | G | C |
| TCGA-24-2289 | WDR66     | ENST00000288912 | p.S433T  | c.1298G>C  | Unverified | CAC | AGT | GCC | 2 | G | C |
| TCGA-04-1530 | WDR75     | ENST00000314761 | p.D794H  | c.2380G>C  | Verified   | CAG | GAT | ACA | 1 | G | C |
| TCGA-13-1507 | WFIKKN2   | ENST00000311378 | p.E162D  | c.486G>C   | Verified   | GCC | GAG | GCC | 3 | G | C |
| TCGA-04-1338 | WHSC1     | ENST00000382891 | p.E1087Q | c.3259G>C  | Verified   | GGA | GAA | TTT | 1 | G | C |
| TCGA-24-2288 | WHSC1L1   | ENST00000316985 | p.W275S  | c.824G>C   | Unverified | GTG | TGG | TCC | 2 | G | C |
| TCGA-20-0990 | WIF1      | ENST00000286574 | p.?      | c.288+1G>C | Unverified | GGG | CAG | GCA | 3 | G | C |
| TCGA-20-0990 | WIF1_ENST | ENST00000286574 | p.?      | c.288+1G>C | Unverified | GGG | CAG | GCA | 3 | G | C |
| TCGA-13-0913 | WNT7A     | ENST00000285018 | p.E199Q  | c.595G>C   | Verified   | CTG | GAA | TGT | 1 | G | C |
| TCGA-13-1498 | WNT8A     | ENST00000398754 | p.V25L   | c.73G>C    | Verified   | TCA | GTG | AAC | 1 | G | C |
| TCGA-13-0884 | XIRP1     | ENST00000340369 | p.G545A  | c.1634G>C  | Verified   | GCT | GGG | GAC | 2 | G | C |
| TCGA-29-1775 | XIRP2     | ENST00000295237 | p.T2475T | c.7425G>C  | Unverified | CAC | ACG | GAG | 3 | G | C |
| TCGA-24-1422 | XPC       | ENST00000285021 | p.G757R  | c.2269G>C  | Unverified | TTT | GGG | AAT | 1 | G | C |
| TCGA-29-1770 | XPC       | ENST00000285021 | p.E518D  | c.1554G>C  | Unverified | GGT | GAG | AAG | 3 | G | C |
| TCGA-04-1530 | XPNPEP3   | ENST00000357137 | p.S504T  | c.1511G>C  | Unverified | TGC | AGC | CAG | 2 | G | C |
| TCGA-13-0714 | XPO6      | ENST00000304658 | p.G801R  | c.2401G>C  | Verified   | TCG | GGG | GAG | 1 | G | C |
| TCGA-24-0979 | XPOT      | ENST00000332707 | p.C268S  | c.803G>C   | Verified   | ttg | tgt | caa | 2 | G | C |
| TCGA-24-2024 | XPOT      | ENST00000332707 | p.V775V  | c.2325G>C  | Verified   | gaa | gtg | ctg | 3 | G | C |
| TCGA-13-1488 | XRCC1     | ENST00000262887 | p.R246T  | c.737G>C   | Verified   | AAG | AGG | AAG | 2 | G | C |
| TCGA-61-1907 | XRCC1     | ENST00000262887 | p.P514P  | c.1542G>C  | Unverified | GAC | CCG | TAT | 3 | G | C |
| TCGA-29-1761 | XYLT2     | ENST00000017003 | p.C581S  | c.1742G>C  | Unverified | CTC | TGC | AGG | 2 | G | C |
| TCGA-09-2050 | YME1L1    | ENST00000326799 | p.L211F  | c.633G>C   | Verified   | ACT | TTG | AAA | 3 | G | C |
| TCGA-24-2290 | ZBP1      | ENST00000371173 | p.K148N  | c.444G>C   | Verified   | ATG | AAG | AGC | 3 | G | C |
| TCGA-24-2290 | ZBP1      | ENST00000371173 | p.K148N  | c.444G>C   | Verified   | ATG | AAG | AGC | 3 | G | C |
| TCGA-29-1763 | ZBTB11    | ENST00000312938 | p.V1042L | c.3124G>C  | Unverified | ACT | GTT | AAA | 1 | G | C |
| TCGA-13-0923 | ZBTB20    | ENST00000357258 | p.V272L  | c.814G>C   | Verified   | AGG | GTG | CAG | 1 | G | C |
| TCGA-13-0920 | ZBTB49    | ENST00000337872 | p.D291H  | c.871G>C   | Verified   | TCA | GAC | GCC | 1 | G | C |
| TCGA-09-2051 | ZC3H13    | ENST00000282007 | p.K385N  | c.1155G>C  | Unverified | AGA | AAG | CAG | 3 | G | C |
| TCGA-13-1501 | ZC3H14    | ENST00000251038 | p.R278T  | c.833G>C   | Verified   | TTT | AGA | AAC | 2 | G | C |
| TCGA-13-1501 | ZC3H14    | ENST00000251038 | p.R278T  | c.833G>C   | Verified   | TTT | AGA | AAC | 2 | G | C |



|              |            |                 |          |           |            |     |     |     |   |   |   |
|--------------|------------|-----------------|----------|-----------|------------|-----|-----|-----|---|---|---|
| TCGA-04-1338 | ZCCHC17    | ENST00000373714 | p.R80T   | c.239G>C  | Verified   | GAT | AGA | ATA | 2 | G | C |
| TCGA-23-1031 | ZCCHC5     | ENST00000321110 | p.S260T  | c.779G>C  | Verified   | tat | agt | tac | 2 | G | C |
| TCGA-13-0919 | ZFH3       | ENST00000268489 | p.V815V  | c.2445G>C | Unverified | AAC | GTG | GCC | 3 | G | C |
| TCGA-23-1021 | ZFP2       | ENST00000361362 | p.E190D  | c.570G>C  | Verified   | AAA | GAG | TGT | 3 | G | C |
| TCGA-13-0883 | ZFP91      | ENST00000316059 | p.L499F  | c.1497G>C | Verified   | CCC | TTG | GGA | 3 | G | C |
| TCGA-13-0883 | ZFP91-CNTF | ENST00000389919 | p.L499F  | c.1497G>C | Verified   | CCC | TTG | GGA | 3 | G | C |
| TCGA-29-1691 | ZFYVE20    | ENST00000253699 | p.G607R  | c.1819G>C | Unverified | GTT | GGC | CAG | 1 | G | C |
| TCGA-23-2077 | ZGLP1      | ENST00000403903 | p.K255N  | c.765G>C  | Verified   | CCC | AAG | AGG | 3 | G | C |
| TCGA-24-2035 | ZHX2       | ENST00000314393 | p.G601A  | c.1802G>C | Verified   | aaa | ggc | caa | 2 | G | C |
| TCGA-29-1781 | ZKSCAN2    | ENST00000328086 | p.K563N  | c.1689G>C | Unverified | CGC | AAG | GTG | 3 | G | C |
| TCGA-20-1683 | ZKSCAN4    | ENST00000377294 | p.G183R  | c.547G>C  | Unverified | CTG | GGA | TCC | 1 | G | C |
| TCGA-25-1313 | ZKSCAN4    | ENST00000377294 | p.G523A  | c.1568G>C | Verified   | AAA | GGT | TTC | 2 | G | C |
| TCGA-25-1326 | ZKSCAN5    | ENST00000394170 | p.K337N  | c.1011G>C | Verified   | CCT | AAG | CAA | 3 | G | C |
| TCGA-30-1718 | ZMAT2      | ENST00000274712 | p.G4R    | c.10G>C   | Unverified | TCG | GGC | AGC | 1 | G | C |
| TCGA-13-0762 | ZMYM4      | ENST00000314607 | p.L845F  | c.2535G>C | Unverified | ATC | TTG | ATG | 3 | G | C |
| TCGA-13-0762 | ZMYM4      | ENST00000314607 | p.L845F  | c.2535G>C | Unverified | ATC | TTG | ATG | 3 | G | C |
| TCGA-13-1510 | ZMYND15    | ENST00000269289 | p.R639T  | c.1916G>C | Unverified | CTC | AGA | GCG | 2 | G | C |
| TCGA-29-1766 | ZNF138     | ENST00000359735 | p.E218Q  | c.652G>C  | Unverified | ACT | GAA | GAG | 1 | G | C |
| TCGA-29-1766 | ZNF138_ENS | ENST00000440155 | p.E249Q  | c.745G>C  | Unverified | ACT | GAA | GAG | 1 | G | C |
| TCGA-24-2267 | ZNF142     | ENST00000396788 | p.L397L  | c.1191G>C | Verified   | GTG | CTG | AGC | 3 | G | C |
| TCGA-24-1845 | ZNF160     | ENST00000429604 | p.K454N  | c.1362G>C | Unverified | TAC | AAG | TGT | 3 | G | C |
| TCGA-13-1481 | ZNF169     | ENST00000395395 | p.S226T  | c.677G>C  | Verified   | TCA | AGC | CTG | 2 | G | C |
| TCGA-13-1501 | ZNF184     | ENST00000377419 | p.G442A  | c.1325G>C | Verified   | ACT | GGG | GAG | 2 | G | C |
| TCGA-13-1501 | ZNF184     | ENST00000377419 | p.G442A  | c.1325G>C | Verified   | ACT | GGG | GAG | 2 | G | C |
| TCGA-61-2109 | ZNF20_ENS1 | ENST00000334213 | p.C204S  | c.611G>C  | Unverified | TTT | TGT | GGG | 2 | G | C |
| TCGA-25-2398 | ZNF217     | ENST00000371471 | p.C999S  | c.2996G>C | Verified   | ACT | TGT | GTG | 2 | G | C |
| TCGA-61-1907 | ZNF236     | ENST00000253159 | p.L839F  | c.2517G>C | Unverified | CAG | TTG | GCA | 3 | G | C |
| TCGA-61-1907 | ZNF236_ENS | ENST00000543926 | p.L839F  | c.2517G>C | Unverified | CAG | TTG | GCA | 3 | G | C |
| TCGA-25-1313 | ZNF25      | ENST00000302609 | p.C263S  | c.788G>C  | Verified   | GAG | TGT | GGG | 2 | G | C |
| TCGA-23-1022 | ZNF324B    | ENST00000336614 | p.S298S  | c.894G>C  | Verified   | ACG | TCG | CAC | 3 | G | C |
| TCGA-29-1785 | ZNF335     | ENST00000322927 | p.A1104P | c.3310G>C | Unverified | TTT | GCA | TGC | 1 | G | C |
| TCGA-29-1785 | ZNF335     | ENST00000322927 | p.A1104P | c.3310G>C | Unverified | TTT | GCA | TGC | 1 | G | C |
| TCGA-24-1463 | ZNF341     | ENST00000342427 | p.K461N  | c.1383G>C | Verified   | CAT | AAG | AAT | 3 | G | C |
| TCGA-29-1776 | ZNF343     | ENST00000278772 | p.E385Q  | c.1153G>C | Unverified | CTG | GAG | TGT | 1 | G | C |

|              |            |                 |          |            |            |     |     |     |   |   |   |
|--------------|------------|-----------------|----------|------------|------------|-----|-----|-----|---|---|---|
| TCGA-13-0791 | ZNF354C    | ENST00000315475 | p.E131Q  | c.391G>C   | Verified   | TTT | GAG | AGC | 1 | G | C |
| TCGA-13-0890 | ZNF429     | ENST00000358491 | p.R67P   | c.200G>C   | Verified   | AAG | CGA | CAT | 2 | G | C |
| TCGA-25-2398 | ZNF441_ENS | ENST00000357901 | p.E395Q  | c.1183G>C  | Unverified | TGT | GAA | TGT | 1 | G | C |
| TCGA-61-2109 | ZNF45      | ENST00000269973 | p.G452A  | c.1355G>C  | Unverified | AAG | GGC | TTC | 2 | G | C |
| TCGA-29-1769 | ZNF473     | ENST00000391821 | p.G155R  | c.463G>C   | Unverified | AGA | GGA | CTC | 1 | G | C |
| TCGA-29-1781 | ZNF473     | ENST00000391821 | p.Q198H  | c.594G>C   | Unverified | AGC | CAG | CAG | 3 | G | C |
| TCGA-23-1021 | ZNF479     | ENST00000331162 | p.R345T  | c.1034G>C  | Unverified | AAG | AGA | ATT | 2 | G | C |
| TCGA-23-1117 | ZNF496     | ENST00000294753 | p.E344Q  | c.1030G>C  | Verified   | CTA | GAG | AAC | 1 | G | C |
| TCGA-23-1117 | ZNF496     | ENST00000294753 | p.E344Q  | c.1030G>C  | Verified   | CTA | GAG | AAC | 1 | G | C |
| TCGA-24-1469 | ZNF516     | ENST00000217537 | p.G720R  | c.2158G>C  | Verified   | TCT | GGG | GGA | 1 | G | C |
| TCGA-29-1763 | ZNF521     | NM_015461.1     | p.E109Q  | c.325G>C   | Unverified | gga | gag | gaa | 1 | G | C |
| TCGA-29-1763 | ZNF521     | NM_015461.1     | p.G793A  | c.2378G>C  | Unverified | ttt | ggc | acc | 2 | G | C |
| TCGA-25-2393 | ZNF536     | ENST00000355537 | p.G871R  | c.2611G>C  | Verified   | TCG | GGG | CAG | 1 | G | C |
| TCGA-29-1762 | ZNF552     | ENST00000391701 | p.R322T  | c.965G>C   | Unverified | GAA | AGG | CCA | 2 | G | C |
| TCGA-20-0991 | ZNF572     | ENST00000319286 | p.C417S  | c.1250G>C  | Verified   | GAG | TGC | TGG | 2 | G | C |
| TCGA-13-0903 | ZNF592     | ENST00000299927 | p.E1062Q | c.3184G>C  | Verified   | CTG | GAG | AGC | 1 | G | C |
| TCGA-25-2401 | ZNF605     | ENST00000360187 | p.E9Q    | c.25G>C    | Verified   | TTT | GAG | GAT | 1 | G | C |
| TCGA-61-1733 | ZNF608     | ENST00000306315 | p.E1278D | c.3834G>C  | Unverified | AAA | GAG | AGT | 3 | G | C |
| TCGA-61-1733 | ZNF608     | ENST00000306315 | p.E1278D | c.3834G>C  | Unverified | AAA | GAG | AGT | 3 | G | C |
| TCGA-61-1915 | ZNF618     | ENST00000288466 | p.E232Q  | c.694G>C   | Unverified | AAA | GAA | GTT | 1 | G | C |
| TCGA-61-1915 | ZNF618_ENS | ENST00000288466 | p.E232Q  | c.694G>C   | Unverified | AAA | GAA | GTT | 1 | G | C |
| TCGA-20-1686 | ZNF638     | ENST00000264447 | p.D1539H | c.4615G>C  | Unverified | TTG | GAT | GAA | 1 | G | C |
| TCGA-61-1913 | ZNF645     | ENST00000323684 | p.R69P   | c.206G>C   | Unverified | ggg | cga | ata | 2 | G | C |
| TCGA-24-1844 | ZNF665     | ENST00000396424 | p.G455R  | c.1363G>C  | Unverified | GGA | GAA | AAG | 1 | G | C |
| TCGA-24-1844 | ZNF665_ENS | ENST00000396424 | p.G520R  | c.1558G>C  | Unverified | TGT | GGC | AAA | 1 | G | C |
| TCGA-61-1910 | ZNF673     | ENST00000298190 | p.K107N  | c.321G>C   | Unverified | GGC | AAG | GAA | 3 | G | C |
| TCGA-23-1022 | ZNF724P    | ENST00000418100 | p.G390A  | c.1169G>C  | Verified   | ACT | GGA | GAA | 2 | G | C |
| TCGA-29-1775 | ZNF732_ENS | ENST00000419098 | p.C423S  | c.1268G>C  | Unverified | GAG | TGT | GGC | 2 | G | C |
| TCGA-25-1326 | ZNF746     | ENST00000340622 | p.R346P  | c.1037G>C  | Unverified | CTG | CGA | GAG | 2 | G | C |
| TCGA-61-1900 | ZNF804A    | ENST00000302277 | p.?      | c.255+1G>C | Unverified | AAG | CAG | AGG | 3 | G | C |
| TCGA-04-1542 | ZNF828     | ENST00000361283 | p.D89H   | c.265G>C   | Unverified | CCA | GAC | AAA | 1 | G | C |
| TCGA-09-1665 | ZNF828     | ENST00000361283 | p.G474R  | c.1420G>C  | Verified   | CGT | GGT | GGT | 1 | G | C |
| TCGA-23-1111 | ZNF828     | ENST00000361283 | p.R769P  | c.2306G>C  | Unverified | CCA | CGT | TGT | 2 | G | C |
| TCGA-24-1470 | ZNF91_ENS  | ENST00000300619 | p.R171T  | c.512G>C   | Verified   | AAC | AGA | CAT | 2 | G | C |

|              |        |                 |          |             |            |     |     |     |   |   |   |
|--------------|--------|-----------------|----------|-------------|------------|-----|-----|-----|---|---|---|
| TCGA-13-0920 | ZSCAN2 | ENST00000448803 | p.G144G  | c.432G>C    | Verified   | AAT | GGG | GAG | 3 | G | C |
| TCGA-04-1638 | ZSWIM1 | ENST00000372523 | p.E140Q  | c.418G>C    | Unverified | TGG | GAG | AGA | 1 | G | C |
| TCGA-61-1740 | ZSWIM2 | ENST00000295131 | p.K305N  | c.915G>C    | Unverified | GAA | AAG | ATG | 3 | G | C |
| TCGA-13-0762 | ZW10   | ENST00000200135 | p.?      | c.1584-1G>C | Unverified | cac | aag | gag | 3 | G | C |
| TCGA-13-0762 | ZW10   | ENST00000200135 | p.?      | c.1584-1G>C | Unverified | cac | aag | gag | 3 | G | C |
| TCGA-24-2262 | ZXDB   | ENST00000374888 | p.R598T  | c.1793G>C   | Unverified | cag | aga | cag | 2 | G | C |
| TCGA-09-2051 | ZZEF1  | ENST00000381638 | p.G1953A | c.5858G>C   | Unverified | CAG | GGA | AAA | 2 | G | C |
| TCGA-25-2393 | AACS   | ENST00000316519 | p.D523Y  | c.1567G>T   | Unverified | GGC | GAC | TAC | 1 | G | T |
| TCGA-24-1103 | AASDH  | ENST00000205214 | p.S641I  | c.1922G>T   | Verified   | AAG | AGT | TGT | 2 | G | T |
| TCGA-24-1435 | ABCA4  | ENST00000370225 | p.V552L  | c.1654G>T   | Verified   | GTG | GTA | TTC | 1 | G | T |
| TCGA-61-2009 | ABCA8  | ENST00000269080 | p.D726Y  | c.2176G>T   | Verified   | CTT | GAT | AGC | 1 | G | T |
| TCGA-23-2077 | ABCB1  | ENST00000265724 | p.G722V  | c.2165G>T   | Verified   | aat | gga | ggc | 2 | G | T |
| TCGA-20-1683 | ABCC1  | ENST00000399410 | p.V987V  | c.2961G>T   | Unverified | CAT | GTG | TCC | 3 | G | T |
| TCGA-13-0920 | ABCC10 | ENST00000244533 | p.A1367S | c.4099G>T   | Verified   | AGG | GCT | CTC | 1 | G | T |
| TCGA-23-1110 | ABCC11 | ENST00000356608 | p.E782*  | c.2344G>T   | Verified   | GAG | GAG | ATG | 1 | G | T |
| TCGA-25-2392 | ABCC8  | ENST00000389817 | p.D1354Y | c.4060G>T   | Verified   | TAC | GAC | AGC | 1 | G | T |
| TCGA-04-1356 | ABCG5  | ENST00000260645 | p.L394L  | c.1182G>T   | Verified   | AAT | CTG | ATC | 3 | G | T |
| TCGA-61-1725 | ABHD10 | ENST00000273359 | p.V175L  | c.523G>T    | Unverified | GGT | GTA | GCT | 1 | G | T |
| TCGA-29-1763 | ACACB  | ENST00000377848 | p.E593*  | c.1777G>T   | Unverified | ACA | GAA | ATG | 1 | G | T |
| TCGA-13-0903 | ACACB  | ENST00000377848 | p.M1253I | c.3759G>T   | Verified   | GAC | ATG | TAC | 3 | G | T |
| TCGA-04-1367 | ACAD11 | ENST00000264990 | p.A5S    | c.13G>T     | Unverified | GGT | GCT | ACT | 1 | G | T |
| TCGA-13-0923 | ACAD9  | ENST00000308982 | p.G267V  | c.800G>T    | Verified   | CGG | GGC | TCC | 2 | G | T |
| TCGA-61-1906 | ACCN2  | ENST00000228468 | p.V362L  | c.1084G>T   | Unverified | TGC | GTG | TGT | 1 | G | T |
| TCGA-61-1906 | ACCN2  | ENST00000228468 | p.V362L  | c.1084G>T   | Unverified | TGC | GTG | TGT | 1 | G | T |
| TCGA-23-2077 | ACOT12 | ENST00000307624 | p.C40F   | c.119G>T    | Unverified | GCC | TGC | CTG | 2 | G | T |
| TCGA-24-1431 | ACOT9  | ENST00000336430 | p.V280F  | c.838G>T    | Verified   | cga | gtt | tta | 1 | G | T |
| TCGA-24-2289 | ACSM5  | ENST00000331849 | p.C343F  | c.1028G>T   | Unverified | CAC | TGT | CTG | 2 | G | T |
| TCGA-30-1857 | ACTA1  | ENST00000366684 | p.G50C   | c.148G>T    | Unverified | ATG | GGT | CAG | 1 | G | T |
| TCGA-24-1423 | ACTL6B | ENST00000160382 | p.E385*  | c.1153G>T   | Verified   | ATG | GAG | CGC | 1 | G | T |
| TCGA-20-1685 | ACTN2  | ENST00000366578 | p.A476S  | c.1426G>T   | Unverified | GAC | GCT | GTG | 1 | G | T |
| TCGA-13-1497 | ACTN2  | ENST00000366578 | p.R407M  | c.1220G>T   | Verified   | TTC | AGG | CAG | 2 | G | T |
| TCGA-25-2391 | ACTR3B | ENST00000256001 | p.E402D  | c.1206G>T   | Unverified | GAA | GAG | TAC | 3 | G | T |
| TCGA-13-0904 | ACVR1  | ENST00000263640 | p.G69V   | c.206G>T    | Verified   | AAA | GGC | TGC | 2 | G | T |
| TCGA-13-0886 | ADAM19 | NM_023038.2     | p.L720L  | c.2160G>T   | Verified   | atg | ctg | atg | 3 | G | T |

|              |           |                 |          |             |            |     |     |     |   |   |   |
|--------------|-----------|-----------------|----------|-------------|------------|-----|-----|-----|---|---|---|
| TCGA-61-1906 | ADAM2     | ENST00000265708 | p.G424V  | c.1271G>T   | Unverified | gcc | ggt | tca | 2 | G | T |
| TCGA-61-1906 | ADAM2     | ENST00000265708 | p.G424V  | c.1271G>T   | Unverified | gcc | ggt | tca | 2 | G | T |
| TCGA-04-1347 | ADAM29    | ENST00000359240 | p.G335V  | c.1004G>T   | Verified   | CTA | GGT | CAT | 2 | G | T |
| TCGA-29-1769 | ADAMTS18  | ENST00000282849 | p.T65T   | c.195G>T    | Unverified | gtc | acg | cca | 3 | G | T |
| TCGA-04-1652 | ADAMTS2   | ENST00000251582 | p.A540S  | c.1618G>T   | Unverified | TGT | GCA | CCT | 1 | G | T |
| TCGA-04-1652 | ADAMTS2   | ENST00000251582 | p.A540S  | c.1618G>T   | Unverified | TGT | GCA | CCT | 1 | G | T |
| TCGA-13-0793 | ADAMTS4   | ENST00000367996 | p.V785F  | c.2353G>T   | Verified   | CAA | GTC | CTA | 1 | G | T |
| TCGA-61-1900 | ADAMTS4   | ENST00000367996 | p.V714F  | c.2140G>T   | Unverified | CTT | GTC | CGG | 1 | G | T |
| TCGA-61-1900 | ADAMTS4_E | ENST00000367996 | p.V714F  | c.2140G>T   | Unverified | CTT | GTC | CGG | 1 | G | T |
| TCGA-24-1845 | ADAMTS7   | ENST00000388820 | p.A1675S | c.5023G>T   | Unverified | GGC | GCC | CCC | 1 | G | T |
| TCGA-13-0913 | ADAMTSL1_ | ENST00000380548 | p.K868N  | c.2604G>T   | Verified   | AGG | AAG | GTC | 3 | G | T |
| TCGA-29-1711 | ADAMTSL3  | ENST00000286744 | p.R1207M | c.3620G>T   | Unverified | AAA | AGG | ACA | 2 | G | T |
| TCGA-29-1711 | ADAMTSL3  | ENST00000286744 | p.R1207M | c.3620G>T   | Unverified | AAA | AGG | ACA | 2 | G | T |
| TCGA-61-1998 | ADAR      | ENST00000368474 | p.A319S  | c.955G>T    | Verified   | TTG | GCT | AAA | 1 | G | T |
| TCGA-61-1740 | ADCK1     | ENST00000341211 | p.G162W  | c.484G>T    | Unverified | gaa | ggg | agg | 1 | G | T |
| TCGA-61-1740 | ADCK1_ENS | ENST00000238561 | p.G230W  | c.688G>T    | Unverified | GAA | GGG | AGG | 1 | G | T |
| TCGA-25-2391 | ADCY10    | ENST00000367851 | p.G408C  | c.1222G>T   | Unverified | ATT | GGT | CAA | 1 | G | T |
| TCGA-61-1740 | ADCY2     | ENST00000338316 | p.G298C  | c.892G>T    | Unverified | GTT | GGC | TTT | 1 | G | T |
| TCGA-24-1469 | ADCY9     | ENST00000294016 | p.C583F  | c.1748G>T   | Verified   | AGC | TGT | GCA | 2 | G | T |
| TCGA-24-1844 | ADH5      | ENST00000296412 | p.C174F  | c.521G>T    | Unverified | ggt | tgt | ggc | 2 | G | T |
| TCGA-61-2095 | ADNP2     | ENST00000262198 | p.V622F  | c.1864G>T   | Unverified | TCT | GTC | ACT | 1 | G | T |
| TCGA-24-1469 | ADORA3    | ENST00000241356 | p.M174I  | c.522G>T    | Verified   | AGA | ATG | GAC | 3 | G | T |
| TCGA-24-1846 | ADRA2A    | ENST00000280155 | p.G364W  | c.1090G>T   | Unverified | CGC | GGG | CGG | 1 | G | T |
| TCGA-13-0885 | ADRA2B    | ENST00000409345 | p.Q154H  | c.462G>T    | Verified   | GAC | CAG | GGC | 3 | G | T |
| TCGA-23-1120 | AFF2      | ENST00000370460 | p.D1073Y | c.3217G>T   | Verified   | GCT | GAT | TAT | 1 | G | T |
| TCGA-13-0714 | AFM       | ENST00000226355 | p.G225W  | c.673G>T    | Verified   | TGT | GGG | GCA | 1 | G | T |
| TCGA-61-1910 | AGBL1     | ENST00000421325 | p.?      | c.1849+1G>T | Unverified | TAT | GGG | ATG | 1 | G | T |
| TCGA-29-1761 | AGBL1     | ENST00000421325 | p.S400I  | c.1199G>T   | Unverified | AAT | AGT | CTC | 2 | G | T |
| TCGA-13-0886 | AHCTF1    | ENST00000391829 | p.A1182S | c.3544G>T   | Verified   | AAA | GCT | AAA | 1 | G | T |
| TCGA-29-1766 | AHNAK2_EN | ENST00000333244 | p.D3694Y | c.11080G>T  | Unverified | GCC | GAC | CTG | 1 | G | T |
| TCGA-24-1431 | AIFM3     | ENST00000399167 | p.G217V  | c.650G>T    | Unverified | GAG | GGC | TTC | 2 | G | T |
| TCGA-23-1124 | AKAP13    | ENST00000361243 | p.S1750I | c.5249G>T   | Verified   | gtc | agt | cgt | 2 | G | T |
| TCGA-04-1342 | AKAP8     | ENST00000269701 | p.R206L  | c.617G>T    | Unverified | atg | cgc | agc | 2 | G | T |
| TCGA-13-0887 | AKAP9     | NM_147171.1     | p.E3156* | c.9466G>T   | Verified   | cag | gag | cag | 1 | G | T |

|              |           |                 |          |           |            |     |     |     |   |   |   |
|--------------|-----------|-----------------|----------|-----------|------------|-----|-----|-----|---|---|---|
| TCGA-13-0887 | AKAP9_ENS | ENST00000356239 | p.E3152* | c.9454G>T | Verified   | CAG | GAG | CAG | 1 | G | T |
| TCGA-24-0979 | AKR7A3    | ENST00000361640 | p.A258S  | c.772G>T  | Unverified | GGC | GCC | AGC | 1 | G | T |
| TCGA-24-1845 | ALDH1L1   | ENST00000393434 | p.V860F  | c.2578G>T | Unverified | TTT | GTC | AAC | 1 | G | T |
| TCGA-24-1422 | ALG10B    | ENST00000308742 | p.K215N  | c.645G>T  | Unverified | CAA | AAG | AAG | 3 | G | T |
| TCGA-13-1510 | ALMS1     | ENST00000264448 | p.L214L  | c.642G>T  | Unverified | CCA | CTG | CTA | 3 | G | T |
| TCGA-13-1510 | ALOX15    | ENST00000570836 | p.G117C  | c.349G>T  | Verified   | gtg | ggc | gag | 1 | G | T |
| TCGA-24-1846 | ALOX15    | ENST00000570836 | p.D199Y  | c.595G>T  | Unverified | aag | gat | cta | 1 | G | T |
| TCGA-29-1761 | ALPK2_ENS | ENST00000361673 | p.V417F  | c.1249G>T | Unverified | AGA | GTC | TCC | 1 | G | T |
| TCGA-25-1318 | AMICA1    | ENST00000292067 | p.D201Y  | c.601G>T  | Verified   | GGG | GAC | ATT | 1 | G | T |
| TCGA-25-1318 | AMICA1    | ENST00000292067 | p.D201Y  | c.601G>T  | Verified   | GGG | GAC | ATT | 1 | G | T |
| TCGA-29-1702 | AMOTL1    | ENST00000433060 | p.V85L   | c.253G>T  | Unverified | GAG | GTG | GAA | 1 | G | T |
| TCGA-23-1124 | AMY2A     | ENST00000414303 | p.G435V  | c.1304G>T | Verified   | TTT | GGG | AGA | 2 | G | T |
| TCGA-30-1857 | ANAPC1    | ENST00000341068 | p.A1214S | c.3640G>T | Unverified | TCT | GCT | GCA | 1 | G | T |
| TCGA-25-2401 | ANAPC2    | ENST00000323927 | p.K625N  | c.1875G>T | Verified   | aag | aag | tat | 3 | G | T |
| TCGA-29-1763 | ANK2      | ENST00000357077 | p.D1558Y | c.4672G>T | Unverified | GAG | GAC | TTA | 1 | G | T |
| TCGA-25-2042 | ANKRD20A2 | ENST00000377601 | p.Q35H   | c.105G>T  | Unverified | CTG | CAG | AAG | 3 | G | T |
| TCGA-61-1914 | ANO6      | ENST00000320560 | p.M749I  | c.2247G>T | Unverified | GAC | ATG | ATC | 3 | G | T |
| TCGA-61-1914 | ANO6_ENS  | ENST00000425752 | p.M749I  | c.2247G>T | Unverified | GAC | ATG | ATC | 3 | G | T |
| TCGA-23-1120 | ANXA11    | ENST00000372234 | p.G38G   | c.114G>T  | Unverified | ATC | GGG | CTG | 3 | G | T |
| TCGA-13-0792 | AP3B2     | ENST00000261722 | p.E717D  | c.2151G>T | Verified   | AGT | GAG | TCC | 3 | G | T |
| TCGA-24-1422 | AP4B1     | ENST00000369569 | p.R512R  | c.1536G>T | Verified   | GTA | CGG | GAC | 3 | G | T |
| TCGA-29-1691 | AP4E1     | ENST00000261842 | p.A371S  | c.1111G>T | Unverified | CTG | GCT | CTT | 1 | G | T |
| TCGA-29-1781 | APC       | ENST00000457016 | p.S2794I | c.8381G>T | Unverified | AGC | AGC | GCA | 2 | G | T |
| TCGA-04-1347 | APP       | ENST00000346798 | p.L28L   | c.84G>T   | Verified   | GGC | CTG | CTG | 3 | G | T |
| TCGA-29-1695 | AQP2      | ENST00000199280 | p.E3*    | c.7G>T    | Unverified | TGG | GAG | CTC | 1 | G | T |
| TCGA-25-1326 | ARG1      | ENST00000368087 | p.V24L   | c.70G>T   | Verified   | GGG | GTG | GAA | 1 | G | T |
| TCGA-20-1685 | ARG2      | ENST00000261783 | p.E205*  | c.613G>T  | Unverified | CCT | GAA | CAT | 1 | G | T |
| TCGA-23-1110 | ARHGAP15  | ENST00000295095 | p.V162L  | c.484G>T  | Verified   | ACA | GTA | TCA | 1 | G | T |
| TCGA-24-2280 | ARHGAP32  | ENST00000392657 | p.V675F  | c.2023G>T | Unverified | CCT | GTC | AGT | 1 | G | T |
| TCGA-24-2280 | ARHGAP32_ | ENST00000310343 | p.V1024F | c.3070G>T | Unverified | CCT | GTC | AGT | 1 | G | T |
| TCGA-13-1481 | ARHGAP5   | ENST00000345122 | p.V224L  | c.670G>T  | Verified   | CTT | GTA | GTG | 1 | G | T |
| TCGA-30-1891 | ARHGAP9   | NM_032496.1     | p.W11C   | c.33G>T   | Unverified | tcc | tgg | ggg | 3 | G | T |
| TCGA-29-1784 | ARHGEF11  | ENST00000368194 | p.E1188D | c.3564G>T | Unverified | cta | gag | gac | 3 | G | T |
| TCGA-29-1770 | ARHGEF15  | ENST00000361926 | p.V425V  | c.1275G>T | Unverified | gag | gtg | gtg | 3 | G | T |

|              |            |                 |          |            |            |     |     |     |   |   |   |
|--------------|------------|-----------------|----------|------------|------------|-----|-----|-----|---|---|---|
| TCGA-24-1563 | ARHGEF18   | ENST00000319670 | p.M405I  | c.1215G>T  | Verified   | gcg | atg | ttt | 3 | G | T |
| TCGA-29-1703 | ARHGEF38   | ENST00000265154 | p.V168L  | c.502G>T   | Unverified | CAA | GTA | ATT | 1 | G | T |
| TCGA-29-1703 | ARHGEF38_  | ENST00000420470 | p.V168L  | c.502G>T   | Unverified | CAA | GTA | ATT | 1 | G | T |
| TCGA-20-1687 | ARHGEF40_  | ENST00000298694 | p.G359*  | c.1075G>T  | Unverified | GGA | GGA | GGA | 1 | G | T |
| TCGA-13-0760 | ARHGEF9    | XM_377014.1     | p.W190C  | c.570G>T   | Verified   | ttc | tgg | ata | 3 | G | T |
| TCGA-24-2267 | ARL11      | ENST00000282026 | p.V16L   | c.46G>T    | Unverified | GTG | GTG | ATG | 1 | G | T |
| TCGA-23-1122 | ARL13A     | XM_373358.3     | p.G107W  | c.319G>T   | Verified   | cat | ggg | ctt | 1 | G | T |
| TCGA-04-1362 | ARL15      | ENST00000332313 | p.V48F   | c.142G>T   | Verified   | AAC | GTC | GTG | 1 | G | T |
| TCGA-04-1530 | ARL8A      | ENST00000272217 | p.?      | c.373-1G>T | Verified   | ccg | gtc | tta | 1 | G | T |
| TCGA-04-1338 | ARMC4      | ENST00000305242 | p.D1019Y | c.3055G>T  | Verified   | CAG | GAT | CTC | 1 | G | T |
| TCGA-29-1768 | ARPC1B     | ENST00000252725 | p.R97R   | c.291G>T   | Unverified | AAC | CGG | GCT | 3 | G | T |
| TCGA-13-1497 | ARSI       | ENST00000328668 | p.G534W  | c.1600G>T  | Verified   | GAA | GGG | AGG | 1 | G | T |
| TCGA-09-1665 | ASAP3      | ENST00000336689 | p.A679A  | c.2037G>T  | Verified   | CAG | GCG | GGG | 3 | G | T |
| TCGA-23-1118 | ASNSD1     | ENST00000260952 | p.G329C  | c.985G>T   | Verified   | GGG | GGC | ATT | 1 | G | T |
| TCGA-61-1915 | ASNSD1     | ENST00000260952 | p.E66*   | c.196G>T   | Unverified | GTG | GAA | GAT | 1 | G | T |
| TCGA-24-1845 | ASPA       | ENST00000263080 | p.D66Y   | c.196G>T   | Unverified | ATT | GAC | TGT | 1 | G | T |
| TCGA-13-0900 | ATG9B      | ENST00000397266 | p.P254P  | c.762G>T   | Unverified | GGG | CCG | TTC | 3 | G | T |
| TCGA-24-1423 | ATG9B      | ENST00000397266 | p.W718C  | c.2154G>T  | Unverified | CTC | TGG | CGC | 3 | G | T |
| TCGA-24-2267 | ATP10A     | ENST00000356865 | p.A1211S | c.3631G>T  | Verified   | ATC | GCG | CTG | 1 | G | T |
| TCGA-61-2012 | ATP11B     | ENST00000323116 | p.A846S  | c.2536G>T  | Verified   | CAG | GCT | GCA | 1 | G | T |
| TCGA-13-0887 | ATP11B     | ENST00000323116 | p.K532N  | c.1596G>T  | Verified   | GAA | AAG | GCT | 3 | G | T |
| TCGA-20-1685 | ATP11C     | ENST00000327569 | p.G521*  | c.1561G>T  | Unverified | AAT | GGA | TAT | 1 | G | T |
| TCGA-24-1422 | ATP11C     | ENST00000327569 | p.L1132F | c.3396G>T  | Verified   | GTA | TTG | TAA | 3 | G | T |
| TCGA-20-1685 | ATP11C_ENS | ENST00000361648 | p.G521*  | c.1561G>T  | Unverified | AAT | GGA | TAT | 1 | G | T |
| TCGA-61-2008 | ATP12A     | ENST00000381946 | p.D587Y  | c.1759G>T  | Verified   | TTT | GAC | ATA | 1 | G | T |
| TCGA-13-0755 | ATP13A3    | ENST00000256031 | p.A774S  | c.2320G>T  | Verified   | ATT | GCT | GAA | 1 | G | T |
| TCGA-13-0906 | ATP13A4    | ENST00000342695 | p.V133V  | c.399G>T   | Verified   | AAA | GTG | CAG | 3 | G | T |
| TCGA-13-1501 | ATP1A3     | ENST00000302102 | p.Q920H  | c.2760G>T  | Verified   | GTC | CAG | TGG | 3 | G | T |
| TCGA-13-1501 | ATP1A3     | ENST00000302102 | p.Q920H  | c.2760G>T  | Verified   | GTC | CAG | TGG | 3 | G | T |
| TCGA-24-1463 | ATP2B2     | ENST00000383800 | p.E1131* | c.3391G>T  | Unverified | ATC | GAA | GAT | 1 | G | T |
| TCGA-04-1542 | ATP5EP2    | ENST00000381026 | p.V46L   | c.136G>T   | Verified   | ATT | GTG | AAA | 1 | G | T |
| TCGA-13-0904 | ATP8A2     | ENST00000381655 | p.E499D  | c.1497G>T  | Verified   | CAG | GAG | TTC | 3 | G | T |
| TCGA-04-1338 | ATP8B1     | ENST00000283684 | p.G1001W | c.3001G>T  | Verified   | ATG | GGG | CTG | 1 | G | T |
| TCGA-24-2289 | ATRNL1     | ENST00000355044 | p.G646V  | c.1937G>T  | Unverified | TCT | GGG | AAT | 2 | G | T |

|              |             |                 |          |            |            |     |     |     |   |   |   |
|--------------|-------------|-----------------|----------|------------|------------|-----|-----|-----|---|---|---|
| TCGA-61-2109 | AWAT2       | ENST00000276101 | p.G239V  | c.716G>T   | Unverified | cct | ggt | ggc | 2 | G | T |
| TCGA-13-0903 | AZI1        | ENST00000374782 | p.A327S  | c.979G>T   | Verified   | AAG | GCC | CGG | 1 | G | T |
| TCGA-61-2102 | B3GALT2     | ENST00000367434 | p.R336L  | c.1007G>T  | Verified   | CGC | CGT | TTG | 2 | G | T |
| TCGA-24-1470 | B3GALT4     | ENST00000451237 | p.G29V   | c.86G>T    | Verified   | TTG | GGG | GAG | 2 | G | T |
| TCGA-13-0904 | BAI1        | NM_001702.1     | p.R1473R | c.4419G>T  | Unverified | cgg | cgg | aag | 3 | G | T |
| TCGA-23-1031 | BARX2       | ENST00000281437 | p.E120D  | c.360G>T   | Unverified | AGC | GAG | TCA | 3 | G | T |
| TCGA-13-0791 | BBS9        | ENST00000242067 | p.E375*  | c.1123G>T  | Verified   | CGA | GAA | CTA | 1 | G | T |
| TCGA-13-0905 | BBX         | ENST00000415149 | p.G737G  | c.2211G>T  | Verified   | AGT | GGG | GAT | 3 | G | T |
| TCGA-13-0904 | BCHE        | ENST00000264381 | p.G311V  | c.932G>T   | Verified   | tat | ggg | act | 2 | G | T |
| TCGA-13-1498 | BCL9        | NM_004326.1     | p.S890S  | c.2670G>T  | Verified   | cca | tcg | cag | 3 | G | T |
| TCGA-61-1900 | BCORL1      | ENST00000218147 | p.A325S  | c.973G>T   | Unverified | tca | gct | ccg | 1 | G | T |
| TCGA-61-2008 | BDH1        | ENST00000392378 | p.G26V   | c.77G>T    | Verified   | AAT | GGA | GCA | 2 | G | T |
| TCGA-23-1021 | BMS1        | ENST00000374518 | p.G402W  | c.1204G>T  | Verified   | CTT | GGG | TCA | 1 | G | T |
| TCGA-61-2008 | BPTF        | ENST00000306378 | p.K1250N | c.3750G>T  | Verified   | TCC | AAG | AGT | 3 | G | T |
| TCGA-24-1847 | BRCA1       | ENST00000357654 | p.E111*  | c.331G>T   | Unverified | aag | gaa | aat | 1 | G | T |
| TCGA-29-1762 | BRCA2       | ENST00000380152 | p.E2906* | c.8716G>T  | Unverified | TAT | GAA | GCA | 1 | G | T |
| TCGA-29-1762 | BRCA2_ENS   | ENST00000544455 | p.E2906* | c.8716G>T  | Unverified | TAT | GAA | GCA | 1 | G | T |
| TCGA-24-1847 | BRD8        | ENST00000254900 | p.V698F  | c.2092G>T  | Unverified | TCT | GTC | TGT | 1 | G | T |
| TCGA-24-1847 | BRD8_ENST   | ENST00000230901 | p.V771F  | c.2311G>T  | Unverified | TCT | GTC | TGT | 1 | G | T |
| TCGA-13-1510 | BRD9        | ENST00000323510 | p.D437Y  | c.1309G>T  | Unverified | CAG | GAC | CTG | 1 | G | T |
| TCGA-24-1474 | BRSK1_ENST  | ENST00000309383 | p.D383Y  | c.1147G>T  | Unverified | GTG | GAT | TCT | 1 | G | T |
| TCGA-10-0930 | BRWD1       | ENST00000342449 | p.W395C  | c.1185G>T  | Verified   | ATT | TGG | AGA | 3 | G | T |
| TCGA-10-0930 | BRWD1       | ENST00000342449 | p.W395C  | c.1185G>T  | Verified   | ATT | TGG | AGA | 3 | G | T |
| TCGA-23-1124 | BSN         | ENST00000296452 | p.E3557D | c.10671G>T | Verified   | GAG | GAG | GGC | 3 | G | T |
| TCGA-13-0904 | BTBD8       | ENST00000342818 | p.K136N  | c.408G>T   | Verified   | AAA | AAG | ATA | 3 | G | T |
| TCGA-24-1104 | C10orf140   | ENST00000449193 | p.G862G  | c.2586G>T  | Verified   | GAT | GGG | GAT | 3 | G | T |
| TCGA-24-2262 | C10orf140_f | ENST00000449193 | p.K831N  | c.2493G>T  | Verified   | AAA | AAG | GTA | 3 | G | T |
| TCGA-04-1338 | C11orf30    | ENST00000334736 | p.V220F  | c.658G>T   | Verified   | GAA | GTT | CCA | 1 | G | T |
| TCGA-29-1698 | C11orf49    | ENST00000378615 | p.R6L    | c.17G>T    | Unverified | GAG | CGC | CTA | 2 | G | T |
| TCGA-29-1698 | C11orf49_Ef | ENST00000378618 | p.R6L    | c.17G>T    | Unverified | GAG | CGC | CTA | 2 | G | T |
| TCGA-24-1844 | C11orf54    | ENST00000528288 | p.E61*   | c.181G>T   | Unverified | GCA | GAA | GTT | 1 | G | T |
| TCGA-24-1474 | C11orf94    | ENST00000449465 | p.D59Y   | c.175G>T   | Unverified | GAT | GAC | TAT | 1 | G | T |
| TCGA-61-1910 | C12orf23    | ENST00000280756 | p.V102L  | c.304G>T   | Unverified | GTT | GTA | AAC | 1 | G | T |
| TCGA-23-1031 | C12orf40    | ENST00000324616 | p.S366I  | c.1097G>T  | Verified   | ACA | AGT | TAT | 2 | G | T |

|              |             |                     |          |             |            |     |     |     |   |   |   |
|--------------|-------------|---------------------|----------|-------------|------------|-----|-----|-----|---|---|---|
| TCGA-23-1809 | C12orf51    | ENST00000377560     | p.?      | c.9514-1G>T | Unverified | ATC | GGA | GGC | 1 | G | T |
| TCGA-04-1331 | C12orf51_E1 | ENST00000377560_v62 | p.E3835D | c.11505G>T  | Unverified | CCT | GAG | ATC | 3 | G | T |
| TCGA-13-1499 | C14orf178   | ENST00000355883     | p.A120S  | c.358G>T    | Verified   | GAT | GCC | ATG | 1 | G | T |
| TCGA-29-1762 | C14orf79    | ENST00000547315     | p.R198I  | c.593G>T    | Unverified | TGG | AGA | GCC | 2 | G | T |
| TCGA-61-1998 | C15orf2     | ENST00000329468     | p.R107S  | c.321G>T    | Verified   | CCG | AGG | TTT | 3 | G | T |
| TCGA-23-1122 | C15orf42    | ENST00000268138     | p.E1598* | c.4792G>T   | Verified   | GGA | GAA | GAG | 1 | G | T |
| TCGA-13-0883 | C15orf55    | ENST00000333756     | p.G807*  | c.2419G>T   | Verified   | CCA | GGA | CCT | 1 | G | T |
| TCGA-61-1900 | C16orf73    | ENST00000325962     | p.G160V  | c.479G>T    | Unverified | TTG | GGC | TGC | 2 | G | T |
| TCGA-61-1900 | C16orf73_E1 | ENST00000412554     | p.G404V  | c.1211G>T   | Unverified | TTG | GGC | TGC | 2 | G | T |
| TCGA-23-1110 | C16orf91    | ENST00000310355     | p.G23G   | c.69G>T     | Unverified | ACA | GGG | ACA | 3 | G | T |
| TCGA-24-1844 | C18orf26    | ENST00000321600     | p.E12*   | c.34G>T     | Unverified | ATT | GAA | AAA | 1 | G | T |
| TCGA-24-1849 | C1orf101    | ENST00000366533     | p.C71F   | c.212G>T    | Unverified | CGT | TGT | TCC | 2 | G | T |
| TCGA-24-1849 | C1orf101_E1 | ENST00000366534     | p.C71F   | c.212G>T    | Unverified | CGT | TGT | TCC | 2 | G | T |
| TCGA-23-1122 | C1orf106    | ENST00000367342     | p.G271G  | c.813G>T    | Verified   | GAT | GGG | CTC | 3 | G | T |
| TCGA-23-1114 | C1orf187    | ENST00000294485     | p.?      | c.757+1G>T  | Unverified | AAA | GAG | AAA | 1 | G | T |
| TCGA-25-2392 | C1orf50     | ENST00000372525     | p.D98Y   | c.292G>T    | Verified   | GAA | GAT | GCT | 1 | G | T |
| TCGA-61-1914 | C1orf87     | ENST00000371201     | p.L391F  | c.1173G>T   | Unverified | GAT | TTG | TTA | 3 | G | T |
| TCGA-13-0884 | C20orf152   | ENST00000349339     | p.D102Y  | c.304G>T    | Unverified | GAG | GAT | GAG | 1 | G | T |
| TCGA-29-1761 | C20orf194   | ENST00000252032     | p.?      | c.1468+1G>T | Unverified | AAG | GAT | GGC | 1 | G | T |
| TCGA-13-1489 | C21orf62    | ENST00000290186     | p.M60I   | c.180G>T    | Verified   | CTG | ATG | TGC | 3 | G | T |
| TCGA-24-1103 | C21orf63    | ENST00000300255     | p.S402I  | c.1205G>T   | Verified   | TAC | AGT | TCC | 2 | G | T |
| TCGA-04-1530 | C2orf18     | ENST00000344420     | p.A211S  | c.631G>T    | Unverified | CGG | GCA | GTT | 1 | G | T |
| TCGA-29-1691 | C2orf28     | ENST00000380171     | p.E222D  | c.666G>T    | Unverified | CCT | GAG | AAT | 3 | G | T |
| TCGA-29-1711 | C2orf29     | ENST00000289382     | p.A331S  | c.991G>T    | Unverified | ATG | GCC | AAA | 1 | G | T |
| TCGA-29-1711 | C2orf29     | ENST00000289382     | p.A331S  | c.991G>T    | Unverified | ATG | GCC | AAA | 1 | G | T |
| TCGA-25-2042 | C2orf57     | ENST00000313965     | p.V73F   | c.217G>T    | Verified   | GCA | GTT | GTT | 1 | G | T |
| TCGA-13-1505 | C3orf20     | ENST00000253697     | p.G794W  | c.2380G>T   | Verified   | TTT | GGG | GGC | 1 | G | T |
| TCGA-29-1781 | C3orf20     | ENST00000253697     | p.R522L  | c.1565G>T   | Unverified | AAA | CGG | CTG | 2 | G | T |
| TCGA-61-2009 | C3orf30     | ENST00000295622     | p.G88C   | c.262G>T    | Verified   | GCT | GGC | CGC | 1 | G | T |
| TCGA-13-0919 | C3orf32     | ENST00000341795     | p.R120I  | c.359G>T    | Unverified | caa | aga | ggc | 2 | G | T |
| TCGA-25-2401 | C3orf35     | ENST00000328376     | p.G114V  | c.341G>T    | Unverified | CGT | GGA | ATC | 2 | G | T |
| TCGA-23-1117 | C4BPB       | ENST00000367076     | p.S161I  | c.482G>T    | Verified   | ATT | AGT | TAT | 2 | G | T |
| TCGA-23-1117 | C4BPB       | ENST00000367076     | p.S161I  | c.482G>T    | Verified   | ATT | AGT | TAT | 2 | G | T |
| TCGA-13-1498 | C5AR1       | ENST00000355085     | p.L323F  | c.969G>T    | Verified   | GTG | TTG | ACT | 3 | G | T |



|              |            |                     |          |            |            |     |     |     |   |   |   |
|--------------|------------|---------------------|----------|------------|------------|-----|-----|-----|---|---|---|
| TCGA-04-1336 | C6orf106   | ENST00000374023     | p.T196T  | c.588G>T   | Verified   | GAA | ACG | GAG | 3 | G | T |
| TCGA-04-1338 | C6orf81    | ENST00000288065     | p.V278L  | c.832G>T   | Unverified | GAG | GTA | CTG | 1 | G | T |
| TCGA-23-1123 | C7orf42    | ENST00000341567     | p.G128V  | c.383G>T   | Verified   | GGA | GGG | TAT | 2 | G | T |
| TCGA-23-1123 | C7orf42    | ENST00000341567     | p.G128V  | c.383G>T   | Verified   | GGA | GGG | TAT | 2 | G | T |
| TCGA-13-0885 | C7orf49    | ENST00000361743     | p.A57S   | c.169G>T   | Verified   | CTG | GCG | GGG | 1 | G | T |
| TCGA-24-2280 | C8orf45    | ENST00000396592     | p.E429*  | c.1285G>T  | Unverified | CTG | GAG | AGC | 1 | G | T |
| TCGA-04-1338 | C8orf76    | ENST00000276704     | p.R359I  | c.1076G>T  | Verified   | ttc | aga | aag | 2 | G | T |
| TCGA-25-1313 | C9orf21    | ENST00000375234     | p.?      | c.315+1G>T | Unverified | ATT | GAG | CCT | 3 | G | T |
| TCGA-24-2280 | C9orf7     | ENST00000316948     | p.L140L  | c.420G>T   | Unverified | GCT | CTG | GGC | 3 | G | T |
| TCGA-13-0807 | C9orf84    | ENST00000394779     | p.K677N  | c.2031G>T  | Verified   | AAA | AAG | CCT | 3 | G | T |
| TCGA-13-0904 | CA5A       | ENST00000309893     | p.E250D  | c.750G>T   | Unverified | AAG | GAG | CCC | 3 | G | T |
| TCGA-25-1313 | CA9        | ENST00000378357     | p.S352I  | c.1055G>T  | Verified   | CTG | AGT | GCT | 2 | G | T |
| TCGA-13-1497 | CACNA1A_E  | ENST00000357018     | p.W597L  | c.1790G>T  | Verified   | TAC | TGG | GCA | 2 | G | T |
| TCGA-13-0887 | CACNA1C    | ENST00000402845     | p.A1777S | c.5329G>T  | Verified   | AGG | GCC | GGT | 1 | G | T |
| TCGA-13-0762 | CACNA1C    | ENST00000402845     | p.R1407L | c.4220G>T  | Verified   | TTC | CGC | CTG | 2 | G | T |
| TCGA-13-0762 | CACNA1C    | ENST00000402845     | p.R1407L | c.4220G>T  | Verified   | TTC | CGC | CTG | 2 | G | T |
| TCGA-13-1489 | CACNA1D    | ENST00000288139     | p.G29V   | c.86G>T    | Verified   | AGA | GGC | ACC | 2 | G | T |
| TCGA-24-2289 | CACNA1F    | ENST00000376265     | p.A1504S | c.4510G>T  | Unverified | gtg | gcc | tgc | 1 | G | T |
| TCGA-25-2400 | CACNA1H_E  | ENST00000358590     | p.G1321V | c.3962G>T  | Unverified | CCC | GGC | AGC | 2 | G | T |
| TCGA-24-2289 | CACNA1S    | ENST00000362061     | p.S506I  | c.1517G>T  | Unverified | TGT | AGC | GGT | 2 | G | T |
| TCGA-29-1763 | CACNA2D1   | ENST00000356860     | p.A913S  | c.2737G>T  | Unverified | GTA | GCA | GAC | 1 | G | T |
| TCGA-23-2078 | CACNA2D1   | ENST00000356860     | p.S936I  | c.2807G>T  | Verified   | TTG | AGT | TTG | 2 | G | T |
| TCGA-13-1498 | CADM1      | ENST00000452722     | p.V383L  | c.1147G>T  | Verified   | GCG | GTG | GTG | 1 | G | T |
| TCGA-61-2113 | CADPS2     | ENST00000449022     | p.M828I  | c.2484G>T  | Unverified | ACC | ATG | AAC | 3 | G | T |
| TCGA-10-0930 | CAGE1_ENS' | ENST00000338150     | p.V435L  | c.1303G>T  | Verified   | TCT | GTA | AGT | 1 | G | T |
| TCGA-10-0930 | CAGE1_ENS' | ENST00000338150     | p.V435L  | c.1303G>T  | Verified   | TCT | GTA | AGT | 1 | G | T |
| TCGA-24-1846 | CALCOCO1   | ENST00000550804     | p.E132*  | c.394G>T   | Unverified | GAG | GAG | GCT | 1 | G | T |
| TCGA-25-1326 | CAMSAP1    | ENST00000389532     | p.V1594V | c.4782G>T  | Unverified | GCA | GTG | CCA | 3 | G | T |
| TCGA-13-0906 | CAMSAP1L1  | ENST00000358823     | p.R754M  | c.2261G>T  | Verified   | CTT | AGG | ATG | 2 | G | T |
| TCGA-29-1696 | CAMSAP3    | ENST00000446248     | p.C1194F | c.3581G>T  | Unverified | AGC | TGC | CAG | 2 | G | T |
| TCGA-29-1696 | CAMSAP3    | ENST00000446248     | p.C1194F | c.3581G>T  | Unverified | AGC | TGC | CAG | 2 | G | T |
| TCGA-29-1696 | CAMSAP3_E  | ENST00000446248_v68 | p.C1194F | c.3581G>T  | Unverified | AGC | TGC | CAG | 2 | G | T |
| TCGA-29-1696 | CAMSAP3_E  | ENST00000446248_v68 | p.C1194F | c.3581G>T  | Unverified | AGC | TGC | CAG | 2 | G | T |
| TCGA-13-0885 | CAP2       | ENST00000229922     | p.G368V  | c.1103G>T  | Verified   | AAA | GGG | AAA | 2 | G | T |

|              |            |                 |          |           |            |     |     |     |   |   |   |
|--------------|------------|-----------------|----------|-----------|------------|-----|-----|-----|---|---|---|
| TCGA-24-1422 | CARD6      | ENST00000254691 | p.V218F  | c.652G>T  | Verified   | TCT | GTT | GAC | 1 | G | T |
| TCGA-20-0990 | CARS       | ENST00000397111 | p.G626V  | c.1877G>T | Verified   | CTT | GGG | GTG | 2 | G | T |
| TCGA-29-1777 | CASC1      | ENST00000320267 | p.V445L  | c.1333G>T | Unverified | AAT | GTA | ATC | 1 | G | T |
| TCGA-25-1318 | CASC1      | ENST00000320267 | p.E238D  | c.714G>T  | Verified   | TTT | GAG | ATT | 3 | G | T |
| TCGA-25-1318 | CASC1      | ENST00000320267 | p.E238D  | c.714G>T  | Verified   | TTT | GAG | ATT | 3 | G | T |
| TCGA-29-1777 | CASC1_ENST | ENST00000354189 | p.V509L  | c.1525G>T | Unverified | AAT | GTA | ATC | 1 | G | T |
| TCGA-13-0924 | CASK       | ENST00000378166 | p.E414*  | c.1240G>T | Verified   | TTG | GAA | GAA | 1 | G | T |
| TCGA-13-0762 | CASP7      | ENST00000369321 | p.V324L  | c.970G>T  | Verified   | tgt | gtg | gtc | 1 | G | T |
| TCGA-13-0762 | CASP7      | ENST00000369321 | p.V324L  | c.970G>T  | Verified   | tgt | gtg | gtc | 1 | G | T |
| TCGA-29-1781 | CASR       | ENST00000296154 | p.C585F  | c.1754G>T | Unverified | AAG | TGC | CCA | 2 | G | T |
| TCGA-29-1763 | CATSPERG   | ENST00000312265 | p.V675L  | c.2023G>T | Unverified | TTG | GTG | AGC | 1 | G | T |
| TCGA-13-0924 | CBLN4      | ENST00000064571 | p.D51Y   | c.151G>T  | Verified   | acg | gac | tcc | 1 | G | T |
| TCGA-29-1764 | CBWD1      | ENST00000356521 | p.S68I   | c.203G>T  | Unverified | CAT | AGT | AAA | 2 | G | T |
| TCGA-29-1698 | CCDC108    | ENST00000341552 | p.E157D  | c.471G>T  | Unverified | TGG | GAG | CTA | 3 | G | T |
| TCGA-29-1698 | CCDC108_EI | ENST00000295729 | p.E92D   | c.276G>T  | Unverified | TGG | GAG | CTA | 3 | G | T |
| TCGA-24-1422 | CCDC13     | ENST00000310232 | p.E52D   | c.156G>T  | Verified   | TTG | GAG | GTT | 3 | G | T |
| TCGA-61-1899 | CCDC141    | ENST00000343876 | p.G684V  | c.2051G>T | Unverified | CCA | GGG | GAT | 2 | G | T |
| TCGA-04-1338 | CCDC141    | ENST00000343876 | p.R494S  | c.1482G>T | Verified   | GAA | AGG | ATT | 3 | G | T |
| TCGA-61-1899 | CCDC141_EI | ENST00000420890 | p.G1259V | c.3776G>T | Unverified | CCA | GGG | GAT | 2 | G | T |
| TCGA-30-1891 | CCDC147    | ENST00000369704 | p.A508S  | c.1522G>T | Unverified | GAG | GCT | CAG | 1 | G | T |
| TCGA-23-1123 | CCDC148    | ENST00000283233 | p.V475L  | c.1423G>T | Verified   | GAA | GTG | GCC | 1 | G | T |
| TCGA-23-1123 | CCDC148    | ENST00000283233 | p.V475L  | c.1423G>T | Verified   | GAA | GTG | GCC | 1 | G | T |
| TCGA-29-1763 | CCDC155    | ENST00000447857 | p.Q507H  | c.1521G>T | Unverified | GGC | CAG | CTC | 3 | G | T |
| TCGA-04-1343 | CCDC165    | ENST00000359865 | p.C1504F | c.4511G>T | Verified   | ATG | TGC | AGG | 2 | G | T |
| TCGA-04-1343 | CCDC165    | ENST00000359865 | p.G1508V | c.4523G>T | Verified   | GAA | GGG | GGA | 2 | G | T |
| TCGA-13-0887 | CCDC39     | ENST00000273654 | p.E268*  | c.802G>T  | Verified   | TTG | GAA | TGT | 1 | G | T |
| TCGA-13-1499 | CCDC42     | ENST00000293845 | p.K92N   | c.276G>T  | Verified   | CAG | AAG | TCT | 3 | G | T |
| TCGA-61-1910 | CCDC88B    | ENST00000356786 | p.R64R   | c.192G>T  | Unverified | CTC | CGG | GTG | 3 | G | T |
| TCGA-24-1847 | CCIN       | ENST00000335119 | p.L139F  | c.417G>T  | Unverified | TTC | TTG | GCT | 3 | G | T |
| TCGA-24-1844 | CCL11      | ENST00000305869 | p.G21G   | c.63G>T   | Unverified | CAG | GGG | CTC | 3 | G | T |
| TCGA-13-1488 | CCNB3      | ENST00000376042 | p.K233N  | c.699G>T  | Verified   | AAG | AAG | AAG | 3 | G | T |
| TCGA-13-1488 | CCNB3_ENS  | ENST00000376042 | p.K233N  | c.699G>T  | Verified   | AAG | AAG | AAG | 3 | G | T |
| TCGA-09-2050 | CCR3       | ENST00000357422 | p.V56L   | c.166G>T  | Verified   | gtg | gtg | atg | 1 | G | T |
| TCGA-30-1714 | CCR9       | ENST00000357632 | p.K245N  | c.735G>T  | Unverified | gcc | aag | aag | 3 | G | T |

|              |           |                 |          |           |            |     |     |     |   |   |   |
|--------------|-----------|-----------------|----------|-----------|------------|-----|-----|-----|---|---|---|
| TCGA-13-1498 | CD1B      | ENST00000368168 | p.W295L  | c.884G>T  | Verified   | TAC | TGG | AGA | 2 | G | T |
| TCGA-09-0369 | CD1C      | ENST00000368170 | p.G252C  | c.754G>T  | Verified   | CAT | GGT | GAT | 1 | G | T |
| TCGA-09-0369 | CD1C      | ENST00000368170 | p.G252C  | c.754G>T  | Verified   | CAT | GGT | GAT | 1 | G | T |
| TCGA-29-1696 | CD226     | ENST00000280200 | p.W204L  | c.611G>T  | Unverified | AGG | TGG | AGC | 2 | G | T |
| TCGA-29-1696 | CD226     | ENST00000280200 | p.W204L  | c.611G>T  | Unverified | AGG | TGG | AGC | 2 | G | T |
| TCGA-23-1122 | CD300A    | ENST00000360141 | p.A138A  | c.414G>T  | Verified   | ACT | GCG | GCC | 3 | G | T |
| TCGA-24-0975 | CD4       | ENST00000011653 | p.W359C  | c.1077G>T | Unverified | GTG | TGG | GTG | 3 | G | T |
| TCGA-61-1913 | CD40      | ENST00000372285 | p.V218L  | c.652G>T  | Unverified | aag | gtg | gcc | 1 | G | T |
| TCGA-09-2056 | CD5L      | ENST00000368174 | p.R298L  | c.893G>T  | Verified   | GAC | CGG | AAA | 2 | G | T |
| TCGA-29-1691 | CD80      | ENST00000264246 | p.D205Y  | c.613G>T  | Unverified | CTG | GAT | TTC | 1 | G | T |
| TCGA-61-1900 | CD93      | ENST00000246006 | p.G113V  | c.338G>T  | Unverified | AAG | GGC | TTC | 2 | G | T |
| TCGA-23-1117 | CDC6      | ENST00000209728 | p.R445S  | c.1335G>T | Verified   | aac | agg | atg | 3 | G | T |
| TCGA-23-1117 | CDC6      | ENST00000209728 | p.R445S  | c.1335G>T | Verified   | aac | agg | atg | 3 | G | T |
| TCGA-29-1770 | CDCA8     | ENST00000373055 | p.M122I  | c.366G>T  | Unverified | GAA | ATG | ATA | 3 | G | T |
| TCGA-24-1470 | CDH10     | ENST00000264463 | p.D324Y  | c.970G>T  | Verified   | AAG | GAC | ACA | 1 | G | T |
| TCGA-24-1435 | CDH17     | ENST00000027335 | p.S484I  | c.1451G>T | Verified   | GGG | AGT | TCT | 2 | G | T |
| TCGA-61-2094 | CDH7      | ENST00000323011 | p.V499F  | c.1495G>T | Unverified | CAG | GTT | ATC | 1 | G | T |
| TCGA-61-2094 | CDH7_ENST | ENST00000323011 | p.V499F  | c.1495G>T | Unverified | CAG | GTT | ATC | 1 | G | T |
| TCGA-23-1117 | CDH8      | ENST00000577390 | p.P389P  | c.1167G>T | Verified   | CCT | CCG | GTC | 3 | G | T |
| TCGA-23-1117 | CDH8      | ENST00000577390 | p.P389P  | c.1167G>T | Verified   | CCT | CCG | GTC | 3 | G | T |
| TCGA-13-0906 | CDHR2     | ENST00000261944 | p.S83I   | c.248G>T  | Verified   | GCC | AGC | GCT | 2 | G | T |
| TCGA-25-2392 | CDK12     | NM_016507       | p.R882L  | c.2645G>T | Verified   | gct | cgg | ctc | 2 | G | T |
| TCGA-23-1110 | CDK13     | ENST00000181839 | p.G1050C | c.3148G>T | Verified   | CTG | GGC | TTG | 1 | G | T |
| TCGA-29-1781 | CDK13     | ENST00000181839 | p.L884L  | c.2652G>T | Unverified | GAA | CTG | CTA | 3 | G | T |
| TCGA-13-0807 | CDON      | ENST00000263577 | p.M655I  | c.1965G>T | Verified   | TTG | ATG | GTA | 3 | G | T |
| TCGA-25-2392 | CECR1     | ENST00000399837 | p.E234D  | c.702G>T  | Unverified | CAG | GAG | TTC | 3 | G | T |
| TCGA-09-1674 | CELA2A    | ENST00000359621 | p.V30F   | c.88G>T   | Unverified | GTG | GTT | GGC | 1 | G | T |
| TCGA-29-1690 | CELA3A    | ENST00000290122 | p.G243V  | c.728G>T  | Unverified | TTT | GGC | TGC | 2 | G | T |
| TCGA-13-1510 | CELSR3    | ENST00000164024 | p.A2235S | c.6703G>T | Unverified | CTG | GCC | CAC | 1 | G | T |
| TCGA-04-1367 | CELSR3    | ENST00000164024 | p.L897L  | c.2691G>T | Verified   | CTC | CTG | GAG | 3 | G | T |
| TCGA-29-1699 | CENPN_ENS | ENST00000393335 | p.P335P  | c.1005G>T | Unverified | GAC | CCG | AGC | 3 | G | T |
| TCGA-04-1347 | CEP135    | ENST00000257287 | p.R924I  | c.2771G>T | Verified   | GAA | AGA | GTG | 2 | G | T |
| TCGA-13-0791 | CEP290    | ENST00000552810 | p.S1594I | c.4781G>T | Verified   | GAT | AGT | TCA | 2 | G | T |
| TCGA-23-1111 | CEP350    | ENST00000367607 | p.E2234* | c.6700G>T | Unverified | AAA | GAA | TTA | 1 | G | T |

|              |            |                 |          |           |            |     |     |     |   |   |   |
|--------------|------------|-----------------|----------|-----------|------------|-----|-----|-----|---|---|---|
| TCGA-23-1111 | CEP350_ENS | ENST00000367607 | p.E2234* | c.6700G>T | Unverified | AAA | GAA | TTA | 1 | G | T |
| TCGA-04-1347 | CES1_ENST0 | ENST00000360526 | p.G143G  | c.429G>T  | Verified   | GGA | GGG | GGG | 3 | G | T |
| TCGA-13-1488 | CES3       | ENST00000303334 | p.D219Y  | c.655G>T  | Verified   | GGT | GAC | CTC | 1 | G | T |
| TCGA-29-1703 | CFH        | ENST00000367429 | p.G967W  | c.2899G>T | Unverified | gat | ggg | cct | 1 | G | T |
| TCGA-29-1761 | CFH        | ENST00000367429 | p.W1096C | c.3288G>T | Unverified | aac | tgg | acg | 3 | G | T |
| TCGA-13-0760 | CHAF1B     | ENST00000314103 | p.D38Y   | c.112G>T  | Verified   | GTG | GAC | ACC | 1 | G | T |
| TCGA-13-0887 | CHD1       | ENST00000284049 | p.K204N  | c.612G>T  | Verified   | aag | aag | att | 3 | G | T |
| TCGA-61-1895 | CHD3       | ENST00000330494 | p.R170S  | c.510G>T  | Unverified | ATG | AGG | CCC | 3 | G | T |
| TCGA-61-2109 | CHD4_ENST0 | ENST00000309577 | p.G1042C | c.3124G>T | Unverified | GAT | GGC | AGT | 1 | G | T |
| TCGA-25-2042 | CHD4_ENST0 | ENST00000309577 | p.R1434L | c.4301G>T | Verified   | GCC | CGT | GTT | 2 | G | T |
| TCGA-36-1577 | CHD4_ENST0 | ENST00000309577 | p.E698D  | c.2094G>T | Unverified | TTG | GAG | AGG | 3 | G | T |
| TCGA-24-2289 | CHI3L1     | ENST00000255409 | p.G248G  | c.744G>T  | Unverified | CTG | GGG | GCT | 3 | G | T |
| TCGA-61-1900 | CHI3L2     | ENST00000369748 | p.G250V  | c.749G>T  | Unverified | GTG | GGG | TAC | 2 | G | T |
| TCGA-24-1469 | CHRM2      | ENST00000320658 | p.R387S  | c.1161G>T | Verified   | ACC | AGG | ACA | 3 | G | T |
| TCGA-20-1687 | CHRNA3     | ENST00000326828 | p.W341C  | c.1023G>T | Unverified | TCA | TGG | GTG | 3 | G | T |
| TCGA-13-0887 | CILP       | ENST00000261883 | p.L74L   | c.222G>T  | Verified   | CGG | CTG | GAC | 3 | G | T |
| TCGA-29-1763 | CKAP4      | ENST00000378026 | p.S396S  | c.1188G>T | Unverified | CAC | TCG | GAA | 3 | G | T |
| TCGA-09-2049 | CLCN1      | ENST00000343257 | p.G222C  | c.664G>T  | Verified   | GCG | GGC | CTG | 1 | G | T |
| TCGA-13-0913 | CLCN5      | ENST00000376108 | p.L719F  | c.2157G>T | Verified   | cga | ttg | ctt | 3 | G | T |
| TCGA-13-0807 | CLDN10     | ENST00000376873 | p.R62L   | c.185G>T  | Verified   | TGC | CGA | CCG | 2 | G | T |
| TCGA-23-1029 | CLDN17     | ENST00000286808 | p.G120*  | c.358G>T  | Unverified | CTG | GGA | ACT | 1 | G | T |
| TCGA-24-1469 | CLDN7      | ENST00000360325 | p.V113V  | c.339G>T  | Verified   | AAA | GTG | AAG | 3 | G | T |
| TCGA-13-1497 | CLEC14A    | ENST00000342213 | p.G254V  | c.761G>T  | Verified   | GCT | GGC | AAA | 2 | G | T |
| TCGA-04-1343 | CLIP1      | ENST00000358808 | p.G816G  | c.2448G>T | Verified   | CAG | GGG | AGA | 3 | G | T |
| TCGA-24-1103 | CLPTM1     | ENST00000337392 | p.W136C  | c.408G>T  | Verified   | GAC | TGG | ACT | 3 | G | T |
| TCGA-23-1021 | CLTCL1     | ENST00000263200 | p.L1471L | c.4413G>T | Verified   | CTG | CTG | ACA | 3 | G | T |
| TCGA-23-1029 | CLVS1      | ENST00000325897 | p.D291Y  | c.871G>T  | Unverified | CCC | GAC | TAC | 1 | G | T |
| TCGA-13-0883 | CMYA5      | ENST00000238522 | p.E3089* | c.9265G>T | Verified   | GAA | GAA | ACT | 1 | G | T |
| TCGA-13-0761 | CNGA3      | ENST00000272602 | p.G634V  | c.1901G>T | Verified   | CTG | GGG | TCC | 2 | G | T |
| TCGA-13-0761 | CNGA3      | ENST00000272602 | p.G634V  | c.1901G>T | Verified   | CTG | GGG | TCC | 2 | G | T |
| TCGA-24-2280 | CNGB1      | ENST00000251102 | p.E521*  | c.1561G>T | Unverified | GAT | GAG | GCT | 1 | G | T |
| TCGA-13-0920 | CNNM4      | ENST00000377075 | p.G239V  | c.716G>T  | Verified   | AAG | GGC | AAC | 2 | G | T |
| TCGA-13-0923 | CNOT3      | ENST00000221232 | p.S358I  | c.1073G>T | Unverified | GCC | AGT | CCA | 2 | G | T |
| TCGA-61-1740 | CNTFR      | ENST00000351266 | p.L103L  | c.309G>T  | Unverified | CTG | CTG | CAT | 3 | G | T |

|              |         |                 |          |             |            |     |     |     |   |   |   |
|--------------|---------|-----------------|----------|-------------|------------|-----|-----|-----|---|---|---|
| TCGA-24-1563 | COBLL1  | ENST00000342193 | p.G437V  | c.1310G>T   | Verified   | CCT | GGG | ACA | 2 | G | T |
| TCGA-13-0893 | COL14A1 | ENST00000297848 | p.E581*  | c.1741G>T   | Verified   | ggt | gaa | gtc | 1 | G | T |
| TCGA-61-2008 | COL15A1 | ENST00000375001 | p.R1266M | c.3797G>T   | Verified   | GTG | AGG | AAA | 2 | G | T |
| TCGA-24-2267 | COL15A1 | ENST00000375001 | p.L1218L | c.3654G>T   | Verified   | GCT | CTG | CAT | 3 | G | T |
| TCGA-24-0979 | COL16A1 | ENST00000373672 | p.G1561V | c.4682G>T   | Verified   | CCT | GGC | ATC | 2 | G | T |
| TCGA-13-0916 | COL16A1 | ENST00000373672 | p.R201S  | c.603G>T    | Verified   | ATG | AGG | CCT | 3 | G | T |
| TCGA-13-1505 | COL22A1 | ENST00000303045 | p.G1045G | c.3135G>T   | Verified   | ATT | GGG | GTT | 3 | G | T |
| TCGA-13-1510 | COL23A1 | ENST00000390654 | p.?      | c.1494+1G>T | Unverified | GAG | AAG | GGA | 3 | G | T |
| TCGA-29-1691 | COL23A1 | ENST00000390654 | p.E302D  | c.906G>T    | Unverified | GGC | GAG | CAG | 3 | G | T |
| TCGA-13-1498 | COL24A1 | ENST00000370571 | p.G600C  | c.1798G>T   | Verified   | CCT | GGC | AGG | 1 | G | T |
| TCGA-23-1123 | COL27A1 | ENST00000356083 | p.C1731F | c.5192G>T   | Verified   | ACG | TGT | CTC | 2 | G | T |
| TCGA-23-1123 | COL27A1 | ENST00000356083 | p.C1731F | c.5192G>T   | Verified   | ACG | TGT | CTC | 2 | G | T |
| TCGA-23-1117 | COL4A4  | ENST00000396625 | p.G695C  | c.2083G>T   | Verified   | CAA | GGT | GCC | 1 | G | T |
| TCGA-23-1117 | COL4A4  | ENST00000396625 | p.G695C  | c.2083G>T   | Verified   | CAA | GGT | GCC | 1 | G | T |
| TCGA-30-1714 | COL4A4  | ENST00000396625 | p.D371Y  | c.1111G>T   | Unverified | GGG | GAC | CCA | 1 | G | T |
| TCGA-13-1497 | COL4A6  | ENST00000334504 | p.G1442* | c.4324G>T   | Unverified | CCA | GGA | TTT | 1 | G | T |
| TCGA-29-1702 | COL5A1  | ENST00000371817 | p.D1761Y | c.5281G>T   | Unverified | TAC | GAC | AAG | 1 | G | T |
| TCGA-24-2280 | COL5A3  | ENST00000264828 | p.G1190V | c.3569G>T   | Unverified | CCA | GGG | CTG | 2 | G | T |
| TCGA-61-1895 | COL6A3  | ENST00000295550 | p.G1842V | c.5525G>T   | Unverified | CTG | GGG | TTT | 2 | G | T |
| TCGA-04-1367 | COL6A3  | ENST00000295550 | p.Q788H  | c.2364G>T   | Verified   | GAG | CAG | ATT | 3 | G | T |
| TCGA-10-0930 | COL6A3  | ENST00000295550 | p.?      | c.5838+1G>T | Verified   | GTG | AAG | GTG | 3 | G | T |
| TCGA-10-0930 | COL6A3  | ENST00000295550 | p.?      | c.5838+1G>T | Verified   | GTG | AAG | GTG | 3 | G | T |
| TCGA-24-1469 | COL6A3  | ENST00000295550 | p.Q1479H | c.4437G>T   | Unverified | GTG | CAG | TTC | 3 | G | T |
| TCGA-24-2289 | COL9A1  | ENST00000357250 | p.G481V  | c.1442G>T   | Unverified | AAA | GGG | GAA | 2 | G | T |
| TCGA-29-1770 | COL9A2  | ENST00000372748 | p.P160P  | c.480G>T    | Unverified | CGC | CCG | GGA | 3 | G | T |
| TCGA-20-0990 | COQ5    | ENST00000288532 | p.G276*  | c.826G>T    | Verified   | GCT | GGA | GAC | 1 | G | T |
| TCGA-13-0913 | COX11   | ENST00000576370 | p.R6L    | c.17G>T     | Verified   | TGG | CGT | CCT | 2 | G | T |
| TCGA-24-1844 | CPA2    | ENST00000222481 | p.K294N  | c.882G>T    | Unverified | ATC | AAG | AGT | 3 | G | T |
| TCGA-24-0979 | CPAMD8  | ENST00000291440 | p.V513F  | c.1537G>T   | Verified   | CAG | GTT | GGG | 1 | G | T |
| TCGA-13-0904 | CPN2    | ENST00000323830 | p.G217C  | c.649G>T    | Verified   | CTG | GGC | AGC | 1 | G | T |
| TCGA-04-1331 | CPOX    | ENST00000264193 | p.G226V  | c.677G>T    | Unverified | AGA | GGA | AAA | 2 | G | T |
| TCGA-04-1331 | CPSF2   | ENST00000298875 | p.M443I  | c.1329G>T   | Verified   | ATG | ATG | AAA | 3 | G | T |
| TCGA-24-2280 | CPT1A   | ENST00000265641 | p.A478S  | c.1432G>T   | Unverified | GAT | GCG | CCG | 1 | G | T |
| TCGA-13-0760 | CPZ     | ENST00000360986 | p.V357L  | c.1069G>T   | Verified   | AAG | GTG | GCC | 1 | G | T |

|              |                     |                 |          |             |            |     |     |     |   |   |   |
|--------------|---------------------|-----------------|----------|-------------|------------|-----|-----|-----|---|---|---|
| TCGA-24-1844 | CR1                 | ENST00000400960 | p.V208L  | c.622G>T    | Unverified | CTT | GTG | GGT | 1 | G | T |
| TCGA-24-1844 | CR1_ENST00000367049 | ENST00000367049 | p.V208L  | c.622G>T    | Unverified | CTT | GTG | GGT | 1 | G | T |
| TCGA-09-2044 | CR2                 | ENST00000367057 | p.G99*   | c.295G>T    | Verified   | gga | gga | tac | 1 | G | T |
| TCGA-04-1347 | CRADD               | ENST00000332896 | p.V22V   | c.66G>T     | Verified   | ttg | gtg | gag | 3 | G | T |
| TCGA-10-0930 | CREB3L1             | ENST00000529193 | p.?      | c.1131+1G>T | Verified   | CTC | ATG | GTG | 3 | G | T |
| TCGA-10-0930 | CREB3L1             | ENST00000529193 | p.?      | c.1131+1G>T | Verified   | CTC | ATG | GTG | 3 | G | T |
| TCGA-29-1703 | CREBBP              | ENST00000262367 | p.?      | c.4280+1G>T | Unverified | ACG | AGG | CGT | 2 | G | T |
| TCGA-29-1699 | CREBBP              | ENST00000262367 | p.Q286H  | c.858G>T    | Unverified | GGG | CAG | CCA | 3 | G | T |
| TCGA-13-0760 | CREBZF              | ENST00000490820 | p.R222L  | c.665G>T    | Verified   | AAT | CGA | CTG | 2 | G | T |
| TCGA-23-1118 | CRTAC1              | ENST00000370597 | p.R436L  | c.1307G>T   | Verified   | TTC | CGG | GGC | 2 | G | T |
| TCGA-23-1122 | CRTC2               | ENST00000368633 | p.G626C  | c.1876G>T   | Unverified | CCA | GGT | TTC | 1 | G | T |
| TCGA-61-2094 | CSDE1               | ENST00000358528 | p.L656F  | c.1968G>T   | Unverified | caa | ttg | tgt | 3 | G | T |
| TCGA-09-2051 | CSE1L               | ENST00000262982 | p.V637F  | c.1909G>T   | Unverified | gct | gtt | gta | 1 | G | T |
| TCGA-24-1563 | CSF2RA              | ENST00000381529 | p.E311*  | c.931G>T    | Verified   | agt | gaa | gcc | 1 | G | T |
| TCGA-04-1338 | CSF2RB              | ENST00000403662 | p.A85S   | c.253G>T    | Unverified | TCA | GCC | TGC | 1 | G | T |
| TCGA-29-1691 | CSMD1_ENS           | ENST00000318252 | p.A2406S | c.7216G>T   | Unverified | TGC | GGT | TCC | 1 | G | T |
| TCGA-29-1691 | CSMD1_ENS           | ENST00000537824 | p.A2677S | c.8029G>T   | Unverified | CTG | GCT | GGC | 1 | G | T |
| TCGA-61-2109 | CSMD2               | ENST00000241312 | p.G2166V | c.6497G>T   | Unverified | CAT | GGC | ACC | 2 | G | T |
| TCGA-04-1361 | CSMD3               | ENST00000297405 | p.R2601L | c.7802G>T   | Verified   | ttc | cga | ctt | 2 | G | T |
| TCGA-04-1361 | CSMD3               | ENST00000297405 | p.R2601L | c.7802G>T   | Verified   | ttc | cga | ctt | 2 | G | T |
| TCGA-09-1674 | CSNK1D              | ENST00000314028 | p.R98S   | c.294G>T    | Unverified | TCC | AGG | AAA | 3 | G | T |
| TCGA-09-1674 | CSNK1D_EN           | ENST00000314028 | p.R98S   | c.294G>T    | Unverified | TCC | AGG | AAA | 3 | G | T |
| TCGA-09-1674 | CSNK1D_EN           | ENST00000392334 | p.R98S   | c.294G>T    | Unverified | TCC | AGG | AAA | 3 | G | T |
| TCGA-04-1652 | CSNK1E              | ENST00000359867 | p.R127R  | c.381G>T    | Unverified | cac | cgg | gac | 3 | G | T |
| TCGA-04-1652 | CSNK1E              | ENST00000359867 | p.R127R  | c.381G>T    | Unverified | cac | cgg | gac | 3 | G | T |
| TCGA-04-1652 | CSNK1E_EN           | ENST00000400206 | p.R127R  | c.381G>T    | Unverified | CAC | CGG | GAC | 3 | G | T |
| TCGA-04-1652 | CSNK1E_EN           | ENST00000400206 | p.R127R  | c.381G>T    | Unverified | CAC | CGG | GAC | 3 | G | T |
| TCGA-04-1652 | CSNK1E_EN           | ENST00000403904 | p.R127R  | c.381G>T    | Unverified | CAC | CGG | GAC | 3 | G | T |
| TCGA-04-1652 | CSNK1E_EN           | ENST00000403904 | p.R127R  | c.381G>T    | Unverified | CAC | CGG | GAC | 3 | G | T |
| TCGA-13-0920 | CSPP1               | ENST00000262210 | p.D288Y  | c.862G>T    | Verified   | CAA | GAT | CCT | 1 | G | T |
| TCGA-23-1022 | CSRP2               | ENST00000311083 | p.V190F  | c.568G>T    | Verified   | CTT | GTT | CAT | 1 | G | T |
| TCGA-61-1913 | CST9L               | ENST00000376979 | p.A67S   | c.199G>T    | Unverified | TAT | GCC | TAC | 1 | G | T |
| TCGA-61-1907 | CTAGE1              | ENST00000391403 | p.L672F  | c.2016G>T   | Unverified | TTA | TTG | TTT | 3 | G | T |
| TCGA-61-1907 | CTAGE1_EN           | ENST00000391403 | p.L672F  | c.2016G>T   | Unverified | TTA | TTG | TTT | 3 | G | T |

|              |            |                 |          |             |            |     |     |     |   |   |   |
|--------------|------------|-----------------|----------|-------------|------------|-----|-----|-----|---|---|---|
| TCGA-29-1775 | CTAGE4     | ENST00000486333 | p.G638V  | c.1913G>T   | Unverified | TCT | GGA | CCA | 2 | G | T |
| TCGA-29-1783 | CTDSP2     | ENST00000398073 | p.R101S  | c.303G>T    | Unverified | GGA | AGG | ATC | 3 | G | T |
| TCGA-29-1781 | CTGF       | ENST00000367976 | p.V303L  | c.907G>T    | Unverified | CCG | GTG | GAG | 1 | G | T |
| TCGA-29-1761 | CTR9       | ENST00000361367 | p.D924Y  | c.2770G>T   | Unverified | GAT | GAC | ACT | 1 | G | T |
| TCGA-24-1847 | CTSL1      | ENST00000343150 | p.A146S  | c.436G>T    | Unverified | GGT | GCT | CTT | 1 | G | T |
| TCGA-61-1910 | CTTNBP2    | ENST00000160373 | p.D1529Y | c.4585G>T   | Unverified | GCA | GAT | CTT | 1 | G | T |
| TCGA-61-2012 | CTTNBP2NL  | ENST00000271277 | p.R121L  | c.362G>T    | Verified   | CAG | CGG | CAT | 2 | G | T |
| TCGA-04-1347 | CUBN       | ENST00000377833 | p.T1841T | c.5523G>T   | Verified   | GGC | ACG | GGC | 3 | G | T |
| TCGA-23-1022 | CUL5       | ENST00000393094 | p.C188F  | c.563G>T    | Verified   | CTT | TGT | TCT | 2 | G | T |
| TCGA-04-1649 | CXCR3      | ENST00000373693 | p.E293*  | c.877G>T    | Unverified | cga | gaa | agc | 1 | G | T |
| TCGA-04-1649 | CXCR3_ENST | ENST00000373691 | p.E340*  | c.1018G>T   | Unverified | CGA | GAA | AGC | 1 | G | T |
| TCGA-29-1701 | CYLC2      | ENST00000374798 | p.G118V  | c.353G>T    | Unverified | AAA | GGT | GAA | 2 | G | T |
| TCGA-23-1122 | CYP11B1    | ENST00000292427 | p.L373F  | c.1119G>T   | Verified   | ACC | TTG | CGG | 3 | G | T |
| TCGA-29-1705 | CYP1A1     | ENST00000395048 | p.C20F   | c.59G>T     | Unverified | TTC | TGT | CTG | 2 | G | T |
| TCGA-29-1691 | CYP20A1    | ENST00000356079 | p.A8S    | c.22G>T     | Unverified | TTC | GCC | GTT | 1 | G | T |
| TCGA-29-2427 | CYP26B1    | ENST00000001146 | p.G98V   | c.293G>T    | Unverified | ACC | GGC | GCG | 2 | G | T |
| TCGA-04-1347 | CYP2C18    | ENST00000285979 | p.G79V   | c.236G>T    | Verified   | CAT | GGA | TAT | 2 | G | T |
| TCGA-13-1489 | CYP3A43    | ENST00000222382 | p.?      | c.1026+1G>T | Verified   | AAT | AAG | GCA | 3 | G | T |
| TCGA-13-0762 | CYP4A11    | ENST00000310638 | p.V185F  | c.553G>T    | Unverified | GAG | GTC | TTT | 1 | G | T |
| TCGA-13-0762 | CYP4A11    | ENST00000310638 | p.V185F  | c.553G>T    | Unverified | GAG | GTC | TTT | 1 | G | T |
| TCGA-61-1740 | CYP4B1     | ENST00000271153 | p.T38T   | c.114G>T    | Unverified | CAG | ACG | TTG | 3 | G | T |
| TCGA-23-1022 | CYP4F12    | ENST00000324632 | p.K177N  | c.531G>T    | Verified   | GAC | AAG | TGG | 3 | G | T |
| TCGA-30-1718 | CYSLTR1    | ENST00000373304 | p.V81F   | c.241G>T    | Unverified | gtg | gtc | tat | 1 | G | T |
| TCGA-61-1899 | CYTL1      | ENST00000307746 | p.E52*   | c.154G>T    | Unverified | TCG | GAG | CCA | 1 | G | T |
| TCGA-29-1770 | DAB1       | ENST00000371233 | p.D507Y  | c.1519G>T   | Unverified | GAT | GAC | ATC | 1 | G | T |
| TCGA-13-1496 | DAB1       | ENST00000371233 | p.S519I  | c.1556G>T   | Verified   | AAA | AGC | GAA | 2 | G | T |
| TCGA-13-1497 | DACH2      | ENST00000373125 | p.?      | c.1750+1G>T | Verified   | caa | gga | ggt | 1 | G | T |
| TCGA-13-1497 | DACH2_ENS  | ENST00000373131 | p.?      | c.1711+1G>T | Verified   | CAA | GCC | TGA | 1 | G | T |
| TCGA-24-1844 | DAG1       | ENST00000308775 | p.V277L  | c.829G>T    | Unverified | GGT | GTA | GAG | 1 | G | T |
| TCGA-20-1686 | DAP3       | ENST00000368336 | p.A184S  | c.550G>T    | Unverified | gag | gct | tca | 1 | G | T |
| TCGA-29-1699 | DAP3       | ENST00000368336 | p.E285*  | c.853G>T    | Unverified | ccc | gag | gaa | 1 | G | T |
| TCGA-61-1907 | DARS       | ENST00000264161 | p.R399I  | c.1196G>T   | Unverified | GTA | AGA | CCT | 2 | G | T |
| TCGA-13-1510 | DCAF12L2   | ENST00000538699 | p.V418L  | c.1252G>T   | Verified   | tgg | gtg | aac | 1 | G | T |
| TCGA-30-1891 | DCAF12L2   | ENST00000538699 | p.A62A   | c.186G>T    | Unverified | gga | gcg | cgg | 3 | G | T |

|              |                       |                 |          |             |            |     |     |     |   |   |   |
|--------------|-----------------------|-----------------|----------|-------------|------------|-----|-----|-----|---|---|---|
| TCGA-24-1103 | DCBLD1                | ENST00000296955 | p.G230G  | c.690G>T    | Verified   | GAA | GGG | ATT | 3 | G | T |
| TCGA-13-0885 | DCBLD2                | ENST00000326840 | p.R178L  | c.533G>T    | Verified   | GGA | CGC | GGA | 2 | G | T |
| TCGA-25-1318 | DCST2                 | ENST00000368424 | p.R487L  | c.1460G>T   | Unverified | CGG | CGT | TGT | 2 | G | T |
| TCGA-25-1318 | DCST2                 | ENST00000368424 | p.R487L  | c.1460G>T   | Unverified | CGG | CGT | TGT | 2 | G | T |
| TCGA-30-1857 | DCT                   | ENST00000377028 | p.G112C  | c.334G>T    | Unverified | TTT | GGC | TGG | 1 | G | T |
| TCGA-30-1857 | DCT_ENST00000446125   | ENST00000446125 | p.G112C  | c.334G>T    | Unverified | TTT | GGC | TGG | 1 | G | T |
| TCGA-23-1118 | DDA1                  | ENST00000359866 | p.L36L   | c.108G>T    | Verified   | TAC | CTG | CCT | 3 | G | T |
| TCGA-29-1777 | DDHD2                 | ENST00000397166 | p.R434I  | c.1301G>T   | Unverified | CCA | AGA | AAG | 2 | G | T |
| TCGA-13-1509 | DDX23                 | ENST00000308025 | p.S541I  | c.1622G>T   | Verified   | ctg | agc | cgc | 2 | G | T |
| TCGA-23-1031 | DDX47                 | ENST00000358007 | p.G128V  | c.383G>T    | Unverified | gta | ggt | gga | 2 | G | T |
| TCGA-10-0930 | DDX52                 | ENST00000349699 | p.A247S  | c.739G>T    | Verified   | ctt | gcc | agc | 1 | G | T |
| TCGA-10-0930 | DDX52                 | ENST00000349699 | p.A247S  | c.739G>T    | Verified   | ctt | gcc | agc | 1 | G | T |
| TCGA-24-1843 | DDX60L                | ENST00000260184 | p.V896F  | c.2686G>T   | Unverified | TTG | GTT | CTT | 1 | G | T |
| TCGA-29-1761 | DEFB129               | ENST00000246105 | p.A156S  | c.466G>T    | Unverified | TCT | GCC | ACT | 1 | G | T |
| TCGA-25-1318 | DENND5B               | ENST00000389082 | p.G1200W | c.3598G>T   | Verified   | ATT | GGG | AAG | 1 | G | T |
| TCGA-25-1318 | DENND5B               | ENST00000389082 | p.G1200W | c.3598G>T   | Verified   | ATT | GGG | AAG | 1 | G | T |
| TCGA-09-2049 | DEPTOR                | NM_022783.1     | p.?      | c.1102-1G>T | Verified   | aag | gtc | tgt | 1 | G | T |
| TCGA-24-1845 | DFFB                  | ENST00000378209 | p.E248D  | c.744G>T    | Unverified | AGG | GAG | AGC | 3 | G | T |
| TCGA-23-1123 | DGAT2L6               | ENST00000333026 | p.V184L  | c.550G>T    | Verified   | gtg | gtg | ggt | 1 | G | T |
| TCGA-23-1123 | DGAT2L6               | ENST00000333026 | p.V184L  | c.550G>T    | Verified   | gtg | gtg | ggt | 1 | G | T |
| TCGA-24-1469 | DGCR14                | ENST00000252137 | p.S147I  | c.440G>T    | Verified   | CCC | AGC | CTA | 2 | G | T |
| TCGA-04-1342 | DGCR2                 | ENST00000263196 | p.R492L  | c.1475G>T   | Unverified | CGG | CGC | CTG | 2 | G | T |
| TCGA-23-1021 | DGKA                  | ENST00000331886 | p.D283Y  | c.847G>T    | Verified   | tgc | gac | cgc | 1 | G | T |
| TCGA-09-1674 | DGKD                  | ENST00000264057 | p.R900L  | c.2699G>T   | Unverified | tgt | cgc | acg | 2 | G | T |
| TCGA-23-1122 | DGKE                  | ENST00000284061 | p.G61W   | c.181G>T    | Unverified | cac | ggg | tgg | 1 | G | T |
| TCGA-30-1857 | DGKI                  | ENST00000288490 | p.G1057V | c.3170G>T   | Unverified | ATT | GGC | CAT | 2 | G | T |
| TCGA-30-1857 | DGKI_ENST00000288490  | ENST00000288490 | p.G1057V | c.3170G>T   | Unverified | ATT | GGC | CAT | 2 | G | T |
| TCGA-25-1313 | DHX32                 | ENST00000284690 | p.G654C  | c.1960G>T   | Verified   | tct | ggt | tac | 1 | G | T |
| TCGA-04-1530 | DHX8                  | ENST00000262415 | p.E361*  | c.1081G>T   | Verified   | gag | gag | acc | 1 | G | T |
| TCGA-24-2289 | DIAPH2                | ENST00000324765 | p.G697W  | c.2089G>T   | Unverified | act | ggg | cct | 1 | G | T |
| TCGA-61-1904 | DIAPH2                | ENST00000324765 | p.A147S  | c.439G>T    | Unverified | act | gcc | aaa | 1 | G | T |
| TCGA-29-1691 | DISP2                 | ENST00000267889 | p.T489T  | c.1467G>T   | Unverified | GAC | ACG | GTG | 3 | G | T |
| TCGA-61-1910 | DKKL1_ENST00000221498 | ENST00000221498 | p.G96V   | c.287G>T    | Unverified | CTG | GGG | AAC | 2 | G | T |
| TCGA-25-2392 | DLG2                  | ENST00000398309 | p.V161F  | c.481G>T    | Verified   | GAG | GTT | TCC | 1 | G | T |



|              |           |                 |          |             |            |     |     |     |   |   |   |
|--------------|-----------|-----------------|----------|-------------|------------|-----|-----|-----|---|---|---|
| TCGA-23-1120 | DLG5      | ENST00000372391 | p.E508D  | c.1524G>T   | Verified   | CAG | GAG | CTG | 3 | G | T |
| TCGA-04-1652 | DLK2      | ENST00000357338 | p.L307F  | c.921G>T    | Unverified | AGC | TTG | GTG | 3 | G | T |
| TCGA-04-1652 | DLK2      | ENST00000357338 | p.L307F  | c.921G>T    | Unverified | AGC | TTG | GTG | 3 | G | T |
| TCGA-13-0913 | DLX6      | ENST00000007660 | p.Q152H  | c.456G>T    | Verified   | CTC | CAG | GCT | 3 | G | T |
| TCGA-13-0905 | DMBT1_ENS | ENST00000368915 | p.G2033V | c.6098G>T   | Verified   | CAT | GGT | GGC | 2 | G | T |
| TCGA-10-0930 | DMD_ENST  | ENST00000378677 | p.G1770* | c.5308G>T   | Verified   | ACT | GGA | AAG | 1 | G | T |
| TCGA-10-0930 | DMD_ENST  | ENST00000378677 | p.G1770* | c.5308G>T   | Verified   | ACT | GGA | AAG | 1 | G | T |
| TCGA-29-1696 | DMXL2     | ENST00000251076 | p.?      | c.1618-1G>T | Unverified | CAG | GTT | TCT | 1 | G | T |
| TCGA-29-1696 | DMXL2     | ENST00000251076 | p.?      | c.1618-1G>T | Unverified | CAG | GTT | TCT | 1 | G | T |
| TCGA-13-0923 | DNA2      | ENST00000399180 | p.G1077C | c.3229G>T   | Unverified | GTT | GGT | GAA | 1 | G | T |
| TCGA-13-0923 | DNA2L     | ENST00000358410 | p.G991C  | c.2971G>T   | Unverified | GTT | GGT | GAA | 1 | G | T |
| TCGA-23-1122 | DNAH1_ENS | ENST00000420323 | p.V1494F | c.4480G>T   | Verified   | ATC | GTC | ATT | 1 | G | T |
| TCGA-13-1497 | DNAH17    | ENST00000300671 | p.G1810V | c.5429G>T   | Verified   | CTG | GGC | AAC | 2 | G | T |
| TCGA-24-1463 | DNAH3     | ENST00000261383 | p.E3502* | c.10504G>T  | Verified   | ATC | GAA | GCC | 1 | G | T |
| TCGA-13-0904 | DNAH5     | ENST00000265104 | p.L3284L | c.9852G>T   | Verified   | AAA | CTG | GAA | 3 | G | T |
| TCGA-20-1687 | DNAH8     | NM_001371.1     | p.W1362L | c.4085G>T   | Unverified | cac | tgg | gat | 2 | G | T |
| TCGA-20-1687 | DNAH8_ENS | ENST00000359357 | p.W1362L | c.4085G>T   | Unverified | CAC | TGG | GAT | 2 | G | T |
| TCGA-13-0903 | DNAH9     | ENST00000262442 | p.D3868Y | c.11602G>T  | Verified   | CGA | GAT | TTT | 1 | G | T |
| TCGA-04-1649 | DNAH9     | ENST00000262442 | p.L2122L | c.6366G>T   | Unverified | GAT | CTG | AAG | 3 | G | T |
| TCGA-24-2288 | DNAJB4    | ENST00000370763 | p.V329L  | c.985G>T    | Unverified | gaa | gta | ctt | 1 | G | T |
| TCGA-13-1499 | DNAJC6    | ENST00000395325 | p.E379*  | c.1135G>T   | Verified   | tgg | gaa | cat | 1 | G | T |
| TCGA-24-1469 | DNM1L     | ENST00000549701 | p.M439I  | c.1317G>T   | Verified   | GAA | ATG | CAA | 3 | G | T |
| TCGA-23-2077 | DNMT3B    | ENST00000328111 | p.V719L  | c.2155G>T   | Verified   | cca | gtg | atg | 1 | G | T |
| TCGA-24-2267 | DNTT      | ENST00000371174 | p.A56S   | c.166G>T    | Verified   | CTG | GCC | CGC | 1 | G | T |
| TCGA-09-2044 | DNTTIP1   | ENST00000372622 | p.G160*  | c.478G>T    | Verified   | CGA | GGA | AGC | 1 | G | T |
| TCGA-24-1844 | DOCK2     | ENST00000256935 | p.A1538S | c.4612G>T   | Unverified | CCT | GCT | GTC | 1 | G | T |
| TCGA-04-1331 | DOCK5     | ENST00000276440 | p.M800I  | c.2400G>T   | Verified   | AAT | ATG | CTG | 3 | G | T |
| TCGA-24-1474 | DOLK      | ENST00000372586 | p.V369F  | c.1105G>T   | Unverified | GCG | GTC | TTC | 1 | G | T |
| TCGA-29-1768 | DPP8      | ENST00000300141 | p.E546*  | c.1636G>T   | Unverified | GGA | GAG | GTG | 1 | G | T |
| TCGA-29-1761 | DSC1      | ENST00000257197 | p.K624N  | c.1872G>T   | Unverified | GAA | AAG | GAT | 3 | G | T |
| TCGA-29-1761 | DSC1_ENST | ENST00000257198 | p.K624N  | c.1872G>T   | Unverified | GAA | AAG | GAT | 3 | G | T |
| TCGA-24-1616 | DSC3      | ENST00000360428 | p.?      | c.475-1G>T  | Verified   | CAA | GTT | GAA | 1 | G | T |
| TCGA-13-0886 | DSCAM     | ENST00000400454 | p.E873*  | c.2617G>T   | Verified   | GGG | GAG | GAC | 1 | G | T |
| TCGA-09-2056 | DSCAML1   | ENST00000321322 | p.R610L  | c.1829G>T   | Verified   | CAC | CGC | CAG | 2 | G | T |

|              |             |                 |         |              |            |     |     |     |   |   |   |
|--------------|-------------|-----------------|---------|--------------|------------|-----|-----|-----|---|---|---|
| TCGA-24-2280 | DSG1        | ENST00000257192 | p.V586F | c.1756G>T    | Unverified | CCT | GTT | CCC | 1 | G | T |
| TCGA-29-1698 | DSG4        | ENST00000308128 | p.R139S | c.417G>T     | Unverified | GAA | AGG | CCT | 3 | G | T |
| TCGA-29-1698 | DSG4_ENST0  | ENST00000359747 | p.R139S | c.417G>T     | Unverified | GAA | AGG | CCT | 3 | G | T |
| TCGA-13-1499 | DSN1        | ENST00000373750 | p.E130* | c.388G>T     | Verified   | GCA | GAA | AGC | 1 | G | T |
| TCGA-30-1714 | DST_ENST0C  | ENST00000244364 | p.?     | c.9072+1G>T  | Unverified | CAA | AAG | CTT | 3 | G | T |
| TCGA-13-0886 | DST_ENST0C  | ENST00000370754 | p.W338C | c.1014G>T    | Verified   | CTC | TGG | ACG | 3 | G | T |
| TCGA-13-0886 | DST_ENST0C  | ENST00000370769 | p.W160C | c.480G>T     | Verified   | CTC | TGG | ACG | 3 | G | T |
| TCGA-30-1714 | DST_ENST0C  | ENST00000370769 | p.?     | c.16314+1G>T | Unverified | CAA | AAG | CTT | 3 | G | T |
| TCGA-29-1763 | DTNA        | ENST00000399097 | p.R170I | c.509G>T     | Unverified | CTC | AGA | CAG | 2 | G | T |
| TCGA-29-1763 | DTNA_ENST0  | ENST00000269190 | p.R523I | c.1568G>T    | Unverified | CTC | AGA | CAG | 2 | G | T |
| TCGA-29-1763 | DTNA_ENST0  | ENST00000444659 | p.R522I | c.1565G>T    | Unverified | CTC | AGA | CAG | 2 | G | T |
| TCGA-13-0761 | DTNBP1      | ENST00000344537 | p.K26N  | c.78G>T      | Unverified | GAC | AAG | TCA | 3 | G | T |
| TCGA-13-0761 | DTNBP1      | ENST00000344537 | p.K26N  | c.78G>T      | Unverified | GAC | AAG | TCA | 3 | G | T |
| TCGA-04-1542 | DTX2        | ENST00000324432 | p.D118Y | c.352G>T     | Verified   | GAC | GAT | GGC | 1 | G | T |
| TCGA-30-1855 | DYNC111     | ENST00000324972 | p.A622S | c.1864G>T    | Unverified | TTT | GCC | AGG | 1 | G | T |
| TCGA-13-0807 | DYSF        | ENST00000258104 | p.W857L | c.2570G>T    | Verified   | CTG | TGG | TTT | 2 | G | T |
| TCGA-04-1337 | E2F2        | ENST00000361729 | p.L413L | c.1239G>T    | Verified   | tac | ctg | tgg | 3 | G | T |
| TCGA-61-1740 | EBAG9       | ENST00000395785 | p.E154* | c.460G>T     | Unverified | cag | gaa | aat | 1 | G | T |
| TCGA-04-1362 | EBF2        | ENST00000520164 | p.E82D  | c.246G>T     | Verified   | GTG | GAG | ATC | 3 | G | T |
| TCGA-13-1481 | EBF2        | ENST00000520164 | p.R332S | c.996G>T     | Verified   | GGA | AGG | TTC | 3 | G | T |
| TCGA-24-1463 | EEF1G       | ENST00000329251 | p.G4W   | c.10G>T      | Unverified | GCT | GGG | ACC | 1 | G | T |
| TCGA-09-2044 | EEFSEC      | ENST00000254730 | p.G301G | c.903G>T     | Verified   | CGC | GGG | TTG | 3 | G | T |
| TCGA-13-0887 | EFEMP1      | ENST00000394554 | p.D44Y  | c.130G>T     | Verified   | AAA | GAT | ATT | 1 | G | T |
| TCGA-61-1906 | EFEMP1      | ENST00000394554 | p.G100W | c.298G>T     | Unverified | ACC | GGG | GTT | 1 | G | T |
| TCGA-61-1906 | EFEMP1      | ENST00000394554 | p.G100W | c.298G>T     | Unverified | ACC | GGG | GTT | 1 | G | T |
| TCGA-13-1408 | EFEMP1      | ENST00000394554 | p.Q211H | c.633G>T     | Verified   | GAG | CAG | TGC | 3 | G | T |
| TCGA-24-1850 | EGFR        | ENST00000275493 | p.K261N | c.783G>T     | Unverified | TGC | AAG | GAC | 3 | G | T |
| TCGA-24-1850 | EGFR_ENST0  | ENST00000344576 | p.K261N | c.783G>T     | Unverified | TGC | AAG | GAC | 3 | G | T |
| TCGA-29-1693 | EGR2        | ENST00000242480 | p.V36L  | c.106G>T     | Unverified | TCG | GTG | ACC | 1 | G | T |
| TCGA-13-0904 | EHD2        | ENST00000263277 | p.E38*  | c.112G>T     | Unverified | GAG | GAG | CAC | 1 | G | T |
| TCGA-29-1691 | EHD2        | ENST00000263277 | p.A179S | c.535G>T     | Unverified | TTC | GCG | GAG | 1 | G | T |
| TCGA-29-1784 | EHMT2       | ENST00000375537 | p.E77D  | c.231G>T     | Unverified | GAT | GAG | GGG | 3 | G | T |
| TCGA-20-0990 | EIF2A_ENST0 | ENST00000487799 | p.C264F | c.791G>T     | Verified   | TTT | TGT | GCT | 2 | G | T |
| TCGA-13-0795 | EIF2C1      | ENST00000373204 | p.G443V | c.1328G>T    | Verified   | aat | ggg | att | 2 | G | T |

|              |            |                 |          |             |            |     |     |     |   |   |   |
|--------------|------------|-----------------|----------|-------------|------------|-----|-----|-----|---|---|---|
| TCGA-23-1022 | EIF4G1     | ENST00000319274 | p.R893R  | c.2679G>T   | Verified   | CGG | CGG | CGC | 3 | G | T |
| TCGA-29-1691 | EIF4G3     | ENST00000264211 | p.E879*  | c.2635G>T   | Unverified | CTG | GAA | GAA | 1 | G | T |
| TCGA-29-1691 | EIF4G3_ENS | ENST00000374937 | p.E885*  | c.2653G>T   | Unverified | CTG | GAA | GAA | 1 | G | T |
| TCGA-13-0906 | ELFN2      | ENST00000349653 | p.L311L  | c.933G>T    | Verified   | ACC | CTG | GTG | 3 | G | T |
| TCGA-09-2050 | ELK1       | ENST00000247161 | p.C99F   | c.296G>T    | Verified   | GAC | TGC | CCG | 2 | G | T |
| TCGA-25-2042 | ELMO3      | ENST00000393997 | p.L421L  | c.1263G>T   | Unverified | GCC | CTG | GAC | 3 | G | T |
| TCGA-09-2049 | ELN        | ENST00000252034 | p.A461S  | c.1381G>T   | Verified   | GCA | GCT | GCT | 1 | G | T |
| TCGA-23-1031 | ELOVL4     | ENST00000369816 | p.W169C  | c.507G>T    | Verified   | TTG | TGG | TGG | 3 | G | T |
| TCGA-25-2400 | EMID2      | ENST00000397927 | p.G350W  | c.1048G>T   | Verified   | AAG | GGG | GAA | 1 | G | T |
| TCGA-24-1604 | EML5       | ENST00000554922 | p.D957Y  | c.2869G>T   | Verified   | GAA | GAT | AAT | 1 | G | T |
| TCGA-13-0887 | EMR2       | ENST00000315576 | p.A656S  | c.1966G>T   | Verified   | CCA | GCT | GTG | 1 | G | T |
| TCGA-29-1761 | ENSG00000  | ENST00000329762 | p.V51V   | c.153G>T    | Unverified | GGT | GTG | GAT | 3 | G | T |
| TCGA-20-1683 | ENSG00000  | ENST00000402510 | p.R1164M | c.3491G>T   | Unverified | AAG | AGG | TCT | 2 | G | T |
| TCGA-23-1114 | ENSG00000  | ENST00000445286 | p.Q318H  | c.954G>T    | Unverified | TTC | AGG | CGC | 3 | G | T |
| TCGA-13-0760 | EOMES      | ENST00000295743 | p.E613*  | c.1837G>T   | Verified   | GAG | GAA | ATT | 1 | G | T |
| TCGA-04-1651 | EPB42      | ENST00000300215 | p.V308V  | c.924G>T    | Unverified | ACA | GTG | CTG | 3 | G | T |
| TCGA-04-1651 | EPB42      | ENST00000300215 | p.V308V  | c.924G>T    | Unverified | ACA | GTG | CTG | 3 | G | T |
| TCGA-13-0887 | EPC2       | ENST00000258484 | p.A599S  | c.1795G>T   | Verified   | CTT | GCC | CAG | 1 | G | T |
| TCGA-61-1998 | EPG5       | ENST00000282041 | p.?      | c.7226+1G>T | Verified   | CCA | AGC | TCC | 2 | G | T |
| TCGA-13-0923 | EPHA7      | NM_004440       | p.E482D  | c.1446G>T   | Verified   | tac | gag | aaa | 3 | G | T |
| TCGA-13-1408 | EPHA7      | NM_004440       | p.R676S  | c.2028G>T   | Unverified | caa | agg | aga | 3 | G | T |
| TCGA-24-0979 | EPS15L1    | ENST00000248070 | p.?      | c.1107+1G>T | Verified   | GGC | CCG | GAC | 3 | G | T |
| TCGA-61-2095 | ERBB3_ENS1 | ENST00000267101 | p.L49L   | c.147G>T    | Unverified | ACA | CTG | TAC | 3 | G | T |
| TCGA-61-2008 | ERCC6      | ENST00000355832 | p.?      | c.423-1G>T  | Unverified | CTC | ACG | TCA | 3 | G | T |
| TCGA-61-1914 | ERI1       | ENST00000250263 | p.K217N  | c.651G>T    | Unverified | TTG | AAG | GAA | 3 | G | T |
| TCGA-23-1031 | ESD        | ENST00000378720 | p.L48L   | c.144G>T    | Verified   | GCA | CTG | TAT | 3 | G | T |
| TCGA-29-1770 | ESR2       | ENST00000341099 | p.G218C  | c.652G>T    | Unverified | tgt | ggc | tcc | 1 | G | T |
| TCGA-29-1770 | ESR2_ENSTC | ENST00000554572 | p.G218C  | c.652G>T    | Unverified | TGT | GGC | TCC | 1 | G | T |
| TCGA-04-1338 | ESYT1      | ENST00000394048 | p.G79V   | c.236G>T    | Verified   | GTG | GGT | TTC | 2 | G | T |
| TCGA-29-1761 | ETS1       | ENST00000319397 | p.Q71H   | c.213G>T    | Unverified | cgg | cag | tgg | 3 | G | T |
| TCGA-29-1761 | ETS1_ENST0 | ENST00000392668 | p.Q115H  | c.345G>T    | Unverified | CGG | CAG | TGG | 3 | G | T |
| TCGA-23-1117 | ETS2       | ENST00000360214 | p.G356C  | c.1066G>T   | Verified   | GCC | GGC | TTC | 1 | G | T |
| TCGA-23-1117 | ETS2       | ENST00000360214 | p.G356C  | c.1066G>T   | Verified   | GCC | GGC | TTC | 1 | G | T |
| TCGA-04-1361 | EVC        | ENST00000264956 | p.R194R  | c.582G>T    | Verified   | CTC | CGG | GTG | 3 | G | T |

|              |            |                 |          |           |            |     |     |     |   |   |   |
|--------------|------------|-----------------|----------|-----------|------------|-----|-----|-----|---|---|---|
| TCGA-04-1361 | EVC        | ENST00000264956 | p.R194R  | c.582G>T  | Verified   | CTC | CGG | GTG | 3 | G | T |
| TCGA-13-1408 | EVC2       | ENST00000344408 | p.A786S  | c.2356G>T | Unverified | GCT | GCA | CGG | 1 | G | T |
| TCGA-29-1766 | EVI2A      | ENST00000247270 | p.R244I  | c.731G>T  | Unverified | GAA | AGA | AAA | 2 | G | T |
| TCGA-61-2095 | EVPL       | ENST00000301607 | p.Q1098H | c.3294G>T | Unverified | CTG | CAG | ATG | 3 | G | T |
| TCGA-13-0903 | EVX2       | ENST00000308618 | p.S156S  | c.468G>T  | Verified   | ACG | TCG | GCG | 3 | G | T |
| TCGA-04-1347 | EXOC2      | ENST00000230449 | p.A57S   | c.169G>T  | Verified   | tct | gca | agt | 1 | G | T |
| TCGA-24-2035 | EXOC2      | ENST00000230449 | p.Q462H  | c.1386G>T | Verified   | agc | cag | ctg | 3 | G | T |
| TCGA-23-1117 | EXOSC2     | ENST00000372358 | p.E232D  | c.696G>T  | Verified   | CGA | GAG | GTG | 3 | G | T |
| TCGA-23-1117 | EXOSC2     | ENST00000372358 | p.E232D  | c.696G>T  | Verified   | CGA | GAG | GTG | 3 | G | T |
| TCGA-13-0792 | EYA1       | ENST00000388742 | p.W430C  | c.1290G>T | Verified   | gac | tgg | atg | 3 | G | T |
| TCGA-13-1408 | F11R       | ENST00000289779 | p.G120W  | c.358G>T  | Verified   | TAT | GGG | GAG | 1 | G | T |
| TCGA-25-1318 | F13A1      | ENST00000264870 | p.G330V  | c.989G>T  | Verified   | CTT | GGA | ATA | 2 | G | T |
| TCGA-25-1318 | F13A1      | ENST00000264870 | p.G330V  | c.989G>T  | Verified   | CTT | GGA | ATA | 2 | G | T |
| TCGA-61-1914 | F5         | ENST00000367797 | p.D843Y  | c.2527G>T | Unverified | CCA | GAT | GTC | 1 | G | T |
| TCGA-24-1103 | F8         | ENST00000360256 | p.L1862L | c.5586G>T | Verified   | GAC | CTG | GAA | 3 | G | T |
| TCGA-24-1103 | F8_ENST000 | ENST00000360256 | p.L1862L | c.5586G>T | Verified   | GAC | CTG | GAA | 3 | G | T |
| TCGA-61-1914 | FAM102A    | ENST00000373095 | p.G148*  | c.442G>T  | Unverified | TCT | GGA | GAT | 1 | G | T |
| TCGA-09-2049 | FAM105B    | ENST00000284274 | p.R121R  | c.363G>T  | Verified   | ATA | CGG | CGA | 3 | G | T |
| TCGA-13-1512 | FAM117A    | ENST00000240364 | p.G291V  | c.872G>T  | Verified   | CGG | GGT | GCC | 2 | G | T |
| TCGA-04-1367 | FAM123A    | ENST00000357816 | p.G24V   | c.71G>T   | Unverified | GTG | GGG | GTC | 2 | G | T |
| TCGA-13-0893 | FAM126B    | ENST00000418596 | p.A347S  | c.1039G>T | Verified   | GAT | GCA | GAT | 1 | G | T |
| TCGA-24-1422 | FAM135B    | ENST00000395297 | p.V12L   | c.34G>T   | Verified   | TCG | GTA | GAG | 1 | G | T |
| TCGA-04-1338 | FAM171A1   | ENST00000378116 | p.E158*  | c.472G>T  | Verified   | CCT | GAG | AAC | 1 | G | T |
| TCGA-13-0920 | FAM171B    | ENST00000304698 | p.G766*  | c.2296G>T | Verified   | GAT | GGA | GGG | 1 | G | T |
| TCGA-13-0893 | FAM183A    | ENST00000335282 | p.K81N   | c.243G>T  | Verified   | AAG | AAG | TAC | 3 | G | T |
| TCGA-13-1488 | FAM204A    | ENST00000369183 | p.E168*  | c.502G>T  | Verified   | ATT | GAG | AAG | 1 | G | T |
| TCGA-04-1361 | FAM20B     | ENST00000263733 | p.G269V  | c.806G>T  | Verified   | TCT | GGC | CCG | 2 | G | T |
| TCGA-04-1361 | FAM20B     | ENST00000263733 | p.G269V  | c.806G>T  | Verified   | TCT | GGC | CCG | 2 | G | T |
| TCGA-24-1844 | FAM26F     | ENST00000368605 | p.V297L  | c.889G>T  | Unverified | ACG | GTG | ATT | 1 | G | T |
| TCGA-29-1769 | FAM35A     | ENST00000358313 | p.C317F  | c.950G>T  | Unverified | GTT | TGT | CCT | 2 | G | T |
| TCGA-13-1498 | FAM53C     | ENST00000239906 | p.V364V  | c.1092G>T | Verified   | GCT | GTG | CGG | 3 | G | T |
| TCGA-13-1510 | FAM69C     | ENST00000400291 | p.K120N  | c.360G>T  | Unverified | GAG | AAG | TAG | 3 | G | T |
| TCGA-24-2280 | FAM75D4    | ENST00000344803 | p.V642V  | c.1926G>T | Unverified | TCT | GTG | GTT | 3 | G | T |
| TCGA-29-1784 | FAM83B     | ENST00000306858 | p.R459S  | c.1377G>T | Unverified | GAC | AGG | AAT | 3 | G | T |

|              |            |                     |          |           |            |     |     |     |   |   |   |
|--------------|------------|---------------------|----------|-----------|------------|-----|-----|-----|---|---|---|
| TCGA-24-1103 | FAM83D     | ENST00000217429     | p.K506N  | c.1518G>T | Verified   | TTG | AAG | TCT | 3 | G | T |
| TCGA-24-2280 | FAM92B     | ENST00000539556     | p.L163L  | c.489G>T  | Unverified | CAG | CTG | GAG | 3 | G | T |
| TCGA-13-1499 | FANCC_ENS  | ENST00000289081     | p.C96F   | c.287G>T  | Verified   | TGT | TGT | CTA | 2 | G | T |
| TCGA-23-1123 | FANCD2     | ENST00000287647     | p.E650*  | c.1948G>T | Verified   | ctg | gaa | tgg | 1 | G | T |
| TCGA-23-1123 | FANCD2     | ENST00000287647     | p.E650*  | c.1948G>T | Verified   | ctg | gaa | tgg | 1 | G | T |
| TCGA-24-2024 | FANCM      | ENST00000267430     | p.R1666I | c.4997G>T | Verified   | TCC | AGA | ATT | 2 | G | T |
| TCGA-30-1891 | FARSA      | ENST00000314606     | p.V430L  | c.1288G>T | Unverified | TGG | GTG | GAG | 1 | G | T |
| TCGA-13-0886 | FAT1       | ENST00000441802     | p.V2267L | c.6799G>T | Unverified | GAA | GTA | TTT | 1 | G | T |
| TCGA-23-1022 | FAT3_ENSTC | ENST00000298047_v61 | p.K224N  | c.672G>T  | Verified   | GAA | AAG | AAT | 3 | G | T |
| TCGA-24-2280 | FAT3_ENSTC | ENST00000298047_v61 | p.Q1253H | c.3759G>T | Verified   | CCC | CAG | TTC | 3 | G | T |
| TCGA-30-1718 | FAT3_ENSTC | ENST00000298047_v61 | p.K2803N | c.8409G>T | Unverified | ATC | AAG | GTA | 3 | G | T |
| TCGA-23-1022 | FAT3_ENSTC | ENST00000409404     | p.K224N  | c.672G>T  | Verified   | GAA | AAG | AAT | 3 | G | T |
| TCGA-24-2280 | FAT3_ENSTC | ENST00000409404     | p.Q1253H | c.3759G>T | Verified   | CCC | CAG | TTC | 3 | G | T |
| TCGA-30-1718 | FAT3_ENSTC | ENST00000409404     | p.K2803N | c.8409G>T | Unverified | ATC | AAG | GTA | 3 | G | T |
| TCGA-13-1512 | FBL        | ENST00000221801     | p.G47V   | c.140G>T  | Verified   | GGA | GGA | GGT | 2 | G | T |
| TCGA-23-1118 | FBRS       | ENST00000287468     | p.G381C  | c.1141G>T | Verified   | GCG | GGT | GAG | 1 | G | T |
| TCGA-25-2398 | FBXO15     | ENST00000269500     | p.L403L  | c.1209G>T | Verified   | gag | ctg | gtg | 3 | G | T |
| TCGA-04-1362 | FBXO40     | ENST00000338040     | p.E407*  | c.1219G>T | Verified   | AGA | GAA | CTC | 1 | G | T |
| TCGA-24-0979 | FBXO42     | ENST00000375592     | p.A565S  | c.1693G>T | Unverified | aaa | gcg | atg | 1 | G | T |
| TCGA-09-1674 | FBXO7      | ENST00000266087     | p.D136Y  | c.406G>T  | Unverified | AAT | GAC | GAC | 1 | G | T |
| TCGA-09-1674 | FBXO7_ENS  | ENST00000266087     | p.D136Y  | c.406G>T  | Unverified | AAT | GAC | GAC | 1 | G | T |
| TCGA-09-1674 | FBXO7_ENS  | ENST00000382058     | p.D57Y   | c.169G>T  | Unverified | AAT | GAC | GAC | 1 | G | T |
| TCGA-25-2392 | FBXW8      | ENST00000309909     | p.S470S  | c.1410G>T | Verified   | ctg | tcg | ctc | 3 | G | T |
| TCGA-29-1691 | FCAMR      | ENST00000400962     | p.G253*  | c.757G>T  | Unverified | TCT | GGA | GAA | 1 | G | T |
| TCGA-29-1691 | FCAMR_ENS  | ENST00000324852     | p.W520L  | c.1559G>T | Unverified | CTC | TGG | AGA | 2 | G | T |
| TCGA-09-1665 | FCF1       | ENST00000341162     | p.R167I  | c.500G>T  | Verified   | AGA | AGA | ATC | 2 | G | T |
| TCGA-09-2044 | FCHO2      | ENST00000430046     | p.S508I  | c.1523G>T | Verified   | GAA | AGT | TCT | 2 | G | T |
| TCGA-24-1417 | FCRL4      | ENST00000271532     | p.G171V  | c.512G>T  | Verified   | TAT | GGA | GAC | 2 | G | T |
| TCGA-04-1367 | FER1L6     | ENST00000399018     | p.D1559Y | c.4675G>T | Verified   | AAG | GAT | AAG | 1 | G | T |
| TCGA-24-2289 | FERMT2     | ENST00000395631     | p.A542S  | c.1624G>T | Unverified | GAG | GCC | CAT | 1 | G | T |
| TCGA-13-1507 | FGB        | ENST00000302068     | p.D419Y  | c.1255G>T | Verified   | TCA | GAT | CCC | 1 | G | T |
| TCGA-20-1685 | FGB        | ENST00000302068     | p.W279L  | c.836G>T  | Unverified | GGA | TGG | ACA | 2 | G | T |
| TCGA-04-1331 | FGD1       | ENST00000375135     | p.A818S  | c.2452G>T | Verified   | gtg | gct | gca | 1 | G | T |
| TCGA-09-2051 | FGD6       | ENST00000343958     | p.C256F  | c.767G>T  | Unverified | ACT | TGC | CAG | 2 | G | T |

|              |            |                 |          |            |            |     |     |     |   |   |   |
|--------------|------------|-----------------|----------|------------|------------|-----|-----|-----|---|---|---|
| TCGA-24-1604 | FGF6       | ENST00000228837 | p.S76I   | c.227G>T   | Verified   | GAA | AGT | GGC | 2 | G | T |
| TCGA-23-1123 | FIGNL1     | ENST00000395556 | p.D71Y   | c.211G>T   | Verified   | ATT | GAT | TCT | 1 | G | T |
| TCGA-23-1123 | FIGNL1     | ENST00000395556 | p.D71Y   | c.211G>T   | Verified   | ATT | GAT | TCT | 1 | G | T |
| TCGA-61-2009 | FLG        | ENST00000368799 | p.D3492Y | c.10474G>T | Verified   | AAT | GAC | GAA | 1 | G | T |
| TCGA-24-1844 | FLG        | ENST00000368799 | p.R1203S | c.3609G>T  | Unverified | GGA | AGG | TCT | 3 | G | T |
| TCGA-24-0979 | FLG2       | ENST00000388718 | p.G1065V | c.3194G>T  | Verified   | TTT | GGA | CAA | 2 | G | T |
| TCGA-13-1510 | FLJ20273   | ENST00000381795 | p.G43C   | c.127G>T   | Unverified | ACG | GGC | TAC | 1 | G | T |
| TCGA-23-1117 | FLJ90650   | ENST00000357872 | p.A341S  | c.1021G>T  | Verified   | AGT | GCA | GAC | 1 | G | T |
| TCGA-23-1117 | FLJ90650   | ENST00000357872 | p.A341S  | c.1021G>T  | Verified   | AGT | GCA | GAC | 1 | G | T |
| TCGA-29-1698 | FLNB       | ENST00000295956 | p.R73L   | c.218G>T   | Unverified | TTT | CGC | CAG | 2 | G | T |
| TCGA-29-1698 | FLNB_ENSTC | ENST00000490882 | p.R73L   | c.218G>T   | Unverified | TTT | CGC | CAG | 2 | G | T |
| TCGA-23-1117 | FLNC       | ENST00000325888 | p.V1054L | c.3160G>T  | Verified   | GCT | GTG | GAG | 1 | G | T |
| TCGA-23-1117 | FLNC       | ENST00000325888 | p.V1054L | c.3160G>T  | Verified   | GCT | GTG | GAG | 1 | G | T |
| TCGA-13-0795 | FMR1       | ENST00000370475 | p.?      | c.270+1G>T | Verified   | ggt | gag | ttt | 3 | G | T |
| TCGA-25-1326 | FNDC1      | ENST00000297267 | p.R830M  | c.2489G>T  | Verified   | GGG | AGG | TCT | 2 | G | T |
| TCGA-61-1899 | FNDC9      | ENST00000312349 | p.A118S  | c.352G>T   | Unverified | ATG | GCC | ATT | 1 | G | T |
| TCGA-13-0903 | FOXA2      | ENST00000377115 | p.Q173H  | c.519G>T   | Verified   | atc | cag | cag | 3 | G | T |
| TCGA-13-0916 | FOXJ3      | ENST00000372573 | p.A153S  | c.457G>T   | Verified   | tgg | gca | ata | 1 | G | T |
| TCGA-25-1313 | FPR3       | ENST00000339223 | p.S168I  | c.503G>T   | Unverified | ATA | AGT | ACT | 2 | G | T |
| TCGA-04-1347 | FREM1      | ENST00000422223 | p.W418C  | c.1254G>T  | Verified   | TCC | TGG | AAT | 3 | G | T |
| TCGA-13-0916 | FRMD4A     | ENST00000357447 | p.D152Y  | c.454G>T   | Verified   | GGA | GAT | TTT | 1 | G | T |
| TCGA-13-0793 | FRMD4B     | ENST00000264546 | p.G202V  | c.605G>T   | Verified   | TAC | GGT | GTC | 2 | G | T |
| TCGA-09-2049 | FRY        | ENST00000380250 | p.G1989C | c.5965G>T  | Verified   | TTT | GGT | GTC | 1 | G | T |
| TCGA-13-0916 | FRY        | ENST00000380250 | p.D2489Y | c.7465G>T  | Verified   | CTG | GAC | AGC | 1 | G | T |
| TCGA-24-1844 | FSCN3      | ENST00000265825 | p.E231*  | c.691G>T   | Unverified | GGA | GAA | GGA | 1 | G | T |
| TCGA-13-0792 | FSIP1      | ENST00000350221 | p.E455*  | c.1363G>T  | Verified   | AAT | GAA | TCA | 1 | G | T |
| TCGA-09-1665 | FTSJ3      | ENST00000582115 | p.D50Y   | c.148G>T   | Verified   | CTG | GAC | CTG | 1 | G | T |
| TCGA-25-1318 | FUK        | ENST00000288078 | p.R35R   | c.105G>T   | Verified   | AAG | CGG | GAG | 3 | G | T |
| TCGA-25-1318 | FUK        | ENST00000288078 | p.R35R   | c.105G>T   | Verified   | AAG | CGG | GAG | 3 | G | T |
| TCGA-24-2267 | G6PD       | ENST00000291567 | p.R393L  | c.1178G>T  | Verified   | ATC | CGC | GTG | 2 | G | T |
| TCGA-29-1762 | GAD2       | ENST00000259271 | p.G413*  | c.1237G>T  | Unverified | GAG | GGA | TTG | 1 | G | T |
| TCGA-61-2109 | GAD2       | ENST00000259271 | p.G383V  | c.1148G>T  | Unverified | AGT | GGC | GTG | 2 | G | T |
| TCGA-29-1693 | GAL3ST1    | ENST00000338911 | p.G291W  | c.871G>T   | Unverified | TCG | GGG | GAG | 1 | G | T |
| TCGA-29-1703 | GALNT13    | ENST00000392825 | p.V135F  | c.403G>T   | Unverified | ACT | GTT | TAC | 1 | G | T |

|              |        |                 |          |            |            |     |     |     |   |   |   |
|--------------|--------|-----------------|----------|------------|------------|-----|-----|-----|---|---|---|
| TCGA-24-2267 | GARS   | ENST00000389266 | p.L375F  | c.1125G>T  | Verified   | TAT | TTG | TAT | 3 | G | T |
| TCGA-09-2051 | GCA    | ENST00000437150 | p.G37*   | c.109G>T   | Unverified | GAT | GGA | TAC | 1 | G | T |
| TCGA-61-1998 | GCC1   | ENST00000321407 | p.A610S  | c.1828G>T  | Verified   | GTG | GCC | TTG | 1 | G | T |
| TCGA-24-0975 | GCM1   | ENST00000259803 | p.?      | c.441+1G>T | Unverified | TTC | CAG | TCA | 3 | G | T |
| TCGA-29-1761 | GCNT4  | ENST00000322348 | p.W220L  | c.659G>T   | Unverified | CAG | TGG | AAA | 2 | G | T |
| TCGA-13-1501 | GCNT4  | ENST00000322348 | p.R399S  | c.1197G>T  | Verified   | TTA | AGG | TGG | 3 | G | T |
| TCGA-13-1501 | GCNT4  | ENST00000322348 | p.R399S  | c.1197G>T  | Verified   | TTA | AGG | TGG | 3 | G | T |
| TCGA-24-1604 | GEMIN7 | ENST00000391951 | p.A47S   | c.139G>T   | Verified   | ATA | GCT | CAA | 1 | G | T |
| TCGA-61-2008 | GFOD2  | ENST00000268797 | p.V7V    | c.21G>T    | Verified   | GGA | GTG | GGC | 3 | G | T |
| TCGA-13-0755 | GFRA1  | ENST00000369236 | p.R221L  | c.662G>T   | Verified   | AGG | CGA | CAG | 2 | G | T |
| TCGA-09-2049 | GFRAL  | ENST00000340465 | p.G124V  | c.371G>T   | Verified   | CAT | GGA | TTC | 2 | G | T |
| TCGA-29-1698 | GGA3   | ENST00000245541 | p.L102L  | c.306G>T   | Unverified | TAC | CTG | GGG | 3 | G | T |
| TCGA-04-1347 | GGT5   | ENST00000327365 | p.G585V  | c.1754G>T  | Verified   | GCA | GGC | TAC | 2 | G | T |
| TCGA-23-1809 | GGTLC2 | ENST00000215938 | p.R149L  | c.446G>T   | Unverified | GGC | CGT | GCC | 2 | G | T |
| TCGA-04-1338 | GHRL   | ENST00000335542 | p.G88V   | c.263G>T   | Verified   | TCA | GGG | GTT | 2 | G | T |
| TCGA-23-1117 | GIOT-1 | ENST00000396893 | p.R240M  | c.719G>T   | Verified   | TTT | AGG | CAT | 2 | G | T |
| TCGA-23-1117 | GIOT-1 | ENST00000396893 | p.R240M  | c.719G>T   | Verified   | TTT | AGG | CAT | 2 | G | T |
| TCGA-29-1781 | GJA8   | ENST00000369235 | p.W78C   | c.234G>T   | Unverified | CTC | TGG | GTG | 3 | G | T |
| TCGA-24-1469 | GJB4   | ENST00000339480 | p.G242V  | c.725G>T   | Verified   | CAG | GGA | GGG | 2 | G | T |
| TCGA-29-1781 | GJB5   | ENST00000338513 | p.M93I   | c.279G>T   | Unverified | GTC | ATG | CAC | 3 | G | T |
| TCGA-24-2267 | GK2    | ENST00000358842 | p.C283F  | c.848G>T   | Verified   | GGT | TGC | TTC | 2 | G | T |
| TCGA-61-2102 | GLI2   | ENST00000361492 | p.A325S  | c.973G>T   | Verified   | CTG | GCC | CAG | 1 | G | T |
| TCGA-20-0991 | GLI2   | ENST00000361492 | p.S1482I | c.4445G>T  | Verified   | GAC | AGC | ATC | 2 | G | T |
| TCGA-13-0795 | GLIPR1 | ENST00000266659 | p.G161V  | c.482G>T   | Verified   | TCT | GGC | TTT | 2 | G | T |
| TCGA-09-2050 | GLO1   | ENST00000373365 | p.G10C   | c.28G>T    | Unverified | GGC | GGC | CTC | 1 | G | T |
| TCGA-09-2049 | GLRA1  | ENST00000274576 | p.A203S  | c.607G>T   | Verified   | GGA | GCC | GTG | 1 | G | T |
| TCGA-29-1777 | GLUD1  | ENST00000277865 | p.P43P   | c.129G>T   | Unverified | CAG | CCG | GGG | 3 | G | T |
| TCGA-61-1740 | GMPS   | ENST00000496455 | p.G142C  | c.424G>T   | Unverified | agg | ggc | ctt | 1 | G | T |
| TCGA-29-1702 | GNAI3  | ENST00000369851 | p.Q164H  | c.492G>T   | Unverified | tcc | cag | tct | 3 | G | T |
| TCGA-29-1761 | GNAL   | ENST00000334049 | p.V181F  | c.541G>T   | Unverified | CCA | GTT | CCG | 1 | G | T |
| TCGA-13-1497 | GNPAT  | ENST00000366647 | p.V510F  | c.1528G>T  | Verified   | GAT | GTC | TAC | 1 | G | T |
| TCGA-23-1809 | GNPAT  | ENST00000366647 | p.E290*  | c.868G>T   | Unverified | GAA | GAA | ACT | 1 | G | T |
| TCGA-61-1725 | GNPTG  | ENST00000204679 | p.L259L  | c.777G>T   | Unverified | AGG | CTG | AAA | 3 | G | T |
| TCGA-13-0923 | GOLGB1 | ENST00000340645 | p.E2564* | c.7690G>T  | Verified   | AAG | GAG | CTG | 1 | G | T |

|              |            |                     |          |           |            |     |     |     |   |   |   |
|--------------|------------|---------------------|----------|-----------|------------|-----|-----|-----|---|---|---|
| TCGA-24-1847 | GOLGB1     | ENST00000340645     | p.G1301V | c.3902G>T | Unverified | GGC | GGA | ACT | 2 | G | T |
| TCGA-23-1122 | GPAM       | ENST00000348367     | p.G154V  | c.461G>T  | Verified   | GAT | GGT | TCT | 2 | G | T |
| TCGA-25-2391 | GPR124     | ENST00000412232     | p.G98G   | c.294G>T  | Unverified | ACG | GGG | CTC | 3 | G | T |
| TCGA-29-1777 | GPR126     | ENST00000296932     | p.D709Y  | c.2125G>T | Unverified | GAA | GAT | TCT | 1 | G | T |
| TCGA-29-1777 | GPR126_EN  | ENST00000367609     | p.D737Y  | c.2209G>T | Unverified | GAA | GAT | TCT | 1 | G | T |
| TCGA-24-2289 | GPR137C    | ENST00000321662     | p.G313V  | c.938G>T  | Unverified | AGT | GGA | GAA | 2 | G | T |
| TCGA-23-1118 | GPR139     | ENST00000570682     | p.A296S  | c.886G>T  | Verified   | ATG | GCA | GCC | 1 | G | T |
| TCGA-13-1510 | GPR149     | ENST00000389740     | p.G50C   | c.148G>T  | Unverified | GTG | GGC | AGC | 1 | G | T |
| TCGA-25-2042 | GPR50      | NM_004224.1         | p.G167C  | c.499G>T  | Verified   | att | ggc | acc | 1 | G | T |
| TCGA-13-1507 | GPR77      | ENST00000257267     | p.R300L  | c.899G>T  | Verified   | CTC | CGC | CGG | 2 | G | T |
| TCGA-04-1362 | GPR78      | ENST00000382487     | p.K242N  | c.726G>T  | Verified   | AGG | AAG | ATT | 3 | G | T |
| TCGA-61-2095 | GPRC5D     | ENST00000228887     | p.R49L   | c.146G>T  | Unverified | ATG | CGA | AAG | 2 | G | T |
| TCGA-61-2102 | GPRIN1     | ENST00000303991     | p.G549C  | c.1645G>T | Verified   | GTG | GGC | AAG | 1 | G | T |
| TCGA-13-0884 | GPX6       | ENST00000361902     | p.G105*  | c.313G>T  | Verified   | TTT | GGA | AAA | 1 | G | T |
| TCGA-13-0885 | GRB14      | ENST00000263915     | p.G497C  | c.1489G>T | Verified   | GAC | GGT | GAA | 1 | G | T |
| TCGA-24-1845 | GRIA3      | NM_000828.2         | p.D484Y  | c.1450G>T | Unverified | agg | gat | cca | 1 | G | T |
| TCGA-24-1845 | GRIA3_ENST | ENST00000264357     | p.D484Y  | c.1450G>T | Unverified | AGG | GAT | CCA | 1 | G | T |
| TCGA-24-1845 | GRIA3_ENST | ENST00000371256     | p.D484Y  | c.1450G>T | Unverified | AGG | GAT | CCA | 1 | G | T |
| TCGA-23-1122 | GRID2      | ENST00000282020     | p.R297R  | c.891G>T  | Verified   | CAG | CGG | TGT | 3 | G | T |
| TCGA-23-1120 | GRIN3A     | ENST00000361820     | p.W907C  | c.2721G>T | Verified   | AAG | TGG | TAC | 3 | G | T |
| TCGA-13-0904 | GRK1       | NM_002929.2         | p.K40N   | c.120G>T  | Verified   | ctc | aag | ctg | 3 | G | T |
| TCGA-23-1123 | GRLF1_ENST | ENST00000317082_v61 | p.S752I  | c.2255G>T | Verified   | ATC | AGT | CAA | 2 | G | T |
| TCGA-23-1123 | GRLF1_ENST | ENST00000317082_v61 | p.S752I  | c.2255G>T | Verified   | ATC | AGT | CAA | 2 | G | T |
| TCGA-13-0883 | GRM1       | ENST00000282753     | p.W224C  | c.672G>T  | Verified   | AAT | TGG | ACC | 3 | G | T |
| TCGA-25-2400 | GRM1       | ENST00000282753     | p.R78S   | c.234G>T  | Unverified | CAG | AGG | GTG | 3 | G | T |
| TCGA-13-0885 | GRM4       | ENST00000374181     | p.V824F  | c.2470G>T | Verified   | ACG | GTC | TCG | 1 | G | T |
| TCGA-13-0885 | GRM4_ENST  | ENST00000374177     | p.V708F  | c.2122G>T | Verified   | ACG | GTC | TCG | 1 | G | T |
| TCGA-13-0884 | GSPT1      | NM_002094.1         | p.P66P   | c.198G>T  | Verified   | gca | ccg | cca | 3 | G | T |
| TCGA-24-2267 | GSTP1      | ENST00000398606     | p.L161L  | c.483G>T  | Verified   | CTG | CTG | ATC | 3 | G | T |
| TCGA-61-2008 | GTF2H4     | ENST00000259895     | p.V343V  | c.1029G>T | Verified   | GTG | GTG | GCG | 3 | G | T |
| TCGA-13-0905 | GYLTL1B    | ENST00000325468     | p.A448S  | c.1342G>T | Verified   | GAA | GCC | CTG | 1 | G | T |
| TCGA-24-1616 | HAS2       | ENST00000303924     | p.G491C  | c.1471G>T | Verified   | GGT | GGT | GTG | 1 | G | T |
| TCGA-13-0887 | HAS2       | ENST00000303924     | p.G139V  | c.416G>T  | Verified   | ATG | GGC | AGA | 2 | G | T |
| TCGA-29-1768 | HAUS3      | ENST00000243706     | p.L40L   | c.120G>T  | Unverified | TTT | CTG | AAG | 3 | G | T |



|              |            |                 |          |            |            |     |     |     |   |   |   |
|--------------|------------|-----------------|----------|------------|------------|-----|-----|-----|---|---|---|
| TCGA-13-0885 | HCRTR1     | ENST00000373706 | p.V106L  | c.316G>T   | Verified   | CTG | GTG | GAC | 1 | G | T |
| TCGA-13-0903 | HDAC3      | ENST00000305264 | p.?      | c.420+1G>T | Verified   | TTT | GAG | GCC | 3 | G | T |
| TCGA-24-1470 | HEATR3     | ENST00000299192 | p.Q212H  | c.636G>T   | Verified   | TTG | CAG | ACA | 3 | G | T |
| TCGA-61-1998 | HEATR6     | ENST00000184956 | p.C232F  | c.695G>T   | Verified   | TTT | TGC | ATG | 2 | G | T |
| TCGA-30-1714 | HEATR8     | ENST00000421030 | p.R736L  | c.2207G>T  | Unverified | TAC | CGC | CAC | 2 | G | T |
| TCGA-30-1714 | HEATR8_EN: | ENST00000421030 | p.R736L  | c.2207G>T  | Unverified | TAC | CGC | CAC | 2 | G | T |
| TCGA-61-1915 | HECTD3     | NM_024602.4     | p.D500Y  | c.1498G>T  | Unverified | gag | gac | cgg | 1 | G | T |
| TCGA-61-1915 | HECTD3_EN: | ENST00000372168 | p.D394Y  | c.1180G>T  | Unverified | GAG | GAC | CGG | 1 | G | T |
| TCGA-61-1915 | HECTD3_EN: | ENST00000372172 | p.D784Y  | c.2350G>T  | Unverified | GAG | GAC | CGG | 1 | G | T |
| TCGA-61-2009 | HELZ       | ENST00000358691 | p.E122D  | c.366G>T   | Verified   | GGA | GAG | TCC | 3 | G | T |
| TCGA-04-1362 | HEMGN      | ENST00000375112 | p.A154S  | c.460G>T   | Verified   | ATA | GCA | GTA | 1 | G | T |
| TCGA-20-1685 | HERC2      | NM_004667.3     | p.L3391L | c.10173G>T | Unverified | aat | ctg | gcc | 3 | G | T |
| TCGA-13-0924 | HGF        | ENST00000222390 | p.G520*  | c.1558G>T  | Verified   | TGC | GGA | GGA | 1 | G | T |
| TCGA-30-1718 | HGS        | ENST00000329138 | p.A301S  | c.901G>T   | Unverified | TCA | GCG | CCC | 1 | G | T |
| TCGA-24-1844 | HIP1       | ENST00000336926 | p.A911S  | c.2731G>T  | Unverified | ATT | GCT | GCT | 1 | G | T |
| TCGA-24-1417 | HIST1H2AG  | ENST00000359193 | p.G3V    | c.8G>T     | Unverified | TCT | GGA | CGT | 2 | G | T |
| TCGA-04-1655 | HIST1H2BE  | ENST00000356530 | p.V19V   | c.57G>T    | Unverified | GCC | GTG | ACC | 3 | G | T |
| TCGA-13-0755 | HIST1H3A   | ENST00000357647 | p.Q20H   | c.60G>T    | Verified   | AAA | CAG | TTG | 3 | G | T |
| TCGA-24-1604 | HIST1H3H   | ENST00000369163 | p.V90V   | c.270G>T   | Unverified | GCG | GTG | ATG | 3 | G | T |
| TCGA-61-1733 | HIST1H4G   | ENST00000244537 | p.K78N   | c.234G>T   | Unverified | GCC | AAG | CGC | 3 | G | T |
| TCGA-61-1733 | HIST1H4G   | ENST00000244537 | p.K78N   | c.234G>T   | Unverified | GCC | AAG | CGC | 3 | G | T |
| TCGA-13-1481 | HIST1H4J   | ENST00000355057 | p.R96L   | c.287G>T   | Verified   | GGC | CGC | ACC | 2 | G | T |
| TCGA-29-1784 | HIVEP3     | ENST00000372583 | p.M699I  | c.2097G>T  | Unverified | ATG | ATG | CAT | 3 | G | T |
| TCGA-23-1022 | HK2        | ENST00000290573 | p.G74W   | c.220G>T   | Verified   | gat | ggg | aca | 1 | G | T |
| TCGA-61-1998 | HLA-E      | ENST00000376630 | p.W81C   | c.243G>T   | Unverified | TAT | TGG | GAC | 3 | G | T |
| TCGA-13-1481 | HLA-G      | ENST00000360323 | p.D338Y  | c.1012G>T  | Verified   | TCA | GAT | TGA | 1 | G | T |
| TCGA-09-2049 | HMCN1      | ENST00000271588 | p.G506C  | c.1516G>T  | Verified   | GCA | GGT | ACT | 1 | G | T |
| TCGA-23-1117 | HMCN1      | ENST00000271588 | p.D5165Y | c.15493G>T | Verified   | TGT | GAC | AAT | 1 | G | T |
| TCGA-23-1117 | HMCN1      | ENST00000271588 | p.D5165Y | c.15493G>T | Verified   | TGT | GAC | AAT | 1 | G | T |
| TCGA-25-1318 | HMCN1      | ENST00000271588 | p.V4990L | c.14968G>T | Verified   | GTT | GTG | AGT | 1 | G | T |
| TCGA-25-1318 | HMCN1      | ENST00000271588 | p.V4990L | c.14968G>T | Verified   | GTT | GTG | AGT | 1 | G | T |
| TCGA-04-1338 | HNF1B      | ENST00000225893 | p.G349*  | c.1045G>T  | Verified   | TCA | GGA | GTG | 1 | G | T |
| TCGA-24-1103 | HNRNPA3    | ENST00000392524 | p.G295V  | c.884G>T   | Verified   | CCA | GGA | TAT | 2 | G | T |
| TCGA-24-2267 | HNRNPA3    | ENST00000392524 | p.G288V  | c.863G>T   | Verified   | GGG | GGC | TAT | 2 | G | T |

|              |             |                 |          |             |            |     |     |     |   |   |   |
|--------------|-------------|-----------------|----------|-------------|------------|-----|-----|-----|---|---|---|
| TCGA-29-1781 | HNRNPH2     | ENST00000316594 | p.G149W  | c.445G>T    | Unverified | cag | ggg | cga | 1 | G | T |
| TCGA-13-1498 | HNRNPL      | ENST00000221419 | p.L109L  | c.327G>T    | Unverified | GGC | CTG | ATT | 3 | G | T |
| TCGA-61-2113 | HOXA1       | ENST00000343060 | p.G84G   | c.252G>T    | Unverified | TCC | GGG | AAC | 3 | G | T |
| TCGA-25-2400 | HR          | ENST00000381418 | p.A295S  | c.883G>T    | Unverified | TGG | GCT | GGG | 1 | G | T |
| TCGA-13-0900 | HRH1        | ENST00000397056 | p.A23S   | c.67G>T     | Verified   | ATG | GCC | AGC | 1 | G | T |
| TCGA-24-1845 | HRH2        | ENST00000231683 | p.G5C    | c.13G>T     | Unverified | AAT | GGC | ACA | 1 | G | T |
| TCGA-24-1845 | HRH2_ENST0  | ENST00000377291 | p.G5C    | c.13G>T     | Unverified | AAT | GGC | ACA | 1 | G | T |
| TCGA-24-1431 | HRNR        | ENST00000368801 | p.R567S  | c.1701G>T   | Unverified | GGG | AGG | TCT | 3 | G | T |
| TCGA-23-1118 | HSD3B1      | ENST00000369413 | p.A349S  | c.1045G>T   | Verified   | GAA | GCC | AAG | 1 | G | T |
| TCGA-29-1769 | HSF4        | ENST00000264009 | p.M212I  | c.636G>T    | Unverified | CTG | ATG | CTG | 3 | G | T |
| TCGA-61-2109 | HSPA12B     | ENST00000254963 | p.S117I  | c.350G>T    | Unverified | cac | agc | ttt | 2 | G | T |
| TCGA-25-2393 | HSPA4L      | ENST00000508776 | p.A754S  | c.2260G>T   | Verified   | aat | gca | cag | 1 | G | T |
| TCGA-13-1488 | HSPA5       | ENST00000324460 | p.Q343H  | c.1029G>T   | Verified   | gtc | cag | aaa | 3 | G | T |
| TCGA-30-1857 | HTR5A       | ENST00000287907 | p.G110C  | c.328G>T    | Unverified | CTA | GGT | CGG | 1 | G | T |
| TCGA-23-1122 | HTT         | ENST00000355072 | p.?      | c.9054+1G>T | Unverified | TAT | AAG | GTG | 3 | G | T |
| TCGA-13-0887 | HUWE1       | XM_497119.1     | p.?      | c.8767-1G>T | Verified   | gaa | gta | ctg | 1 | G | T |
| TCGA-61-1900 | HUWE1       | XM_497119.1     | p.V131L  | c.391G>T    | Unverified | gtg | gtg | ctg | 1 | G | T |
| TCGA-24-2289 | HUWE1       | XM_497119.1     | p.Q2206H | c.6618G>T   | Unverified | atg | cag | gtt | 3 | G | T |
| TCGA-61-1900 | HUWE1       | XM_497119.1     | p.E2930D | c.8790G>T   | Unverified | gct | gag | cag | 3 | G | T |
| TCGA-61-1900 | HUWE1_ENST0 | ENST00000342160 | p.V131L  | c.391G>T    | Unverified | GTG | GTG | CTG | 1 | G | T |
| TCGA-61-1900 | HUWE1_ENST0 | ENST00000342160 | p.E3040D | c.9120G>T   | Unverified | GCT | GAG | CAG | 3 | G | T |
| TCGA-24-1422 | IBTK        | ENST00000306270 | p.V619V  | c.1857G>T   | Unverified | TTT | GTG | GTA | 3 | G | T |
| TCGA-24-1417 | ICK         | ENST00000350082 | p.Q365H  | c.1095G>T   | Verified   | ctc | cag | gag | 3 | G | T |
| TCGA-29-1763 | ICMT        | ENST00000343813 | p.S118I  | c.353G>T    | Unverified | aaa | agt | ctg | 2 | G | T |
| TCGA-24-0979 | IDO2        | ENST00000389060 | p.E24D   | c.72G>T     | Verified   | GAA | GAG | TAT | 3 | G | T |
| TCGA-09-2044 | IFI35       | ENST00000438323 | p.V173F  | c.517G>T    | Verified   | GAC | GTT | CGG | 1 | G | T |
| TCGA-61-2012 | IFNA13      | ENST00000449498 | p.V13L   | c.37G>T     | Verified   | CTG | GTG | GTG | 1 | G | T |
| TCGA-24-1422 | IFT122      | ENST00000296266 | p.V819L  | c.2455G>T   | Verified   | GCC | GTG | GAG | 1 | G | T |
| TCGA-24-2288 | IFT122      | ENST00000296266 | p.?      | c.1300+1G>T | Unverified | AAA | GTT | CGG | 1 | G | T |
| TCGA-24-1563 | IGDCC3      | ENST00000327987 | p.G644V  | c.1931G>T   | Verified   | ATC | GGC | ATC | 2 | G | T |
| TCGA-61-1737 | IGF2R       | ENST00000356956 | p.A380S  | c.1138G>T   | Unverified | GCT | GCA | GTT | 1 | G | T |
| TCGA-24-2280 | IK_ENST0000 | ENST00000417647 | p.A50S   | c.148G>T    | Unverified | TCT | GCA | CCA | 1 | G | T |
| TCGA-20-1687 | IL12RB1     | ENST00000322153 | p.E266*  | c.796G>T    | Unverified | CTG | GAG | CTT | 1 | G | T |
| TCGA-20-1687 | IL12RB1_EN  | ENST00000430026 | p.E266*  | c.796G>T    | Unverified | CTG | GAG | CTT | 1 | G | T |

|              |             |                 |          |           |            |     |     |     |   |   |   |
|--------------|-------------|-----------------|----------|-----------|------------|-----|-----|-----|---|---|---|
| TCGA-09-2044 | IL18RAP     | ENST00000264260 | p.V238F  | c.712G>T  | Verified   | GTT | GTT | CAA | 1 | G | T |
| TCGA-29-1777 | IL1F8       | ENST00000327407 | p.A7S    | c.19G>T   | Unverified | GAG | GCA | GCA | 1 | G | T |
| TCGA-25-2391 | IL1RN       | ENST00000361779 | p.K62N   | c.186G>T  | Unverified | GTC | AAG | TCT | 3 | G | T |
| TCGA-24-1844 | IL24        | ENST00000294984 | p.Q29H   | c.87G>T   | Unverified | ATG | CAG | ATG | 3 | G | T |
| TCGA-13-1510 | IL27RA      | ENST00000263379 | p.R514M  | c.1541G>T | Unverified | CTG | AGG | TGG | 2 | G | T |
| TCGA-29-1777 | IL36B       | ENST00000259213 | p.A7S    | c.19G>T   | Unverified | GAG | GCA | GCA | 1 | G | T |
| TCGA-29-1777 | IL36B_ENST0 | ENST00000259213 | p.A7S    | c.19G>T   | Unverified | GAG | GCA | GCA | 1 | G | T |
| TCGA-24-1844 | IMPA2       | ENST00000269159 | p.R178L  | c.533G>T  | Unverified | aaa | cgt | gac | 2 | G | T |
| TCGA-13-0760 | ING2        | ENST00000302327 | p.W253C  | c.759G>T  | Verified   | AAA | TGG | TAT | 3 | G | T |
| TCGA-61-2012 | INMT        | ENST00000013222 | p.E220*  | c.658G>T  | Unverified | GAG | GAG | GTG | 1 | G | T |
| TCGA-24-1470 | INPP1       | ENST00000392329 | p.G187C  | c.559G>T  | Verified   | ATT | GGT | GTC | 1 | G | T |
| TCGA-13-1509 | INPP4B      | NM_003866.1     | p.D674Y  | c.2020G>T | Verified   | agc | gat | gaa | 1 | G | T |
| TCGA-29-1781 | INPP5B      | XM_375718.1     | p.K246N  | c.738G>T  | Unverified | gag | aag | aca | 3 | G | T |
| TCGA-29-1781 | INPP5B_ENS  | ENST00000373026 | p.K209N  | c.627G>T  | Unverified | GAG | AAG | ACA | 3 | G | T |
| TCGA-13-0890 | INPP5F      | ENST00000361976 | p.V1055L | c.3163G>T | Verified   | cat | gta | act | 1 | G | T |
| TCGA-13-1498 | INSR_ENST0  | ENST00000302850 | p.D1293Y | c.3877G>T | Unverified | GAC | GAC | CTG | 1 | G | T |
| TCGA-13-0883 | INSRR       | ENST00000368195 | p.S197I  | c.590G>T  | Verified   | TTC | AGC | GGG | 2 | G | T |
| TCGA-24-2262 | INTS10      | ENST00000397977 | p.E491D  | c.1473G>T | Unverified | CTG | GAG | CAT | 3 | G | T |
| TCGA-13-0920 | INTS2       | ENST00000444766 | p.C998F  | c.2993G>T | Verified   | ATC | TGT | TGT | 2 | G | T |
| TCGA-24-1847 | INTS9       | ENST00000521022 | p.V16L   | c.46G>T   | Unverified | AAT | GTG | CTC | 1 | G | T |
| TCGA-09-2051 | INVS        | ENST00000262457 | p.V370F  | c.1108G>T | Unverified | CAT | GTC | AGC | 1 | G | T |
| TCGA-61-1914 | IPO9        | ENST00000361565 | p.E887*  | c.2659G>T | Unverified | GAG | GAG | ATC | 1 | G | T |
| TCGA-13-0761 | IQSEC2      | XM_291345.2     | p.V1002L | c.3004G>T | Verified   | ctt | gtg | gtc | 1 | G | T |
| TCGA-13-0761 | IQSEC2      | XM_291345.2     | p.V1002L | c.3004G>T | Verified   | ctt | gtg | gtc | 1 | G | T |
| TCGA-24-1431 | IQSEC2      | XM_291345.2     | p.E734D  | c.2202G>T | Unverified | cgg | gag | aca | 3 | G | T |
| TCGA-13-0887 | IQUB        | ENST00000324698 | p.A10S   | c.28G>T   | Verified   | GAA | GCT | CAG | 1 | G | T |
| TCGA-23-1031 | IQUB        | ENST00000324698 | p.V88F   | c.262G>T  | Verified   | CAA | GTT | TCA | 1 | G | T |
| TCGA-13-0906 | IRAK3       | ENST00000261233 | p.M314I  | c.942G>T  | Verified   | GCC | ATG | GCA | 3 | G | T |
| TCGA-13-0885 | IRF9        | ENST00000396864 | p.R142S  | c.426G>T  | Verified   | GAG | AGG | AAG | 3 | G | T |
| TCGA-04-1367 | IRS1        | ENST00000305123 | p.G1154V | c.3461G>T | Verified   | cct | ggg | gag | 2 | G | T |
| TCGA-13-1501 | ITFG1       | ENST00000320640 | p.G54W   | c.160G>T  | Verified   | TTC | GGG | GAC | 1 | G | T |
| TCGA-13-1501 | ITFG1       | ENST00000320640 | p.G54W   | c.160G>T  | Verified   | TTC | GGG | GAC | 1 | G | T |
| TCGA-13-0906 | ITGA2B      | ENST00000262407 | p.R889L  | c.2666G>T | Verified   | gat | cgc | aga | 2 | G | T |
| TCGA-13-1488 | ITGA4       | ENST00000397033 | p.G490*  | c.1468G>T | Verified   | AAT | GGA | TGG | 1 | G | T |

|              |            |                     |         |             |            |     |     |     |   |   |   |
|--------------|------------|---------------------|---------|-------------|------------|-----|-----|-----|---|---|---|
| TCGA-24-1850 | ITGAE      | ENST00000263087     | p.S567I | c.1700G>T   | Unverified | CTG | AGT | GGG | 2 | G | T |
| TCGA-30-1891 | ITGAM      | ENST00000287497     | p.G607G | c.1821G>T   | Unverified | cag | ggg | cac | 3 | G | T |
| TCGA-13-0923 | ITK        | ENST00000422843     | p.A349S | c.1045G>T   | Verified   | ACA | GCA | GGG | 1 | G | T |
| TCGA-13-0920 | ITLN1      | ENST00000326245     | p.L179L | c.537G>T    | Verified   | ACA | CTG | GGA | 3 | G | T |
| TCGA-20-0991 | JMJD8_ENST | ENST00000293882_v62 | p.G254G | c.762G>T    | Unverified | CCC | GGG | TAC | 3 | G | T |
| TCGA-61-1915 | KANK1      | ENST00000382293     | p.V358V | c.1074G>T   | Unverified | GTG | GTG | GAG | 3 | G | T |
| TCGA-61-1915 | KANK1_ENS  | ENST00000382303     | p.V516V | c.1548G>T   | Unverified | GTG | GTG | GAG | 3 | G | T |
| TCGA-29-1693 | KBTBD5     | ENST00000287777     | p.E294* | c.880G>T    | Unverified | GAG | GAG | GAT | 1 | G | T |
| TCGA-09-2050 | KBTBD5     | ENST00000287777     | p.L104F | c.312G>T    | Verified   | GAT | TTG | TTC | 3 | G | T |
| TCGA-24-1845 | KCNA4      | ENST00000328224     | p.V276L | c.826G>T    | Unverified | TTT | GTG | AGA | 1 | G | T |
| TCGA-13-0887 | KCNAB1_EN  | ENST00000490337     | p.L63L  | c.189G>T    | Verified   | CTG | CTG | CGC | 3 | G | T |
| TCGA-25-1313 | KCNB2      | ENST00000523207     | p.L524L | c.1572G>T   | Verified   | CAG | CTG | AAC | 3 | G | T |
| TCGA-13-0904 | KCND2      | ENST00000331113     | p.T234T | c.702G>T    | Verified   | GAC | ACG | GCC | 3 | G | T |
| TCGA-24-2267 | KCNE3      | ENST00000310128     | p.R88L  | c.263G>T    | Verified   | AAG | CGT | AGT | 2 | G | T |
| TCGA-13-0760 | KCNH1      | ENST00000271751     | p.Q344H | c.1032G>T   | Verified   | AGT | CAG | GGC | 3 | G | T |
| TCGA-13-0900 | KCNH5      | ENST00000322893     | p.S161I | c.482G>T    | Unverified | CGA | AGT | GTT | 2 | G | T |
| TCGA-24-2262 | KCNH5      | ENST00000322893     | p.G46V  | c.137G>T    | Verified   | GAC | GGT | TTT | 2 | G | T |
| TCGA-04-1342 | KCNH6      | ENST00000583023     | p.A83A  | c.249G>T    | Unverified | CTA | GCG | CAG | 3 | G | T |
| TCGA-24-1616 | KCNH8      | ENST00000328405     | p.D132Y | c.394G>T    | Verified   | AAA | GAT | ATA | 1 | G | T |
| TCGA-29-1761 | KCNK2      | ENST00000391894     | p.?     | c.431-1G>T  | Unverified | ATA | GGA | TTT | 2 | G | T |
| TCGA-29-1761 | KCNK2_ENS  | ENST00000444842     | p.?     | c.476-1G>T  | Unverified | ATA | GGA | TTT | 2 | G | T |
| TCGA-13-0885 | KCNK3      | ENST00000302909     | p.G231V | c.692G>T    | Verified   | ACG | GGC | CTC | 2 | G | T |
| TCGA-29-1785 | KCNQ1      | ENST00000155840     | p.M476I | c.1428G>T   | Unverified | AGC | ATG | CCC | 3 | G | T |
| TCGA-29-1785 | KCNQ1      | ENST00000155840     | p.M476I | c.1428G>T   | Unverified | AGC | ATG | CCC | 3 | G | T |
| TCGA-30-1856 | KCNU1      | ENST00000399881     | p.D991Y | c.2971G>T   | Unverified | TTA | GAT | CTT | 1 | G | T |
| TCGA-30-1856 | KCNU1_ENS  | ENST00000399881     | p.D991Y | c.2971G>T   | Unverified | TTA | GAT | CTT | 1 | G | T |
| TCGA-61-2102 | KCTD18     | ENST00000359878     | p.R32L  | c.95G>T     | Verified   | TGC | CGC | TTC | 2 | G | T |
| TCGA-13-1497 | KDM2B      | NM_032590.2         | p.D863Y | c.2587G>T   | Verified   | ctg | gac | atc | 1 | G | T |
| TCGA-13-1481 | KEL        | ENST00000355265     | p.A473S | c.1417G>T   | Verified   | GTT | GCT | CAA | 1 | G | T |
| TCGA-13-0793 | KHNYN      | ENST00000251343     | p.?     | c.1788-1G>T | Verified   | GCC | AGG | ACA | 3 | G | T |
| TCGA-24-0979 | KIAA0232   | ENST00000307659     | p.A295S | c.883G>T    | Verified   | GAA | GCA | GGC | 1 | G | T |
| TCGA-61-1910 | KIAA0319   | ENST00000378214     | p.E246* | c.736G>T    | Unverified | GGA | GAG | GTG | 1 | G | T |
| TCGA-61-1914 | KIAA0319L  | ENST00000335883     | p.?     | c.666+1G>T  | Unverified | GCA | GAG | GTC | 3 | G | T |
| TCGA-61-1914 | KIAA0319L_ | ENST00000325722     | p.?     | c.666+1G>T  | Unverified | GCA | GAG | GTC | 3 | G | T |

|              |            |                 |          |             |            |     |     |     |   |   |   |
|--------------|------------|-----------------|----------|-------------|------------|-----|-----|-----|---|---|---|
| TCGA-13-0906 | KIAA0430   | ENST00000396368 | p.G235V  | c.704G>T    | Unverified | CCA | GGG | CAT | 2 | G | T |
| TCGA-29-1777 | KIAA0467_E | ENST00000372442 | p.D634Y  | c.1900G>T   | Unverified | TCA | GAC | GTA | 1 | G | T |
| TCGA-29-1781 | KIAA0556   | ENST00000261588 | p.S890I  | c.2669G>T   | Unverified | CGC | AGT | GAG | 2 | G | T |
| TCGA-24-1417 | KIAA0556   | ENST00000261588 | p.V1520V | c.4560G>T   | Verified   | CTG | GTG | GAC | 3 | G | T |
| TCGA-24-2262 | KIAA0556   | ENST00000261588 | p.V1497V | c.4491G>T   | Verified   | ACC | GTG | TCA | 3 | G | T |
| TCGA-29-1781 | KIAA0556_E | ENST00000261588 | p.S890I  | c.2669G>T   | Unverified | CGC | AGT | GAG | 2 | G | T |
| TCGA-13-1510 | KIAA1024   | ENST00000305428 | p.V536L  | c.1606G>T   | Unverified | GGA | GTG | ATA | 1 | G | T |
| TCGA-20-1683 | KIAA1210   | XM_172801.3     | p.R988M  | c.2963G>T   | Unverified | aag | agg | tct | 2 | G | T |
| TCGA-25-2401 | KIAA1217   | ENST00000376454 | p.E795D  | c.2385G>T   | Verified   | AAG | GAG | GAG | 3 | G | T |
| TCGA-09-2050 | KIAA1244   | NM_020340.2     | p.Q41H   | c.123G>T    | Verified   | ctg | cag | gtg | 3 | G | T |
| TCGA-13-1497 | KIAA1274   | ENST00000263563 | p.W453C  | c.1359G>T   | Verified   | CGC | TGG | CTG | 3 | G | T |
| TCGA-61-1906 | KIAA1310   | ENST00000431828 | p.?      | c.1933+1G>T | Unverified | GAA | GCT | GCA | 1 | G | T |
| TCGA-61-1906 | KIAA1310   | ENST00000431828 | p.?      | c.1933+1G>T | Unverified | GAA | GCT | GCA | 1 | G | T |
| TCGA-29-1696 | KIAA1409   | ENST00000256339 | p.C623F  | c.1868G>T   | Unverified | AAT | TGT | TTC | 2 | G | T |
| TCGA-29-1696 | KIAA1409   | ENST00000256339 | p.C623F  | c.1868G>T   | Unverified | AAT | TGT | TTC | 2 | G | T |
| TCGA-24-1464 | KIAA1462   | ENST00000375377 | p.E577*  | c.1729G>T   | Verified   | AAC | GAG | ACT | 1 | G | T |
| TCGA-20-0990 | KIAA1468   | ENST00000398130 | p.V324V  | c.972G>T    | Verified   | GAT | GTG | GCC | 3 | G | T |
| TCGA-29-1696 | KIAA1543   | ENST00000160298 | p.C1167F | c.3500G>T   | Unverified | AGC | TGC | CAG | 2 | G | T |
| TCGA-29-1696 | KIAA1543   | ENST00000160298 | p.C1167F | c.3500G>T   | Unverified | AGC | TGC | CAG | 2 | G | T |
| TCGA-09-2056 | KIAA1609   | ENST00000343629 | p.V138L  | c.412G>T    | Verified   | GTG | GTG | CAC | 1 | G | T |
| TCGA-24-2267 | KIAA1614   | ENST00000367588 | p.V339L  | c.1015G>T   | Unverified | GAT | GTG | GAC | 1 | G | T |
| TCGA-13-0900 | KIAA1614   | ENST00000367588 | p.G285V  | c.854G>T    | Verified   | CTG | GGC | GCT | 2 | G | T |
| TCGA-24-1422 | KIAA1614   | ENST00000367588 | p.R1061L | c.3182G>T   | Verified   | CGT | CGG | AAA | 2 | G | T |
| TCGA-61-1910 | KIAA1614   | ENST00000367588 | p.V96V   | c.288G>T    | Unverified | ACA | GTG | GCC | 3 | G | T |
| TCGA-23-1022 | KIAA1797   | ENST00000380249 | p.G792W  | c.2374G>T   | Verified   | CGT | GGG | ATA | 1 | G | T |
| TCGA-61-1910 | KIF16B     | ENST00000354981 | p.V1111F | c.3331G>T   | Unverified | ctg | gtt | ccc | 1 | G | T |
| TCGA-61-1910 | KIF16B_ENS | ENST00000408042 | p.V1111F | c.3331G>T   | Unverified | CTG | GTT | CCC | 1 | G | T |
| TCGA-24-1845 | KIF16B_ENS | ENST00000408042 | p.C1184F | c.3551G>T   | Unverified | GCC | TGC | GCT | 2 | G | T |
| TCGA-23-1116 | KIF1A      | ENST00000320389 | p.G997C  | c.2989G>T   | Unverified | CTG | GGC | AAC | 1 | G | T |
| TCGA-29-1777 | KIF1A      | ENST00000320389 | p.W57L   | c.170G>T    | Unverified | TAC | TGG | TCG | 2 | G | T |
| TCGA-13-0761 | KIF1B      | ENST00000263934 | p.C853F  | c.2558G>T   | Verified   | GGC | TGT | GTG | 2 | G | T |
| TCGA-13-0761 | KIF1B      | ENST00000263934 | p.C853F  | c.2558G>T   | Verified   | GGC | TGT | GTG | 2 | G | T |
| TCGA-13-0904 | KIF25      | ENST00000354419 | p.W3C    | c.9G>T      | Verified   | ACA | TGG | ACC | 3 | G | T |
| TCGA-61-2009 | KIF3B      | ENST00000375712 | p.E609*  | c.1825G>T   | Verified   | GAG | GAA | GAT | 1 | G | T |

|              |            |                 |          |             |            |     |     |     |   |   |   |
|--------------|------------|-----------------|----------|-------------|------------|-----|-----|-----|---|---|---|
| TCGA-24-1463 | KIF4B      | ENST00000435029 | p.G748V  | c.2243G>T   | Unverified | CTT | GGA | AAT | 2 | G | T |
| TCGA-13-0755 | KIF4B_ENST | ENST00000435029 | p.G283C  | c.847G>T    | Verified   | AAG | GGT | AGC | 1 | G | T |
| TCGA-24-1463 | KIF4B_ENST | ENST00000435029 | p.G748V  | c.2243G>T   | Unverified | CTT | GGA | AAT | 2 | G | T |
| TCGA-13-0761 | KIF6       | ENST00000287152 | p.L275F  | c.825G>T    | Unverified | AAC | TTG | TCA | 3 | G | T |
| TCGA-13-0761 | KIF6       | ENST00000287152 | p.L275F  | c.825G>T    | Unverified | AAC | TTG | TCA | 3 | G | T |
| TCGA-24-2290 | KIRREL3    | ENST00000278934 | p.E420D  | c.1260G>T   | Verified   | CTG | GAG | TCG | 3 | G | T |
| TCGA-24-2290 | KIRREL3    | ENST00000278934 | p.E420D  | c.1260G>T   | Verified   | CTG | GAG | TCG | 3 | G | T |
| TCGA-24-1423 | KLF15      | ENST00000296233 | p.G327C  | c.979G>T    | Unverified | CCT | GGC | TGC | 1 | G | T |
| TCGA-09-2049 | KLF17      | ENST00000372299 | p.Q242H  | c.726G>T    | Verified   | AGT | CAG | CCA | 3 | G | T |
| TCGA-29-1711 | KLF5       | ENST00000377687 | p.S133I  | c.398G>T    | Unverified | TAC | AGT | ATC | 2 | G | T |
| TCGA-29-1711 | KLF5       | ENST00000377687 | p.S133I  | c.398G>T    | Unverified | TAC | AGT | ATC | 2 | G | T |
| TCGA-23-1031 | KLF5       | ENST00000377687 | p.M281I  | c.843G>T    | Verified   | GGC | ATG | CCC | 3 | G | T |
| TCGA-61-2095 | KLHL14     | ENST00000359358 | p.E558D  | c.1674G>T   | Unverified | TTG | GAG | GGT | 3 | G | T |
| TCGA-29-1784 | KLHL8      | ENST00000273963 | p.R404L  | c.1211G>T   | Unverified | AGG | CGA | GGA | 2 | G | T |
| TCGA-36-1577 | KLK10      | ENST00000391805 | p.G106V  | c.317G>T    | Unverified | cag | gga | gag | 2 | G | T |
| TCGA-24-1844 | KLRG1      | ENST00000356986 | p.W132L  | c.395G>T    | Unverified | TGC | TGG | ATT | 2 | G | T |
| TCGA-24-2288 | KNCN       | ENST00000481882 | p.L13L   | c.39G>T     | Unverified | GGC | CTG | CAG | 3 | G | T |
| TCGA-10-0930 | KNTC1      | ENST00000333479 | p.W539L  | c.1616G>T   | Verified   | tct | tgg | att | 2 | G | T |
| TCGA-10-0930 | KNTC1      | ENST00000333479 | p.W539L  | c.1616G>T   | Verified   | tct | tgg | att | 2 | G | T |
| TCGA-24-2035 | KRT4       | ENST00000293774 | p.E465*  | c.1393G>T   | Verified   | GGT | GAG | AAT | 1 | G | T |
| TCGA-13-1497 | KRT4       | ENST00000293774 | p.S560I  | c.1679G>T   | Verified   | AGT | AGT | GGC | 2 | G | T |
| TCGA-13-1501 | KRT6A      | ENST00000330722 | p.S540I  | c.1619G>T   | Verified   | CTC | AGC | TCT | 2 | G | T |
| TCGA-13-1501 | KRT6A      | ENST00000330722 | p.S540I  | c.1619G>T   | Verified   | CTC | AGC | TCT | 2 | G | T |
| TCGA-04-1655 | KRT78      | ENST00000304620 | p.D192Y  | c.574G>T    | Unverified | CGG | GAC | CAG | 1 | G | T |
| TCGA-09-2050 | KRT78      | ENST00000304620 | p.E291*  | c.871G>T    | Verified   | GAG | GAG | ATC | 1 | G | T |
| TCGA-61-2095 | KSR1_ENST  | ENST00000319524 | p.?      | c.2157+1G>T | Unverified | ATC | AAG | GGC | 3 | G | T |
| TCGA-13-0906 | KTI12      | ENST00000371614 | p.A288S  | c.862G>T    | Unverified | GAA | GCG | CAG | 1 | G | T |
| TCGA-13-0886 | L3MBTL3    | ENST00000368136 | p.A351S  | c.1051G>T   | Verified   | AAA | GCT | CAA | 1 | G | T |
| TCGA-24-0979 | LAMA1      | ENST00000389658 | p.D691Y  | c.2071G>T   | Verified   | CTG | GAC | ATA | 1 | G | T |
| TCGA-13-0900 | LAMA2      | ENST00000421865 | p.R369L  | c.1106G>T   | Verified   | ATA | CGT | GGA | 2 | G | T |
| TCGA-61-2012 | LAMA2      | ENST00000421865 | p.R1366L | c.4097G>T   | Verified   | GGA | CGT | GGA | 2 | G | T |
| TCGA-13-0924 | LAMA3      | ENST00000313654 | p.S2834I | c.8501G>T   | Verified   | ggc | agc | cca | 2 | G | T |
| TCGA-23-1118 | LAMB3      | ENST00000367030 | p.E1065* | c.3193G>T   | Verified   | GCG | GAA | GGT | 1 | G | T |
| TCGA-29-1775 | LAMC3      | ENST00000361069 | p.V654F  | c.1960G>T   | Unverified | GAG | GTC | CGG | 1 | G | T |

|              |            |                 |          |             |            |     |     |     |   |   |   |
|--------------|------------|-----------------|----------|-------------|------------|-----|-----|-----|---|---|---|
| TCGA-13-0791 | LAMP2      | ENST00000371335 | p.?      | c.556+1G>T  | Verified   | aat | gag | ttc | 1 | G | T |
| TCGA-09-2050 | LARP1      | ENST00000377643 | p.?      | c.2233+1G>T | Verified   | CAA | GTT | CCT | 1 | G | T |
| TCGA-13-0904 | LASS3      | ENST00000284382 | p.E114*  | c.340G>T    | Verified   | GTG | GAA | AGA | 1 | G | T |
| TCGA-29-1762 | LCE1F      | ENST00000334371 | p.G64C   | c.190G>T    | Unverified | GGG | GGT | GGT | 1 | G | T |
| TCGA-04-1347 | LCT        | ENST00000264162 | p.V971L  | c.2911G>T   | Verified   | AAG | GTG | AAG | 1 | G | T |
| TCGA-20-0990 | LCT        | ENST00000264162 | p.G910V  | c.2729G>T   | Verified   | TGG | GGC | GTG | 2 | G | T |
| TCGA-13-0885 | LDLRAP1    | ENST00000374338 | p.L31L   | c.93G>T     | Verified   | AAG | CTG | CCT | 3 | G | T |
| TCGA-29-1777 | LEF1       | ENST00000265165 | p.?      | c.280+1G>T  | Unverified | gac | gga | aag | 1 | G | T |
| TCGA-29-1777 | LEF1_ENST0 | ENST00000510624 | p.?      | c.76+1G>T   | Unverified | GAC | GGA | AAG | 1 | G | T |
| TCGA-24-1469 | LGALS3BP   | ENST00000262776 | p.D262Y  | c.784G>T    | Verified   | CTG | GAC | CTG | 1 | G | T |
| TCGA-24-1431 | LGR4       | ENST00000379214 | p.R941L  | c.2822G>T   | Verified   | GTG | CGC | TAT | 2 | G | T |
| TCGA-61-1913 | LGR6       | ENST00000367278 | p.L816L  | c.2448G>T   | Unverified | GTG | CTG | CCC | 3 | G | T |
| TCGA-24-2289 | LIAS       | ENST00000261434 | p.A222S  | c.664G>T    | Unverified | AAA | GCA | ATA | 1 | G | T |
| TCGA-23-1021 | LINS       | ENST00000314742 | p.V15L   | c.43G>T     | Verified   | AAG | GTA | CTT | 1 | G | T |
| TCGA-13-0795 | LLOXNC01-2 | ENST00000218249 | p.T70T   | c.210G>T    | Verified   | gat | acg | tcg | 3 | G | T |
| TCGA-24-0975 | LMAN1      | ENST00000251047 | p.G71G   | c.213G>T    | Unverified | GCG | GGG | AAT | 3 | G | T |
| TCGA-20-0990 | LMTK3_ENS  | ENST00000270238 | p.A1484S | c.4450G>T   | Unverified | CCC | GCA | GGC | 1 | G | T |
| TCGA-13-0883 | LNPEP      | ENST00000231368 | p.E40*   | c.118G>T    | Verified   | cta | gag | cct | 1 | G | T |
| TCGA-13-0923 | LNPEP      | ENST00000231368 | p.R515L  | c.1544G>T   | Verified   | gct | cga | ttt | 2 | G | T |
| TCGA-61-1899 | LOC347421  | XM_498372.1     | p.G37C   | c.109G>T    | Unverified | ggg | ggt | acc | 1 | G | T |
| TCGA-30-1857 | LOC388972  | XM_371511.3     | p.A199S  | c.595G>T    | Unverified | tct | gct | gca | 1 | G | T |
| TCGA-24-1422 | LOC51059   | ENST00000395297 | p.V12L   | c.34G>T     | Verified   | TCG | GTA | GAG | 1 | G | T |
| TCGA-24-1463 | LOC651503  | ENST00000377164 | p.C110F  | c.329G>T    | Unverified | GAA | TGT | ATG | 2 | G | T |
| TCGA-13-0883 | LOC728378  | ENST00000357462 | p.K100N  | c.300G>T    | Verified   | GGC | AAG | TGG | 3 | G | T |
| TCGA-29-1695 | LONRF2     | ENST00000393437 | p.E381*  | c.1141G>T   | Unverified | TTT | GAA | GAG | 1 | G | T |
| TCGA-29-1699 | LPA        | ENST00000316300 | p.R820S  | c.2460G>T   | Unverified | CAG | AGG | CCT | 3 | G | T |
| TCGA-24-1470 | LPAR4      | ENST00000435339 | p.D307Y  | c.919G>T    | Verified   | ttt | gac | cct | 1 | G | T |
| TCGA-24-1463 | LPIN3      | ENST00000373257 | p.D336Y  | c.1006G>T   | Verified   | GGG | GAC | ATG | 1 | G | T |
| TCGA-09-2050 | LRFN5      | ENST00000298119 | p.E717*  | c.2149G>T   | Verified   | CTG | GAG | TTA | 1 | G | T |
| TCGA-61-1914 | LRIG1      | AF381545.1      | p.A984S  | c.2950G>T   | Unverified | act | gcc | gct | 1 | G | T |
| TCGA-13-0714 | LRP1       | ENST00000243077 | p.G4316V | c.12947G>T  | Unverified | TTT | GGC | ACA | 2 | G | T |
| TCGA-61-1907 | LRP1       | ENST00000243077 | p.C2800F | c.8399G>T   | Unverified | GAC | TGT | GCT | 2 | G | T |
| TCGA-09-1665 | LRP1       | ENST00000243077 | p.V4081V | c.12243G>T  | Verified   | ATT | GTG | GCT | 3 | G | T |
| TCGA-30-1857 | LRP10      | ENST00000359591 | p.G168V  | c.503G>T    | Unverified | GAT | GGC | TCT | 2 | G | T |

|              |            |                     |          |            |            |     |     |     |   |   |   |
|--------------|------------|---------------------|----------|------------|------------|-----|-----|-----|---|---|---|
| TCGA-29-1783 | LRRC2      | ENST00000296144     | p.E52*   | c.154G>T   | Unverified | GCC | GAA | TGC | 1 | G | T |
| TCGA-13-1497 | LRRC30     | ENST00000383467     | p.E143*  | c.427G>T   | Verified   | CTG | GAG | GTC | 1 | G | T |
| TCGA-24-1422 | LRRC33     | ENST00000328557     | p.R645R  | c.1935G>T  | Unverified | GAG | CGG | CTG | 3 | G | T |
| TCGA-23-1110 | LRRC52     | ENST00000294818     | p.G10G   | c.30G>T    | Verified   | CCT | GGG | TGG | 3 | G | T |
| TCGA-20-0990 | LRRC55     | ENST00000497933     | p.E133D  | c.399G>T   | Unverified | ATG | GAG | CTC | 3 | G | T |
| TCGA-13-1497 | LRRC7_ENST | ENST00000370958     | p.R23L   | c.68G>T    | Verified   | GTT | CGT | GCA | 2 | G | T |
| TCGA-13-0760 | LRRK2      | SU_LRRK2            | p.V2163F | c.6487G>T  | Verified   | atg | gtt | gct | 1 | G | T |
| TCGA-13-0760 | LRRK2_ENST | ENST00000298910     | p.V2156F | c.6466G>T  | Verified   | ATG | GTT | GCT | 1 | G | T |
| TCGA-24-1843 | LRRN3      | ENST00000308478     | p.V233F  | c.697G>T   | Unverified | TTG | GTT | GGA | 1 | G | T |
| TCGA-04-1356 | LRRTM1     | ENST00000295057     | p.S251S  | c.753G>T   | Verified   | AGC | TCG | CTG | 3 | G | T |
| TCGA-29-1699 | LTA4H      | ENST00000228740     | p.V196F  | c.586G>T   | Unverified | AAA | GTT | CCA | 1 | G | T |
| TCGA-29-1763 | LYPLA1     | ENST00000316963     | p.V186V  | c.558G>T   | Unverified | ACG | GTG | GAA | 3 | G | T |
| TCGA-23-1123 | LYST       | ENST00000389793     | p.Q1208H | c.3624G>T  | Verified   | TCT | CAG | TGT | 3 | G | T |
| TCGA-23-1123 | LYST       | ENST00000389793     | p.Q1208H | c.3624G>T  | Verified   | TCT | CAG | TGT | 3 | G | T |
| TCGA-30-1891 | MAD1L1     | AF083811.1          | p.L269L  | c.807G>T   | Unverified | cac | ctg | cgg | 3 | G | T |
| TCGA-29-1711 | MAGEB3     | ENST00000378986     | p.V210L  | c.628G>T   | Unverified | ggc | gtg | atc | 1 | G | T |
| TCGA-29-1711 | MAGEB3     | ENST00000378986     | p.V210L  | c.628G>T   | Unverified | ggc | gtg | atc | 1 | G | T |
| TCGA-20-1683 | MAGEC1     | ENST00000285879     | p.Q582H  | c.1746G>T  | Unverified | cct | cag | agc | 3 | G | T |
| TCGA-20-1686 | MAGED2     | ENST00000375068     | p.G403V  | c.1208G>T  | Unverified | cct | ggg | ata | 2 | G | T |
| TCGA-20-1685 | MAN2A2     | ENST00000360468     | p.G1150V | c.3449G>T  | Unverified | TTG | GGT | TAG | 2 | G | T |
| TCGA-24-2289 | MAN2A2     | ENST00000360468     | p.E244D  | c.732G>T   | Unverified | CTG | GAG | ATT | 3 | G | T |
| TCGA-23-2077 | MAN2B1     | ENST00000221363     | p.V279V  | c.837G>T   | Verified   | CTG | GTG | GAG | 3 | G | T |
| TCGA-61-2094 | MAP1A      | ENST00000300231     | p.G1052G | c.3156G>T  | Unverified | CCA | GGG | CCT | 3 | G | T |
| TCGA-29-1711 | MAP1S      | ENST00000324096     | p.G815V  | c.2444G>T  | Unverified | GAG | GGC | TTT | 2 | G | T |
| TCGA-29-1711 | MAP1S      | ENST00000324096     | p.G815V  | c.2444G>T  | Unverified | GAG | GGC | TTT | 2 | G | T |
| TCGA-61-1906 | MAP2       | ENST00000360351     | p.A341S  | c.1021G>T  | Unverified | TTT | GCC | CCT | 1 | G | T |
| TCGA-61-1906 | MAP2       | ENST00000360351     | p.A341S  | c.1021G>T  | Unverified | TTT | GCC | CCT | 1 | G | T |
| TCGA-29-1770 | MAP3K13    | ENST00000424227     | p.E323*  | c.967G>T   | Unverified | CCA | GAG | GTG | 1 | G | T |
| TCGA-29-1770 | MAP3K13_E  | ENST00000424227     | p.E323*  | c.967G>T   | Unverified | CCA | GAG | GTG | 1 | G | T |
| TCGA-04-1338 | MAP3K7     | ENST00000369332     | p.G45V   | c.134G>T   | Verified   | aga | gga | gcc | 2 | G | T |
| TCGA-61-1907 | MAP4       | ENST00000360240     | p.D604Y  | c.1810G>T  | Unverified | GAG | GAT | TCC | 1 | G | T |
| TCGA-61-1907 | MAP4_ENST  | ENST00000395734_v68 | p.D604Y  | c.1810G>T  | Unverified | GAG | GAT | TCC | 1 | G | T |
| TCGA-13-0883 | MAP9       | ENST00000311277     | p.D325Y  | c.973G>T   | Verified   | GAT | GAT | GAC | 1 | G | T |
| TCGA-29-1785 | MAPRE2     | ENST00000300249     | p.?      | c.396+1G>T | Unverified | gat | aag | gta | 3 | G | T |



|              |           |                 |          |            |            |     |     |     |   |   |   |
|--------------|-----------|-----------------|----------|------------|------------|-----|-----|-----|---|---|---|
| TCGA-29-1785 | MAPRE2    | ENST00000300249 | p.?      | c.396+1G>T | Unverified | gat | aag | gta | 3 | G | T |
| TCGA-09-2050 | MARCO     | ENST00000327097 | p.R332L  | c.995G>T   | Verified   | GGG | CGA | GCA | 2 | G | T |
| TCGA-23-1120 | MARK4     | ENST00000300843 | p.E350D  | c.1050G>T  | Unverified | AAA | GAG | TCC | 3 | G | T |
| TCGA-04-1342 | MARS2     | ENST00000282276 | p.R489S  | c.1467G>T  | Unverified | CAA | AGG | CAT | 3 | G | T |
| TCGA-23-1110 | MASP1     | ENST00000337774 | p.V240V  | c.720G>T   | Verified   | GAG | GTG | CCC | 3 | G | T |
| TCGA-29-1691 | MAST2_ENS | ENST00000361297 | p.R530R  | c.1590G>T  | Unverified | GTG | CGG | CAC | 3 | G | T |
| TCGA-04-1638 | MAST4_ENS | ENST00000403625 | p.G1236V | c.3707G>T  | Unverified | ACT | GGA | CCA | 2 | G | T |
| TCGA-13-1507 | MATN2     | ENST00000520016 | p.E743*  | c.2227G>T  | Verified   | TTT | GAG | AGA | 1 | G | T |
| TCGA-24-0979 | MBD5      | ENST00000407073 | p.D1082Y | c.3244G>T  | Verified   | GGT | GAT | GCT | 1 | G | T |
| TCGA-30-1856 | MBNL1     | ENST00000282486 | p.A132S  | c.394G>T   | Unverified | GCC | GCC | TTT | 1 | G | T |
| TCGA-30-1856 | MBNL1_ENS | ENST00000324196 | p.A132S  | c.394G>T   | Unverified | GCC | GCC | TTT | 1 | G | T |
| TCGA-23-1110 | MBTD1     | ENST00000393180 | p.G249V  | c.746G>T   | Verified   | GAC | GGA | TTC | 2 | G | T |
| TCGA-13-0900 | MCM10     | ENST00000361282 | p.S237I  | c.710G>T   | Verified   | GGA | AGT | TCT | 2 | G | T |
| TCGA-13-1499 | MDN1      | ENST00000369393 | p.G2433V | c.7298G>T  | Verified   | ATG | GGA | CTG | 2 | G | T |
| TCGA-13-0893 | MED26     | ENST00000263390 | p.V256V  | c.768G>T   | Verified   | AGG | GTG | GAC | 3 | G | T |
| TCGA-24-1104 | MED4      | ENST00000258648 | p.G60V   | c.179G>T   | Verified   | gct | gga | gag | 2 | G | T |
| TCGA-04-1530 | MEF2C     | ENST00000514028 | p.D432Y  | c.1294G>T  | Unverified | tac | gac | ggg | 1 | G | T |
| TCGA-24-2289 | MEFV      | ENST00000219596 | p.S312I  | c.935G>T   | Unverified | GCG | AGT | CCC | 2 | G | T |
| TCGA-61-2102 | MEOX2     | ENST00000262041 | p.A143A  | c.429G>T   | Verified   | GCC | GCG | TGC | 3 | G | T |
| TCGA-30-1855 | MEP1B     | ENST00000269202 | p.Q631H  | c.1893G>T  | Unverified | TGC | CAG | TCA | 3 | G | T |
| TCGA-13-0920 | METTL19   | ENST00000285635 | p.R45M   | c.134G>T   | Verified   | GCC | AGG | TCT | 2 | G | T |
| TCGA-23-1114 | MFN2      | ENST00000235329 | p.W626L  | c.1877G>T  | Unverified | GTG | TGG | AAG | 2 | G | T |
| TCGA-23-1114 | MFN2_ENST | ENST00000376337 | p.W324L  | c.971G>T   | Unverified | GTG | TGG | AAG | 2 | G | T |
| TCGA-23-1124 | MFSD11    | ENST00000336509 | p.G422V  | c.1265G>T  | Verified   | TTT | GGG | TTT | 2 | G | T |
| TCGA-13-0903 | MFSD2B    | ENST00000406420 | p.A93S   | c.277G>T   | Verified   | GCG | GCT | GCT | 1 | G | T |
| TCGA-29-1762 | MFSD6     | ENST00000392328 | p.M379I  | c.1137G>T  | Unverified | CTC | ATG | ACC | 3 | G | T |
| TCGA-13-1512 | MGC99813  | ENST00000373883 | p.V113L  | c.337G>T   | Verified   | CTA | GTG | CGC | 1 | G | T |
| TCGA-13-0887 | MGEA5     | ENST00000361464 | p.E898*  | c.2692G>T  | Verified   | TTT | GAA | ATT | 1 | G | T |
| TCGA-09-2051 | MGST1     | ENST00000396207 | p.L95F   | c.285G>T   | Unverified | TCC | TTG | AGT | 3 | G | T |
| TCGA-04-1342 | MICALL1   | ENST00000215957 | p.E346*  | c.1036G>T  | Unverified | CAC | GAA | CTG | 1 | G | T |
| TCGA-04-1655 | MKNK1     | ENST00000371946 | p.R32R   | c.96G>T    | Unverified | aag | cgg | agg | 3 | G | T |
| TCGA-04-1331 | MKX       | ENST00000375790 | p.G180V  | c.539G>T   | Verified   | GAA | GGG | GGC | 2 | G | T |
| TCGA-13-0885 | MLL4      | ENST00000222270 | p.V2041V | c.6123G>T  | Verified   | CCT | GTG | ACT | 3 | G | T |
| TCGA-23-1124 | MLXIP     | ENST00000319080 | p.W832L  | c.2495G>T  | Verified   | AAT | TGG | AAG | 2 | G | T |

|              |           |                 |         |            |            |     |     |     |   |   |   |
|--------------|-----------|-----------------|---------|------------|------------|-----|-----|-----|---|---|---|
| TCGA-04-1342 | MMEL1     | ENST00000288709 | p.Q581H | c.1743G>T  | Unverified | CTC | CAG | CCC | 3 | G | T |
| TCGA-61-1915 | MMP13     | ENST00000260302 | p.A385S | c.1153G>T  | Unverified | gca | gct | gtt | 1 | G | T |
| TCGA-10-0930 | MMP8      | ENST00000236826 | p.R292L | c.875G>T   | Verified   | ctc | cgt | gga | 2 | G | T |
| TCGA-10-0930 | MMP8      | ENST00000236826 | p.R292L | c.875G>T   | Verified   | ctc | cgt | gga | 2 | G | T |
| TCGA-13-0904 | MMRN1     | ENST00000394980 | p.E64*  | c.190G>T   | Verified   | GCG | GAG | ATA | 1 | G | T |
| TCGA-24-2289 | MMRN1     | ENST00000394980 | p.V168F | c.502G>T   | Unverified | GGC | GTT | GGA | 1 | G | T |
| TCGA-23-1120 | MOCS3     | ENST00000244051 | p.V176L | c.526G>T   | Unverified | GTG | GTG | GCT | 1 | G | T |
| TCGA-23-1110 | MORC1     | ENST00000232603 | p.?     | c.223+1G>T | Verified   | CCT | GAG | GAA | 1 | G | T |
| TCGA-13-1509 | MOV10L1   | ENST00000262794 | p.V570F | c.1708G>T  | Verified   | GAG | GTC | CCA | 1 | G | T |
| TCGA-13-0923 | MPDZ      | NM_003829.1     | p.G100V | c.299G>T   | Verified   | aat | ggg | aat | 2 | G | T |
| TCGA-24-2267 | MPDZ      | NM_003829.1     | p.G777G | c.2331G>T  | Verified   | tca | ggg | act | 3 | G | T |
| TCGA-09-2050 | MPG       | ENST00000219431 | p.D211Y | c.631G>T   | Verified   | AAG | GAC | CGC | 1 | G | T |
| TCGA-23-1124 | MPI       | ENST00000352410 | p.G265V | c.794G>T   | Verified   | CCT | GGG | GAG | 2 | G | T |
| TCGA-29-1766 | MPP4      | ENST00000409474 | p.E314* | c.940G>T   | Unverified | CGG | GAA | TTC | 1 | G | T |
| TCGA-29-1766 | MPP4_ENST | ENST00000409474 | p.E314* | c.940G>T   | Unverified | CGG | GAA | TTC | 1 | G | T |
| TCGA-24-2035 | MPRIP     | ENST00000341712 | p.P522P | c.1566G>T  | Unverified | GAG | CCG | GAC | 3 | G | T |
| TCGA-23-1122 | MRGPRX3   | ENST00000396275 | p.V190F | c.568G>T   | Verified   | GTG | GTT | CTC | 1 | G | T |
| TCGA-13-0885 | MRPL30    | ENST00000338148 | p.M134I | c.402G>T   | Verified   | AAC | ATG | TCT | 3 | G | T |
| TCGA-24-0979 | MRPL49    | ENST00000279242 | p.L132L | c.396G>T   | Unverified | CTG | CTG | GGG | 3 | G | T |
| TCGA-25-1313 | MRPS18B   | ENST00000259873 | p.G132C | c.394G>T   | Verified   | ACG | GGT | ATC | 1 | G | T |
| TCGA-09-2056 | MS4A1     | ENST00000389939 | p.G68V  | c.203G>T   | Verified   | GGG | GGT | CTT | 2 | G | T |
| TCGA-13-0885 | MS4A1     | ENST00000389939 | p.G60G  | c.180G>T   | Verified   | AAT | GGG | CTC | 3 | G | T |
| TCGA-24-1435 | MS4A15_EN | ENST00000405633 | p.L60F  | c.180G>T   | Verified   | GAC | TTG | CGG | 3 | G | T |
| TCGA-13-0906 | MS4A3     | ENST00000278865 | p.G95C  | c.283G>T   | Verified   | TGG | GGT | GCT | 1 | G | T |
| TCGA-13-0903 | MSH4      | ENST00000263187 | p.E742* | c.2224G>T  | Verified   | aaa | gag | ata | 1 | G | T |
| TCGA-20-0990 | MSH5      | NM_025259.3     | p.M583I | c.1749G>T  | Verified   | ctg | atg | gaa | 3 | G | T |
| TCGA-24-1464 | MSH5_ENST | ENST00000375742 | p.?     | c.863+1G>T | Verified   | CTC | AGG | CTA | 2 | G | T |
| TCGA-13-0883 | MST1R     | ENST00000296474 | p.V977F | c.2929G>T  | Verified   | CTG | GTC | TTC | 1 | G | T |
| TCGA-09-1665 | MST1R     | ENST00000296474 | p.R669R | c.2007G>T  | Verified   | TTC | CGG | GTA | 3 | G | T |
| TCGA-29-1775 | MSTN      | ENST00000260950 | p.T115T | c.345G>T   | Unverified | aca | acg | gaa | 3 | G | T |
| TCGA-30-1891 | MT1B      | ENST00000334346 | p.A14S  | c.40G>T    | Unverified | TGT | GCC | TGC | 1 | G | T |
| TCGA-25-2400 | MTA2      | ENST00000278823 | p.E113D | c.339G>T   | Verified   | AAT | GAG | ACA | 3 | G | T |
| TCGA-23-1122 | MTFMT     | ENST00000220058 | p.D326Y | c.976G>T   | Verified   | AAG | GAT | GGT | 1 | G | T |
| TCGA-13-0893 | MTHFD2L   | ENST00000325278 | p.S27I  | c.80G>T    | Verified   | CTC | AGT | ATA | 2 | G | T |

|              |           |                 |          |            |            |     |     |     |   |   |   |
|--------------|-----------|-----------------|----------|------------|------------|-----|-----|-----|---|---|---|
| TCGA-24-0979 | MTIF2     | ENST00000394600 | p.D350Y  | c.1048G>T  | Verified   | GCA | GAT | CCC | 1 | G | T |
| TCGA-25-2398 | MTIF3     | ENST00000381116 | p.L161L  | c.483G>T   | Verified   | GAA | CTG | ATT | 3 | G | T |
| TCGA-24-1604 | MTMR12    | ENST00000382142 | p.L215L  | c.645G>T   | Unverified | gaa | ctg | gaa | 3 | G | T |
| TCGA-61-1907 | MTOR      | ENST00000361445 | p.V1461L | c.4381G>T  | Unverified | ctt | gtg | gcc | 1 | G | T |
| TCGA-04-1342 | MTRR      | ENST00000264668 | p.R612S  | c.1836G>T  | Verified   | GAT | AGG | GAT | 3 | G | T |
| TCGA-23-1032 | MTUS2_ENS | ENST00000431530 | p.R160M  | c.479G>T   | Verified   | AAA | AGG | GAT | 2 | G | T |
| TCGA-24-2024 | MUC16     | ENST00000397910 | p.W1384C | c.4152G>T  | Verified   | GCA | TGG | ACC | 3 | G | T |
| TCGA-61-2012 | MUC16     | ENST00000397910 | p.L3262L | c.9786G>T  | Verified   | CAC | CTG | CCC | 3 | G | T |
| TCGA-23-1120 | MUC17     | ENST00000306151 | p.E4380* | c.13138G>T | Verified   | GGG | GAG | ACC | 1 | G | T |
| TCGA-61-1913 | MUC17     | ENST00000306151 | p.S1763I | c.5288G>T  | Unverified | CTC | AGT | TCT | 2 | G | T |
| TCGA-61-2102 | MUC17     | ENST00000306151 | p.G1265V | c.3794G>T  | Verified   | GAA | GGT | ACC | 2 | G | T |
| TCGA-29-1695 | MUC20     | ENST00000447234 | p.R649S  | c.1947G>T  | Unverified | ACG | AGG | CCG | 3 | G | T |
| TCGA-29-1695 | MUC20_ENS | ENST00000381954 | p.R460S  | c.1380G>T  | Unverified | ACG | AGG | CCG | 3 | G | T |
| TCGA-25-1313 | MUC4      | ENST00000346145 | p.E395*  | c.1183G>T  | Unverified | CGT | GAA | GGC | 1 | G | T |
| TCGA-25-1313 | MUC4_ENS  | ENST00000405167 | p.E4503* | c.13507G>T | Unverified | CGT | GAA | GGC | 1 | G | T |
| TCGA-25-2401 | MX2       | ENST00000330714 | p.E217D  | c.651G>T   | Verified   | CCT | GAG | GTT | 3 | G | T |
| TCGA-13-1496 | MXRA5     | ENST00000381114 | p.E325D  | c.975G>T   | Verified   | GAC | GAG | CAC | 3 | G | T |
| TCGA-61-2094 | MYBBP1A   | ENST00000254718 | p.L193F  | c.579G>T   | Unverified | ACA | TTG | CAG | 3 | G | T |
| TCGA-04-1337 | MYH1      | ENST00000226207 | p.D1656Y | c.4966G>T  | Verified   | AAG | GAT | ACC | 1 | G | T |
| TCGA-09-2044 | MYH14     | ENST00000301415 | p.V1149L | c.3445G>T  | Unverified | CGT | GTG | GCC | 1 | G | T |
| TCGA-29-1777 | MYH2      | ENST00000245503 | p.E1078* | c.3232G>T  | Unverified | AAT | GAG | AAA | 1 | G | T |
| TCGA-13-0885 | MYH4      | ENST00000255381 | p.E1709D | c.5127G>T  | Verified   | CAA | GAG | CTT | 3 | G | T |
| TCGA-13-1510 | MYH4      | ENST00000255381 | p.K1899N | c.5697G>T  | Verified   | GCC | AAG | TTC | 3 | G | T |
| TCGA-61-1737 | MYH9      | ENST00000216181 | p.A420S  | c.1258G>T  | Unverified | AAG | GCG | ACC | 1 | G | T |
| TCGA-13-1496 | MYO18B    | ENST00000335473 | p.R1254L | c.3761G>T  | Verified   | CTG | CGT | CTG | 2 | G | T |
| TCGA-30-1856 | MYO3A     | ENST00000265944 | p.E291D  | c.873G>T   | Unverified | ATT | GAG | GGC | 3 | G | T |
| TCGA-29-1764 | MYO7A     | ENST00000409709 | p.V1918L | c.5752G>T  | Unverified | GAA | GTG | GAG | 1 | G | T |
| TCGA-24-1463 | MYO7A     | ENST00000409709 | p.G1191V | c.3572G>T  | Verified   | CGG | GGC | TGG | 2 | G | T |
| TCGA-23-1031 | MYO7B     | ENST00000272666 | p.V1458L | c.4372G>T  | Unverified | CAG | GTG | CGG | 1 | G | T |
| TCGA-30-1891 | MYOC      | ENST00000037502 | p.W373L  | c.1118G>T  | Unverified | tct | tgg | ggt | 2 | G | T |
| TCGA-13-0923 | MYOM1     | ENST00000356443 | p.R31L   | c.92G>T    | Unverified | CAG | CGG | GAG | 2 | G | T |
| TCGA-23-1114 | MYOZ1     | ENST00000359322 | p.G146C  | c.436G>T   | Unverified | GGT | GGT | CCC | 1 | G | T |
| TCGA-24-2035 | MYRIP     | ENST00000302541 | p.Q57H   | c.171G>T   | Verified   | CAC | CAG | CAG | 3 | G | T |
| TCGA-13-1489 | MYST4     | ENST00000287239 | p.S1618I | c.4853G>T  | Verified   | CCA | AGT | GTC | 2 | G | T |

|              |           |                  |          |             |            |     |     |     |   |   |   |
|--------------|-----------|------------------|----------|-------------|------------|-----|-----|-----|---|---|---|
| TCGA-25-2042 | NARF      | NM_031968.1      | p.E238*  | c.712G>T    | Unverified | cag | gaa | agc | 1 | G | T |
| TCGA-13-0760 | NAT14     | ENST00000205194  | p.M158I  | c.474G>T    | Unverified | GGC | ATG | GGG | 3 | G | T |
| TCGA-29-1703 | NAV2      | ENST00000360655  | p.?      | c.4900+1G>T | Unverified | GAA | GAA | TCA | 1 | G | T |
| TCGA-23-1124 | NCAPD3    | ENST00000534548  | p.?      | c.4174+1G>T | Verified   | cag | gtg | tct | 1 | G | T |
| TCGA-61-1738 | NCK2      | ENST00000233154  | p.R28R   | c.84G>T     | Unverified | GAG | CGG | CTG | 3 | G | T |
| TCGA-61-1738 | NCK2      | ENST00000233154  | p.R28R   | c.84G>T     | Unverified | GAG | CGG | CTG | 3 | G | T |
| TCGA-61-1738 | NCK2_ENST | (ENST00000233154 | p.R28R   | c.84G>T     | Unverified | GAG | CGG | CTG | 3 | G | T |
| TCGA-61-1738 | NCK2_ENST | (ENST00000233154 | p.R28R   | c.84G>T     | Unverified | GAG | CGG | CTG | 3 | G | T |
| TCGA-61-1915 | NCKAP1L   | ENST00000293373  | p.R102R  | c.306G>T    | Unverified | TTT | CGG | GAT | 3 | G | T |
| TCGA-09-2051 | NCOA1     | ENST00000406961  | p.G131W  | c.391G>T    | Unverified | GAA | GGG | AGA | 1 | G | T |
| TCGA-13-0904 | NCOA3     | ENST00000371998  | p.D566Y  | c.1696G>T   | Verified   | cag | gat | tcc | 1 | G | T |
| TCGA-13-0714 | NDRG1     | ENST00000323851  | p.V17L   | c.49G>T     | Verified   | ttg | gtg | gag | 1 | G | T |
| TCGA-29-1691 | NDST2     | ENST00000309979  | p.M526I  | c.1578G>T   | Unverified | TTT | ATG | ACC | 3 | G | T |
| TCGA-29-1763 | NDST2     | ENST00000309979  | p.K860N  | c.2580G>T   | Unverified | TCG | AAG | CTG | 3 | G | T |
| TCGA-29-1766 | NEB       | ENST00000409198  | p.Q3994H | c.11982G>T  | Unverified | ATC | CAG | GCT | 3 | G | T |
| TCGA-29-1766 | NEB_ENSTO | (ENST00000397345 | p.Q5695H | c.17085G>T  | Unverified | ATC | CAG | GCT | 3 | G | T |
| TCGA-29-1766 | NEB_ENSTO | (ENST00000427231 | p.Q5695H | c.17085G>T  | Unverified | ATC | CAG | GCT | 3 | G | T |
| TCGA-61-1907 | NEDD1     | ENST00000266742  | p.V204L  | c.610G>T    | Unverified | AGT | GTA | CAC | 1 | G | T |
| TCGA-13-1497 | NEK10     | SU_NEK10         | p.D875Y  | c.2623G>T   | Verified   | aaa | gac | gaa | 1 | G | T |
| TCGA-24-2024 | NEK3      | NM_002498        | p.D413Y  | c.1237G>T   | Verified   | cct | gac | act | 1 | G | T |
| TCGA-04-1649 | NETO1     | ENST00000327305  | p.V236V  | c.708G>T    | Unverified | GCT | GTG | TAT | 3 | G | T |
| TCGA-04-1347 | NEUROD4   | ENST00000242994  | p.G320V  | c.959G>T    | Verified   | CAT | GGT | ATT | 2 | G | T |
| TCGA-61-2102 | NEXN      | ENST00000334785  | p.R42M   | c.125G>T    | Verified   | GCC | AGG | GAA | 2 | G | T |
| TCGA-13-0920 | NFE2L3    | ENST00000056233  | p.A299S  | c.895G>T    | Verified   | TCA | GCA | CAT | 1 | G | T |
| TCGA-29-1777 | NFX1      | ENST00000379540  | p.V211L  | c.631G>T    | Unverified | CCT | GTG | GGG | 1 | G | T |
| TCGA-04-1649 | NFYC      | ENST00000447388  | p.G176W  | c.526G>T    | Unverified | cct | ggg | cag | 1 | G | T |
| TCGA-04-1343 | NGEF      | ENST00000264051  | p.A286S  | c.856G>T    | Verified   | GAG | GCG | TCC | 1 | G | T |
| TCGA-23-1032 | NGFR      | ENST00000172229  | p.A355S  | c.1063G>T   | Verified   | TCT | GCG | GGG | 1 | G | T |
| TCGA-24-1469 | NINL      | ENST00000278886  | p.V253V  | c.759G>T    | Verified   | AAA | GTG | AGT | 3 | G | T |
| TCGA-09-2051 | NKX6-1    | ENST00000295886  | p.D331Y  | c.991G>T    | Unverified | CTG | GAT | CCC | 1 | G | T |
| TCGA-24-2267 | NLE1      | ENST00000442241  | p.W422C  | c.1266G>T   | Verified   | GCG | TGG | TCA | 3 | G | T |
| TCGA-24-1435 | NLRC4     | ENST00000360906  | p.V499L  | c.1495G>T   | Verified   | tct | gtg | gaa | 1 | G | T |
| TCGA-25-1326 | NLRC5     | ENST00000262510  | p.V1659F | c.4975G>T   | Unverified | CTC | GTT | CTT | 1 | G | T |
| TCGA-13-1481 | NLRC5     | ENST00000262510  | p.S1409I | c.4226G>T   | Verified   | GGC | AGT | GTC | 2 | G | T |

|              |           |                 |          |             |            |     |     |     |   |   |   |
|--------------|-----------|-----------------|----------|-------------|------------|-----|-----|-----|---|---|---|
| TCGA-04-1361 | NLRP13    | ENST00000342929 | p.M1027I | c.3081G>T   | Verified   | AAG | ATG | CTA | 3 | G | T |
| TCGA-04-1361 | NLRP13    | ENST00000342929 | p.M1027I | c.3081G>T   | Verified   | AAG | ATG | CTA | 3 | G | T |
| TCGA-24-1422 | NLRP5     | ENST00000390649 | p.G1157V | c.3470G>T   | Unverified | ATT | GGG | CTG | 2 | G | T |
| TCGA-23-1118 | NLRP8     | ENST00000291971 | p.?      | c.2381+1G>T | Verified   | CTC | AGG | TTG | 2 | G | T |
| TCGA-13-0920 | NMS       | ENST00000376865 | p.G113C  | c.337G>T    | Verified   | CGA | GGC | TCG | 1 | G | T |
| TCGA-23-1021 | NOL4      | ENST00000261592 | p.E44D   | c.132G>T    | Verified   | TCC | GAG | TCG | 3 | G | T |
| TCGA-61-1904 | NOL9      | ENST00000377705 | p.G593G  | c.1779G>T   | Unverified | AAT | GGG | CCC | 3 | G | T |
| TCGA-61-1900 | NONO      | ENST00000276079 | p.G448C  | c.1342G>T   | Unverified | att | ggt | gga | 1 | G | T |
| TCGA-61-1725 | NOP2      | ENST00000399466 | p.A367S  | c.1099G>T   | Unverified | GGA | GCC | TCC | 1 | G | T |
| TCGA-23-1120 | NOTCH2    | ENST00000256646 | p.A1340S | c.4018G>T   | Verified   | ggg | gca | agg | 1 | G | T |
| TCGA-24-1474 | NOTCH3    | ENST00000263388 | p.L1768L | c.5304G>T   | Unverified | GCA | CTG | ACA | 3 | G | T |
| TCGA-13-1501 | NOTUM     | ENST00000330917 | p.M395I  | c.1185G>T   | Unverified | GAG | ATG | AAC | 3 | G | T |
| TCGA-13-1501 | NOTUM     | ENST00000330917 | p.M395I  | c.1185G>T   | Unverified | GAG | ATG | AAC | 3 | G | T |
| TCGA-61-1740 | NPAS4     | ENST00000311034 | p.G432V  | c.1295G>T   | Unverified | CCA | GGA | GGC | 2 | G | T |
| TCGA-13-1497 | NPC1      | ENST00000269228 | p.A764A  | c.2292G>T   | Verified   | TTT | GCG | GGA | 3 | G | T |
| TCGA-13-1498 | NPHS1     | ENST00000378910 | p.G779*  | c.2335G>T   | Verified   | CTG | GGA | GAA | 1 | G | T |
| TCGA-24-2289 | NPHS1     | ENST00000378910 | p.G54W   | c.160G>T    | Unverified | TGT | GGG | GTC | 1 | G | T |
| TCGA-10-0930 | NPPB      | ENST00000376468 | p.E60*   | c.178G>T    | Verified   | GTG | GAG | CAG | 1 | G | T |
| TCGA-10-0930 | NPPB      | ENST00000376468 | p.E60*   | c.178G>T    | Verified   | GTG | GAG | CAG | 1 | G | T |
| TCGA-13-1481 | NPR2      | ENST00000342694 | p.V960F  | c.2878G>T   | Verified   | GGG | GTC | CAT | 1 | G | T |
| TCGA-29-1784 | NPSR1     | ENST00000360581 | p.E34*   | c.100G>T    | Unverified | ACT | GAA | GTG | 1 | G | T |
| TCGA-29-1784 | NPSR1_ENS | ENST00000359791 | p.E34*   | c.100G>T    | Unverified | ACT | GAA | GTG | 1 | G | T |
| TCGA-29-1691 | NR1I3     | ENST00000367983 | p.R306R  | c.918G>T    | Unverified | gat | cgg | ttt | 3 | G | T |
| TCGA-13-0760 | NR4A2     | ENST00000339562 | p.L410L  | c.1230G>T   | Verified   | ctc | ctg | act | 3 | G | T |
| TCGA-13-1481 | NR6A1     | ENST00000487099 | p.E282*  | c.844G>T    | Verified   | gca | gaa | cta | 1 | G | T |
| TCGA-24-1844 | NRBF2     | ENST00000277746 | p.G283V  | c.848G>T    | Unverified | AAA | GGA | TTT | 2 | G | T |
| TCGA-24-1846 | NRP1      | ENST00000265371 | p.R143I  | c.428G>T    | Unverified | AAG | AGA | GGT | 2 | G | T |
| TCGA-23-1029 | NRSN2     | ENST00000382285 | p.G140C  | c.418G>T    | Unverified | ATA | GGC | TGG | 1 | G | T |
| TCGA-25-2391 | NRXN2     | ENST00000377551 | p.G702G  | c.2106G>T   | Unverified | aat | ggg | ggc | 3 | G | T |
| TCGA-10-0930 | NSUN6     | ENST00000377304 | p.E25*   | c.73G>T     | Verified   | AAG | GAG | ATT | 1 | G | T |
| TCGA-10-0930 | NSUN6     | ENST00000377304 | p.E25*   | c.73G>T     | Verified   | AAG | GAG | ATT | 1 | G | T |
| TCGA-09-2050 | NUMA1     | ENST00000393695 | p.R985R  | c.2955G>T   | Verified   | ctg | cgg | gcc | 3 | G | T |
| TCGA-61-2009 | NUP210    | ENST00000254508 | p.A394S  | c.1180G>T   | Verified   | CCT | GCT | GAG | 1 | G | T |
| TCGA-04-1361 | NUP93     | ENST00000308159 | p.V421L  | c.1261G>T   | Verified   | CAA | GTG | TGT | 1 | G | T |

|              |           |                 |          |           |            |     |     |     |   |   |   |
|--------------|-----------|-----------------|----------|-----------|------------|-----|-----|-----|---|---|---|
| TCGA-04-1361 | NUP93     | ENST00000308159 | p.V421L  | c.1261G>T | Verified   | CAA | GTG | TGT | 1 | G | T |
| TCGA-24-1616 | NXPH2     | ENST00000272641 | p.G140*  | c.418G>T  | Verified   | AAT | GGA | ACC | 1 | G | T |
| TCGA-13-0923 | OBSCN     | SU_OBSCN.1      | p.G850W  | c.2548G>T | Verified   | gtg | ggg | acg | 1 | G | T |
| TCGA-13-0923 | OBSCN_ENS | ENST00000359599 | p.G850W  | c.2548G>T | Verified   | GTG | GGG | ACG | 1 | G | T |
| TCGA-04-1336 | OC90      | XM_070277.6     | p.E255*  | c.763G>T  | Verified   | cct | gag | gag | 1 | G | T |
| TCGA-04-1336 | OC90_ENST | ENST00000262283 | p.E493*  | c.1477G>T | Verified   | CCT | GAG | GAG | 1 | G | T |
| TCGA-13-0791 | OCA2      | ENST00000354638 | p.V833L  | c.2497G>T | Verified   | CAT | GTG | GTG | 1 | G | T |
| TCGA-13-0884 | ODZ1      | ENST00000371130 | p.E2290D | c.6870G>T | Verified   | TCG | GAG | ATT | 3 | G | T |
| TCGA-25-2392 | OR10A7    | ENST00000326258 | p.R234L  | c.701G>T  | Verified   | GGC | CGC | CAG | 2 | G | T |
| TCGA-30-1718 | OR10G8    | ENST00000431524 | p.V271L  | c.811G>T  | Unverified | GTT | GTG | GCC | 1 | G | T |
| TCGA-24-2290 | OR10G8    | ENST00000431524 | p.V294V  | c.882G>T  | Verified   | GAG | GTG | AAG | 3 | G | T |
| TCGA-24-2290 | OR10G8    | ENST00000431524 | p.V294V  | c.882G>T  | Verified   | GAG | GTG | AAG | 3 | G | T |
| TCGA-23-1114 | OR10H1    | ENST00000334920 | p.L33L   | c.99G>T   | Unverified | CTG | CTG | ATG | 3 | G | T |
| TCGA-23-1123 | OR11H12   | ENST00000550708 | p.K95N   | c.285G>T  | Verified   | CCC | AAG | ATG | 3 | G | T |
| TCGA-23-1123 | OR11H12   | ENST00000550708 | p.K95N   | c.285G>T  | Verified   | CCC | AAG | ATG | 3 | G | T |
| TCGA-13-1481 | OR13C5    | ENST00000374779 | p.M144I  | c.432G>T  | Verified   | CCC | ATG | GCA | 3 | G | T |
| TCGA-24-2024 | OR1N2     | ENST00000373688 | p.W240L  | c.719G>T  | Verified   | TTC | TGG | GCT | 2 | G | T |
| TCGA-13-1509 | OR2F1     | ENST00000392899 | p.W149C  | c.447G>T  | Verified   | TCC | TGG | GTC | 3 | G | T |
| TCGA-23-1116 | OR2M5     | ENST00000366476 | p.L30L   | c.90G>T   | Verified   | TTT | CTG | GTC | 3 | G | T |
| TCGA-13-1498 | OR4A13P   | ENST00000314689 | p.G73V   | c.218G>T  | Verified   | TGT | GGC | CCC | 2 | G | T |
| TCGA-30-1855 | OR4C11    | ENST00000302231 | p.V144F  | c.430G>T  | Unverified | ATT | GTT | CTT | 1 | G | T |
| TCGA-04-1652 | OR4C12    | ENST00000335238 | p.D68Y   | c.202G>T  | Unverified | ATA | GAC | ACA | 1 | G | T |
| TCGA-04-1652 | OR4C12    | ENST00000335238 | p.D68Y   | c.202G>T  | Unverified | ATA | GAC | ACA | 1 | G | T |
| TCGA-61-2012 | OR4C13    | ENST00000555099 | p.A117S  | c.349G>T  | Verified   | ATG | GCC | TAT | 1 | G | T |
| TCGA-61-1910 | OR4E2     | ENST00000408935 | p.A236S  | c.706G>T  | Unverified | AAA | GCC | CTG | 1 | G | T |
| TCGA-13-0903 | OR4L1     | ENST00000315683 | p.R302L  | c.905G>T  | Verified   | TTA | CGG | TTC | 2 | G | T |
| TCGA-61-1895 | OR4S2     | ENST00000312422 | p.L45L   | c.135G>T  | Unverified | ATG | CTG | ACA | 3 | G | T |
| TCGA-23-1022 | OR51E2    | ENST00000396950 | p.R301L  | c.902G>T  | Verified   | ACA | CGG | GTG | 2 | G | T |
| TCGA-24-2280 | OR52N5    | ENST00000317093 | p.E120*  | c.358G>T  | Unverified | GTG | GAG | TCT | 1 | G | T |
| TCGA-24-2267 | OR5B2     | ENST00000302581 | p.K78N   | c.234G>T  | Verified   | CCC | AAG | GTC | 3 | G | T |
| TCGA-29-1781 | OR5H1     | ENST00000354565 | p.A237S  | c.709G>T  | Unverified | AAA | GCC | TTT | 1 | G | T |
| TCGA-25-2042 | OR5R1     | ENST00000312253 | p.Q232H  | c.696G>T  | Verified   | ACT | CAG | GGG | 3 | G | T |
| TCGA-29-1763 | OR5V1     | ENST00000377154 | p.C241F  | c.722G>T  | Unverified | ACA | TGT | GCC | 2 | G | T |
| TCGA-30-1718 | OR7G3     | ENST00000305444 | p.V276V  | c.828G>T  | Unverified | TCA | GTG | ATG | 3 | G | T |

|              |           |                 |          |             |            |     |     |     |   |   |   |
|--------------|-----------|-----------------|----------|-------------|------------|-----|-----|-----|---|---|---|
| TCGA-23-1022 | OR8U1     | ENST00000302270 | p.M108I  | c.324G>T    | Verified   | TTC | ATG | ATA | 3 | G | T |
| TCGA-09-1665 | OXCT1     | ENST00000196371 | p.G62V   | c.185G>T    | Verified   | GTT | GGT | GGT | 2 | G | T |
| TCGA-36-1577 | OXSR1_ENS | ENST00000311806 | p.V201F  | c.601G>T    | Unverified | CAG | GTC | CGT | 1 | G | T |
| TCGA-13-1510 | P2RY12    | ENST00000302632 | p.R231S  | c.693G>T    | Unverified | CCC | AGG | AAA | 3 | G | T |
| TCGA-13-1497 | P2RY6     | ENST00000393590 | p.A280S  | c.838G>T    | Verified   | TTT | GCA | GCG | 1 | G | T |
| TCGA-20-1686 | PADI1     | ENST00000375471 | p.E244*  | c.730G>T    | Unverified | GGG | GAG | CAG | 1 | G | T |
| TCGA-13-0924 | PAGE2     | ENST00000374968 | p.E74*   | c.220G>T    | Verified   | CAG | GAA | CTG | 1 | G | T |
| TCGA-13-1497 | PAGE2     | ENST00000374968 | p.G65W   | c.193G>T    | Verified   | CAA | GGG | CCT | 1 | G | T |
| TCGA-25-2401 | PAIP1     | ENST00000306846 | p.D260Y  | c.778G>T    | Verified   | GGG | GAT | GAA | 1 | G | T |
| TCGA-24-1469 | PAK3      | ENST00000446737 | p.R49L   | c.146G>T    | Verified   | ctt | cgc | tct | 2 | G | T |
| TCGA-13-0913 | PAK3      | ENST00000446737 | p.W339C  | c.1017G>T   | Verified   | cta | tgg | gta | 3 | G | T |
| TCGA-13-1481 | PAPD4     | ENST00000296783 | p.A442S  | c.1324G>T   | Verified   | ACA | GCC | AGA | 1 | G | T |
| TCGA-13-0903 | PAPPA2    | ENST00000367662 | p.V1020L | c.3058G>T   | Verified   | GGG | GTG | AAA | 1 | G | T |
| TCGA-13-0793 | PAPPA2    | ENST00000367662 | p.G1148V | c.3443G>T   | Verified   | GAA | GGT | TTC | 2 | G | T |
| TCGA-13-0795 | PARP14    | ENST00000310276 | p.L1209L | c.3627G>T   | Verified   | TTT | CTG | CCT | 3 | G | T |
| TCGA-25-1313 | PAX6      | ENST00000419022 | p.G190V  | c.569G>T    | Verified   | gat | ggc | tgc | 2 | G | T |
| TCGA-23-1029 | PCDHB2    | ENST00000194155 | p.V777F  | c.2329G>T   | Unverified | TTC | GTT | GCT | 1 | G | T |
| TCGA-25-1313 | PCDHB2    | ENST00000194155 | p.P11P   | c.33G>T     | Verified   | GTT | CCG | AAA | 3 | G | T |
| TCGA-61-1725 | PCDHB7    | ENST00000231137 | p.V232F  | c.694G>T    | Unverified | CTG | GTT | CTA | 1 | G | T |
| TCGA-29-1696 | PCDHGA10  | ENST00000398610 | p.A641A  | c.1923G>T   | Unverified | GAC | GCG | CTC | 3 | G | T |
| TCGA-29-1696 | PCDHGA10  | ENST00000398610 | p.A641A  | c.1923G>T   | Unverified | GAC | GCG | CTC | 3 | G | T |
| TCGA-61-1895 | PCDHGA10  | ENST00000398610 | p.V596V  | c.1788G>T   | Unverified | GTG | GTG | GCG | 3 | G | T |
| TCGA-61-1910 | PCDHGB6   | ENST00000520790 | p.A472S  | c.1414G>T   | Unverified | ATT | GCG | CAA | 1 | G | T |
| TCGA-13-0893 | PCSK5     | ENST00000376752 | p.Q816H  | c.2448G>T   | Verified   | GTG | CAG | AGC | 3 | G | T |
| TCGA-25-1326 | PCSK9     | ENST00000302118 | p.R167L  | c.500G>T    | Verified   | TAC | CGG | GCG | 2 | G | T |
| TCGA-29-1777 | PDE1C     | ENST00000396184 | p.V210F  | c.628G>T    | Unverified | CTT | GTC | TCA | 1 | G | T |
| TCGA-29-1777 | PDE1C_ENS | ENST00000396191 | p.V210F  | c.628G>T    | Unverified | CTT | GTC | TCA | 1 | G | T |
| TCGA-29-1777 | PDE1C_ENS | ENST00000396193 | p.V270F  | c.808G>T    | Unverified | CTT | GTC | TCA | 1 | G | T |
| TCGA-23-2078 | PDE2A     | ENST00000334456 | p.?      | c.1183-1G>T | Verified   | CAG | GCT | CTT | 1 | G | T |
| TCGA-13-0905 | PDE4B     | ENST00000329654 | p.S417S  | c.1251G>T   | Verified   | CAG | TCG | ACC | 3 | G | T |
| TCGA-13-0905 | PDE4B_ENS | ENST00000423207 | p.S402S  | c.1206G>T   | Verified   | CAG | TCG | ACC | 3 | G | T |
| TCGA-24-2024 | PDE4DIP   | ENST00000369354 | p.S1389S | c.4167G>T   | Verified   | TAT | TCG | TCT | 3 | G | T |
| TCGA-23-1029 | PDE6C     | ENST00000371447 | p.L179L  | c.537G>T    | Unverified | AAC | CTG | CTG | 3 | G | T |
| TCGA-13-1489 | PDIA3     | ENST00000300289 | p.L254F  | c.762G>T    | Verified   | GAT | TTG | ATA | 3 | G | T |

|              |            |                 |          |            |            |     |     |     |   |   |   |
|--------------|------------|-----------------|----------|------------|------------|-----|-----|-----|---|---|---|
| TCGA-25-2392 | PDLIM1     | ENST00000329399 | p.G171V  | c.512G>T   | Unverified | AGC | GGG | GTG | 2 | G | T |
| TCGA-61-1906 | PDP1       | ENST00000297598 | p.V430F  | c.1288G>T  | Unverified | gtg | gtt | agg | 1 | G | T |
| TCGA-61-1906 | PDP1       | ENST00000297598 | p.V430F  | c.1288G>T  | Unverified | gtg | gtt | agg | 1 | G | T |
| TCGA-61-1906 | PDP1_ENST  | ENST00000396200 | p.V455F  | c.1363G>T  | Unverified | GTG | GTT | AGG | 1 | G | T |
| TCGA-61-1906 | PDP1_ENST  | ENST00000396200 | p.V455F  | c.1363G>T  | Unverified | GTG | GTT | AGG | 1 | G | T |
| TCGA-24-1464 | PDS5B      | ENST00000315596 | p.L999F  | c.2997G>T  | Verified   | CTT | TTG | GCA | 3 | G | T |
| TCGA-24-1847 | PDYN       | ENST00000217305 | p.K235N  | c.705G>T   | Unverified | TTC | AAG | GTG | 3 | G | T |
| TCGA-09-1674 | PDZD7      | ENST00000370215 | p.R476L  | c.1427G>T  | Unverified | GGG | CGG | CAG | 2 | G | T |
| TCGA-09-1674 | PDZD7_ENS  | ENST00000393462 | p.R476L  | c.1427G>T  | Unverified | GGG | CGG | CAG | 2 | G | T |
| TCGA-13-1488 | PDZRN4     | ENST00000539469 | p.K378N  | c.1134G>T  | Verified   | TGC | AAG | ATT | 3 | G | T |
| TCGA-61-1998 | PEG3       | ENST00000326441 | p.G1266C | c.3796G>T  | Verified   | CCA | GGC | TTA | 1 | G | T |
| TCGA-13-1408 | PELI1      | ENST00000358912 | p.G348*  | c.1042G>T  | Verified   | CTT | GGA | TGT | 1 | G | T |
| TCGA-61-2012 | PER1       | ENST00000317276 | p.A712A  | c.2136G>T  | Verified   | AAG | GCG | GAG | 3 | G | T |
| TCGA-29-1702 | PFAS       | ENST00000314666 | p.A984S  | c.2950G>T  | Unverified | GAG | GCC | GGG | 1 | G | T |
| TCGA-13-0923 | PFKFB2     | ENST00000367080 | p.A109S  | c.325G>T   | Verified   | GTG | GCG | CTG | 1 | G | T |
| TCGA-09-2056 | PGK2       | ENST00000304801 | p.A102S  | c.304G>T   | Verified   | GGC | GCA | GAA | 1 | G | T |
| TCGA-04-1542 | PGLYRP2    | ENST00000340880 | p.V111L  | c.331G>T   | Verified   | GTG | GTG | CTG | 1 | G | T |
| TCGA-13-1507 | PGM5       | ENST00000396396 | p.V357L  | c.1069G>T  | Verified   | CCT | GTA | TAT | 1 | G | T |
| TCGA-13-0807 | PHEX       | ENST00000379374 | p.?      | c.933+1G>T | Verified   | CCC | CAG | TTC | 3 | G | T |
| TCGA-24-1464 | PHF20L1    | ENST00000337920 | p.G215*  | c.643G>T   | Verified   | TTT | GGA | CTT | 1 | G | T |
| TCGA-29-1691 | PIAS2      | ENST00000398654 | p.D204Y  | c.610G>T   | Unverified | AGA | GAT | TAT | 1 | G | T |
| TCGA-29-1691 | PIAS2_ENST | ENST00000324794 | p.D204Y  | c.610G>T   | Unverified | AGA | GAT | TAT | 1 | G | T |
| TCGA-13-0714 | PIGM       | ENST00000368090 | p.T237T  | c.711G>T   | Verified   | ctc | acg | ttt | 3 | G | T |
| TCGA-61-2012 | PIGR       | ENST00000356495 | p.K577N  | c.1731G>T  | Verified   | GCG | AAG | GCA | 3 | G | T |
| TCGA-13-1488 | PIGV       | ENST00000374145 | p.S244S  | c.732G>T   | Verified   | CTG | TCG | GTG | 3 | G | T |
| TCGA-61-1738 | PIK3CA     | NM_006218.1     | p.R115L  | c.344G>T   | Unverified | aat | cga | gaa | 2 | G | T |
| TCGA-61-1738 | PIK3CA     | NM_006218.1     | p.R115L  | c.344G>T   | Unverified | aat | cga | gaa | 2 | G | T |
| TCGA-61-1738 | PIK3CA_ENS | ENST00000263967 | p.R115L  | c.344G>T   | Unverified | AAT | CGA | GAA | 2 | G | T |
| TCGA-61-1738 | PIK3CA_ENS | ENST00000263967 | p.R115L  | c.344G>T   | Unverified | AAT | CGA | GAA | 2 | G | T |
| TCGA-13-0792 | PIK3CG     | ENST00000440650 | p.A445S  | c.1333G>T  | Unverified | AAG | GCC | TCT | 1 | G | T |
| TCGA-13-0795 | PIP4K2B    | ENST00000269554 | p.V157L  | c.469G>T   | Verified   | gac | gtg | gcg | 1 | G | T |
| TCGA-61-1895 | PKD2L1     | ENST00000318222 | p.V399L  | c.1195G>T  | Unverified | ATT | GTG | GCT | 1 | G | T |
| TCGA-24-1469 | PKHD1      | ENST00000371117 | p.A2521S | c.7561G>T  | Verified   | CAT | GCA | GCA | 1 | G | T |
| TCGA-13-0920 | PKHD1      | ENST00000371117 | p.R1390R | c.4170G>T  | Verified   | CCT | CGG | ATA | 3 | G | T |



|              |            |                 |          |            |            |     |     |     |   |   |   |
|--------------|------------|-----------------|----------|------------|------------|-----|-----|-----|---|---|---|
| TCGA-09-2049 | PKLR       | ENST00000342741 | p.R289L  | c.866G>T   | Verified   | GTG | CGG | AAA | 2 | G | T |
| TCGA-13-0906 | PKN1       | ENST00000242783 | p.E764D  | c.2292G>T  | Unverified | AAG | GAG | GGG | 3 | G | T |
| TCGA-24-2289 | PKP1       | ENST00000367324 | p.R317M  | c.950G>T   | Unverified | TTC | AGG | AGC | 2 | G | T |
| TCGA-24-0975 | PLA2G2F    | ENST00000375102 | p.G30V   | c.89G>T    | Verified   | TTC | GGG | GCC | 2 | G | T |
| TCGA-29-2427 | PLAC8      | ENST00000311507 | p.?      | c.119-1G>T | Verified   | GTC | TGT | CTC | 2 | G | T |
| TCGA-61-2009 | PLAU       | ENST00000372764 | p.C91F   | c.272G>T   | Verified   | CCC | TGC | CTG | 2 | G | T |
| TCGA-13-0886 | PLB1       | ENST00000327757 | p.R890I  | c.2669G>T  | Unverified | CAT | AGA | GAG | 2 | G | T |
| TCGA-23-1123 | PLCXD3     | ENST00000377801 | p.E316*  | c.946G>T   | Verified   | gat | gaa | gga | 1 | G | T |
| TCGA-23-1123 | PLCXD3     | ENST00000377801 | p.E316*  | c.946G>T   | Verified   | gat | gaa | gga | 1 | G | T |
| TCGA-23-1124 | PLCZ1      | ENST00000266505 | p.G592C  | c.1774G>T  | Verified   | atg | ggt | gag | 1 | G | T |
| TCGA-04-1336 | PLD5       | ENST00000366545 | p.W191L  | c.572G>T   | Verified   | ACC | TGG | TCC | 2 | G | T |
| TCGA-10-0930 | PLEC       | ENST00000322810 | p.R3439M | c.10316G>T | Verified   | GAG | AGG | CTG | 2 | G | T |
| TCGA-10-0930 | PLEC       | ENST00000322810 | p.R3439M | c.10316G>T | Verified   | GAG | AGG | CTG | 2 | G | T |
| TCGA-24-1846 | PLEKHA5    | ENST00000299275 | p.Q747H  | c.2241G>T  | Unverified | GTT | CAG | ACG | 3 | G | T |
| TCGA-24-1846 | PLEKHA5_EN | ENST00000429027 | p.Q850H  | c.2550G>T  | Unverified | GTT | CAG | ACG | 3 | G | T |
| TCGA-13-1507 | PLEKHB1    | ENST00000354190 | p.L51L   | c.153G>T   | Verified   | acc | ctg | gga | 3 | G | T |
| TCGA-04-1347 | PLEKHF2    | ENST00000315367 | p.K139N  | c.417G>T   | Verified   | GGG | AAG | ACA | 3 | G | T |
| TCGA-13-1499 | PLEKHG4B_I | ENST00000283426 | p.V412F  | c.1234G>T  | Verified   | ACC | GTC | CTG | 1 | G | T |
| TCGA-13-1499 | PLXDC1     | ENST00000315392 | p.V55L   | c.163G>T   | Verified   | CAT | GTG | TCA | 1 | G | T |
| TCGA-13-0916 | PLXNA4     | ENST00000378539 | p.D89Y   | c.265G>T   | Verified   | CCG | GAC | GAG | 1 | G | T |
| TCGA-04-1362 | PLXNA4_EN  | ENST00000321063 | p.E1568* | c.4702G>T  | Verified   | GAT | GAA | GAC | 1 | G | T |
| TCGA-13-0887 | PLXNB2     | XM_371474.2     | p.D970Y  | c.2908G>T  | Verified   | gag | gac | gtg | 1 | G | T |
| TCGA-29-1770 | PMS2       | ENST00000265849 | p.G750C  | c.2248G>T  | Unverified | AAT | GGC | TTT | 1 | G | T |
| TCGA-61-1740 | POLA1_ENS  | ENST00000379059 | p.V1059F | c.3175G>T  | Unverified | CTG | GTT | GTT | 1 | G | T |
| TCGA-23-1114 | POLA2      | ENST00000265465 | p.E106*  | c.316G>T   | Unverified | GAA | GAG | GAA | 1 | G | T |
| TCGA-23-1114 | POLA2_ENS  | ENST00000265465 | p.E106*  | c.316G>T   | Unverified | GAA | GAG | GAA | 1 | G | T |
| TCGA-24-1469 | POLR3B     | ENST00000228347 | p.L29L   | c.87G>T    | Verified   | AGG | CTG | CTT | 3 | G | T |
| TCGA-61-1998 | POMT2      | ENST00000261534 | p.V342V  | c.1026G>T  | Verified   | TCT | GTG | ATC | 3 | G | T |
| TCGA-23-1114 | POP1       | ENST00000349693 | p.W631C  | c.1893G>T  | Unverified | TTC | TGG | ATT | 3 | G | T |
| TCGA-09-2044 | POTED      | ENST00000299443 | p.G239*  | c.715G>T   | Verified   | TAT | GGA | AAT | 1 | G | T |
| TCGA-13-0883 | POTEF      | ENST00000409914 | p.K100N  | c.300G>T   | Verified   | GGC | AAG | TGG | 3 | G | T |
| TCGA-24-1422 | POU6F1     | ENST00000333640 | p.A248S  | c.742G>T   | Verified   | GAG | GCT | CTC | 1 | G | T |
| TCGA-23-1114 | PPAPDC2    | ENST00000381883 | p.D93Y   | c.277G>T   | Unverified | ATG | GAC | TTG | 1 | G | T |
| TCGA-23-1022 | PPBP       | ENST00000296028 | p.G48V   | c.143G>T   | Verified   | AAA | GGC | AAA | 2 | G | T |

|              |            |                 |          |             |            |     |     |     |   |   |   |
|--------------|------------|-----------------|----------|-------------|------------|-----|-----|-----|---|---|---|
| TCGA-61-1895 | PPL        | ENST00000345988 | p.E1044* | c.3130G>T   | Unverified | GAA | GAG | AAG | 1 | G | T |
| TCGA-24-2280 | PPM1E      | ENST00000308249 | p.G523V  | c.1568G>T   | Unverified | cat | gga | gag | 2 | G | T |
| TCGA-61-1900 | PPP1CB     | ENST00000358506 | p.G173V  | c.518G>T    | Unverified | cat | gga | gga | 2 | G | T |
| TCGA-13-1498 | PPP1R11    | ENST00000376772 | p.A69S   | c.205G>T    | Verified   | cgg | gcc | ttt | 1 | G | T |
| TCGA-04-1356 | PPP1R13L   | ENST00000360957 | p.P59P   | c.177G>T    | Unverified | GGC | CCG | CAG | 3 | G | T |
| TCGA-29-1783 | PPP1R15A   | ENST00000200453 | p.D406Y  | c.1216G>T   | Unverified | AGT | GAT | ACA | 1 | G | T |
| TCGA-13-1488 | PPP1R3B    | ENST00000310455 | p.M243I  | c.729G>T    | Verified   | GGA | ATG | ACC | 3 | G | T |
| TCGA-24-1616 | PPP2R1A    | ENST00000322088 | p.W257C  | c.771G>T    | Verified   | tcc | tgg | cgc | 3 | G | T |
| TCGA-04-1530 | PPP3R2     | ENST00000374806 | p.G89C   | c.265G>T    | Verified   | aag | ggc | gac | 1 | G | T |
| TCGA-23-2078 | PPP6R1_ENS | ENST00000412770 | p.A632S  | c.1894G>T   | Unverified | GAG | GCC | CAG | 1 | G | T |
| TCGA-36-1577 | PRC1       | ENST00000394249 | p.G543V  | c.1628G>T   | Unverified | CAT | GGA | GCC | 2 | G | T |
| TCGA-61-2012 | PRDM7      | ENST00000325921 | p.A58S   | c.172G>T    | Unverified | GAG | GCA | TCT | 1 | G | T |
| TCGA-13-0795 | PREPL      | ENST00000260648 | p.?      | c.2094+1G>T | Verified   | AAA | AAG | ATT | 3 | G | T |
| TCGA-24-0979 | PREX1      | ENST00000371941 | p.C234F  | c.701G>T    | Verified   | GTT | TGC | TCC | 2 | G | T |
| TCGA-25-2393 | PRKCQ      | ENST00000263125 | p.G499*  | c.1495G>T   | Verified   | aaa | gga | ata | 1 | G | T |
| TCGA-29-1701 | PRKG1      | ENST00000373980 | p.D508Y  | c.1522G>T   | Unverified | cta | gat | cac | 1 | G | T |
| TCGA-29-1701 | PRKG1_ENS  | ENST00000401604 | p.D493Y  | c.1477G>T   | Unverified | CTA | GAT | CAC | 1 | G | T |
| TCGA-24-1845 | PRKG2      | ENST00000395578 | p.G602G  | c.1806G>T   | Unverified | ATA | GGG | TCT | 3 | G | T |
| TCGA-24-1845 | PRKG2_ENS  | ENST00000395578 | p.G602G  | c.1806G>T   | Unverified | ATA | GGG | TCT | 3 | G | T |
| TCGA-09-2050 | PRPF19     | ENST00000227524 | p.E197*  | c.589G>T    | Verified   | GAG | GAG | CTG | 1 | G | T |
| TCGA-04-1651 | PRR14L_ENS | ENST00000327423 | p.V186L  | c.556G>T    | Unverified | AAT | GTA | CAG | 1 | G | T |
| TCGA-04-1651 | PRR14L_ENS | ENST00000327423 | p.V186L  | c.556G>T    | Unverified | AAT | GTA | CAG | 1 | G | T |
| TCGA-04-1651 | PRR14L_ENS | ENST00000397493 | p.V186L  | c.556G>T    | Unverified | AAT | GTA | CAG | 1 | G | T |
| TCGA-04-1651 | PRR14L_ENS | ENST00000397493 | p.V186L  | c.556G>T    | Unverified | AAT | GTA | CAG | 1 | G | T |
| TCGA-61-1738 | PRSS35     | ENST00000369700 | p.G218C  | c.652G>T    | Unverified | GAG | GGT | ACC | 1 | G | T |
| TCGA-61-1738 | PRSS35     | ENST00000369700 | p.G218C  | c.652G>T    | Unverified | GAG | GGT | ACC | 1 | G | T |
| TCGA-29-1691 | PRSS55     | ENST00000328655 | p.W186C  | c.558G>T    | Unverified | ACA | TGG | CGC | 3 | G | T |
| TCGA-09-1674 | PRX        | ENST00000324001 | p.E628D  | c.1884G>T   | Unverified | CCA | GAG | ATG | 3 | G | T |
| TCGA-23-1022 | PSMD3      | ENST00000264639 | p.G383V  | c.1148G>T   | Verified   | TTT | GGG | GAG | 2 | G | T |
| TCGA-13-1481 | PSME1      | ENST00000206451 | p.V150L  | c.448G>T    | Verified   | GGA | GTG | GCT | 1 | G | T |
| TCGA-25-1326 | PTCH1      | ENST00000331920 | p.A1101S | c.3301G>T   | Verified   | GTT | GCT | TTG | 1 | G | T |
| TCGA-25-1326 | PTCH1_ENS  | ENST00000331920 | p.A1101S | c.3301G>T   | Verified   | GTT | GCT | TTG | 1 | G | T |
| TCGA-10-0930 | PTEN       | ENST00000371953 | p.V175L  | c.523G>T    | Verified   | tat | gtg | tat | 1 | G | T |
| TCGA-10-0930 | PTEN       | ENST00000371953 | p.V175L  | c.523G>T    | Verified   | tat | gtg | tat | 1 | G | T |

|              |            |                 |          |             |            |     |     |     |   |   |   |
|--------------|------------|-----------------|----------|-------------|------------|-----|-----|-----|---|---|---|
| TCGA-13-1507 | PTGDR      | ENST00000306051 | p.W131L  | c.392G>T    | Verified   | TGC | TGG | CTC | 2 | G | T |
| TCGA-04-1347 | PTGFR      | ENST00000370756 | p.L296F  | c.888G>T    | Verified   | ACA | TTG | GAA | 3 | G | T |
| TCGA-04-1347 | PTGFR_ENS  | ENST00000370758 | p.G273*  | c.817G>T    | Verified   | ATT | GGA | ATA | 1 | G | T |
| TCGA-23-1022 | PTGIS      | ENST00000244043 | p.A307S  | c.919G>T    | Verified   | CTG | GCT | GCT | 1 | G | T |
| TCGA-23-1110 | PTK2B      | ENST00000397501 | p.R770R  | c.2310G>T   | Verified   | CAC | CGG | CAC | 3 | G | T |
| TCGA-04-1638 | PTOV1      | ENST00000391842 | p.C359F  | c.1076G>T   | Unverified | tcg | tgt | gag | 2 | G | T |
| TCGA-13-1408 | PTPRG      | ENST00000474889 | p.V237F  | c.709G>T    | Verified   | TTC | GTC | CTC | 1 | G | T |
| TCGA-13-1505 | PTPRH      | ENST00000376350 | p.A403S  | c.1207G>T   | Verified   | ATC | GCC | CTA | 1 | G | T |
| TCGA-09-2051 | PTPRN      | ENST00000295718 | p.L338L  | c.1014G>T   | Unverified | agg | ctg | gcc | 3 | G | T |
| TCGA-29-1775 | PTPRN      | ENST00000295718 | p.L493L  | c.1479G>T   | Unverified | atc | ctg | gct | 3 | G | T |
| TCGA-61-1740 | PTPRT      | NM_133170.2     | p.E287*  | c.859G>T    | Unverified | aaa | gag | cct | 1 | G | T |
| TCGA-04-1652 | PTPRZ1     | ENST00000393386 | p.D866Y  | c.2596G>T   | Unverified | GGT | GAT | TTG | 1 | G | T |
| TCGA-04-1652 | PTPRZ1     | ENST00000393386 | p.D866Y  | c.2596G>T   | Unverified | GGT | GAT | TTG | 1 | G | T |
| TCGA-13-1498 | PTPRZ1     | ENST00000393386 | p.G667*  | c.1999G>T   | Verified   | GTT | GGA | TCA | 1 | G | T |
| TCGA-04-1652 | PTPRZ1_ENS | ENST00000393386 | p.D866Y  | c.2596G>T   | Unverified | GGT | GAT | TTG | 1 | G | T |
| TCGA-04-1652 | PTPRZ1_ENS | ENST00000393386 | p.D866Y  | c.2596G>T   | Unverified | GGT | GAT | TTG | 1 | G | T |
| TCGA-23-1031 | PUS10      | ENST00000316752 | p.E408*  | c.1222G>T   | Verified   | GAA | GAA | GAA | 1 | G | T |
| TCGA-24-1846 | PVALB      | ENST00000216200 | p.D91Y   | c.271G>T    | Unverified | GGA | GAC | AAA | 1 | G | T |
| TCGA-61-1910 | PXN        | ENST00000424649 | p.L7L    | c.21G>T     | Unverified | GCC | CTG | CTG | 3 | G | T |
| TCGA-61-1910 | PXN_ENST0  | ENST00000228307 | p.L7L    | c.21G>T     | Unverified | GCC | CTG | CTG | 3 | G | T |
| TCGA-24-1850 | Q5T7C0_HU  | ENST00000255320 | p.C106F  | c.317G>T    | Unverified | TTC | TGC | TCT | 2 | G | T |
| TCGA-13-0887 | Q6YL47_HU  | ENST00000322367 | p.A1234S | c.3700G>T   | Verified   | AGG | GCC | GGT | 1 | G | T |
| TCGA-13-0762 | Q6YL47_HU  | ENST00000322367 | p.R864L  | c.2591G>T   | Verified   | TTC | CGC | CTG | 2 | G | T |
| TCGA-13-0762 | Q6YL47_HU  | ENST00000322367 | p.R864L  | c.2591G>T   | Verified   | TTC | CGC | CTG | 2 | G | T |
| TCGA-24-1464 | Q86U89_HL  | ENST00000220847 | p.G215*  | c.643G>T    | Verified   | TTT | GGA | CTT | 1 | G | T |
| TCGA-61-1900 | Q8NH77_HL  | ENST00000316517 | p.W29L   | c.86G>T     | Unverified | GAG | TGG | CAG | 2 | G | T |
| TCGA-24-1463 | QDPR       | ENST00000281243 | p.K79N   | c.237G>T    | Verified   | GAG | AAG | GTG | 3 | G | T |
| TCGA-29-1699 | QRFPR      | ENST00000394427 | p.K303N  | c.909G>T    | Unverified | GAA | AAG | GAA | 3 | G | T |
| TCGA-24-1103 | QRICH2     | ENST00000262765 | p.G769V  | c.2306G>T   | Verified   | CCT | GGT | GCC | 2 | G | T |
| TCGA-13-0885 | RAB15      | ENST00000267512 | p.R169S  | c.507G>T    | Verified   | atg | agg | agc | 3 | G | T |
| TCGA-30-1718 | RAB20      | ENST00000267328 | p.R209I  | c.626G>T    | Unverified | CAG | AGA | GCT | 2 | G | T |
| TCGA-30-1718 | RAB20_ENS  | ENST00000267328 | p.R209I  | c.626G>T    | Unverified | CAG | AGA | GCT | 2 | G | T |
| TCGA-13-1488 | RAB37      | ENST00000402449 | p.Q198H  | c.594G>T    | Verified   | TTC | CAG | ATC | 3 | G | T |
| TCGA-61-1895 | RAB3GAP1   | ENST00000264158 | p.?      | c.2289+1G>T | Unverified | GAA | AAG | GTG | 3 | G | T |

|              |            |                 |          |           |            |     |     |     |   |   |   |
|--------------|------------|-----------------|----------|-----------|------------|-----|-----|-----|---|---|---|
| TCGA-13-0795 | RAB40AL    | ENST00000218249 | p.T70T   | c.210G>T  | Verified   | GAT | ACG | TCG | 3 | G | T |
| TCGA-24-1850 | RAE1       | ENST00000395841 | p.R159L  | c.476G>T  | Unverified | act | cga | tcg | 2 | G | T |
| TCGA-29-1762 | RALB       | ENST00000272519 | p.V125F  | c.373G>T  | Unverified | ctc | gtc | gtg | 1 | G | T |
| TCGA-61-1895 | RANBP2     | ENST00000283195 | p.S1592I | c.4775G>T | Unverified | ACA | AGC | AAG | 2 | G | T |
| TCGA-61-1895 | RANBP2_EN  | ENST00000283195 | p.S1592I | c.4775G>T | Unverified | ACA | AGC | AAG | 2 | G | T |
| TCGA-61-2095 | RANBP3     | ENST00000340578 | p.G141V  | c.422G>T  | Unverified | agt | ggc | ttc | 2 | G | T |
| TCGA-13-0887 | RAPGEF1    | ENST00000372190 | p.G846W  | c.2536G>T | Verified   | cgg | ggg | gta | 1 | G | T |
| TCGA-29-1698 | RAPGEFL1   | ENST00000264644 | p.G106C  | c.316G>T  | Unverified | cgg | ggc | tct | 1 | G | T |
| TCGA-25-2391 | RASA1      | ENST00000274376 | p.G700C  | c.2098G>T | Verified   | aaa | ggt | att | 1 | G | T |
| TCGA-25-2392 | RASAL1     | ENST00000261729 | p.G50V   | c.149G>T  | Verified   | CTG | GGC | CCC | 2 | G | T |
| TCGA-09-2044 | RASAL2     | ENST00000263528 | p.E120*  | c.358G>T  | Verified   | TCC | GAG | GGT | 1 | G | T |
| TCGA-20-1686 | RASSF8     | ENST00000381352 | p.E290D  | c.870G>T  | Unverified | GAA | GAG | GTT | 3 | G | T |
| TCGA-20-1686 | RASSF8_ENS | ENST00000541490 | p.E290D  | c.870G>T  | Unverified | GAA | GAG | GTT | 3 | G | T |
| TCGA-13-1498 | RB1CC1     | ENST00000025008 | p.E1387* | c.4159G>T | Verified   | GAA | GAA | GAA | 1 | G | T |
| TCGA-24-2024 | RB1CC1     | ENST00000025008 | p.G1411* | c.4231G>T | Verified   | TAT | GGA | GCT | 1 | G | T |
| TCGA-25-2393 | RB1CC1     | ENST00000025008 | p.E1388* | c.4162G>T | Verified   | GAA | GAA | GTC | 1 | G | T |
| TCGA-29-1764 | RB1CC1     | ENST00000025008 | p.R550L  | c.1649G>T | Unverified | AAT | CGT | CTG | 2 | G | T |
| TCGA-09-2051 | RBBP7      | ENST00000380087 | p.V297L  | c.889G>T  | Unverified | acc | gta | gct | 1 | G | T |
| TCGA-23-1118 | RBL2       | ENST00000262133 | p.S1090I | c.3269G>T | Verified   | AAT | AGT | ATG | 2 | G | T |
| TCGA-24-1846 | RBM12      | ENST00000374104 | p.V13L   | c.37G>T   | Unverified | ATT | GTG | GCG | 1 | G | T |
| TCGA-13-1510 | RBM47      | ENST00000319592 | p.G43C   | c.127G>T  | Unverified | ACG | GGC | TAC | 1 | G | T |
| TCGA-13-0885 | RBM6       | ENST00000266022 | p.A77S   | c.229G>T  | Verified   | GGA | GCT | AGA | 1 | G | T |
| TCGA-04-1338 | RBPJL      | ENST00000343694 | p.C208F  | c.623G>T  | Verified   | ctg | tgc | ata | 2 | G | T |
| TCGA-61-1904 | RBPJL      | ENST00000343694 | p.R220L  | c.659G>T  | Unverified | aac | cgc | ctg | 2 | G | T |
| TCGA-25-1313 | REEP6      | ENST00000233596 | p.P142P  | c.426G>T  | Unverified | CGT | CCG | CTG | 3 | G | T |
| TCGA-25-1313 | REEP6_ENST | ENST00000395484 | p.A210S  | c.628G>T  | Unverified | TCC | GCT | GTT | 1 | G | T |
| TCGA-29-1769 | RELN       | ENST00000343529 | p.G2603C | c.7807G>T | Unverified | GGA | GGC | ATT | 1 | G | T |
| TCGA-24-2262 | REPS2      | NM_004726.1     | p.V417L  | c.1249G>T | Unverified | gat | gta | ctg | 1 | G | T |
| TCGA-25-2042 | RFTN1      | ENST00000334133 | p.G489V  | c.1466G>T | Verified   | GCT | GGA | GAC | 2 | G | T |
| TCGA-10-0930 | RFXAP      | ENST00000255476 | p.E200*  | c.598G>T  | Verified   | CTC | GAG | GAA | 1 | G | T |
| TCGA-10-0930 | RFXAP      | ENST00000255476 | p.E200*  | c.598G>T  | Verified   | CTC | GAG | GAA | 1 | G | T |
| TCGA-23-1022 | RGL4       | ENST00000290691 | p.A363S  | c.1087G>T | Verified   | aag | gcg | ggg | 1 | G | T |
| TCGA-61-1998 | RGS22      | ENST00000360863 | p.R1037L | c.3110G>T | Verified   | CAA | CGT | TTT | 2 | G | T |
| TCGA-13-0883 | RHBG       | ENST00000368249 | p.G306V  | c.917G>T  | Verified   | TTT | GGG | GCT | 2 | G | T |

|              |          |                 |          |           |            |     |     |     |   |   |   |
|--------------|----------|-----------------|----------|-----------|------------|-----|-----|-----|---|---|---|
| TCGA-61-2095 | RIMS1    | ENST00000521978 | p.A340A  | c.1020G>T | Unverified | GCG | GCG | GAT | 3 | G | T |
| TCGA-23-1110 | RIN2     | NM_018993.2     | p.G10C   | c.28G>T   | Verified   | cgc | ggt | ctg | 1 | G | T |
| TCGA-13-0904 | RLIM     | ENST00000332687 | p.R117I  | c.350G>T  | Verified   | caa | aga | gga | 2 | G | T |
| TCGA-09-2051 | RND1     | ENST00000309739 | p.E150D  | c.450G>T  | Unverified | tat | gag | cag | 3 | G | T |
| TCGA-13-1505 | RNF112   | ENST00000299604 | p.V345V  | c.1035G>T | Verified   | AAG | GTG | CAG | 3 | G | T |
| TCGA-13-0714 | RNF113B  | ENST00000267291 | p.E232D  | c.696G>T  | Verified   | GAA | GAG | GGT | 3 | G | T |
| TCGA-24-2280 | RNF133   | ENST00000340112 | p.R262L  | c.785G>T  | Unverified | gaa | cgc | tat | 2 | G | T |
| TCGA-61-1737 | RNF19A   | ENST00000519449 | p.G86C   | c.256G>T  | Unverified | aat | ggc | ggg | 1 | G | T |
| TCGA-13-1481 | RNF213   | ENST00000336301 | p.K741N  | c.2223G>T | Verified   | TCC | AAG | TCC | 3 | G | T |
| TCGA-04-1342 | RNPS1    | ENST00000397086 | p.E232D  | c.696G>T  | Unverified | CAG | GAG | ATC | 3 | G | T |
| TCGA-20-0990 | RORA     | ENST00000261523 | p.E14D   | c.42G>T   | Verified   | ACT | GAG | GCA | 3 | G | T |
| TCGA-61-2094 | ROS1     | ENST00000368508 | p.V707V  | c.2121G>T | Unverified | AAT | GTG | TCA | 3 | G | T |
| TCGA-04-1367 | RP1      | ENST00000220676 | p.T1796T | c.5388G>T | Verified   | CCA | ACG | ATG | 3 | G | T |
| TCGA-24-2289 | RP1      | ENST00000220676 | p.Q2077H | c.6231G>T | Unverified | TTC | CAG | GGC | 3 | G | T |
| TCGA-24-1417 | RP1L1    | ENST00000382483 | p.G2369C | c.7105G>T | Verified   | GAA | GGT | TAT | 1 | G | T |
| TCGA-29-1690 | RP1L1    | ENST00000382483 | p.G1335V | c.4004G>T | Unverified | GAG | GGG | GTG | 2 | G | T |
| TCGA-23-1124 | RPGRIP1L | ENST00000379925 | p.G103V  | c.308G>T  | Verified   | CTG | GGA | CGA | 2 | G | T |
| TCGA-13-1498 | RPL15    | ENST00000354811 | p.G175*  | c.523G>T  | Verified   | CTT | GGA | AAG | 1 | G | T |
| TCGA-13-0905 | RPP38    | ENST00000378203 | p.V21V   | c.63G>T   | Verified   | GTT | GTG | AAG | 3 | G | T |
| TCGA-23-1120 | RPS6KA2  | ENST00000265678 | p.R685L  | c.2054G>T | Verified   | AGC | CGA | CAG | 2 | G | T |
| TCGA-09-1674 | RPTN     | ENST00000316073 | p.G464V  | c.1391G>T | Unverified | TAT | GGT | CAG | 2 | G | T |
| TCGA-13-0760 | RREB1    | ENST00000379933 | p.G782V  | c.2345G>T | Verified   | GGC | GGG | GGC | 2 | G | T |
| TCGA-04-1331 | RRP9     | ENST00000232888 | p.K44N   | c.132G>T  | Verified   | GGC | AAG | ATG | 3 | G | T |
| TCGA-25-1318 | RUSC2    | ENST00000361226 | p.K970N  | c.2910G>T | Verified   | GAG | AAG | CCT | 3 | G | T |
| TCGA-25-1318 | RUSC2    | ENST00000361226 | p.K970N  | c.2910G>T | Verified   | GAG | AAG | CCT | 3 | G | T |
| TCGA-24-1422 | RWDD4    | ENST00000326397 | p.L100F  | c.300G>T  | Verified   | ACA | TTG | TTT | 3 | G | T |
| TCGA-13-0761 | RYR1     | ENST00000359596 | p.G1184W | c.3550G>T | Unverified | ATT | GGG | GAC | 1 | G | T |
| TCGA-13-0761 | RYR1     | ENST00000359596 | p.G1184W | c.3550G>T | Unverified | ATT | GGG | GAC | 1 | G | T |
| TCGA-24-1423 | RYR2     | ENST00000366574 | p.A1798S | c.5392G>T | Verified   | GAA | GCT | GTT | 1 | G | T |
| TCGA-23-1114 | RYR2     | ENST00000366574 | p.G253V  | c.758G>T  | Unverified | CAT | GGT | GAA | 2 | G | T |
| TCGA-09-2044 | RYR3     | ENST00000389232 | p.G609G  | c.1827G>T | Verified   | AAT | GGG | GTT | 3 | G | T |
| TCGA-61-2012 | RYR3     | ENST00000389232 | p.M2040I | c.6120G>T | Verified   | CTC | ATG | ATC | 3 | G | T |
| TCGA-20-1683 | S100A7A  | ENST00000329256 | p.G99V   | c.296G>T  | Unverified | GGG | GGA | AGC | 2 | G | T |
| TCGA-24-1843 | S1PR2    | ENST00000317726 | p.E109D  | c.327G>T  | Unverified | CGG | GAG | GGC | 3 | G | T |

|              |            |                 |          |           |            |     |     |     |   |   |   |
|--------------|------------|-----------------|----------|-----------|------------|-----|-----|-----|---|---|---|
| TCGA-23-1022 | S1PR3      | ENST00000375846 | p.R311L  | c.932G>T  | Verified   | TTC | CGT | CTG | 2 | G | T |
| TCGA-29-1705 | SALL1      | ENST00000251020 | p.G895V  | c.2684G>T | Unverified | GAG | GGG | GAT | 2 | G | T |
| TCGA-13-0807 | SALL3      | ENST00000537592 | p.G1254C | c.3760G>T | Verified   | CTG | GGC | AGC | 1 | G | T |
| TCGA-23-1116 | SAMD10     | ENST00000369886 | p.V178L  | c.532G>T  | Unverified | CAG | GTG | CTC | 1 | G | T |
| TCGA-13-1481 | SAMD9      | ENST00000379958 | p.A651S  | c.1951G>T | Verified   | ACT | GCT | CTG | 1 | G | T |
| TCGA-24-1469 | SAMD9      | ENST00000379958 | p.R1040L | c.3119G>T | Verified   | CAC | CGC | GAT | 2 | G | T |
| TCGA-25-2400 | SAMD9L     | ENST00000318238 | p.E1358* | c.4072G>T | Verified   | ATG | GAA | AGT | 1 | G | T |
| TCGA-24-2262 | SBF1       | ENST00000390679 | p.G688W  | c.2062G>T | Unverified | TAT | GGG | GAT | 1 | G | T |
| TCGA-61-1740 | SBF1       | ENST00000390679 | p.G409V  | c.1226G>T | Unverified | CGT | GGG | CTG | 2 | G | T |
| TCGA-61-1740 | SBF1_ENST0 | ENST00000380817 | p.G409V  | c.1226G>T | Unverified | CGT | GGG | CTG | 2 | G | T |
| TCGA-61-1913 | SBK2       | ENST00000344158 | p.G85C   | c.253G>T  | Unverified | AAA | GGC | ACA | 1 | G | T |
| TCGA-25-2400 | SBSN       | ENST00000518157 | p.G154G  | c.462G>T  | Verified   | CAA | GGG | GTC | 3 | G | T |
| TCGA-13-0919 | SCAF8      | ENST00000367178 | p.E1101D | c.3303G>T | Verified   | GAT | GAG | AGA | 3 | G | T |
| TCGA-61-1740 | SCIN       | ENST00000297029 | p.E666*  | c.1996G>T | Unverified | GTT | GAG | AAA | 1 | G | T |
| TCGA-61-1740 | SCIN_ENST0 | ENST00000297029 | p.E666*  | c.1996G>T | Unverified | GTT | GAG | AAA | 1 | G | T |
| TCGA-24-2289 | SCN4B      | ENST00000324727 | p.G171C  | c.511G>T  | Unverified | GTG | GGC | GGG | 1 | G | T |
| TCGA-24-2267 | SCTR       | ENST00000019103 | p.W112C  | c.336G>T  | Verified   | GGC | TGG | TCA | 3 | G | T |
| TCGA-24-1104 | SDC1       | ENST00000254351 | p.R155M  | c.464G>T  | Verified   | CAC | AGG | GAC | 2 | G | T |
| TCGA-61-2095 | SDHA       | ENST00000264932 | p.R195R  | c.585G>T  | Unverified | GAT | CGG | ACT | 3 | G | T |
| TCGA-04-1367 | SDHAF2     | ENST00000301761 | p.L16L   | c.48G>T   | Verified   | GCT | CTG | TCA | 3 | G | T |
| TCGA-24-2280 | SDK1       | ENST00000404826 | p.V361F  | c.1081G>T | Unverified | TAC | GTC | TGC | 1 | G | T |
| TCGA-23-1117 | SDK2       | ENST00000316893 | p.V1698F | c.5092G>T | Verified   | ATG | GTC | AGC | 1 | G | T |
| TCGA-23-1117 | SDK2       | ENST00000316893 | p.V1698F | c.5092G>T | Verified   | ATG | GTC | AGC | 1 | G | T |
| TCGA-13-1497 | SELE       | ENST00000333360 | p.C394F  | c.1181G>T | Verified   | AGC | TGT | GAG | 2 | G | T |
| TCGA-04-1338 | SEMA3A     | ENST00000265362 | p.V295L  | c.883G>T  | Verified   | TCA | GTG | CCA | 1 | G | T |
| TCGA-13-0760 | SEMA5B     | ENST00000357599 | p.G42C   | c.124G>T  | Verified   | AGG | GGT | CTT | 1 | G | T |
| TCGA-13-0883 | SEPN1      | ENST00000361547 | p.E62*   | c.184G>T  | Verified   | CAG | GAA | CTG | 1 | G | T |
| TCGA-13-0760 | SERPINA10  | ENST00000393096 | p.R437M  | c.1310G>T | Verified   | ggc | agg | gtg | 2 | G | T |
| TCGA-24-2267 | SERPINA9_E | ENST00000337425 | p.M414I  | c.1242G>T | Verified   | ATG | ATG | ATT | 3 | G | T |
| TCGA-04-1649 | SERPINB3   | ENST00000283752 | p.T155T  | c.465G>T  | Unverified | caa | acg | aat | 3 | G | T |
| TCGA-24-2024 | SERPINE3   | ENST00000521255 | p.R201I  | c.602G>T  | Verified   | AAG | AGA | TTC | 2 | G | T |
| TCGA-24-1423 | SETD1A     | ENST00000262519 | p.V1094V | c.3282G>T | Verified   | GAG | GTG | CCA | 3 | G | T |
| TCGA-13-0893 | SETD2      | ENST00000330022 | p.G1156V | c.3467G>T | Verified   | TCA | GGC | TCA | 2 | G | T |
| TCGA-13-0893 | SETD2_ENST | ENST00000409792 | p.G1659V | c.4976G>T | Verified   | TCA | GGC | TCA | 2 | G | T |

|              |            |                 |          |            |            |     |     |     |   |   |   |
|--------------|------------|-----------------|----------|------------|------------|-----|-----|-----|---|---|---|
| TCGA-24-1470 | SETD7      | ENST00000274031 | p.G343V  | c.1028G>T  | Verified   | CCC | GGG | AAG | 2 | G | T |
| TCGA-13-1510 | SF3A1      | ENST00000215793 | p.D286Y  | c.856G>T   | Unverified | GTG | GAC | TTC | 1 | G | T |
| TCGA-24-2024 | SF3A1      | ENST00000215793 | p.V711L  | c.2131G>T  | Verified   | CAG | GTG | CCC | 1 | G | T |
| TCGA-23-1124 | SF3A1      | ENST00000215793 | p.G478V  | c.1433G>T  | Verified   | TTC | GGT | GTA | 2 | G | T |
| TCGA-13-0900 | SFI1       | ENST00000400288 | p.E1154D | c.3462G>T  | Unverified | CTT | GAG | GAG | 3 | G | T |
| TCGA-61-1913 | SgK069     | ENST00000413299 | p.G85C   | c.253G>T   | Unverified | AAA | GGC | ACA | 1 | G | T |
| TCGA-20-1686 | SGOL2      | ENST00000357799 | p.E92*   | c.274G>T   | Unverified | TTT | GAG | AAC | 1 | G | T |
| TCGA-23-1110 | SGOL2      | ENST00000357799 | p.K1106N | c.3318G>T  | Verified   | GGA | AAG | TCT | 3 | G | T |
| TCGA-09-1674 | SGSM2      | ENST00000268989 | p.A60S   | c.178G>T   | Unverified | GCC | GCT | GGC | 1 | G | T |
| TCGA-13-0923 | SH2D3C     | ENST00000314830 | p.G365V  | c.1094G>T  | Verified   | GAT | GGG | CTC | 2 | G | T |
| TCGA-61-2095 | SH3GLB2    | ENST00000372559 | p.D131Y  | c.391G>T   | Unverified | AGG | GAT | TTT | 1 | G | T |
| TCGA-24-1845 | SH3PXD2B   | ENST00000311601 | p.L587L  | c.1761G>T  | Unverified | AGA | CTG | TTC | 3 | G | T |
| TCGA-13-1499 | SHANK2     | ENST00000294018 | p.D807Y  | c.2419G>T  | Verified   | TTG | GAT | GAG | 1 | G | T |
| TCGA-04-1356 | SHE        | ENST00000304760 | p.E324D  | c.972G>T   | Verified   | GCA | GAG | TAC | 3 | G | T |
| TCGA-61-1725 | SLAIN1     | ENST00000267219 | p.S300I  | c.899G>T   | Unverified | CGC | AGT | GCA | 2 | G | T |
| TCGA-04-1336 | SLC12A3    | ENST00000438926 | p.G493V  | c.1478G>T  | Verified   | ATC | GGC | TTC | 2 | G | T |
| TCGA-13-1510 | SLC12A8_EN | ENST00000393469 | p.D43Y   | c.127G>T   | Unverified | TGG | GAT | GGT | 1 | G | T |
| TCGA-13-1481 | SLC13A3    | ENST00000279027 | p.K166N  | c.498G>T   | Verified   | CAG | AAG | GAG | 3 | G | T |
| TCGA-24-1845 | SLC16A10   | ENST00000368851 | p.V356L  | c.1066G>T  | Unverified | GGT | GTG | AAG | 1 | G | T |
| TCGA-23-1022 | SLC16A11   | ENST00000308009 | p.S420I  | c.1259G>T  | Verified   | GGC | AGC | TTC | 2 | G | T |
| TCGA-24-1474 | SLC16A14   | ENST00000295190 | p.E64*   | c.190G>T   | Unverified | GAA | GAA | TTC | 1 | G | T |
| TCGA-13-1497 | SLC16A14   | ENST00000295190 | p.A207A  | c.621G>T   | Verified   | GGG | GCG | CTC | 3 | G | T |
| TCGA-23-1029 | SLC16A7    | ENST00000261187 | p.?      | c.217+1G>T | Unverified | GGA | GGT | CCT | 1 | G | T |
| TCGA-23-1114 | SLC17A7    | ENST00000221485 | p.G421V  | c.1262G>T  | Unverified | TCT | GGG | TTC | 2 | G | T |
| TCGA-13-1505 | SLC17A8    | ENST00000323346 | p.E271D  | c.813G>T   | Verified   | TAT | GAG | TGC | 3 | G | T |
| TCGA-25-2393 | SLC19A3    | ENST00000258403 | p.V116F  | c.346G>T   | Verified   | ATG | GTC | ACC | 1 | G | T |
| TCGA-13-1499 | SLC1A2     | ENST00000278379 | p.V122V  | c.366G>T   | Verified   | ATG | GTG | TAT | 3 | G | T |
| TCGA-24-1845 | SLC1A6     | ENST00000221742 | p.V496V  | c.1488G>T  | Unverified | GCC | GTG | GAC | 3 | G | T |
| TCGA-09-2049 | SLC20A2    | ENST00000342228 | p.W518C  | c.1554G>T  | Verified   | TTG | TGG | CTG | 3 | G | T |
| TCGA-61-2113 | SLC27A5    | ENST00000263093 | p.L662L  | c.1986G>T  | Unverified | CCT | CTG | TTT | 3 | G | T |
| TCGA-24-2024 | SLC2A3     | ENST00000075120 | p.G109V  | c.326G>T   | Verified   | ATG | GGA | CTG | 2 | G | T |
| TCGA-09-0369 | SLC2A9     | ENST00000309065 | p.G332G  | c.996G>T   | Verified   | ACA | GGG | GGC | 3 | G | T |
| TCGA-09-0369 | SLC2A9     | ENST00000309065 | p.G332G  | c.996G>T   | Verified   | ACA | GGG | GGC | 3 | G | T |
| TCGA-04-1338 | SLC30A5    | ENST00000396591 | p.L423F  | c.1269G>T  | Unverified | TTC | TTG | TGC | 3 | G | T |

|              |            |                 |          |             |            |     |     |     |   |   |   |
|--------------|------------|-----------------|----------|-------------|------------|-----|-----|-----|---|---|---|
| TCGA-13-1489 | SLC36A2    | ENST00000335244 | p.G302V  | c.905G>T    | Verified   | TTG | GGA | ATG | 2 | G | T |
| TCGA-24-2288 | SLC45A2    | ENST00000296589 | p.V274F  | c.820G>T    | Unverified | AAA | GTT | AAA | 1 | G | T |
| TCGA-09-2049 | SLC4A5     | ENST00000394019 | p.G469V  | c.1406G>T   | Verified   | GGC | GGA | ACA | 2 | G | T |
| TCGA-24-1422 | SLC4A8     | ENST00000319957 | p.L667L  | c.2001G>T   | Verified   | AAC | CTG | ACT | 3 | G | T |
| TCGA-04-1367 | SLC5A11    | ENST00000347898 | p.S222I  | c.665G>T    | Verified   | TAC | AGT | TTT | 2 | G | T |
| TCGA-23-1124 | SLC5A11    | ENST00000347898 | p.P272P  | c.816G>T    | Verified   | TGG | CCG | GGG | 3 | G | T |
| TCGA-13-1496 | SLC6A2     | ENST00000379906 | p.V10L   | c.28G>T     | Unverified | CAG | GTG | CAG | 1 | G | T |
| TCGA-61-1906 | SLC6A2     | ENST00000379906 | p.?      | c.1023-1G>T | Unverified | TAC | AGG | GAT | 3 | G | T |
| TCGA-61-1906 | SLC6A2     | ENST00000379906 | p.?      | c.1023-1G>T | Unverified | TAC | AGG | GAT | 3 | G | T |
| TCGA-61-1906 | SLC6A2_ENS | ENST00000219833 | p.?      | c.1023-1G>T | Unverified | TAC | AGG | GAT | 3 | G | T |
| TCGA-61-1906 | SLC6A2_ENS | ENST00000219833 | p.?      | c.1023-1G>T | Unverified | TAC | AGG | GAT | 3 | G | T |
| TCGA-24-1846 | SLC6A4     | ENST00000261707 | p.G146*  | c.436G>T    | Unverified | AAT | GGA | TGC | 1 | G | T |
| TCGA-29-1769 | SLC7A2     | ENST00000494857 | p.D166Y  | c.496G>T    | Unverified | CCC | GAT | TTT | 1 | G | T |
| TCGA-29-1769 | SLC7A2_ENS | ENST00000470360 | p.D206Y  | c.616G>T    | Unverified | CCC | GAT | TTT | 1 | G | T |
| TCGA-13-0900 | SLC8A1     | ENST00000403092 | p.R267L  | c.800G>T    | Verified   | TAT | CGA | GCT | 2 | G | T |
| TCGA-24-1850 | SLC8A1     | ENST00000403092 | p.E148D  | c.444G>T    | Unverified | CCT | GAG | ATT | 3 | G | T |
| TCGA-23-1123 | SLC8A3     | ENST00000381269 | p.K677N  | c.2031G>T   | Verified   | TTC | AAG | ACT | 3 | G | T |
| TCGA-23-1123 | SLC8A3     | ENST00000381269 | p.K677N  | c.2031G>T   | Verified   | TTC | AAG | ACT | 3 | G | T |
| TCGA-29-1777 | SLC9A5     | ENST00000299798 | p.G592V  | c.1775G>T   | Unverified | AGC | GGC | CGG | 2 | G | T |
| TCGA-09-2050 | SLC9A6     | ENST00000370698 | p.A304S  | c.910G>T    | Verified   | ttt | gca | atg | 1 | G | T |
| TCGA-23-1029 | SLCO1A2    | ENST00000307378 | p.G206C  | c.616G>T    | Unverified | ATT | GGT | CCT | 1 | G | T |
| TCGA-09-2044 | SLCO6A1    | ENST00000379807 | p.R60S   | c.180G>T    | Verified   | ATA | AGG | TTC | 3 | G | T |
| TCGA-30-1857 | SLIT2      | ENST00000504154 | p.A1470S | c.4408G>T   | Unverified | GCT | GCT | TGC | 1 | G | T |
| TCGA-13-1510 | SLITRK1    | ENST00000377084 | p.Q517H  | c.1551G>T   | Unverified | GAC | CAG | TTA | 3 | G | T |
| TCGA-61-2113 | SLITRK3    | ENST00000241274 | p.E968*  | c.2902G>T   | Verified   | CTC | GAA | GTC | 1 | G | T |
| TCGA-13-0923 | SLK        | NM_014720       | p.E912*  | c.2734G>T   | Verified   | caa | gag | aaa | 1 | G | T |
| TCGA-24-1470 | SLX4       | ENST00000294008 | p.W1428C | c.4284G>T   | Verified   | TGC | TGG | CAC | 3 | G | T |
| TCGA-29-1693 | SMARCD3    | ENST00000392811 | p.Q314H  | c.942G>T    | Unverified | ccc | cag | cgc | 3 | G | T |
| TCGA-29-1693 | SMARCD3_E  | ENST00000262188 | p.Q327H  | c.981G>T    | Unverified | CCC | CAG | CGC | 3 | G | T |
| TCGA-13-1498 | SMC1B      | NM_148674.1     | p.S482I  | c.1445G>T   | Verified   | aga | agt | gaa | 2 | G | T |
| TCGA-24-1469 | SMEK1_ENS  | ENST00000417249 | p.M597I  | c.1791G>T   | Verified   | CTG | ATG | AAC | 3 | G | T |
| TCGA-04-1367 | SMPDL3B    | ENST00000373894 | p.G185G  | c.555G>T    | Verified   | AGC | GGG | GCT | 3 | G | T |
| TCGA-23-1117 | SNAI2      | ENST00000020945 | p.G209G  | c.627G>T    | Verified   | acg | ggg | gag | 3 | G | T |
| TCGA-23-1117 | SNAI2      | ENST00000020945 | p.G209G  | c.627G>T    | Verified   | acg | ggg | gag | 3 | G | T |



|              |            |                 |          |            |            |     |     |     |   |   |   |
|--------------|------------|-----------------|----------|------------|------------|-----|-----|-----|---|---|---|
| TCGA-10-0930 | SNAP91     | ENST00000369694 | p.A838S  | c.2512G>T  | Verified   | GGA | GCA | GGA | 1 | G | T |
| TCGA-10-0930 | SNAP91     | ENST00000369694 | p.A838S  | c.2512G>T  | Verified   | GGA | GCA | GGA | 1 | G | T |
| TCGA-61-1737 | SNCAIP     | ENST00000261368 | p.G246C  | c.736G>T   | Unverified | TGT | GGC | TCT | 1 | G | T |
| TCGA-61-1737 | SNCAIP_ENS | ENST00000379533 | p.G293C  | c.877G>T   | Unverified | TGT | GGC | TCT | 1 | G | T |
| TCGA-61-1737 | SNCAIP_ENS | ENST00000503116 | p.G293C  | c.877G>T   | Unverified | TGT | GGC | TCT | 1 | G | T |
| TCGA-30-1856 | SNTG1      | ENST00000518864 | p.?      | c.219+1G>T | Unverified | ATA | AAG | GGA | 3 | G | T |
| TCGA-30-1856 | SNTG1_ENS  | ENST00000518864 | p.?      | c.219+1G>T | Unverified | ATA | AAG | GGA | 3 | G | T |
| TCGA-09-0369 | SNX15      | ENST00000377244 | p.R51R   | c.153G>T   | Verified   | aag | cgg | tac | 3 | G | T |
| TCGA-09-0369 | SNX15      | ENST00000377244 | p.R51R   | c.153G>T   | Verified   | aag | cgg | tac | 3 | G | T |
| TCGA-30-1857 | SNX15      | ENST00000377244 | p.R19S   | c.57G>T    | Unverified | ccc | agg | act | 3 | G | T |
| TCGA-13-1489 | SNX19      | ENST00000265909 | p.V263L  | c.787G>T   | Verified   | ctt | gta | ctc | 1 | G | T |
| TCGA-24-1844 | SON        | ENST00000356577 | p.L276L  | c.828G>T   | Unverified | GTG | CTG | AAA | 3 | G | T |
| TCGA-24-1844 | SON_ENSTO  | ENST00000300278 | p.L276L  | c.828G>T   | Unverified | GTG | CTG | AAA | 3 | G | T |
| TCGA-24-2024 | SORL1      | ENST00000260197 | p.G622*  | c.1864G>T  | Verified   | TTG | GGA | GTT | 1 | G | T |
| TCGA-23-1117 | SOS2       | ENST00000216373 | p.L1200L | c.3600G>T  | Verified   | CCT | CTG | CAT | 3 | G | T |
| TCGA-23-1117 | SOS2       | ENST00000216373 | p.L1200L | c.3600G>T  | Verified   | CCT | CTG | CAT | 3 | G | T |
| TCGA-29-1777 | SOX5       | ENST00000451604 | p.V433F  | c.1297G>T  | Unverified | tct | gtc | cca | 1 | G | T |
| TCGA-24-1843 | SPAG5      | ENST00000321765 | p.V682V  | c.2046G>T  | Unverified | GAT | GTG | GCA | 3 | G | T |
| TCGA-09-2044 | SPANXN4    | ENST00000446864 | p.G91*   | c.271G>T   | Verified   | gca | gga | tct | 1 | G | T |
| TCGA-29-2427 | SPATA5L1   | ENST00000305560 | p.L702L  | c.2106G>T  | Verified   | TTG | CTG | GCT | 3 | G | T |
| TCGA-24-2035 | SPDEF      | ENST00000374037 | p.K30N   | c.90G>T    | Unverified | gag | aag | gcg | 3 | G | T |
| TCGA-61-1907 | SPDYC      | ENST00000377185 | p.P288P  | c.864G>T   | Unverified | CCT | CCG | GCA | 3 | G | T |
| TCGA-61-1913 | SPEN       | ENST00000375759 | p.V3250F | c.9748G>T  | Unverified | ccc | gtc | cct | 1 | G | T |
| TCGA-29-1785 | SPHKAP     | XM_051221.5     | p.S1209I | c.3626G>T  | Unverified | gaa | agt | gcc | 2 | G | T |
| TCGA-29-1785 | SPHKAP     | XM_051221.5     | p.S1209I | c.3626G>T  | Unverified | gaa | agt | gcc | 2 | G | T |
| TCGA-29-1785 | SPHKAP_EN  | ENST00000392056 | p.S1209I | c.3626G>T  | Unverified | GAA | AGT | GCC | 2 | G | T |
| TCGA-29-1785 | SPHKAP_EN  | ENST00000392056 | p.S1209I | c.3626G>T  | Unverified | GAA | AGT | GCC | 2 | G | T |
| TCGA-29-1690 | SPIRE1     | ENST00000309836 | p.M92I   | c.276G>T   | Unverified | GAA | ATG | GAA | 3 | G | T |
| TCGA-29-1690 | SPIRE1_ENS | ENST00000409402 | p.M251I  | c.753G>T   | Unverified | GAA | ATG | GAA | 3 | G | T |
| TCGA-29-1777 | SPNS3      | ENST00000355530 | p.V361F  | c.1081G>T  | Unverified | CTC | GTC | CTG | 1 | G | T |
| TCGA-24-1843 | SPRR2F     | ENST00000468739 | p.C45F   | c.134G>T   | Unverified | TCC | TGC | CCA | 2 | G | T |
| TCGA-24-1469 | SPRY4      | ENST00000344120 | p.R53L   | c.158G>T   | Verified   | agc | cgg | ctc | 2 | G | T |
| TCGA-13-1408 | SPTBN2     | ENST00000309996 | p.E1918* | c.5752G>T  | Unverified | CGG | GAA | CTG | 1 | G | T |
| TCGA-24-1845 | SPTBN2     | ENST00000309996 | p.V1627L | c.4879G>T  | Unverified | GAG | GTG | AAG | 1 | G | T |

|              |            |                 |          |            |            |     |     |     |   |   |   |
|--------------|------------|-----------------|----------|------------|------------|-----|-----|-----|---|---|---|
| TCGA-61-1737 | SPTBN4     | ENST00000352632 | p.Q250H  | c.750G>T   | Unverified | GAG | CAG | CAC | 3 | G | T |
| TCGA-30-1718 | SRRM2      | ENST00000301740 | p.G1819V | c.5456G>T  | Unverified | TCT | GGT | TAT | 2 | G | T |
| TCGA-24-1423 | SRSF11     | ENST00000370950 | p.E478*  | c.1432G>T  | Verified   | GAA | GAA | GAC | 1 | G | T |
| TCGA-23-1122 | SSH3       | ENST00000308127 | p.G218C  | c.652G>T   | Verified   | AGC | GGC | CTT | 1 | G | T |
| TCGA-24-1431 | SSTR3      | ENST00000328544 | p.V260V  | c.780G>T   | Unverified | GTG | GTG | GCC | 3 | G | T |
| TCGA-20-1683 | ST18       | ENST00000276480 | p.E944*  | c.2830G>T  | Unverified | ATT | GAA | GCA | 1 | G | T |
| TCGA-23-2077 | ST6GALNAC  | ENST00000328299 | p.R7I    | c.20G>T    | Verified   | AAG | AGA | AAG | 2 | G | T |
| TCGA-61-1740 | STARD4     | ENST00000296632 | p.K141N  | c.423G>T   | Unverified | gaa | aag | aga | 3 | G | T |
| TCGA-13-1512 | STAT5B     | ENST00000293328 | p.A91S   | c.271G>T   | Verified   | tat | gcc | aca | 1 | G | T |
| TCGA-04-1331 | STK36      | ENST00000295709 | p.G811C  | c.2431G>T  | Verified   | CTT | GGT | CAG | 1 | G | T |
| TCGA-13-0795 | STK38      | ENST00000229812 | p.K354N  | c.1062G>T  | Verified   | gcc | aag | gat | 3 | G | T |
| TCGA-29-1769 | STOX1      | ENST00000399169 | p.L537F  | c.1611G>T  | Unverified | TCC | TTG | GAT | 3 | G | T |
| TCGA-29-1777 | SUGP2      | ENST00000337018 | p.V412V  | c.1236G>T  | Unverified | GCT | GTG | AAG | 3 | G | T |
| TCGA-09-2044 | SULF2      | ENST00000359930 | p.A128S  | c.382G>T   | Verified   | ttt | gcc | gtg | 1 | G | T |
| TCGA-04-1367 | SUPV3L1    | ENST00000359655 | p.G248C  | c.742G>T   | Verified   | gct | ggt | gtg | 1 | G | T |
| TCGA-29-1763 | SUSD4_ENS  | ENST00000343846 | p.E262D  | c.786G>T   | Unverified | TGT | GAG | CGC | 3 | G | T |
| TCGA-13-0760 | SUV420H1   | NM_017635.3     | p.K761N  | c.2283G>T  | Verified   | gca | aag | ctt | 3 | G | T |
| TCGA-13-0791 | SV2A       | ENST00000369146 | p.G319W  | c.955G>T   | Verified   | TAT | GGG | TGG | 1 | G | T |
| TCGA-13-1507 | SV2A       | ENST00000369146 | p.T399T  | c.1197G>T  | Verified   | AAG | ACG | ATT | 3 | G | T |
| TCGA-24-1563 | SV2A       | ENST00000369146 | p.W454C  | c.1362G>T  | Verified   | GTG | TGG | TTC | 3 | G | T |
| TCGA-61-1733 | SV2C       | ENST00000502798 | p.D119Y  | c.355G>T   | Unverified | AAG | GAC | CGG | 1 | G | T |
| TCGA-61-1733 | SV2C       | ENST00000502798 | p.D119Y  | c.355G>T   | Unverified | AAG | GAC | CGG | 1 | G | T |
| TCGA-61-1910 | SV2C       | ENST00000502798 | p.V30L   | c.88G>T    | Unverified | AAG | GTG | AAT | 1 | G | T |
| TCGA-29-1777 | SWAP70     | ENST00000318950 | p.C94F   | c.281G>T   | Unverified | ATG | TGT | TGG | 2 | G | T |
| TCGA-23-1124 | SYN2       | ENST00000341648 | p.L349L  | c.1047G>T  | Verified   | CTG | CTG | TCC | 3 | G | T |
| TCGA-13-1498 | SYNE1      | ENST00000265368 | p.E3409* | c.10225G>T | Unverified | ATG | GAA | GCC | 1 | G | T |
| TCGA-13-0919 | SYNE1      | ENST00000265368 | p.E5246D | c.15738G>T | Verified   | GCA | GAG | CTC | 3 | G | T |
| TCGA-13-1498 | SYNE1_ENS  | ENST00000265368 | p.E3409* | c.10225G>T | Unverified | ATG | GAA | GCC | 1 | G | T |
| TCGA-13-0919 | SYNE1_ENS  | ENST00000265368 | p.E5246D | c.15738G>T | Verified   | GCA | GAG | CTC | 3 | G | T |
| TCGA-13-0893 | SYNGAP1    | ENST00000418600 | p.S1088I | c.3263G>T  | Unverified | TCC | AGC | GGG | 2 | G | T |
| TCGA-13-0893 | SYNGAP1_EI | ENST00000293748 | p.S1088I | c.3263G>T  | Unverified | TCC | AGC | GGG | 2 | G | T |
| TCGA-04-1343 | SYT9       | ENST00000318881 | p.L403L  | c.1209G>T  | Verified   | CGA | CTG | AAG | 3 | G | T |
| TCGA-29-1777 | SZT2       | ENST00000372442 | p.D634Y  | c.1900G>T  | Unverified | TCA | GAC | GTA | 1 | G | T |
| TCGA-29-1777 | SZT2_ENST  | ENST00000562955 | p.D1476Y | c.4426G>T  | Unverified | TCA | GAC | GTA | 1 | G | T |

|              |            |                 |          |             |            |     |     |     |   |   |   |
|--------------|------------|-----------------|----------|-------------|------------|-----|-----|-----|---|---|---|
| TCGA-13-0791 | TAAR6      | ENST00000275198 | p.R254I  | c.761G>T    | Verified   | GAG | AGA | AAA | 2 | G | T |
| TCGA-13-0755 | TACC2      | ENST00000369005 | p.A1755S | c.5263G>T   | Verified   | AAG | GCT | CCG | 1 | G | T |
| TCGA-24-1431 | TACR2      | ENST00000373306 | p.D278Y  | c.832G>T    | Unverified | GAG | GAC | ATC | 1 | G | T |
| TCGA-29-1763 | TAGAP      | ENST00000367066 | p.G180V  | c.539G>T    | Unverified | ATG | GGT | GCT | 2 | G | T |
| TCGA-24-2288 | TANC1      | ENST00000263635 | p.G1449V | c.4346G>T   | Unverified | CCT | GGC | TTA | 2 | G | T |
| TCGA-09-1674 | TARDBP     | ENST00000240185 | p.G245*  | c.733G>T    | Unverified | TGT | GGA | GAG | 1 | G | T |
| TCGA-20-1687 | TATDN2     | ENST00000287652 | p.A690S  | c.2068G>T   | Unverified | GAG | GCC | CGG | 1 | G | T |
| TCGA-04-1347 | TBC1D8     | ENST00000409318 | p.M425I  | c.1275G>T   | Verified   | GAC | ATG | GCT | 3 | G | T |
| TCGA-13-0906 | TBCCD1     | ENST00000338733 | p.V115L  | c.343G>T    | Verified   | TCA | GTG | GAC | 1 | G | T |
| TCGA-13-0923 | TBX18      | ENST00000369663 | p.C395F  | c.1184G>T   | Verified   | TCT | TGC | TCC | 2 | G | T |
| TCGA-61-2012 | TBX3       | ENST00000257566 | p.D27Y   | c.79G>T     | Verified   | CCG | GAC | TTC | 1 | G | T |
| TCGA-29-1761 | TBX5       | ENST00000310346 | p.R246I  | c.737G>T    | Unverified | CAC | AGA | ATG | 2 | G | T |
| TCGA-29-1761 | TBX5_ENSTC | ENST00000526441 | p.R246I  | c.737G>T    | Unverified | CAC | AGA | ATG | 2 | G | T |
| TCGA-23-1117 | TCF4       | ENST00000356073 | p.G658*  | c.1972G>T   | Verified   | ATG | GGA | GAC | 1 | G | T |
| TCGA-23-1117 | TCF4       | ENST00000356073 | p.G658*  | c.1972G>T   | Verified   | ATG | GGA | GAC | 1 | G | T |
| TCGA-09-2044 | TCN1       | ENST00000257264 | p.K121N  | c.363G>T    | Verified   | GAC | AAG | CTA | 3 | G | T |
| TCGA-09-1665 | TCP11      | ENST00000373979 | p.G334C  | c.1000G>T   | Verified   | ATG | GGC | CTT | 1 | G | T |
| TCGA-13-0807 | TCP11      | ENST00000373979 | p.V270F  | c.808G>T    | Verified   | ACC | GTC | ATG | 1 | G | T |
| TCGA-23-1022 | TDG        | ENST00000392872 | p.D202Y  | c.604G>T    | Verified   | AAA | GAT | CTC | 1 | G | T |
| TCGA-30-1718 | TDRD1      | ENST00000251864 | p.?      | c.2770+1G>T | Unverified | CAA | GCT | ACC | 1 | G | T |
| TCGA-23-1118 | TDRD9      | ENST00000339063 | p.A478A  | c.1434G>T   | Verified   | ATG | GCG | GTG | 3 | G | T |
| TCGA-13-0916 | TDRKH      | ENST00000368822 | p.G22V   | c.65G>T     | Verified   | CTT | GGG | ATC | 2 | G | T |
| TCGA-24-0979 | TECTA      | ENST00000392793 | p.V1618L | c.4852G>T   | Verified   | AAA | GTG | TGC | 1 | G | T |
| TCGA-20-1687 | TECTA      | ENST00000392793 | p.Q945H  | c.2835G>T   | Unverified | TGC | CAG | AGT | 3 | G | T |
| TCGA-13-1481 | TEK        | ENST00000380036 | p.V1014L | c.3040G>T   | Verified   | AGT | GTG | TAC | 1 | G | T |
| TCGA-09-1665 | TEKT1      | ENST00000338694 | p.R119M  | c.356G>T    | Verified   | TAC | AGG | GAG | 2 | G | T |
| TCGA-30-1855 | TESK2      | NM_007170       | p.D2Y    | c.4G>T      | Unverified | atg | gat | cgg | 1 | G | T |
| TCGA-29-1777 | TEX14      | ENST00000349033 | p.R1355I | c.4064G>T   | Unverified | GAG | AGA | GCT | 2 | G | T |
| TCGA-29-1777 | TEX14_ENST | ENST00000240361 | p.R1401I | c.4202G>T   | Unverified | GAG | AGA | GCT | 2 | G | T |
| TCGA-25-2393 | TF         | ENST00000402696 | p.W363C  | c.1089G>T   | Verified   | AAG | TGG | TGT | 3 | G | T |
| TCGA-13-0761 | TFDP1      | ENST00000375370 | p.E208*  | c.622G>T    | Verified   | gtg | gaa | aga | 1 | G | T |
| TCGA-13-0761 | TFDP1      | ENST00000375370 | p.E208*  | c.622G>T    | Verified   | gtg | gaa | aga | 1 | G | T |
| TCGA-13-0883 | TG         | ENST00000220616 | p.G2341V | c.7022G>T   | Verified   | TTC | GGC | TTC | 2 | G | T |
| TCGA-25-2393 | TGFBR1     | ENST00000374994 | p.S241S  | c.723G>T    | Verified   | cgt | tcg | tgg | 3 | G | T |

|              |           |                 |          |           |            |     |     |     |   |   |   |
|--------------|-----------|-----------------|----------|-----------|------------|-----|-----|-----|---|---|---|
| TCGA-24-2267 | TGIF1     | ENST00000330513 | p.V176L  | c.526G>T  | Verified   | tct | gtg | cag | 1 | G | T |
| TCGA-24-1563 | TGM6      | ENST00000202625 | p.R293R  | c.879G>T  | Verified   | ACA | CGG | GTC | 3 | G | T |
| TCGA-24-1849 | TGM7      | ENST00000452443 | p.L508L  | c.1524G>T | Unverified | CAG | CTG | CTG | 3 | G | T |
| TCGA-29-1777 | THAP9     | ENST00000302236 | p.R524S  | c.1572G>T | Unverified | AGT | AGG | AAC | 3 | G | T |
| TCGA-29-1762 | THEM5     | ENST00000368817 | p.R96R   | c.288G>T  | Unverified | ATC | CGG | GGA | 3 | G | T |
| TCGA-13-1488 | THEMIS    | ENST00000368248 | p.R19S   | c.57G>T   | Verified   | CCC | AGG | GTT | 3 | G | T |
| TCGA-13-0755 | THSD1     | ENST00000258613 | p.V125L  | c.373G>T  | Verified   | AAG | GTG | GAA | 1 | G | T |
| TCGA-24-2280 | TIE1      | ENST00000372476 | p.V1041F | c.3121G>T | Unverified | GGA | GTC | CTT | 1 | G | T |
| TCGA-09-2044 | TKTL2     | ENST00000280605 | p.C447F  | c.1340G>T | Verified   | AAT | TGT | ACT | 2 | G | T |
| TCGA-61-2113 | TLL1      | ENST00000061240 | p.V239F  | c.715G>T  | Verified   | GTT | GTT | CAT | 1 | G | T |
| TCGA-13-0904 | TLN1      | ENST00000314888 | p.L152L  | c.456G>T  | Verified   | TTG | CTG | CGA | 3 | G | T |
| TCGA-23-1031 | TLN1      | ENST00000314888 | p.Q2259H | c.6777G>T | Unverified | CTG | CAG | AAG | 3 | G | T |
| TCGA-24-1843 | TLR1      | ENST00000308979 | p.R18I   | c.53G>T   | Unverified | ATC | AGA | ATA | 2 | G | T |
| TCGA-13-0760 | TLR4      | ENST00000355622 | p.C40F   | c.119G>T  | Verified   | CAA | TGC | ATG | 2 | G | T |
| TCGA-30-1891 | TM4SF4    | ENST00000305354 | p.G181C  | c.541G>T  | Unverified | AAT | GGC | CTC | 1 | G | T |
| TCGA-29-1693 | TMEFF2    | ENST00000272771 | p.E126D  | c.378G>T  | Unverified | AGT | GAG | ATA | 3 | G | T |
| TCGA-29-1769 | TMEM131_F | ENST00000186436 | p.A664S  | c.1990G>T | Unverified | AAG | GCT | GTG | 1 | G | T |
| TCGA-23-1118 | TMEM132B  | ENST00000299308 | p.L431F  | c.1293G>T | Verified   | GTT | TTG | AAC | 3 | G | T |
| TCGA-04-1347 | TMEM132D  | ENST00000422113 | p.E953*  | c.2857G>T | Verified   | TTC | GAG | GAG | 1 | G | T |
| TCGA-09-2051 | TMEM156   | ENST00000381938 | p.M171I  | c.513G>T  | Unverified | ATC | ATG | GAG | 3 | G | T |
| TCGA-13-1497 | TMEM181   | ENST00000367090 | p.S191I  | c.572G>T  | Verified   | AAT | AGC | AAA | 2 | G | T |
| TCGA-13-1512 | TMEM198   | ENST00000344458 | p.V113L  | c.337G>T  | Verified   | CTA | GTG | CGC | 1 | G | T |
| TCGA-24-1845 | TMEM61    | ENST00000371268 | p.A51S   | c.151G>T  | Unverified | CTG | GCC | CCA | 1 | G | T |
| TCGA-25-2042 | TMEM86A   | ENST00000280734 | p.V123L  | c.367G>T  | Verified   | CTG | GTG | ATG | 1 | G | T |
| TCGA-13-0886 | TMEM97    | ENST00000226230 | p.S20I   | c.59G>T   | Unverified | CTC | AGC | CAC | 2 | G | T |
| TCGA-23-1117 | TMOD4     | ENST00000295314 | p.G237V  | c.710G>T  | Verified   | AGT | GGT | GAC | 2 | G | T |
| TCGA-23-1117 | TMOD4     | ENST00000295314 | p.G237V  | c.710G>T  | Verified   | AGT | GGT | GAC | 2 | G | T |
| TCGA-61-1998 | TMPO_ENST | ENST00000266732 | p.E496*  | c.1486G>T | Verified   | CAT | GAA | TCT | 1 | G | T |
| TCGA-25-1313 | TMPRSS15  | ENST00000284885 | p.C354F  | c.1061G>T | Verified   | TTT | TGT | TTC | 2 | G | T |
| TCGA-24-1464 | TMTC2     | ENST00000321196 | p.S7I    | c.20G>T   | Verified   | GTG | AGC | AGC | 2 | G | T |
| TCGA-61-2012 | TMTC2     | ENST00000321196 | p.K614N  | c.1842G>T | Verified   | GGA | AAG | CTG | 3 | G | T |
| TCGA-24-2289 | TNFRSF10A | ENST00000221132 | p.C132F  | c.395G>T  | Unverified | TTG | TGT | CCA | 2 | G | T |
| TCGA-13-0890 | TNIK      | ENST00000436636 | p.Q457H  | c.1371G>T | Verified   | AGA | CAG | TTA | 3 | G | T |
| TCGA-09-2051 | TNKS1BP1  | ENST00000358252 | p.D922Y  | c.2764G>T | Unverified | CAG | GAT | GCC | 1 | G | T |

|              |            |                 |          |            |            |     |     |     |   |   |   |
|--------------|------------|-----------------|----------|------------|------------|-----|-----|-----|---|---|---|
| TCGA-30-1855 | TNNI3K     | ENST00000326637 | p.M798I  | c.2394G>T  | Unverified | gag | atg | aaa | 3 | G | T |
| TCGA-61-1737 | TNPO3      | ENST00000265388 | p.C665F  | c.1994G>T  | Unverified | agg | tgc | ctg | 2 | G | T |
| TCGA-61-1737 | TNPO3_ENS  | ENST00000393245 | p.C699F  | c.2096G>T  | Unverified | AGG | TGC | CTG | 2 | G | T |
| TCGA-23-2078 | TNR        | ENST00000367674 | p.K11N   | c.33G>T    | Verified   | CTG | AAG | AAC | 3 | G | T |
| TCGA-24-1435 | TNRC6A     | ENST00000395799 | p.G1061V | c.3182G>T  | Verified   | TGG | GGT | GAG | 2 | G | T |
| TCGA-23-1118 | TNRC6C     | ENST00000301624 | p.D566Y  | c.1696G>T  | Verified   | GAG | GAC | AAG | 1 | G | T |
| TCGA-13-1488 | TNS1       | ENST00000171887 | p.K249N  | c.747G>T   | Verified   | CTG | AAG | TGC | 3 | G | T |
| TCGA-13-0916 | TNXB_ENST  | ENST00000375247 | p.A1070S | c.3208G>T  | Verified   | ACC | GCC | CAG | 1 | G | T |
| TCGA-24-1469 | TOP1       | ENST00000361337 | p.A96S   | c.286G>T   | Verified   | cga | gcc | tct | 1 | G | T |
| TCGA-04-1651 | TP53       | ENST00000269305 | p.E343*  | c.1027G>T  | Unverified | CGA | GAG | CTG | 1 | G | T |
| TCGA-04-1651 | TP53       | ENST00000269305 | p.E343*  | c.1027G>T  | Unverified | CGA | GAG | CTG | 1 | G | T |
| TCGA-09-1665 | TP53       | ENST00000269305 | p.D259Y  | c.775G>T   | Verified   | GAA | GAC | TCC | 1 | G | T |
| TCGA-13-0919 | TP53       | ENST00000269305 | p.V157F  | c.469G>T   | Verified   | CGC | GTC | CGC | 1 | G | T |
| TCGA-61-1915 | TP53       | ENST00000269305 | p.E221*  | c.661G>T   | Unverified | TAT | GAG | CCG | 1 | G | T |
| TCGA-61-2009 | TP53       | ENST00000269305 | p.V157F  | c.469G>T   | Verified   | CGC | GTC | CGC | 1 | G | T |
| TCGA-13-0791 | TP53       | ENST00000269305 | p.R273L  | c.818G>T   | Verified   | GTG | CGT | GTT | 2 | G | T |
| TCGA-13-1512 | TP53       | ENST00000269305 | p.R273L  | c.818G>T   | Verified   | GTG | CGT | GTT | 2 | G | T |
| TCGA-23-1120 | TP53       | ENST00000269305 | p.R110L  | c.329G>T   | Verified   | TTC | CGT | CTG | 2 | G | T |
| TCGA-61-2113 | TP53       | ENST00000269305 | p.G266V  | c.797G>T   | Verified   | CTG | GGA | CGG | 2 | G | T |
| TCGA-13-0755 | TP53       | ENST00000269305 | p.T125T  | c.375G>T   | Verified   | TGC | ACG | TAC | 3 | G | T |
| TCGA-24-2262 | TP53       | ENST00000269305 | p.K132N  | c.396G>T   | Verified   | AAC | AAG | ATG | 3 | G | T |
| TCGA-25-2400 | TP53       | ENST00000269305 | p.?      | c.672+1G>T | Verified   | CCT | GAG | GTT | 3 | G | T |
| TCGA-36-1577 | TP53       | ENST00000269305 | p.?      | c.672+1G>T | Verified   | CCT | GAG | GTT | 3 | G | T |
| TCGA-04-1651 | TP53_ENSTC | ENST00000269305 | p.E343*  | c.1027G>T  | Unverified | CGA | GAG | CTG | 1 | G | T |
| TCGA-04-1651 | TP53_ENSTC | ENST00000269305 | p.E343*  | c.1027G>T  | Unverified | CGA | GAG | CTG | 1 | G | T |
| TCGA-61-1915 | TP53_ENSTC | ENST00000269305 | p.E221*  | c.661G>T   | Unverified | TAT | GAG | CCG | 1 | G | T |
| TCGA-23-1120 | TP53_ENSTC | ENST00000269305 | p.R110L  | c.329G>T   | Verified   | TTC | CGT | CTG | 2 | G | T |
| TCGA-36-1577 | TP53_ENSTC | ENST00000269305 | p.?      | c.672+1G>T | Verified   | CCT | GAG | GTT | 3 | G | T |
| TCGA-61-1915 | TP53_ENSTC | ENST00000413465 | p.E221*  | c.661G>T   | Unverified | TAT | GAG | CCG | 1 | G | T |
| TCGA-23-1120 | TP53_ENSTC | ENST00000413465 | p.R110L  | c.329G>T   | Verified   | TTC | CGT | CTG | 2 | G | T |
| TCGA-36-1577 | TP53_ENSTC | ENST00000413465 | p.?      | c.672+1G>T | Verified   | CCT | GAG | GTT | 3 | G | T |
| TCGA-61-1915 | TP53_ENSTC | ENST00000545858 | p.E128*  | c.382G>T   | Unverified | TAT | GAG | CCG | 1 | G | T |
| TCGA-36-1577 | TP53_ENSTC | ENST00000545858 | p.?      | c.393+1G>T | Verified   | CCT | GAG | GTT | 3 | G | T |
| TCGA-13-0807 | TP73       | ENST00000378295 | p.Q133H  | c.399G>T   | Verified   | CAG | CAG | TCC | 3 | G | T |

|              |            |                 |          |            |            |     |     |     |   |   |   |
|--------------|------------|-----------------|----------|------------|------------|-----|-----|-----|---|---|---|
| TCGA-61-2095 | TPBG       | ENST00000369750 | p.G136C  | c.406G>T   | Unverified | GCG | GGC | GCC | 1 | G | T |
| TCGA-09-0369 | TRAF3IP3   | NM_025228.1     | p.?      | c.855+1G>T | Verified   | aca | cag | cga | 3 | G | T |
| TCGA-09-0369 | TRAF3IP3   | NM_025228.1     | p.?      | c.855+1G>T | Verified   | aca | cag | cga | 3 | G | T |
| TCGA-29-1695 | TRDMT1     | ENST00000377799 | p.V291V  | c.873G>T   | Unverified | tcc | gtg | tgc | 3 | G | T |
| TCGA-13-0885 | TRIM13     | ENST00000420995 | p.V401L  | c.1201G>T  | Verified   | ttt | gtg | tgc | 1 | G | T |
| TCGA-29-1777 | TRIM17     | ENST00000366697 | p.C224F  | c.671G>T   | Unverified | gcc | tgc | ctg | 2 | G | T |
| TCGA-29-1777 | TRIM17_EN! | ENST00000456946 | p.C224F  | c.671G>T   | Unverified | GCC | TGC | CTG | 2 | G | T |
| TCGA-24-1616 | TRIM43_EN! | ENST00000272395 | p.C30F   | c.89G>T    | Unverified | TGC | TGT | GGG | 2 | G | T |
| TCGA-13-0913 | TRIM63     | ENST00000374272 | p.A157S  | c.469G>T   | Unverified | GTG | GCC | CCA | 1 | G | T |
| TCGA-29-1777 | TRIO       | ENST00000344204 | p.V706L  | c.2116G>T  | Unverified | gcc | gtg | cag | 1 | G | T |
| TCGA-61-1737 | TRIOBP_EN! | ENST00000406386 | p.E876D  | c.2628G>T  | Unverified | AAG | GAG | AAT | 3 | G | T |
| TCGA-23-1022 | TRIP4      | ENST00000261884 | p.?      | c.618+1G>T | Verified   | ACT | CTG | GTG | 3 | G | T |
| TCGA-29-1703 | TRPC4      | ENST00000379705 | p.V839L  | c.2515G>T  | Unverified | TTT | GTG | ACC | 1 | G | T |
| TCGA-30-1855 | TRPC4      | ENST00000379705 | p.E648*  | c.1942G>T  | Unverified | TTT | GAA | GAA | 1 | G | T |
| TCGA-29-1703 | TRPC4_EN!  | ENST00000379681 | p.V844L  | c.2530G>T  | Unverified | TTT | GTG | ACC | 1 | G | T |
| TCGA-30-1855 | TRPC4_EN!  | ENST00000379681 | p.E648*  | c.1942G>T  | Unverified | TTT | GAA | GAA | 1 | G | T |
| TCGA-25-2392 | TRPM3      | ENST00000377106 | p.V971V  | c.2913G>T  | Verified   | TTA | GTG | GCA | 3 | G | T |
| TCGA-13-0913 | TRPV5      | ENST00000265310 | p.R355L  | c.1064G>T  | Verified   | TTT | CGT | GGT | 2 | G | T |
| TCGA-23-1118 | TRRAP      | ENST00000355540 | p.V3329V | c.9987G>T  | Verified   | GCG | GTG | TCC | 3 | G | T |
| TCGA-24-1845 | TRRAP      | ENST00000355540 | p.Q1381H | c.4143G>T  | Unverified | CCT | CAG | TCC | 3 | G | T |
| TCGA-24-1845 | TRRAP_EN!  | ENST00000359863 | p.Q1381H | c.4143G>T  | Unverified | CCT | CAG | TCC | 3 | G | T |
| TCGA-24-0975 | TSEN54     | ENST00000333213 | p.V498F  | c.1492G>T  | Unverified | GAT | GTC | CCT | 1 | G | T |
| TCGA-61-2012 | TSHZ2      | ENST00000371497 | p.K887N  | c.2661G>T  | Verified   | TCT | AAG | TTT | 3 | G | T |
| TCGA-24-2267 | TSPAN10    | ENST00000328585 | p.V254F  | c.760G>T   | Verified   | TCT | GTC | AAC | 1 | G | T |
| TCGA-13-1497 | TSPAN9     | ENST00000011898 | p.G29*   | c.85G>T    | Verified   | CTG | GGA | GTG | 1 | G | T |
| TCGA-61-1738 | TSPEAR     | ENST00000323084 | p.A44S   | c.130G>T   | Unverified | GGC | GCC | ACA | 1 | G | T |
| TCGA-61-1738 | TSPEAR     | ENST00000323084 | p.A44S   | c.130G>T   | Unverified | GGC | GCC | ACA | 1 | G | T |
| TCGA-04-1337 | TSPYL1     | ENST00000368608 | p.E225*  | c.673G>T   | Unverified | CAT | GAG | GCT | 1 | G | T |
| TCGA-61-1910 | TTC12      | ENST00000529221 | p.L413L  | c.1239G>T  | Unverified | GCT | CTG | GAA | 3 | G | T |
| TCGA-29-1691 | TTC21B     | ENST00000243344 | p.?      | c.552+1G>T | Unverified | GGT | AAG | GCA | 3 | G | T |
| TCGA-29-1777 | TTC30A     | ENST00000355689 | p.G623V  | c.1868G>T  | Unverified | TAT | GGC | ACA | 2 | G | T |
| TCGA-24-1616 | TTC37      | ENST00000358746 | p.A680S  | c.2038G>T  | Verified   | ATG | GCA | AAA | 1 | G | T |
| TCGA-24-1616 | TTC37      | ENST00000358746 | p.E630*  | c.1888G>T  | Verified   | CCA | GAA | TCC | 1 | G | T |
| TCGA-24-2290 | TTF1       | ENST00000334270 | p.K747N  | c.2241G>T  | Verified   | ACC | AAG | AGG | 3 | G | T |

|              |                     |                 |           |              |            |     |     |     |   |   |   |
|--------------|---------------------|-----------------|-----------|--------------|------------|-----|-----|-----|---|---|---|
| TCGA-24-2290 | TTF1                | ENST00000334270 | p.K747N   | c.2241G>T    | Verified   | ACC | AAG | AGG | 3 | G | T |
| TCGA-13-0886 | TTLL4               | ENST00000392102 | p.R1008R  | c.3024G>T    | Unverified | GTT | CGG | ATT | 3 | G | T |
| TCGA-13-0904 | TTLL8               | ENST00000266182 | p.V374V   | c.1122G>T    | Verified   | TGG | GTG | GTC | 3 | G | T |
| TCGA-25-2042 | TTN                 | NM_003319       | p.E3995*  | c.11983G>T   | Verified   | att | gag | tct | 1 | G | T |
| TCGA-30-1855 | TTN                 | NM_003319       | p.E8152*  | c.24454G>T   | Unverified | aaa | gag | tac | 1 | G | T |
| TCGA-61-1737 | TTN                 | NM_003319       | p.V23577L | c.70729G>T   | Unverified | aaa | gta | gat | 1 | G | T |
| TCGA-09-0369 | TTN                 | NM_003319       | p.G5678V  | c.17033G>T   | Verified   | ggt | ggg | gtg | 2 | G | T |
| TCGA-09-0369 | TTN                 | NM_003319       | p.G5678V  | c.17033G>T   | Verified   | ggt | ggg | gtg | 2 | G | T |
| TCGA-13-0755 | TTN                 | NM_003319       | p.E3925D  | c.11775G>T   | Verified   | tat | gag | ccc | 3 | G | T |
| TCGA-23-1021 | TTN                 | NM_003319       | p.V11423V | c.34269G>T   | Verified   | acc | gtg | aga | 3 | G | T |
| TCGA-30-1855 | TTN_ENST00000342175 | ENST00000342175 | p.E8344*  | c.25030G>T   | Unverified | AAA | GAG | TAC | 1 | G | T |
| TCGA-61-1737 | TTN_ENST00000342175 | ENST00000342175 | p.V23769L | c.71305G>T   | Unverified | AAA | GTA | GAT | 1 | G | T |
| TCGA-30-1891 | TTN_ENST00000342175 | ENST00000342175 | p.R19550L | c.58649G>T   | Unverified | AGA | CGA | GAC | 2 | G | T |
| TCGA-24-1846 | TTN_ENST00000342992 | ENST00000342992 | p.E6708*  | c.20122G>T   | Unverified | GCC | GAA | ATG | 1 | G | T |
| TCGA-30-1855 | TTN_ENST00000342992 | ENST00000342992 | p.E14649* | c.43945G>T   | Unverified | AAA | GAG | TAC | 1 | G | T |
| TCGA-61-1737 | TTN_ENST00000342992 | ENST00000342992 | p.V30074L | c.90220G>T   | Unverified | AAA | GTA | GAT | 1 | G | T |
| TCGA-61-1740 | TTN_ENST00000342992 | ENST00000342992 | p.?       | c.14857+1G>T | Unverified | AAA | GAA | CCC | 1 | G | T |
| TCGA-30-1855 | TTN_ENST00000356127 | ENST00000356127 | p.E14649* | c.43945G>T   | Unverified | AAA | GAG | TAC | 1 | G | T |
| TCGA-61-1737 | TTN_ENST00000356127 | ENST00000356127 | p.V30072L | c.90214G>T   | Unverified | AAA | GTA | GAT | 1 | G | T |
| TCGA-09-0369 | TTN_ENST00000356127 | ENST00000356127 | p.G12175V | c.36524G>T   | Verified   | GGT | GGG | GTG | 2 | G | T |
| TCGA-09-0369 | TTN_ENST00000356127 | ENST00000356127 | p.G12175V | c.36524G>T   | Verified   | GGT | GGG | GTG | 2 | G | T |
| TCGA-30-1891 | TTN_ENST00000356127 | ENST00000356127 | p.R25853L | c.77558G>T   | Unverified | AGA | CGA | GAC | 2 | G | T |
| TCGA-13-1497 | TTN_ENST00000356127 | ENST00000356127 | p.K3558N  | c.10674G>T   | Verified   | CCT | AAG | TCC | 3 | G | T |
| TCGA-23-1021 | TTN_ENST00000356127 | ENST00000356127 | p.V17918V | c.53754G>T   | Verified   | ACC | GTG | AGA | 3 | G | T |
| TCGA-30-1855 | TTN_ENST00000359218 | ENST00000359218 | p.E8277*  | c.24829G>T   | Unverified | AAA | GAG | TAC | 1 | G | T |
| TCGA-61-1737 | TTN_ENST00000359218 | ENST00000359218 | p.V23702L | c.71104G>T   | Unverified | AAA | GTA | GAT | 1 | G | T |
| TCGA-30-1855 | TUBA1B              | ENST00000336023 | p.?       | c.226+1G>T   | Unverified | ATT | GAT | GAA | 1 | G | T |
| TCGA-30-1855 | TUBB1               | ENST00000217133 | p.E383D   | c.1149G>T    | Unverified | TCT | GAG | CAT | 3 | G | T |
| TCGA-24-2288 | TUBB8               | ENST00000328974 | p.G308C   | c.922G>T     | Unverified | CAC | GGC | CGC | 1 | G | T |
| TCGA-24-1470 | TUBG1               | ENST00000251413 | p.R124L   | c.371G>T     | Verified   | GAC | CGG | GAG | 2 | G | T |
| TCGA-04-1361 | TXLNA               | ENST00000373609 | p.G509V   | c.1526G>T    | Verified   | CCT | GGG | GCT | 2 | G | T |
| TCGA-04-1361 | TXLNA               | ENST00000373609 | p.G509V   | c.1526G>T    | Verified   | CCT | GGG | GCT | 2 | G | T |
| TCGA-09-0369 | TXNDC3              | ENST00000199447 | p.G265V   | c.794G>T     | Verified   | CCT | GGA | ATG | 2 | G | T |
| TCGA-09-0369 | TXNDC3              | ENST00000199447 | p.G265V   | c.794G>T     | Verified   | CCT | GGA | ATG | 2 | G | T |

|              |           |                 |          |            |            |     |     |     |   |   |   |
|--------------|-----------|-----------------|----------|------------|------------|-----|-----|-----|---|---|---|
| TCGA-04-1367 | TXNL4B    | ENST00000268483 | p.L115F  | c.345G>T   | Verified   | GAT | TTG | ATT | 3 | G | T |
| TCGA-23-1117 | UBE2E3    | ENST00000392415 | p.A22A   | c.66G>T    | Verified   | gat | gcg | gac | 3 | G | T |
| TCGA-23-1117 | UBE2E3    | ENST00000392415 | p.A22A   | c.66G>T    | Verified   | gat | gcg | gac | 3 | G | T |
| TCGA-13-1501 | UBE2Q2    | ENST00000267938 | p.?      | c.448-1G>T | Verified   | GAA | GAT | ATA | 1 | G | T |
| TCGA-13-1501 | UBE2Q2    | ENST00000267938 | p.?      | c.448-1G>T | Verified   | GAA | GAT | ATA | 1 | G | T |
| TCGA-24-2288 | UBP1      | ENST00000283629 | p.S36I   | c.107G>T   | Unverified | TAC | AGC | ATG | 2 | G | T |
| TCGA-24-1470 | UBQLN2    | ENST00000338222 | p.G289V  | c.866G>T   | Verified   | GGG | GGT | AAT | 2 | G | T |
| TCGA-24-1422 | UBR3      | ENST00000392632 | p.A328S  | c.982G>T   | Unverified | GGT | GCA | AGC | 1 | G | T |
| TCGA-24-1422 | UBR3_ENST | ENST00000418381 | p.A1475S | c.4423G>T  | Unverified | GGT | GCA | AGC | 1 | G | T |
| TCGA-24-1469 | UBR4      | ENST00000375254 | p.R3611L | c.10832G>T | Unverified | GCT | CGC | TGG | 2 | G | T |
| TCGA-61-1914 | UBXN6     | ENST00000301281 | p.E107*  | c.319G>T   | Unverified | TCT | GAG | CCC | 1 | G | T |
| TCGA-13-0884 | UBXN7     | ENST00000296328 | p.D246Y  | c.736G>T   | Verified   | TTA | GAT | GTA | 1 | G | T |
| TCGA-09-1674 | UGT1A1    | ENST00000305208 | p.G493C  | c.1477G>T  | Unverified | att | ggt | ttc | 1 | G | T |
| TCGA-09-1674 | UGT1A10   | ENST00000344644 | p.G490C  | c.1468G>T  | Unverified | ATT | GGT | TTC | 1 | G | T |
| TCGA-09-1674 | UGT1A3    | ENST00000482026 | p.G494C  | c.1480G>T  | Unverified | ATT | GGT | TTC | 1 | G | T |
| TCGA-09-1674 | UGT1A4    | ENST00000373409 | p.G494C  | c.1480G>T  | Unverified | ATT | GGT | TTC | 1 | G | T |
| TCGA-09-1674 | UGT1A5    | ENST00000373414 | p.G494C  | c.1480G>T  | Unverified | ATT | GGT | TTC | 1 | G | T |
| TCGA-09-1674 | UGT1A6    | ENST00000305139 | p.G492C  | c.1474G>T  | Unverified | ATT | GGT | TTC | 1 | G | T |
| TCGA-09-1674 | UGT1A7    | ENST00000373426 | p.G490C  | c.1468G>T  | Unverified | att | ggt | ttc | 1 | G | T |
| TCGA-09-1674 | UGT1A8    | ENST00000373450 | p.G490C  | c.1468G>T  | Unverified | ATT | GGT | TTC | 1 | G | T |
| TCGA-09-1674 | UGT1A9    | ENST00000354728 | p.G490C  | c.1468G>T  | Unverified | att | ggt | ttc | 1 | G | T |
| TCGA-04-1651 | UGT2B4    | ENST00000305107 | p.G522V  | c.1565G>T  | Unverified | ACA | GGA | AAG | 2 | G | T |
| TCGA-04-1651 | UGT2B4    | ENST00000305107 | p.G522V  | c.1565G>T  | Unverified | ACA | GGA | AAG | 2 | G | T |
| TCGA-13-0924 | UGT3A1    | ENST00000274278 | p.L455L  | c.1365G>T  | Verified   | CGG | CTG | GTG | 3 | G | T |
| TCGA-24-2280 | ULK2_ENST | ENST00000361658 | p.Q527H  | c.1581G>T  | Unverified | CTG | CAG | AGC | 3 | G | T |
| TCGA-24-2024 | UNC13B    | ENST00000378495 | p.A926S  | c.2776G>T  | Verified   | AAG | GCC | TGT | 1 | G | T |
| TCGA-29-1696 | UNC79     | ENST00000553484 | p.C800F  | c.2399G>T  | Unverified | AAT | TGT | TTC | 2 | G | T |
| TCGA-29-1696 | UNC79     | ENST00000553484 | p.C800F  | c.2399G>T  | Unverified | AAT | TGT | TTC | 2 | G | T |
| TCGA-24-1563 | USH1C     | ENST00000005226 | p.S174I  | c.521G>T   | Verified   | AAA | AGC | TCT | 2 | G | T |
| TCGA-13-0904 | USH2A     | ENST00000307340 | p.V2829L | c.8485G>T  | Verified   | TCT | GTG | ATT | 1 | G | T |
| TCGA-13-1507 | USH2A     | ENST00000307340 | p.R3258R | c.9774G>T  | Verified   | AAT | CGG | GTT | 3 | G | T |
| TCGA-24-1843 | USH2A     | ENST00000307340 | p.G3879G | c.11637G>T | Unverified | CTG | GGG | TCA | 3 | G | T |
| TCGA-24-1844 | USH2A     | ENST00000307340 | p.L4656F | c.13968G>T | Unverified | CTT | TTG | TGG | 3 | G | T |
| TCGA-13-1498 | USP19     | XM_496642.1     | p.L1182L | c.3546G>T  | Verified   | cag | ctg | ttg | 3 | G | T |



|              |             |                 |          |             |            |     |     |     |   |   |   |
|--------------|-------------|-----------------|----------|-------------|------------|-----|-----|-----|---|---|---|
| TCGA-04-1338 | USP34       | ENST00000398571 | p.G584G  | c.1752G>T   | Verified   | AGT | GGG | CAT | 3 | G | T |
| TCGA-29-1761 | USP35       | XM_290527.3     | p.L580L  | c.1740G>T   | Unverified | atc | ctg | gat | 3 | G | T |
| TCGA-29-1761 | USP35_ENST  | ENST00000529308 | p.L824L  | c.2472G>T   | Unverified | ATC | CTG | GAT | 3 | G | T |
| TCGA-29-1691 | USP40       | ENST00000450966 | p.A626S  | c.1876G>T   | Unverified | ATT | GCT | GAT | 1 | G | T |
| TCGA-29-1691 | USP40_ENST  | ENST00000450966 | p.A626S  | c.1876G>T   | Unverified | ATT | GCT | GAT | 1 | G | T |
| TCGA-04-1347 | USP43       | ENST00000285199 | p.R788R  | c.2364G>T   | Verified   | GTA | CGG | GGC | 3 | G | T |
| TCGA-24-1474 | USP45       | ENST00000500704 | p.G525*  | c.1573G>T   | Verified   | agt | gga | tcc | 1 | G | T |
| TCGA-29-1698 | USP6NL      | ENST00000277575 | p.A484S  | c.1450G>T   | Unverified | cac | gca | gct | 1 | G | T |
| TCGA-61-1904 | USP7        | ENST00000344836 | p.K1022N | c.3066G>T   | Unverified | ATG | AAG | CGA | 3 | G | T |
| TCGA-20-0990 | UTP14A      | ENST00000394422 | p.E269*  | c.805G>T    | Verified   | ttt | gag | cag | 1 | G | T |
| TCGA-23-1110 | VAR52       | ENST00000321897 | p.R754L  | c.2261G>T   | Verified   | CTT | CGC | TTT | 2 | G | T |
| TCGA-24-1103 | VAV3        | ENST00000370056 | p.E205*  | c.613G>T    | Verified   | GAA | GAA | AAA | 1 | G | T |
| TCGA-24-1847 | VAV3        | ENST00000370056 | p.R103L  | c.308G>T    | Unverified | GTT | CGT | GAC | 2 | G | T |
| TCGA-13-0924 | VCPIP1      | ENST00000310421 | p.G670C  | c.2008G>T   | Verified   | gat | ggt | gct | 1 | G | T |
| TCGA-24-2288 | VDR         | ENST00000395324 | p.D149Y  | c.445G>T    | Unverified | tcc | gac | ttc | 1 | G | T |
| TCGA-29-1777 | VIPAR       | ENST00000343765 | p.A254S  | c.760G>T    | Unverified | CTT | GCG | CTA | 1 | G | T |
| TCGA-04-1651 | VPS13B      | ENST00000358544 | p.A1013S | c.3037G>T   | Unverified | cag | gcc | tct | 1 | G | T |
| TCGA-04-1651 | VPS13B      | ENST00000358544 | p.A1013S | c.3037G>T   | Unverified | cag | gcc | tct | 1 | G | T |
| TCGA-13-1408 | VPS13B      | ENST00000358544 | p.M3637I | c.10911G>T  | Unverified | gca | atg | cac | 3 | G | T |
| TCGA-04-1651 | VPS13B_ENST | ENST00000357162 | p.A1013S | c.3037G>T   | Unverified | CAG | GCC | TCT | 1 | G | T |
| TCGA-04-1651 | VPS13B_ENST | ENST00000357162 | p.A1013S | c.3037G>T   | Unverified | CAG | GCC | TCT | 1 | G | T |
| TCGA-04-1649 | VPS33B      | ENST00000333371 | p.A142S  | c.424G>T    | Unverified | TGG | GCC | TTC | 1 | G | T |
| TCGA-25-1313 | VSNL1       | ENST00000295156 | p.E14D   | c.42G>T     | Verified   | ATG | GAG | GAC | 3 | G | T |
| TCGA-13-1501 | VWA2        | ENST00000298715 | p.S223I  | c.668G>T    | Verified   | CTC | AGC | AGC | 2 | G | T |
| TCGA-13-1501 | VWA2        | ENST00000298715 | p.S223I  | c.668G>T    | Verified   | CTC | AGC | AGC | 2 | G | T |
| TCGA-13-0890 | WAC         | ENST00000354911 | p.?      | c.1437+1G>T | Verified   | CCA | AAG | GTT | 3 | G | T |
| TCGA-13-0916 | WDFY3       | ENST00000295888 | p.A2831S | c.8491G>T   | Unverified | GAG | GCC | TGG | 1 | G | T |
| TCGA-09-2050 | WDPCP       | ENST00000272321 | p.G355C  | c.1063G>T   | Verified   | CTG | GGC | TGT | 1 | G | T |
| TCGA-13-1489 | WDR45L      | ENST00000392325 | p.P296P  | c.888G>T    | Verified   | TCT | CCG | TGC | 3 | G | T |
| TCGA-23-1809 | WDR49       | ENST00000308378 | p.E450D  | c.1350G>T   | Unverified | ATA | GAG | GAG | 3 | G | T |
| TCGA-04-1338 | WFDC1       | ENST00000219454 | p.G189V  | c.566G>T    | Unverified | GAT | GGG | CGA | 2 | G | T |
| TCGA-04-1342 | WHSC2       | ENST00000333877 | p.C471F  | c.1412G>T   | Unverified | CCG | TGC | CAG | 2 | G | T |
| TCGA-29-1766 | WIZ         | ENST00000263381 | p.G39G   | c.117G>T    | Unverified | GAG | GGG | GAA | 3 | G | T |
| TCGA-29-1766 | WIZ_ENSTO   | ENST00000389282 | p.G39G   | c.117G>T    | Unverified | GAG | GGG | GAA | 3 | G | T |

|              |            |                 |          |            |            |     |     |     |   |   |   |
|--------------|------------|-----------------|----------|------------|------------|-----|-----|-----|---|---|---|
| TCGA-25-2042 | WNT2B      | ENST00000369684 | p.A272S  | c.814G>T   | Verified   | GGG | GCT | GTG | 1 | G | T |
| TCGA-04-1331 | WNT7A      | ENST00000285018 | p.E171D  | c.513G>T   | Verified   | CGG | GAG | ATC | 3 | G | T |
| TCGA-61-1904 | WRAP73     | ENST00000270708 | p.V274L  | c.820G>T   | Unverified | GTG | GTG | TAT | 1 | G | T |
| TCGA-61-1733 | WSCD1      | ENST00000317744 | p.C178F  | c.533G>T   | Unverified | GCG | TGT | GCT | 2 | G | T |
| TCGA-61-1733 | WSCD1      | ENST00000317744 | p.C178F  | c.533G>T   | Unverified | GCG | TGT | GCT | 2 | G | T |
| TCGA-23-2078 | WWC3       | NM_015691.2     | p.S355I  | c.1064G>T  | Verified   | aaa | agc | ctg | 2 | G | T |
| TCGA-13-0762 | XIRP1      | ENST00000340369 | p.D334Y  | c.1000G>T  | Verified   | CCA | GAC | CTT | 1 | G | T |
| TCGA-13-0762 | XIRP1      | ENST00000340369 | p.D334Y  | c.1000G>T  | Verified   | CCA | GAC | CTT | 1 | G | T |
| TCGA-29-1770 | XRR1A      | ENST00000340360 | p.K590N  | c.1770G>T  | Unverified | CAA | AAG | AAA | 3 | G | T |
| TCGA-13-0807 | XYLB       | ENST00000207870 | p.G155V  | c.464G>T   | Verified   | GGT | GGT | GCT | 2 | G | T |
| TCGA-25-2398 | YBX1       | ENST00000321358 | p.G71V   | c.212G>T   | Verified   | AAC | GGA | TAT | 2 | G | T |
| TCGA-24-2035 | YSK4_ENST0 | ENST00000375845 | p.G353V  | c.1058G>T  | Verified   | CAT | GGT | AGT | 2 | G | T |
| TCGA-13-0913 | YWHAE      | ENST00000264335 | p.E15*   | c.43G>T    | Verified   | GCC | GAG | CAG | 1 | G | T |
| TCGA-25-1313 | ZAN        | ENST00000348028 | p.R2122S | c.6366G>T  | Verified   | AGC | AGG | AGA | 3 | G | T |
| TCGA-04-1343 | ZBTB20     | ENST00000357258 | p.A430S  | c.1288G>T  | Verified   | ACA | GCT | GGC | 1 | G | T |
| TCGA-61-2012 | ZBTB24     | ENST00000230122 | p.D417Y  | c.1249G>T  | Verified   | ATG | GAT | GTG | 1 | G | T |
| TCGA-24-0975 | ZBTB3      | ENST00000394807 | p.G27*   | c.79G>T    | Unverified | CGT | GGA | GCC | 1 | G | T |
| TCGA-25-2401 | ZBTB46     | ENST00000245663 | p.E199*  | c.595G>T   | Verified   | AAA | GAG | GAT | 1 | G | T |
| TCGA-29-1693 | ZBTB46     | ENST00000245663 | p.V35V   | c.105G>T   | Unverified | TGC | GTG | GTC | 3 | G | T |
| TCGA-61-1906 | ZC3H6      | ENST00000409871 | p.G216V  | c.647G>T   | Unverified | GTT | GGT | CGT | 2 | G | T |
| TCGA-61-1906 | ZC3H6      | ENST00000409871 | p.G216V  | c.647G>T   | Unverified | GTT | GGT | CGT | 2 | G | T |
| TCGA-23-1116 | ZCWPW2     | ENST00000383768 | p.S46I   | c.137G>T   | Verified   | TCA | AGT | GAG | 2 | G | T |
| TCGA-04-1530 | ZDHHC23    | ENST00000330212 | p.G201V  | c.602G>T   | Verified   | AGC | GGT | GAC | 2 | G | T |
| TCGA-24-1423 | ZEB2       | ENST00000303660 | p.G1120G | c.3360G>T  | Verified   | cag | ggg | tac | 3 | G | T |
| TCGA-13-1509 | ZFAND3     | ENST00000287218 | p.R156R  | c.468G>T   | Verified   | CGT | CGG | TGC | 3 | G | T |
| TCGA-09-1674 | ZFH4       | ENST00000521891 | p.A572S  | c.1714G>T  | Unverified | GCT | GCT | CAT | 1 | G | T |
| TCGA-24-2290 | ZFH4       | ENST00000521891 | p.G612V  | c.1835G>T  | Verified   | AGT | GGC | ATC | 2 | G | T |
| TCGA-24-2290 | ZFH4       | ENST00000521891 | p.G612V  | c.1835G>T  | Verified   | AGT | GGC | ATC | 2 | G | T |
| TCGA-20-1687 | ZFH4       | ENST00000521891 | p.M279I  | c.837G>T   | Unverified | TTA | ATG | TGT | 3 | G | T |
| TCGA-25-2391 | ZFP106     | ENST00000263805 | p.E115D  | c.345G>T   | Unverified | AGA | GAG | AGT | 3 | G | T |
| TCGA-24-1563 | ZFYVE26    | ENST00000347230 | p.K2236N | c.6708G>T  | Verified   | GGA | AAG | TAC | 3 | G | T |
| TCGA-13-0760 | ZHX1       | ENST00000395571 | p.E326*  | c.976G>T   | Verified   | GAG | GAA | CAG | 1 | G | T |
| TCGA-13-1489 | ZNF101     | ENST00000318110 | p.S379I  | c.1136G>T  | Verified   | TGC | AGT | TCC | 2 | G | T |
| TCGA-13-0893 | ZNF12      | ENST00000405858 | p.?      | c.238+1G>T | Unverified | CCA | GAT | GAA | 1 | G | T |

|              |            |                     |          |           |            |     |     |     |   |   |   |
|--------------|------------|---------------------|----------|-----------|------------|-----|-----|-----|---|---|---|
| TCGA-13-0923 | ZNF222     | ENST00000187879     | p.Q102H  | c.306G>T  | Verified   | TCC | CAG | ATT | 3 | G | T |
| TCGA-13-1507 | ZNF224     | ENST00000336976     | p.G452V  | c.1355G>T | Verified   | ACA | GGA | GAG | 2 | G | T |
| TCGA-25-1326 | ZNF232     | ENST00000250076     | p.E221*  | c.661G>T  | Verified   | ACA | GAA | GAT | 1 | G | T |
| TCGA-29-1777 | ZNF234_EN5 | ENST00000454662     | p.C197F  | c.590G>T  | Unverified | TTA | TGT | CAA | 2 | G | T |
| TCGA-20-1687 | ZNF256     | ENST00000282308     | p.G59V   | c.176G>T  | Unverified | GCA | GGG | GAT | 2 | G | T |
| TCGA-20-1687 | ZNF256_EN5 | ENST00000282308     | p.G59V   | c.176G>T  | Unverified | GCA | GGG | GAT | 2 | G | T |
| TCGA-04-1530 | ZNF292     | ENST00000339907     | p.L1422F | c.4266G>T | Verified   | AGC | TTG | CCT | 3 | G | T |
| TCGA-24-1435 | ZNF292     | ENST00000339907     | p.M2561I | c.7683G>T | Verified   | GAT | ATG | TCT | 3 | G | T |
| TCGA-23-1124 | ZNF326     | ENST00000340281     | p.D350Y  | c.1048G>T | Verified   | TTT | GAT | AAA | 1 | G | T |
| TCGA-29-1784 | ZNF343     | ENST00000278772     | p.S503I  | c.1508G>T | Unverified | TTT | AGC | CAG | 2 | G | T |
| TCGA-04-1651 | ZNF345     | ENST00000420450     | p.A378S  | c.1132G>T | Unverified | AAG | GCC | TTT | 1 | G | T |
| TCGA-04-1651 | ZNF345     | ENST00000420450     | p.A378S  | c.1132G>T | Unverified | AAG | GCC | TTT | 1 | G | T |
| TCGA-13-0923 | ZNF385D    | ENST00000281523     | p.S352I  | c.1055G>T | Verified   | GTG | AGT | TCC | 2 | G | T |
| TCGA-61-2094 | ZNF423_EN5 | ENST00000262383     | p.D207Y  | c.619G>T  | Unverified | AGC | GAC | CAC | 1 | G | T |
| TCGA-23-2078 | ZNF491     | ENST00000323169     | p.G239V  | c.716G>T  | Verified   | ACA | GGA | GAA | 2 | G | T |
| TCGA-09-2051 | ZNF549     | ENST00000240719     | p.G12V   | c.35G>T   | Unverified | CAG | GGC | CAT | 2 | G | T |
| TCGA-61-1740 | ZNF549     | ENST00000240719     | p.G410G  | c.1230G>T | Unverified | TGT | GGG | AAG | 3 | G | T |
| TCGA-61-1740 | ZNF549_EN5 | ENST00000376233     | p.G423G  | c.1269G>T | Unverified | TGT | GGG | AAG | 3 | G | T |
| TCGA-61-1998 | ZNF551     | ENST00000282296     | p.G633W  | c.1897G>T | Verified   | TGT | GGG | AAA | 1 | G | T |
| TCGA-24-2035 | ZNF560     | ENST00000301480     | p.G150C  | c.448G>T  | Verified   | GTA | GGT | TAC | 1 | G | T |
| TCGA-24-2290 | ZNF582     | ENST00000301310     | p.R387I  | c.1160G>T | Verified   | CAG | AGA | ATT | 2 | G | T |
| TCGA-24-2290 | ZNF582     | ENST00000301310     | p.R387I  | c.1160G>T | Verified   | CAG | AGA | ATT | 2 | G | T |
| TCGA-23-1022 | ZNF583     | ENST00000291598     | p.V47F   | c.139G>T  | Verified   | GGA | GTT | TCT | 1 | G | T |
| TCGA-61-2012 | ZNF589     | ENST00000354698     | p.G340V  | c.1019G>T | Verified   | CGA | GGC | TTT | 2 | G | T |
| TCGA-61-1998 | ZNF628_EN5 | ENST00000391718     | p.R86L   | c.257G>T  | Unverified | GAG | CGG | CCC | 2 | G | T |
| TCGA-29-1770 | ZNF662     | ENST00000440367     | p.G145V  | c.434G>T  | Unverified | GGG | GGA | CGT | 2 | G | T |
| TCGA-29-1770 | ZNF662_EN5 | ENST00000328199_v68 | p.G171V  | c.512G>T  | Unverified | GGG | GGA | CGT | 2 | G | T |
| TCGA-25-2392 | ZNF671     | ENST00000317398     | p.A159S  | c.475G>T  | Verified   | ATG | GCA | GAG | 1 | G | T |
| TCGA-24-1844 | ZNF679     | ENST00000421025     | p.D20Y   | c.58G>T   | Unverified | AGA | GAT | GTA | 1 | G | T |
| TCGA-20-1683 | ZNF699     | ENST00000308650     | p.G229V  | c.686G>T  | Unverified | TGT | GGG | AAG | 2 | G | T |
| TCGA-25-1326 | ZNF710     | ENST00000268154     | p.K583N  | c.1749G>T | Unverified | AGC | AAG | TTT | 3 | G | T |
| TCGA-04-1649 | ZNF727     | ENST00000550760     | p.A326S  | c.976G>T  | Unverified | TCG | GCC | CTT | 1 | G | T |
| TCGA-09-0369 | ZNF729     | ENST00000357491     | p.G1100W | c.3298G>T | Verified   | ACT | GGG | GAG | 1 | G | T |
| TCGA-09-0369 | ZNF729     | ENST00000357491     | p.G1100W | c.3298G>T | Verified   | ACT | GGG | GAG | 1 | G | T |

|              |            |                 |          |            |            |     |     |     |   |   |   |
|--------------|------------|-----------------|----------|------------|------------|-----|-----|-----|---|---|---|
| TCGA-23-1122 | ZNF765_ENS | ENST00000396408 | p.R477R  | c.1431G>T  | Verified   | AGC | CGG | ACG | 3 | G | T |
| TCGA-23-1029 | ZNF772     | ENST00000343280 | p.C439F  | c.1316G>T  | Unverified | GAA | TGT | GGA | 2 | G | T |
| TCGA-23-1110 | ZNF777     | ENST00000247930 | p.C602F  | c.1805G>T  | Unverified | GGC | TGC | GTC | 2 | G | T |
| TCGA-24-1463 | ZNF862     | ENST00000223210 | p.G246G  | c.738G>T   | Unverified | CCA | GGG | CCT | 3 | G | T |
| TCGA-24-0979 | ZNF99      | ENST00000397104 | p.A398S  | c.1192G>T  | Verified   | AAA | GCT | TTT | 1 | G | T |
| TCGA-29-1761 | ZP2        | ENST00000219593 | p.Q412H  | c.1236G>T  | Unverified | TCT | CAG | GGG | 3 | G | T |
| TCGA-24-1845 | ZSCAN20    | ENST00000326544 | p.E228*  | c.682G>T   | Unverified | CAG | GAA | GCC | 1 | G | T |
| TCGA-24-1847 | ZSCAN22    | ENST00000329665 | p.W233L  | c.698G>T   | Unverified | GCG | TGG | CCA | 2 | G | T |
| TCGA-29-1775 | A4GNT      | ENST00000236709 | p.V53E   | c.158T>A   | Unverified | ATT | GTG | TTT | 2 | T | A |
| TCGA-61-1725 | ABCA12     | ENST00000272895 | p.P961P  | c.2883T>A  | Unverified | CTT | CCT | TCT | 3 | T | A |
| TCGA-13-0762 | ABCD2      | ENST00000308666 | p.V593D  | c.1778T>A  | Verified   | ATA | GTT | CAA | 2 | T | A |
| TCGA-13-0762 | ABCD2      | ENST00000308666 | p.V593D  | c.1778T>A  | Verified   | ATA | GTT | CAA | 2 | T | A |
| TCGA-29-1781 | ABHD8      | ENST00000247706 | p.A231A  | c.693T>A   | Unverified | CTG | GCT | GAG | 3 | T | A |
| TCGA-61-1740 | ABP1       | ENST00000360937 | p.S560T  | c.1678T>A  | Unverified | TAC | TCC | TGG | 1 | T | A |
| TCGA-23-1124 | AC093393.1 | ENST00000322472 | p.Y236N  | c.706T>A   | Verified   | GTG | TAC | TCT | 1 | T | A |
| TCGA-29-1784 | ACADM      | ENST00000370841 | p.D68E   | c.204T>A   | Unverified | TAT | GAT | AAA | 3 | T | A |
| TCGA-24-1417 | ACCN5      | ENST00000537611 | p.H140Q  | c.420T>A   | Verified   | CTC | CAT | CTT | 3 | T | A |
| TCGA-13-0913 | ACRC       | ENST00000373695 | p.S532T  | c.1594T>A  | Verified   | AGA | TCC | GTC | 1 | T | A |
| TCGA-24-1417 | ACTG1      | ENST00000331925 | p.S233T  | c.697T>A   | Verified   | TCC | TCC | TCT | 1 | T | A |
| TCGA-04-1338 | ACTR8      | ENST00000335754 | p.P197P  | c.591T>A   | Verified   | GGC | CCT | GGG | 3 | T | A |
| TCGA-24-1849 | ADAM18     | ENST00000265707 | p.S352R  | c.1056T>A  | Unverified | GCC | AGT | GGT | 3 | T | A |
| TCGA-61-1910 | ADCK2      | ENST00000072869 | p.L101H  | c.302T>A   | Unverified | tgg | ctt | cgc | 2 | T | A |
| TCGA-04-1361 | ADORA3     | ENST00000241356 | p.F80Y   | c.239T>A   | Verified   | CAC | TTC | TAC | 2 | T | A |
| TCGA-04-1361 | ADORA3     | ENST00000241356 | p.F80Y   | c.239T>A   | Verified   | CAC | TTC | TAC | 2 | T | A |
| TCGA-24-1469 | ADSSL1     | ENST00000332972 | p.F432I  | c.1294T>A  | Verified   | TAT | TTC | CCA | 1 | T | A |
| TCGA-25-2398 | AGAP8      | ENST00000425119 | p.I650N  | c.1949T>A  | Unverified | TGC | ATC | AAC | 2 | T | A |
| TCGA-24-1422 | AGPAT3     | ENST00000398058 | p.V120D  | c.359T>A   | Unverified | AAG | GTC | CTC | 2 | T | A |
| TCGA-13-0905 | AGTPBP1    | ENST00000376083 | p.L520L  | c.1560T>A  | Verified   | AGT | CTT | CCT | 3 | T | A |
| TCGA-13-0887 | AHCTF1     | ENST00000391829 | p.L1411H | c.4232T>A  | Verified   | TCT | CTT | TGT | 2 | T | A |
| TCGA-13-1481 | AHCTF1     | ENST00000391829 | p.S1647R | c.4941T>A  | Verified   | ACT | AGT | GAC | 3 | T | A |
| TCGA-13-0890 | AKAP1      | ENST00000337714 | p.V815D  | c.2444T>A  | Verified   | ttt | gtc | acc | 2 | T | A |
| TCGA-29-1761 | ANK1       | ENST00000347528 | p.F16Y   | c.47T>A    | Unverified | agc | ttt | ctg | 2 | T | A |
| TCGA-29-1761 | ANK1_ENSTI | ENST00000265709 | p.F49Y   | c.146T>A   | Unverified | AGC | TTT | CTG | 2 | T | A |
| TCGA-25-2392 | ANK3       | ENST00000280772 | p.C3752S | c.11254T>A | Verified   | AGT | TGT | CAG | 1 | T | A |

|              |             |                 |          |            |            |     |     |     |   |   |   |
|--------------|-------------|-----------------|----------|------------|------------|-----|-----|-----|---|---|---|
| TCGA-29-1711 | ANK3        | ENST00000280772 | p.P2191P | c.6573T>A  | Unverified | GAG | CCT | GTG | 3 | T | A |
| TCGA-29-1711 | ANK3        | ENST00000280772 | p.P2191P | c.6573T>A  | Unverified | GAG | CCT | GTG | 3 | T | A |
| TCGA-13-0904 | ANKRD30A    | ENST00000361713 | p.C285S  | c.853T>A   | Verified   | CAA | TGT | TTG | 1 | T | A |
| TCGA-23-1032 | ANKRD30A    | ENST00000361713 | p.I327N  | c.980T>A   | Verified   | AAG | ATC | GCA | 2 | T | A |
| TCGA-13-0923 | ANO5        | ENST00000324559 | p.L695L  | c.2085T>A  | Verified   | CCT | CTT | CTT | 3 | T | A |
| TCGA-04-1342 | ANO8        | ENST00000159087 | p.V447D  | c.1340T>A  | Unverified | TTT | GTC | AAC | 2 | T | A |
| TCGA-20-1686 | ANXA5       | ENST00000296511 | p.S305T  | c.913T>A   | Unverified | ACA | TCT | GGG | 1 | T | A |
| TCGA-24-2024 | APBB3       | ENST00000354402 | p.S248R  | c.744T>A   | Verified   | GCC | AGT | GCC | 3 | T | A |
| TCGA-24-2289 | APOB        | ENST00000233242 | p.F2957I | c.8869T>A  | Unverified | TCC | TTT | GGA | 1 | T | A |
| TCGA-24-1435 | APOB        | ENST00000233242 | p.L1527H | c.4580T>A  | Verified   | TAC | CTC | CAA | 2 | T | A |
| TCGA-24-0979 | APOB        | ENST00000233242 | p.D4049E | c.12147T>A | Verified   | TCT | GAT | GAG | 3 | T | A |
| TCGA-29-1770 | AQP10       | ENST00000324978 | p.A275A  | c.825T>A   | Unverified | CCA | GCT | CAG | 3 | T | A |
| TCGA-13-0760 | AR          | ENST00000374690 | p.L729I  | c.2185T>A  | Verified   | aac | tta | cac | 1 | T | A |
| TCGA-13-0885 | ARHGAP20    | ENST00000260283 | p.F551L  | c.1653T>A  | Verified   | ata | ttt | gga | 3 | T | A |
| TCGA-13-1512 | ARHGEF1     | ENST00000337665 | p.S3T    | c.7T>A     | Verified   | gct | tct | ctt | 1 | T | A |
| TCGA-13-1501 | ARHGEF11    | ENST00000368194 | p.G1162G | c.3486T>A  | Verified   | cat | ggt | gaa | 3 | T | A |
| TCGA-13-1501 | ARHGEF11    | ENST00000368194 | p.G1162G | c.3486T>A  | Verified   | cat | ggt | gaa | 3 | T | A |
| TCGA-24-1417 | ARMC2       | ENST00000392644 | p.D198E  | c.594T>A   | Unverified | GAT | GAT | GGA | 3 | T | A |
| TCGA-04-1356 | ARMCX3      | ENST00000341189 | p.L266H  | c.797T>A   | Unverified | aaa | ctc | ctt | 2 | T | A |
| TCGA-29-1696 | ARR3        | ENST00000307959 | p.H355Q  | c.1065T>A  | Unverified | TCT | CAT | GAG | 3 | T | A |
| TCGA-29-1696 | ARR3        | ENST00000307959 | p.H355Q  | c.1065T>A  | Unverified | TCT | CAT | GAG | 3 | T | A |
| TCGA-09-1665 | ATAD2       | ENST00000287394 | p.S1275T | c.3823T>A  | Verified   | GCT | TCT | AGC | 1 | T | A |
| TCGA-13-1507 | ATF1        | ENST00000262053 | p.L71I   | c.211T>A   | Verified   | GAC | TTA | TCT | 1 | T | A |
| TCGA-24-2290 | ATG9B       | ENST00000397266 | p.L317Q  | c.950T>A   | Verified   | GCC | CTG | CAC | 2 | T | A |
| TCGA-24-2290 | ATG9B       | ENST00000397266 | p.L317Q  | c.950T>A   | Verified   | GCC | CTG | CAC | 2 | T | A |
| TCGA-23-1032 | ATRN        | ENST00000262919 | p.I1161I | c.3483T>A  | Verified   | CTT | ATT | GAC | 3 | T | A |
| TCGA-13-1512 | BAG4        | ENST00000287322 | p.L411L  | c.1233T>A  | Verified   | tgg | ctt | ctg | 3 | T | A |
| TCGA-13-0755 | BAZ2B       | ENST00000392783 | p.S1229R | c.3687T>A  | Verified   | GTC | AGT | GAA | 3 | T | A |
| TCGA-23-1123 | BCLAF1      | ENST00000531224 | p.D451E  | c.1353T>A  | Verified   | AGT | GAT | GGA | 3 | T | A |
| TCGA-23-1123 | BCLAF1      | ENST00000531224 | p.D451E  | c.1353T>A  | Verified   | AGT | GAT | GGA | 3 | T | A |
| TCGA-29-1763 | BICC1       | ENST00000373886 | p.V239E  | c.716T>A   | Unverified | TCA | GTA | TCA | 2 | T | A |
| TCGA-24-2289 | BTRC        | ENST00000370187 | p.F514Y  | c.1541T>A  | Unverified | cga | ttt | gat | 2 | T | A |
| TCGA-61-1914 | C10orf71_E1 | ENST00000374144 | p.S732T  | c.2194T>A  | Unverified | AGC | TCT | TCA | 1 | T | A |
| TCGA-61-1740 | C14orf135   | ENST00000404681 | p.P758P  | c.2274T>A  | Unverified | AGT | CCT | GGT | 3 | T | A |

|              |             |                 |         |           |            |     |     |     |   |   |   |
|--------------|-------------|-----------------|---------|-----------|------------|-----|-----|-----|---|---|---|
| TCGA-61-1740 | C14orf135_f | ENST00000406854 | p.P992P | c.2976T>A | Unverified | AGT | CCT | GGT | 3 | T | A |
| TCGA-04-1542 | C18orf1     | ENST00000361205 | p.C15S  | c.43T>A   | Verified   | gag | tgc | aaa | 1 | T | A |
| TCGA-24-1845 | C20orf103   | ENST00000246070 | p.V248D | c.743T>A  | Unverified | CTC | GTC | ATC | 2 | T | A |
| TCGA-04-1530 | C20orf185   | ENST00000375494 | p.V358D | c.1073T>A | Unverified | TTG | GTC | TCC | 2 | T | A |
| TCGA-29-1775 | C2orf47     | ENST00000392290 | p.F11I  | c.31T>A   | Unverified | CAG | TTC | CTG | 1 | T | A |
| TCGA-29-1770 | C6orf138    | ENST00000339488 | p.F226I | c.676T>A  | Unverified | GAC | TTT | CAT | 1 | T | A |
| TCGA-13-0905 | C6orf47     | ENST00000375911 | p.L155* | c.464T>A  | Verified   | CTG | TTG | GGC | 2 | T | A |
| TCGA-29-1768 | C9orf11     | ENST00000380032 | p.A93A  | c.279T>A  | Unverified | TTT | GCT | CTA | 3 | T | A |
| TCGA-61-1900 | CACNA2D3    | ENST00000474759 | p.A455A | c.1365T>A | Unverified | GAA | GCT | TAC | 3 | T | A |
| TCGA-24-1850 | CACNG4      | ENST00000262138 | p.F306I | c.916T>A  | Unverified | GAC | TTT | TTC | 1 | T | A |
| TCGA-24-1435 | CADM1       | ENST00000452722 | p.I247N | c.740T>A  | Verified   | CAC | ATT | CAG | 2 | T | A |
| TCGA-13-1510 | CADPS       | ENST00000283269 | p.V721D | c.2162T>A | Unverified | GGA | GTC | CGG | 2 | T | A |
| TCGA-13-0919 | CaMK1b      | SU_CaMK1b       | p.I310N | c.929T>A  | Verified   | cac | atc | cgg | 2 | T | A |
| TCGA-13-0885 | CAMTA2      | ENST00000348066 | p.P69P  | c.207T>A  | Verified   | AGG | CCT | CAG | 3 | T | A |
| TCGA-13-1497 | CAPN6       | ENST00000324068 | p.T205T | c.615T>A  | Verified   | tac | act | gag | 3 | T | A |
| TCGA-13-0714 | CASP14      | ENST00000427043 | p.F195Y | c.584T>A  | Verified   | gtg | ttc | acg | 2 | T | A |
| TCGA-20-1687 | CATSPERB    | ENST00000256343 | p.D27E  | c.81T>A   | Unverified | AAA | GAT | GAT | 3 | T | A |
| TCGA-13-0924 | CCDC148     | ENST00000283233 | p.L301M | c.901T>A  | Verified   | GAT | TTG | GTT | 1 | T | A |
| TCGA-30-1855 | CCDC149     | ENST00000324309 | p.S224T | c.670T>A  | Unverified | CTA | TCT | GAG | 1 | T | A |
| TCGA-30-1855 | CCDC149_f   | ENST00000504487 | p.S279T | c.835T>A  | Unverified | CTA | TCT | GAG | 1 | T | A |
| TCGA-30-1856 | CCDC158     | ENST00000388914 | p.L837I | c.2509T>A | Unverified | CGC | TTA | AAA | 1 | T | A |
| TCGA-09-0369 | CCNB1IP1    | ENST00000358932 | p.N168K | c.504T>A  | Verified   | CGC | AAT | CGT | 3 | T | A |
| TCGA-09-0369 | CCNB1IP1    | ENST00000358932 | p.N168K | c.504T>A  | Verified   | CGC | AAT | CGT | 3 | T | A |
| TCGA-13-0885 | CCNB3       | ENST00000376042 | p.V680V | c.2040T>A | Verified   | CAT | GTT | AAG | 3 | T | A |
| TCGA-13-0885 | CCNB3_ENS   | ENST00000376042 | p.V680V | c.2040T>A | Verified   | CAT | GTT | AAG | 3 | T | A |
| TCGA-29-1693 | CCT8L2      | ENST00000359963 | p.V205E | c.614T>A  | Unverified | GGG | GTG | TGC | 2 | T | A |
| TCGA-29-1763 | CD1D        | ENST00000368171 | p.F36Y  | c.107T>A  | Unverified | TCC | TTC | GCC | 2 | T | A |
| TCGA-13-1510 | CD80        | ENST00000264246 | p.V225E | c.674T>A  | Verified   | AGA | GTG | AAT | 2 | T | A |
| TCGA-13-0792 | CDH17       | ENST00000027335 | p.L13L  | c.39T>A   | Unverified | CTT | CTT | ATG | 3 | T | A |
| TCGA-13-0920 | CDKAL1      | ENST00000378610 | p.C221S | c.661T>A  | Verified   | TAC | TGC | AAA | 1 | T | A |
| TCGA-13-1505 | CEACAM5     | ENST00000221992 | p.L549Q | c.1646T>A | Unverified | CAG | CTG | TCC | 2 | T | A |
| TCGA-23-1118 | CEBPE       | ENST00000206513 | p.F20I  | c.58T>A   | Verified   | GAG | TTC | TCA | 1 | T | A |
| TCGA-61-1738 | CEP164      | ENST00000278935 | p.H543Q | c.1629T>A | Unverified | CAG | CAT | TCC | 3 | T | A |
| TCGA-61-1738 | CEP164      | ENST00000278935 | p.H543Q | c.1629T>A | Unverified | CAG | CAT | TCC | 3 | T | A |

|              |            |                 |          |           |            |     |     |     |   |   |   |
|--------------|------------|-----------------|----------|-----------|------------|-----|-----|-----|---|---|---|
| TCGA-23-1110 | CHM        | ENST00000357749 | p.F52I   | c.154T>A  | Verified   | agc | ttt | tca | 1 | T | A |
| TCGA-13-0893 | CHN1       | ENST00000409900 | p.Y70N   | c.208T>A  | Verified   | agc | tac | ctc | 1 | T | A |
| TCGA-24-1846 | CINP       | ENST00000216756 | p.S73T   | c.217T>A  | Unverified | GCC | TCG | AAG | 1 | T | A |
| TCGA-13-0900 | CLCA4      | ENST00000370563 | p.S421T  | c.1261T>A | Verified   | AGT | TCT | TGT | 1 | T | A |
| TCGA-13-1408 | CLCN4      | ENST00000380833 | p.I33N   | c.98T>A   | Verified   | acc | atc | gac | 2 | T | A |
| TCGA-23-1021 | CLCN5      | ENST00000376108 | p.V262E  | c.785T>A  | Verified   | gga | gta | tta | 2 | T | A |
| TCGA-13-0793 | CLP1       | ENST00000533682 | p.V65V   | c.195T>A  | Verified   | GCT | GTT | TTC | 3 | T | A |
| TCGA-24-1843 | CNTNAP5    | ENST00000431078 | p.I623N  | c.1868T>A | Unverified | AAT | ATC | ACT | 2 | T | A |
| TCGA-30-1718 | COG5       | ENST00000297135 | p.P713P  | c.2139T>A | Unverified | AGA | CCT | CTT | 3 | T | A |
| TCGA-13-0760 | COL11A1    | ENST00000358392 | p.S1674T | c.5020T>A | Verified   | TCA | TCA | TGG | 1 | T | A |
| TCGA-24-1844 | COL4A1     | ENST00000375820 | p.C1616* | c.4848T>A | Unverified | GAG | TGT | CAC | 3 | T | A |
| TCGA-24-1844 | COL4A1_EN1 | ENST00000375815 | p.C1259* | c.3777T>A | Unverified | GAG | TGT | CAC | 3 | T | A |
| TCGA-09-2049 | COL6A6     | ENST00000358511 | p.T1235T | c.3705T>A | Verified   | GAG | ACT | CAG | 3 | T | A |
| TCGA-23-1022 | COL9A1     | ENST00000357250 | p.F10I   | c.28T>A   | Verified   | GTT | TTC | TTC | 1 | T | A |
| TCGA-30-1855 | CPA6       | ENST00000297770 | p.W200R  | c.598T>A  | Unverified | GAA | TGG | ATT | 1 | T | A |
| TCGA-13-0791 | CPN2       | ENST00000323830 | p.W468R  | c.1402T>A | Verified   | AGC | TGG | GAT | 1 | T | A |
| TCGA-13-0887 | CRELD1     | ENST00000326434 | p.I342N  | c.1025T>A | Verified   | GGC | ATC | TGT | 2 | T | A |
| TCGA-24-2289 | CRELD2     | ENST00000328268 | p.A336A  | c.1008T>A | Unverified | GAG | GCT | GAA | 3 | T | A |
| TCGA-24-2280 | CRTAM      | ENST00000227348 | p.C177*  | c.531T>A  | Unverified | AAA | TGT | AAT | 3 | T | A |
| TCGA-13-0923 | CSMD2      | ENST00000241312 | p.F1314I | c.3940T>A | Verified   | CAC | TTC | CTG | 1 | T | A |
| TCGA-13-0760 | CSMD3      | ENST00000297405 | p.L2512H | c.7535T>A | Verified   | gtt | ctt | cag | 2 | T | A |
| TCGA-61-1899 | CSMD3      | ENST00000297405 | p.A3230A | c.9690T>A | Unverified | aga | gct | gtt | 3 | T | A |
| TCGA-61-1899 | CSMD3_ENS  | ENST00000343508 | p.A3190A | c.9570T>A | Unverified | AGA | GCT | GTT | 3 | T | A |
| TCGA-04-1331 | CSRNP1     | ENST00000273153 | p.P315P  | c.945T>A  | Verified   | GCC | CCT | GCC | 3 | T | A |
| TCGA-24-1847 | CTNND2     | ENST00000304623 | p.C127S  | c.379T>A  | Unverified | tcc | tgt | att | 1 | T | A |
| TCGA-24-1847 | CYP11A1    | ENST00000268053 | p.L490H  | c.1469T>A | Unverified | CAC | CTC | AGC | 2 | T | A |
| TCGA-61-1907 | CYP11B1    | ENST00000292427 | p.S388T  | c.1162T>A | Unverified | AGC | TCA | GAC | 1 | T | A |
| TCGA-13-0893 | CYP11B1    | ENST00000292427 | p.L53Q   | c.158T>A  | Unverified | CTG | CTG | CAG | 2 | T | A |
| TCGA-09-2044 | CYP2C19    | ENST00000371321 | p.L366Q  | c.1097T>A | Verified   | AGC | CTG | CCC | 2 | T | A |
| TCGA-13-0760 | CYP2C19    | ENST00000371321 | p.L445Q  | c.1334T>A | Verified   | GAG | CTG | TTT | 2 | T | A |
| TCGA-13-1496 | CYP39A1    | ENST00000275016 | p.D313E  | c.939T>A  | Verified   | AAA | GAT | AAG | 3 | T | A |
| TCGA-25-2400 | DACH2      | ENST00000373125 | p.A296A  | c.888T>A  | Verified   | ggt | gct | cca | 3 | T | A |
| TCGA-25-2400 | DACH2_ENS  | ENST00000373131 | p.A283A  | c.849T>A  | Verified   | GGT | GCT | CCA | 3 | T | A |
| TCGA-23-1122 | DCAF4      | ENST00000358377 | p.S291T  | c.871T>A  | Verified   | TGG | TCC | CTG | 1 | T | A |

|              |            |                 |          |           |            |     |     |     |   |   |   |
|--------------|------------|-----------------|----------|-----------|------------|-----|-----|-----|---|---|---|
| TCGA-24-2267 | DCHS1      | ENST00000299441 | p.Y538N  | c.1612T>A | Verified   | GAC | TAT | GAG | 1 | T | A |
| TCGA-24-1616 | DHRS4L2    | ENST00000335125 | p.H89Q   | c.267T>A  | Verified   | TGC | CAT | GTG | 3 | T | A |
| TCGA-29-1763 | DIRAS3     | ENST00000370981 | p.L20Q   | c.59T>A   | Unverified | ctt | ctg | ccc | 2 | T | A |
| TCGA-61-2012 | DLX2       | ENST00000234198 | p.M87K   | c.260T>A  | Unverified | CAC | ATG | GGT | 2 | T | A |
| TCGA-25-1313 | DMRT3      | ENST00000190165 | p.V254E  | c.761T>A  | Verified   | GAA | GTG | TTA | 2 | T | A |
| TCGA-13-0760 | DNAH10     | ENST00000339192 | p.P784P  | c.2352T>A | Verified   | AAC | CCT | CAG | 3 | T | A |
| TCGA-30-1891 | DNAH3      | ENST00000261383 | p.L1949H | c.5846T>A | Unverified | TTT | CTC | TGG | 2 | T | A |
| TCGA-30-1891 | DNAH3_ENS  | ENST00000261383 | p.L1949H | c.5846T>A | Unverified | TTT | CTC | TGG | 2 | T | A |
| TCGA-20-1687 | DNAH7      | ENST00000312428 | p.S996S  | c.2988T>A | Unverified | AGC | TCT | CCA | 3 | T | A |
| TCGA-29-1703 | DOCK8      | ENST00000432829 | p.L1978H | c.5933T>A | Unverified | GAA | CTC | AAA | 2 | T | A |
| TCGA-29-1703 | DOCK8_ENS  | ENST00000453981 | p.L2046H | c.6137T>A | Unverified | GAA | CTC | AAA | 2 | T | A |
| TCGA-61-2008 | DOPEY1     | ENST00000349129 | p.H2141Q | c.6423T>A | Verified   | ACA | CAT | GAT | 3 | T | A |
| TCGA-24-1103 | DPP10      | ENST00000310323 | p.V172D  | c.515T>A  | Verified   | TCC | GTC | TTG | 2 | T | A |
| TCGA-04-1331 | DSEL       | ENST00000310045 | p.F1143Y | c.3428T>A | Verified   | CAT | TTT | CCT | 2 | T | A |
| TCGA-13-0920 | DSG1       | ENST00000257192 | p.I290N  | c.869T>A  | Verified   | GAG | ATT | AGA | 2 | T | A |
| TCGA-13-0893 | DST        | ENST00000370765 | p.I549I  | c.1647T>A | Verified   | ATA | ATT | CAA | 3 | T | A |
| TCGA-13-0893 | DST_ENST00 | ENST00000370769 | p.I875I  | c.2625T>A | Verified   | ATA | ATT | CAA | 3 | T | A |
| TCGA-13-0923 | DUOX1      | ENST00000389037 | p.Y1206* | c.3618T>A | Verified   | ATG | TAT | GTC | 3 | T | A |
| TCGA-30-1857 | DYNC2LI1   | ENST00000260605 | p.I184N  | c.551T>A  | Unverified | ATA | ATT | GGA | 2 | T | A |
| TCGA-23-1021 | DZIP1      | ENST00000361396 | p.L315*  | c.944T>A  | Verified   | GAA | TTA | ACT | 2 | T | A |
| TCGA-29-1764 | E2F2       | ENST00000361729 | p.L374Q  | c.1121T>A | Unverified | agc | ctg | ctg | 2 | T | A |
| TCGA-09-0369 | E2F5       | ENST00000416274 | p.L314H  | c.941T>A  | Verified   | CCT | CTC | TTA | 2 | T | A |
| TCGA-09-0369 | E2F5       | ENST00000416274 | p.L314H  | c.941T>A  | Verified   | CCT | CTC | TTA | 2 | T | A |
| TCGA-23-2078 | E2F7       | ENST00000322886 | p.A592A  | c.1776T>A | Unverified | TCA | GCT | CAG | 3 | T | A |
| TCGA-13-1488 | EFHC1      | ENST00000371068 | p.D230E  | c.690T>A  | Verified   | TTT | GAT | CAA | 3 | T | A |
| TCGA-13-0923 | EFTUD2     | ENST00000426333 | p.M603K  | c.1808T>A | Verified   | AAG | ATG | CTT | 2 | T | A |
| TCGA-29-1770 | EGFLAM     | ENST00000322350 | p.D436E  | c.1308T>A | Unverified | GGG | GAT | TTC | 3 | T | A |
| TCGA-29-1770 | EGFLAM_EN  | ENST00000354891 | p.D436E  | c.1308T>A | Unverified | GGG | GAT | TTC | 3 | T | A |
| TCGA-23-2077 | EIF3E      | ENST00000220849 | p.L205H  | c.614T>A  | Verified   | cca | ctt | cag | 2 | T | A |
| TCGA-13-0883 | ELMOD3     | ENST00000315658 | p.I178N  | c.533T>A  | Verified   | ACC | ATC | TAT | 2 | T | A |
| TCGA-23-1117 | EML4       | ENST00000318522 | p.V412V  | c.1236T>A | Verified   | GTT | GTT | TTG | 3 | T | A |
| TCGA-23-1117 | EML4       | ENST00000318522 | p.V412V  | c.1236T>A | Verified   | GTT | GTT | TTG | 3 | T | A |
| TCGA-24-1474 | ENSG00000: | ENST00000315797 | p.M217K  | c.650T>A  | Unverified | ACC | ATG | TGC | 2 | T | A |
| TCGA-04-1652 | ENSG00000: | ENST00000340731 | p.L268H  | c.803T>A  | Unverified | CAC | CTC | TGG | 2 | T | A |



|              |                           |          |           |            |     |     |     |   |   |   |
|--------------|---------------------------|----------|-----------|------------|-----|-----|-----|---|---|---|
| TCGA-04-1652 | ENSG00000:ENST00000340731 | p.L268H  | c.803T>A  | Unverified | CAC | CTC | TGG | 2 | T | A |
| TCGA-13-0903 | ENSG00000:ENST00000260257 | p.F377L  | c.1131T>A | Verified   | GTC | TTT | CAG | 3 | T | A |
| TCGA-61-1895 | EPB41 ENST00000349460     | p.N497K  | c.1491T>A | Unverified | ATC | AAT | GGG | 3 | T | A |
| TCGA-61-1895 | EPB41_ENST00000343067     | p.N720K  | c.2160T>A | Unverified | ATC | AAT | GGG | 3 | T | A |
| TCGA-23-1110 | EPB42 ENST00000300215     | p.M364K  | c.1091T>A | Verified   | TGG | ATG | ACG | 2 | T | A |
| TCGA-04-1367 | EPHA3 ENST00000336596     | p.I564N  | c.1691T>A | Verified   | ttg | att | ggg | 2 | T | A |
| TCGA-25-2400 | EPHA7 NM_004440           | p.A517A  | c.1551T>A | Verified   | cgg | gct | ttt | 3 | T | A |
| TCGA-29-1699 | EPHX1 ENST00000366837     | p.V180D  | c.539T>A  | Unverified | GAA | GTC | ATC | 2 | T | A |
| TCGA-23-1114 | EPS8 ENST00000281172      | p.M367K  | c.1100T>A | Unverified | AAT | ATG | GTG | 2 | T | A |
| TCGA-13-1497 | ERBB3_ENST00000267101     | p.D1194E | c.3582T>A | Verified   | GAA | GAT | GAG | 3 | T | A |
| TCGA-20-1685 | ESF1 ENST00000202816      | p.S190T  | c.568T>A  | Unverified | GAC | TCA | GGC | 1 | T | A |
| TCGA-61-1910 | ESYT1 ENST00000394048     | p.L763M  | c.2287T>A | Unverified | CAC | TTG | CGC | 1 | T | A |
| TCGA-61-2109 | EXOC5 ENST00000413566     | p.I364N  | c.1091T>A | Unverified | ATG | ATC | CTA | 2 | T | A |
| TCGA-61-1907 | EXPH5 ENST00000265843     | p.L144Q  | c.431T>A  | Unverified | TCA | CTG | GGA | 2 | T | A |
| TCGA-25-1313 | F8 ENST00000360256        | p.W87R   | c.259T>A  | Verified   | CCC | TGG | ATG | 1 | T | A |
| TCGA-25-1313 | F8_ENST00000360256        | p.W87R   | c.259T>A  | Verified   | CCC | TGG | ATG | 1 | T | A |
| TCGA-13-1496 | FABP2 ENST00000274024     | p.N104K  | c.312T>A  | Verified   | CTG | AAT | ACT | 3 | T | A |
| TCGA-61-1910 | FAM131B ENST00000409346   | p.L198Q  | c.593T>A  | Unverified | TGT | CTG | GGG | 2 | T | A |
| TCGA-61-1910 | FAM131B_E ENST00000443739 | p.L226Q  | c.677T>A  | Unverified | TGT | CTG | GGG | 2 | T | A |
| TCGA-24-1847 | FAM186B ENST00000257894   | p.V230D  | c.689T>A  | Unverified | GAG | GTC | AGG | 2 | T | A |
| TCGA-13-0793 | FAM190A ENST00000509176   | p.D515E  | c.1545T>A | Verified   | CTG | GAT | GAA | 3 | T | A |
| TCGA-20-1687 | FAM22F ENST00000341207    | p.P485P  | c.1455T>A | Unverified | TCT | CCT | GTC | 3 | T | A |
| TCGA-20-1687 | FAM22F_ENST00000253262    | p.P619P  | c.1857T>A | Unverified | TCT | CCT | GTC | 3 | T | A |
| TCGA-09-1665 | FAM71B ENST00000302938    | p.A257A  | c.771T>A  | Verified   | GGG | GCT | GCT | 3 | T | A |
| TCGA-13-0760 | FAM98A ENST00000238823    | p.L77H   | c.230T>A  | Verified   | CAG | CTT | GAG | 2 | T | A |
| TCGA-20-0990 | FANCG ENST00000378643     | p.V471E  | c.1412T>A | Verified   | aaa | gtg | gca | 2 | T | A |
| TCGA-30-1857 | FASTKD3 ENST00000264669   | p.G480G  | c.1440T>A | Unverified | CAA | GGT | AAA | 3 | T | A |
| TCGA-09-2044 | FAT4 ENST00000330166      | p.G1453G | c.4359T>A | Verified   | AAT | GGT | CAA | 3 | T | A |
| TCGA-09-2044 | FAT4_ENST00000394329      | p.G1453G | c.4359T>A | Verified   | AAT | GGT | CAA | 3 | T | A |
| TCGA-61-2102 | FBN2 ENST00000262464      | p.M692K  | c.2075T>A | Verified   | GGC | ATG | GAT | 2 | T | A |
| TCGA-23-1117 | FBXO34 ENST00000313833    | p.Y654N  | c.1960T>A | Verified   | ccc | tat | tgc | 1 | T | A |
| TCGA-23-1117 | FBXO34 ENST00000313833    | p.Y654N  | c.1960T>A | Verified   | ccc | tat | tgc | 1 | T | A |
| TCGA-13-1501 | FBXO38 ENST00000340253    | p.S444T  | c.1330T>A | Verified   | gac | tct | ttt | 1 | T | A |
| TCGA-13-1501 | FBXO38 ENST00000340253    | p.S444T  | c.1330T>A | Verified   | gac | tct | ttt | 1 | T | A |

|              |            |                 |          |           |            |     |     |     |   |   |   |
|--------------|------------|-----------------|----------|-----------|------------|-----|-----|-----|---|---|---|
| TCGA-13-1408 | FBXO6      | ENST00000376753 | p.L183H  | c.548T>A  | Unverified | caa | ctc | aaa | 2 | T | A |
| TCGA-13-1509 | FCRL3      | ENST00000368184 | p.M207K  | c.620T>A  | Verified   | CCC | ATG | ACC | 2 | T | A |
| TCGA-23-1110 | FGA        | ENST00000302053 | p.L699Q  | c.2096T>A | Verified   | AGC | CTG | AAT | 2 | T | A |
| TCGA-24-2280 | FGA        | ENST00000302053 | p.V541D  | c.1622T>A | Unverified | TTT | GTC | AGT | 2 | T | A |
| TCGA-04-1338 | FGF12      | ENST00000454309 | p.G91G   | c.273T>A  | Verified   | GAT | GGT | ACC | 3 | T | A |
| TCGA-29-1696 | FGF14      | ENST00000376131 | p.G75G   | c.225T>A  | Unverified | AAG | GGT | ATA | 3 | T | A |
| TCGA-29-1696 | FGF14      | ENST00000376131 | p.G75G   | c.225T>A  | Unverified | AAG | GGT | ATA | 3 | T | A |
| TCGA-29-1696 | FGF14_ENST | ENST00000376143 | p.G70G   | c.210T>A  | Unverified | AAG | GGT | ATA | 3 | T | A |
| TCGA-29-1696 | FGF14_ENST | ENST00000376143 | p.G70G   | c.210T>A  | Unverified | AAG | GGT | ATA | 3 | T | A |
| TCGA-13-0760 | FIP1L1     | ENST00000337488 | p.W165R  | c.493T>A  | Verified   | CCA | TGG | CGT | 1 | T | A |
| TCGA-13-0920 | FLJ45831   | ENST00000379640 | p.C98*   | c.294T>A  | Verified   | GGC | TGT | GAA | 3 | T | A |
| TCGA-13-0884 | FLT1       | ENST00000282397 | p.N212K  | c.636T>A  | Verified   | GTC | AAT | GGG | 3 | T | A |
| TCGA-23-1124 | FOLR4      | ENST00000328458 | p.N122K  | c.366T>A  | Verified   | GTG | AAT | GTG | 3 | T | A |
| TCGA-09-1665 | FOXN4      | NM_213596.1     | p.F263Y  | c.788T>A  | Verified   | gga | ttc | agc | 2 | T | A |
| TCGA-13-0893 | FOXS1      | ENST00000375978 | p.P186P  | c.558T>A  | Verified   | AGG | CCT | CGG | 3 | T | A |
| TCGA-29-1781 | FPR3       | ENST00000339223 | p.Y175N  | c.523T>A  | Unverified | ACA | TAC | TGT | 1 | T | A |
| TCGA-20-1687 | FRAS1      | ENST00000264895 | p.I2666I | c.7998T>A | Unverified | GTC | ATT | ATC | 3 | T | A |
| TCGA-20-1687 | FRAS1_ENST | ENST00000264895 | p.I2666I | c.7998T>A | Unverified | GTC | ATT | ATC | 3 | T | A |
| TCGA-25-1326 | FRK        | ENST00000368626 | p.S145R  | c.435T>A  | Verified   | gaa | agt | gaa | 3 | T | A |
| TCGA-04-1649 | FRMPD3     | XM_042978.4     | p.P442P  | c.1326T>A | Unverified | ctt | cct | acc | 3 | T | A |
| TCGA-04-1649 | FRMPD3_EN  | ENST00000276185 | p.P393P  | c.1179T>A | Unverified | CTT | CCT | ACC | 3 | T | A |
| TCGA-61-1998 | FSHR       | ENST00000406846 | p.V556E  | c.1667T>A | Verified   | ACA | GTG | CGG | 2 | T | A |
| TCGA-29-1764 | FSHR       | ENST00000406846 | p.S26S   | c.78T>A   | Unverified | TGC | TCT | AAC | 3 | T | A |
| TCGA-25-1313 | GAB4       | ENST00000400588 | p.S468T  | c.1402T>A | Verified   | TCC | TCC | CAA | 1 | T | A |
| TCGA-13-1481 | GABRE_ENS  | ENST00000370328 | p.P108P  | c.324T>A  | Verified   | GGT | CCT | CTC | 3 | T | A |
| TCGA-24-2262 | GAS2L1_EN  | ENST00000333679 | p.L516Q  | c.1547T>A | Unverified | CAG | CTG | TTC | 2 | T | A |
| TCGA-13-1505 | GAS2L2     | NM_139285.1     | p.V235E  | c.704T>A  | Verified   | cgt | gtg | ggt | 2 | T | A |
| TCGA-24-1845 | GCM2       | ENST00000379491 | p.P233P  | c.699T>A  | Unverified | TGC | CCT | TCC | 3 | T | A |
| TCGA-23-1031 | GDE1       | ENST00000353258 | p.T120T  | c.360T>A  | Verified   | ACG | ACT | GAT | 3 | T | A |
| TCGA-04-1338 | GJB6       | ENST00000400065 | p.I193N  | c.578T>A  | Verified   | ACC | ATT | TTT | 2 | T | A |
| TCGA-13-1481 | GLI1       | ENST00000228682 | p.N632K  | c.1896T>A | Verified   | ccc | aat | gca | 3 | T | A |
| TCGA-13-1507 | GLYATL2    | ENST00000287275 | p.D126E  | c.378T>A  | Verified   | GTA | GAT | TAC | 3 | T | A |
| TCGA-23-2077 | GMPR       | ENST00000259727 | p.A234A  | c.702T>A  | Verified   | GGA | GCT | GGA | 3 | T | A |
| TCGA-24-1104 | GOLPH3L    | ENST00000271732 | p.D120E  | c.360T>A  | Verified   | CTG | GAT | GAA | 3 | T | A |

|              |            |                     |          |           |            |     |     |     |   |   |   |
|--------------|------------|---------------------|----------|-----------|------------|-----|-----|-----|---|---|---|
| TCGA-24-1847 | GPAM       | ENST00000348367     | p.Y705N  | c.2113T>A | Unverified | TGC | TAC | CTG | 1 | T | A |
| TCGA-23-1110 | GPER       | ENST00000397088     | p.F146Y  | c.437T>A  | Verified   | GTC | TTC | TTC | 2 | T | A |
| TCGA-13-1488 | GPHN       | ENST00000478722     | p.I377N  | c.1130T>A | Verified   | GAA | ATC | ATC | 2 | T | A |
| TCGA-13-0714 | GPR101     | ENST00000298110     | p.F256I  | c.766T>A  | Verified   | gag | ttc | cag | 1 | T | A |
| TCGA-24-1470 | GPR128     | ENST00000273352     | p.V453D  | c.1358T>A | Verified   | ACA | GTT | ATA | 2 | T | A |
| TCGA-23-1022 | GPR133     | ENST00000261654     | p.F36Y   | c.107T>A  | Verified   | GGA | TTT | CAG | 2 | T | A |
| TCGA-23-1029 | GPR149     | ENST00000389740     | p.D490E  | c.1470T>A | Unverified | AAG | GAT | GCG | 3 | T | A |
| TCGA-61-1915 | GPR37      | ENST00000303921     | p.F360I  | c.1078T>A | Unverified | CGC | TTC | CGT | 1 | T | A |
| TCGA-23-1032 | GPRC6A     | ENST00000310357     | p.I99N   | c.296T>A  | Verified   | GAA | ATC | TAT | 2 | T | A |
| TCGA-29-1693 | GRASP      | ENST00000293662     | p.D108E  | c.324T>A  | Unverified | GAG | GAT | AAC | 3 | T | A |
| TCGA-20-1687 | GRIN3A     | ENST00000361820     | p.F463I  | c.1387T>A | Unverified | AAC | TTT | TTC | 1 | T | A |
| TCGA-04-1356 | GRLF1_ENST | ENST00000317082_v61 | p.L671Q  | c.2012T>A | Verified   | TCG | CTA | TCC | 2 | T | A |
| TCGA-04-1347 | GRM3       | ENST00000361669     | p.S496T  | c.1486T>A | Verified   | AAC | TCT | ATC | 1 | T | A |
| TCGA-13-0795 | GRM8       | ENST00000339582     | p.L555L  | c.1665T>A | Verified   | GAA | CTT | TGC | 3 | T | A |
| TCGA-13-0923 | GRPR       | ENST00000380289     | p.N243K  | c.729T>A  | Verified   | TAC | AAT | CTT | 3 | T | A |
| TCGA-24-1469 | GRXCR1     | ENST00000399770     | p.L2H    | c.5T>A    | Verified   | ATG | CTT | AAA | 2 | T | A |
| TCGA-29-1691 | hCG_38941  | ENST00000328828     | p.S139T  | c.415T>A  | Unverified | TAC | TCC | CCA | 1 | T | A |
| TCGA-13-1501 | HCN4       | ENST00000261917     | p.L386I  | c.1156T>A | Verified   | CTC | TTA | CGC | 1 | T | A |
| TCGA-13-1501 | HCN4       | ENST00000261917     | p.L386I  | c.1156T>A | Verified   | CTC | TTA | CGC | 1 | T | A |
| TCGA-29-2427 | HEATR7B2   | ENST00000399564     | p.I783I  | c.2349T>A | Verified   | CTG | ATT | GGT | 3 | T | A |
| TCGA-13-0714 | HECTD1     | ENST00000399332     | p.F2123Y | c.6368T>A | Verified   | GAG | TTT | CGA | 2 | T | A |
| TCGA-23-1123 | HEPACAM2   | ENST00000341723     | p.Y226*  | c.678T>A  | Verified   | ATA | TAT | TAT | 3 | T | A |
| TCGA-23-1123 | HEPACAM2   | ENST00000341723     | p.Y226*  | c.678T>A  | Verified   | ATA | TAT | TAT | 3 | T | A |
| TCGA-24-1845 | HEPHL1     | ENST00000315765     | p.F11I   | c.31T>A   | Unverified | ATC | TTT | CTC | 1 | T | A |
| TCGA-23-1029 | HERC3      | ENST00000402738     | p.S232T  | c.694T>A  | Unverified | gaa | tct | cca | 1 | T | A |
| TCGA-04-1337 | HINT2      | ENST00000259667     | p.V152E  | c.455T>A  | Unverified | CAT | GTA | CTT | 2 | T | A |
| TCGA-24-2262 | HIVEP1     | ENST00000379388     | p.V1644D | c.4931T>A | Verified   | AGT | GTT | CCT | 2 | T | A |
| TCGA-29-1691 | HMMR       | ENST00000358715     | p.A563A  | c.1689T>A | Unverified | AAA | GCT | GAA | 3 | T | A |
| TCGA-09-2049 | HNMT       | ENST00000280097     | p.S201T  | c.601T>A  | Verified   | ACA | TCA | GAT | 1 | T | A |
| TCGA-29-1703 | HRNR       | ENST00000368801     | p.I88N   | c.263T>A  | Unverified | AAA | ATC | ATT | 2 | T | A |
| TCGA-13-0919 | HSF5       | ENST00000323777     | p.S500T  | c.1498T>A | Verified   | TCT | TCA | GTA | 1 | T | A |
| TCGA-25-2400 | HTR1F      | ENST00000319595     | p.L230H  | c.689T>A  | Verified   | GTC | CTT | TTG | 2 | T | A |
| TCGA-13-0920 | HTR2C      | ENST00000371951     | p.W55R   | c.163T>A  | Unverified | aac | tgg | cca | 1 | T | A |
| TCGA-24-2288 | HTT        | ENST00000355072     | p.W2420R | c.7258T>A | Unverified | GGA | TGG | TCA | 1 | T | A |

|              |          |                 |          |           |            |     |     |     |   |   |   |
|--------------|----------|-----------------|----------|-----------|------------|-----|-----|-----|---|---|---|
| TCGA-13-0886 | HUWE1    | XM_497119.1     | p.S1503T | c.4507T>A | Verified   | gat | tct | gcc | 1 | T | A |
| TCGA-23-1118 | HYDIN    | ENST00000321489 | p.I595N  | c.1784T>A | Verified   | TTG | ATC | CCC | 2 | T | A |
| TCGA-24-1604 | IARS2    | ENST00000302637 | p.V709D  | c.2126T>A | Verified   | GAA | GTT | GCA | 2 | T | A |
| TCGA-13-1509 | IFNB1    | ENST00000380232 | p.N111K  | c.333T>A  | Verified   | GCT | AAT | GTC | 3 | T | A |
| TCGA-20-1685 | IGHMBP2  | ENST00000255078 | p.L59Q   | c.176T>A  | Unverified | GGG | CTG | TAC | 2 | T | A |
| TCGA-09-0369 | IL18RAP  | ENST00000264260 | p.L265H  | c.794T>A  | Verified   | GAA | CTT | GGA | 2 | T | A |
| TCGA-09-0369 | IL18RAP  | ENST00000264260 | p.L265H  | c.794T>A  | Verified   | GAA | CTT | GGA | 2 | T | A |
| TCGA-30-1891 | IL24     | ENST00000294984 | p.F170I  | c.508T>A  | Unverified | CGG | TTT | CTG | 1 | T | A |
| TCGA-24-1563 | IL8      | ENST00000307407 | p.L32H   | c.95T>A   | Verified   | GAA | CTT | AGA | 2 | T | A |
| TCGA-24-1422 | ITIH1    | ENST00000273283 | p.V669E  | c.2006T>A | Unverified | GGC | GTG | GAC | 2 | T | A |
| TCGA-24-1563 | ITLN1    | ENST00000326245 | p.Y66N   | c.196T>A  | Verified   | ATC | TAC | CAG | 1 | T | A |
| TCGA-23-2078 | ITPR1    | ENST00000456211 | p.S421S  | c.1263T>A | Verified   | GTT | TCT | CCT | 3 | T | A |
| TCGA-23-1110 | JMJD1C   | ENST00000402544 | p.V2071E | c.6212T>A | Verified   | TTT | GTA | CGT | 2 | T | A |
| TCGA-61-2008 | KANK4    | ENST00000371153 | p.M413K  | c.1238T>A | Verified   | GTG | ATG | GTG | 2 | T | A |
| TCGA-24-2290 | KARS     | ENST00000302445 | p.I551N  | c.1652T>A | Verified   | GGC | ATT | GAT | 2 | T | A |
| TCGA-24-2290 | KARS     | ENST00000302445 | p.I551N  | c.1652T>A | Verified   | GGC | ATT | GAT | 2 | T | A |
| TCGA-04-1649 | KCNA6    | ENST00000280684 | p.P485P  | c.1455T>A | Unverified | CAG | CCT | GCG | 3 | T | A |
| TCGA-13-0904 | KCNH7    | ENST00000332142 | p.L828H  | c.2483T>A | Verified   | GCC | CTC | ACA | 2 | T | A |
| TCGA-20-1687 | KCNMB1   | ENST00000274629 | p.F148I  | c.442T>A  | Unverified | CTA | TTC | CAG | 1 | T | A |
| TCGA-23-1124 | KDEL3    | ENST00000216014 | p.F194Y  | c.581T>A  | Verified   | GAC | TTC | TTC | 2 | T | A |
| TCGA-30-1857 | KDM4D    | ENST00000335080 | p.L377H  | c.1130T>A | Unverified | caa | ctc | cct | 2 | T | A |
| TCGA-13-0755 | KIAA1109 | ENST00000264501 | p.P1460P | c.4380T>A | Verified   | CAT | CCT | TCT | 3 | T | A |
| TCGA-04-1361 | KIAA1210 | XM_172801.3     | p.L189M  | c.565T>A  | Verified   | aac | ttg | gta | 1 | T | A |
| TCGA-04-1361 | KIAA1210 | XM_172801.3     | p.L189M  | c.565T>A  | Verified   | aac | ttg | gta | 1 | T | A |
| TCGA-29-1784 | KIAA1274 | ENST00000263563 | p.I749N  | c.2246T>A | Unverified | ATC | ATC | TGC | 2 | T | A |
| TCGA-13-0913 | KIAA1919 | ENST00000368847 | p.F81Y   | c.242T>A  | Verified   | CCT | TTT | TGC | 2 | T | A |
| TCGA-24-1469 | KIR2DL3  | ENST00000342376 | p.V11V   | c.33T>A   | Unverified | TGT | GTT | GGG | 3 | T | A |
| TCGA-25-1318 | KIR3DL1  | ENST00000391728 | p.L133Q  | c.398T>A  | Verified   | CCC | CTG | GTG | 2 | T | A |
| TCGA-25-1318 | KIR3DL1  | ENST00000391728 | p.L133Q  | c.398T>A  | Verified   | CCC | CTG | GTG | 2 | T | A |
| TCGA-13-0760 | KIR3DL3  | ENST00000291860 | p.L202I  | c.604T>A  | Verified   | CAC | TTA | CCC | 1 | T | A |
| TCGA-04-1367 | KIRREL3  | ENST00000278934 | p.M296K  | c.887T>A  | Verified   | CGG | ATG | ACC | 2 | T | A |
| TCGA-24-1844 | KLHL3    | ENST00000309755 | p.D545E  | c.1635T>A | Unverified | GGG | GAT | GAT | 3 | T | A |
| TCGA-23-1031 | KRT79    | ENST00000330553 | p.F105L  | c.315T>A  | Verified   | ACG | TTT | GGG | 3 | T | A |
| TCGA-29-1711 | KRTAP4-2 | ENST00000377726 | p.C35S   | c.103T>A  | Unverified | ACC | TGC | TGC | 1 | T | A |

|              |            |                 |          |           |            |     |     |     |   |   |   |
|--------------|------------|-----------------|----------|-----------|------------|-----|-----|-----|---|---|---|
| TCGA-29-1711 | KRTAP4-2   | ENST00000377726 | p.C35S   | c.103T>A  | Unverified | ACC | TGC | TGC | 1 | T | A |
| TCGA-04-1649 | KRTDAP     | ENST00000338897 | p.I3N    | c.8T>A    | Unverified | AAG | ATC | CCG | 2 | T | A |
| TCGA-13-0792 | LAIR1      | ENST00000391742 | p.L175H  | c.524T>A  | Verified   | TTC | CTC | TTC | 2 | T | A |
| TCGA-13-0885 | LAMA1      | ENST00000389658 | p.C1041S | c.3121T>A | Verified   | GGG | TGC | CAG | 1 | T | A |
| TCGA-24-1422 | LAMA3      | ENST00000313654 | p.S2220R | c.6660T>A | Verified   | ctg | agt | tcc | 3 | T | A |
| TCGA-09-1674 | LAMC1      | ENST00000258341 | p.C316S  | c.946T>A  | Unverified | GAC | TGT | GAA | 1 | T | A |
| TCGA-04-1336 | LAMC1      | ENST00000258341 | p.D835E  | c.2505T>A | Verified   | ATC | GAT | CCC | 3 | T | A |
| TCGA-61-2113 | LARP7      | ENST00000324052 | p.D302E  | c.906T>A  | Unverified | GAA | GAT | GCA | 3 | T | A |
| TCGA-29-1699 | LATS1_ENST | ENST00000253339 | p.L894I  | c.2680T>A | Unverified | CCA | TTA | GAG | 1 | T | A |
| TCGA-29-1699 | LATS1_ENST | ENST00000543571 | p.L894I  | c.2680T>A | Unverified | CCA | TTA | GAG | 1 | T | A |
| TCGA-04-1331 | LDLOC1L    | ENST00000341255 | p.I153N  | c.458T>A  | Unverified | GCT | ATC | CCC | 2 | T | A |
| TCGA-09-1665 | LHFPL4     | ENST00000287585 | p.L190H  | c.569T>A  | Verified   | ATC | CTC | TCC | 2 | T | A |
| TCGA-13-0761 | LHFPL4     | ENST00000287585 | p.V241E  | c.722T>A  | Verified   | CCC | GTG | GCT | 2 | T | A |
| TCGA-13-0761 | LHFPL4     | ENST00000287585 | p.V241E  | c.722T>A  | Verified   | CCC | GTG | GCT | 2 | T | A |
| TCGA-23-1120 | LIX1L      | ENST00000369308 | p.S197S  | c.591T>A  | Verified   | GCA | TCT | TTT | 3 | T | A |
| TCGA-24-1843 | LMO7       | ENST00000341547 | p.D821E  | c.2463T>A | Unverified | ACT | GAT | TTC | 3 | T | A |
| TCGA-24-1843 | LMO7_ENST  | ENST00000357063 | p.D1155E | c.3465T>A | Unverified | ACT | GAT | TTC | 3 | T | A |
| TCGA-24-1843 | LMO7_ENST  | ENST00000465261 | p.D870E  | c.2610T>A | Unverified | ACT | GAT | TTC | 3 | T | A |
| TCGA-23-1118 | LOC652153  | ENST00000316490 | p.I595N  | c.1784T>A | Verified   | TTG | ATC | CCC | 2 | T | A |
| TCGA-13-0887 | LOC653192  | ENST00000272598 | p.F371I  | c.1111T>A | Unverified | ATA | TTT | CTT | 1 | T | A |
| TCGA-23-1022 | LPHN3      | ENST00000512091 | p.S261T  | c.781T>A  | Verified   | AAA | TCT | GAC | 1 | T | A |
| TCGA-04-1356 | LPPR4      | ENST00000370185 | p.S444T  | c.1330T>A | Verified   | CGA | TCA | AAG | 1 | T | A |
| TCGA-61-2012 | LPPR4      | ENST00000370185 | p.F286L  | c.858T>A  | Verified   | ACA | TTT | ATC | 3 | T | A |
| TCGA-20-1687 | LPXN       | ENST00000395074 | p.F294L  | c.882T>A  | Unverified | TGC | TTT | GTT | 3 | T | A |
| TCGA-20-1687 | LPXN_ENST  | ENST00000528954 | p.F299L  | c.897T>A  | Unverified | TGC | TTT | GTT | 3 | T | A |
| TCGA-09-1665 | LRP1B      | ENST00000389484 | p.F2895L | c.8685T>A | Verified   | TCA | TTT | TTT | 3 | T | A |
| TCGA-13-1498 | LRRK4C     | ENST00000278198 | p.I530I  | c.1590T>A | Verified   | ATC | ATT | GGG | 3 | T | A |
| TCGA-10-0930 | LRRK7      | ENST00000035383 | p.V1364E | c.4091T>A | Verified   | GAT | GTA | CCT | 2 | T | A |
| TCGA-10-0930 | LRRK7      | ENST00000035383 | p.V1364E | c.4091T>A | Verified   | GAT | GTA | CCT | 2 | T | A |
| TCGA-13-0795 | LRRK2      | SU_LRRK2        | p.S1283T | c.3847T>A | Verified   | aga | tcc | ttt | 1 | T | A |
| TCGA-23-1032 | LRRK2      | SU_LRRK2        | p.C1152* | c.3456T>A | Unverified | gct | tgt | cct | 3 | T | A |
| TCGA-13-0795 | LRRK2_ENST | ENST00000298910 | p.S1283T | c.3847T>A | Verified   | AGA | TCC | TTT | 1 | T | A |
| TCGA-23-1032 | LRRK2_ENST | ENST00000298910 | p.C1152* | c.3456T>A | Unverified | GCT | TGT | CCT | 3 | T | A |
| TCGA-13-0923 | LZTS1      | ENST00000381569 | p.L338H  | c.1013T>A | Verified   | CAG | CTT | CAG | 2 | T | A |

|              |           |                 |          |            |            |     |     |     |   |   |   |
|--------------|-----------|-----------------|----------|------------|------------|-----|-----|-----|---|---|---|
| TCGA-24-1474 | LZTS2     | ENST00000370220 | p.M354K  | c.1061T>A  | Unverified | ACC | ATG | TGC | 2 | T | A |
| TCGA-04-1542 | MACC1     | ENST00000332878 | p.S115T  | c.343T>A   | Verified   | GAT | TCC | TCC | 1 | T | A |
| TCGA-04-1362 | MAGEB16   | XM_498354.1     | p.D268E  | c.804T>A   | Verified   | gag | gat | aca | 3 | T | A |
| TCGA-09-1665 | MAGEB6    | ENST00000379034 | p.Y229N  | c.685T>A   | Verified   | gag | tac | aag | 1 | T | A |
| TCGA-09-2049 | MAGEC1    | ENST00000285879 | p.S857T  | c.2569T>A  | Verified   | atc | tcc | ttc | 1 | T | A |
| TCGA-13-0714 | MAN2A1    | ENST00000261483 | p.S1010T | c.3028T>A  | Verified   | ACT | TCT | TCT | 1 | T | A |
| TCGA-23-2078 | MAN2B2    | ENST00000285599 | p.T426T  | c.1278T>A  | Unverified | GGG | ACT | GAG | 3 | T | A |
| TCGA-13-0916 | MAP2      | ENST00000360351 | p.S1227S | c.3681T>A  | Verified   | GTA | TCT | GAA | 3 | T | A |
| TCGA-13-1498 | MAST2     | NM_015112       | p.Y625N  | c.1873T>A  | Verified   | gag | tac | tta | 1 | T | A |
| TCGA-13-1498 | MAST2_ENS | ENST00000361297 | p.Y625N  | c.1873T>A  | Verified   | GAG | TAC | TTA | 1 | T | A |
| TCGA-13-1505 | MC2R      | ENST00000399821 | p.L66M   | c.196T>A   | Verified   | AGC | TTG | GCC | 1 | T | A |
| TCGA-29-1693 | MC3R      | NM_019888.2     | p.V166E  | c.497T>A   | Unverified | ctg | gtg | gcc | 2 | T | A |
| TCGA-29-1784 | MCF2      | ENST00000370576 | p.I377K  | c.1130T>A  | Unverified | TTT | ATA | AAT | 2 | T | A |
| TCGA-29-1784 | MCF2_ENST | ENST00000370573 | p.I377K  | c.1130T>A  | Unverified | TTT | ATA | AAT | 2 | T | A |
| TCGA-29-1784 | MCF2_ENST | ENST00000519895 | p.I437K  | c.1310T>A  | Unverified | TTT | ATA | AAT | 2 | T | A |
| TCGA-09-2051 | MDN1      | ENST00000369393 | p.V4613D | c.13838T>A | Unverified | CCG | GTC | CTC | 2 | T | A |
| TCGA-09-2056 | MEF2A     | ENST00000346108 | p.S379T  | c.1135T>A  | Verified   | AGC | TCT | CTT | 1 | T | A |
| TCGA-24-1417 | MEIG1     | ENST00000378240 | p.Y32*   | c.96T>A    | Unverified | GGA | TAT | CGG | 3 | T | A |
| TCGA-13-0904 | MEMO1     | ENST00000295065 | p.M144K  | c.431T>A   | Verified   | GCC | ATG | GAA | 2 | T | A |
| TCGA-23-1110 | MFN1      | ENST00000263969 | p.F35Y   | c.104T>A   | Verified   | CAT | TTT | GTT | 2 | T | A |
| TCGA-13-0887 | MFSD2B    | ENST00000406420 | p.I246N  | c.737T>A   | Verified   | TGC | ATC | AGT | 2 | T | A |
| TCGA-23-1029 | MKLN1     | ENST00000352689 | p.L179L  | c.537T>A   | Unverified | CGC | CTT | TGC | 3 | T | A |
| TCGA-04-1530 | MLL5      | ENST00000257745 | p.S1471T | c.4411T>A  | Verified   | CCT | TCA | CAG | 1 | T | A |
| TCGA-24-1604 | MMP27     | ENST00000260229 | p.V373E  | c.1118T>A  | Verified   | CGT | GTG | AAG | 2 | T | A |
| TCGA-61-1900 | MON2      | ENST00000393632 | p.M470K  | c.1409T>A  | Unverified | GAA | ATG | TTG | 2 | T | A |
| TCGA-29-1784 | MRC1      | ENST00000239761 | p.A85A   | c.255T>A   | Unverified | GTT | GCT | ATC | 3 | T | A |
| TCGA-29-1698 | MSH5_ENST | ENST00000375703 | p.I590N  | c.1769T>A  | Unverified | GTC | ATC | ACT | 2 | T | A |
| TCGA-29-1698 | MSH5_ENST | ENST00000375742 | p.I607N  | c.1820T>A  | Unverified | GTC | ATC | ACT | 2 | T | A |
| TCGA-61-2012 | MSLNL     | ENST00000293892 | p.L753Q  | c.2258T>A  | Unverified | GCT | CTG | CTG | 2 | T | A |
| TCGA-04-1651 | MSX2      | ENST00000239243 | p.Y166N  | c.496T>A   | Unverified | CAG | TAC | CTC | 1 | T | A |
| TCGA-04-1651 | MSX2      | ENST00000239243 | p.Y166N  | c.496T>A   | Unverified | CAG | TAC | CTC | 1 | T | A |
| TCGA-23-1122 | MTOR      | ENST00000361445 | p.F370Y  | c.1109T>A  | Verified   | aaa | ttt | gat | 2 | T | A |
| TCGA-13-0924 | MUC16     | ENST00000397910 | p.V769D  | c.2306T>A  | Verified   | GCC | GTT | CTT | 2 | T | A |
| TCGA-04-1530 | MUC16     | ENST00000397910 | p.P1368P | c.4104T>A  | Verified   | AGT | CCT | AAA | 3 | T | A |

|              |            |                 |          |           |            |     |     |     |   |   |   |
|--------------|------------|-----------------|----------|-----------|------------|-----|-----|-----|---|---|---|
| TCGA-13-0923 | MUC17      | ENST00000306151 | p.T2314T | c.6942T>A | Unverified | TCT | ACT | GAA | 3 | T | A |
| TCGA-29-1699 | MUC17      | ENST00000306151 | p.P1201P | c.3603T>A | Unverified | CCT | CCT | CCA | 3 | T | A |
| TCGA-13-0920 | MYCT1      | ENST00000367245 | p.L68H   | c.203T>A  | Verified   | GAC | CTT | ATC | 2 | T | A |
| TCGA-23-2078 | MYH13      | ENST00000252172 | p.Y195*  | c.585T>A  | Verified   | CAG | TAT | TTT | 3 | T | A |
| TCGA-13-0755 | MYH15      | ENST00000273353 | p.A396A  | c.1188T>A | Verified   | AAA | GCT | GCT | 3 | T | A |
| TCGA-13-0887 | MYLK       | NM_053025       | p.L761H  | c.2282T>A | Verified   | gcc | ctc | tgc | 2 | T | A |
| TCGA-23-1110 | MYO15A     | ENST00000205890 | p.F2569I | c.7705T>A | Verified   | CAC | TTC | CCA | 1 | T | A |
| TCGA-61-1910 | MYO1B_ENS  | ENST00000392318 | p.Y847N  | c.2539T>A | Unverified | GCT | TAC | TGG | 1 | T | A |
| TCGA-04-1651 | MYOM2      | ENST00000262113 | p.S58T   | c.172T>A  | Unverified | GCC | TCC | AGC | 1 | T | A |
| TCGA-04-1651 | MYOM2      | ENST00000262113 | p.S58T   | c.172T>A  | Unverified | GCC | TCC | AGC | 1 | T | A |
| TCGA-23-1122 | MYOM2      | ENST00000262113 | p.I1092I | c.3276T>A | Verified   | CAG | ATT | CAT | 3 | T | A |
| TCGA-09-2049 | NAT8       | ENST00000272425 | p.M121K  | c.362T>A  | Verified   | GGC | ATG | GTA | 2 | T | A |
| TCGA-24-2035 | NAV2       | ENST00000360655 | p.M881K  | c.2642T>A | Unverified | AGC | ATG | GAT | 2 | T | A |
| TCGA-13-1498 | NCAN       | ENST00000252575 | p.Y1102N | c.3304T>A | Unverified | CGC | TAT | TTT | 1 | T | A |
| TCGA-13-0923 | NCL        | ENST00000322723 | p.A210A  | c.630T>A  | Verified   | gaa | gct | atg | 3 | T | A |
| TCGA-29-1691 | NCOA2      | ENST00000452400 | p.S444T  | c.1330T>A | Unverified | ggt | tct | ggg | 1 | T | A |
| TCGA-13-1501 | NDFIP2     | ENST00000218652 | p.S153R  | c.459T>A  | Verified   | AGT | AGT | ATT | 3 | T | A |
| TCGA-13-1501 | NDFIP2     | ENST00000218652 | p.S153R  | c.459T>A  | Verified   | AGT | AGT | ATT | 3 | T | A |
| TCGA-24-1844 | NDUFB5     | ENST00000259037 | p.F73Y   | c.218T>A  | Unverified | AGA | TTC | TAC | 2 | T | A |
| TCGA-24-2024 | NELL1      | ENST00000357134 | p.I435N  | c.1304T>A | Verified   | GAT | ATT | GAT | 2 | T | A |
| TCGA-20-1686 | NLRP14_ENS | ENST00000299481 | p.G856G  | c.2568T>A | Unverified | TTG | GGT | GAT | 3 | T | A |
| TCGA-13-0884 | NLRP9      | ENST00000332836 | p.P657P  | c.1971T>A | Verified   | CAG | CCT | GTT | 3 | T | A |
| TCGA-24-1604 | NMD3       | ENST00000351193 | p.L164*  | c.491T>A  | Verified   | ACT | TTG | CAT | 2 | T | A |
| TCGA-24-2289 | NMU        | ENST00000264218 | p.L42*   | c.125T>A  | Unverified | ata | tta | cct | 2 | T | A |
| TCGA-29-1784 | NR1H4_ENS  | ENST00000551379 | p.I12N   | c.35T>A   | Unverified | CCA | ATT | CAA | 2 | T | A |
| TCGA-29-1777 | NSD1       | ENST00000439151 | p.F97Y   | c.290T>A  | Unverified | TCC | TTT | CAA | 2 | T | A |
| TCGA-29-1777 | NSD1_ENST  | ENST00000439151 | p.F97Y   | c.290T>A  | Unverified | TCC | TTT | CAA | 2 | T | A |
| TCGA-13-1512 | NT5C3      | ENST00000242210 | p.L192H  | c.575T>A  | Verified   | AAG | CTC | CAA | 2 | T | A |
| TCGA-20-1687 | NUP210L    | ENST00000368559 | p.F358I  | c.1072T>A | Unverified | GGA | TTT | TTA | 1 | T | A |
| TCGA-24-1470 | NUP210L    | ENST00000368559 | p.V1383E | c.4148T>A | Verified   | CGA | GTG | AGC | 2 | T | A |
| TCGA-13-0755 | NXPH2      | ENST00000272641 | p.F108I  | c.322T>A  | Verified   | AAA | TTT | AAG | 1 | T | A |
| TCGA-13-0755 | NXPH2      | ENST00000272641 | p.C20*   | c.60T>A   | Verified   | TTT | TGT | GAC | 3 | T | A |
| TCGA-04-1542 | ODF4       | ENST00000328248 | p.S176T  | c.526T>A  | Verified   | GTA | TCC | ATC | 1 | T | A |
| TCGA-13-1498 | ODZ1       | ENST00000371130 | p.N1155K | c.3465T>A | Verified   | GGG | AAT | GGA | 3 | T | A |

|              |           |                 |         |           |            |     |     |     |   |   |   |
|--------------|-----------|-----------------|---------|-----------|------------|-----|-----|-----|---|---|---|
| TCGA-13-1498 | OLFML1    | ENST00000329293 | p.T135T | c.405T>A  | Verified   | CGG | ACT | CTG | 3 | T | A |
| TCGA-13-0883 | OR10A5    | ENST00000299454 | p.L195Q | c.584T>A  | Verified   | GCA | CTG | TTT | 2 | T | A |
| TCGA-13-0807 | OR10G7    | ENST00000330487 | p.L12H  | c.35T>A   | Verified   | ATC | CTC | ACG | 2 | T | A |
| TCGA-24-1844 | OR10S1    | ENST00000531945 | p.L180Q | c.539T>A  | Unverified | CGC | CTG | CTC | 2 | T | A |
| TCGA-09-2049 | OR12D3    | ENST00000377143 | p.L113Q | c.338T>A  | Verified   | TTA | CTG | GCT | 2 | T | A |
| TCGA-09-2056 | OR1D2     | ENST00000331459 | p.Y176N | c.526T>A  | Verified   | CAC | TAC | ATC | 1 | T | A |
| TCGA-23-1123 | OR2AK2    | ENST00000366480 | p.S22R  | c.66T>A   | Verified   | CAA | AGT | TTT | 3 | T | A |
| TCGA-23-1123 | OR2AK2    | ENST00000366480 | p.S22R  | c.66T>A   | Verified   | CAA | AGT | TTT | 3 | T | A |
| TCGA-24-2267 | OR2F2     | ENST00000408955 | p.L32M  | c.94T>A   | Verified   | TTC | TTG | GTC | 1 | T | A |
| TCGA-30-1857 | OR2J3     | ENST00000377169 | p.F254I | c.760T>A  | Unverified | CTC | TTT | TTC | 1 | T | A |
| TCGA-61-1998 | OR2L2     | ENST00000366479 | p.L13I  | c.37T>A   | Verified   | ATC | TTA | TTG | 1 | T | A |
| TCGA-23-1114 | OR2T11    | ENST00000330803 | p.F154I | c.460T>A  | Unverified | GGC | TTT | CTG | 1 | T | A |
| TCGA-25-1313 | OR2T12    | ENST00000317996 | p.L148H | c.443T>A  | Verified   | TGG | CTC | CTG | 2 | T | A |
| TCGA-61-1910 | OR4E2     | ENST00000408935 | p.F250I | c.748T>A  | Unverified | CTC | TTC | TTT | 1 | T | A |
| TCGA-13-1481 | OR4K2     | ENST00000298642 | p.I285K | c.854T>A  | Verified   | CCA | ATA | ATC | 2 | T | A |
| TCGA-29-1764 | OR4K2     | ENST00000298642 | p.V146E | c.437T>A  | Unverified | GTG | GTG | GCT | 2 | T | A |
| TCGA-13-0924 | OR4K2     | ENST00000298642 | p.N309K | c.927T>A  | Verified   | TTT | AAT | AAG | 3 | T | A |
| TCGA-13-0900 | OR5M9     | ENST00000279791 | p.V246D | c.737T>A  | Verified   | GCT | GTT | TCT | 2 | T | A |
| TCGA-24-1435 | OR6C75    | ENST00000343399 | p.I133N | c.398T>A  | Verified   | ATC | ATC | ATG | 2 | T | A |
| TCGA-04-1530 | OR7D2     | ENST00000344248 | p.G204G | c.612T>A  | Verified   | ACG | GGT | GTG | 3 | T | A |
| TCGA-61-1740 | OR8H1     | ENST00000313022 | p.S310T | c.928T>A  | Unverified | GAC | TCC | AGG | 1 | T | A |
| TCGA-29-1768 | OR8K3     | ENST00000312711 | p.I163N | c.488T>A  | Unverified | AAG | ATT | TTT | 2 | T | A |
| TCGA-23-1123 | P4HA1     | ENST00000263556 | p.G243G | c.729T>A  | Verified   | AAT | GGT | AAC | 3 | T | A |
| TCGA-23-1123 | P4HA1     | ENST00000263556 | p.G243G | c.729T>A  | Verified   | AAT | GGT | AAC | 3 | T | A |
| TCGA-29-2427 | PAAF1     | ENST00000310571 | p.M154K | c.461T>A  | Verified   | GGA | ATG | GAT | 2 | T | A |
| TCGA-24-2289 | PAPLN     | ENST00000340738 | p.M315K | c.944T>A  | Unverified | CAC | ATG | TGC | 2 | T | A |
| TCGA-23-1029 | PCDHB4    | ENST00000194152 | p.F177I | c.529T>A  | Unverified | CAT | TTT | CAC | 1 | T | A |
| TCGA-61-2009 | PCDHGC5   | ENST00000252087 | p.I695N | c.2084T>A | Verified   | CTC | ATT | GTG | 2 | T | A |
| TCGA-61-2009 | PCDHGC5_E | ENST00000252087 | p.I695N | c.2084T>A | Verified   | CTC | ATT | GTG | 2 | T | A |
| TCGA-13-0905 | PDE10A    | ENST00000366882 | p.L254H | c.761T>A  | Verified   | CTA | CTC | GAC | 2 | T | A |
| TCGA-13-0793 | PDE4A     | ENST00000344979 | p.L332H | c.995T>A  | Verified   | GTC | CTC | CTG | 2 | T | A |
| TCGA-04-1361 | PDIA5     | ENST00000316218 | p.I449I | c.1347T>A | Verified   | AAG | ATT | GCC | 3 | T | A |
| TCGA-04-1361 | PDIA5     | ENST00000316218 | p.I449I | c.1347T>A | Verified   | AAG | ATT | GCC | 3 | T | A |
| TCGA-61-1910 | PDPN      | ENST00000294489 | p.W78R  | c.232T>A  | Unverified | ATG | TGG | AAG | 1 | T | A |



|              |            |                 |          |           |            |     |     |     |   |   |   |
|--------------|------------|-----------------|----------|-----------|------------|-----|-----|-----|---|---|---|
| TCGA-24-1463 | PEX3       | ENST00000367591 | p.D174E  | c.522T>A  | Unverified | GGA | GAT | GGC | 3 | T | A |
| TCGA-29-1781 | PGAP1      | ENST00000354764 | p.L343I  | c.1027T>A | Unverified | GAC | TTA | ACA | 1 | T | A |
| TCGA-30-1891 | PHF20      | ENST00000374012 | p.V816E  | c.2447T>A | Unverified | GCA | GTG | GAG | 2 | T | A |
| TCGA-23-1114 | PHKA1      | ENST00000373542 | p.F594I  | c.1780T>A | Unverified | TAT | TTT | GGT | 1 | T | A |
| TCGA-29-1703 | PHRF1      | ENST00000416188 | p.C186S  | c.556T>A  | Unverified | TTC | TGT | GAG | 1 | T | A |
| TCGA-29-1703 | PHRF1_ENS  | ENST00000416188 | p.C186S  | c.556T>A  | Unverified | TTC | TGT | GAG | 1 | T | A |
| TCGA-13-0885 | PIP4K2A    | ENST00000376573 | p.I401N  | c.1202T>A | Verified   | ttt | att | ggc | 2 | T | A |
| TCGA-29-1783 | PKHD1L1    | ENST00000378402 | p.F2614Y | c.7841T>A | Unverified | TTT | TTT | AAC | 2 | T | A |
| TCGA-25-1326 | PLAC1L     | ENST00000278855 | p.L148I  | c.442T>A  | Verified   | GAG | TTA | GGA | 1 | T | A |
| TCGA-04-1347 | PLEKHA3    | ENST00000234453 | p.W19R   | c.55T>A   | Verified   | cgt | tgg | ttt | 1 | T | A |
| TCGA-23-1031 | PNN        | ENST00000216832 | p.D436E  | c.1308T>A | Verified   | CCA | GAT | AAA | 3 | T | A |
| TCGA-29-1784 | POLR1A     | ENST00000263857 | p.S1689T | c.5065T>A | Unverified | GGA | TCC | CAC | 1 | T | A |
| TCGA-29-1705 | POLR2B     | ENST00000381227 | p.C357S  | c.1069T>A | Unverified | TTT | TGT | GAG | 1 | T | A |
| TCGA-24-1103 | POLR2B     | ENST00000381227 | p.S250R  | c.750T>A  | Verified   | AAG | AGT | GCT | 3 | T | A |
| TCGA-23-1022 | PPFIA4     | XM_046751.7     | p.W1178R | c.3532T>A | Verified   | gtc | tgg | acc | 1 | T | A |
| TCGA-61-1738 | PPP1R3B    | ENST00000310455 | p.M243K  | c.728T>A  | Unverified | GGA | ATG | ACC | 2 | T | A |
| TCGA-61-1738 | PPP1R3B    | ENST00000310455 | p.M243K  | c.728T>A  | Unverified | GGA | ATG | ACC | 2 | T | A |
| TCGA-29-1784 | PPP2R3A    | ENST00000264977 | p.F1089I | c.3265T>A | Unverified | cgg | ttt | gcc | 1 | T | A |
| TCGA-09-1665 | PPP2R3A    | ENST00000264977 | p.S723R  | c.2169T>A | Verified   | tgt | agt | aat | 3 | T | A |
| TCGA-29-1784 | PPP2R3A_EI | ENST00000334546 | p.F468I  | c.1402T>A | Unverified | CGG | TTT | GCC | 1 | T | A |
| TCGA-24-1844 | PRAMEF12   | ENST00000357726 | p.L9H    | c.26T>A   | Unverified | AGA | CTC | CTG | 2 | T | A |
| TCGA-29-1761 | PRDM2      | ENST00000235372 | p.D924E  | c.2772T>A | Unverified | CCA | GAT | CCT | 3 | T | A |
| TCGA-13-0904 | PRKAA2_EN  | ENST00000371244 | p.H73Q   | c.219T>A  | Verified   | CGT | CAT | CCT | 3 | T | A |
| TCGA-13-0905 | PRKCB      | ENST00000303531 | p.C386S  | c.1156T>A | Verified   | GAG | TGC | ACT | 1 | T | A |
| TCGA-29-1702 | PRKCB      | ENST00000303531 | p.C67S   | c.199T>A  | Unverified | CAG | TGC | CAA | 1 | T | A |
| TCGA-29-1702 | PRKCB_ENS  | ENST00000303531 | p.C67S   | c.199T>A  | Unverified | CAG | TGC | CAA | 1 | T | A |
| TCGA-29-1702 | PRKCB_ENS  | ENST00000321728 | p.C67S   | c.199T>A  | Unverified | CAG | TGC | CAA | 1 | T | A |
| TCGA-13-0885 | PRMT10     | ENST00000322396 | p.L157L  | c.471T>A  | Verified   | ATG | CTT | AAT | 3 | T | A |
| TCGA-13-0916 | PROX1      | ENST00000498508 | p.S275T  | c.823T>A  | Verified   | ctg | tct | gaa | 1 | T | A |
| TCGA-24-2035 | PRPF6      | ENST00000266079 | p.V392V  | c.1176T>A | Verified   | CGG | GTT | CTT | 3 | T | A |
| TCGA-04-1343 | PRR5L      | ENST00000378867 | p.L89H   | c.266T>A  | Verified   | GAA | CTT | GGA | 2 | T | A |
| TCGA-23-2078 | PSG1_ENST  | ENST00000449000 | p.W67R   | c.199T>A  | Unverified | ATC | TGG | TAC | 1 | T | A |
| TCGA-23-2078 | PSG2       | ENST00000406487 | p.W67R   | c.199T>A  | Unverified | ATC | TGG | TAC | 1 | T | A |
| TCGA-25-1326 | PTCRA      | ENST00000304672 | p.V52D   | c.155T>A  | Verified   | GAT | GTT | GCA | 2 | T | A |

|              |             |                 |          |            |            |     |     |     |   |   |   |
|--------------|-------------|-----------------|----------|------------|------------|-----|-----|-----|---|---|---|
| TCGA-23-1114 | PTPN13      | ENST00000436978 | p.L1793H | c.5378T>A  | Unverified | CTC | CTC | ATT | 2 | T | A |
| TCGA-13-0920 | PTPN4       | ENST00000263708 | p.T39T   | c.117T>A   | Verified   | aac | act | gta | 3 | T | A |
| TCGA-24-1847 | PTPRJ       | ENST00000418331 | p.M1281K | c.3842T>A  | Unverified | TTA | ATG | GTG | 2 | T | A |
| TCGA-24-1847 | PTPRJ_ENST  | ENST00000418331 | p.M1281K | c.3842T>A  | Unverified | TTA | ATG | GTG | 2 | T | A |
| TCGA-13-0887 | PTPRK       | ENST00000368226 | p.S1304S | c.3912T>A  | Verified   | atg | tct | tgt | 3 | T | A |
| TCGA-24-2280 | RAB11FIP1   | ENST00000330843 | p.S190T  | c.568T>A   | Unverified | GCC | TCC | GCC | 1 | T | A |
| TCGA-29-1693 | RAGE        | ENST00000361847 | p.W166R  | c.496T>A   | Unverified | cgc | tgg | tac | 1 | T | A |
| TCGA-30-1855 | RAPGEF4     | NM_007023.1     | p.Y395N  | c.1183T>A  | Unverified | tgg | tac | att | 1 | T | A |
| TCGA-04-1361 | RDH8        | ENST00000171214 | p.L87Q   | c.260T>A   | Verified   | GTG | CTG | GTG | 2 | T | A |
| TCGA-04-1361 | RDH8        | ENST00000171214 | p.L87Q   | c.260T>A   | Verified   | GTG | CTG | GTG | 2 | T | A |
| TCGA-30-1857 | RFC5        | ENST00000454402 | p.I326N  | c.977T>A   | Unverified | ctc | att | gct | 2 | T | A |
| TCGA-25-1313 | RGS22       | ENST00000360863 | p.Y407*  | c.1221T>A  | Verified   | ACT | TAT | GAC | 3 | T | A |
| TCGA-13-0893 | RGS4        | ENST00000367909 | p.L107Q  | c.320T>A   | Verified   | aaa | cta | agt | 2 | T | A |
| TCGA-13-0807 | RGS7        | ENST00000366565 | p.L145H  | c.434T>A   | Verified   | GAG | CTC | GCA | 2 | T | A |
| TCGA-24-1103 | RIPK2       | ENST00000220751 | p.I208N  | c.623T>A   | Verified   | AGT | ATC | AAG | 2 | T | A |
| TCGA-29-1783 | RNF148      | ENST00000434824 | p.F262I  | c.784T>A   | Unverified | TGC | TTT | GAC | 1 | T | A |
| TCGA-29-1783 | RNF148_ENST | ENST00000434824 | p.F262I  | c.784T>A   | Unverified | TGC | TTT | GAC | 1 | T | A |
| TCGA-61-1915 | RNF157      | XM_290732.4     | p.S428R  | c.1284T>A  | Unverified | gat | agt | ggc | 3 | T | A |
| TCGA-09-2056 | RNF19A      | ENST00000519449 | p.I309K  | c.926T>A   | Verified   | ata | ata | aag | 2 | T | A |
| TCGA-29-1770 | RNF213      | ENST00000336301 | p.W1733R | c.5197T>A  | Unverified | CCC | TGG | GCA | 1 | T | A |
| TCGA-04-1336 | RNF213      | ENST00000336301 | p.L2463H | c.7388T>A  | Unverified | AGC | CTC | CAC | 2 | T | A |
| TCGA-29-1770 | RNF213_ENST | ENST00000411702 | p.W3709R | c.11125T>A | Unverified | CCC | TGG | GCA | 1 | T | A |
| TCGA-04-1336 | RNF213_ENST | ENST00000411702 | p.L4439H | c.13316T>A | Unverified | AGC | CTC | CAC | 2 | T | A |
| TCGA-23-1116 | ROBO1_ENST  | ENST00000464233 | p.S1609T | c.4825T>A  | Unverified | TCA | TCA | AGA | 1 | T | A |
| TCGA-23-1116 | ROBO1_ENST  | ENST00000464233 | p.S1609T | c.4825T>A  | Unverified | TCA | TCA | AGA | 1 | T | A |
| TCGA-61-2094 | ROBO2       | ENST00000461745 | p.Y388N  | c.1162T>A  | Unverified | GGT | TAC | TAC | 1 | T | A |
| TCGA-23-1032 | ROBO2       | ENST00000461745 | p.I973N  | c.2918T>A  | Verified   | GCC | ATT | TAT | 2 | T | A |
| TCGA-61-2094 | ROBO2_ENST  | ENST00000487694 | p.Y404N  | c.1210T>A  | Unverified | GGT | TAC | TAC | 1 | T | A |
| TCGA-24-1422 | RP1         | ENST00000220676 | p.V1264E | c.3791T>A  | Verified   | ACT | GTA | AAT | 2 | T | A |
| TCGA-29-1781 | RRAGA       | ENST00000380527 | p.S257T  | c.769T>A   | Unverified | AAT | TCC | AAC | 1 | T | A |
| TCGA-24-2288 | RSBN1L      | ENST00000334955 | p.S683R  | c.2049T>A  | Unverified | TGC | AGT | TTA | 3 | T | A |
| TCGA-23-1122 | RSPRY1      | ENST00000394420 | p.P416P  | c.1248T>A  | Verified   | AAG | CCT | CAC | 3 | T | A |
| TCGA-25-2398 | RYR1        | ENST00000359596 | p.M80K   | c.239T>A   | Unverified | GAG | ATG | CTG | 2 | T | A |
| TCGA-04-1347 | RYR2        | ENST00000366574 | p.V3045E | c.9134T>A  | Verified   | ACA | GTG | ATG | 2 | T | A |

|              |           |                 |          |           |            |     |     |     |   |   |   |
|--------------|-----------|-----------------|----------|-----------|------------|-----|-----|-----|---|---|---|
| TCGA-24-1845 | S100A11   | ENST00000271638 | p.F77Y   | c.230T>A  | Unverified | GAT | TTC | TCA | 2 | T | A |
| TCGA-13-0904 | SACS      | NM_014363.3     | p.V1543E | c.4628T>A | Verified   | agt | gta | aag | 2 | T | A |
| TCGA-25-1313 | SCAF1     | ENST00000360565 | p.I227N  | c.680T>A  | Unverified | GAT | ATC | TAT | 2 | T | A |
| TCGA-61-1998 | SCARF1    | ENST00000263071 | p.C41S   | c.121T>A  | Unverified | CAG | TGC | TGC | 1 | T | A |
| TCGA-04-1343 | SCN3A     | ENST00000283254 | p.L719H  | c.2156T>A | Verified   | GAA | CTT | GAA | 2 | T | A |
| TCGA-13-1408 | SCN4A     | ENST00000435607 | p.V1203D | c.3608T>A | Unverified | GAG | GTC | AAC | 2 | T | A |
| TCGA-25-2400 | SCN7A_ENS | ENST00000409855 | p.L152L  | c.456T>A  | Unverified | TTG | CTT | GGA | 3 | T | A |
| TCGA-25-2401 | SELP      | ENST00000367790 | p.S596T  | c.1786T>A | Verified   | GGC | TCC | ACC | 1 | T | A |
| TCGA-13-0884 | SENP8     | ENST00000542035 | p.C175*  | c.525T>A  | Verified   | TTG | TGT | CAG | 3 | T | A |
| TCGA-13-0760 | SEPN1     | ENST00000361547 | p.L210L  | c.630T>A  | Verified   | TTC | CTT | CCC | 3 | T | A |
| TCGA-30-1856 | SERPINA4  | ENST00000557004 | p.I396N  | c.1187T>A | Unverified | CAC | ATC | CTG | 2 | T | A |
| TCGA-24-2280 | SERPINA7  | ENST00000327674 | p.F82Y   | c.245T>A  | Unverified | TCC | TTT | GGG | 2 | T | A |
| TCGA-29-1784 | SETBP1    | ENST00000282030 | p.S1330T | c.3988T>A | Unverified | TCC | TCC | ATG | 1 | T | A |
| TCGA-13-0923 | SETD2     | ENST00000330022 | p.I1297N | c.3890T>A | Verified   | GAG | ATT | ATA | 2 | T | A |
| TCGA-24-2290 | SETD2     | ENST00000330022 | p.Y1673* | c.5019T>A | Verified   | GCC | TAT | GTG | 3 | T | A |
| TCGA-24-2290 | SETD2     | ENST00000330022 | p.Y1673* | c.5019T>A | Verified   | GCC | TAT | GTG | 3 | T | A |
| TCGA-13-0923 | SETD2_ENS | ENST00000409792 | p.I1800N | c.5399T>A | Verified   | GAG | ATT | ATA | 2 | T | A |
| TCGA-24-2290 | SETD2_ENS | ENST00000409792 | p.Y2176* | c.6528T>A | Verified   | GCC | TAT | GTG | 3 | T | A |
| TCGA-24-2290 | SETD2_ENS | ENST00000409792 | p.Y2176* | c.6528T>A | Verified   | GCC | TAT | GTG | 3 | T | A |
| TCGA-13-0920 | SEZ6L2    | ENST00000308713 | p.S48T   | c.142T>A  | Verified   | GCC | TCT | GAG | 1 | T | A |
| TCGA-29-1691 | SH2D7     | ENST00000328828 | p.S275T  | c.823T>A  | Unverified | TAC | TCC | CCA | 1 | T | A |
| TCGA-24-1847 | SHROOM4   | ENST00000289292 | p.L106Q  | c.317T>A  | Unverified | aag | ctg | ctg | 2 | T | A |
| TCGA-13-1408 | SIM1      | ENST00000262901 | p.C605S  | c.1813T>A | Verified   | CTG | TGT | TTT | 1 | T | A |
| TCGA-13-0886 | SLC17A1   | ENST00000244527 | p.L22M   | c.64T>A   | Verified   | GGA | TTG | TCT | 1 | T | A |
| TCGA-23-1110 | SLC22A10  | ENST00000332793 | p.S81T   | c.241T>A  | Verified   | GAC | TCA | AAT | 1 | T | A |
| TCGA-04-1655 | SLC22A14  | ENST00000273173 | p.I542N  | c.1625T>A | Unverified | CCC | ATC | TTT | 2 | T | A |
| TCGA-61-1737 | SLC22A9   | ENST00000279178 | p.S126T  | c.376T>A  | Unverified | ATC | TCC | TTC | 1 | T | A |
| TCGA-13-0900 | SLC24A4   | ENST00000298877 | p.V422D  | c.1265T>A | Verified   | TGC | GTC | ACC | 2 | T | A |
| TCGA-04-1651 | SLC24A5   | ENST00000341459 | p.S84T   | c.250T>A  | Unverified | ATA | TCT | ATT | 1 | T | A |
| TCGA-04-1651 | SLC24A5   | ENST00000341459 | p.S84T   | c.250T>A  | Unverified | ATA | TCT | ATT | 1 | T | A |
| TCGA-23-1124 | SLC38A11  | ENST00000303735 | p.L99H   | c.296T>A  | Verified   | AAG | CTT | GGA | 2 | T | A |
| TCGA-29-1764 | SLC39A12  | ENST00000377374 | p.L401*  | c.1202T>A | Unverified | ATC | TTA | CAG | 2 | T | A |
| TCGA-61-1904 | SLC39A9   | ENST00000336643 | p.I24N   | c.71T>A   | Unverified | ATC | ATT | CCC | 2 | T | A |
| TCGA-13-0913 | SLC4A11   | ENST00000380056 | p.F68Y   | c.203T>A  | Verified   | GCC | TTC | GAC | 2 | T | A |

|              |            |                 |          |           |            |     |     |     |   |   |   |
|--------------|------------|-----------------|----------|-----------|------------|-----|-----|-----|---|---|---|
| TCGA-23-1120 | SLCO4A1    | ENST00000370507 | p.S560T  | c.1678T>A | Unverified | TCC | TCT | GGT | 1 | T | A |
| TCGA-29-1698 | SLMAP      | ENST00000295951 | p.N281K  | c.843T>A  | Unverified | AGT | AAT | ACT | 3 | T | A |
| TCGA-24-1422 | SMC2       | ENST00000286398 | p.V1072D | c.3215T>A | Verified   | aag | gtt | gcc | 2 | T | A |
| TCGA-25-2391 | SNCA       | ENST00000394986 | p.A19A   | c.57T>A   | Unverified | GCT | GCT | GAG | 3 | T | A |
| TCGA-25-1313 | SNTG1      | ENST00000518864 | p.L186*  | c.557T>A  | Verified   | ACA | TTA | TCA | 2 | T | A |
| TCGA-09-2050 | SNTG2      | ENST00000308624 | p.N70K   | c.210T>A  | Verified   | AGG | AAT | CGC | 3 | T | A |
| TCGA-24-1844 | SNX31      | ENST00000311812 | p.F347I  | c.1039T>A | Unverified | AGA | TTT | CAA | 1 | T | A |
| TCGA-24-2280 | SOCS2      | ENST00000340600 | p.I72N   | c.215T>A  | Unverified | ttg | att | aga | 2 | T | A |
| TCGA-61-1738 | SORCS1     | ENST00000263054 | p.Y536N  | c.1606T>A | Unverified | CCC | TAC | ACA | 1 | T | A |
| TCGA-61-1738 | SORCS1     | ENST00000263054 | p.Y536N  | c.1606T>A | Unverified | CCC | TAC | ACA | 1 | T | A |
| TCGA-61-1738 | SORCS1_EN! | ENST00000344440 | p.Y536N  | c.1606T>A | Unverified | CCC | TAC | ACA | 1 | T | A |
| TCGA-61-1738 | SORCS1_EN! | ENST00000344440 | p.Y536N  | c.1606T>A | Unverified | CCC | TAC | ACA | 1 | T | A |
| TCGA-24-1845 | SP140_ENST | ENST00000392045 | p.C478S  | c.1432T>A | Unverified | GCG | TGT | GGC | 1 | T | A |
| TCGA-13-0923 | SP4        | ENST00000222584 | p.D388E  | c.1164T>A | Verified   | CAG | GAT | CAA | 3 | T | A |
| TCGA-24-1847 | SPARC      | ENST00000231061 | p.L8H    | c.23T>A   | Unverified | TTT | CTC | CTT | 2 | T | A |
| TCGA-13-0791 | SPATS2L    | ENST00000409718 | p.I136K  | c.407T>A  | Verified   | TCG | ATA | CTT | 2 | T | A |
| TCGA-25-2400 | SPERT      | ENST00000310521 | p.L257Q  | c.770T>A  | Unverified | GCG | CTG | CAG | 2 | T | A |
| TCGA-24-1844 | SPINK14    | ENST00000356972 | p.V7E    | c.20T>A   | Unverified | CCA | GTA | TTC | 2 | T | A |
| TCGA-13-0883 | SPRED2     | ENST00000356388 | p.V19E   | c.56T>A   | Verified   | GCT | GTG | GTT | 2 | T | A |
| TCGA-13-0919 | SPTBN1     | ENST00000356805 | p.L1314* | c.3941T>A | Unverified | TGG | TTG | AAG | 2 | T | A |
| TCGA-29-1698 | SPTBN2     | ENST00000309996 | p.S2119T | c.6355T>A | Unverified | GCT | TCT | GAC | 1 | T | A |
| TCGA-13-1510 | SQLE       | ENST00000265896 | p.T3T    | c.9T>A    | Verified   | TGG | ACT | TTT | 3 | T | A |
| TCGA-13-1510 | SRRM2      | ENST00000301740 | p.S554S  | c.1662T>A | Unverified | AGG | TCT | AGG | 3 | T | A |
| TCGA-24-0979 | SSBP3      | ENST00000371319 | p.M285K  | c.854T>A  | Unverified | CCG | ATG | GGT | 2 | T | A |
| TCGA-13-0714 | STAB2      | ENST00000388887 | p.V1128D | c.3383T>A | Verified   | CTG | GTC | CCA | 2 | T | A |
| TCGA-13-0890 | STAB2      | ENST00000388887 | p.V52D   | c.155T>A  | Verified   | GGA | GTC | AAG | 2 | T | A |
| TCGA-13-1498 | STAR       | ENST00000276449 | p.V28E   | c.83T>A   | Verified   | GCT | GTG | ATG | 2 | T | A |
| TCGA-23-1118 | STARD13    | ENST00000336934 | p.V123E  | c.368T>A  | Verified   | GAT | GTG | AAC | 2 | T | A |
| TCGA-13-1481 | STEAP2     | ENST00000394621 | p.F363I  | c.1087T>A | Verified   | TCC | TTT | GGC | 1 | T | A |
| TCGA-13-0714 | STK32C     | ENST00000298630 | p.Y256N  | c.766T>A  | Unverified | CCG | TAC | ATG | 1 | T | A |
| TCGA-20-1685 | STK33      | ENST00000447869 | p.F323I  | c.967T>A  | Unverified | CCC | TTT | TTG | 1 | T | A |
| TCGA-20-1685 | STK33_ENST | ENST00000447869 | p.F323I  | c.967T>A  | Unverified | CCC | TTT | TTG | 1 | T | A |
| TCGA-29-1777 | SUPT6H     | ENST00000314616 | p.Y693N  | c.2077T>A | Unverified | TTT | TAC | TAC | 1 | T | A |
| TCGA-29-1761 | SVEP1      | ENST00000401783 | p.F2102Y | c.6305T>A | Unverified | AAA | TTT | GCA | 2 | T | A |

|              |            |                 |         |           |            |     |     |     |   |   |   |
|--------------|------------|-----------------|---------|-----------|------------|-----|-----|-----|---|---|---|
| TCGA-20-1687 | SYNE2      | ENST00000358025 | p.L187L | c.561T>A  | Unverified | GCC | CTT | CTT | 3 | T | A |
| TCGA-04-1655 | SYT12      | ENST00000393946 | p.L405M | c.1213T>A | Unverified | ATG | TTG | GCC | 1 | T | A |
| TCGA-09-1665 | SYT7       | ENST00000263846 | p.W384R | c.1150T>A | Verified   | CAC | TGG | AAG | 1 | T | A |
| TCGA-61-1910 | TAS2R42    | ENST00000334266 | p.I56N  | c.167T>A  | Unverified | ACA | ATT | GGA | 2 | T | A |
| TCGA-23-1124 | TAS2R8     | ENST00000240615 | p.L146H | c.437T>A  | Verified   | AGC | CTT | ATA | 2 | T | A |
| TCGA-29-1769 | TCEA1_ENST | ENST00000521604 | p.L28Q  | c.83T>A   | Unverified | TTG | CTA | AAG | 2 | T | A |
| TCGA-13-0913 | THBS1      | ENST00000260356 | p.P315P | c.945T>A  | Verified   | cgg | cct | ccc | 3 | T | A |
| TCGA-13-1499 | THRAP3     | ENST00000354618 | p.G735G | c.2205T>A | Verified   | CGA | GGT | AAA | 3 | T | A |
| TCGA-61-1910 | THSD1      | ENST00000258613 | p.I494N | c.1481T>A | Unverified | GGC | ATC | CCT | 2 | T | A |
| TCGA-13-0793 | THSD1      | ENST00000258613 | p.G199G | c.597T>A  | Verified   | CAA | GGT | CAG | 3 | T | A |
| TCGA-13-0900 | TIMD4      | ENST00000274532 | p.C111S | c.331T>A  | Verified   | TAC | TGC | TGC | 1 | T | A |
| TCGA-23-1110 | TMC7       | ENST00000304381 | p.W487R | c.1459T>A | Verified   | TGC | TGG | GAG | 1 | T | A |
| TCGA-13-0760 | TMEM108    | ENST00000321871 | p.L430H | c.1289T>A | Verified   | TTC | CTC | AAC | 2 | T | A |
| TCGA-25-1318 | TMEM180    | ENST00000238936 | p.F435Y | c.1304T>A | Unverified | CTC | TTC | CAG | 2 | T | A |
| TCGA-25-1318 | TMEM180    | ENST00000238936 | p.F435Y | c.1304T>A | Unverified | CTC | TTC | CAG | 2 | T | A |
| TCGA-13-0885 | TMEM209    | ENST00000397622 | p.S425T | c.1273T>A | Verified   | AGC | TCA | TTT | 1 | T | A |
| TCGA-13-0906 | TMEM48     | ENST00000371429 | p.V455E | c.1364T>A | Verified   | AGT | GTA | ATG | 2 | T | A |
| TCGA-61-1915 | TNFRSF8    | ENST00000263932 | p.L52Q  | c.155T>A  | Unverified | GGG | CTG | TTC | 2 | T | A |
| TCGA-25-2398 | TNFRSF9    | ENST00000377507 | p.V9E   | c.26T>A   | Verified   | ata | gta | gcc | 2 | T | A |
| TCGA-24-1844 | TP53       | ENST00000269305 | p.C176S | c.526T>A  | Unverified | CGC | TGC | CCC | 1 | T | A |
| TCGA-09-2050 | TP53       | ENST00000269305 | p.L257Q | c.770T>A  | Verified   | ACA | CTG | GAA | 2 | T | A |
| TCGA-13-1501 | TP53       | ENST00000269305 | p.L145Q | c.434T>A  | Verified   | CAG | CTG | TGG | 2 | T | A |
| TCGA-13-1501 | TP53       | ENST00000269305 | p.L145Q | c.434T>A  | Verified   | CAG | CTG | TGG | 2 | T | A |
| TCGA-24-1463 | TP53       | ENST00000269305 | p.V274D | c.821T>A  | Verified   | CGT | GTT | TGT | 2 | T | A |
| TCGA-04-1347 | TP53       | ENST00000269305 | p.S215R | c.645T>A  | Verified   | CAT | AGT | GTG | 3 | T | A |
| TCGA-24-1844 | TP53_ENSTC | ENST00000269305 | p.C176S | c.526T>A  | Unverified | CGC | TGC | CCC | 1 | T | A |
| TCGA-24-1844 | TP53_ENSTC | ENST00000413465 | p.C176S | c.526T>A  | Unverified | CGC | TGC | CCC | 1 | T | A |
| TCGA-24-1844 | TP53_ENSTC | ENST00000414315 | p.C44S  | c.130T>A  | Unverified | CGC | TGC | CCC | 1 | T | A |
| TCGA-24-1844 | TP53_ENSTC | ENST00000545858 | p.C83S  | c.247T>A  | Unverified | CGC | TGC | CCC | 1 | T | A |
| TCGA-24-1469 | TPD52L2    | ENST00000217121 | p.S110S | c.330T>A  | Verified   | ACT | TCT | GAG | 3 | T | A |
| TCGA-24-1843 | TRHDE      | ENST00000261180 | p.L727Q | c.2180T>A | Unverified | AGC | CTA | GCC | 2 | T | A |
| TCGA-13-0923 | TRIM29     | ENST00000341846 | p.S388T | c.1162T>A | Verified   | TAC | TCT | CTC | 1 | T | A |
| TCGA-29-1761 | TRPC1      | ENST00000273482 | p.Y476N | c.1426T>A | Unverified | AGT | TAT | CTT | 1 | T | A |
| TCGA-61-1998 | TTC7B      | ENST00000328459 | p.T605T | c.1815T>A | Verified   | CTG | ACT | TGT | 3 | T | A |

|              |                     |                 |           |            |            |     |     |     |   |   |   |
|--------------|---------------------|-----------------|-----------|------------|------------|-----|-----|-----|---|---|---|
| TCGA-23-2077 | TTLL5               | ENST00000298832 | p.P487P   | c.1461T>A  | Verified   | TTT | CCT | ACA | 3 | T | A |
| TCGA-13-1505 | TTN                 | NM_003319       | p.S11069T | c.33205T>A | Verified   | tca | tca | gta | 1 | T | A |
| TCGA-13-0760 | TTN                 | NM_003319       | p.V5150D  | c.15449T>A | Verified   | caa | gtc | aag | 2 | T | A |
| TCGA-29-1699 | TTN                 | NM_003319       | p.I20435N | c.61304T>A | Unverified | ctc | atc | aaa | 2 | T | A |
| TCGA-24-2290 | TTN                 | NM_003319       | p.T3310T  | c.9930T>A  | Verified   | gtc | act | tct | 3 | T | A |
| TCGA-24-2290 | TTN                 | NM_003319       | p.T3310T  | c.9930T>A  | Verified   | gtc | act | tct | 3 | T | A |
| TCGA-61-1910 | TTN                 | NM_003319       | p.P25577P | c.76731T>A | Unverified | tct | cct | gat | 3 | T | A |
| TCGA-29-1699 | TTN_ENST00000342175 | ENST00000342175 | p.I20627N | c.61880T>A | Unverified | CTC | ATC | AAA | 2 | T | A |
| TCGA-61-1910 | TTN_ENST00000342175 | ENST00000342175 | p.P25769P | c.77307T>A | Unverified | TCT | CCT | GAT | 3 | T | A |
| TCGA-29-1699 | TTN_ENST00000342992 | ENST00000342992 | p.I26932N | c.80795T>A | Unverified | CTC | ATC | AAA | 2 | T | A |
| TCGA-61-1910 | TTN_ENST00000342992 | ENST00000342992 | p.P32074P | c.96222T>A | Unverified | TCT | CCT | GAT | 3 | T | A |
| TCGA-13-1505 | TTN_ENST00000356127 | ENST00000356127 | p.S17564T | c.52690T>A | Verified   | TCA | TCA | GTA | 1 | T | A |
| TCGA-13-0760 | TTN_ENST00000356127 | ENST00000356127 | p.V11647D | c.34940T>A | Verified   | CAA | GTC | AAG | 2 | T | A |
| TCGA-29-1699 | TTN_ENST00000356127 | ENST00000356127 | p.I26930N | c.80789T>A | Unverified | CTC | ATC | AAA | 2 | T | A |
| TCGA-24-2290 | TTN_ENST00000356127 | ENST00000356127 | p.T3356T  | c.10068T>A | Verified   | GTC | ACT | TCT | 3 | T | A |
| TCGA-24-2290 | TTN_ENST00000356127 | ENST00000356127 | p.T3356T  | c.10068T>A | Verified   | GTC | ACT | TCT | 3 | T | A |
| TCGA-61-1910 | TTN_ENST00000356127 | ENST00000356127 | p.P32072P | c.96216T>A | Unverified | TCT | CCT | GAT | 3 | T | A |
| TCGA-29-1699 | TTN_ENST00000359218 | ENST00000359218 | p.I20560N | c.61679T>A | Unverified | CTC | ATC | AAA | 2 | T | A |
| TCGA-61-1910 | TTN_ENST00000359218 | ENST00000359218 | p.P25702P | c.77106T>A | Unverified | TCT | CCT | GAT | 3 | T | A |
| TCGA-24-2290 | TTN_ENST00000360870 | ENST00000360870 | p.T3356T  | c.10068T>A | Verified   | GTC | ACT | TCT | 3 | T | A |
| TCGA-24-2290 | TTN_ENST00000360870 | ENST00000360870 | p.T3356T  | c.10068T>A | Verified   | GTC | ACT | TCT | 3 | T | A |
| TCGA-25-1313 | TTN_ENST00000360870 | ENST00000360870 | p.V4863V  | c.14589T>A | Verified   | GAA | GTT | CAA | 3 | T | A |
| TCGA-29-1690 | TUBB                | ENST00000327892 | p.T149T   | c.447T>A   | Unverified | GGC | ACT | CTC | 3 | T | A |
| TCGA-09-2050 | TUBB2C              | ENST00000340384 | p.F408I   | c.1222T>A  | Verified   | GAG | TTC | ACC | 1 | T | A |
| TCGA-29-1768 | TXLNB               | ENST00000358430 | p.D99E    | c.297T>A   | Unverified | GAG | GAT | GGG | 3 | T | A |
| TCGA-13-0906 | TYK2                | ENST00000525621 | p.V298E   | c.893T>A   | Unverified | GGG | GTG | GCC | 2 | T | A |
| TCGA-25-2400 | UBA7                | ENST00000333486 | p.V35D    | c.104T>A   | Unverified | agg | gtc | ctg | 2 | T | A |
| TCGA-04-1336 | UHRF1BP1            | ENST00000192788 | p.V654D   | c.1961T>A  | Verified   | AAG | GTT | CCA | 2 | T | A |
| TCGA-23-2077 | UNC13A              | ENST00000428389 | p.V116E   | c.347T>A   | Verified   | AAA | GTG | CAG | 2 | T | A |
| TCGA-23-1114 | UNC80               | ENST00000281753 | p.L187H   | c.560T>A   | Unverified | GAG | CTC | TTC | 2 | T | A |
| TCGA-23-1114 | UNC80_ENS           | ENST00000439458 | p.L187H   | c.560T>A   | Unverified | GAG | CTC | TTC | 2 | T | A |
| TCGA-13-0920 | USH2A               | ENST00000307340 | p.C3359*  | c.10077T>A | Verified   | TGC | TGT | GAG | 3 | T | A |
| TCGA-13-1501 | USP24               | XM_371254.3     | p.S1211T  | c.3631T>A  | Verified   | tca | tcc | tac | 1 | T | A |
| TCGA-13-1501 | USP24               | XM_371254.3     | p.S1211T  | c.3631T>A  | Verified   | tca | tcc | tac | 1 | T | A |

|              |            |                 |          |            |            |     |     |     |   |   |   |
|--------------|------------|-----------------|----------|------------|------------|-----|-----|-----|---|---|---|
| TCGA-23-1123 | VCAN       | ENST00000265077 | p.L1799I | c.5395T>A  | Verified   | ACA | TTA | GAA | 1 | T | A |
| TCGA-23-1123 | VCAN       | ENST00000265077 | p.L1799I | c.5395T>A  | Verified   | ACA | TTA | GAA | 1 | T | A |
| TCGA-13-0885 | VPS13B     | ENST00000358544 | p.S1189S | c.3567T>A  | Verified   | acg | tct | caa | 3 | T | A |
| TCGA-24-1474 | VPS13D     | ENST00000358136 | p.V732V  | c.2196T>A  | Verified   | TTA | GTT | GTC | 3 | T | A |
| TCGA-24-1847 | VWF        | ENST00000261405 | p.C1927S | c.5779T>A  | Unverified | TCG | TGC | CCT | 1 | T | A |
| TCGA-29-1785 | WDR20      | ENST00000335263 | p.L146Q  | c.437T>A   | Unverified | AGA | CTA | ATA | 2 | T | A |
| TCGA-29-1785 | WDR20      | ENST00000335263 | p.L146Q  | c.437T>A   | Unverified | AGA | CTA | ATA | 2 | T | A |
| TCGA-24-2035 | WDR78      | ENST00000371026 | p.W19R   | c.55T>A    | Unverified | GCT | TGG | GGG | 1 | T | A |
| TCGA-29-1711 | WDYHV1     | ENST00000287387 | p.I32I   | c.96T>A    | Unverified | AAT | ATT | TGG | 3 | T | A |
| TCGA-29-1711 | WDYHV1     | ENST00000287387 | p.I32I   | c.96T>A    | Unverified | AAT | ATT | TGG | 3 | T | A |
| TCGA-29-1768 | WHSC2      | ENST00000333877 | p.V451D  | c.1352T>A  | Unverified | AAA | GTC | ACG | 2 | T | A |
| TCGA-23-1022 | WNT2       | ENST00000265441 | p.A256A  | c.768T>A   | Verified   | GTG | GCT | AAC | 3 | T | A |
| TCGA-13-1481 | YAP1       | ENST00000526343 | p.L450I  | c.1348T>A  | Verified   | TGG | TTA | TAG | 1 | T | A |
| TCGA-29-1784 | YSK4       | AK131216.1      | p.S45T   | c.133T>A   | Unverified | cca | tca | ggc | 1 | T | A |
| TCGA-25-1326 | YSK4       | AK131216.1      | p.C533*  | c.1599T>A  | Verified   | aac | tgt | gtg | 3 | T | A |
| TCGA-29-1784 | YSK4_ENST0 | ENST00000375845 | p.S693T  | c.2077T>A  | Unverified | CCA | TCA | GGC | 1 | T | A |
| TCGA-25-1326 | YSK4_ENST0 | ENST00000375845 | p.C1181* | c.3543T>A  | Verified   | AAC | TGT | GTG | 3 | T | A |
| TCGA-13-0714 | ZBTB40     | ENST00000404138 | p.V766E  | c.2297T>A  | Verified   | CAG | GTG | CAG | 2 | T | A |
| TCGA-04-1336 | ZFH3       | ENST00000268489 | p.S3432T | c.10294T>A | Verified   | GTG | TCC | CCC | 1 | T | A |
| TCGA-04-1336 | ZFH4       | ENST00000521891 | p.N1528K | c.4584T>A  | Verified   | CCC | AAT | TTT | 3 | T | A |
| TCGA-61-1900 | ZFP57      | ENST00000376883 | p.T116T  | c.348T>A   | Unverified | GGG | ACT | AGT | 3 | T | A |
| TCGA-29-1777 | ZFPM2      | ENST00000407775 | p.C770*  | c.2310T>A  | Unverified | CCT | TGT | ACC | 3 | T | A |
| TCGA-61-1906 | ZFYVE9     | ENST00000287727 | p.Y957*  | c.2871T>A  | Unverified | aat | tat | gtg | 3 | T | A |
| TCGA-61-1906 | ZFYVE9     | ENST00000287727 | p.Y957*  | c.2871T>A  | Unverified | aat | tat | gtg | 3 | T | A |
| TCGA-13-1408 | ZMIZ2      | ENST00000309315 | p.C639*  | c.1917T>A  | Unverified | AGG | TGT | CCT | 3 | T | A |
| TCGA-25-2391 | ZNF14      | ENST00000344099 | p.F531L  | c.1593T>A  | Unverified | CCT | TTT | GAG | 3 | T | A |
| TCGA-23-1110 | ZNF235     | ENST00000291182 | p.L558H  | c.1673T>A  | Verified   | AAT | CTT | CAC | 2 | T | A |
| TCGA-13-0923 | ZNF354B    | ENST00000322434 | p.I538K  | c.1613T>A  | Verified   | CTT | ATA | CAA | 2 | T | A |
| TCGA-29-1762 | ZNF418     | ENST00000396147 | p.S159S  | c.477T>A   | Unverified | TCA | TCT | ATC | 3 | T | A |
| TCGA-13-0916 | ZNF432_ENS | ENST00000354939 | p.F656I  | c.1966T>A  | Verified   | CGA | TTT | CAC | 1 | T | A |
| TCGA-24-1103 | ZNF491     | ENST00000323169 | p.F135I  | c.403T>A   | Verified   | AAG | TTT | TGT | 1 | T | A |
| TCGA-13-0887 | ZNF521     | NM_015461.1     | p.L575L  | c.1725T>A  | Verified   | ggt | ctt | aaa | 3 | T | A |
| TCGA-24-1417 | ZNF536     | ENST00000355537 | p.F607I  | c.1819T>A  | Verified   | GAT | TTT | TTG | 1 | T | A |
| TCGA-13-0893 | ZNF549     | ENST00000240719 | p.V320E  | c.959T>A   | Verified   | TAT | GTG | TGC | 2 | T | A |

|              |               |                 |          |           |            |     |     |     |   |   |   |
|--------------|---------------|-----------------|----------|-----------|------------|-----|-----|-----|---|---|---|
| TCGA-13-0916 | ZNF615        | ENST00000376716 | p.F645I  | c.1933T>A | Verified   | CGA | TTT | CAC | 1 | T | A |
| TCGA-29-1693 | ZNF638        | ENST00000264447 | p.I423K  | c.1268T>A | Unverified | AGA | ATA | TTT | 2 | T | A |
| TCGA-61-2008 | ZNF652        | ENST00000362063 | p.S216R  | c.648T>A  | Verified   | AAG | AGT | GTA | 3 | T | A |
| TCGA-29-1691 | ZNF766        | ENST00000439461 | p.P28P   | c.84T>A   | Unverified | GAC | CCT | GTG | 3 | T | A |
| TCGA-13-0887 | ZNF804A       | ENST00000302277 | p.T177T  | c.531T>A  | Verified   | AAT | ACT | AAA | 3 | T | A |
| TCGA-23-1122 | ZNF804B       | ENST00000333190 | p.D385E  | c.1155T>A | Verified   | CTG | GAT | GAG | 3 | T | A |
| TCGA-10-0930 | ZNF833P       | ENST00000344893 | p.S167R  | c.501T>A  | Verified   | CAT | AGT | CAT | 3 | T | A |
| TCGA-10-0930 | ZNF833P       | ENST00000344893 | p.S167R  | c.501T>A  | Verified   | CAT | AGT | CAT | 3 | T | A |
| TCGA-23-1022 | ZNF90         | ENST00000300996 | p.T64T   | c.192T>A  | Verified   | TTC | ACT | GTG | 3 | T | A |
| TCGA-23-1022 | ZNF90_ENST    | ENST00000418063 | p.T64T   | c.192T>A  | Verified   | TTC | ACT | GTG | 3 | T | A |
| TCGA-13-0887 | ZSCAN21       | ENST00000292450 | p.D198E  | c.594T>A  | Verified   | CGA | GAT | TGC | 3 | T | A |
| TCGA-23-1118 | ZSWIM3        | ENST00000255152 | p.L91Q   | c.272T>A  | Verified   | AGA | CTA | TTT | 2 | T | A |
| TCGA-24-1844 | A2ML1         | ENST00000299698 | p.V1394A | c.4181T>C | Unverified | AAG | GTT | GAA | 2 | T | C |
| TCGA-13-1509 | AASDH         | ENST00000205214 | p.I1079T | c.3236T>C | Verified   | CTC | ATT | ATT | 2 | T | C |
| TCGA-13-1501 | ABCA12        | ENST00000272895 | p.F1623L | c.4867T>C | Verified   | CCA | TTC | AGC | 1 | T | C |
| TCGA-13-1501 | ABCA12        | ENST00000272895 | p.F1623L | c.4867T>C | Verified   | CCA | TTC | AGC | 1 | T | C |
| TCGA-04-1347 | ABCA12        | ENST00000272895 | p.I1732T | c.5195T>C | Verified   | GCT | ATA | CTC | 2 | T | C |
| TCGA-25-2400 | ABCA12        | ENST00000272895 | p.M1281T | c.3842T>C | Unverified | GGT | ATG | GCA | 2 | T | C |
| TCGA-13-0714 | ABCA3         | ENST00000301732 | p.I888T  | c.2663T>C | Verified   | CTC | ATC | GAG | 2 | T | C |
| TCGA-23-1022 | ABP1          | ENST00000360937 | p.I660T  | c.1979T>C | Verified   | AAC | ATT | GAA | 2 | T | C |
| TCGA-24-1563 | AC013469_ξ    | ENST00000408934 | p.H51H   | c.153T>C  | Unverified | CTT | CAT | CCA | 3 | T | C |
| TCGA-09-2044 | ACAT1         | ENST00000265838 | p.F261F  | c.783T>C  | Verified   | GAT | TTT | AGC | 3 | T | C |
| TCGA-13-0884 | ACP2          | ENST00000256997 | p.W204R  | c.610T>C  | Verified   | GTC | TGG | AAT | 1 | T | C |
| TCGA-61-2012 | ACSL3         | ENST00000357430 | p.V658A  | c.1973T>C | Verified   | GAG | GTA | CTT | 2 | T | C |
| TCGA-13-0884 | ACSM5         | ENST00000331849 | p.V497A  | c.1490T>C | Verified   | GCT | GTC | CTG | 2 | T | C |
| TCGA-29-1775 | ACTB          | ENST00000331789 | p.Y166H  | c.496T>C  | Unverified | atc | tac | gag | 1 | T | C |
| TCGA-25-2042 | ADAM18        | ENST00000265707 | p.D330D  | c.990T>C  | Verified   | TAT | GAT | GAC | 3 | T | C |
| TCGA-23-1122 | ADAM22        | ENST00000265727 | p.I378T  | c.1133T>C | Verified   | AAT | ATT | GGT | 2 | T | C |
| TCGA-25-1313 | ADAM22        | ENST00000265727 | p.V327V  | c.981T>C  | Verified   | GCA | GTT | CAC | 3 | T | C |
| TCGA-23-1122 | ADAM22_EI     | ENST00000398209 | p.I378T  | c.1133T>C | Verified   | AAT | ATT | GGT | 2 | T | C |
| TCGA-25-1313 | ADAM22_EI     | ENST00000398209 | p.V327V  | c.981T>C  | Verified   | GCA | GTT | CAC | 3 | T | C |
| TCGA-61-1900 | ADAM7         | ENST00000175238 | p.F395L  | c.1183T>C | Unverified | CCA | TTT | CCT | 1 | T | C |
| TCGA-24-1463 | ADAMTS16      | NM_139056.1     | p.C274R  | c.820T>C  | Unverified | tct | tgc | tta | 1 | T | C |
| TCGA-24-1463 | ADAMTS16_ENST | ENST00000274181 | p.C274R  | c.820T>C  | Unverified | TCT | TGC | TTA | 1 | T | C |



|              |          |                 |          |            |            |     |     |     |   |   |   |
|--------------|----------|-----------------|----------|------------|------------|-----|-----|-----|---|---|---|
| TCGA-04-1336 | ADAMTS20 | ENST00000389420 | p.T607T  | c.1821T>C  | Verified   | AAT | ACT | GAT | 3 | T | C |
| TCGA-61-1915 | ADCY6    | ENST00000307885 | p.M820T  | c.2459T>C  | Unverified | AAC | ATG | CTG | 2 | T | C |
| TCGA-13-0923 | ADNP     | ENST00000349014 | p.F38F   | c.114T>C   | Verified   | GAT | TTT | AAA | 3 | T | C |
| TCGA-25-1326 | ADNP2    | ENST00000262198 | p.I1102T | c.3305T>C  | Verified   | GCA | ATA | AAA | 2 | T | C |
| TCGA-23-1122 | ADSL     | ENST00000216194 | p.I106T  | c.317T>C   | Verified   | ATT | ATT | CAC | 2 | T | C |
| TCGA-24-1417 | AFF2     | ENST00000370460 | p.L1050L | c.3150T>C  | Unverified | CCC | CTT | CTA | 3 | T | C |
| TCGA-61-1740 | AFF3     | ENST00000356421 | p.Y45H   | c.133T>C   | Unverified | GTC | TAT | GAA | 1 | T | C |
| TCGA-29-1691 | AGBL5    | ENST00000360131 | p.Y861H  | c.2581T>C  | Unverified | TGT | TAC | AGC | 1 | T | C |
| TCGA-24-0975 | AHI1     | ENST00000367800 | p.L71P   | c.212T>C   | Verified   | aat | ctt | ccc | 2 | T | C |
| TCGA-61-2012 | AHNAK    | ENST00000378024 | p.I5712T | c.17135T>C | Verified   | AAG | ATC | AAA | 2 | T | C |
| TCGA-13-1510 | AICDA    | ENST00000229335 | p.Y144H  | c.430T>C   | Unverified | GAT | TAT | TTT | 1 | T | C |
| TCGA-09-1674 | ALG10    | ENST00000266483 | p.L220P  | c.659T>C   | Unverified | AGA | CTT | CCA | 2 | T | C |
| TCGA-20-1683 | ALK      | ENST00000389048 | p.S342S  | c.1026T>C  | Unverified | agc | agt | gag | 3 | T | C |
| TCGA-24-1469 | ALS2CR8  | ENST00000320443 | p.N56N   | c.168T>C   | Verified   | AAT | AAT | TCA | 3 | T | C |
| TCGA-04-1347 | AMPD1    | NM_000036.1     | p.I506T  | c.1517T>C  | Verified   | cat | atc | act | 2 | T | C |
| TCGA-13-1498 | AMPH     | ENST00000356264 | p.D639D  | c.1917T>C  | Verified   | TCT | GAT | GAA | 3 | T | C |
| TCGA-30-1857 | ANGEL1   | ENST00000251089 | p.C611R  | c.1831T>C  | Unverified | TCC | TGT | GAG | 1 | T | C |
| TCGA-04-1638 | ANK2     | ENST00000357077 | p.L1121P | c.3362T>C  | Unverified | ATT | CTT | AAC | 2 | T | C |
| TCGA-13-1510 | ANKRD12  | ENST00000262126 | p.I1120T | c.3359T>C  | Unverified | AAA | ATA | AAA | 2 | T | C |
| TCGA-04-1342 | ANKRD32  | ENST00000255667 | p.M419T  | c.1256T>C  | Verified   | GTC | ATG | GAG | 2 | T | C |
| TCGA-29-1783 | ANUBL1   | ENST00000344646 | p.N217N  | c.651T>C   | Unverified | GAA | AAT | TCA | 3 | T | C |
| TCGA-29-1761 | AP4B1    | ENST00000369569 | p.L499S  | c.1496T>C  | Unverified | TTG | TTG | TAT | 2 | T | C |
| TCGA-29-1761 | APBB1IP  | ENST00000376236 | p.M290T  | c.869T>C   | Unverified | aaa | atg | aat | 2 | T | C |
| TCGA-13-0793 | APC      | ENST00000457016 | p.L852S  | c.2555T>C  | Unverified | AGT | TTG | GAG | 2 | T | C |
| TCGA-29-1777 | APC      | ENST00000457016 | p.I858I  | c.2574T>C  | Unverified | GGA | ATT | GGT | 3 | T | C |
| TCGA-13-1497 | APOB     | ENST00000233242 | p.T151T  | c.453T>C   | Verified   | CCT | ACT | TAC | 3 | T | C |
| TCGA-20-0991 | APOD     | ENST00000343267 | p.I172T  | c.515T>C   | Verified   | AAC | ATT | GAT | 2 | T | C |
| TCGA-24-1843 | ARHGAP36 | NM_144967.2     | p.S304P  | c.910T>C   | Unverified | gat | tct | ctg | 1 | T | C |
| TCGA-30-1857 | ARNT2    | ENST00000303329 | p.D147D  | c.441T>C   | Unverified | GCT | GAT | GGA | 3 | T | C |
| TCGA-29-1769 | ARRB2    | ENST00000269260 | p.V336A  | c.1007T>C  | Unverified | GAT | GTC | TCT | 2 | T | C |
| TCGA-25-1326 | ASH1L    | ENST00000392403 | p.F1227S | c.3680T>C  | Verified   | TCT | TTT | GAG | 2 | T | C |
| TCGA-23-1120 | ASPH     | ENST00000379454 | p.I294T  | c.881T>C   | Verified   | GTA | ATT | GTA | 2 | T | C |
| TCGA-24-1469 | ATF6     | ENST00000367942 | p.I471T  | c.1412T>C  | Unverified | CTA | ATT | AAC | 2 | T | C |
| TCGA-20-1683 | ATL1     | ENST00000358385 | p.F293L  | c.877T>C   | Unverified | GAA | TTC | ATC | 1 | T | C |

|              |             |                 |         |           |            |     |     |     |   |   |   |
|--------------|-------------|-----------------|---------|-----------|------------|-----|-----|-----|---|---|---|
| TCGA-04-1338 | ATP1A2      | ENST00000361216 | p.V652A | c.1955T>C | Verified   | CAA | GTC | AAC | 2 | T | C |
| TCGA-13-0755 | ATP2A2      | ENST00000539276 | p.S72S  | c.216T>C  | Verified   | ATA | TCT | TTT | 3 | T | C |
| TCGA-24-1846 | ATP2C1      | ENST00000359644 | p.N841N | c.2523T>C | Unverified | AGT | AAT | AGA | 3 | T | C |
| TCGA-23-1122 | ATP6AP1     | ENST00000369762 | p.L437P | c.1310T>C | Unverified | ATG | CTC | TTC | 2 | T | C |
| TCGA-29-1781 | ATP6V1C2    | ENST00000381661 | p.L181P | c.542T>C  | Unverified | TAT | CTC | GTC | 2 | T | C |
| TCGA-29-1781 | ATP6V1C2_f  | ENST00000272238 | p.L181P | c.542T>C  | Unverified | TAT | CTC | GTC | 2 | T | C |
| TCGA-24-0979 | ATP8B2      | ENST00000368489 | p.L590P | c.1769T>C | Verified   | CGA | CTC | TAC | 2 | T | C |
| TCGA-24-1844 | ATP8B2      | ENST00000368489 | p.I323T | c.968T>C  | Unverified | GTG | ATC | CTG | 2 | T | C |
| TCGA-24-1844 | ATP8B2_ENS  | ENST00000368487 | p.I290T | c.869T>C  | Unverified | GTG | ATC | CTG | 2 | T | C |
| TCGA-61-1906 | ATP8B4      | ENST00000284509 | p.W328R | c.982T>C  | Unverified | TTC | TGG | TCA | 1 | T | C |
| TCGA-61-1906 | ATP8B4      | ENST00000284509 | p.W328R | c.982T>C  | Unverified | TTC | TGG | TCA | 1 | T | C |
| TCGA-13-1497 | ATRNL1      | ENST00000355044 | p.S226S | c.678T>C  | Verified   | GTC | TCT | GTT | 3 | T | C |
| TCGA-13-0906 | B4GALNT4    | ENST00000329962 | p.S894P | c.2680T>C | Unverified | CGC | TCC | GCC | 1 | T | C |
| TCGA-04-1342 | BACE1       | ENST00000313005 | p.F60L  | c.178T>C  | Unverified | AGC | TTT | GTG | 1 | T | C |
| TCGA-13-1507 | BACH2       | ENST00000257749 | p.C830C | c.2490T>C | Verified   | AAG | TGT | ACA | 3 | T | C |
| TCGA-13-0807 | BAI3        | ENST00000370598 | p.I805T | c.2414T>C | Verified   | GAG | ATA | GAA | 2 | T | C |
| TCGA-13-0793 | BAZ1A       | ENST00000382422 | p.F442S | c.1325T>C | Unverified | ctt | ttt | gat | 2 | T | C |
| TCGA-24-2289 | BBX         | ENST00000415149 | p.I438T | c.1313T>C | Unverified | ATC | ATT | GAG | 2 | T | C |
| TCGA-13-0893 | BCAS1       | ENST00000395961 | p.A279A | c.837T>C  | Verified   | GCA | GCT | ATA | 3 | T | C |
| TCGA-23-1114 | BCAS3       | ENST00000390652 | p.Y504H | c.1510T>C | Unverified | TCC | TAT | AAC | 1 | T | C |
| TCGA-24-1470 | BCHE        | ENST00000264381 | p.F472L | c.1414T>C | Verified   | gaa | ttt | gtc | 1 | T | C |
| TCGA-29-1769 | BCLAF1_ENS  | ENST00000531224 | p.F509L | c.1525T>C | Unverified | CTC | TTT | GAT | 1 | T | C |
| TCGA-13-1510 | BDKRB1      | ENST00000216629 | p.F49S  | c.146T>C  | Unverified | TGT | TTC | TTC | 2 | T | C |
| TCGA-13-0906 | BMP2K_ENS   | ENST00000335016 | p.D359D | c.1077T>C | Verified   | ACA | GAT | ACC | 3 | T | C |
| TCGA-25-1318 | BOD1L       | ENST00000040738 | p.S484S | c.1452T>C | Verified   | GAT | TCT | GAT | 3 | T | C |
| TCGA-25-1318 | BOD1L       | ENST00000040738 | p.S484S | c.1452T>C | Verified   | GAT | TCT | GAT | 3 | T | C |
| TCGA-23-2078 | BOK         | ENST00000318407 | p.L92P  | c.275T>C  | Verified   | cag | ctg | cac | 2 | T | C |
| TCGA-24-1104 | BOLL        | ENST00000392296 | p.L18S  | c.53T>C   | Verified   | CCT | TTG | AAT | 2 | T | C |
| TCGA-13-0760 | BPI         | ENST00000262865 | p.L287P | c.860T>C  | Verified   | TAC | CTG | GGC | 2 | T | C |
| TCGA-29-1693 | C10orf12    | ENST00000286067 | p.D70D  | c.210T>C  | Unverified | CAG | GAT | TTA | 3 | T | C |
| TCGA-29-1763 | C10orf129   | ENST00000327739 | p.L119S | c.356T>C  | Unverified | TCT | TTA | TCC | 2 | T | C |
| TCGA-29-1763 | C10orf129_f | ENST00000341686 | p.L274S | c.821T>C  | Unverified | TCT | TTA | TCC | 2 | T | C |
| TCGA-13-0890 | C11orf30    | ENST00000334736 | p.F263L | c.787T>C  | Verified   | ACC | TTC | ACT | 1 | T | C |
| TCGA-24-1464 | C11orf40    | ENST00000307616 | p.N52N  | c.156T>C  | Verified   | AAA | AAT | ATC | 3 | T | C |

|              |            |                 |         |           |            |     |     |     |   |   |   |
|--------------|------------|-----------------|---------|-----------|------------|-----|-----|-----|---|---|---|
| TCGA-13-1510 | C11orf80   | ENST00000360962 | p.H383H | c.1149T>C | Unverified | TAC | CAT | TTG | 3 | T | C |
| TCGA-61-2109 | C17orf104  | ENST00000409122 | p.P720P | c.2160T>C | Unverified | TAC | CCT | TAT | 3 | T | C |
| TCGA-61-2095 | C19orf57   | ENST00000346736 | p.L147P | c.440T>C  | Unverified | CTG | CTA | GTG | 2 | T | C |
| TCGA-23-2077 | C20orf185  | ENST00000375494 | p.A62A  | c.186T>C  | Verified   | ACA | GCT | GTG | 3 | T | C |
| TCGA-29-1776 | C21orf70   | ENST00000291634 | p.F47L  | c.139T>C  | Unverified | GCG | TTC | ATC | 1 | T | C |
| TCGA-24-0979 | C2CD3      | ENST00000313663 | p.V431A | c.1292T>C | Verified   | GAT | GTG | TAT | 2 | T | C |
| TCGA-24-2280 | C2orf56    | ENST00000002125 | p.I282T | c.845T>C  | Unverified | ATC | ATC | GAG | 2 | T | C |
| TCGA-61-1737 | C2orf71    | ENST00000331664 | p.C75C  | c.225T>C  | Unverified | CTT | TGT | CAG | 3 | T | C |
| TCGA-13-0760 | C3orf28    | ENST00000477892 | p.D81D  | c.243T>C  | Verified   | GAA | GAT | GAA | 3 | T | C |
| TCGA-04-1338 | C3orf30    | ENST00000295622 | p.F432S | c.1295T>C | Verified   | AAC | TTC | CAA | 2 | T | C |
| TCGA-29-1785 | C5orf48    | ENST00000357147 | p.L89L  | c.267T>C  | Unverified | AGG | CTT | TGC | 3 | T | C |
| TCGA-29-1785 | C5orf48    | ENST00000357147 | p.L89L  | c.267T>C  | Unverified | AGG | CTT | TGC | 3 | T | C |
| TCGA-23-1122 | C6orf70    | ENST00000366773 | p.M353T | c.1058T>C | Verified   | GCT | ATG | GAA | 2 | T | C |
| TCGA-13-1496 | C7orf16    | ENST00000342032 | p.F81F  | c.243T>C  | Verified   | GTG | TTT | TCA | 3 | T | C |
| TCGA-20-1686 | C7orf31    | ENST00000283905 | p.H390H | c.1170T>C | Unverified | ACC | CAT | AAA | 3 | T | C |
| TCGA-23-1022 | C7orf62    | ENST00000297203 | p.Y114Y | c.342T>C  | Verified   | GAT | TAT | ATT | 3 | T | C |
| TCGA-13-0920 | C8orf34_EN | ENST00000518698 | p.L25L  | c.73T>C   | Verified   | GAA | TTA | ATG | 1 | T | C |
| TCGA-09-1665 | C9orf3     | ENST00000297979 | p.L143S | c.428T>C  | Verified   | TTT | TTG | CTA | 2 | T | C |
| TCGA-04-1542 | CCDC36     | ENST00000296449 | p.N579N | c.1737T>C | Verified   | AAG | AAT | TTG | 3 | T | C |
| TCGA-61-1895 | CCDC53     | ENST00000240079 | p.S115P | c.343T>C  | Unverified | GAC | TCT | GGA | 1 | T | C |
| TCGA-04-1367 | CCDC6      | ENST00000263102 | p.L217P | c.650T>C  | Verified   | CGC | CTC | TGG | 2 | T | C |
| TCGA-09-2050 | CCDC77     | ENST00000239830 | p.D351D | c.1053T>C | Verified   | AAA | GAT | AAG | 3 | T | C |
| TCGA-13-1481 | CCDC88A    | ENST00000263630 | p.L189P | c.566T>C  | Verified   | CCA | CTC | TTG | 2 | T | C |
| TCGA-24-2289 | CCL27      | ENST00000259631 | p.L10P  | c.29T>C   | Unverified | AGC | CTC | CTG | 2 | T | C |
| TCGA-04-1338 | CCNF_ENST  | ENST00000397066 | p.F326S | c.977T>C  | Verified   | GAC | TTC | ACA | 2 | T | C |
| TCGA-04-1347 | CCPG1      | ENST00000310958 | p.F566S | c.1697T>C | Verified   | GTT | TTT | AGT | 2 | T | C |
| TCGA-29-1761 | CCR10      | ENST00000332438 | p.S15S  | c.45T>C   | Unverified | TAC | TCT | GGG | 3 | T | C |
| TCGA-24-1435 | CCR3       | ENST00000357422 | p.F316S | c.947T>C  | Verified   | ttc | ttc | cac | 2 | T | C |
| TCGA-13-1501 | CD163L1    | ENST00000313599 | p.A123A | c.369T>C  | Verified   | TCA | GCT | CTC | 3 | T | C |
| TCGA-13-1501 | CD163L1    | ENST00000313599 | p.A123A | c.369T>C  | Verified   | TCA | GCT | CTC | 3 | T | C |
| TCGA-13-0887 | CD180      | ENST00000256447 | p.H101H | c.303T>C  | Verified   | CAT | CAT | CAA | 3 | T | C |
| TCGA-29-1691 | CD248      | ENST00000311330 | p.V453A | c.1358T>C | Unverified | GTG | GTC | TCT | 2 | T | C |
| TCGA-04-1337 | CDC2L2     | ENST00000357760 | p.W109R | c.325T>C  | Unverified | AAA | TGG | AAG | 1 | T | C |
| TCGA-29-1696 | CDKL2      | ENST00000429927 | p.V157A | c.470T>C  | Unverified | gag | ggt | tat | 2 | T | C |

|              |           |                   |          |           |            |     |     |     |   |   |   |
|--------------|-----------|-------------------|----------|-----------|------------|-----|-----|-----|---|---|---|
| TCGA-29-1696 | CDKL2     | ENST00000429927   | p.V157A  | c.470T>C  | Unverified | gag | gtt | tat | 2 | T | C |
| TCGA-13-0923 | CEBPE     | ENST00000206513   | p.I267T  | c.800T>C  | Verified   | CAG | ATT | CCT | 2 | T | C |
| TCGA-10-0930 | CELF5     | ENST00000292672   | p.F272L  | c.814T>C  | Verified   | GCC | TTC | TCA | 1 | T | C |
| TCGA-10-0930 | CELF5     | ENST00000292672   | p.F272L  | c.814T>C  | Verified   | GCC | TTC | TCA | 1 | T | C |
| TCGA-29-1703 | CENPE     | ENST00000265148.1 | p.L2462L | c.7384T>C | Unverified | cta | ttg | aga | 1 | T | C |
| TCGA-13-1509 | CENPE     | ENST00000265148.1 | p.F2608S | c.7823T>C | Verified   | ttt | ttt | gat | 2 | T | C |
| TCGA-24-2289 | CENPJ     | ENST00000381884   | p.L575S  | c.1724T>C | Unverified | GAA | TTA | GAT | 2 | T | C |
| TCGA-13-0883 | CEP250    | ENST00000397527   | p.S1187P | c.3559T>C | Verified   | TAC | TCT | GCC | 1 | T | C |
| TCGA-10-0930 | CEP290    | ENST00000552810   | p.L2158S | c.6473T>C | Verified   | ATA | TTG | ACT | 2 | T | C |
| TCGA-10-0930 | CEP290    | ENST00000552810   | p.L2158S | c.6473T>C | Verified   | ATA | TTG | ACT | 2 | T | C |
| TCGA-23-1022 | CEP290    | ENST00000552810   | p.D1972D | c.5916T>C | Verified   | GTT | GAT | CAG | 3 | T | C |
| TCGA-25-2391 | CEPT1     | ENST00000357172   | p.D180D  | c.540T>C  | Unverified | CCT | GAT | TGG | 3 | T | C |
| TCGA-04-1638 | CFH       | ENST00000367429   | p.Y271H  | c.811T>C  | Unverified | cct | tat | att | 1 | T | C |
| TCGA-13-0760 | CGB5      | ENST00000301408   | p.S101P  | c.301T>C  | Unverified | GTC | TCC | TAC | 1 | T | C |
| TCGA-09-1674 | CHD4      | ENST00000357008   | p.D282D  | c.846T>C  | Unverified | CCT | GAT | GCC | 3 | T | C |
| TCGA-09-1674 | CHD4_ENST | ENST00000309577   | p.D282D  | c.846T>C  | Unverified | CCT | GAT | GCC | 3 | T | C |
| TCGA-09-1674 | CHD4_ENST | ENST00000357008   | p.D282D  | c.846T>C  | Unverified | CCT | GAT | GCC | 3 | T | C |
| TCGA-23-1122 | CHRNA10   | ENST00000250699   | p.S360P  | c.1078T>C | Verified   | CAG | TCC | AGG | 1 | T | C |
| TCGA-04-1342 | CHRN1     | ENST00000306071   | p.L10P   | c.29T>C   | Unverified | CTG | CTG | GGG | 2 | T | C |
| TCGA-29-1785 | CLEC4D    | ENST00000299665   | p.P85P   | c.255T>C  | Unverified | TGT | CCT | ATT | 3 | T | C |
| TCGA-29-1785 | CLEC4D    | ENST00000299665   | p.P85P   | c.255T>C  | Unverified | TGT | CCT | ATT | 3 | T | C |
| TCGA-30-1855 | CLIP1     | ENST00000358808   | p.I798I  | c.2394T>C | Unverified | GAG | ATT | GAA | 3 | T | C |
| TCGA-20-1686 | CNGA2     | ENST00000329903   | p.V8A    | c.23T>C   | Unverified | ggt | gtg | aag | 2 | T | C |
| TCGA-13-0760 | CNOT1     | ENST00000317147   | p.L781P  | c.2342T>C | Verified   | GGT | CTT | GGC | 2 | T | C |
| TCGA-61-1910 | CNST      | ENST00000366513   | p.S172P  | c.514T>C  | Unverified | CAG | TCT | CTG | 1 | T | C |
| TCGA-25-1326 | CNTNAP1   | ENST00000264638   | p.F503S  | c.1508T>C | Unverified | GCA | TTC | CAT | 2 | T | C |
| TCGA-29-1775 | CNTNAP2   | ENST00000361727   | p.F366F  | c.1098T>C | Unverified | AGC | TTT | TCT | 3 | T | C |
| TCGA-23-1031 | CNTNAP5   | ENST00000431078   | p.V859A  | c.2576T>C | Verified   | CCT | GTG | GAG | 2 | T | C |
| TCGA-24-1104 | CNTRL     | ENST00000238341   | p.L2042L | c.6124T>C | Verified   | CTG | TTG | GCC | 1 | T | C |
| TCGA-24-2289 | CNTRL     | ENST00000238341   | p.I1663T | c.4988T>C | Unverified | CAG | ATT | AGT | 2 | T | C |
| TCGA-25-2392 | CNTRL     | ENST00000238341   | p.A480A  | c.1440T>C | Verified   | GAA | GCT | ATA | 3 | T | C |
| TCGA-04-1530 | COL14A1   | ENST00000297848   | p.L835S  | c.2504T>C | Unverified | aac | ttg | cgg | 2 | T | C |
| TCGA-24-2035 | COL14A1   | ENST00000297848   | p.V742A  | c.2225T>C | Verified   | cta | gtt | gta | 2 | T | C |
| TCGA-61-2012 | COL18A1   | ENST00000355480   | p.L356P  | c.1067T>C | Unverified | GCC | CTC | TAC | 2 | T | C |

|              |           |                 |          |           |            |     |     |     |   |   |   |
|--------------|-----------|-----------------|----------|-----------|------------|-----|-----|-----|---|---|---|
| TCGA-13-0885 | COL22A1   | ENST00000303045 | p.V721A  | c.2162T>C | Verified   | GGT | GTC | CCA | 2 | T | C |
| TCGA-61-1904 | COL4A2    | ENST00000360467 | p.L27P   | c.80T>C   | Unverified | TTC | CTC | GCC | 2 | T | C |
| TCGA-29-1770 | COX8C     | ENST00000342144 | p.Y61H   | c.181T>C  | Unverified | GCA | TAT | GTG | 1 | T | C |
| TCGA-13-1509 | CP        | ENST00000264613 | p.D103D  | c.309T>C  | Verified   | GGA | GAT | AAA | 3 | T | C |
| TCGA-29-1777 | CTAGE4    | ENST00000486333 | p.D709D  | c.2127T>C | Unverified | GTG | GAT | ACA | 3 | T | C |
| TCGA-23-1031 | CTCF1     | ENST00000243914 | p.I591T  | c.1772T>C | Verified   | acc | atc | ctg | 2 | T | C |
| TCGA-24-1469 | CTNBL1    | ENST00000361383 | p.L444L  | c.1330T>C | Verified   | gag | ttg | cat | 1 | T | C |
| TCGA-13-0913 | CUBN      | ENST00000377833 | p.T517T  | c.1551T>C | Verified   | TTC | ACT | TTT | 3 | T | C |
| TCGA-04-1347 | CXorf67   | NM_203407.1     | p.L469P  | c.1406T>C | Verified   | agc | ctt | agg | 2 | T | C |
| TCGA-29-1698 | CYBR4     | ENST00000369681 | p.Y326H  | c.976T>C  | Unverified | CCA | TAT | ACA | 1 | T | C |
| TCGA-13-0791 | CYP11A1   | ENST00000268053 | p.H266H  | c.798T>C  | Verified   | GAC | CAT | GTG | 3 | T | C |
| TCGA-25-2042 | DCBLD2    | ENST00000326840 | p.F406L  | c.1216T>C | Verified   | ATA | TTT | CAA | 1 | T | C |
| TCGA-04-1356 | DCUN1D3   | ENST00000324344 | p.N116N  | c.348T>C  | Verified   | TGC | AAT | GAC | 3 | T | C |
| TCGA-13-1509 | DDX18     | ENST00000263239 | p.L568S  | c.1703T>C | Verified   | aaa | ttg | att | 2 | T | C |
| TCGA-29-1781 | DDX58     | ENST00000379883 | p.S125P  | c.373T>C  | Unverified | att | tct | gat | 1 | T | C |
| TCGA-23-1122 | DDX59     | ENST00000367349 | p.I381T  | c.1142T>C | Verified   | ACC | ATT | TTG | 2 | T | C |
| TCGA-13-0923 | DDX60     | ENST00000393743 | p.L477L  | c.1429T>C | Verified   | GAT | TTG | CCT | 1 | T | C |
| TCGA-13-0923 | DDX60_ENS | ENST00000393743 | p.L477L  | c.1429T>C | Verified   | GAT | TTG | CCT | 1 | T | C |
| TCGA-13-1499 | DHX29     | ENST00000251636 | p.D432D  | c.1296T>C | Verified   | GAA | GAT | GGC | 3 | T | C |
| TCGA-13-1481 | DIAPH2    | ENST00000324765 | p.L898P  | c.2693T>C | Verified   | gaa | ctg | gaa | 2 | T | C |
| TCGA-24-1422 | DISP2     | ENST00000267889 | p.W946R  | c.2836T>C | Unverified | GGT | TGG | TTC | 1 | T | C |
| TCGA-04-1542 | DLL1      | ENST00000366756 | p.C204C  | c.612T>C  | Verified   | ACC | TGT | GGG | 3 | T | C |
| TCGA-04-1343 | DMXL2     | ENST00000251076 | p.F782S  | c.2345T>C | Verified   | TGC | TTT | GTT | 2 | T | C |
| TCGA-23-1124 | DMXL2     | ENST00000251076 | p.L964P  | c.2891T>C | Verified   | AAT | CTT | CAA | 2 | T | C |
| TCGA-24-2280 | DNAH1_ENS | ENST00000420323 | p.M1986T | c.5957T>C | Unverified | ATG | ATG | TTC | 2 | T | C |
| TCGA-29-1691 | DNAH11    | ENST00000328843 | p.S160P  | c.478T>C  | Unverified | GTA | TCT | GCT | 1 | T | C |
| TCGA-24-2035 | DNAH12L   | ENST00000311202 | p.D80D   | c.240T>C  | Verified   | CCT | GAT | TAT | 3 | T | C |
| TCGA-04-1361 | DNAH3     | ENST00000261383 | p.Y1393Y | c.4179T>C | Verified   | GGC | TAT | GAG | 3 | T | C |
| TCGA-04-1361 | DNAH3     | ENST00000261383 | p.Y1393Y | c.4179T>C | Verified   | GGC | TAT | GAG | 3 | T | C |
| TCGA-13-1510 | DNAH7     | ENST00000312428 | p.Y2073Y | c.6219T>C | Unverified | TGG | TAT | GAT | 3 | T | C |
| TCGA-13-0924 | DNMT3A    | ENST00000321117 | p.F414S  | c.1241T>C | Verified   | ggc | ttc | cag | 2 | T | C |
| TCGA-13-1488 | DOCK5     | ENST00000276440 | p.I81T   | c.242T>C  | Verified   | GTG | ATT | CCT | 2 | T | C |
| TCGA-25-1326 | DOPEY1    | ENST00000349129 | p.Y1335H | c.4003T>C | Verified   | TGG | TAT | AGC | 1 | T | C |
| TCGA-24-2288 | DOPEY1    | ENST00000349129 | p.N1043N | c.3129T>C | Unverified | AGC | AAT | GTG | 3 | T | C |

|              |             |                 |          |            |            |     |     |     |   |   |   |
|--------------|-------------|-----------------|----------|------------|------------|-----|-----|-----|---|---|---|
| TCGA-61-1900 | DPP10       | ENST00000310323 | p.S238P  | c.712T>C   | Unverified | TGG | TCA | CCA | 1 | T | C |
| TCGA-13-0885 | DPP10       | ENST00000310323 | p.M355T  | c.1064T>C  | Verified   | GAG | ATG | ACA | 2 | T | C |
| TCGA-61-1900 | DPP10_ENS   | ENST00000410059 | p.S245P  | c.733T>C   | Unverified | TGG | TCA | CCA | 1 | T | C |
| TCGA-25-2042 | DPP8        | ENST00000300141 | p.L120L  | c.358T>C   | Unverified | CTT | TTG | GAT | 1 | T | C |
| TCGA-09-1665 | DRD1        | ENST00000329144 | p.I438T  | c.1313T>C  | Verified   | CCC | ATC | ACA | 2 | T | C |
| TCGA-29-1770 | DSCAM       | ENST00000400454 | p.S1806S | c.5418T>C  | Unverified | GAA | AGT | GCC | 3 | T | C |
| TCGA-23-1122 | DSCAML1     | ENST00000321322 | p.I388T  | c.1163T>C  | Unverified | GGC | ATT | GGC | 2 | T | C |
| TCGA-25-2392 | DSCAML1     | ENST00000321322 | p.I1244T | c.3731T>C  | Unverified | TAC | ATC | CAG | 2 | T | C |
| TCGA-24-0975 | DSG3        | ENST00000257189 | p.I142T  | c.425T>C   | Unverified | CTT | ATA | CTA | 2 | T | C |
| TCGA-24-2280 | DSP         | ENST00000379802 | p.S989S  | c.2967T>C  | Unverified | CCT | TCT | GGG | 3 | T | C |
| TCGA-24-1563 | DST         | ENST00000370765 | p.I108T  | c.323T>C   | Verified   | TAT | ATA | CTT | 2 | T | C |
| TCGA-30-1714 | DST         | ENST00000370765 | p.I435T  | c.1304T>C  | Unverified | GAG | ATA | GCA | 2 | T | C |
| TCGA-20-1686 | DST_ENST0C  | ENST00000244364 | p.M2592T | c.7775T>C  | Unverified | GAA | ATG | GAC | 2 | T | C |
| TCGA-30-1714 | DST_ENST0C  | ENST00000244364 | p.I435T  | c.1304T>C  | Unverified | GAG | ATA | GCA | 2 | T | C |
| TCGA-24-1563 | DST_ENST0C  | ENST00000370754 | p.I612T  | c.1835T>C  | Verified   | TAT | ATA | CTT | 2 | T | C |
| TCGA-30-1714 | DST_ENST0C  | ENST00000370765 | p.I435T  | c.1304T>C  | Unverified | GAG | ATA | GCA | 2 | T | C |
| TCGA-20-1686 | DST_ENST0C  | ENST00000370769 | p.M5006T | c.15017T>C | Unverified | GAA | ATG | GAC | 2 | T | C |
| TCGA-24-1563 | DST_ENST0C  | ENST00000370769 | p.I434T  | c.1301T>C  | Verified   | TAT | ATA | CTT | 2 | T | C |
| TCGA-30-1714 | DST_ENST0C  | ENST00000370769 | p.I761T  | c.2282T>C  | Unverified | GAG | ATA | GCA | 2 | T | C |
| TCGA-61-1733 | DUSP16      | ENST00000228862 | p.Y558Y  | c.1674T>C  | Unverified | tgg | tat | ttt | 3 | T | C |
| TCGA-61-1733 | DUSP16      | ENST00000228862 | p.Y558Y  | c.1674T>C  | Unverified | tgg | tat | ttt | 3 | T | C |
| TCGA-13-0887 | DUSP19      | ENST00000354221 | p.S178P  | c.532T>C   | Verified   | ttt | tct | ttg | 1 | T | C |
| TCGA-23-1122 | DYNC1H1     | ENST00000360184 | p.Y3841H | c.11521T>C | Verified   | CTA | TAC | GAG | 1 | T | C |
| TCGA-25-2042 | DYNC1H1     | ENST00000360184 | p.Y1172Y | c.3516T>C  | Verified   | ACC | TAT | GTG | 3 | T | C |
| TCGA-29-1784 | E2F5        | ENST00000416274 | p.I303T  | c.908T>C   | Unverified | ATC | ATT | GAT | 2 | T | C |
| TCGA-30-1855 | EDN3        | ENST00000311585 | p.Y127Y  | c.381T>C   | Unverified | CCC | TAT | GGA | 3 | T | C |
| TCGA-30-1855 | EDN3_ENSTI  | ENST00000337938 | p.Y127Y  | c.381T>C   | Unverified | CCC | TAT | GGA | 3 | T | C |
| TCGA-13-1505 | EI24        | ENST00000343678 | p.I105T  | c.314T>C   | Verified   | ATT | ATC | GGT | 2 | T | C |
| TCGA-29-1693 | EIF2A       | ENST00000460851 | p.W390R  | c.1168T>C  | Unverified | ATT | TGG | CAT | 1 | T | C |
| TCGA-29-1693 | EIF2A_ENSTI | ENST00000487799 | p.W365R  | c.1093T>C  | Unverified | ATT | TGG | CAT | 1 | T | C |
| TCGA-23-1122 | EIF2C1      | ENST00000373204 | p.Y418H  | c.1252T>C  | Verified   | cag | tac | ggc | 1 | T | C |
| TCGA-29-1691 | ELL3        | ENST00000319359 | p.V73A   | c.218T>C   | Unverified | ATA | GTG | TCC | 2 | T | C |
| TCGA-61-1907 | ELOVL6      | ENST00000394607 | p.W219R  | c.655T>C   | Unverified | TGC | TGG | ATG | 1 | T | C |
| TCGA-23-1123 | EMR3        | ENST00000253673 | p.D261D  | c.783T>C   | Verified   | AAA | GAT | CAA | 3 | T | C |

|              |            |                 |          |           |            |     |     |     |   |   |   |
|--------------|------------|-----------------|----------|-----------|------------|-----|-----|-----|---|---|---|
| TCGA-23-1123 | EMR3       | ENST00000253673 | p.D261D  | c.783T>C  | Verified   | AAA | GAT | CAA | 3 | T | C |
| TCGA-13-0905 | ENPP3      | ENST00000357639 | p.L651L  | c.1951T>C | Verified   | CAG | TTG | GGA | 1 | T | C |
| TCGA-24-1469 | ENPP4      | ENST00000371401 | p.N165N  | c.495T>C  | Verified   | CTA | AAT | AAT | 3 | T | C |
| TCGA-13-1488 | ENSG00000  | ENST00000334042 | p.S280S  | c.840T>C  | Verified   | TGC | TCT | TTC | 3 | T | C |
| TCGA-13-0884 | ENSG00000  | ENST00000433532 | p.M50T   | c.149T>C  | Verified   | CGC | ATG | CAG | 2 | T | C |
| TCGA-61-1738 | ENSG00000  | ENST00000430863 | p.F80L   | c.238T>C  | Unverified | ATG | TTC | ATG | 1 | T | C |
| TCGA-61-1738 | ENSG00000  | ENST00000430863 | p.F80L   | c.238T>C  | Unverified | ATG | TTC | ATG | 1 | T | C |
| TCGA-24-2280 | EPB41      | ENST00000349460 | p.S569P  | c.1705T>C | Unverified | ACA | TCT | GAG | 1 | T | C |
| TCGA-24-1470 | EPHA1      | ENST00000275815 | p.L710P  | c.2129T>C | Verified   | GCC | CTG | GAT | 2 | T | C |
| TCGA-29-1763 | EPS15L1    | ENST00000248070 | p.L139S  | c.416T>C  | Unverified | CTC | TTG | CCC | 2 | T | C |
| TCGA-13-0884 | EPSTI1     | ENST00000313640 | p.L333L  | c.997T>C  | Verified   | ATA | TTG | ACT | 1 | T | C |
| TCGA-13-1496 | ERI3       | ENST00000372257 | p.L149P  | c.446T>C  | Verified   | GTG | CTG | GAC | 2 | T | C |
| TCGA-29-1781 | ERO1L      | ENST00000395686 | p.V318A  | c.953T>C  | Unverified | AAA | GTG | TTA | 2 | T | C |
| TCGA-24-1846 | ERP44      | ENST00000262455 | p.F60L   | c.178T>C  | Unverified | CGT | TTC | AGT | 1 | T | C |
| TCGA-13-0924 | ESRRB      | NM_004452.2     | p.F45S   | c.134T>C  | Verified   | ggc | ttt | ggc | 2 | T | C |
| TCGA-61-2009 | EVI2A      | ENST00000247270 | p.F39L   | c.115T>C  | Verified   | GCC | TTT | CTG | 1 | T | C |
| TCGA-25-2392 | EXOC5      | ENST00000413566 | p.L145L  | c.433T>C  | Verified   | GAA | TTG | AAA | 1 | T | C |
| TCGA-25-2401 | EXPH5      | ENST00000265843 | p.F287S  | c.860T>C  | Verified   | ACC | TTT | TCT | 2 | T | C |
| TCGA-23-1022 | FAM135B    | ENST00000395297 | p.F1392S | c.4175T>C | Verified   | CTC | TTC | CTG | 2 | T | C |
| TCGA-13-0760 | FAM162A    | ENST00000477892 | p.D81D   | c.243T>C  | Verified   | gaa | gat | gaa | 3 | T | C |
| TCGA-09-2044 | FAM199X    | ENST00000493442 | p.F365L  | c.1093T>C | Verified   | ctc | ttc | ctt | 1 | T | C |
| TCGA-13-0884 | FAM24A     | ENST00000368894 | p.C82R   | c.244T>C  | Verified   | TGC | TGT | GAA | 1 | T | C |
| TCGA-61-1740 | FAM46B     | ENST00000289166 | p.C181R  | c.541T>C  | Unverified | GTG | TGC | ACA | 1 | T | C |
| TCGA-25-2042 | FAM48B1    | XM_093087.4     | p.P634P  | c.1902T>C | Unverified | aag | cct | gtg | 3 | T | C |
| TCGA-24-1422 | FAM55D     | ENST00000375478 | p.F275L  | c.823T>C  | Verified   | CTC | TTT | GAA | 1 | T | C |
| TCGA-24-1422 | FAM83B     | ENST00000306858 | p.N410N  | c.1230T>C | Verified   | ACC | AAT | AAT | 3 | T | C |
| TCGA-23-1032 | FANCM      | ENST00000267430 | p.G873G  | c.2619T>C | Unverified | CAC | GGT | ATT | 3 | T | C |
| TCGA-04-1655 | FASTKD3    | ENST00000264669 | p.F351F  | c.1053T>C | Unverified | TTT | TTT | ACA | 3 | T | C |
| TCGA-13-0924 | FASTKD3    | ENST00000264669 | p.P368P  | c.1104T>C | Verified   | GAT | CCT | GAA | 3 | T | C |
| TCGA-24-1103 | FAT1       | ENST00000441802 | p.S157P  | c.469T>C  | Verified   | GTT | TCT | TTA | 1 | T | C |
| TCGA-09-2050 | FAT4       | ENST00000330166 | p.I1429T | c.4286T>C | Verified   | TCT | ATT | GTT | 2 | T | C |
| TCGA-13-1505 | FAT4       | ENST00000330166 | p.Y1137Y | c.3411T>C | Verified   | AGG | TAT | TCT | 3 | T | C |
| TCGA-09-2050 | FAT4_ENSTC | ENST00000394329 | p.I1429T | c.4286T>C | Verified   | TCT | ATT | GTT | 2 | T | C |
| TCGA-13-1505 | FAT4_ENSTC | ENST00000394329 | p.Y1137Y | c.3411T>C | Verified   | AGG | TAT | TCT | 3 | T | C |

|              |             |                 |          |            |            |     |     |     |   |   |   |
|--------------|-------------|-----------------|----------|------------|------------|-----|-----|-----|---|---|---|
| TCGA-29-1763 | FBLN2       | ENST00000404922 | p.C508R  | c.1522T>C  | Unverified | ACC | TGC | CAC | 1 | T | C |
| TCGA-29-1763 | FBLN2_ENST  | ENST00000492059 | p.C1089R | c.3265T>C  | Unverified | ACC | TGC | CAC | 1 | T | C |
| TCGA-13-1481 | FBXW8       | ENST00000309909 | p.I125T  | c.374T>C   | Verified   | gca | atc | aat | 2 | T | C |
| TCGA-24-1469 | FCGBP       | ENST00000221347 | p.L242P  | c.725T>C   | Verified   | CAG | CTG | CTA | 2 | T | C |
| TCGA-10-0930 | FCGR1A      | ENST00000369168 | p.Y245H  | c.733T>C   | Verified   | GAA | TAC | CAA | 1 | T | C |
| TCGA-10-0930 | FCGR1A      | ENST00000369168 | p.Y245H  | c.733T>C   | Verified   | GAA | TAC | CAA | 1 | T | C |
| TCGA-09-2044 | FCHSD1      | ENST00000435817 | p.V309A  | c.926T>C   | Verified   | cag | gtg | tgt | 2 | T | C |
| TCGA-04-1347 | FCRL1       | ENST00000368176 | p.S235S  | c.705T>C   | Verified   | GGC | TCT | CCT | 3 | T | C |
| TCGA-04-1342 | FCRL5       | ENST00000361835 | p.F787F  | c.2361T>C  | Unverified | TTT | TTT | CAT | 3 | T | C |
| TCGA-23-1029 | FGF10       | ENST00000264664 | p.N162N  | c.486T>C   | Unverified | TAC | AAT | ACC | 3 | T | C |
| TCGA-09-2049 | FGF12       | ENST00000454309 | p.F49L   | c.145T>C   | Unverified | GTG | TTC | AGC | 1 | T | C |
| TCGA-09-2044 | FGF14       | ENST00000376131 | p.L180L  | c.538T>C   | Verified   | GGA | TTA | AAT | 1 | T | C |
| TCGA-25-2393 | FILIP1L     | ENST00000331335 | p.V822A  | c.2465T>C  | Verified   | GCA | GTC | ATC | 2 | T | C |
| TCGA-29-1690 | FILIP1L     | ENST00000331335 | p.I764T  | c.2291T>C  | Unverified | GAG | ATT | GAA | 2 | T | C |
| TCGA-29-1690 | FILIP1L_ENS | ENST00000354552 | p.I764T  | c.2291T>C  | Unverified | GAG | ATT | GAA | 2 | T | C |
| TCGA-30-1855 | FLG         | ENST00000368799 | p.S3915S | c.11745T>C | Unverified | CAG | TCT | TCA | 3 | T | C |
| TCGA-61-1738 | FLJ43860    | ENST00000599122 | p.F80L   | c.238T>C   | Unverified | ATG | TTC | ATG | 1 | T | C |
| TCGA-61-1738 | FLJ43860    | ENST00000599122 | p.F80L   | c.238T>C   | Unverified | ATG | TTC | ATG | 1 | T | C |
| TCGA-61-1910 | FLRT3       | ENST00000378053 | p.S284S  | c.852T>C   | Unverified | CTA | AGT | AAT | 3 | T | C |
| TCGA-13-1499 | FLT1        | ENST00000282397 | p.F490L  | c.1468T>C  | Verified   | TCC | TTT | ATC | 1 | T | C |
| TCGA-09-0369 | FLT3        | ENST00000241453 | p.V615A  | c.1844T>C  | Verified   | AAG | GTA | CTA | 2 | T | C |
| TCGA-09-0369 | FLT3        | ENST00000241453 | p.V615A  | c.1844T>C  | Verified   | AAG | GTA | CTA | 2 | T | C |
| TCGA-23-1032 | FMNL2       | ENST00000288670 | p.P559P  | c.1677T>C  | Unverified | CCC | CCT | CCT | 3 | T | C |
| TCGA-29-1784 | FN1         | ENST00000336916 | p.P1212P | c.3636T>C  | Unverified | ACC | CCT | ACA | 3 | T | C |
| TCGA-29-1784 | FN1_ENST00  | ENST00000354785 | p.P1212P | c.3636T>C  | Unverified | ACC | CCT | ACA | 3 | T | C |
| TCGA-13-1510 | FNBP4       | ENST00000263773 | p.L686P  | c.2057T>C  | Unverified | TCA | CTC | ATG | 2 | T | C |
| TCGA-29-1699 | FNDC7_ENS   | ENST00000370017 | p.N475N  | c.1425T>C  | Unverified | ATT | AAT | GTG | 3 | T | C |
| TCGA-30-1857 | FOXP3       | ENST00000376207 | p.V283A  | c.848T>C   | Unverified | atc | gta | gct | 2 | T | C |
| TCGA-23-1022 | FREM2       | ENST00000280481 | p.I1963T | c.5888T>C  | Verified   | CGG | ATA | GTC | 2 | T | C |
| TCGA-61-1915 | FRMPD3      | XM_042978.4     | p.L924P  | c.2771T>C  | Unverified | tct | ctc | caa | 2 | T | C |
| TCGA-61-1915 | FRMPD3_EN   | ENST00000276185 | p.L875P  | c.2624T>C  | Unverified | TCT | CTC | CAA | 2 | T | C |
| TCGA-61-2113 | GABBR1      | ENST00000377034 | p.T369T  | c.1107T>C  | Verified   | GAG | ACT | GAA | 3 | T | C |
| TCGA-23-2078 | GABBR2      | ENST00000259455 | p.I879T  | c.2636T>C  | Verified   | CCT | ATA | GAA | 2 | T | C |
| TCGA-24-1464 | GAN         | ENST00000248272 | p.I73T   | c.218T>C   | Verified   | AAG | ATT | GAA | 2 | T | C |



|              |          |                 |          |           |            |     |     |     |   |   |   |
|--------------|----------|-----------------|----------|-----------|------------|-----|-----|-----|---|---|---|
| TCGA-30-1714 | GATM     | ENST00000396659 | p.V245A  | c.734T>C  | Unverified | TTT | GTG | ACA | 2 | T | C |
| TCGA-29-1776 | GBA2     | ENST00000378103 | p.V201A  | c.602T>C  | Unverified | ACT | GTG | TAC | 2 | T | C |
| TCGA-29-1690 | GBF1     | ENST00000369983 | p.L1426P | c.4277T>C | Unverified | AGT | CTG | AAT | 2 | T | C |
| TCGA-23-1123 | GC       | ENST00000273951 | p.M185T  | c.554T>C  | Verified   | TCT | ATG | GTA | 2 | T | C |
| TCGA-23-1123 | GC       | ENST00000273951 | p.M185T  | c.554T>C  | Verified   | TCT | ATG | GTA | 2 | T | C |
| TCGA-29-1768 | GCNT3    | ENST00000396065 | p.F119S  | c.356T>C  | Unverified | AAG | TTC | ATA | 2 | T | C |
| TCGA-61-1895 | GCNT3    | ENST00000396065 | p.S47S   | c.141T>C  | Unverified | GAA | TCT | CAA | 3 | T | C |
| TCGA-30-1855 | GDAP2    | ENST00000369443 | p.F205F  | c.615T>C  | Unverified | GTA | TTT | GCT | 3 | T | C |
| TCGA-24-1844 | GJA3     | ENST00000241125 | p.L93P   | c.278T>C  | Unverified | TAC | CTG | GGC | 2 | T | C |
| TCGA-13-1501 | GNL1     | ENST00000376621 | p.A233A  | c.699T>C  | Verified   | CCA | GCT | CTT | 3 | T | C |
| TCGA-13-1501 | GNL1     | ENST00000376621 | p.A233A  | c.699T>C  | Verified   | CCA | GCT | CTT | 3 | T | C |
| TCGA-61-1907 | GNL3L    | ENST00000336470 | p.S563S  | c.1689T>C | Unverified | ctg | tct | gat | 3 | T | C |
| TCGA-09-2049 | GNRHR    | ENST00000226413 | p.T42T   | c.126T>C  | Verified   | GTT | ACT | TTC | 3 | T | C |
| TCGA-24-1843 | GOLGA6B  | ENST00000421285 | p.V351A  | c.1052T>C | Unverified | GAG | GTG | CAG | 2 | T | C |
| TCGA-04-1347 | GOT1L1   | ENST00000307599 | p.L306P  | c.917T>C  | Verified   | GCT | CTG | CTG | 2 | T | C |
| TCGA-29-1711 | GPR116   | ENST00000265417 | p.L1260S | c.3779T>C | Unverified | GGA | TTA | TTC | 2 | T | C |
| TCGA-29-1711 | GPR116   | ENST00000265417 | p.L1260S | c.3779T>C | Unverified | GGA | TTA | TTC | 2 | T | C |
| TCGA-13-1509 | GPR158   | ENST00000376351 | p.G1017G | c.3051T>C | Verified   | CCT | GGT | CCT | 3 | T | C |
| TCGA-25-2401 | GPR162   | ENST00000311268 | p.V548A  | c.1643T>C | Verified   | GCC | GTT | GGA | 2 | T | C |
| TCGA-09-2050 | GPR97    | ENST00000333493 | p.S416S  | c.1248T>C | Verified   | ACC | TCT | CTG | 3 | T | C |
| TCGA-29-1761 | GPR98    | ENST00000405460 | p.V2288A | c.6863T>C | Unverified | GTT | GTC | TCA | 2 | T | C |
| TCGA-09-2050 | GRIN3A   | ENST00000361820 | p.L727L  | c.2179T>C | Verified   | CTC | TTG | TTT | 1 | T | C |
| TCGA-13-0755 | GRM3     | ENST00000361669 | p.C641C  | c.1923T>C | Verified   | ATC | TGT | GCA | 3 | T | C |
| TCGA-61-1740 | GTF2IRD2 | ENST00000405086 | p.S188S  | c.564T>C  | Unverified | GAG | AGT | CAG | 3 | T | C |
| TCGA-13-0761 | GUCY2C   | ENST00000261170 | p.C685C  | c.2055T>C | Verified   | AGC | TGT | CGG | 3 | T | C |
| TCGA-13-0761 | GUCY2C   | ENST00000261170 | p.C685C  | c.2055T>C | Verified   | AGC | TGT | CGG | 3 | T | C |
| TCGA-24-1616 | GULP1    | ENST00000359135 | p.I220T  | c.659T>C  | Verified   | ATG | ATT | CCA | 2 | T | C |
| TCGA-29-1691 | HABP2    | ENST00000351270 | p.I412I  | c.1236T>C | Unverified | GAT | ATT | GCA | 3 | T | C |
| TCGA-09-1665 | HCFC2    | ENST00000229330 | p.S203S  | c.609T>C  | Verified   | GAT | TCT | GGA | 3 | T | C |
| TCGA-13-0904 | HDAC6    | ENST00000334136 | p.L508L  | c.1522T>C | Verified   | atc | ttg | cgg | 1 | T | C |
| TCGA-24-1435 | HEATR7B2 | ENST00000399564 | p.I783T  | c.2348T>C | Verified   | CTG | ATT | GGT | 2 | T | C |
| TCGA-24-2035 | HERC1    | ENST00000443617 | p.P1418P | c.4254T>C | Verified   | CCA | CCT | CCT | 3 | T | C |
| TCGA-04-1336 | HERC5    | NM_016323.1     | p.T616T  | c.1848T>C | Verified   | atg | act | gtg | 3 | T | C |
| TCGA-04-1652 | HIPK3    | ENST00000303296 | p.V351A  | c.1052T>C | Unverified | cat | gta | tca | 2 | T | C |

|              |            |                     |          |           |            |     |     |     |   |   |   |
|--------------|------------|---------------------|----------|-----------|------------|-----|-----|-----|---|---|---|
| TCGA-04-1652 | HIPK3      | ENST00000303296     | p.V351A  | c.1052T>C | Unverified | cat | gta | tca | 2 | T | C |
| TCGA-23-1114 | HIVEP1     | ENST00000379388     | p.A268A  | c.804T>C  | Unverified | TCT | GCT | GCT | 3 | T | C |
| TCGA-61-2109 | HIVEP2     | ENST00000012134     | p.F577L  | c.1729T>C | Unverified | GTA | TTC | TAT | 1 | T | C |
| TCGA-24-1470 | HIVEP3     | ENST00000372583     | p.I858T  | c.2573T>C | Verified   | GAG | ATC | CTA | 2 | T | C |
| TCGA-29-1695 | HNRNPD     | ENST00000313899     | p.C252C  | c.756T>C  | Unverified | AAA | TGT | GAA | 3 | T | C |
| TCGA-29-1695 | HNRPD      | ENST00000353341     | p.C252C  | c.756T>C  | Unverified | AAA | TGT | GAA | 3 | T | C |
| TCGA-24-2267 | HSD3B2     | ENST00000369416     | p.F275F  | c.825T>C  | Verified   | GAG | TTT | GGC | 3 | T | C |
| TCGA-23-1021 | HSPA4L     | ENST00000508776     | p.L41L   | c.121T>C  | Verified   | tca | ttg | gga | 1 | T | C |
| TCGA-23-2078 | HSPA5      | ENST00000324460     | p.D578D  | c.1734T>C | Unverified | gga | gat | aaa | 3 | T | C |
| TCGA-13-0791 | HTR1F      | ENST00000319595     | p.L114P  | c.341T>C  | Verified   | CAT | CTC | TCA | 2 | T | C |
| TCGA-24-1104 | HTR2A      | ENST00000378688     | p.F186L  | c.556T>C  | Verified   | CGC | TTC | AAC | 1 | T | C |
| TCGA-23-1122 | HTR3E      | ENST00000335304     | p.L99P   | c.296T>C  | Verified   | CAC | CTC | TTG | 2 | T | C |
| TCGA-29-1691 | HUWE1      | XM_497119.1         | p.L976L  | c.2926T>C | Unverified | ggg | tta | tct | 1 | T | C |
| TCGA-29-1691 | HUWE1_EN!  | ENST00000342160     | p.L1113L | c.3337T>C | Unverified | GGG | TTA | TCT | 1 | T | C |
| TCGA-29-1761 | HYDIN      | ENST00000321489     | p.T905T  | c.2715T>C | Unverified | TCC | ACT | ATT | 3 | T | C |
| TCGA-29-1761 | HYDIN_ENST | ENST00000316490_v65 | p.T905T  | c.2715T>C | Unverified | TCC | ACT | ATT | 3 | T | C |
| TCGA-29-1761 | HYDIN_ENST | ENST00000538248     | p.T932T  | c.2796T>C | Unverified | TCC | ACT | ATT | 3 | T | C |
| TCGA-29-1693 | IGSF9      | ENST00000361509     | p.L320P  | c.959T>C  | Unverified | GTG | CTC | TGC | 2 | T | C |
| TCGA-61-2113 | IKZF3      | ENST00000346872     | p.S497S  | c.1491T>C | Unverified | tcg | tct | cac | 3 | T | C |
| TCGA-04-1343 | IL13RA2    | ENST00000371936     | p.N194N  | c.582T>C  | Verified   | caa | aat | ata | 3 | T | C |
| TCGA-61-1907 | IL6ST      | ENST00000381298     | p.Y334H  | c.1000T>C | Unverified | tgg | tat | aaa | 1 | T | C |
| TCGA-29-1781 | IMPDH2     | ENST00000326739     | p.Y258Y  | c.774T>C  | Unverified | aag | tat | agg | 3 | T | C |
| TCGA-20-1685 | INPPL1     | ENST00000298229     | p.Y62Y   | c.186T>C  | Unverified | CTG | TAT | CAG | 3 | T | C |
| TCGA-24-0979 | INSR       | ENST00000302850     | p.F1298S | c.3893T>C | Verified   | AGC | TTT | CCA | 2 | T | C |
| TCGA-04-1342 | INTS5      | ENST00000330574     | p.L462P  | c.1385T>C | Verified   | GTG | CTA | GGC | 2 | T | C |
| TCGA-09-2050 | IQGAP2     | ENST00000274364     | p.I1308T | c.3923T>C | Verified   | ATA | ATT | GAT | 2 | T | C |
| TCGA-10-0930 | IRF2       | ENST00000393593     | p.W58R   | c.172T>C  | Verified   | AAC | TGG | GCA | 1 | T | C |
| TCGA-10-0930 | IRF2       | ENST00000393593     | p.W58R   | c.172T>C  | Verified   | AAC | TGG | GCA | 1 | T | C |
| TCGA-13-0904 | ISG20L2    | ENST00000368219     | p.V325A  | c.974T>C  | Verified   | TCT | GTG | GAA | 2 | T | C |
| TCGA-30-1856 | ITGA8      | ENST00000378076     | p.F276L  | c.826T>C  | Unverified | GAG | TTT | ACT | 1 | T | C |
| TCGA-24-1417 | ITGAD      | ENST00000389202     | p.I155T  | c.464T>C  | Unverified | CTG | ATT | GAC | 2 | T | C |
| TCGA-61-2008 | ITGAL      | ENST00000356798     | p.L510P  | c.1529T>C | Verified   | GAG | CTG | CAG | 2 | T | C |
| TCGA-61-1907 | ITGAM      | ENST00000287497     | p.F457L  | c.1369T>C | Unverified | tac | ttc | ggg | 1 | T | C |
| TCGA-29-1781 | ITIH1      | ENST00000273283     | p.I677T  | c.2030T>C | Unverified | ATC | ATC | CAC | 2 | T | C |

|              |            |                 |          |            |            |     |     |     |   |   |   |
|--------------|------------|-----------------|----------|------------|------------|-----|-----|-----|---|---|---|
| TCGA-25-2393 | JMJD1C     | ENST00000402544 | p.Y1855H | c.5563T>C  | Verified   | GTA | TAT | TCA | 1 | T | C |
| TCGA-24-1431 | KCNC2      | ENST00000298972 | p.L37P   | c.110T>C   | Unverified | CTT | CTT | GCC | 2 | T | C |
| TCGA-24-1435 | KCND3      | ENST00000369697 | p.V403V  | c.1209T>C  | Verified   | ATT | GTT | TCC | 3 | T | C |
| TCGA-13-1497 | KCNH1      | ENST00000271751 | p.L516P  | c.1547T>C  | Verified   | ATG | CTC | AAC | 2 | T | C |
| TCGA-61-1900 | KCNH5      | ENST00000322893 | p.L50P   | c.149T>C   | Unverified | AAA | CTC | TCT | 2 | T | C |
| TCGA-24-1463 | KCNJ8      | ENST00000240662 | p.L132P  | c.395T>C   | Unverified | TTT | CTC | TTC | 2 | T | C |
| TCGA-61-1907 | KERA       | ENST00000266719 | p.L254P  | c.761T>C   | Unverified | GGT | CTC | CCA | 2 | T | C |
| TCGA-29-1777 | KHDRBS2    | ENST00000281156 | p.D165D  | c.495T>C   | Unverified | AAT | GAT | GAA | 3 | T | C |
| TCGA-04-1655 | KIAA0355   | ENST00000299505 | p.I164T  | c.491T>C   | Unverified | GAC | ATT | GAG | 2 | T | C |
| TCGA-04-1331 | KIAA1109   | ENST00000264501 | p.S4903P | c.14707T>C | Verified   | AAT | TCC | TCT | 1 | T | C |
| TCGA-04-1542 | KIAA1486   | ENST00000272907 | p.I36T   | c.107T>C   | Verified   | ggt | att | cag | 2 | T | C |
| TCGA-61-2094 | KIAA1751   | ENST00000270720 | p.L450S  | c.1349T>C  | Unverified | ACG | TTA | GCT | 2 | T | C |
| TCGA-24-2267 | KIAA1797   | ENST00000380249 | p.S126S  | c.378T>C   | Verified   | CAG | AGT | ATA | 3 | T | C |
| TCGA-04-1530 | KIAA2018   | ENST00000316407 | p.H901H  | c.2703T>C  | Unverified | GAA | CAT | TTT | 3 | T | C |
| TCGA-20-0990 | KIF20B     | ENST00000260753 | p.P495P  | c.1485T>C  | Verified   | GGA | CCT | GTC | 3 | T | C |
| TCGA-04-1342 | KIT        | ENST00000288135 | p.I957T  | c.2870T>C  | Verified   | cgg | atc | aat | 2 | T | C |
| TCGA-25-1326 | KRT28      | ENST00000306658 | p.L377P  | c.1130T>C  | Verified   | CTC | CTC | GAT | 2 | T | C |
| TCGA-61-1910 | KRT85      | ENST00000257901 | p.Y299H  | c.895T>C   | Unverified | CAG | TAT | GAC | 1 | T | C |
| TCGA-13-0893 | KRTAP10-11 | ENST00000334670 | p.S166P  | c.496T>C   | Verified   | TCC | TCT | TCA | 1 | T | C |
| TCGA-24-1474 | KRTAP27-1  | ENST00000382835 | p.F151S  | c.452T>C   | Verified   | AAT | TTC | GAA | 2 | T | C |
| TCGA-04-1356 | KRTAP5-3   | ENST00000399685 | p.C17C   | c.51T>C    | Verified   | GGC | TGT | GGC | 3 | T | C |
| TCGA-29-1775 | KRTAP5-6   | ENST00000382160 | p.S72P   | c.214T>C   | Unverified | GGC | TCT | TGT | 1 | T | C |
| TCGA-25-2398 | KRTAP9-3   | ENST00000411528 | p.C76C   | c.228T>C   | Verified   | TGC | TGT | AGC | 3 | T | C |
| TCGA-13-0793 | LAMA4      | ENST00000389463 | p.S964S  | c.2892T>C  | Verified   | GAC | TCT | CTG | 3 | T | C |
| TCGA-24-1422 | LCLAT1     | ENST00000309052 | p.I8T    | c.23T>C    | Verified   | GAA | ATT | GTG | 2 | T | C |
| TCGA-09-2050 | LHCGR      | ENST00000294954 | p.M582T  | c.1745T>C  | Verified   | TGC | ATG | GCA | 2 | T | C |
| TCGA-24-1843 | LHX8       | ENST00000294638 | p.S101P  | c.301T>C   | Unverified | CTC | TCC | TGC | 1 | T | C |
| TCGA-29-1703 | LMBRD1     | ENST00000370577 | p.I390T  | c.1169T>C  | Unverified | GGC | ATA | TGG | 2 | T | C |
| TCGA-24-1846 | LOC441504  | XM_497127.1     | p.A127A  | c.381T>C   | Unverified | cta | gct | caa | 3 | T | C |
| TCGA-23-1022 | LOC51059   | ENST00000395297 | p.F1392S | c.4175T>C  | Verified   | CTC | TTC | CTG | 2 | T | C |
| TCGA-29-1761 | LOC652153  | ENST00000316490 | p.T905T  | c.2715T>C  | Unverified | TCC | ACT | ATT | 3 | T | C |
| TCGA-13-0795 | LOXL4      | ENST00000260702 | p.I678T  | c.2033T>C  | Verified   | gac | att | gat | 2 | T | C |
| TCGA-24-1846 | LPAL2      | ENST00000335388 | p.S54S   | c.162T>C   | Unverified | TCA | TCT | ATG | 3 | T | C |
| TCGA-29-1781 | LPAR3      | ENST00000370611 | p.M242T  | c.725T>C   | Unverified | GTG | ATG | ACT | 2 | T | C |

|              |            |                 |          |           |            |     |     |     |   |   |   |
|--------------|------------|-----------------|----------|-----------|------------|-----|-----|-----|---|---|---|
| TCGA-25-1318 | LPHN2      | ENST00000359929 | p.F13L   | c.37T>C   | Verified   | TGG | TTT | ATC | 1 | T | C |
| TCGA-25-1318 | LPHN2      | ENST00000359929 | p.F13L   | c.37T>C   | Verified   | TGG | TTT | ATC | 1 | T | C |
| TCGA-61-1915 | LRCH1      | ENST00000389798 | p.L612P  | c.1835T>C | Unverified | GTC | CTC | TGC | 2 | T | C |
| TCGA-61-1915 | LRCH1_ENST | ENST00000311191 | p.L612P  | c.1835T>C | Unverified | GTC | CTC | TGC | 2 | T | C |
| TCGA-61-1915 | LRIT2      | ENST00000372113 | p.F521F  | c.1563T>C | Unverified | TCC | TTT | AGA | 3 | T | C |
| TCGA-09-2056 | LRP1B      | ENST00000389484 | p.W1749R | c.5245T>C | Verified   | TAT | TGG | ATC | 1 | T | C |
| TCGA-30-1855 | LRP2       | ENST00000263816 | p.Y2601H | c.7801T>C | Unverified | CTC | TAT | GGC | 1 | T | C |
| TCGA-04-1331 | LRP2       | ENST00000263816 | p.L2297S | c.6890T>C | Unverified | AAT | TTG | AAA | 2 | T | C |
| TCGA-25-2391 | LRRC15     | ENST00000347624 | p.I431T  | c.1292T>C | Unverified | GAC | ATC | CTT | 2 | T | C |
| TCGA-30-1891 | LRRC16A    | ENST00000399313 | p.F616F  | c.1848T>C | Unverified | GGC | TTT | CAG | 3 | T | C |
| TCGA-23-1031 | LRRIQ1     | ENST00000256007 | p.L1096P | c.3287T>C | Verified   | GAT | CTT | AAA | 2 | T | C |
| TCGA-24-2290 | LRRIQ3     | ENST00000395089 | p.L170L  | c.510T>C  | Verified   | CAT | CTT | CCT | 3 | T | C |
| TCGA-24-2290 | LRRIQ3     | ENST00000395089 | p.L170L  | c.510T>C  | Verified   | CAT | CTT | CCT | 3 | T | C |
| TCGA-29-1764 | LRRK1      | SU_LRRK1        | p.I1825T | c.5474T>C | Unverified | tcc | atc | gcg | 2 | T | C |
| TCGA-29-1764 | LRRK1_ENST | ENST00000388948 | p.I1813T | c.5438T>C | Unverified | TCC | ATC | GCG | 2 | T | C |
| TCGA-09-0369 | LRRK2      | SU_LRRK2        | p.I952T  | c.2855T>C | Verified   | aaa | ata | tta | 2 | T | C |
| TCGA-09-0369 | LRRK2      | SU_LRRK2        | p.I952T  | c.2855T>C | Verified   | aaa | ata | tta | 2 | T | C |
| TCGA-61-2012 | LRRK2      | SU_LRRK2        | p.I1192T | c.3575T>C | Verified   | gca | att | tta | 2 | T | C |
| TCGA-09-0369 | LRRK2_ENST | ENST00000298910 | p.I952T  | c.2855T>C | Verified   | AAA | ATA | TTA | 2 | T | C |
| TCGA-09-0369 | LRRK2_ENST | ENST00000298910 | p.I952T  | c.2855T>C | Verified   | AAA | ATA | TTA | 2 | T | C |
| TCGA-61-2012 | LRRK2_ENST | ENST00000298910 | p.I1192T | c.3575T>C | Verified   | GCA | ATT | TTA | 2 | T | C |
| TCGA-23-1114 | MAG        | ENST00000361922 | p.V469A  | c.1406T>C | Unverified | CTC | GTG | CTC | 2 | T | C |
| TCGA-23-1114 | MAG_ENST   | ENST00000392213 | p.V469A  | c.1406T>C | Unverified | CTC | GTG | CTC | 2 | T | C |
| TCGA-24-1847 | MAGEB4     | ENST00000378982 | p.N298N  | c.894T>C  | Unverified | CCC | AAT | AAC | 3 | T | C |
| TCGA-29-1783 | MAGEB6     | ENST00000379034 | p.V342A  | c.1025T>C | Unverified | tac | gtg | gtt | 2 | T | C |
| TCGA-29-1770 | MAMDC2     | ENST00000377182 | p.V6A    | c.17T>C   | Unverified | GGC | GTC | CTC | 2 | T | C |
| TCGA-24-2289 | MAN2A1     | ENST00000261483 | p.V318V  | c.954T>C  | Unverified | GCA | GTT | AAA | 3 | T | C |
| TCGA-24-2289 | MAP2       | ENST00000360351 | p.V1476A | c.4427T>C | Unverified | GAA | GTT | CAG | 2 | T | C |
| TCGA-61-1738 | MAP3K1     | XM_042066       | p.C547R  | c.1639T>C | Unverified | ctg | tgc | aaa | 1 | T | C |
| TCGA-61-1738 | MAP3K1     | XM_042066       | p.C547R  | c.1639T>C | Unverified | ctg | tgc | aaa | 1 | T | C |
| TCGA-61-1738 | MAP3K1_EN  | ENST00000399503 | p.C710R  | c.2128T>C | Unverified | CTG | TGC | AAA | 1 | T | C |
| TCGA-61-1738 | MAP3K1_EN  | ENST00000399503 | p.C710R  | c.2128T>C | Unverified | CTG | TGC | AAA | 1 | T | C |
| TCGA-29-1699 | MAP3K10    | ENST00000253055 | p.L391P  | c.1172T>C | Unverified | GAC | CTT | CGG | 2 | T | C |
| TCGA-23-1111 | MAP4       | ENST00000360240 | p.V192A  | c.575T>C  | Unverified | TCT | GTG | GAA | 2 | T | C |

|              |            |                     |          |            |            |     |     |     |   |   |   |
|--------------|------------|---------------------|----------|------------|------------|-----|-----|-----|---|---|---|
| TCGA-23-1111 | MAP4_ENST  | ENST00000395734_v68 | p.V192A  | c.575T>C   | Unverified | TCT | GTG | GAA | 2 | T | C |
| TCGA-13-0916 | MAS1L      | ENST00000377127     | p.L131L  | c.391T>C   | Verified   | TTC | TTA | CAG | 1 | T | C |
| TCGA-30-1855 | MCART1     | ENST00000377716     | p.Y173Y  | c.519T>C   | Unverified | TAT | TAT | CGA | 3 | T | C |
| TCGA-13-1488 | MCOLN2     | ENST00000370608     | p.L188P  | c.563T>C   | Verified   | GAG | CTC | GAT | 2 | T | C |
| TCGA-61-2102 | MCOLN2     | ENST00000370608     | p.F466S  | c.1397T>C  | Verified   | ATG | TTT | GCA | 2 | T | C |
| TCGA-61-2008 | MCOLN2     | ENST00000370608     | p.D463D  | c.1389T>C  | Verified   | GGT | GAT | GAC | 3 | T | C |
| TCGA-25-2392 | MDN1       | ENST00000369393     | p.L4459P | c.13376T>C | Verified   | GCA | CTA | GTT | 2 | T | C |
| TCGA-24-1469 | MDN1       | ENST00000369393     | p.G4842G | c.14526T>C | Unverified | GAT | GGT | GGA | 3 | T | C |
| TCGA-13-0905 | MEP1A      | ENST00000230588     | p.F37F   | c.111T>C   | Verified   | GAT | TTT | GGT | 3 | T | C |
| TCGA-24-2288 | MFN1       | ENST00000263969     | p.L484P  | c.1451T>C  | Unverified | TTA | CTT | CCA | 2 | T | C |
| TCGA-29-1763 | MKNK1      | ENST00000371946     | p.L218L  | c.652T>C   | Unverified | ata | ttg | tgt | 1 | T | C |
| TCGA-24-0979 | MLH3       | NM_014381.1         | p.F491S  | c.1472T>C  | Verified   | tct | ttc | ctg | 2 | T | C |
| TCGA-61-1998 | MLL4       | ENST00000222270     | p.H332H  | c.996T>C   | Unverified | CAA | CAT | GAG | 3 | T | C |
| TCGA-24-1474 | MLXIP      | ENST00000319080     | p.F185L  | c.553T>C   | Unverified | CAC | TTT | GTG | 1 | T | C |
| TCGA-09-2049 | MMAA       | ENST00000281317     | p.I275T  | c.824T>C   | Verified   | GGT | ATC | AAA | 2 | T | C |
| TCGA-13-0903 | MMP8       | ENST00000236826     | p.L291P  | c.872T>C   | Verified   | aca | ctc | cgt | 2 | T | C |
| TCGA-24-1104 | MMRN1      | ENST00000394980     | p.L9P    | c.26T>C    | Verified   | GTC | CTT | CTT | 2 | T | C |
| TCGA-29-1784 | MOBK1A     | ENST00000309395     | p.M119T  | c.356T>C   | Unverified | ttg | atg | act | 2 | T | C |
| TCGA-04-1331 | MRPL11     | ENST00000310999     | p.L91P   | c.272T>C   | Unverified | TTC | CTG | AAG | 2 | T | C |
| TCGA-23-1117 | MS4A2      | ENST00000278888     | p.M238T  | c.713T>C   | Verified   | GAA | ATG | TCT | 2 | T | C |
| TCGA-23-1117 | MS4A2      | ENST00000278888     | p.M238T  | c.713T>C   | Verified   | GAA | ATG | TCT | 2 | T | C |
| TCGA-29-1695 | MT-ATP6    | ENST00000361899     | p.L137L  | c.411T>C   | Unverified | CCC | CTT | ATC | 3 | T | C |
| TCGA-29-1695 | MT-ATP6_EN | ENST00000361899_v68 | p.L137L  | c.411T>C   | Unverified | CCC | CTT | ATC | 3 | T | C |
| TCGA-24-2290 | MTBP       | ENST00000305949     | p.C853C  | c.2559T>C  | Verified   | gaa | tgt | ttc | 3 | T | C |
| TCGA-24-2290 | MTBP       | ENST00000305949     | p.C853C  | c.2559T>C  | Verified   | gaa | tgt | ttc | 3 | T | C |
| TCGA-20-1683 | MT-CO1     | ENST00000361624     | p.F8S    | c.23T>C    | Unverified | CTA | TTC | TCT | 2 | T | C |
| TCGA-20-1683 | MT-CO1_EN  | ENST00000361624_v68 | p.F8S    | c.23T>C    | Unverified | CTA | TTC | TCT | 2 | T | C |
| TCGA-04-1651 | MT-CO3     | ENST00000362079     | p.I167I  | c.501T>C   | Unverified | ACA | ATT | TTA | 3 | T | C |
| TCGA-04-1651 | MT-CO3     | ENST00000362079     | p.I167I  | c.501T>C   | Unverified | ACA | ATT | TTA | 3 | T | C |
| TCGA-04-1651 | MT-CO3_EN  | ENST00000362079_v68 | p.I167I  | c.501T>C   | Unverified | ACA | ATT | TTA | 3 | T | C |
| TCGA-04-1651 | MT-CO3_EN  | ENST00000362079_v68 | p.I167I  | c.501T>C   | Unverified | ACA | ATT | TTA | 3 | T | C |
| TCGA-04-1651 | MT-CYB     | ENST00000361789     | p.T7T    | c.21T>C    | Unverified | AAA | ACT | AAC | 3 | T | C |
| TCGA-04-1651 | MT-CYB     | ENST00000361789     | p.T7T    | c.21T>C    | Unverified | AAA | ACT | AAC | 3 | T | C |
| TCGA-61-1907 | MT-CYB     | ENST00000361789     | p.I188I  | c.564T>C   | Unverified | TTC | ATT | ATT | 3 | T | C |

|              |            |                     |          |            |            |     |     |     |   |   |   |
|--------------|------------|---------------------|----------|------------|------------|-----|-----|-----|---|---|---|
| TCGA-04-1651 | MT-CYB_EN' | ENST00000361789_v68 | p.T7T    | c.21T>C    | Unverified | AAA | ACT | AAC | 3 | T | C |
| TCGA-04-1651 | MT-CYB_EN' | ENST00000361789_v68 | p.T7T    | c.21T>C    | Unverified | AAA | ACT | AAC | 3 | T | C |
| TCGA-61-1907 | MT-CYB_EN' | ENST00000361789_v68 | p.I188I  | c.564T>C   | Unverified | TTC | ATT | ATT | 3 | T | C |
| TCGA-04-1338 | MTERFD1    | ENST00000287025     | p.V391A  | c.1172T>C  | Verified   | CTA | GTA | TCT | 2 | T | C |
| TCGA-29-1698 | MT-ND3     | ENST00000361227     | p.L5S    | c.14T>C    | Unverified | CTC | TTA | TTA | 2 | T | C |
| TCGA-24-1431 | MTR        | ENST00000366577     | p.L568L  | c.1702T>C  | Verified   | ACA | TTA | CCT | 1 | T | C |
| TCGA-13-1501 | MTUS2_ENS  | ENST00000431530     | p.L91P   | c.272T>C   | Verified   | CAA | CTT | CAG | 2 | T | C |
| TCGA-13-1501 | MTUS2_ENS  | ENST00000431530     | p.L91P   | c.272T>C   | Verified   | CAA | CTT | CAG | 2 | T | C |
| TCGA-04-1542 | MYBL1      | ENST00000522677     | p.M307T  | c.920T>C   | Verified   | aac | atg | tct | 2 | T | C |
| TCGA-09-1665 | MYBL2      | ENST00000217026     | p.L631P  | c.1892T>C  | Unverified | TTG | CTC | AAC | 2 | T | C |
| TCGA-23-1124 | MYH11      | ENST00000338282     | p.I786T  | c.2357T>C  | Verified   | AAG | ATC | ACC | 2 | T | C |
| TCGA-25-2401 | MYL4       | ENST00000393450     | p.L111P  | c.332T>C   | Verified   | ATG | CTG | GAC | 2 | T | C |
| TCGA-13-0714 | MYO5A      | ENST00000399231     | p.S1797S | c.5391T>C  | Verified   | GTC | TCT | GTG | 3 | T | C |
| TCGA-61-2012 | NAALADL1   | ENST00000358658     | p.A738A  | c.2214T>C  | Unverified | GTG | GCT | GAC | 3 | T | C |
| TCGA-13-1497 | NALCN      | ENST00000251127     | p.L1576P | c.4727T>C  | Verified   | TGG | CTC | AAG | 2 | T | C |
| TCGA-23-1029 | NARG2      | ENST00000261520     | p.N729N  | c.2187T>C  | Unverified | GGA | AAT | TTT | 3 | T | C |
| TCGA-13-1488 | NAT2       | ENST00000286479     | p.L225S  | c.674T>C   | Verified   | TCC | TTG | CAG | 2 | T | C |
| TCGA-13-1408 | NAV3       | NM_014903.3         | p.S1075P | c.3223T>C  | Verified   | ggg | tca | tct | 1 | T | C |
| TCGA-61-2012 | NBEA       | ENST00000310336     | p.I1735I | c.5205T>C  | Verified   | AGC | ATT | AGT | 3 | T | C |
| TCGA-24-0979 | NCKAP1L    | ENST00000293373     | p.F375L  | c.1123T>C  | Verified   | TCC | TTC | ATT | 1 | T | C |
| TCGA-24-1464 | NEB        | ENST00000409198     | p.D4895D | c.14685T>C | Verified   | ACA | GAT | ACA | 3 | T | C |
| TCGA-61-1910 | NEDD4L     | ENST00000382850     | p.F128F  | c.384T>C   | Unverified | ACA | TTT | AAG | 3 | T | C |
| TCGA-61-1910 | NEDD4L_EN  | ENST00000400345     | p.F128F  | c.384T>C   | Unverified | ACA | TTT | AAG | 3 | T | C |
| TCGA-61-1913 | NEK10      | SU_NEK10            | p.L459L  | c.1377T>C  | Unverified | aga | ctt | ttc | 3 | T | C |
| TCGA-61-1913 | NEK10_ENS' | ENST00000341435     | p.L459L  | c.1377T>C  | Unverified | AGA | CTT | TTC | 3 | T | C |
| TCGA-61-1913 | NEK10_ENS' | ENST00000429845     | p.L459L  | c.1377T>C  | Unverified | AGA | CTT | TTC | 3 | T | C |
| TCGA-13-0762 | NFATC2     | ENST00000396009     | p.I518T  | c.1553T>C  | Verified   | GGG | ATC | TTG | 2 | T | C |
| TCGA-13-0762 | NFATC2     | ENST00000396009     | p.I518T  | c.1553T>C  | Verified   | GGG | ATC | TTG | 2 | T | C |
| TCGA-23-1110 | NHEDC1     | ENST00000296422     | p.P121P  | c.363T>C   | Unverified | GTG | CCT | CCA | 3 | T | C |
| TCGA-24-0979 | NHLH1      | ENST00000302101     | p.M8T    | c.23T>C    | Verified   | ACC | ATG | GAG | 2 | T | C |
| TCGA-29-1701 | NHLRC1     | ENST00000340650     | p.H104H  | c.312T>C   | Unverified | GCC | CAT | CGC | 3 | T | C |
| TCGA-29-1691 | NLGN3      | ENST00000374051     | p.F416S  | c.1247T>C  | Unverified | AAT | TTT | GTG | 2 | T | C |
| TCGA-29-1691 | NLGN3_ENS  | ENST00000358741     | p.F436S  | c.1307T>C  | Unverified | AAT | TTT | GTG | 2 | T | C |
| TCGA-29-1777 | NLRP13     | ENST00000342929     | p.Y458Y  | c.1374T>C  | Unverified | GCC | TAT | TTT | 3 | T | C |

|              |            |                 |         |           |            |     |     |     |   |   |   |
|--------------|------------|-----------------|---------|-----------|------------|-----|-----|-----|---|---|---|
| TCGA-61-1914 | NMNAT2     | ENST00000287713 | p.C165R | c.493T>C  | Unverified | tgc | tgt | gtc | 1 | T | C |
| TCGA-25-2400 | NONO       | ENST00000276079 | p.F213L | c.637T>C  | Verified   | tcc | ttc | ctg | 1 | T | C |
| TCGA-61-1740 | NOS2       | ENST00000313735 | p.S758P | c.2272T>C | Unverified | CTC | TCC | TGT | 1 | T | C |
| TCGA-09-2050 | NOTCH3     | ENST00000263388 | p.V356A | c.1067T>C | Unverified | TGT | GTC | AGC | 2 | T | C |
| TCGA-36-1577 | NOVA1      | ENST00000539517 | p.V221A | c.662T>C  | Unverified | gtt | gtc | act | 2 | T | C |
| TCGA-13-1488 | NPFFR2     | ENST00000308744 | p.C455R | c.1363T>C | Verified   | CTC | TGC | CAA | 1 | T | C |
| TCGA-09-2044 | NPPA       | ENST00000376480 | p.Y151H | c.451T>C  | Verified   | CGG | TAC | TGA | 1 | T | C |
| TCGA-29-1762 | NPR1       | ENST00000368680 | p.Y614H | c.1840T>C | Unverified | gag | tac | tgt | 1 | T | C |
| TCGA-29-1784 | NR1D2      | ENST00000312521 | p.L318P | c.953T>C  | Unverified | CAT | CTC | AAT | 2 | T | C |
| TCGA-29-1691 | NR5A2      | ENST00000367362 | p.S205S | c.615T>C  | Unverified | ccc | tct | gac | 3 | T | C |
| TCGA-24-0979 | NSA2       | ENST00000296802 | p.V135V | c.405T>C  | Verified   | AAA | GTT | ATT | 3 | T | C |
| TCGA-24-1103 | NTRK1      | ENST00000524377 | p.C152C | c.456T>C  | Verified   | CAC | TGT | TCT | 3 | T | C |
| TCGA-29-1702 | NUF2       | ENST00000367900 | p.L334L | c.1000T>C | Unverified | AAA | TTG | AAG | 1 | T | C |
| TCGA-29-1702 | NUF2_ENST0 | ENST00000271452 | p.L334L | c.1000T>C | Unverified | AAA | TTG | AAG | 1 | T | C |
| TCGA-13-1488 | O5AK3_HUM  | ENST00000326876 | p.F101L | c.301T>C  | Verified   | CAA | TTC | TTA | 1 | T | C |
| TCGA-24-2289 | OCA2       | ENST00000354638 | p.N279N | c.837T>C  | Unverified | TTA | AAT | CCG | 3 | T | C |
| TCGA-13-0762 | ODF1       | ENST00000285402 | p.I125T | c.374T>C  | Verified   | AAC | ATT | TTA | 2 | T | C |
| TCGA-13-0762 | ODF1       | ENST00000285402 | p.I125T | c.374T>C  | Verified   | AAC | ATT | TTA | 2 | T | C |
| TCGA-24-2289 | OPHN1      | ENST00000355520 | p.F87S  | c.260T>C  | Unverified | tcc | ttc | aag | 2 | T | C |
| TCGA-13-1509 | OPRK1      | ENST00000265572 | p.C345R | c.1033T>C | Verified   | TTC | TGC | TTT | 1 | T | C |
| TCGA-29-1698 | OR1L4      | ENST00000259466 | p.F69S  | c.206T>C  | Unverified | TCT | TTC | ATG | 2 | T | C |
| TCGA-61-2113 | OR1L8      | ENST00000304865 | p.V143A | c.428T>C  | Verified   | TGT | GTC | CTG | 2 | T | C |
| TCGA-23-2077 | OR2A7      | ENST00000493325 | p.S242P | c.724T>C  | Verified   | TTC | TCC | CAC | 1 | T | C |
| TCGA-24-1846 | OR2B11     | ENST00000318749 | p.S155S | c.465T>C  | Unverified | CTC | AGT | GGC | 3 | T | C |
| TCGA-61-1733 | OR2L3      | ENST00000359959 | p.S152P | c.454T>C  | Unverified | GGC | TCG | ATC | 1 | T | C |
| TCGA-61-1733 | OR2L3      | ENST00000359959 | p.S152P | c.454T>C  | Unverified | GGC | TCG | ATC | 1 | T | C |
| TCGA-04-1343 | OR2T6      | ENST00000355728 | p.L55P  | c.164T>C  | Verified   | CAT | CTC | CAC | 2 | T | C |
| TCGA-29-1784 | OR2W5      | ENST00000366492 | p.F157L | c.469T>C  | Unverified | TCC | TTC | ATC | 1 | T | C |
| TCGA-13-1497 | OR4C12     | ENST00000335238 | p.I67T  | c.200T>C  | Verified   | TTG | ATA | GAC | 2 | T | C |
| TCGA-09-1674 | OR4C13     | ENST00000555099 | p.Y63H  | c.187T>C  | Unverified | GCC | TAT | CTC | 1 | T | C |
| TCGA-24-1435 | OR4D10     | ENST00000313265 | p.I74T  | c.221T>C  | Verified   | TCC | ATC | ACA | 2 | T | C |
| TCGA-24-2262 | OR4D10     | ENST00000313265 | p.F100F | c.300T>C  | Verified   | ATG | TTT | CTA | 3 | T | C |
| TCGA-24-1616 | OR4K1      | ENST00000285600 | p.F26L  | c.76T>C   | Verified   | CTT | TTC | TTT | 1 | T | C |
| TCGA-24-2288 | OR4K13     | ENST00000315693 | p.Y275H | c.823T>C  | Unverified | TTT | TAC | ACA | 1 | T | C |

|              |           |                 |          |           |            |     |     |     |   |   |   |
|--------------|-----------|-----------------|----------|-----------|------------|-----|-----|-----|---|---|---|
| TCGA-24-1844 | OR4K17    | ENST00000315543 | p.V277A  | c.830T>C  | Unverified | ACA | GTG | GTG | 2 | T | C |
| TCGA-29-1761 | OR4K2     | ENST00000298642 | p.F27S   | c.80T>C   | Unverified | TTT | TTC | TTT | 2 | T | C |
| TCGA-25-2393 | OR5AS1    | ENST00000313555 | p.P183P  | c.549T>C  | Verified   | CCA | CCT | CTT | 3 | T | C |
| TCGA-13-1489 | OR5B21    | ENST00000360374 | p.G137G  | c.411T>C  | Verified   | GCA | GGT | GTG | 3 | T | C |
| TCGA-04-1342 | OR5D14    | ENST00000335605 | p.Y134Y  | c.402T>C  | Verified   | CTT | TAT | ACA | 3 | T | C |
| TCGA-13-0885 | OR5T1     | ENST00000313033 | p.Y213H  | c.637T>C  | Verified   | TTC | TAC | TTT | 1 | T | C |
| TCGA-24-2280 | OR6A2     | ENST00000332601 | p.L34P   | c.101T>C  | Unverified | CTG | CTG | GCC | 2 | T | C |
| TCGA-29-1691 | OR6N1     | ENST00000335094 | p.T38T   | c.114T>C  | Unverified | ATG | ACT | GTG | 3 | T | C |
| TCGA-13-0762 | OR8B12    | ENST00000306842 | p.V204A  | c.611T>C  | Verified   | GCT | GTT | GAC | 2 | T | C |
| TCGA-13-0762 | OR8B12    | ENST00000306842 | p.V204A  | c.611T>C  | Verified   | GCT | GTT | GAC | 2 | T | C |
| TCGA-24-1423 | OSMR      | ENST00000274276 | p.M949T  | c.2846T>C | Verified   | CAA | ATG | GCA | 2 | T | C |
| TCGA-13-0791 | OVCH1     | ENST00000318184 | p.V102A  | c.305T>C  | Verified   | ACT | GTG | ACT | 2 | T | C |
| TCGA-29-1764 | OVCH1     | ENST00000318184 | p.L109P  | c.326T>C  | Unverified | AGC | CTC | TTT | 2 | T | C |
| TCGA-13-0893 | P2RY13    | ENST00000325602 | p.M291T  | c.872T>C  | Verified   | AGA | CTG | CAA | 2 | T | C |
| TCGA-20-1683 | PACS1     | ENST00000320580 | p.S242S  | c.726T>C  | Unverified | GTC | TCT | GTG | 3 | T | C |
| TCGA-25-1313 | PAK3      | ENST00000446737 | p.S509P  | c.1525T>C | Verified   | gga | tct | gcc | 1 | T | C |
| TCGA-09-1674 | PALB2     | ENST00000261584 | p.S500P  | c.1498T>C | Unverified | TTG | TCT | AGG | 1 | T | C |
| TCGA-30-1891 | PAOX      | ENST00000278060 | p.F208S  | c.623T>C  | Verified   | CCC | TTT | GGG | 2 | T | C |
| TCGA-30-1891 | PAOX_ENST | ENST00000357296 | p.F208S  | c.623T>C  | Verified   | CCC | TTT | GGG | 2 | T | C |
| TCGA-13-0885 | PARG      | ENST00000402038 | p.S654S  | c.1962T>C | Verified   | TAT | TCT | AGT | 3 | T | C |
| TCGA-23-2078 | PCDHA3    | ENST00000378129 | p.C759R  | c.2275T>C | Unverified | GTG | TGC | TCT | 1 | T | C |
| TCGA-24-2024 | PCDHB11   | ENST00000354757 | p.L140P  | c.419T>C  | Verified   | CTC | CTA | GAA | 2 | T | C |
| TCGA-29-1766 | PCDHB4    | ENST00000194152 | p.L490P  | c.1469T>C | Unverified | CTG | CTG | CCG | 2 | T | C |
| TCGA-24-2267 | PCDHB7    | ENST00000231137 | p.L301P  | c.902T>C  | Verified   | AGT | CTT | CAT | 2 | T | C |
| TCGA-09-2049 | PCOLCE2   | ENST00000295992 | p.G289G  | c.867T>C  | Verified   | ACG | GGT | TTA | 3 | T | C |
| TCGA-24-1845 | PDE11A    | ENST00000286063 | p.P516P  | c.1548T>C | Unverified | GTC | CCT | ATT | 3 | T | C |
| TCGA-24-1845 | PDE11A_EN | ENST00000358450 | p.P266P  | c.798T>C  | Unverified | GTC | CCT | ATT | 3 | T | C |
| TCGA-04-1361 | PDE4C     | ENST00000355502 | p.L457P  | c.1370T>C | Verified   | GTG | CTG | GAG | 2 | T | C |
| TCGA-04-1361 | PDE4C     | ENST00000355502 | p.L457P  | c.1370T>C | Verified   | GTG | CTG | GAG | 2 | T | C |
| TCGA-13-0761 | PDGFRA    | ENST00000257290 | p.F238L  | c.712T>C  | Unverified | GTT | TTT | AAC | 1 | T | C |
| TCGA-13-0761 | PDGFRA    | ENST00000257290 | p.F238L  | c.712T>C  | Unverified | GTT | TTT | AAC | 1 | T | C |
| TCGA-13-0762 | PDGFRA    | ENST00000257290 | p.F238L  | c.712T>C  | Unverified | GTT | TTT | AAC | 1 | T | C |
| TCGA-13-0762 | PDGFRA    | ENST00000257290 | p.F238L  | c.712T>C  | Unverified | GTT | TTT | AAC | 1 | T | C |
| TCGA-29-1784 | PER1      | ENST00000317276 | p.V1184A | c.3551T>C | Unverified | GCT | GTG | CAC | 2 | T | C |



|              |            |                 |          |             |            |     |     |     |   |   |   |
|--------------|------------|-----------------|----------|-------------|------------|-----|-----|-----|---|---|---|
| TCGA-29-1781 | PEX12      | ENST00000225873 | p.L65P   | c.194T>C    | Unverified | ACT | CTG | CTA | 2 | T | C |
| TCGA-30-1855 | PGBD2      | ENST00000355360 | p.V239A  | c.716T>C    | Unverified | TAT | GTC | ATT | 2 | T | C |
| TCGA-30-1855 | PGBD2_ENS  | ENST00000329291 | p.V490A  | c.1469T>C   | Unverified | TAT | GTC | ATT | 2 | T | C |
| TCGA-29-1711 | PGLYRP3    | ENST00000290722 | p.L15P   | c.44T>C     | Unverified | GGT | CTC | CAG | 2 | T | C |
| TCGA-29-1711 | PGLYRP3    | ENST00000290722 | p.L15P   | c.44T>C     | Unverified | GGT | CTC | CAG | 2 | T | C |
| TCGA-13-0906 | PHACTR1    | ENST00000332995 | p.L72P   | c.215T>C    | Unverified | TAC | CTC | GCA | 2 | T | C |
| TCGA-20-1685 | PHIP       | ENST00000275034 | p.V771A  | c.2312T>C   | Unverified | ACT | GTC | TCA | 2 | T | C |
| TCGA-13-1509 | PIGM       | ENST00000368090 | p.F259F  | c.777T>C    | Verified   | tac | ttt | tat | 3 | T | C |
| TCGA-29-1693 | PIK3C3     | ENST00000262039 | p.M787T  | c.2360T>C   | Unverified | gga | atg | ggg | 2 | T | C |
| TCGA-61-1899 | PIK3CB     | ENST00000477593 | p.F876L  | c.2626T>C   | Unverified | gcc | ttc | aac | 1 | T | C |
| TCGA-04-1331 | PIP5K1C    | ENST00000335312 | p.?      | c.1345+2T>C | Unverified | TCC | TCC | CTG | 1 | T | C |
| TCGA-24-2267 | PISD       | ENST00000382151 | p.N357N  | c.1071T>C   | Verified   | TTC | AAT | TTC | 3 | T | C |
| TCGA-23-1120 | PKD1L1     | ENST00000289672 | p.V1371A | c.4112T>C   | Verified   | TCT | GTT | CTT | 2 | T | C |
| TCGA-13-1496 | PKHD1      | ENST00000371117 | p.Y3631Y | c.10893T>C  | Verified   | CAT | TAT | AGA | 3 | T | C |
| TCGA-24-2280 | PKP4       | ENST00000389759 | p.L442S  | c.1325T>C   | Unverified | GCG | TTG | TAT | 2 | T | C |
| TCGA-29-1768 | PLAA       | ENST00000380086 | p.V553A  | c.1658T>C   | Unverified | ATT | GTC | TTT | 2 | T | C |
| TCGA-20-1687 | PLB1       | ENST00000327757 | p.W1127R | c.3379T>C   | Unverified | TCT | TGG | AGC | 1 | T | C |
| TCGA-20-1687 | PLB1_ENSTC | ENST00000422425 | p.W1116R | c.3346T>C   | Unverified | TCT | TGG | AGC | 1 | T | C |
| TCGA-24-1604 | PLEK       | ENST00000234313 | p.F224L  | c.670T>C    | Verified   | GGG | TTC | TTC | 1 | T | C |
| TCGA-61-1740 | PLVAP      | ENST00000252590 | p.L278P  | c.833T>C    | Unverified | AGC | CTC | ATG | 2 | T | C |
| TCGA-24-0979 | POLK       | ENST00000241436 | p.N98N   | c.294T>C    | Verified   | CGA | AAT | TTG | 3 | T | C |
| TCGA-30-1855 | PON3       | ENST00000265627 | p.T349T  | c.1047T>C   | Unverified | AAA | ACT | CTG | 3 | T | C |
| TCGA-29-1777 | POSTN      | ENST00000379747 | p.C44C   | c.132T>C    | Unverified | GTC | TGT | GCC | 3 | T | C |
| TCGA-61-2109 | POT1       | ENST00000357628 | p.I78T   | c.233T>C    | Unverified | GAT | ATT | GTT | 2 | T | C |
| TCGA-29-1693 | PPEF2      | ENST00000286719 | p.V274A  | c.821T>C    | Unverified | gat | gtt | ttc | 2 | T | C |
| TCGA-13-1509 | PPM1F      | ENST00000263212 | p.F242S  | c.725T>C    | Verified   | atg | ttt | ctc | 2 | T | C |
| TCGA-24-1469 | PPP1R12A   | ENST00000261207 | p.I276T  | c.827T>C    | Verified   | gac | att | tta | 2 | T | C |
| TCGA-24-1844 | PPP1R3A    | NM_002711.2     | p.F1100L | c.3298T>C   | Unverified | aca | ttc | tac | 1 | T | C |
| TCGA-29-1784 | PPP1R3A    | NM_002711.2     | p.D345D  | c.1035T>C   | Unverified | aca | gat | cca | 3 | T | C |
| TCGA-29-1705 | PPP1R3F    | ENST00000055335 | p.N656N  | c.1968T>C   | Unverified | atg | aat | agg | 3 | T | C |
| TCGA-13-0904 | PPP1R7     | ENST00000407025 | p.Y258H  | c.772T>C    | Verified   | ctg | tac | ctt | 1 | T | C |
| TCGA-24-2035 | PPP1R7     | ENST00000407025 | p.S177S  | c.531T>C    | Verified   | atc | agt | aaa | 3 | T | C |
| TCGA-04-1649 | PPP2R2A_EI | ENST00000380737 | p.F77L   | c.229T>C    | Unverified | ACC | TTC | CAG | 1 | T | C |
| TCGA-29-1691 | PRG2_ENST  | ENST00000311862 | p.V74A   | c.221T>C    | Unverified | GCT | GTT | GAG | 2 | T | C |

|              |           |                 |          |           |            |     |     |     |   |   |   |
|--------------|-----------|-----------------|----------|-----------|------------|-----|-----|-----|---|---|---|
| TCGA-24-2289 | PRKD3     | ENST00000379066 | p.F307S  | c.920T>C  | Unverified | AAA | TTC | AAC | 2 | T | C |
| TCGA-24-2289 | PRKD3_ENS | ENST00000379066 | p.F307S  | c.920T>C  | Unverified | AAA | TTC | AAC | 2 | T | C |
| TCGA-24-1563 | PRR21     | ENST00000408934 | p.H51H   | c.153T>C  | Unverified | CTT | CAT | CCA | 3 | T | C |
| TCGA-04-1638 | PSME4     | NM_014614.1     | p.D931D  | c.2793T>C | Unverified | cat | gat | tgg | 3 | T | C |
| TCGA-04-1638 | PSME4_ENS | ENST00000404125 | p.D1045D | c.3135T>C | Unverified | CAT | GAT | TGG | 3 | T | C |
| TCGA-13-0760 | PTER      | ENST00000378000 | p.L14P   | c.41T>C   | Verified   | GGC | CTT | GTA | 2 | T | C |
| TCGA-13-0890 | PTH       | ENST00000282091 | p.T110T  | c.330T>C  | Verified   | TTA | ACT | AAA | 3 | T | C |
| TCGA-13-0920 | PTPN13    | ENST00000436978 | p.I2373T | c.7118T>C | Verified   | CAT | ATT | TCT | 2 | T | C |
| TCGA-13-0904 | PTPN18    | ENST00000175756 | p.Y144H  | c.430T>C  | Verified   | cgg | tac | tgg | 1 | T | C |
| TCGA-04-1652 | PTPN21    | ENST00000328736 | p.V844A  | c.2531T>C | Unverified | CGA | GTA | GAT | 2 | T | C |
| TCGA-04-1652 | PTPN21    | ENST00000328736 | p.V844A  | c.2531T>C | Unverified | CGA | GTA | GAT | 2 | T | C |
| TCGA-29-1693 | PTPRD     | ENST00000381196 | p.D1064D | c.3192T>C | Unverified | GTG | GAT | GGC | 3 | T | C |
| TCGA-29-1693 | PTPRD_ENS | ENST00000355233 | p.D653D  | c.1959T>C | Unverified | GTG | GAT | GGC | 3 | T | C |
| TCGA-29-1693 | PTPRD_ENS | ENST00000381196 | p.D1064D | c.3192T>C | Unverified | GTG | GAT | GGC | 3 | T | C |
| TCGA-23-1809 | PTPRH     | ENST00000376350 | p.M1002T | c.3005T>C | Unverified | AGG | ATG | CTT | 2 | T | C |
| TCGA-24-0979 | PXDNL_ENS | ENST00000356297 | p.L1126P | c.3377T>C | Verified   | AGG | CTC | TTC | 2 | T | C |
| TCGA-13-0792 | PYGM      | ENST00000164139 | p.I276T  | c.827T>C  | Verified   | AAC | ATC | TCT | 2 | T | C |
| TCGA-24-1470 | Q8N8KO_HL | ENST00000301807 | p.M740T  | c.2219T>C | Verified   | AAA | ATG | ACC | 2 | T | C |
| TCGA-24-1422 | RAB11B    | ENST00000328024 | p.V134A  | c.401T>C  | Unverified | GCT | GTG | CCC | 2 | T | C |
| TCGA-24-1563 | RAB27A    | ENST00000396307 | p.L84L   | c.250T>C  | Verified   | agc | tta | acg | 1 | T | C |
| TCGA-24-0979 | RABGEF1   | ENST00000510829 | p.D313D  | c.939T>C  | Verified   | gcg | gat | gac | 3 | T | C |
| TCGA-24-2289 | RAD21     | ENST00000297338 | p.S195P  | c.583T>C  | Unverified | gag | tct | gaa | 1 | T | C |
| TCGA-29-1762 | RAD54B    | ENST00000336148 | p.S26S   | c.78T>C   | Unverified | aga | agt | aat | 3 | T | C |
| TCGA-20-0990 | RALYL     | ENST00000522455 | p.S107P  | c.319T>C  | Verified   | CTT | TCT | GCA | 1 | T | C |
| TCGA-29-1777 | RASA3     | ENST00000334062 | p.S444S  | c.1332T>C | Unverified | gag | tct | ggg | 3 | T | C |
| TCGA-13-0762 | RASGEF1A  | NM_145313.1     | p.L120L  | c.358T>C  | Unverified | tcc | ttg | gct | 1 | T | C |
| TCGA-13-0762 | RASGEF1A  | NM_145313.1     | p.L120L  | c.358T>C  | Unverified | tcc | ttg | gct | 1 | T | C |
| TCGA-24-0975 | RASGEF1A  | NM_145313.1     | p.V164A  | c.491T>C  | Unverified | ctg | gtg | ctg | 2 | T | C |
| TCGA-24-1103 | RBAK      | ENST00000353796 | p.Y233Y  | c.699T>C  | Verified   | ccc | tat | gag | 3 | T | C |
| TCGA-13-0755 | RBM34_ENS | ENST00000408888 | p.G51G   | c.153T>C  | Verified   | AGA | GGT | GGC | 3 | T | C |
| TCGA-61-2012 | RBM39     | ENST00000253363 | p.S246S  | c.738T>C  | Verified   | GGA | AGT | GCT | 3 | T | C |
| TCGA-24-1422 | RBM44     | ENST00000316997 | p.W786R  | c.2356T>C | Verified   | GAC | TGG | TCT | 1 | T | C |
| TCGA-25-2042 | RBM44     | ENST00000316997 | p.V902A  | c.2705T>C | Verified   | CCT | GTT | AAA | 2 | T | C |
| TCGA-13-0903 | RC3H2     | ENST00000373670 | p.Y589H  | c.1765T>C | Verified   | GTA | TAT | CCT | 1 | T | C |

|              |            |                 |          |           |            |     |     |     |   |   |   |
|--------------|------------|-----------------|----------|-----------|------------|-----|-----|-----|---|---|---|
| TCGA-13-0762 | RELN       | ENST00000343529 | p.M702T  | c.2105T>C | Verified   | GAG | ATG | GCA | 2 | T | C |
| TCGA-13-0762 | RELN       | ENST00000343529 | p.M702T  | c.2105T>C | Verified   | GAG | ATG | GCA | 2 | T | C |
| TCGA-29-1763 | RGAG1      | ENST00000465301 | p.A814A  | c.2442T>C | Unverified | CCA | GCT | TAT | 3 | T | C |
| TCGA-61-2012 | RGP1       | ENST00000456972 | p.V279A  | c.836T>C  | Verified   | GAC | GTG | GTG | 2 | T | C |
| TCGA-25-1313 | RGS20      | ENST00000297313 | p.I386I  | c.1158T>C | Verified   | tct | att | gaa | 3 | T | C |
| TCGA-61-1915 | RICTOR     | ENST00000357387 | p.A130A  | c.390T>C  | Unverified | ATA | GCT | AGG | 3 | T | C |
| TCGA-36-1577 | RIMBP2     | ENST00000261655 | p.I940T  | c.2819T>C | Verified   | AAA | ATA | GAG | 2 | T | C |
| TCGA-23-1117 | RIMS1      | ENST00000521978 | p.S989S  | c.2967T>C | Verified   | CGT | TCT | CCA | 3 | T | C |
| TCGA-23-1117 | RIMS1      | ENST00000521978 | p.S989S  | c.2967T>C | Verified   | CGT | TCT | CCA | 3 | T | C |
| TCGA-20-0991 | RIMS2      | ENST00000507740 | p.L580P  | c.1739T>C | Verified   | TTT | CTT | CCA | 2 | T | C |
| TCGA-20-0991 | RIMS2_ENS1 | ENST00000436393 | p.L566P  | c.1697T>C | Verified   | TTT | CTT | CCA | 2 | T | C |
| TCGA-61-1740 | RMND5A     | ENST00000283632 | p.I303T  | c.908T>C  | Unverified | GTG | ATT | GAA | 2 | T | C |
| TCGA-13-1488 | RNASE2     | ENST00000304625 | p.W37R   | c.109T>C  | Verified   | CAA | TGG | TTT | 1 | T | C |
| TCGA-24-1847 | RNF130     | ENST00000521389 | p.Y271H  | c.811T>C  | Unverified | agc | tat | aag | 1 | T | C |
| TCGA-24-1470 | RNF182     | ENST00000537663 | p.V235V  | c.705T>C  | Verified   | TGT | GTT | TGT | 3 | T | C |
| TCGA-23-1032 | RPLP0      | ENST00000392514 | p.S240S  | c.720T>C  | Verified   | CAT | TCT | ATC | 3 | T | C |
| TCGA-24-0979 | RPN1       | ENST00000296255 | p.I454T  | c.1361T>C | Verified   | GTT | ATC | ATC | 2 | T | C |
| TCGA-24-2262 | RPS27A     | ENST00000272317 | p.Y105H  | c.313T>C  | Verified   | AAA | TAT | TAT | 1 | T | C |
| TCGA-61-1914 | RTDR1      | ENST00000216036 | p.L113P  | c.338T>C  | Unverified | GCC | CTG | TCC | 2 | T | C |
| TCGA-24-1104 | RYK        | NM_002958       | p.I341T  | c.1022T>C | Verified   | cgt | att | ttc | 2 | T | C |
| TCGA-09-2044 | RYR2       | ENST00000366574 | p.L730P  | c.2189T>C | Verified   | GGC | CTT | CAT | 2 | T | C |
| TCGA-29-1781 | SAP18      | NM_005870.3     | p.N50N   | c.150T>C  | Unverified | gga | aat | gta | 3 | T | C |
| TCGA-25-1326 | SBNO1      | ENST00000267176 | p.L1083P | c.3248T>C | Verified   | GGC | CTG | ATA | 2 | T | C |
| TCGA-61-1915 | SCAND3     | ENST00000452236 | p.L1038L | c.3112T>C | Unverified | AGA | TTA | TTC | 1 | T | C |
| TCGA-13-1510 | SCN3A      | ENST00000283254 | p.V1432V | c.4296T>C | Verified   | GAT | GTT | AAA | 3 | T | C |
| TCGA-13-1499 | SCN5A      | ENST00000333535 | p.L921L  | c.2763T>C | Verified   | TTG | CTT | GTT | 3 | T | C |
| TCGA-29-1769 | SCN8A      | ENST00000354534 | p.F273L  | c.817T>C  | Unverified | CTG | TTC | ATG | 1 | T | C |
| TCGA-29-1769 | SCN8A_ENS1 | ENST00000354534 | p.F273L  | c.817T>C  | Unverified | CTG | TTC | ATG | 1 | T | C |
| TCGA-23-1120 | SCRN1      | ENST00000242059 | p.L127S  | c.380T>C  | Verified   | GCC | TTA | GAT | 2 | T | C |
| TCGA-24-2262 | SDAD1      | ENST00000356260 | p.V269A  | c.806T>C  | Verified   | AAA | GTG | CTC | 2 | T | C |
| TCGA-04-1347 | SEC23A     | ENST00000307712 | p.L637P  | c.1910T>C | Verified   | CTT | CTT | GAT | 2 | T | C |
| TCGA-09-2051 | SELP       | ENST00000367790 | p.S781S  | c.2343T>C | Unverified | GCT | TCT | ACG | 3 | T | C |
| TCGA-13-0893 | SEMA3D     | ENST00000284136 | p.D465D  | c.1395T>C | Verified   | TAC | GAT | GTA | 3 | T | C |
| TCGA-13-1496 | SERPINA3   | ENST00000393078 | p.S302P  | c.904T>C  | Verified   | gac | tct | ctg | 1 | T | C |

|              |            |                     |          |           |            |     |     |     |   |   |   |
|--------------|------------|---------------------|----------|-----------|------------|-----|-----|-----|---|---|---|
| TCGA-25-2392 | SETD5      | ENST00000302463     | p.S1229S | c.3687T>C | Verified   | CAT | TCT | GGA | 3 | T | C |
| TCGA-61-1900 | SFI1       | ENST00000400288     | p.L754P  | c.2261T>C | Unverified | TGT | CTG | CGG | 2 | T | C |
| TCGA-23-1123 | SFXN1      | ENST00000321442     | p.V229A  | c.686T>C  | Verified   | CAA | GTT | GTC | 2 | T | C |
| TCGA-23-1123 | SFXN1      | ENST00000321442     | p.V229A  | c.686T>C  | Verified   | CAA | GTT | GTC | 2 | T | C |
| TCGA-04-1356 | SHC4       | ENST00000332408     | p.N313N  | c.939T>C  | Verified   | GTT | AAT | CAA | 3 | T | C |
| TCGA-29-1698 | SIGLEC7    | ENST00000317643     | p.S271S  | c.813T>C  | Unverified | CAG | TCT | CTG | 3 | T | C |
| TCGA-29-1699 | SLC12A7    | ENST00000264930     | p.C163R  | c.487T>C  | Unverified | ACA | TGT | ACA | 1 | T | C |
| TCGA-13-0887 | SLC15A1    | ENST00000376503     | p.V366A  | c.1097T>C | Verified   | ATG | GTC | CTG | 2 | T | C |
| TCGA-24-1563 | SLC16A9    | ENST00000395347     | p.A299A  | c.897T>C  | Verified   | GTG | GCT | CTT | 3 | T | C |
| TCGA-13-0792 | SLC22A10   | ENST00000332793     | p.L180L  | c.538T>C  | Verified   | TGT | TTG | CTC | 1 | T | C |
| TCGA-23-1032 | SLC22A25   | ENST00000306494     | p.I75T   | c.224T>C  | Verified   | AGA | ATC | TCC | 2 | T | C |
| TCGA-30-1718 | SLC25A43   | ENST00000217909     | p.P336P  | c.1008T>C | Unverified | AAG | CCT | AAA | 3 | T | C |
| TCGA-23-1031 | SLC28A2    | ENST00000347644     | p.V284A  | c.851T>C  | Verified   | TGG | GTA | GTT | 2 | T | C |
| TCGA-23-2078 | SLC35E4    | ENST00000343605     | p.L162P  | c.485T>C  | Unverified | CCA | CTT | CAG | 2 | T | C |
| TCGA-13-1512 | SLC38A7    | ENST00000219320     | p.D18D   | c.54T>C   | Verified   | ACG | GAT | GCC | 3 | T | C |
| TCGA-24-1849 | SLC4A9     | ENST00000230993     | p.S81P   | c.241T>C  | Unverified | GCA | TCT | CTG | 1 | T | C |
| TCGA-24-1849 | SLC4A9_ENS | ENST00000230993_v65 | p.S81P   | c.241T>C  | Unverified | GCA | TCT | CTG | 1 | T | C |
| TCGA-04-1638 | SLC5A2     | ENST00000330498     | p.V298A  | c.893T>C  | Unverified | ATC | GTG | CAG | 2 | T | C |
| TCGA-29-1699 | SLC5A9     | ENST00000236495     | p.W648R  | c.1942T>C | Unverified | CTC | TGG | AGC | 1 | T | C |
| TCGA-23-1032 | SLC6A5     | ENST00000525748     | p.L478S  | c.1433T>C | Verified   | TCT | TTA | TCT | 2 | T | C |
| TCGA-13-0906 | SLC7A10    | ENST00000253188     | p.I285T  | c.854T>C  | Verified   | AAC | ATT | GCC | 2 | T | C |
| TCGA-20-0990 | SLCO1B3    | ENST00000381545     | p.F620F  | c.1860T>C | Verified   | GTA | TTT | TTT | 3 | T | C |
| TCGA-20-1683 | SLCO3A1    | ENST00000318445     | p.V364A  | c.1091T>C | Unverified | GCA | GTG | GTG | 2 | T | C |
| TCGA-24-1845 | SLITRK4    | ENST00000381779     | p.I607T  | c.1820T>C | Unverified | ccc | att | cga | 2 | T | C |
| TCGA-24-2288 | SLITRK4    | ENST00000381779     | p.I772T  | c.2315T>C | Unverified | agc | ata | ggt | 2 | T | C |
| TCGA-20-1683 | SMAD4      | ENST00000342988     | p.F310L  | c.928T>C  | Unverified | gca | ttc | cag | 1 | T | C |
| TCGA-24-2289 | SMARCA1    | NM_003069.2         | p.I804I  | c.2412T>C | Unverified | gaa | att | ctt | 3 | T | C |
| TCGA-29-1693 | SMARCC1    | ENST00000254480     | p.S748P  | c.2242T>C | Unverified | GCC | TCT | GGG | 1 | T | C |
| TCGA-61-1907 | SMC1A      | ENST00000322213     | p.I249T  | c.746T>C  | Unverified | gag | atc | gag | 2 | T | C |
| TCGA-23-1031 | SMC5       | ENST00000361138     | p.S792P  | c.2374T>C | Verified   | GCA | TCT | TCA | 1 | T | C |
| TCGA-29-1711 | SMC6       | ENST00000448223     | p.D594D  | c.1782T>C | Unverified | ata | gat | aat | 3 | T | C |
| TCGA-29-1711 | SMC6       | ENST00000448223     | p.D594D  | c.1782T>C | Unverified | ata | gat | aat | 3 | T | C |
| TCGA-23-1124 | SMG8       | ENST00000300917     | p.L532L  | c.1596T>C | Verified   | GCT | CTT | CGA | 3 | T | C |
| TCGA-61-2008 | SMS        | ENST00000404933     | p.D167D  | c.501T>C  | Verified   | ggg | gat | gtt | 3 | T | C |

|              |            |                    |          |           |            |     |     |     |   |   |   |
|--------------|------------|--------------------|----------|-----------|------------|-----|-----|-----|---|---|---|
| TCGA-13-0885 | SNRPD3     | ENST00000215829    | p.G4G    | c.12T>C   | Verified   | ATT | GGT | GTG | 3 | T | C |
| TCGA-13-0920 | SP100_ENST | ENST00000340126    | p.L815L  | c.2443T>C | Verified   | TGG | TTA | AAC | 1 | T | C |
| TCGA-30-1856 | SPAM1      | ENST00000340011    | p.S74P   | c.220T>C  | Unverified | TTC | TCT | TTC | 1 | T | C |
| TCGA-30-1856 | SPAM1_ENS  | ENST00000439500    | p.S74P   | c.220T>C  | Unverified | TTC | TCT | TTC | 1 | T | C |
| TCGA-23-1124 | SPATA8     | ENST00000328504    | p.C69R   | c.205T>C  | Verified   | AGC | TGT | TCT | 1 | T | C |
| TCGA-25-2392 | SPCS3      | ENST00000503362    | p.I66T   | c.197T>C  | Verified   | TTT | ATC | ACA | 2 | T | C |
| TCGA-23-1031 | SPG11      | ENST00000261866    | p.F118F  | c.354T>C  | Verified   | GAA | TTT | AAT | 3 | T | C |
| TCGA-24-1469 | SPHKAP     | XM_051221.5        | p.V440A  | c.1319T>C | Verified   | gtg | gtt | tct | 2 | T | C |
| TCGA-13-0924 | SPINK6     | ENST00000325630    | p.C30C   | c.90T>C   | Verified   | GAC | TGT | GGT | 3 | T | C |
| TCGA-13-0900 | SPRED2     | ENST00000356388    | p.S129P  | c.385T>C  | Unverified | ACG | TCA | TCT | 1 | T | C |
| TCGA-29-1761 | SRFBP1     | ENST00000339397    | p.V105A  | c.314T>C  | Unverified | GCA | GTA | CAT | 2 | T | C |
| TCGA-25-1318 | SRPRB      | ENST00000466490    | p.L129S  | c.386T>C  | Verified   | TTC | TTA | GAG | 2 | T | C |
| TCGA-25-1318 | SRPRB      | ENST00000466490    | p.L129S  | c.386T>C  | Verified   | TTC | TTA | GAG | 2 | T | C |
| TCGA-29-1691 | SRRM2      | ENST00000301740    | p.Y2390H | c.7168T>C | Unverified | GCC | TAC | GAG | 1 | T | C |
| TCGA-29-1699 | SSTR3      | ENST00000328544    | p.A157A  | c.471T>C  | Unverified | ACA | GCT | CCG | 3 | T | C |
| TCGA-04-1331 | SSX2IP     | ENST00000342203    | p.G245G  | c.735T>C  | Verified   | ACT | GGT | AAA | 3 | T | C |
| TCGA-13-0760 | STAT2      | ENST00000314128    | p.V286A  | c.857T>C  | Verified   | ctg | gtt | agc | 2 | T | C |
| TCGA-24-1431 | STEAP2     | ENST00000394621    | p.F146L  | c.436T>C  | Verified   | GGA | TTT | AAT | 1 | T | C |
| TCGA-23-1120 | STXBP5L    | ENST00000273666    | p.F4F    | c.12T>C   | Verified   | AAG | TTT | AAT | 3 | T | C |
| TCGA-13-0760 | SULF1      | ENST00000260128    | p.Y838Y  | c.2514T>C | Verified   | GGA | TAT | AAG | 3 | T | C |
| TCGA-29-1777 | SULT1A1    | ENST00000314752    | p.I4T    | c.11T>C   | Unverified | CTG | ATC | CAG | 2 | T | C |
| TCGA-29-1703 | SUSD4      | ENST00000344029    | p.L54L   | c.162T>C  | Unverified | GAC | CTT | CAA | 3 | T | C |
| TCGA-29-1703 | SUSD4_ENS  | ENST00000343846    | p.L54L   | c.162T>C  | Unverified | GAC | CTT | CAA | 3 | T | C |
| TCGA-23-1110 | SYNE2      | ENST00000358025    | p.L2603P | c.7808T>C | Verified   | CAA | CTT | GAA | 2 | T | C |
| TCGA-24-1423 | SYNJ1      | NM_003895.2        | p.L1328P | c.3983T>C | Verified   | gat | ctg | tca | 2 | T | C |
| TCGA-09-1665 | SYT1       | ENST00000393240    | p.F77F   | c.231T>C  | Verified   | TGC | TTT | TGT | 3 | T | C |
| TCGA-24-2035 | TACC2      | ENST00000369005    | p.L2915P | c.8744T>C | Unverified | CAG | CTG | CGA | 2 | T | C |
| TCGA-24-1847 | TARBP1     | ENST00000040877    | p.V1168A | c.3503T>C | Unverified | AGA | GTG | AAA | 2 | T | C |
| TCGA-13-0887 | TARBP1     | ENST00000040877    | p.A1198A | c.3594T>C | Verified   | CAG | GCT | GGT | 3 | T | C |
| TCGA-29-1691 | TAS2R9     | ENST00000240691    | p.T177T  | c.531T>C  | Unverified | GGT | ACT | TTC | 3 | T | C |
| TCGA-29-1691 | TCEANC     | OTTHUMT00000055796 | p.H42H   | c.126T>C  | Unverified | gag | cat | ctc | 3 | T | C |
| TCGA-61-1725 | TCF12      | ENST00000438423    | p.S508S  | c.1524T>C | Unverified | CTG | TCT | AGT | 3 | T | C |
| TCGA-61-1725 | TCF12_ENST | ENST00000343827    | p.S314S  | c.942T>C  | Unverified | CTG | TCT | AGT | 3 | T | C |
| TCGA-61-1725 | TCF12_ENST | ENST00000438423    | p.S508S  | c.1524T>C | Unverified | CTG | TCT | AGT | 3 | T | C |

|              |            |                 |          |           |            |     |     |     |   |   |   |
|--------------|------------|-----------------|----------|-----------|------------|-----|-----|-----|---|---|---|
| TCGA-61-1725 | TCF12_ENST | ENST00000452095 | p.S504S  | c.1512T>C | Unverified | CTG | TCT | AGT | 3 | T | C |
| TCGA-61-2095 | TCHP       | ENST00000312777 | p.L402P  | c.1205T>C | Unverified | TCC | CTG | AAA | 2 | T | C |
| TCGA-61-2095 | TCIRG1     | ENST00000265686 | p.V595A  | c.1784T>C | Unverified | TGT | GTC | TGG | 2 | T | C |
| TCGA-29-1777 | TCN2       | ENST00000215838 | p.M42T   | c.125T>C  | Unverified | TGG | ATG | GAC | 2 | T | C |
| TCGA-13-1498 | TCP11L2    | ENST00000299045 | p.V173A  | c.518T>C  | Verified   | GCT | GTT | GAC | 2 | T | C |
| TCGA-13-0884 | TDRD6      | ENST00000316081 | p.F976L  | c.2926T>C | Verified   | TAC | TTC | TAT | 1 | T | C |
| TCGA-24-2289 | TECTB      | ENST00000369422 | p.V143A  | c.428T>C  | Unverified | CAC | GTG | AAG | 2 | T | C |
| TCGA-61-2009 | TEX14      | ENST00000349033 | p.H1038H | c.3114T>C | Verified   | GAG | CAT | AGT | 3 | T | C |
| TCGA-23-1032 | TEX15      | ENST00000256246 | p.S160P  | c.478T>C  | Verified   | ATT | TCT | GTG | 1 | T | C |
| TCGA-13-0916 | TFAP2D     | ENST00000008391 | p.T365T  | c.1095T>C | Verified   | CCC | ACT | CCA | 3 | T | C |
| TCGA-29-1698 | TFDP1      | ENST00000375370 | p.C202C  | c.606T>C  | Unverified | gaa | tgt | cag | 3 | T | C |
| TCGA-29-1691 | TFSM1_HUM  | ENST00000314720 | p.H42H   | c.126T>C  | Unverified | GAG | CAT | CTC | 3 | T | C |
| TCGA-29-1777 | TG         | ENST00000220616 | p.L1152P | c.3455T>C | Unverified | GTG | CTC | AAG | 2 | T | C |
| TCGA-61-2113 | TG         | ENST00000220616 | p.V1511A | c.4532T>C | Verified   | TGT | GTC | ACT | 2 | T | C |
| TCGA-24-1422 | TG         | ENST00000220616 | p.H892H  | c.2676T>C | Verified   | GCA | CAT | TTT | 3 | T | C |
| TCGA-24-1417 | THPO       | ENST00000204615 | p.L195P  | c.584T>C  | Verified   | GAG | CTC | CCA | 2 | T | C |
| TCGA-13-0885 | THUMPD3    | ENST00000452837 | p.N160N  | c.480T>C  | Verified   | AAT | AAT | GGA | 3 | T | C |
| TCGA-24-2288 | TIGD6      | ENST00000296736 | p.T97T   | c.291T>C  | Unverified | GTG | ACT | GGT | 3 | T | C |
| TCGA-25-2398 | TIMELESS   | ENST00000553532 | p.S756S  | c.2268T>C | Verified   | CTT | AGT | GAC | 3 | T | C |
| TCGA-04-1652 | TLR7       | ENST00000380659 | p.F580F  | c.1740T>C | Unverified | tat | ttt | caa | 3 | T | C |
| TCGA-04-1652 | TLR7       | ENST00000380659 | p.F580F  | c.1740T>C | Unverified | tat | ttt | caa | 3 | T | C |
| TCGA-61-1737 | TM9SF2     | ENST00000376387 | p.Y150Y  | c.450T>C  | Unverified | AAT | TAT | CAA | 3 | T | C |
| TCGA-04-1638 | TMEFF1     | ENST00000374879 | p.I336T  | c.1007T>C | Unverified | ATT | ATT | GGA | 2 | T | C |
| TCGA-13-0924 | TMEM126A   | ENST00000304511 | p.V60A   | c.179T>C  | Verified   | AAT | GTG | ACA | 2 | T | C |
| TCGA-23-1809 | TMEM63C    | ENST00000298351 | p.S248S  | c.744T>C  | Unverified | GGC | AGT | GTC | 3 | T | C |
| TCGA-13-0886 | TNFRSF8    | ENST00000263932 | p.C122C  | c.366T>C  | Verified   | TCC | TGT | GCC | 3 | T | C |
| TCGA-29-1781 | TNFSF4     | ENST00000281834 | p.S134S  | c.402T>C  | Unverified | agg | tct | gtc | 3 | T | C |
| TCGA-04-1337 | TP53       | ENST00000269305 | p.C135R  | c.403T>C  | Verified   | TTT | TGC | CAA | 1 | T | C |
| TCGA-04-1649 | TP53       | ENST00000269305 | p.F270S  | c.809T>C  | Unverified | AGC | TTT | GAG | 2 | T | C |
| TCGA-13-0760 | TP53       | ENST00000269305 | p.L265P  | c.794T>C  | Verified   | CTA | CTG | GGA | 2 | T | C |
| TCGA-24-1104 | TP53       | ENST00000269305 | p.I195T  | c.584T>C  | Verified   | CTT | ATC | CGA | 2 | T | C |
| TCGA-24-1469 | TP53       | ENST00000269305 | p.I195T  | c.584T>C  | Verified   | CTT | ATC | CGA | 2 | T | C |
| TCGA-24-1563 | TP53       | ENST00000269305 | p.I195T  | c.584T>C  | Verified   | CTT | ATC | CGA | 2 | T | C |
| TCGA-04-1649 | TP53_ENSTC | ENST00000269305 | p.F270S  | c.809T>C  | Unverified | AGC | TTT | GAG | 2 | T | C |

|              |            |                 |           |            |            |     |     |     |   |   |   |
|--------------|------------|-----------------|-----------|------------|------------|-----|-----|-----|---|---|---|
| TCGA-04-1347 | TPX2       | ENST00000300403 | p.I151T   | c.452T>C   | Verified   | atc | atc | gat | 2 | T | C |
| TCGA-24-1470 | TRANK1     | ENST00000428977 | p.M740T   | c.2219T>C  | Verified   | AAA | ATG | ACC | 2 | T | C |
| TCGA-23-1118 | TRIM23     | ENST00000231524 | p.T442T   | c.1326T>C  | Verified   | gaa | act | gta | 3 | T | C |
| TCGA-29-1775 | TRIM31     | ENST00000376734 | p.S384S   | c.1152T>C  | Unverified | att | tct | ggt | 3 | T | C |
| TCGA-13-0906 | TRIM42     | ENST00000286349 | p.V420A   | c.1259T>C  | Unverified | AAA | GTG | AAC | 2 | T | C |
| TCGA-29-1763 | TRIOBP_ENS | ENST00000406386 | p.S516P   | c.1546T>C  | Unverified | ACC | TCC | TCT | 1 | T | C |
| TCGA-24-2267 | TRMT1L     | ENST00000367506 | p.Y251H   | c.751T>C   | Verified   | TCC | TAT | TTT | 1 | T | C |
| TCGA-25-2393 | TRPA1      | NM_007332.1     | p.F278S   | c.833T>C   | Verified   | cat | ttt | gct | 2 | T | C |
| TCGA-24-1563 | TRPA1      | NM_007332.1     | p.N143N   | c.429T>C   | Verified   | atg | aat | aat | 3 | T | C |
| TCGA-23-1117 | TRPC3      | ENST00000264811 | p.V710A   | c.2129T>C  | Verified   | CTA | GTT | CCT | 2 | T | C |
| TCGA-23-1117 | TRPC3      | ENST00000264811 | p.V710A   | c.2129T>C  | Verified   | CTA | GTT | CCT | 2 | T | C |
| TCGA-23-1021 | TRPM4      | ENST00000252826 | p.L641P   | c.1922T>C  | Verified   | CGC | CTC | CTC | 2 | T | C |
| TCGA-04-1338 | TRPV3      | ENST00000576742 | p.L541L   | c.1621T>C  | Verified   | TAC | TTG | TTT | 1 | T | C |
| TCGA-20-0991 | TSGA10     | ENST00000355053 | p.V321A   | c.962T>C   | Verified   | ATT | GTG | TGT | 2 | T | C |
| TCGA-24-1469 | TSHZ3      | NM_020856.1     | p.L255P   | c.764T>C   | Verified   | ctg | ctg | gat | 2 | T | C |
| TCGA-29-1761 | TSNARE1    | ENST00000307180 | p.L386P   | c.1157T>C  | Unverified | GAG | CTG | GCT | 2 | T | C |
| TCGA-23-1110 | TSPAN19    | ENST00000532498 | p.F97F    | c.291T>C   | Verified   | ACC | TTT | GCT | 3 | T | C |
| TCGA-29-1768 | TSPYL5     | ENST00000322128 | p.L224L   | c.672T>C   | Unverified | TAC | CTT | CGG | 3 | T | C |
| TCGA-30-1857 | TTC29      | ENST00000325106 | p.R460R   | c.1380T>C  | Unverified | GAA | CGT | TTG | 3 | T | C |
| TCGA-29-1761 | TTC6       | ENST00000267368 | p.I520T   | c.1559T>C  | Unverified | GTT | ATA | TGA | 2 | T | C |
| TCGA-29-1761 | TTC6_ENSTC | ENST00000553443 | p.I1886T  | c.5657T>C  | Unverified | GTT | ATA | TGA | 2 | T | C |
| TCGA-13-0762 | TTLL3      | ENST00000336674 | p.F361S   | c.1082T>C  | Unverified | CGC | TTT | TCC | 2 | T | C |
| TCGA-13-0762 | TTLL3      | ENST00000336674 | p.F361S   | c.1082T>C  | Unverified | CGC | TTT | TCC | 2 | T | C |
| TCGA-23-1110 | TTN        | NM_003319       | p.Y18577H | c.55729T>C | Verified   | gaa | tat | aac | 1 | T | C |
| TCGA-25-1326 | TTN        | NM_003319       | p.I18141T | c.54422T>C | Verified   | tat | att | gta | 2 | T | C |
| TCGA-29-1777 | TTN        | NM_003319       | p.L3252P  | c.9755T>C  | Unverified | ttg | cta | att | 2 | T | C |
| TCGA-61-1910 | TTN        | NM_003319       | p.T559T   | c.1677T>C  | Unverified | gaa | act | agg | 3 | T | C |
| TCGA-29-1777 | TTN_ENSTO( | ENST00000342175 | p.L3252P  | c.9755T>C  | Unverified | TTG | CTA | ATT | 2 | T | C |
| TCGA-61-1910 | TTN_ENSTO( | ENST00000342175 | p.T559T   | c.1677T>C  | Unverified | GAA | ACT | AGG | 3 | T | C |
| TCGA-29-1777 | TTN_ENSTO( | ENST00000342992 | p.L3298P  | c.9893T>C  | Unverified | TTG | CTA | ATT | 2 | T | C |
| TCGA-61-1910 | TTN_ENSTO( | ENST00000342992 | p.T605T   | c.1815T>C  | Unverified | GAA | ACT | AGG | 3 | T | C |
| TCGA-23-1110 | TTN_ENSTO( | ENST00000356127 | p.Y25072H | c.75214T>C | Verified   | GAA | TAT | AAC | 1 | T | C |
| TCGA-25-1326 | TTN_ENSTO( | ENST00000356127 | p.I24636T | c.73907T>C | Verified   | TAT | ATT | GTA | 2 | T | C |
| TCGA-29-1777 | TTN_ENSTO( | ENST00000356127 | p.L3298P  | c.9893T>C  | Unverified | TTG | CTA | ATT | 2 | T | C |

|              |                                |          |            |            |     |     |     |   |   |   |
|--------------|--------------------------------|----------|------------|------------|-----|-----|-----|---|---|---|
| TCGA-61-1910 | TTN_ENST00000356127            | p.T605T  | c.1815T>C  | Unverified | GAA | ACT | AGG | 3 | T | C |
| TCGA-29-1777 | TTN_ENST00000359218            | p.L3252P | c.9755T>C  | Unverified | TTG | CTA | ATT | 2 | T | C |
| TCGA-61-1910 | TTN_ENST00000359218            | p.T559T  | c.1677T>C  | Unverified | GAA | ACT | AGG | 3 | T | C |
| TCGA-29-1777 | TTN_ENST00000360870            | p.L3298P | c.9893T>C  | Unverified | TTG | CTA | ATT | 2 | T | C |
| TCGA-13-0760 | TTN_ENST00000360870            | p.D4524D | c.13572T>C | Verified   | TCA | GAT | TCA | 3 | T | C |
| TCGA-61-1910 | TTN_ENST00000360870            | p.T605T  | c.1815T>C  | Unverified | GAA | ACT | AGG | 3 | T | C |
| TCGA-13-1497 | TUBA3C ENST00000400113         | p.V115A  | c.344T>C   | Verified   | ATC | GTC | GAC | 2 | T | C |
| TCGA-13-0913 | TUBB3 ENST00000315491          | p.F85S   | c.254T>C   | Verified   | CTC | TTC | AGG | 2 | T | C |
| TCGA-24-2267 | TUBD1 ENST00000325752          | p.I423T  | c.1268T>C  | Verified   | tac | att | cat | 2 | T | C |
| TCGA-13-1481 | TUBGCP4 ENST00000564079        | p.H65H   | c.195T>C   | Verified   | GGC | CAT | GTG | 3 | T | C |
| TCGA-61-1998 | TXLNB ENST00000358430          | p.A632A  | c.1896T>C  | Unverified | CCT | GCT | CCA | 3 | T | C |
| TCGA-23-1122 | TYR ENST00000263321            | p.F207F  | c.621T>C   | Verified   | GCT | TTT | CTG | 3 | T | C |
| TCGA-29-1770 | U2SURP ENST00000319822         | p.S26P   | c.76T>C    | Unverified | GGA | TCT | TCA | 1 | T | C |
| TCGA-13-1509 | UBR2 ENST00000372899           | p.T245T  | c.735T>C   | Verified   | TAT | ACT | CTT | 3 | T | C |
| TCGA-24-2035 | UBTF ENST00000302904           | p.A488A  | c.1464T>C  | Unverified | AGA | GCT | GAG | 3 | T | C |
| TCGA-24-1417 | UCK2 ENST00000367879           | p.F196L  | c.586T>C   | Verified   | GAA | TTC | TGC | 1 | T | C |
| TCGA-13-0885 | UCP1 ENST00000262999           | p.F289L  | c.865T>C   | Verified   | TGC | TTT | GAA | 1 | T | C |
| TCGA-09-2044 | UGT1A10 ENST00000344644        | p.F219L  | c.655T>C   | Verified   | TTA | TTT | TGC | 1 | T | C |
| TCGA-23-1031 | UGT2B10_EI ENST00000265403_v61 | p.V130V  | c.390T>C   | Verified   | GTA | GTT | TCA | 3 | T | C |
| TCGA-13-0887 | UGT2B17 ENST00000317746        | p.P196P  | c.588T>C   | Verified   | GTA | CCT | GTT | 3 | T | C |
| TCGA-20-0991 | UNC13A ENST00000428389         | p.Y804Y  | c.2412T>C  | Unverified | ATC | TAT | GGG | 3 | T | C |
| TCGA-13-0886 | UNC5CL ENST00000373164         | p.W33R   | c.97T>C    | Verified   | CGA | TGG | CAC | 1 | T | C |
| TCGA-13-0760 | USH2A ENST00000307340          | p.Y2277H | c.6829T>C  | Verified   | TTA | TAT | CTA | 1 | T | C |
| TCGA-20-1686 | USP15 NM_006313.1              | p.S232P  | c.694T>C   | Unverified | aac | tca | aat | 1 | T | C |
| TCGA-10-0930 | USP24 XM_371254.3              | p.Y2338H | c.7012T>C  | Verified   | gtg | tac | tgc | 1 | T | C |
| TCGA-10-0930 | USP24 XM_371254.3              | p.Y2338H | c.7012T>C  | Verified   | gtg | tac | tgc | 1 | T | C |
| TCGA-24-1423 | USP46 ENST00000441222          | p.I208T  | c.623T>C   | Verified   | tcc | att | acc | 2 | T | C |
| TCGA-61-1740 | USP54 NM_152586.2              | p.Y206Y  | c.618T>C   | Unverified | acc | tat | agg | 3 | T | C |
| TCGA-61-1740 | USP54_ENST00000408019          | p.Y1118Y | c.3354T>C  | Unverified | ACC | TAT | AGG | 3 | T | C |
| TCGA-23-1120 | VAV3 ENST00000370056           | p.D374D  | c.1122T>C  | Verified   | AGA | GAT | AAT | 3 | T | C |
| TCGA-09-2056 | VCAN ENST00000265077           | p.T2265T | c.6795T>C  | Verified   | CCT | ACT | CTA | 3 | T | C |
| TCGA-29-1777 | VCAN ENST00000265077           | p.S729S  | c.2187T>C  | Unverified | ACA | TCT | CTC | 3 | T | C |
| TCGA-29-1695 | VEZF1 ENST00000581208          | p.C179R  | c.535T>C   | Unverified | ATG | TGT | GGG | 1 | T | C |
| TCGA-29-1702 | VNN2 ENST00000326499           | p.L299L  | c.897T>C   | Unverified | AAA | CTT | CTC | 3 | T | C |



|              |           |                 |         |           |            |     |     |     |   |   |   |
|--------------|-----------|-----------------|---------|-----------|------------|-----|-----|-----|---|---|---|
| TCGA-29-1777 | WDPCP     | ENST00000272321 | p.I164T | c.491T>C  | Unverified | ACC | ATC | AGT | 2 | T | C |
| TCGA-30-1718 | WDR13     | ENST00000376729 | p.S330P | c.988T>C  | Unverified | TTC | TCT | TTC | 1 | T | C |
| TCGA-30-1718 | WDR13_EN  | ENST00000218056 | p.S330P | c.988T>C  | Unverified | TTC | TCT | TTC | 1 | T | C |
| TCGA-23-1032 | WDR17     | ENST00000280190 | p.I259T | c.776T>C  | Verified   | TGC | ATA | ACA | 2 | T | C |
| TCGA-30-1855 | WDR89     | ENST00000394942 | p.L346L | c.1036T>C | Unverified | TTG | TTA | CTT | 1 | T | C |
| TCGA-13-1497 | WFDC10B   | ENST00000330523 | p.I41T  | c.122T>C  | Verified   | AGC | ATA | GAT | 2 | T | C |
| TCGA-24-1435 | XG        | ENST00000381174 | p.M139T | c.416T>C  | Verified   | aat | atg | gta | 2 | T | C |
| TCGA-30-1718 | XIAP      | ENST00000434753 | p.I370T | c.1109T>C | Unverified | acc | atc | ttc | 2 | T | C |
| TCGA-23-1022 | XKR3      | ENST00000331428 | p.I219T | c.656T>C  | Verified   | GCC | ATC | CAG | 2 | T | C |
| TCGA-29-1693 | XKR3      | ENST00000331428 | p.M183T | c.548T>C  | Unverified | CAG | ATG | TAT | 2 | T | C |
| TCGA-29-1768 | XKR5      | ENST00000409172 | p.W79R  | c.235T>C  | Unverified | GTT | TGG | AAG | 1 | T | C |
| TCGA-23-1124 | XKR9      | ENST00000408926 | p.P320P | c.960T>C  | Verified   | ATA | CCT | ATC | 3 | T | C |
| TCGA-61-2009 | ZDBF2     | ENST00000374423 | p.D232D | c.696T>C  | Verified   | CCA | GAT | GGG | 3 | T | C |
| TCGA-61-1914 | ZDHHC17   | ENST00000426126 | p.L605P | c.1814T>C | Unverified | GGC | CTC | TTT | 2 | T | C |
| TCGA-13-0883 | ZEB1      | ENST00000320985 | p.A499A | c.1497T>C | Verified   | GTC | GCT | ACA | 3 | T | C |
| TCGA-24-2262 | ZFP14     | ENST00000270001 | p.I145I | c.435T>C  | Verified   | AAA | ATT | ACC | 3 | T | C |
| TCGA-13-0793 | ZFP57     | ENST00000376883 | p.F373F | c.1119T>C | Verified   | ACT | TTT | AGC | 3 | T | C |
| TCGA-09-2049 | ZFYVE26   | ENST00000347230 | p.F678F | c.2034T>C | Verified   | GGA | TTT | CTG | 3 | T | C |
| TCGA-13-0904 | ZG16B     | ENST00000382280 | p.S153P | c.457T>C  | Verified   | ATC | TCC | TCT | 1 | T | C |
| TCGA-61-1915 | ZMYM2     | ENST00000456228 | p.T254T | c.762T>C  | Unverified | AAG | ACT | GGA | 3 | T | C |
| TCGA-61-1915 | ZMYM2_EN  | ENST00000456228 | p.T254T | c.762T>C  | Unverified | AAG | ACT | GGA | 3 | T | C |
| TCGA-61-1915 | ZNF198    | ENST00000382869 | p.T254T | c.762T>C  | Unverified | AAG | ACT | GGA | 3 | T | C |
| TCGA-30-1718 | ZNF239    | ENST00000374446 | p.I27I  | c.81T>C   | Unverified | GAT | ATT | TCC | 3 | T | C |
| TCGA-04-1361 | ZNF304    | ENST00000282286 | p.Y217H | c.649T>C  | Verified   | GAC | TAT | GAT | 1 | T | C |
| TCGA-04-1361 | ZNF304    | ENST00000282286 | p.Y217H | c.649T>C  | Verified   | GAC | TAT | GAT | 1 | T | C |
| TCGA-13-1496 | ZNF334    | ENST00000347606 | p.S505S | c.1515T>C | Verified   | TGC | AGT | CAG | 3 | T | C |
| TCGA-23-1110 | ZNF365    | ENST00000395254 | p.Y102H | c.304T>C  | Verified   | TTG | TAC | AGC | 1 | T | C |
| TCGA-13-1505 | ZNF41     | ENST00000313116 | p.G694G | c.2082T>C | Verified   | tgt | ggt | gac | 3 | T | C |
| TCGA-61-1913 | ZNF417    | ENST00000312026 | p.C385R | c.1153T>C | Unverified | GAA | TGT | GGA | 1 | T | C |
| TCGA-30-1856 | ZNF43     | ENST00000354959 | p.L469L | c.1407T>C | Unverified | AAC | CTT | ACT | 3 | T | C |
| TCGA-24-2289 | ZNF438    | ENST00000361310 | p.I539T | c.1616T>C | Verified   | CGG | ATT | TGT | 2 | T | C |
| TCGA-61-1907 | ZNF451    | ENST00000357489 | p.I729T | c.2186T>C | Unverified | TAC | ATC | TGT | 2 | T | C |
| TCGA-61-1907 | ZNF451_EN | ENST00000370706 | p.I729T | c.2186T>C | Unverified | TAC | ATC | TGT | 2 | T | C |
| TCGA-23-1029 | ZNF462    | ENST00000277225 | p.G998G | c.2994T>C | Unverified | GGT | GGT | GGT | 3 | T | C |

|              |           |                 |          |            |            |     |     |     |   |   |   |
|--------------|-----------|-----------------|----------|------------|------------|-----|-----|-----|---|---|---|
| TCGA-09-1674 | ZNF551    | ENST00000282296 | p.S70P   | c.208T>C   | Unverified | GTA | TCT | ATA | 1 | T | C |
| TCGA-24-2280 | ZNF572    | ENST00000319286 | p.R339R  | c.1017T>C  | Unverified | AGT | CGT | AGT | 3 | T | C |
| TCGA-23-1022 | ZNF613    | ENST00000293471 | p.L585L  | c.1753T>C  | Verified   | TCA | TTA | ACT | 1 | T | C |
| TCGA-23-1122 | ZNF641    | ENST00000301042 | p.V146A  | c.437T>C   | Verified   | ATA | GTA | GTC | 2 | T | C |
| TCGA-25-2391 | ZNF654    | ENST00000309495 | p.P96P   | c.288T>C   | Unverified | ACA | CTT | ACT | 3 | T | C |
| TCGA-25-2391 | ZNF654_EN | ENST00000309495 | p.L204L  | c.612T>C   | Unverified | GCT | CTT | GGT | 3 | T | C |
| TCGA-61-2009 | ZNF70     | ENST00000341976 | p.I407T  | c.1220T>C  | Unverified | CTC | ATT | GAG | 2 | T | C |
| TCGA-24-1849 | ZNF701    | ENST00000391785 | p.L341L  | c.1023T>C  | Unverified | CAC | CTT | GAA | 3 | T | C |
| TCGA-13-1509 | ZNF711    | NM_021998.2     | p.S621P  | c.1861T>C  | Verified   | ata | tct | gtc | 1 | T | C |
| TCGA-29-1775 | ZNF76     | ENST00000373953 | p.D127D  | c.381T>C   | Unverified | GAT | GAT | GAG | 3 | T | C |
| TCGA-29-1691 | ZNF773    | ENST00000282292 | p.L39P   | c.116T>C   | Unverified | CTC | CTC | TAC | 2 | T | C |
| TCGA-61-1899 | ZNF778    | ENST00000433976 | p.L321P  | c.962T>C   | Unverified | GGA | CTC | TCA | 2 | T | C |
| TCGA-24-1104 | ZNF799    | ENST00000357979 | p.Y52H   | c.154T>C   | Verified   | GAT | TAC | AGT | 1 | T | C |
| TCGA-13-0920 | ZSCAN5B   | ENST00000358992 | p.N121N  | c.363T>C   | Verified   | CGA | AAT | AAC | 3 | T | C |
| TCGA-23-1022 | ZXDC      | ENST00000336332 | p.S331P  | c.991T>C   | Verified   | TGC | TCC | TTT | 1 | T | C |
| TCGA-29-1770 | AADAC     | ENST00000232892 | p.A308A  | c.924T>G   | Unverified | CTG | GCT | AAA | 3 | T | G |
| TCGA-30-1714 | ABCA13    | ENST00000319379 | p.T2043T | c.6129T>G  | Unverified | GAA | TAT | GCA | 3 | T | G |
| TCGA-30-1714 | ABCA13_EN | ENST00000435803 | p.T2098T | c.6294T>G  | Unverified | ATA | ACT | TTG | 3 | T | G |
| TCGA-04-1338 | ABCA9     | ENST00000340001 | p.F998L  | c.2994T>G  | Verified   | ATT | TTT | AAT | 3 | T | G |
| TCGA-24-1422 | ACAD10    | ENST00000313698 | p.F210C  | c.629T>G   | Verified   | ATC | TTT | CTT | 2 | T | G |
| TCGA-61-2009 | ACTR6     | ENST00000188312 | p.L270W  | c.809T>G   | Verified   | CGT | TTG | GCC | 2 | T | G |
| TCGA-61-1915 | ACTRT1    | ENST00000371124 | p.C286G  | c.856T>G   | Unverified | aag | tgt | gac | 1 | T | G |
| TCGA-61-1738 | ADAM17    | ENST00000310823 | p.I284S  | c.851T>G   | Unverified | CGC | ATT | CTC | 2 | T | G |
| TCGA-61-1738 | ADAM17    | ENST00000310823 | p.I284S  | c.851T>G   | Unverified | CGC | ATT | CTC | 2 | T | G |
| TCGA-25-2392 | ADAMTS17  | ENST00000268070 | p.L287R  | c.860T>G   | Verified   | CTG | CTA | CGA | 2 | T | G |
| TCGA-61-1910 | ADAMTS9   | ENST00000498707 | p.V628G  | c.1883T>G  | Unverified | tgt | gta | gga | 2 | T | G |
| TCGA-25-1326 | ADK       | ENST00000286621 | p.?      | c.194+2T>G | Verified   | gaa | ctg | ttt | 2 | T | G |
| TCGA-13-0920 | AHNAK     | ENST00000378024 | p.L5588V | c.16762T>G | Verified   | CAT | TTG | AGT | 1 | T | G |
| TCGA-61-1913 | AKAP12    | ENST00000402676 | p.G1027G | c.3081T>G  | Unverified | gaa | ggt | ggc | 3 | T | G |
| TCGA-13-0886 | ALDH3A1   | ENST00000225740 | p.V261G  | c.782T>G   | Verified   | att | gtg | gag | 2 | T | G |
| TCGA-29-1764 | ALKBH1    | ENST00000216489 | p.F101C  | c.302T>G   | Unverified | ATT | TTT | ATC | 2 | T | G |
| TCGA-29-1711 | AMHR2     | ENST00000257863 | p.P124P  | c.372T>G   | Unverified | ctg | cct | cct | 3 | T | G |
| TCGA-29-1711 | AMHR2     | ENST00000257863 | p.P124P  | c.372T>G   | Unverified | ctg | cct | cct | 3 | T | G |
| TCGA-61-2113 | ANK2      | ENST00000357077 | p.I536S  | c.1607T>G  | Unverified | CAC | ATC | TCT | 2 | T | G |

|              |           |                 |          |           |            |     |     |     |   |   |   |
|--------------|-----------|-----------------|----------|-----------|------------|-----|-----|-----|---|---|---|
| TCGA-24-1845 | ANK3      | ENST00000280772 | p.V1047G | c.3140T>G | Unverified | CTG | GTA | GAA | 2 | T | G |
| TCGA-24-1845 | ANK3_ENST | ENST00000355288 | p.V181G  | c.542T>G  | Unverified | CTG | GTA | GAA | 2 | T | G |
| TCGA-24-1845 | ANK3_ENST | ENST00000395293 | p.V682G  | c.2045T>G | Unverified | CTG | GTA | GAA | 2 | T | G |
| TCGA-04-1652 | ANKRD18B  | ENST00000290943 | p.I129M  | c.387T>G  | Unverified | AAC | ATT | AAG | 3 | T | G |
| TCGA-04-1652 | ANKRD18B  | ENST00000290943 | p.I129M  | c.387T>G  | Unverified | AAC | ATT | AAG | 3 | T | G |
| TCGA-13-1501 | ANKRD29   | ENST00000322980 | p.F101C  | c.302T>G  | Verified   | GGA | TTT | GGA | 2 | T | G |
| TCGA-13-1501 | ANKRD29   | ENST00000322980 | p.F101C  | c.302T>G  | Verified   | GGA | TTT | GGA | 2 | T | G |
| TCGA-24-1563 | ANKRD30A  | ENST00000361713 | p.L1017R | c.3050T>G | Verified   | GCT | CTC | AGA | 2 | T | G |
| TCGA-13-0893 | ANKRD30A  | ENST00000361713 | p.D270E  | c.810T>G  | Verified   | CCT | GAT | GAG | 3 | T | G |
| TCGA-24-1850 | ANKRD57   | ENST00000356454 | p.H441Q  | c.1323T>G | Unverified | CAC | CAT | CAC | 3 | T | G |
| TCGA-29-1691 | ANKS1A    | ENST00000360359 | p.L468V  | c.1402T>G | Unverified | GTG | TTG | GTG | 1 | T | G |
| TCGA-09-2049 | ANO10     | ENST00000292246 | p.S386A  | c.1156T>G | Verified   | ACT | TCA | TGG | 1 | T | G |
| TCGA-13-0887 | AOX1      | ENST00000374700 | p.L381V  | c.1141T>G | Verified   | AAC | TTG | CTA | 1 | T | G |
| TCGA-13-1481 | AP4B1     | ENST00000369569 | p.V156G  | c.467T>G  | Verified   | GAA | GTA | GAT | 2 | T | G |
| TCGA-09-2051 | APLF      | ENST00000303795 | p.C324G  | c.970T>G  | Verified   | AGC | TGT | TCT | 1 | T | G |
| TCGA-13-0885 | ARID5B    | ENST00000279873 | p.S304A  | c.910T>G  | Verified   | GTC | TCA | AAT | 1 | T | G |
| TCGA-30-1855 | ATP8A1    | ENST00000381668 | p.T413T  | c.1239T>G | Unverified | GGT | ACT | CTG | 3 | T | G |
| TCGA-30-1855 | ATP8A1_EN | ENST00000264449 | p.T413T  | c.1239T>G | Unverified | GGT | ACT | CTG | 3 | T | G |
| TCGA-04-1347 | AURKC     | ENST00000448930 | p.S227A  | c.679T>G  | Verified   | CTA | TCA | ATG | 1 | T | G |
| TCGA-13-1512 | AXL       | ENST00000359092 | p.C24G   | c.70T>G   | Verified   | GCG | TGC | ATG | 1 | T | G |
| TCGA-23-1032 | BAG5      | ENST00000299204 | p.V27G   | c.80T>G   | Verified   | caa | gtt | atc | 2 | T | G |
| TCGA-13-0886 | BANK1     | ENST00000322953 | p.N25K   | c.75T>G   | Verified   | GGA | AAT | ACA | 3 | T | G |
| TCGA-61-1904 | BDP1      | ENST00000358731 | p.S1915S | c.5745T>G | Unverified | GTT | TCT | GCT | 3 | T | G |
| TCGA-13-0890 | BOLL      | ENST00000392296 | p.S167A  | c.499T>G  | Verified   | AGC | TCC | CCT | 1 | T | G |
| TCGA-29-2427 | BRCA1     | ENST00000357654 | p.L431*  | c.1292T>G | Verified   | gac | tta | ctg | 2 | T | G |
| TCGA-61-1914 | BRCA1     | ENST00000357654 | p.L474*  | c.1421T>G | Unverified | aac | tta | agc | 2 | T | G |
| TCGA-13-1509 | BRDT      | ENST00000362005 | p.F172V  | c.514T>G  | Verified   | GTA | TTT | AAG | 1 | T | G |
| TCGA-24-1849 | BRDT      | ENST00000362005 | p.F373L  | c.1119T>G | Unverified | CAT | TTT | TCA | 3 | T | G |
| TCGA-23-1031 | C12orf40  | ENST00000324616 | p.C571G  | c.1711T>G | Verified   | CAG | TGC | AAT | 1 | T | G |
| TCGA-24-0975 | C12orf56  | ENST00000333722 | p.L348V  | c.1042T>G | Unverified | GGA | TTG | GGA | 1 | T | G |
| TCGA-13-0760 | C14orf102 | ENST00000354366 | p.W25G   | c.73T>G   | Verified   | GAC | TGG | CTG | 1 | T | G |
| TCGA-29-1776 | C17orf42  | ENST00000581216 | p.L164L  | c.492T>G  | Unverified | AGA | CTT | AAG | 3 | T | G |
| TCGA-13-0792 | C17orf75  | ENST00000225805 | p.Y345*  | c.1035T>G | Verified   | CAT | TAT | GCT | 3 | T | G |
| TCGA-13-0905 | C18orf1   | ENST00000361205 | p.I221S  | c.662T>G  | Verified   | gac | att | gct | 2 | T | G |

|              |             |                 |          |           |            |     |     |     |   |   |   |
|--------------|-------------|-----------------|----------|-----------|------------|-----|-----|-----|---|---|---|
| TCGA-61-1914 | C1orf101    | ENST00000366533 | p.L676L  | c.2028T>G | Unverified | GGT | CTT | GTG | 3 | T | G |
| TCGA-61-1914 | C1orf101_E1 | ENST00000366534 | p.L676L  | c.2028T>G | Unverified | GGT | CTT | GTG | 3 | T | G |
| TCGA-29-1770 | C20orf177   | ENST00000358293 | p.V171G  | c.512T>G  | Unverified | GCC | GTG | CCC | 2 | T | G |
| TCGA-04-1651 | C20orf194   | ENST00000252032 | p.F242C  | c.725T>G  | Unverified | AGC | TTC | TTC | 2 | T | G |
| TCGA-04-1651 | C20orf194   | ENST00000252032 | p.F242C  | c.725T>G  | Unverified | AGC | TTC | TTC | 2 | T | G |
| TCGA-24-1463 | C7orf28B    | ENST00000316731 | p.N94K   | c.282T>G  | Unverified | TTC | AAT | GAA | 3 | T | G |
| TCGA-09-2051 | CA3         | ENST00000285381 | p.S48S   | c.144T>G  | Unverified | TGG | TCT | GTG | 3 | T | G |
| TCGA-10-0930 | CALHM1      | ENST00000329905 | p.V115G  | c.344T>G  | Verified   | TGG | GTG | GCC | 2 | T | G |
| TCGA-10-0930 | CALHM1      | ENST00000329905 | p.V115G  | c.344T>G  | Verified   | TGG | GTG | GCC | 2 | T | G |
| TCGA-13-1512 | CCDC132_E1  | ENST00000305866 | p.L393R  | c.1178T>G | Verified   | CAG | CTA | AAA | 2 | T | G |
| TCGA-29-1761 | CCDC149     | ENST00000324309 | p.A105A  | c.315T>G  | Unverified | CGA | GCT | AAG | 3 | T | G |
| TCGA-29-1761 | CCDC149_E1  | ENST00000504487 | p.A160A  | c.480T>G  | Unverified | CGA | GCT | AAG | 3 | T | G |
| TCGA-13-0760 | CCDC18      | ENST00000334652 | p.I564S  | c.1691T>G | Verified   | AGA | ATT | AAG | 2 | T | G |
| TCGA-29-1764 | CCDC73      | ENST00000335185 | p.F451L  | c.1353T>G | Unverified | TCA | TTT | ATA | 3 | T | G |
| TCGA-61-2094 | CCDC73      | ENST00000335185 | p.P639P  | c.1917T>G | Unverified | AAT | CCT | GTT | 3 | T | G |
| TCGA-25-2393 | CCNT2       | ENST00000264157 | p.V603G  | c.1808T>G | Verified   | CCT | GTT | GGC | 2 | T | G |
| TCGA-61-1740 | CCR3        | ENST00000357422 | p.C294G  | c.880T>G  | Unverified | cac | tgc | tgc | 1 | T | G |
| TCGA-13-0885 | CD109       | ENST00000287097 | p.T1112T | c.3336T>G | Verified   | CTG | ACT | TGG | 3 | T | G |
| TCGA-13-1510 | CD86        | ENST00000330540 | p.L63V   | c.187T>G  | Unverified | AAC | TTG | GTT | 1 | T | G |
| TCGA-04-1337 | CDC27       | ENST00000066544 | p.V550G  | c.1649T>G | Unverified | GAT | GTT | GCT | 2 | T | G |
| TCGA-13-0919 | CDC27       | ENST00000066544 | p.D549E  | c.1647T>G | Unverified | AAA | GAT | GTT | 3 | T | G |
| TCGA-61-1914 | CDH11       | ENST00000268603 | p.F527C  | c.1580T>G | Unverified | AGA | TTT | ATC | 2 | T | G |
| TCGA-23-1111 | CDSN        | ENST00000376288 | p.S303S  | c.909T>G  | Unverified | TCC | TCT | GAC | 3 | T | G |
| TCGA-24-1847 | CEBPE       | ENST00000206513 | p.V200G  | c.599T>G  | Unverified | GCA | GTG | AAC | 2 | T | G |
| TCGA-04-1367 | CELSR1      | ENST00000262738 | p.W1958G | c.5872T>G | Unverified | TGG | TGG | GGG | 1 | T | G |
| TCGA-61-1907 | CERKL       | ENST00000410087 | p.F318C  | c.953T>G  | Unverified | CGC | TTT | GGG | 2 | T | G |
| TCGA-61-1907 | CERKL_ENST  | ENST00000339098 | p.F344C  | c.1031T>G | Unverified | CGC | TTT | GGG | 2 | T | G |
| TCGA-04-1347 | CHD7        | ENST00000423902 | p.L1229L | c.3687T>G | Verified   | TTT | CTT | TCC | 3 | T | G |
| TCGA-23-1022 | CHRM2       | ENST00000320658 | p.V95G   | c.284T>G  | Verified   | GTG | GTG | TGT | 2 | T | G |
| TCGA-61-1910 | CLCA1       | ENST00000234701 | p.S440A  | c.1318T>G | Unverified | CCC | TCT | GCA | 1 | T | G |
| TCGA-23-1032 | CLDN17      | ENST00000286808 | p.L167R  | c.500T>G  | Verified   | TTC | CTT | GGC | 2 | T | G |
| TCGA-23-1032 | CLUU1       | ENST00000378485 | p.S53A   | c.157T>G  | Verified   | TTT | TCT | CAA | 1 | T | G |
| TCGA-04-1655 | CLUAP1      | ENST00000576634 | p.L130R  | c.389T>G  | Unverified | GAT | CTT | GGC | 2 | T | G |
| TCGA-13-0887 | CMYA5       | ENST00000238522 | p.V1522G | c.4565T>G | Verified   | GAG | GTG | TTA | 2 | T | G |

|              |         |                 |          |            |            |     |     |     |   |   |   |
|--------------|---------|-----------------|----------|------------|------------|-----|-----|-----|---|---|---|
| TCGA-04-1356 | CNBD1   | ENST00000518476 | p.V194G  | c.581T>G   | Verified   | GTG | GTT | GCA | 2 | T | G |
| TCGA-24-1844 | COASY   | ENST00000393818 | p.F431C  | c.1292T>G  | Unverified | GTG | TTT | GGG | 2 | T | G |
| TCGA-09-1674 | COL4A5  | ENST00000361603 | p.G1309G | c.3927T>G  | Unverified | cag | ggt | aat | 3 | T | G |
| TCGA-24-1847 | COL5A3  | ENST00000264828 | p.R550R  | c.1650T>G  | Unverified | GAT | CGT | GGC | 3 | T | G |
| TCGA-25-1313 | COPE    | ENST00000262812 | p.V16G   | c.47T>G    | Unverified | GAG | GTA | GAC | 2 | T | G |
| TCGA-24-1422 | CPA6    | ENST00000297770 | p.I176S  | c.527T>G   | Unverified | TTT | ATT | TTA | 2 | T | G |
| TCGA-04-1338 | CREBBP  | ENST00000262367 | p.F1379V | c.4135T>G  | Verified   | CGG | TTT | GTG | 1 | T | G |
| TCGA-36-1577 | CSMD3   | ENST00000297405 | p.T2365T | c.7095T>G  | Verified   | agt | act | tca | 3 | T | G |
| TCGA-29-1691 | CTR9    | ENST00000361367 | p.L820V  | c.2458T>G  | Unverified | GAC | TTA | CTG | 1 | T | G |
| TCGA-30-1855 | CUL9    | ENST00000252050 | p.C1077G | c.3229T>G  | Unverified | TGC | TGC | CTG | 1 | T | G |
| TCGA-23-1117 | CUX1    | ENST00000292535 | p.R602R  | c.1806T>G  | Verified   | GTT | CGT | GGC | 3 | T | G |
| TCGA-23-1117 | CUX1    | ENST00000292535 | p.R602R  | c.1806T>G  | Verified   | GTT | CGT | GGC | 3 | T | G |
| TCGA-10-0930 | DAND5   | ENST00000317060 | p.L12R   | c.35T>G    | Verified   | TGC | CTG | CTT | 2 | T | G |
| TCGA-10-0930 | DAND5   | ENST00000317060 | p.L12R   | c.35T>G    | Verified   | TGC | CTG | CTT | 2 | T | G |
| TCGA-20-1686 | DBC1    | ENST00000373969 | p.S572A  | c.1714T>G  | Unverified | CAT | TCG | GAG | 1 | T | G |
| TCGA-23-1122 | DCLK2   | ENST00000296550 | p.C524W  | c.1572T>G  | Verified   | GTG | TGT | GAA | 3 | T | G |
| TCGA-04-1347 | DCST2   | ENST00000368424 | p.I390S  | c.1169T>G  | Verified   | TAC | ATC | CCA | 2 | T | G |
| TCGA-04-1331 | DDIT3   | ENST00000547303 | p.L25R   | c.74T>G    | Verified   | gac | ctg | caa | 2 | T | G |
| TCGA-13-0793 | DDO     | ENST00000368924 | p.I182R  | c.545T>G   | Unverified | AGG | ATA | AAG | 2 | T | G |
| TCGA-23-1022 | DENND2A | ENST00000275884 | p.S310A  | c.928T>G   | Verified   | TCC | TCT | CCC | 1 | T | G |
| TCGA-24-2024 | DENND4C | ENST00000380437 | p.I952M  | c.2856T>G  | Verified   | GGT | ATT | GCT | 3 | T | G |
| TCGA-20-1685 | DEPDC5  | ENST00000400248 | p.S681A  | c.2041T>G  | Unverified | ATG | TCC | TTC | 1 | T | G |
| TCGA-25-1326 | DHX34   | ENST00000328771 | p.F149L  | c.447T>G   | Verified   | gca | ttt | ggg | 3 | T | G |
| TCGA-61-1904 | DIAPH3  | ENST00000400324 | p.G584G  | c.1752T>G  | Unverified | TCT | GGT | GGA | 3 | T | G |
| TCGA-23-1032 | DLG5    | ENST00000372391 | p.I540S  | c.1619T>G  | Verified   | AGC | ATC | CGG | 2 | T | G |
| TCGA-09-2056 | DMXL2   | ENST00000251076 | p.I568R  | c.1703T>G  | Verified   | TGT | ATA | AAT | 2 | T | G |
| TCGA-29-1768 | DMXL2   | ENST00000251076 | p.L2971W | c.8912T>G  | Unverified | AGA | TTG | ACA | 2 | T | G |
| TCGA-13-0884 | DNAH3   | ENST00000261383 | p.C3478W | c.10434T>G | Verified   | CGA | TGT | TTG | 3 | T | G |
| TCGA-29-1691 | DNM3    | ENST00000358155 | p.H267Q  | c.801T>G   | Unverified | AGA | CAT | ATC | 3 | T | G |
| TCGA-20-1683 | DOPEY2  | ENST00000399151 | p.F2073C | c.6218T>G  | Unverified | ATG | TTT | CTT | 2 | T | G |
| TCGA-24-1846 | DPRX    | ENST00000376650 | p.L7R    | c.20T>G    | Unverified | GAT | CTT | CGT | 2 | T | G |
| TCGA-61-1998 | DUXA    | ENST00000554048 | p.F63C   | c.188T>G   | Verified   | TGG | TTT | CAG | 2 | T | G |
| TCGA-29-1768 | DYSF    | ENST00000258104 | p.I2048S | c.6143T>G  | Unverified | ATC | ATC | CTC | 2 | T | G |
| TCGA-61-1900 | DYSF    | ENST00000258104 | p.L2015R | c.6044T>G  | Unverified | AAG | CTT | GAG | 2 | T | G |

|              |            |                     |          |           |            |     |     |     |   |   |   |
|--------------|------------|---------------------|----------|-----------|------------|-----|-----|-----|---|---|---|
| TCGA-29-1768 | DYSF_ENSTC | ENST00000410020     | p.I2087S | c.6260T>G | Unverified | ATC | ATC | CTC | 2 | T | G |
| TCGA-61-1900 | DYSF_ENSTC | ENST00000410020     | p.L2054R | c.6161T>G | Unverified | AAG | CTT | GAG | 2 | T | G |
| TCGA-04-1356 | ECE1       | ENST00000374893     | p.F405V  | c.1213T>G | Verified   | TCC | TTC | CTT | 1 | T | G |
| TCGA-24-1844 | ECHDC2     | ENST00000358358     | p.I215M  | c.645T>G  | Unverified | GCC | ATT | GAC | 3 | T | G |
| TCGA-13-0791 | EDA        | ENST00000374552     | p.L42R   | c.125T>G  | Verified   | CTG | CTC | TTC | 2 | T | G |
| TCGA-24-2035 | EDEM1      | ENST00000256497     | p.V447G  | c.1340T>G | Verified   | CAG | GTG | CTG | 2 | T | G |
| TCGA-20-0991 | EHMT2      | ENST00000375537     | p.L618L  | c.1854T>G | Unverified | TGC | CTT | TCA | 3 | T | G |
| TCGA-13-0886 | EIF3M      | ENST00000531120     | p.R19R   | c.57T>G   | Verified   | CTT | CGT | GCT | 3 | T | G |
| TCGA-13-1497 | ENSG000000 | ENST00000308911     | p.V419G  | c.1256T>G | Verified   | CTG | GTG | TCT | 2 | T | G |
| TCGA-24-2280 | EOMES      | ENST00000295743     | p.Y679*  | c.2037T>G | Verified   | GGG | TAT | TAT | 3 | T | G |
| TCGA-29-1711 | EPM2A      | ENST00000367519     | p.W230G  | c.688T>G  | Unverified | ATC | TGG | ATG | 1 | T | G |
| TCGA-29-1711 | EPM2A      | ENST00000367519     | p.W230G  | c.688T>G  | Unverified | ATC | TGG | ATG | 1 | T | G |
| TCGA-13-0760 | ERC1       | ENST00000397203     | p.L1016L | c.3048T>G | Verified   | gaa | ctt | gac | 3 | T | G |
| TCGA-10-0930 | ERVFRD-1   | ENST00000472091     | p.I74S   | c.221T>G  | Verified   | CAT | ATT | TCC | 2 | T | G |
| TCGA-10-0930 | ERVFRD-1   | ENST00000472091     | p.I74S   | c.221T>G  | Verified   | CAT | ATT | TCC | 2 | T | G |
| TCGA-24-1103 | EXOC1      | ENST00000346134     | p.V709G  | c.2126T>G | Verified   | GGA | GTA | TTT | 2 | T | G |
| TCGA-13-0885 | EXOC3L1    | ENST00000314586     | p.I374M  | c.1122T>G | Verified   | AAC | ATT | GAG | 3 | T | G |
| TCGA-24-1469 | F2RL2      | ENST00000296641     | p.F6V    | c.16T>G   | Verified   | atc | ttt | gca | 1 | T | G |
| TCGA-13-1510 | FABP3      | ENST00000373713     | p.L6R    | c.17T>G   | Verified   | TTC | CTG | GGC | 2 | T | G |
| TCGA-25-2392 | FAHD1      | ENST00000427358     | p.L148R  | c.443T>G  | Unverified | AAG | CTC | TGG | 2 | T | G |
| TCGA-29-1763 | FAM105A    | ENST00000274217     | p.F149V  | c.445T>G  | Unverified | ATA | TTC | AGC | 1 | T | G |
| TCGA-30-1891 | FAM161A    | ENST00000307507     | p.D107E  | c.321T>G  | Unverified | AAA | GAT | ACT | 3 | T | G |
| TCGA-13-0885 | FAM20B     | ENST00000263733     | p.V87G   | c.260T>G  | Verified   | GCA | GTC | ATG | 2 | T | G |
| TCGA-23-1031 | FAM48B2    | XM_293352.4         | p.V630V  | c.1890T>G | Unverified | cag | gtt | ttg | 3 | T | G |
| TCGA-23-1111 | FAM53C     | ENST00000239906     | p.T283T  | c.849T>G  | Unverified | AAA | ACT | GGG | 3 | T | G |
| TCGA-61-1725 | FASTKD3    | ENST00000264669     | p.T395T  | c.1185T>G | Unverified | GAA | ACT | TTT | 3 | T | G |
| TCGA-13-1509 | FAT3_ENSTC | ENST00000298047_v61 | p.F2235V | c.6703T>G | Verified   | GAC | TTT | GAC | 1 | T | G |
| TCGA-09-2044 | FAT3_ENSTC | ENST00000298047_v61 | p.V870G  | c.2609T>G | Unverified | TCA | GTC | TTG | 2 | T | G |
| TCGA-09-2044 | FAT3_ENSTC | ENST00000409404     | p.V870G  | c.2609T>G | Unverified | TCA | GTC | TTG | 2 | T | G |
| TCGA-04-1331 | FCRL5      | ENST00000361835     | p.I66R   | c.197T>G  | Unverified | GAA | ATA | CTA | 2 | T | G |
| TCGA-13-0755 | FCRL5      | ENST00000361835     | p.A368A  | c.1104T>G | Verified   | AAG | GCT | GTG | 3 | T | G |
| TCGA-13-0893 | FER1L6     | ENST00000399018     | p.M331R  | c.992T>G  | Verified   | AGC | ATG | AAT | 2 | T | G |
| TCGA-09-2051 | FGD2       | ENST00000274963     | p.V375G  | c.1124T>G | Unverified | AAG | GTG | CGG | 2 | T | G |
| TCGA-29-1763 | FGF5       | ENST00000312465     | p.L101R  | c.302T>G  | Unverified | CAT | CTG | CAG | 2 | T | G |

|              |            |                 |          |           |            |     |     |     |   |   |   |
|--------------|------------|-----------------|----------|-----------|------------|-----|-----|-----|---|---|---|
| TCGA-61-2009 | FIGNL1     | ENST00000395556 | p.F440C  | c.1319T>G | Verified   | CTC | TTT | GGT | 2 | T | G |
| TCGA-24-1431 | FKBP10     | ENST00000321562 | p.S389S  | c.1167T>G | Verified   | CCA | TCT | GAG | 3 | T | G |
| TCGA-23-1031 | FNBP4      | ENST00000263773 | p.F543V  | c.1627T>G | Verified   | GAG | TTT | CTA | 1 | T | G |
| TCGA-29-1781 | FNIP2_ENST | ENST00000264433 | p.V865G  | c.2594T>G | Unverified | CTC | GTG | GCT | 2 | T | G |
| TCGA-13-1498 | FOSB       | ENST00000353609 | p.S114R  | c.342T>G  | Verified   | AGC | AGT | GGC | 3 | T | G |
| TCGA-13-1498 | FUT10      | ENST00000327671 | p.L315L  | c.945T>G  | Verified   | TGG | CTT | CCA | 3 | T | G |
| TCGA-29-1701 | GAD2       | ENST00000259271 | p.F330V  | c.988T>G  | Unverified | CCT | TTC | CTC | 1 | T | G |
| TCGA-10-0930 | GAPVD1     | ENST00000394105 | p.L540R  | c.1619T>G | Verified   | CAG | CTT | TCG | 2 | T | G |
| TCGA-10-0930 | GAPVD1     | ENST00000394105 | p.L540R  | c.1619T>G | Verified   | CAG | CTT | TCG | 2 | T | G |
| TCGA-61-1740 | GBP6       | ENST00000370456 | p.N18K   | c.54T>G   | Unverified | AAC | AAT | GAG | 3 | T | G |
| TCGA-24-0979 | GCC2       | ENST00000309863 | p.V645G  | c.1934T>G | Verified   | AAG | GTA | AAT | 2 | T | G |
| TCGA-09-2044 | GCFC1      | ENST00000331923 | p.S720A  | c.2158T>G | Verified   | CCT | TCA | GTA | 1 | T | G |
| TCGA-04-1338 | GCFC1      | ENST00000331923 | p.I219M  | c.657T>G  | Verified   | GAA | ATT | CCA | 3 | T | G |
| TCGA-61-1900 | GDA        | ENST00000358399 | p.D266E  | c.798T>G  | Unverified | tat | gat | aaa | 3 | T | G |
| TCGA-61-1900 | GDA_ENST0  | ENST00000238018 | p.D266E  | c.798T>G  | Unverified | TAT | GAT | AAA | 3 | T | G |
| TCGA-23-2078 | GHRH       | ENST00000373614 | p.V44G   | c.131T>G  | Verified   | AAG | GTG | CTG | 2 | T | G |
| TCGA-29-1761 | GJA8       | ENST00000369235 | p.T120T  | c.360T>G  | Unverified | GGG | ACT | AAC | 3 | T | G |
| TCGA-61-2095 | GLIS3      | ENST00000324333 | p.Y356D  | c.1066T>G | Unverified | CTG | TAC | GAC | 1 | T | G |
| TCGA-24-2267 | GPR112     | ENST00000394143 | p.V2871G | c.8612T>G | Verified   | agt | gtg | aaa | 2 | T | G |
| TCGA-61-2095 | GPR114     | ENST00000340339 | p.D144E  | c.432T>G  | Unverified | AAG | GAT | GAA | 3 | T | G |
| TCGA-13-0890 | GPR149     | ENST00000389740 | p.S268A  | c.802T>G  | Verified   | TGC | TCT | CCG | 1 | T | G |
| TCGA-13-1498 | GPRASP2    | ENST00000543253 | p.F508C  | c.1523T>G | Verified   | ggc | ttc | cga | 2 | T | G |
| TCGA-30-1855 | GRIA2      | ENST00000296526 | p.W481G  | c.1441T>G | Unverified | ATT | TGG | AAT | 1 | T | G |
| TCGA-30-1855 | GRIA2_ENST | ENST00000264426 | p.W481G  | c.1441T>G | Unverified | ATT | TGG | AAT | 1 | T | G |
| TCGA-30-1855 | GRIN2B     | ENST00000279593 | p.I365S  | c.1094T>G | Unverified | ATA | ATT | CTT | 2 | T | G |
| TCGA-13-0755 | GRM8       | ENST00000339582 | p.C64W   | c.192T>G  | Verified   | CCT | TGT | GGG | 3 | T | G |
| TCGA-61-1740 | GSPT1      | NM_002094.1     | p.L3R    | c.8T>G    | Unverified | gaa | ctt | tca | 2 | T | G |
| TCGA-61-1740 | GSPT1_ENST | ENST00000434724 | p.L141R  | c.422T>G  | Unverified | GAA | CTT | TCA | 2 | T | G |
| TCGA-13-1512 | GTF3C1     | ENST00000356183 | p.W145G  | c.433T>G  | Verified   | AGG | TGG | GGG | 1 | T | G |
| TCGA-29-1784 | HAT1       | ENST00000264108 | p.F202C  | c.605T>G  | Unverified | tac | ttt | cta | 2 | T | G |
| TCGA-29-1763 | hCG_38941  | ENST00000328828 | p.S51A   | c.151T>G  | Unverified | TCT | TCT | CCA | 1 | T | G |
| TCGA-09-1674 | HCRTR2     | ENST00000370862 | p.L108L  | c.324T>G  | Unverified | TGC | CTT | CCA | 3 | T | G |
| TCGA-04-1362 | HERC1      | ENST00000443617 | p.L3096* | c.9287T>G | Verified   | GAA | TTA | CTT | 2 | T | G |
| TCGA-61-1914 | HERC1      | ENST00000443617 | p.I616M  | c.1848T>G | Unverified | TTC | ATT | CGC | 3 | T | G |

|              |            |                     |          |            |            |     |     |     |   |   |   |
|--------------|------------|---------------------|----------|------------|------------|-----|-----|-----|---|---|---|
| TCGA-61-1914 | HERC1_ENS  | ENST00000443617     | p.I616M  | c.1848T>G  | Unverified | TTC | ATT | CGC | 3 | T | G |
| TCGA-13-0923 | HERC5      | NM_016323.1         | p.F793C  | c.2378T>G  | Verified   | ctg | ttt | aag | 2 | T | G |
| TCGA-24-1563 | HKDC1      | ENST00000354624     | p.Y587D  | c.1759T>G  | Verified   | GAC | TAC | ATG | 1 | T | G |
| TCGA-13-0900 | HRG        | ENST00000232003     | p.N137K  | c.411T>G   | Verified   | GCC | AAT | ACC | 3 | T | G |
| TCGA-29-1764 | HSPG2      | ENST00000374695     | p.F386V  | c.1156T>G  | Unverified | AGC | TTC | CAC | 1 | T | G |
| TCGA-23-1124 | HTR5A      | ENST00000287907     | p.C297G  | c.889T>G   | Verified   | CTC | TGC | TGG | 1 | T | G |
| TCGA-13-1497 | HTRA3      | ENST00000307358     | p.P396P  | c.1188T>G  | Verified   | TCA | CCT | TCT | 3 | T | G |
| TCGA-20-1687 | HYDIN_ENS  | ENST00000316490_v65 | p.Y3442D | c.10324T>G | Unverified | AAC | TAC | CAG | 1 | T | G |
| TCGA-24-1423 | IER2       | ENST00000292433     | p.G26G   | c.78T>G    | Unverified | cgc | ggt | ggc | 3 | T | G |
| TCGA-61-2113 | IFT140     | ENST00000426508     | p.W386G  | c.1156T>G  | Unverified | CAG | TGG | GGT | 1 | T | G |
| TCGA-61-1915 | IGF2BP3    | ENST00000258729     | p.T394T  | c.1182T>G  | Unverified | ATG | ACT | CCT | 3 | T | G |
| TCGA-04-1542 | IL12RB2    | ENST00000262345     | p.F99C   | c.296T>G   | Verified   | TTG | TTT | GTC | 2 | T | G |
| TCGA-13-0904 | IL17RA     | ENST00000319363     | p.V579G  | c.1736T>G  | Unverified | CAG | GTC | CGC | 2 | T | G |
| TCGA-29-1781 | IL26       | ENST00000229134     | p.L16R   | c.47T>G    | Unverified | ACT | CTG | TCT | 2 | T | G |
| TCGA-25-1318 | IRAK3      | ENST00000261233     | p.L421V  | c.1261T>G  | Verified   | TGT | TTG | GCA | 1 | T | G |
| TCGA-25-1318 | IRAK3      | ENST00000261233     | p.L421V  | c.1261T>G  | Verified   | TGT | TTG | GCA | 1 | T | G |
| TCGA-13-0886 | ISPD       | ENST00000407010     | p.M102R  | c.305T>G   | Verified   | AAC | ATG | GAA | 2 | T | G |
| TCGA-30-1718 | ITK        | ENST00000422843     | p.L254V  | c.760T>G   | Unverified | CTT | TTG | GAC | 1 | T | G |
| TCGA-61-1910 | ITPR2      | ENST00000381340     | p.S1126A | c.3376T>G  | Unverified | AAG | TCT | GAG | 1 | T | G |
| TCGA-13-0793 | JARID2     | ENST00000341776     | p.I557S  | c.1670T>G  | Unverified | gag | atc | ccc | 2 | T | G |
| TCGA-04-1342 | KATNB1     | ENST00000379661     | p.L326R  | c.977T>G   | Unverified | CCA | CTG | CCC | 2 | T | G |
| TCGA-24-1104 | KBTBD6     | ENST00000379485     | p.M494R  | c.1481T>G  | Verified   | CGC | ATG | TTC | 2 | T | G |
| TCGA-13-0791 | KCNE4      | ENST00000281830     | p.S131A  | c.391T>G   | Verified   | TCC | TCC | CCG | 1 | T | G |
| TCGA-24-1103 | KCNMA1     | ENST00000286627     | p.F213C  | c.638T>G   | Verified   | GAT | TTC | ACA | 2 | T | G |
| TCGA-09-2044 | KCNT2      | ENST00000294725     | p.C948W  | c.2844T>G  | Verified   | TTG | TGT | TCT | 3 | T | G |
| TCGA-13-1499 | KCTD3      | ENST00000259154     | p.F29C   | c.86T>G    | Verified   | AGA | TTT | AGT | 2 | T | G |
| TCGA-23-1124 | KDEL3      | ENST00000216014     | p.F194V  | c.580T>G   | Verified   | GAC | TTC | TTC | 1 | T | G |
| TCGA-61-1913 | KIAA0528   | ENST00000333957     | p.L521*  | c.1562T>G  | Unverified | CGC | TTA | AAA | 2 | T | G |
| TCGA-61-1913 | KIAA0528_E | ENST00000544930     | p.L336*  | c.1007T>G  | Unverified | CGC | TTA | AAA | 2 | T | G |
| TCGA-13-0760 | KIAA0922   | ENST00000361316     | p.V107V  | c.321T>G   | Verified   | GAT | GTT | TTG | 3 | T | G |
| TCGA-29-2427 | KIAA1404   | ENST00000396105     | p.F1453C | c.4358T>G  | Verified   | TGC | TTC | GAA | 2 | T | G |
| TCGA-13-0890 | KIAA1468   | ENST00000398130     | p.L290*  | c.869T>G   | Verified   | GAA | TTA | TGG | 2 | T | G |
| TCGA-13-0795 | KIAA1529   | ENST00000375206     | p.L887*  | c.2660T>G  | Verified   | TCC | TTA | AAC | 2 | T | G |
| TCGA-23-1122 | KIF2C      | ENST00000372224     | p.I56M   | c.168T>G   | Verified   | GAG | ATT | GAT | 3 | T | G |



|              |            |                 |          |            |            |     |     |     |   |   |   |
|--------------|------------|-----------------|----------|------------|------------|-----|-----|-----|---|---|---|
| TCGA-24-2280 | KIR3DL3    | ENST00000291860 | p.I326M  | c.978T>G   | Unverified | CTG | ATT | GGG | 3 | T | G |
| TCGA-24-1464 | KMO        | ENST00000366559 | p.S392A  | c.1174T>G  | Verified   | CCA | TCG | ACC | 1 | T | G |
| TCGA-04-1655 | KRTAP5-6   | ENST00000382160 | p.C125G  | c.373T>G   | Unverified | TGC | TGC | CAG | 1 | T | G |
| TCGA-61-1904 | L1CAM      | ENST00000370060 | p.V850G  | c.2549T>G  | Unverified | AAT | GTG | ACG | 2 | T | G |
| TCGA-61-1914 | L1TD1      | ENST00000498273 | p.Y713D  | c.2137T>G  | Unverified | AGT | TAT | GAG | 1 | T | G |
| TCGA-23-2078 | L3MBTL2    | ENST00000216237 | p.S115A  | c.343T>G   | Unverified | TGC | TCC | AGG | 1 | T | G |
| TCGA-04-1356 | LARP7      | ENST00000324052 | p.S413A  | c.1237T>G  | Verified   | GAG | TCA | GAA | 1 | T | G |
| TCGA-25-2400 | LAS1L      | ENST00000374811 | p.C256G  | c.766T>G   | Unverified | cat | tgc | aaa | 1 | T | G |
| TCGA-13-0913 | LCE2C      | ENST00000368783 | p.L73R   | c.218T>G   | Unverified | TCC | CTG | AGC | 2 | T | G |
| TCGA-29-1770 | LCN12      | ENST00000371633 | p.L48R   | c.143T>G   | Unverified | GGC | CTG | GCG | 2 | T | G |
| TCGA-61-1915 | LIPI       | ENST00000344577 | p.V227G  | c.680T>G   | Unverified | TTT | GTG | GAT | 2 | T | G |
| TCGA-23-1022 | LMNA       | ENST00000368300 | p.V256G  | c.767T>G   | Verified   | cag | gtg | gag | 2 | T | G |
| TCGA-13-0885 | LOC283849  | ENST00000314586 | p.I374M  | c.1122T>G  | Verified   | AAC | ATT | GAG | 3 | T | G |
| TCGA-20-1687 | LOC652153  | ENST00000316490 | p.Y3394D | c.10180T>G | Unverified | AAC | TAC | CAG | 1 | T | G |
| TCGA-24-2262 | LPCAT1     | ENST00000283415 | p.Y138D  | c.412T>G   | Unverified | TCC | TAC | TTC | 1 | T | G |
| TCGA-61-1910 | LRCH2      | NM_020871.2     | p.M205R  | c.614T>G   | Unverified | tta | atg | gaa | 2 | T | G |
| TCGA-61-1910 | LRCH2_ENS1 | ENST00000317135 | p.M205R  | c.614T>G   | Unverified | TTA | ATG | GAA | 2 | T | G |
| TCGA-13-0904 | LRIG2      | ENST00000361127 | p.S1062R | c.3186T>G  | Verified   | GGT | AGT | GAG | 3 | T | G |
| TCGA-61-1913 | LRP1B      | ENST00000389484 | p.I262S  | c.785T>G   | Unverified | TGT | ATC | CAG | 2 | T | G |
| TCGA-13-0920 | LRP2       | ENST00000263816 | p.C3519G | c.10555T>G | Verified   | CTG | TGC | GCT | 1 | T | G |
| TCGA-29-1701 | LRPPRC     | ENST00000260665 | p.F1372C | c.4115T>G  | Unverified | CCT | TTC | ATT | 2 | T | G |
| TCGA-23-1032 | LRRC4C     | ENST00000278198 | p.G15G   | c.45T>G    | Verified   | ATA | GGT | CCT | 3 | T | G |
| TCGA-61-1895 | LRRC58     | ENST00000295628 | p.L287L  | c.861T>G   | Unverified | CTT | CTT | AGA | 3 | T | G |
| TCGA-61-1740 | LRRCC1     | ENST00000360375 | p.S687S  | c.2061T>G  | Unverified | TCC | TCT | TTA | 3 | T | G |
| TCGA-61-1740 | LRRCC1_EN5 | ENST00000414626 | p.S667S  | c.2001T>G  | Unverified | TCC | TCT | TTA | 3 | T | G |
| TCGA-61-1910 | LRRK2      | SU_LRRK2        | p.F671L  | c.2013T>G  | Unverified | tca | ttt | gac | 3 | T | G |
| TCGA-61-1910 | LRRK2_ENS1 | ENST00000298910 | p.F671L  | c.2013T>G  | Unverified | TCA | TTT | GAC | 3 | T | G |
| TCGA-13-0913 | LYG2       | ENST00000333017 | p.P79P   | c.237T>G   | Verified   | AAA | CCT | TAC | 3 | T | G |
| TCGA-61-2095 | MAPKAPK3_  | ENST00000446044 | p.V39G   | c.116T>G   | Unverified | GCA | GTG | ACC | 2 | T | G |
| TCGA-29-1761 | MATN3      | ENST00000407540 | p.L82W   | c.245T>G   | Unverified | CCC | TTG | GAC | 2 | T | G |
| TCGA-29-1777 | MCM3AP     | ENST00000397708 | p.S1466R | c.4398T>G  | Unverified | aag | agt | gag | 3 | T | G |
| TCGA-29-1777 | MDGA2      | ENST00000357362 | p.V440G  | c.1319T>G  | Unverified | ATT | GTT | GCA | 2 | T | G |
| TCGA-29-1777 | MDGA2_EN1  | ENST00000399232 | p.V738G  | c.2213T>G  | Unverified | ATT | GTT | GCA | 2 | T | G |
| TCGA-29-1777 | MDGA2_EN1  | ENST00000426342 | p.V440G  | c.1319T>G  | Unverified | ATT | GTT | GCA | 2 | T | G |

|              |            |                 |          |           |            |     |     |     |   |   |   |
|--------------|------------|-----------------|----------|-----------|------------|-----|-----|-----|---|---|---|
| TCGA-13-1509 | MDM1       | ENST00000303145 | p.S68S   | c.204T>G  | Verified   | AAA | TCT | CTG | 3 | T | G |
| TCGA-13-0755 | MET        | ENST00000318493 | p.L1223W | c.3668T>G | Unverified | GAC | TTG | GCT | 2 | T | G |
| TCGA-61-2109 | METTL15    | ENST00000303459 | p.S60A   | c.178T>G  | Unverified | AGA | TCT | CAA | 1 | T | G |
| TCGA-23-1116 | MFSD7      | ENST00000322224 | p.W88G   | c.262T>G  | Unverified | ATC | TGG | ATC | 1 | T | G |
| TCGA-23-2078 | MGAT4C     | ENST00000332156 | p.I103M  | c.309T>G  | Unverified | ACA | ATT | GGA | 3 | T | G |
| TCGA-61-2109 | MGRN1      | ENST00000262370 | p.L60R   | c.179T>G  | Unverified | GAT | CTG | AAC | 2 | T | G |
| TCGA-04-1338 | MLL3       | ENST00000262189 | p.S2971A | c.8911T>G | Verified   | AAT | TCT | AAT | 1 | T | G |
| TCGA-13-0807 | MNDA       | ENST00000368141 | p.L65R   | c.194T>G  | Verified   | AAA | CTA | ATA | 2 | T | G |
| TCGA-29-1776 | MON2       | ENST00000393632 | p.F1266V | c.3796T>G | Unverified | ACT | TTT | ATT | 1 | T | G |
| TCGA-09-0369 | MRAS       | ENST00000289104 | p.I136S  | c.407T>G  | Verified   | AAG | ATC | ACC | 2 | T | G |
| TCGA-09-0369 | MRAS       | ENST00000289104 | p.I136S  | c.407T>G  | Verified   | AAG | ATC | ACC | 2 | T | G |
| TCGA-29-1761 | MRGPRX2    | ENST00000329773 | p.F76V   | c.226T>G  | Unverified | GAC | TTC | CTC | 1 | T | G |
| TCGA-61-1737 | MS4A8B     | ENST00000300226 | p.L86R   | c.257T>G  | Unverified | GGC | CTC | GGC | 2 | T | G |
| TCGA-24-2280 | MSI2       | ENST00000322684 | p.F40C   | c.119T>G  | Unverified | AAA | TTT | GGA | 2 | T | G |
| TCGA-61-2094 | MYBPC1     | ENST00000361466 | p.D1120E | c.3360T>G | Unverified | TAT | GAT | GGA | 3 | T | G |
| TCGA-61-2109 | MYH11      | ENST00000338282 | p.L639R  | c.1916T>G | Unverified | TCG | CTG | CCC | 2 | T | G |
| TCGA-13-1507 | MYH4       | ENST00000255381 | p.F483V  | c.1447T>G | Verified   | AAC | TTC | ACC | 1 | T | G |
| TCGA-09-1674 | MYLK       | NM_053025       | p.L195R  | c.584T>G  | Unverified | tgg | ctc | aag | 2 | T | G |
| TCGA-24-1845 | MYO9A      | ENST00000356056 | p.F1822C | c.5465T>G | Unverified | GAA | TTC | AAA | 2 | T | G |
| TCGA-13-0913 | MYPN       | ENST00000358913 | p.S1038R | c.3114T>G | Verified   | CAA | AGT | TTG | 3 | T | G |
| TCGA-13-1481 | MYT1L      | ENST00000399161 | p.S237R  | c.711T>G  | Verified   | GAT | AGT | GAC | 3 | T | G |
| TCGA-04-1542 | NALCN      | ENST00000251127 | p.S100R  | c.300T>G  | Verified   | GAT | AGT | TCC | 3 | T | G |
| TCGA-24-1844 | NBEAL1     | ENST00000388944 | p.S1320S | c.3960T>G | Unverified | CTG | TCT | ATA | 3 | T | G |
| TCGA-24-1844 | NBEAL1_EN! | ENST00000449802 | p.S2610S | c.7830T>G | Unverified | CTG | TCT | ATA | 3 | T | G |
| TCGA-13-0924 | NCOA2      | ENST00000452400 | p.L1206R | c.3617T>G | Verified   | cca | ctt | atg | 2 | T | G |
| TCGA-24-1849 | NETO1      | ENST00000327305 | p.C351G  | c.1051T>G | Unverified | TCC | TGC | ATC | 1 | T | G |
| TCGA-04-1649 | NETO1      | ENST00000327305 | p.L338R  | c.1013T>G | Unverified | CAG | CTG | ACC | 2 | T | G |
| TCGA-13-0900 | NHS        | ENST00000380060 | p.S556R  | c.1668T>G | Verified   | tta | agt | gag | 3 | T | G |
| TCGA-61-1740 | NLRC5      | ENST00000262510 | p.L1263R | c.3788T>G | Unverified | TGC | CTT | CTG | 2 | T | G |
| TCGA-04-1336 | NOP2       | ENST00000399466 | p.S146S  | c.438T>G  | Verified   | AAC | TCT | GAG | 3 | T | G |
| TCGA-24-2289 | NOTCH3     | ENST00000263388 | p.M1704R | c.5111T>G | Unverified | GGC | ATG | AAG | 2 | T | G |
| TCGA-10-0930 | NPC1       | ENST00000269228 | p.F998C  | c.2993T>G | Verified   | AGA | TTC | CTG | 2 | T | G |
| TCGA-10-0930 | NPC1       | ENST00000269228 | p.F998C  | c.2993T>G | Verified   | AGA | TTC | CTG | 2 | T | G |
| TCGA-04-1367 | NPHP1      | ENST00000316534 | p.I273R  | c.818T>G  | Verified   | CTA | ATA | GTT | 2 | T | G |

|              |           |                 |          |           |            |     |     |     |   |   |   |
|--------------|-----------|-----------------|----------|-----------|------------|-----|-----|-----|---|---|---|
| TCGA-04-1362 | NR2F1     | ENST00000327111 | p.V380G  | c.1139T>G | Verified   | acc | gtg | tcc | 2 | T | G |
| TCGA-61-1913 | NRAS      | ENST00000369535 | p.Y32*   | c.96T>G   | Unverified | gaa | tat | gat | 3 | T | G |
| TCGA-30-1856 | NRG1      | ENST00000356819 | p.T137T  | c.411T>G  | Unverified | ATC | ACT | GGT | 3 | T | G |
| TCGA-30-1856 | NRG1_ENST | ENST00000521670 | p.T137T  | c.411T>G  | Unverified | ATC | ACT | GGT | 3 | T | G |
| TCGA-61-1907 | O3FAR1    | ENST00000371483 | p.Y263D  | c.787T>G  | Unverified | GCC | TAC | TCG | 1 | T | G |
| TCGA-30-1857 | ODZ2_ENST | ENST00000518659 | p.N2197K | c.6591T>G | Unverified | GCC | AAT | ACC | 3 | T | G |
| TCGA-30-1857 | ODZ2_ENST | ENST00000519204 | p.N2076K | c.6228T>G | Unverified | GCC | AAT | ACC | 3 | T | G |
| TCGA-30-1855 | OR1S2     | ENST00000302592 | p.M297R  | c.890T>G  | Unverified | CCC | ATG | ATG | 2 | T | G |
| TCGA-13-1507 | OR2C3     | ENST00000366487 | p.L212R  | c.635T>G  | Verified   | CCT | CTG | GGG | 2 | T | G |
| TCGA-29-1762 | OR2D2     | ENST00000299459 | p.V158G  | c.473T>G  | Unverified | GTG | GTA | GAC | 2 | T | G |
| TCGA-30-1855 | OR2T2     | ENST00000342927 | p.V251V  | c.753T>G  | Unverified | AGC | GTT | TTC | 3 | T | G |
| TCGA-29-1703 | OR4A16    | ENST00000314721 | p.P19P   | c.57T>G   | Unverified | GAT | CCT | GAT | 3 | T | G |
| TCGA-20-0990 | OR4X1     | ENST00000320048 | p.F60V   | c.178T>G  | Verified   | TTC | TTT | CTC | 1 | T | G |
| TCGA-20-1683 | OR51A7    | ENST00000359350 | p.I92S   | c.275T>G  | Unverified | GGA | ATT | TCA | 2 | T | G |
| TCGA-23-1124 | OR51B2    | ENST00000328813 | p.R174R  | c.522T>G  | Verified   | ACA | CGT | GCT | 3 | T | G |
| TCGA-23-1022 | OR5AS1    | ENST00000313555 | p.T279T  | c.837T>G  | Verified   | TAT | ACT | GTT | 3 | T | G |
| TCGA-13-0760 | OR5D18    | ENST00000333976 | p.F62L   | c.186T>G  | Verified   | TAC | TTT | TTC | 3 | T | G |
| TCGA-24-2267 | OR6C1     | ENST00000379668 | p.S146S  | c.438T>G  | Verified   | ACT | TCT | TGG | 3 | T | G |
| TCGA-24-1470 | OR8H2     | ENST00000313503 | p.Y149D  | c.445T>G  | Verified   | CCT | TAT | GTG | 1 | T | G |
| TCGA-04-1638 | OR8K5     | ENST00000313447 | p.F277L  | c.831T>G  | Unverified | GTG | TTT | TAC | 3 | T | G |
| TCGA-23-1120 | OTOF      | ENST00000272371 | p.L152R  | c.455T>G  | Verified   | GGA | CTG | CTC | 2 | T | G |
| TCGA-10-0930 | OTUD4     | ENST00000454497 | p.S974A  | c.2920T>G | Verified   | AGA | TCC | AAG | 1 | T | G |
| TCGA-10-0930 | OTUD4     | ENST00000454497 | p.S974A  | c.2920T>G | Verified   | AGA | TCC | AAG | 1 | T | G |
| TCGA-24-1463 | P2RX1     | ENST00000225538 | p.L392R  | c.1175T>G | Verified   | GGC | CTG | CAG | 2 | T | G |
| TCGA-13-0920 | P2RY13    | ENST00000325602 | p.I195M  | c.585T>G  | Verified   | TGT | GCT | TCC | 3 | T | G |
| TCGA-24-0975 | PABPC3    | ENST00000281589 | p.L69R   | c.206T>G  | Verified   | GCT | CTG | GAC | 2 | T | G |
| TCGA-13-0887 | PAPPA2    | ENST00000367662 | p.C903W  | c.2709T>G | Verified   | GTG | TGT | GAC | 3 | T | G |
| TCGA-25-1326 | PARP10    | ENST00000313028 | p.V430G  | c.1289T>G | Verified   | CCT | GTG | AGC | 2 | T | G |
| TCGA-13-0883 | PAX3      | ENST00000392069 | p.S364A  | c.1090T>G | Verified   | TTT | TCC | AGC | 1 | T | G |
| TCGA-24-2267 | PAXIP1    | NM_007349.2     | p.N341K  | c.1023T>G | Verified   | gtg | aat | cac | 3 | T | G |
| TCGA-36-1577 | PCDH20    | ENST00000358674 | p.V496G  | c.1487T>G | Unverified | AAA | GTG | CAA | 2 | T | G |
| TCGA-24-2290 | PCDHB12   | ENST00000239450 | p.L503R  | c.1508T>G | Verified   | TCC | CTG | GTC | 2 | T | G |
| TCGA-24-2290 | PCDHB12   | ENST00000239450 | p.L503R  | c.1508T>G | Verified   | TCC | CTG | GTC | 2 | T | G |
| TCGA-30-1718 | PCDHB2    | ENST00000194155 | p.L631R  | c.1892T>G | Unverified | AGG | CTG | CTG | 2 | T | G |

|              |           |                 |          |            |            |     |     |     |   |   |   |
|--------------|-----------|-----------------|----------|------------|------------|-----|-----|-----|---|---|---|
| TCGA-24-1103 | PCDHGA12  | ENST00000252085 | p.V895G  | c.2684T>G  | Verified   | AAT | GTC | TAC | 2 | T | G |
| TCGA-24-1103 | PCDHGA12_ | ENST00000252085 | p.V895G  | c.2684T>G  | Verified   | AAT | GTC | TAC | 2 | T | G |
| TCGA-13-1481 | PCDHGA5   | ENST00000518069 | p.S754A  | c.2260T>G  | Verified   | TAT | TCC | CAC | 1 | T | G |
| TCGA-13-1499 | PCDHGA5   | ENST00000518069 | p.G468G  | c.1404T>G  | Verified   | AGA | GGT | GTC | 3 | T | G |
| TCGA-24-1103 | PCDHGB7   | ENST00000398594 | p.V892G  | c.2675T>G  | Verified   | AAT | GTC | TAC | 2 | T | G |
| TCGA-24-1103 | PCDHGC3   | ENST00000308177 | p.V897G  | c.2690T>G  | Verified   | AAT | GTC | TAC | 2 | T | G |
| TCGA-24-1103 | PCDHGC3_E | ENST00000308177 | p.V897G  | c.2690T>G  | Verified   | AAT | GTC | TAC | 2 | T | G |
| TCGA-24-1103 | PCDHGC4   | ENST00000306593 | p.V901G  | c.2702T>G  | Verified   | AAT | GTC | TAC | 2 | T | G |
| TCGA-24-1103 | PCDHGC5   | ENST00000252087 | p.V907G  | c.2720T>G  | Verified   | AAT | GTC | TAC | 2 | T | G |
| TCGA-24-1103 | PCDHGC5_E | ENST00000252087 | p.V907G  | c.2720T>G  | Verified   | AAT | GTC | TAC | 2 | T | G |
| TCGA-24-0979 | PDE10A    | ENST00000366882 | p.M403R  | c.1208T>G  | Verified   | AAA | ATG | TTT | 2 | T | G |
| TCGA-24-2262 | PDP1      | ENST00000297598 | p.I518S  | c.1553T>G  | Verified   | gac | att | aca | 2 | T | G |
| TCGA-09-0369 | PDZD2     | ENST00000282493 | p.S552R  | c.1656T>G  | Verified   | TCC | AGT | GCC | 3 | T | G |
| TCGA-09-0369 | PDZD2     | ENST00000282493 | p.S552R  | c.1656T>G  | Verified   | TCC | AGT | GCC | 3 | T | G |
| TCGA-61-1740 | PFDN5     | ENST00000551018 | p.L12R   | c.35T>G    | Unverified | aat | ctg | ccg | 2 | T | G |
| TCGA-61-1740 | PI4KB     | ENST00000368875 | p.I411S  | c.1232T>G  | Unverified | CTG | ATT | TAT | 2 | T | G |
| TCGA-29-1770 | PIGG      | ENST00000310340 | p.L793V  | c.2377T>G  | Unverified | GGA | TTA | GTT | 1 | T | G |
| TCGA-24-1435 | PIK3CB    | ENST00000477593 | p.I512M  | c.1536T>G  | Verified   | att | att | gaa | 3 | T | G |
| TCGA-04-1362 | PKD1L1    | ENST00000289672 | p.L1304R | c.3911T>G  | Verified   | AGC | CTG | AAA | 2 | T | G |
| TCGA-25-2400 | PKD1L1    | ENST00000289672 | p.V608G  | c.1823T>G  | Verified   | AGT | GTG | GCC | 2 | T | G |
| TCGA-13-1498 | PKHD1     | ENST00000371117 | p.L4044V | c.12130T>G | Verified   | AGC | TTG | GGG | 1 | T | G |
| TCGA-09-1674 | PKHD1     | ENST00000371117 | p.L3496W | c.10487T>G | Unverified | CTC | TTG | GCT | 2 | T | G |
| TCGA-09-2056 | PKHD1L1   | ENST00000378402 | p.L3404* | c.10211T>G | Verified   | GAT | TTA | AGT | 2 | T | G |
| TCGA-04-1342 | PLCB2     | ENST00000260402 | p.L1168R | c.3503T>G  | Unverified | GAG | CTG | TGT | 2 | T | G |
| TCGA-13-1498 | PLCG2     | ENST00000359376 | p.Y1036D | c.3106T>G  | Verified   | GGC | TAC | GTT | 1 | T | G |
| TCGA-24-2288 | PLCH1     | ENST00000334686 | p.C686G  | c.2056T>G  | Unverified | AAT | TGT | GGC | 1 | T | G |
| TCGA-61-1913 | PLCL2     | ENST00000418129 | p.S493S  | c.1479T>G  | Unverified | CTG | TCT | GAA | 3 | T | G |
| TCGA-23-1118 | PLD5      | ENST00000366545 | p.I250S  | c.749T>G   | Verified   | TAC | ATC | GCT | 2 | T | G |
| TCGA-24-2289 | POF1B     | ENST00000262753 | p.S291A  | c.871T>G   | Unverified | GAG | TCT | ACA | 1 | T | G |
| TCGA-13-1507 | PPP2R5C   | ENST00000334743 | p.S447R  | c.1341T>G  | Verified   | tat | agt | caa | 3 | T | G |
| TCGA-25-1326 | PRDM12    | ENST00000253008 | p.V127G  | c.380T>G   | Unverified | CAC | GTG | GAC | 2 | T | G |
| TCGA-24-1103 | PRKD3     | ENST00000379066 | p.F150V  | c.448T>G   | Verified   | GAC | TTC | CAG | 1 | T | G |
| TCGA-24-1103 | PRMT8     | ENST00000382622 | p.M247R  | c.740T>G   | Verified   | GAC | ATG | ACC | 2 | T | G |
| TCGA-25-1318 | PROCA1    | ENST00000301039 | p.L236W  | c.707T>G   | Verified   | CAG | TTG | ACT | 2 | T | G |

|              |           |                 |          |           |            |     |     |     |   |   |   |
|--------------|-----------|-----------------|----------|-----------|------------|-----|-----|-----|---|---|---|
| TCGA-25-1318 | PROCA1    | ENST00000301039 | p.L236W  | c.707T>G  | Verified   | CAG | TTG | ACT | 2 | T | G |
| TCGA-23-1124 | PROKR1    | ENST00000303786 | p.M332R  | c.995T>G  | Verified   | GCC | ATG | AGC | 2 | T | G |
| TCGA-13-0807 | PROM2     | ENST00000317668 | p.V54V   | c.162T>G  | Verified   | CGA | GTT | CGT | 3 | T | G |
| TCGA-61-1904 | PRPF38A   | ENST00000257181 | p.L54V   | c.160T>G  | Unverified | GAG | TTA | AGG | 1 | T | G |
| TCGA-20-1687 | PRRG3     | ENST00000538575 | p.A229A  | c.687T>G  | Unverified | GGC | GCT | GAC | 3 | T | G |
| TCGA-20-1685 | PRUNE2_EN | ENST00000376718 | p.L2398W | c.7193T>G | Unverified | GAT | TTG | TCT | 2 | T | G |
| TCGA-24-1469 | PSME4     | NM_014614.1     | p.Y1172D | c.3514T>G | Verified   | gtt | tat | gct | 1 | T | G |
| TCGA-30-1718 | PTGES2    | ENST00000338961 | p.V318G  | c.953T>G  | Unverified | GCT | GTG | GGC | 2 | T | G |
| TCGA-24-1469 | PTPN3     | ENST00000394831 | p.F578C  | c.1733T>G | Verified   | ATG | TTC | ATC | 2 | T | G |
| TCGA-61-2113 | R3HDM2    | ENST00000393811 | p.I593S  | c.1778T>G | Unverified | ACC | ATT | GTG | 2 | T | G |
| TCGA-29-1698 | RAB36     | ENST00000263116 | p.V147G  | c.440T>G  | Unverified | aat | gtt | ttt | 2 | T | G |
| TCGA-13-0883 | RABGAP1L  | ENST00000251507 | p.D52E   | c.156T>G  | Verified   | GGT | GAT | GAA | 3 | T | G |
| TCGA-29-1764 | RANBP17   | ENST00000523189 | p.Y378*  | c.1134T>G | Unverified | CAT | TAT | TTA | 3 | T | G |
| TCGA-30-1714 | RASA1     | ENST00000274376 | p.S936S  | c.2808T>G | Unverified | aaa | tct | gtg | 3 | T | G |
| TCGA-30-1714 | RASA1_ENS | ENST00000456692 | p.S759S  | c.2277T>G | Unverified | AAA | TCT | GTG | 3 | T | G |
| TCGA-24-1469 | RB1CC1    | ENST00000025008 | p.S253S  | c.759T>G  | Verified   | GAA | TCT | TTG | 3 | T | G |
| TCGA-61-2113 | RCC1      | ENST00000398958 | p.Y323D  | c.967T>G  | Verified   | gag | tat | ggg | 1 | T | G |
| TCGA-29-1705 | RCOR1     | ENST00000570597 | p.G442G  | c.1326T>G | Unverified | CAT | GGT | AAA | 3 | T | G |
| TCGA-24-1435 | RELN      | ENST00000343529 | p.D1479E | c.4437T>G | Verified   | AAC | GAT | GGC | 3 | T | G |
| TCGA-23-2078 | RGAG4     | XM_291322.3     | p.L338W  | c.1013T>G | Unverified | ttc | ttg | tct | 2 | T | G |
| TCGA-24-1104 | RGS18     | ENST00000367460 | p.S66S   | c.198T>G  | Verified   | aga | tct | ggg | 3 | T | G |
| TCGA-20-1685 | RGS21     | ENST00000417209 | p.L105R  | c.314T>G  | Unverified | ACA | CTC | AAA | 2 | T | G |
| TCGA-04-1347 | RING1     | ENST00000374656 | p.I110S  | c.329T>G  | Verified   | aag | atc | tat | 2 | T | G |
| TCGA-24-2267 | RINT1     | ENST00000257700 | p.S193S  | c.579T>G  | Verified   | GTG | TCT | ATG | 3 | T | G |
| TCGA-04-1530 | RNASE11   | ENST00000398008 | p.L189R  | c.566T>G  | Verified   | TCT | CTG | ATG | 2 | T | G |
| TCGA-23-1117 | RNF20     | ENST00000389120 | p.V365G  | c.1094T>G | Verified   | aag | gtg | gaa | 2 | T | G |
| TCGA-23-1117 | RNF20     | ENST00000389120 | p.V365G  | c.1094T>G | Verified   | aag | gtg | gaa | 2 | T | G |
| TCGA-13-0920 | RNF216    | ENST00000389902 | p.F235V  | c.703T>G  | Verified   | tac | ttc | cag | 1 | T | G |
| TCGA-29-1777 | ROBO1     | ENST00000464233 | p.I78S   | c.233T>G  | Unverified | CTG | ATT | GTC | 2 | T | G |
| TCGA-29-1777 | ROBO1_ENS | ENST00000464233 | p.I78S   | c.233T>G  | Unverified | CTG | ATT | GTC | 2 | T | G |
| TCGA-29-1777 | ROBO1_ENS | ENST00000464233 | p.I78S   | c.233T>G  | Unverified | CTG | ATT | GTC | 2 | T | G |
| TCGA-29-1777 | ROBO1_ENS | ENST00000495273 | p.I39S   | c.116T>G  | Unverified | CTG | ATT | GTC | 2 | T | G |
| TCGA-23-1111 | RP1       | ENST00000220676 | p.P86P   | c.258T>G  | Unverified | ACC | CCT | CGG | 3 | T | G |
| TCGA-25-2392 | RPAP3     | ENST00000005386 | p.S121A  | c.361T>G  | Verified   | GAG | TCG | GAA | 1 | T | G |

|              |             |                 |          |           |            |     |     |     |   |   |   |
|--------------|-------------|-----------------|----------|-----------|------------|-----|-----|-----|---|---|---|
| TCGA-61-1904 | RPS6KL1     | SU_SK473        | p.V197G  | c.590T>G  | Unverified | gga | gtc | ccc | 2 | T | G |
| TCGA-24-2035 | RS1         | ENST00000379984 | p.S196A  | c.586T>G  | Verified   | atc | tcc | cgc | 1 | T | G |
| TCGA-25-1313 | RSPH10B     | ENST00000337579 | p.M550R  | c.1649T>G | Unverified | TCT | ATG | AGT | 2 | T | G |
| TCGA-13-0793 | RUSC1       | ENST00000292254 | p.V114G  | c.341T>G  | Verified   | CAG | GTC | AGC | 2 | T | G |
| TCGA-04-1338 | SAMD12      | ENST00000314727 | p.L119R  | c.356T>G  | Verified   | AAG | CTC | GAG | 2 | T | G |
| TCGA-24-1844 | SCN8A       | ENST00000354534 | p.L1037W | c.3110T>G | Unverified | GAG | TTG | TAT | 2 | T | G |
| TCGA-24-1844 | SCN8A_ENS   | ENST00000354534 | p.L1037W | c.3110T>G | Unverified | GAG | TTG | TAT | 2 | T | G |
| TCGA-25-1326 | SCRIB       | ENST00000356994 | p.D122E  | c.366T>G  | Unverified | CCT | GAT | GGC | 3 | T | G |
| TCGA-13-0792 | SCUBE2      | ENST00000309263 | p.C671W  | c.2013T>G | Verified   | ACT | TGT | GAA | 3 | T | G |
| TCGA-24-1104 | SEMA6A      | ENST00000343348 | p.A16A   | c.48T>G   | Verified   | TTT | GCT | GGG | 3 | T | G |
| TCGA-29-1763 | SH2D7       | ENST00000328828 | p.S187A  | c.559T>G  | Unverified | TCT | TCT | CCA | 1 | T | G |
| TCGA-04-1342 | SH3PXD2B    | ENST00000311601 | p.S725A  | c.2173T>G | Verified   | ATT | TCC | TGC | 1 | T | G |
| TCGA-23-1032 | SHMT1       | ENST00000316694 | p.F475V  | c.1423T>G | Verified   | CTC | TTC | CCT | 1 | T | G |
| TCGA-61-2113 | SHPRH       | ENST00000438092 | p.I914R  | c.2741T>G | Unverified | CAA | ATA | CCA | 2 | T | G |
| TCGA-24-1844 | SI          | ENST00000264382 | p.W832G  | c.2494T>G | Unverified | TTC | TGG | GAT | 1 | T | G |
| TCGA-24-2289 | SIGLEC10    | ENST00000339313 | p.F548V  | c.1642T>G | Unverified | GCA | TTC | TCC | 1 | T | G |
| TCGA-24-2289 | SIGLEC12_EI | ENST00000439889 | p.F490V  | c.1468T>G | Unverified | GCA | TTC | TCC | 1 | T | G |
| TCGA-20-0991 | SIX4        | ENST00000216513 | p.S290A  | c.868T>G  | Verified   | GAG | TCA | GAT | 1 | T | G |
| TCGA-23-1029 | SKIV2L      | ENST00000375394 | p.S584A  | c.1750T>G | Unverified | GCC | TCA | GGC | 1 | T | G |
| TCGA-23-1029 | SKIV2L_ENS  | ENST00000375394 | p.S584A  | c.1750T>G | Unverified | GCC | TCA | GGC | 1 | T | G |
| TCGA-24-2288 | SLC10A1     | ENST00000216540 | p.L94V   | c.280T>G  | Unverified | ATC | TTG | GTC | 1 | T | G |
| TCGA-04-1361 | SLC12A2     | ENST00000262461 | p.L657V  | c.1969T>G | Verified   | ATC | TTA | ACA | 1 | T | G |
| TCGA-04-1361 | SLC12A2     | ENST00000262461 | p.L657V  | c.1969T>G | Verified   | ATC | TTA | ACA | 1 | T | G |
| TCGA-24-1474 | SLC17A2     | ENST00000360488 | p.L293R  | c.878T>G  | Verified   | ATC | CTA | ACA | 2 | T | G |
| TCGA-24-1103 | SLC26A7     | ENST00000276609 | p.M123R  | c.368T>G  | Verified   | AAC | ATG | CAG | 2 | T | G |
| TCGA-24-2280 | SLC2A14     | ENST00000396589 | p.L451V  | c.1351T>G | Unverified | TAT | TTA | GGA | 1 | T | G |
| TCGA-24-1470 | SLC30A1     | ENST00000367001 | p.F294L  | c.882T>G  | Verified   | GCA | TTT | GTA | 3 | T | G |
| TCGA-29-1769 | SLC30A2     | ENST00000374276 | p.V257G  | c.770T>G  | Unverified | TTC | GTC | TTC | 2 | T | G |
| TCGA-20-1687 | SLC30A8     | ENST00000456015 | p.H318Q  | c.954T>G  | Unverified | GCT | CAT | GTT | 3 | T | G |
| TCGA-24-1422 | SLC35C1     | ENST00000314134 | p.F78V   | c.232T>G  | Unverified | ACC | TTC | TAC | 1 | T | G |
| TCGA-24-2288 | SLC38A4     | ENST00000266579 | p.L222L  | c.666T>G  | Unverified | TAT | CTT | GGC | 3 | T | G |
| TCGA-29-1766 | SLC39A7     | ENST00000374675 | p.L436V  | c.1306T>G | Unverified | GTG | TTG | CCC | 1 | T | G |
| TCGA-29-1693 | SLC44A4     | ENST00000229729 | p.S407A  | c.1219T>G | Unverified | ACA | TCA | TGC | 1 | T | G |
| TCGA-29-1763 | SLC6A15     | ENST00000266682 | p.F320C  | c.959T>G  | Unverified | GCC | TTT | TCA | 2 | T | G |

|              |         |                 |          |             |            |     |     |     |   |   |   |
|--------------|---------|-----------------|----------|-------------|------------|-----|-----|-----|---|---|---|
| TCGA-23-1124 | SLC6A3  | ENST00000270349 | p.L138R  | c.413T>G    | Verified   | ATA | CTG | AAA | 2 | T | G |
| TCGA-61-1740 | SLC9A11 | ENST00000367714 | p.L284R  | c.851T>G    | Unverified | GGA | CTG | AAT | 2 | T | G |
| TCGA-30-1857 | SLFNL1  | ENST00000359345 | p.V85G   | c.254T>G    | Unverified | GAA | GTG | GTG | 2 | T | G |
| TCGA-09-2050 | SLIT1   | ENST00000266058 | p.?      | c.1157+2T>G | Verified   | CTC | CTG | CTC | 2 | T | G |
| TCGA-61-1740 | SLIT1   | ENST00000266058 | p.F177C  | c.530T>G    | Unverified | GCC | TTC | CGT | 2 | T | G |
| TCGA-24-2280 | SMPD1   | ENST00000299397 | p.S556S  | c.1668T>G   | Unverified | CTC | TCT | GCC | 3 | T | G |
| TCGA-20-1686 | SNUPN   | ENST00000308588 | p.F152V  | c.454T>G    | Unverified | AGG | TTT | TCT | 1 | T | G |
| TCGA-24-0975 | SPAM1   | ENST00000340011 | p.F6C    | c.17T>G     | Verified   | AAA | TTC | AAG | 2 | T | G |
| TCGA-20-1686 | SPANXN2 | ENST00000370498 | p.V34G   | c.101T>G    | Unverified | AGG | GTC | TTA | 2 | T | G |
| TCGA-13-1497 | SPATA7  | ENST00000393545 | p.T103T  | c.309T>G    | Verified   | TTA | ACT | AAA | 3 | T | G |
| TCGA-20-0990 | SPDYA   | ENST00000296122 | p.N42K   | c.126T>G    | Verified   | GAT | AAT | TGG | 3 | T | G |
| TCGA-13-0761 | SPEN    | ENST00000375759 | p.S635R  | c.1905T>G   | Verified   | gag | agt | gtt | 3 | T | G |
| TCGA-13-0761 | SPEN    | ENST00000375759 | p.S635R  | c.1905T>G   | Verified   | gag | agt | gtt | 3 | T | G |
| TCGA-13-0755 | SPOCD1  | ENST00000360482 | p.M695R  | c.2084T>G   | Verified   | CGG | ATG | AGC | 2 | T | G |
| TCGA-23-1022 | SPTA1   | ENST00000368148 | p.A2325A | c.6975T>G   | Verified   | GAT | GCT | GTG | 3 | T | G |
| TCGA-13-0884 | SRRM4   | ENST00000267260 | p.L504R  | c.1511T>G   | Verified   | CAC | CTG | GAG | 2 | T | G |
| TCGA-24-2289 | SRSF4   | ENST00000373795 | p.S478S  | c.1434T>G   | Unverified | AGG | TCT | GCT | 3 | T | G |
| TCGA-13-0923 | ST14    | ENST00000278742 | p.S254A  | c.760T>G    | Unverified | GAC | TCA | GTG | 1 | T | G |
| TCGA-23-1022 | ST8SIA6 | ENST00000377602 | p.L267R  | c.800T>G    | Verified   | TTT | CTT | CTG | 2 | T | G |
| TCGA-13-0906 | STAB2   | ENST00000388887 | p.L2397R | c.7190T>G   | Unverified | ACC | CTG | CAA | 2 | T | G |
| TCGA-24-2267 | STXBP4  | ENST00000376352 | p.N2K    | c.6T>G      | Verified   | ATG | AAT | AAA | 3 | T | G |
| TCGA-13-1489 | STXBP5L | ENST00000273666 | p.S1121R | c.3363T>G   | Verified   | GGT | AGT | ATA | 3 | T | G |
| TCGA-24-1423 | STXBP5L | ENST00000273666 | p.I426M  | c.1278T>G   | Verified   | TTG | ATT | CTA | 3 | T | G |
| TCGA-29-1762 | SUCNR1  | ENST00000362032 | p.P282P  | c.846T>G    | Unverified | CGG | CCT | TTG | 3 | T | G |
| TCGA-23-1120 | SVEP1   | ENST00000401783 | p.C1342W | c.4026T>G   | Verified   | CGA | TGT | GGA | 3 | T | G |
| TCGA-25-1313 | SVEP1   | ENST00000401783 | p.C373W  | c.1119T>G   | Verified   | ACC | TGT | GAA | 3 | T | G |
| TCGA-04-1362 | SYDE2   | ENST00000234668 | p.S344A  | c.1030T>G   | Verified   | GAC | TCA | CTG | 1 | T | G |
| TCGA-13-0795 | SYNCRIP | ENST00000369622 | p.G528G  | c.1584T>G   | Verified   | GGA | GGT | CCT | 3 | T | G |
| TCGA-09-2056 | SYNE2   | ENST00000358025 | p.L4928R | c.14783T>G  | Verified   | TCC | CTG | AAC | 2 | T | G |
| TCGA-30-1855 | SYNE2   | ENST00000358025 | p.F5296C | c.15887T>G  | Unverified | CGA | TTC | TGG | 2 | T | G |
| TCGA-13-0887 | SYNE2   | ENST00000358025 | p.S6377S | c.19131T>G  | Verified   | GAT | TCT | TGG | 3 | T | G |
| TCGA-13-0890 | SYT17   | ENST00000355377 | p.F190V  | c.568T>G    | Verified   | CAC | TTC | AGC | 1 | T | G |
| TCGA-09-2049 | TACR1   | ENST00000305249 | p.S378A  | c.1132T>G   | Verified   | CCC | TCG | TCC | 1 | T | G |
| TCGA-13-0900 | TAF1    | ENST00000373790 | p.L1717R | c.5150T>G   | Verified   | ttg | ctt | atg | 2 | T | G |

|              |            |                 |          |           |            |     |     |     |   |   |   |
|--------------|------------|-----------------|----------|-----------|------------|-----|-----|-----|---|---|---|
| TCGA-09-2050 | TCTE1      | ENST00000371505 | p.L314W  | c.941T>G  | Verified   | GAC | TTG | TCA | 2 | T | G |
| TCGA-09-2049 | TDRD10     | ENST00000368480 | p.H190Q  | c.570T>G  | Verified   | ATC | CAT | AGC | 3 | T | G |
| TCGA-13-0884 | TET1       | ENST00000373644 | p.P1207P | c.3621T>G | Verified   | TTT | CCT | ACT | 3 | T | G |
| TCGA-29-1763 | TFDP1      | ENST00000375370 | p.I231S  | c.692T>G  | Unverified | caa | att | gcc | 2 | T | G |
| TCGA-24-1846 | TFRC       | ENST00000360110 | p.T518T  | c.1554T>G | Unverified | GTT | ACT | GGG | 3 | T | G |
| TCGA-13-1512 | THSD7A     | ENST00000423059 | p.P190P  | c.570T>G  | Verified   | ATT | CCT | TGC | 3 | T | G |
| TCGA-29-1705 | TIAM1      | ENST00000286827 | p.S483A  | c.1447T>G | Unverified | AGG | TCT | GGG | 1 | T | G |
| TCGA-29-1705 | TIAM1_ENS  | ENST00000286827 | p.S483A  | c.1447T>G | Unverified | AGG | TCT | GGG | 1 | T | G |
| TCGA-23-1122 | TIAM2      | ENST00000318981 | p.C28G   | c.82T>G   | Unverified | CCT | TGC | TCC | 1 | T | G |
| TCGA-30-1855 | TIMELESS   | ENST00000553532 | p.F297C  | c.890T>G  | Unverified | ATC | TTT | CAC | 2 | T | G |
| TCGA-24-2035 | TINAG      | ENST00000259782 | p.C351G  | c.1051T>G | Verified   | CAA | TGT | TCT | 1 | T | G |
| TCGA-13-0887 | TM2D1      | ENST00000371180 | p.S72S   | c.216T>G  | Verified   | CCG | TCT | GCT | 3 | T | G |
| TCGA-29-1777 | TM9SF1     | ENST00000261789 | p.F552V  | c.1654T>G | Unverified | GTT | TTC | TAT | 1 | T | G |
| TCGA-24-2262 | TMEM168    | ENST00000312814 | p.P551P  | c.1653T>G | Verified   | ACC | CCT | TGG | 3 | T | G |
| TCGA-23-2078 | TMEM50B    | ENST00000420455 | p.L140L  | c.420T>G  | Verified   | GCA | CTT | ATA | 3 | T | G |
| TCGA-24-1423 | TMPRSS9    | ENST00000332578 | p.L144V  | c.430T>G  | Verified   | CCC | TTG | GCA | 1 | T | G |
| TCGA-61-1910 | TNFSF18    | NM_005092.2     | p.L96V   | c.286T>G  | Unverified | tat | tta | att | 1 | T | G |
| TCGA-04-1652 | TP53       | ENST00000269305 | p.C176G  | c.526T>G  | Unverified | CGC | TGC | CCC | 1 | T | G |
| TCGA-04-1652 | TP53       | ENST00000269305 | p.C176G  | c.526T>G  | Unverified | CGC | TGC | CCC | 1 | T | G |
| TCGA-13-0906 | TP53       | ENST00000269305 | p.F134V  | c.400T>G  | Verified   | ATG | TTT | TGC | 1 | T | G |
| TCGA-61-1725 | TP53       | ENST00000269305 | p.S241A  | c.721T>G  | Unverified | AGT | TCC | TGC | 1 | T | G |
| TCGA-24-2290 | TP53       | ENST00000269305 | p.V274G  | c.821T>G  | Verified   | CGT | GTT | TGT | 2 | T | G |
| TCGA-24-2290 | TP53       | ENST00000269305 | p.V274G  | c.821T>G  | Verified   | CGT | GTT | TGT | 2 | T | G |
| TCGA-25-1313 | TP53       | ENST00000269305 | p.L145R  | c.434T>G  | Verified   | CAG | CTG | TGG | 2 | T | G |
| TCGA-25-2401 | TP53       | ENST00000269305 | p.L194R  | c.581T>G  | Verified   | CAT | CTT | ATC | 2 | T | G |
| TCGA-30-1891 | TP53       | ENST00000269305 | p.L194R  | c.581T>G  | Verified   | CAT | CTT | ATC | 2 | T | G |
| TCGA-13-0924 | TP53       | ENST00000269305 | p.F270L  | c.810T>G  | Verified   | AGC | TTT | GAG | 3 | T | G |
| TCGA-61-1998 | TP53       | ENST00000269305 | p.S215R  | c.645T>G  | Verified   | CAT | AGT | GTG | 3 | T | G |
| TCGA-04-1652 | TP53_ENSTC | ENST00000269305 | p.C176G  | c.526T>G  | Unverified | CGC | TGC | CCC | 1 | T | G |
| TCGA-04-1652 | TP53_ENSTC | ENST00000269305 | p.C176G  | c.526T>G  | Unverified | CGC | TGC | CCC | 1 | T | G |
| TCGA-61-1725 | TP53_ENSTC | ENST00000269305 | p.S241A  | c.721T>G  | Unverified | AGT | TCC | TGC | 1 | T | G |
| TCGA-30-1891 | TP53_ENSTC | ENST00000269305 | p.L194R  | c.581T>G  | Verified   | CAT | CTT | ATC | 2 | T | G |
| TCGA-04-1652 | TP53_ENSTC | ENST00000413465 | p.C176G  | c.526T>G  | Unverified | CGC | TGC | CCC | 1 | T | G |
| TCGA-04-1652 | TP53_ENSTC | ENST00000413465 | p.C176G  | c.526T>G  | Unverified | CGC | TGC | CCC | 1 | T | G |



|              |            |                 |           |            |            |     |     |     |   |   |   |
|--------------|------------|-----------------|-----------|------------|------------|-----|-----|-----|---|---|---|
| TCGA-61-1725 | TP53_ENSTC | ENST00000413465 | p.S241A   | c.721T>G   | Unverified | AGT | TCC | TGC | 1 | T | G |
| TCGA-30-1891 | TP53_ENSTC | ENST00000413465 | p.L194R   | c.581T>G   | Verified   | CAT | CTT | ATC | 2 | T | G |
| TCGA-04-1652 | TP53_ENSTC | ENST00000414315 | p.C44G    | c.130T>G   | Unverified | CGC | TGC | CCC | 1 | T | G |
| TCGA-04-1652 | TP53_ENSTC | ENST00000414315 | p.C44G    | c.130T>G   | Unverified | CGC | TGC | CCC | 1 | T | G |
| TCGA-30-1891 | TP53_ENSTC | ENST00000414315 | p.L62R    | c.185T>G   | Verified   | CAT | CTT | ATC | 2 | T | G |
| TCGA-04-1652 | TP53_ENSTC | ENST00000545858 | p.C83G    | c.247T>G   | Unverified | CGC | TGC | CCC | 1 | T | G |
| TCGA-04-1652 | TP53_ENSTC | ENST00000545858 | p.C83G    | c.247T>G   | Unverified | CGC | TGC | CCC | 1 | T | G |
| TCGA-61-1725 | TP53_ENSTC | ENST00000545858 | p.S148A   | c.442T>G   | Unverified | AGT | TCC | TGC | 1 | T | G |
| TCGA-30-1891 | TP53_ENSTC | ENST00000545858 | p.L101R   | c.302T>G   | Verified   | CAT | CTT | ATC | 2 | T | G |
| TCGA-13-0793 | TRAF1      | ENST00000373887 | p.F265V   | c.793T>G   | Unverified | tcc | ttc | gat | 1 | T | G |
| TCGA-13-0755 | TRMU       | ENST00000290846 | p.V144V   | c.432T>G   | Verified   | CAC | GTT | AAG | 3 | T | G |
| TCGA-24-1417 | TRPV3      | ENST00000576742 | p.F601V   | c.1801T>G  | Verified   | GGA | TTT | GGA | 1 | T | G |
| TCGA-13-0903 | TSC2       | ENST00000219476 | p.Y1608D  | c.4822T>G  | Verified   | ACC | TAC | TGC | 1 | T | G |
| TCGA-13-0903 | TSC2_ENST0 | ENST00000219476 | p.Y1608D  | c.4822T>G  | Verified   | ACC | TAC | TGC | 1 | T | G |
| TCGA-29-1766 | TSHZ3_ENST | ENST00000240587 | p.W167G   | c.499T>G   | Unverified | GAC | TGG | CAC | 1 | T | G |
| TCGA-13-1488 | TSPAN6     | ENST00000373020 | p.T184T   | c.552T>G   | Verified   | tgt | act | cca | 3 | T | G |
| TCGA-25-2392 | TTN        | NM_003319       | p.V7769G  | c.23306T>G | Verified   | gga | gtt | ggc | 2 | T | G |
| TCGA-29-1761 | TTN        | NM_003319       | p.V7722G  | c.23165T>G | Unverified | tat | gtc | att | 2 | T | G |
| TCGA-23-1117 | TTN        | NM_003319       | p.F1512L  | c.4536T>G  | Verified   | atg | ttt | gta | 3 | T | G |
| TCGA-23-1117 | TTN        | NM_003319       | p.F1512L  | c.4536T>G  | Verified   | atg | ttt | gta | 3 | T | G |
| TCGA-29-1761 | TTN_ENST0( | ENST00000342175 | p.V7914G  | c.23741T>G | Unverified | TAT | GTC | ATT | 2 | T | G |
| TCGA-29-1761 | TTN_ENST0( | ENST00000342992 | p.V14219G | c.42656T>G | Unverified | TAT | GTC | ATT | 2 | T | G |
| TCGA-13-0795 | TTN_ENST0( | ENST00000356127 | p.Y5390D  | c.16168T>G | Verified   | CTC | TAC | TCA | 1 | T | G |
| TCGA-13-0795 | TTN_ENST0( | ENST00000356127 | p.L5389R  | c.16166T>G | Verified   | AAT | CTC | TAC | 2 | T | G |
| TCGA-25-2392 | TTN_ENST0( | ENST00000356127 | p.V14266G | c.42797T>G | Verified   | GGA | GTT | GGC | 2 | T | G |
| TCGA-29-1761 | TTN_ENST0( | ENST00000356127 | p.V14219G | c.42656T>G | Unverified | TAT | GTC | ATT | 2 | T | G |
| TCGA-23-1117 | TTN_ENST0( | ENST00000356127 | p.F1558L  | c.4674T>G  | Verified   | ATG | TTT | GTA | 3 | T | G |
| TCGA-23-1117 | TTN_ENST0( | ENST00000356127 | p.F1558L  | c.4674T>G  | Verified   | ATG | TTT | GTA | 3 | T | G |
| TCGA-29-1761 | TTN_ENST0( | ENST00000359218 | p.V7847G  | c.23540T>G | Unverified | TAT | GTC | ATT | 2 | T | G |
| TCGA-23-1117 | TTN_ENST0( | ENST00000360870 | p.F1558L  | c.4674T>G  | Verified   | ATG | TTT | GTA | 3 | T | G |
| TCGA-23-1117 | TTN_ENST0( | ENST00000360870 | p.F1558L  | c.4674T>G  | Verified   | ATG | TTT | GTA | 3 | T | G |
| TCGA-25-2400 | TXNDC17    | ENST00000250101 | p.P102P   | c.306T>G   | Verified   | ACA | CCT | CAA | 3 | T | G |
| TCGA-61-1737 | TXNRD2     | ENST00000400521 | p.V460G   | c.1379T>G  | Unverified | CTG | GTG | CTG | 2 | T | G |
| TCGA-61-1737 | UBE3C      | ENST00000348165 | p.V184G   | c.551T>G   | Unverified | cct | ggt | tta | 2 | T | G |

|              |            |                 |          |           |            |     |     |     |   |   |   |
|--------------|------------|-----------------|----------|-----------|------------|-----|-----|-----|---|---|---|
| TCGA-13-1505 | UBQLN2     | ENST00000338222 | p.A28A   | c.84T>G   | Unverified | CCG | GCT | GAG | 3 | T | G |
| TCGA-04-1338 | UIMC1      | ENST00000377227 | p.S343R  | c.1029T>G | Unverified | GCT | AGT | GAG | 3 | T | G |
| TCGA-13-0904 | USP14      | ENST00000261601 | p.S241R  | c.723T>G  | Verified   | aaa | agt | tta | 3 | T | G |
| TCGA-61-2102 | UTRN       | ENST00000367545 | p.D954E  | c.2862T>G | Verified   | CTT | GAT | GAA | 3 | T | G |
| TCGA-24-1849 | WDR31      | ENST00000374193 | p.P227P  | c.681T>G  | Unverified | TTT | CCT | GCA | 3 | T | G |
| TCGA-13-0913 | WDR60      | ENST00000407559 | p.F267V  | c.799T>G  | Verified   | CAT | TTT | GAT | 1 | T | G |
| TCGA-10-0930 | WRN        | ENST00000298139 | p.I631M  | c.1893T>G | Verified   | gat | att | aaa | 3 | T | G |
| TCGA-10-0930 | WRN        | ENST00000298139 | p.I631M  | c.1893T>G | Verified   | gat | att | aaa | 3 | T | G |
| TCGA-29-1703 | XPNPEP1    | ENST00000369680 | p.I144S  | c.431T>G  | Unverified | CTC | ATT | CCT | 2 | T | G |
| TCGA-29-1703 | XPNPEP1_EI | ENST00000502935 | p.I187S  | c.560T>G  | Unverified | CTC | ATT | CCT | 2 | T | G |
| TCGA-24-0975 | XRCC3      | ENST00000554913 | p.I12M   | c.36T>G   | Unverified | aga | att | att | 3 | T | G |
| TCGA-13-0795 | YBEY       | ENST00000397691 | p.I91M   | c.273T>G  | Verified   | GAC | ATT | TTC | 3 | T | G |
| TCGA-61-2012 | ZBTB41     | ENST00000367405 | p.I168R  | c.503T>G  | Verified   | ATT | ATA | GAT | 2 | T | G |
| TCGA-24-1423 | ZFC3H1     | ENST00000378743 | p.I1697M | c.5091T>G | Verified   | TTT | ATT | GCA | 3 | T | G |
| TCGA-13-0900 | ZFH3       | ENST00000268489 | p.L3126R | c.9377T>G | Unverified | TTG | CTC | CCG | 2 | T | G |
| TCGA-09-1665 | ZFYVE26    | ENST00000347230 | p.L1630V | c.4888T>G | Verified   | TTC | TTG | GCC | 1 | T | G |
| TCGA-29-2427 | ZFYVE26    | ENST00000347230 | p.L1038L | c.3114T>G | Verified   | CTG | CTT | ATG | 3 | T | G |
| TCGA-61-1733 | ZKSCAN2    | ENST00000328086 | p.L364L  | c.1092T>G | Unverified | ACA | CTT | CAG | 3 | T | G |
| TCGA-61-1733 | ZKSCAN2    | ENST00000328086 | p.L364L  | c.1092T>G | Unverified | ACA | CTT | CAG | 3 | T | G |
| TCGA-61-1907 | ZNF117     | ENST00000282869 | p.S457S  | c.1371T>G | Unverified | CAA | TCT | TCA | 3 | T | G |
| TCGA-20-1683 | ZNF18      | ENST00000322748 | p.C525W  | c.1575T>G | Unverified | CAC | TGT | GGG | 3 | T | G |
| TCGA-13-0795 | ZNF197     | ENST00000344387 | p.I666M  | c.1998T>G | Verified   | ctc | att | tta | 3 | T | G |
| TCGA-09-1674 | ZNF44_ENS1 | ENST00000355684 | p.C202W  | c.606T>G  | Unverified | TTG | TGT | GGG | 3 | T | G |
| TCGA-24-2280 | ZNF485_EN5 | ENST00000361807 | p.F20V   | c.58T>G   | Unverified | GCC | TTT | ACC | 1 | T | G |
| TCGA-04-1338 | ZNF518B    | ENST00000326756 | p.A928A  | c.2784T>G | Verified   | GCA | GCT | AAG | 3 | T | G |
| TCGA-29-1693 | ZNF528     | ENST00000360465 | p.F123C  | c.368T>G  | Unverified | CTA | TTT | CAA | 2 | T | G |
| TCGA-30-1857 | ZNF532     | ENST00000336078 | p.I691R  | c.2072T>G | Unverified | ATG | ATA | GTT | 2 | T | G |
| TCGA-20-0991 | ZNF547     | ENST00000282282 | p.F276V  | c.826T>G  | Verified   | AAG | TTC | TTT | 1 | T | G |
| TCGA-24-2289 | ZNF567     | ENST00000360729 | p.C283G  | c.847T>G  | Unverified | GAA | TGT | GGT | 1 | T | G |
| TCGA-13-1501 | ZNF57      | ENST00000306908 | p.H410Q  | c.1230T>G | Verified   | GGT | CAT | TTG | 3 | T | G |
| TCGA-13-1501 | ZNF57      | ENST00000306908 | p.H410Q  | c.1230T>G | Verified   | GGT | CAT | TTG | 3 | T | G |
| TCGA-13-0906 | ZNF780B    | ENST00000434248 | p.G357G  | c.1071T>G | Verified   | ATG | GGT | GAG | 3 | T | G |
| TCGA-30-1718 | ZNF804A    | ENST00000302277 | p.F216L  | c.648T>G  | Unverified | TCT | TTT | GCA | 3 | T | G |
| TCGA-29-2427 | ZNFX1      | ENST00000371752 | p.F1453C | c.4358T>G | Verified   | TGC | TTC | GAA | 2 | T | G |

TCGA-61-2102 ZSCAN4 ENST00000318203 p.V133G c.398T>G Verified TTA GTC CAC 2 T G
