# Supplementary material for: Association between targeted somatic mutation (TSM) signatures and HGS‐OvCa progression
Source: PubMed Central journal article supplement (PMC5055158; doi:10.1002/cam4.825), 2016-08-03
Supplement: CAM4-5-2629-s003.pdf [file CAM4-5-2629-s003.pdf]

**Supporting Information Table S2.  
Mutation Data. (Lindley et al, 2015)**

**TSM MUTATIONS**

**AID**

| WRC <u>G</u> SS | MC1       | MC2 | MC3 |
|-----------------|-----------|-----|-----|
| C>A             | 1         | 3   | 4   |
| C>G             | 5         | 4   | 5   |
| C>T             | <b>45</b> | 13  | 45  |

P-value 5.18E-39

**APOBEC3B**

| T <u>C</u> GA | MC1       | MC2 | MC3       |
|---------------|-----------|-----|-----------|
| C>A           | 3         | 0   | 13        |
| C>G           | 14        | 1   | 6         |
| C>T           | <b>21</b> | 12  | <b>25</b> |

P-value 5.8E-12

| AT <u>C</u> S | MC1 | MC2 | MC3       |
|---------------|-----|-----|-----------|
| C>A           | 12  | 8   | 19        |
| C>G           | 10  | 7   | 20        |
| C>T           | 25  | 12  | <b>63</b> |

P-value 9.76E-26

**APOBEC3G**

| G <u>C</u> GGC | MC1       | MC2 | MC3 |
|----------------|-----------|-----|-----|
| C>A            | 1         | 0   | 1   |
| C>G            | 3         | 0   | 0   |
| C>T            | <b>30</b> | 13  | 13  |

P-value 1.06E-25

| <u>CCGX</u> | MC1       | MC2 | MC3 |
|-------------|-----------|-----|-----|
| C>A         | 11        | 4   | 12  |
| C>G         | 14        | 4   | 11  |
| C>T         | <b>92</b> | 34  | 59  |

P-value 1.78E-57

| <u>ZCCG</u> | MC1        | MC2 | MC3 |
|-------------|------------|-----|-----|
| C>A         | 13         | 5   | 5   |
| C>G         | 9          | 6   | 9   |
| C>T         | <b>100</b> | 45  | 71  |

P-value 2.64E-71

| <u>SGGR</u> | MC1 | MC2       | MC3 |
|-------------|-----|-----------|-----|
| G>A         | 56  | <b>75</b> | 70  |
| G>C         | 13  | 22        | 10  |
| G>T         | 19  | 26        | 18  |

P-value 1.62E-31

| <u>GCGC</u> | MC1 | MC2       | MC3 |
|-------------|-----|-----------|-----|
| G>A         | 17  | <b>59</b> | 17  |
| G>C         | 3   | 3         | 1   |
| G>T         | 5   | 5         | 5   |

P-value 2.63E-44

| <u>CCGGC</u> | MC1 | MC2       | MC3 |
|--------------|-----|-----------|-----|
| G>A          | 5   | <b>16</b> | 6   |
| G>C          | 0   | 3         | 0   |
| G>T          | 2   | 1         | 1   |

P-value 5.57E-11

| <u>TCCG</u> | MC1 | MC2 | MC3 |
|-------------|-----|-----|-----|
| C>A         | 5   | 2   | 2   |

|     |    |    |           |
|-----|----|----|-----------|
| C>G | 3  | 0  | 3         |
| C>T | 54 | 18 | <b>37</b> |

P-value 3.28E-45

## ADARS

| <u>RAW</u> A | MC1       | MC2 | MC3 |
|--------------|-----------|-----|-----|
| A>C          | 12        | 13  | 14  |
| A>G          | 37        | 21  | 25  |
| A>T          | <b>46</b> | 19  | 18  |

P-value 1.37E-09

| <u>WT</u> A | MC1       | MC2 | MC3 |
|-------------|-----------|-----|-----|
| A>C         | 10        | 2   | 10  |
| A>G         | <b>30</b> | 16  | 11  |
| A>T         | 21        | 4   | 10  |

P-value 1.6E-09

| <u>SAR</u> A | MC1       | MC2 | MC3 |
|--------------|-----------|-----|-----|
| A>C          | 13        | 9   | 18  |
| A>G          | <b>56</b> | 38  | 24  |
| A>T          | 43        | 44  | 29  |

P-value 1.47E-13

| <u>I</u> WTY | MC1 | MC2       | MC3       |
|--------------|-----|-----------|-----------|
| T>A          | 22  | 11        | 21        |
| T>C          | 11  | <b>26</b> | <b>36</b> |
| T>G          | 4   | 12        | 6         |

P-value 1.11E-10
